# Supplementary material for: Reliability of hospital scores for the Cancer Patient Experience Survey: analysis of publicly reported patient survey data
Source: PubMed Central journal article supplement — BMJ Open. 2019 Jul 24;9(7):e029037. doi: 10.1136/bmjopen-2019-029037 (PMC6661614; doi:10.1136/bmjopen-2019-029037), 2019-07-24
Supplement: bmjopen-2019-029037.draft_revisions.pdf [file bmjopen-2019-029037.draft_revisions.pdf]

# BMJ Open

BMJ Open is committed to open peer review. As part of this commitment we make the peer review history of every article we publish publicly available.

When an article is published we post the peer reviewers' comments and the authors' responses online. We also post the versions of the paper that were used during peer review. These are the versions that the peer review comments apply to.

The versions of the paper that follow are the versions that were submitted during the peer review process. They are not the versions of record or the final published versions. They should not be cited or distributed as the published version of this manuscript.

BMJ Open is an open access journal and the full, final, typeset and author-corrected version of record of the manuscript is available on our site with no access controls, subscription charges or pay-per-view fees (<http://bmjopen.bmj.com>).

If you have any questions on BMJ Open's open peer review process please email [info.bmjopen@bmj.com](mailto:info.bmjopen@bmj.com)

# BMJ Open

## The reliability of hospital scores for the Cancer Patient Experience Survey: analysis of publicly reported patient survey data

|                               |                                                                                                                                                                                                                                                                                                                                                                                                                                                                     |
|-------------------------------|---------------------------------------------------------------------------------------------------------------------------------------------------------------------------------------------------------------------------------------------------------------------------------------------------------------------------------------------------------------------------------------------------------------------------------------------------------------------|
| Journal:                      | <i>BMJ Open</i>                                                                                                                                                                                                                                                                                                                                                                                                                                                     |
| Manuscript ID                 | bmjopen-2019-029037                                                                                                                                                                                                                                                                                                                                                                                                                                                 |
| Article Type:                 | Research                                                                                                                                                                                                                                                                                                                                                                                                                                                            |
| Date Submitted by the Author: | 11-Jan-2019                                                                                                                                                                                                                                                                                                                                                                                                                                                         |
| Complete List of Authors:     | Abel, Gary; University of Exeter, University of Exeter Medical School (Primary Care)<br>Gomez-Cano, Mayam; University of Exeter, University of Exeter Medical School (Primary Care)<br>Pham, Tra My; University College London , Behavioural Science and Health; University College London, Primary Care and Population Health<br>Lyratzopoulos, Georgios ; University College London, Department of Epidemiology & Public Health, Health Behaviour Research Centre |
| Keywords:                     | ONCOLOGY, Quality Improvement, Medical Management, Health service research, Patients, Health policy < HEALTH SERVICES ADMINISTRATION & MANAGEMENT                                                                                                                                                                                                                                                                                                                   |
|                               |                                                                                                                                                                                                                                                                                                                                                                                                                                                                     |

SCHOLARONE™  
Manuscripts

# The reliability of hospital scores for the Cancer Patient Experience Survey: analysis of publicly reported patient survey data

Gary A Abel, Mayam Gomez-Cano, Tra My Pham, Georgios Lyratzopoulos

Gary A Abel, Senior Lecturer, University of Exeter Medical School, [g.a.abel@exeter.ac.uk](mailto:g.a.abel@exeter.ac.uk)

Mayam Gomez-Cano, Postdoctoral Research Associate, University of Exeter Medical School, [m.c.gomez-cano@exeter.ac.uk](mailto:m.c.gomez-cano@exeter.ac.uk)

Tra My Pham, Research Associate, University College London, [tra.pham.09@ucl.ac.uk](mailto:tra.pham.09@ucl.ac.uk)

Georgios Lyratzopoulos, Professor of Cancer Epidemiology, University College London, [y.lyratzopoulos@ucl.ac.uk](mailto:y.lyratzopoulos@ucl.ac.uk)

Corresponding Author

Gary A Abel

University of Exeter Medical School (Primary Care)

Smeall Building

St Luke's Campus

Exeter

EX1 2LU

UK

[g.a.abel@exeter.ac.uk](mailto:g.a.abel@exeter.ac.uk)

## Declarations.

**Competing Interests.** The authors report grants from MacMillan Cancer Support, during the conduct of the study. GA and GL have acted as academic consultants providing methodological advice to NHS England Insight team regarding the Cancer Patient Experience Survey.

**Funding.** This research was funded by Macmillan Cancer Support (grant number 5995414). GL is funded by a Cancer Research UK Advanced Clinician Scientist Fellowship award (grant number C18081/A18180). The work presented here represents that of the authors and does not necessarily represent those of the funding organisations.

**Ethical Approval.** This study is entirely based on publically available data and so ethical approval is not required.

**Guarantor.** GA is guarantor for this paper

**Contributorship.** GA and GL conceived and designed the study. GA developed the methodological framework. MGC performed the analysis. All authors contributed to the interpretation of findings and the drafting of the manuscript.

**Acknowledgments.** We thank the NHS England as commissioner of the 2016 Cancer Patient Experience Survey, Quality Health as data collector and publisher of the dataset, all NHS Acute Trusts in England for provision of data samples, and all patients who responded to the survey.

1  
2  
3 **Data sharing statement.** This study is based entirely on publically available data which can  
4 be found at <http://www.ncpes.co.uk/reports/2016-reports/local-reports-1/data-tables-1>  
5

6 The Corresponding Author has the right to grant on behalf of all authors and does grant on  
7 behalf of all authors, a worldwide licence  
8 ([http://www.bmj.com/sites/default/files/BMJ%20Author%20Licence%20March%202013.do](http://www.bmj.com/sites/default/files/BMJ%20Author%20Licence%20March%202013.doc)  
9 c) to the Publishers and its licensees in perpetuity, in all forms, formats and media (whether  
10 known now or created in the future), to i) publish, reproduce, distribute, display and store the  
11 Contribution, ii) translate the Contribution into other languages, create adaptations, reprints,  
12 include within collections and create summaries, extracts and/or, abstracts of the Contribution  
13 and convert or allow conversion into any format including without limitation audio, iii) create  
14 any other derivative work(s) based in whole or part on the on the Contribution, iv) to exploit  
15 all subsidiary rights to exploit all subsidiary rights that currently exist or as may exist in the  
16 future in the Contribution, v) the inclusion of electronic links from the Contribution to third  
17 party material where-ever it may be located; and, vi) licence any third party to do any or all  
18 of the above.  
19  
20  
21  
22

## 23 **Abstract**

24  
25 **Objectives** To assess the degree to which variations in publicly reported hospital scores  
26 arising from the English Cancer Patient Experience Survey (CPES) are subject to chance.

27  
28 **Design** Secondary analysis of publically reported data.

29  
30 **Setting** English National Health Service hospitals

31  
32 **Participants** Patients who were recently treated for cancer in one of 146 hospitals and  
33 responded to the 2016 English Cancer Patient Experience Survey

34  
35 **Main outcome measures** Spearman-Brown reliability of hospital scores on 51 evaluative  
36 questions regarding cancer care.

37  
38 **Results** Hospitals varied in respondent sample size with a median hospital sample size of 419  
39 responses (range 31 - 1972). There were some hospitals with generally highly reliable scores  
40 across most questions, whereas other hospitals had generally unreliable scores (the median  
41 reliability of question scores within individual hospitals varied between 0.11 and 0.86).  
42 Similarly, there were some questions with generally high reliability across most hospitals  
43 whereas other questions had generally low reliability. Of the 7,377 individual hospital scores  
44 publically reported (146 hospitals by 51 questions, minus 69 suppressed scores), only 34%  
45 reached a reliability of 0.7, the minimum generally considered to be useful. In order for 80%  
46 of the individual hospital scores to reach a reliability of 0.7, some hospital would require a  
47 four-fold increase in number of respondents; although in a few other hospitals sample sizes  
48 could be reduced.  
49  
50  
51  
52

53 **Conclusions** The English Patient Experience Survey represents a globally unique source for  
54 understanding cancer patient experience, but in its present form it is not reliable for high  
55 stakes comparisons of the performance of different hospitals. Revised sampling strategies and  
56 survey questions could help increase the reliability of hospital scores, and thus make the  
57 survey fit for use in performance comparisons.  
58  
59  
60

### Strengths and limitations of this study

- Although there are thousands of healthcare quality indicators in current use, most are bereft of any evaluation of their statistical reliability. This paper addresses this lack of evidence for a globally unique patient experience survey.
- By making use of the actual data used in public reporting of a high profile survey with a high response rate we are able make direct inferences about the quality indicators under consideration.
- By understanding the different reasons behind hospital scores lacking in reliability we are able to suggest ways of increasing the reliability of the items in the relevant survey.
- This study only considers the crude hospital scores and not those adjusted for patient case-mix which have recently been reported. However, as we expect any such adjustment to result in lower reliabilities the conclusions of the study remain valid.

## Introduction

‘Before you can improve it you first have to measure it’ is a common adage of the quality improvement movement. Coupled with a tendency towards greater public accountability, this maxim has led to an ever-increasing number of measurement initiatives, typically underpinned by public reporting of scores of healthcare organisations.<sup>1, 2</sup>

Together with patient safety and clinical effectiveness, patient experience is being increasingly accepted as a distinct dimension of care quality. Relatedly, policy-makers regularly commission large scale nationwide patient surveys in the US and the UK.<sup>3-5</sup> Most such surveys are aimed at patients with diverse range of conditions. However, a repeatable disease-specific survey for cancer patients was launched in England in 2010, and its findings are reported publicly and used by healthcare improvement teams in constructing and evaluating action plans.

The statistical reliability of measures of care quality remains a concern, as often the sample sizes involved in organisational comparisons are small. Ideally, measurement initiatives should follow prior examination the statistical properties of indicators, but this is rarely the case. Some previous UK work has examined the reliability of indicators of stage at diagnosis, diagnostic activity, general practice patient experience and general practice high risk prescribing, on the whole providing cautionary findings indicating the risk of unreliability of organisational rankings.<sup>6-10</sup> Similar approaches and findings have been reported from the US and Dutch settings.<sup>11-17</sup>

These considerations highlight the need for examining the reliability of hospital scores for the Cancer Patient Experience survey, and have motivated us to examine this question empirically in this study. Its aim was to provide a detailed profile of the statistical reliability (and therefore of the role of chance) in hospital scores derived from the Cancer Patient Experience Survey.

## Methods

### Data

Data were analysed relating to respondents to the 2016 National Cancer Patient Experience Survey. Respondents comprised patients aged 16 years and above who were treated for cancer in English National Health Service (NHS) hospitals during April-June 2016. The patients had relevant ICD10 codes for cancer (C00-99 excluding C44 and C84, and D05) and were known to be alive on the day of survey mail out. Questionnaires were sent by post and responses could be made by post, online or using a telephone translation service. Details of

the survey and method of administration have been published previously<sup>18</sup>. In this study we make use of publically reported hospital level data<sup>19</sup>.

Survey questions have up to 7 response options which are dichotomised for public reporting such that hospitals scores represent the percentage of patients reporting a positive experience for each question. Scores are produced for hospital trusts and Clinical Commissioning Groups (CCG). Further details are given in the Technical Documentation<sup>20</sup>.

We calculated the Spearman-Brown (inter-unit) reliability of each hospital score. This is equivalent to the proportion of variation in hospital-level mean scores (for a given hospital sample size) attributable to the true (underlying) variation between them. Following previous work, we estimated reliability by partitioning the observed variability in hospital scores into two components, variability between hospitals and variability within hospitals, using mixed effects logistic regression models<sup>6, 21</sup>. For each question, a random intercept model (with no fixed effects other than the constant) was used to estimate the between hospital variance on the log-odds scale. This variance is a measure of the true (underlying) variation which can be thought of as that which would be seen with very large sample sizes in each hospital, such that the influence of sampling variation would be minimal<sup>6, 21</sup>. Since our scores are binary measures, the within hospital variance also depends on the level of achievement at each hospital, and can be described by the binomial distribution. In this context, for each question the reliability  $\lambda$  of hospital  $i$  is given by

$$\lambda_i = \frac{\sigma_b^2}{\sigma_b^2 + \frac{1}{p_i(1-p_i)n_i}} \quad 1$$

Where  $\sigma_b^2$  is the true (underlying) between hospital variance on the log-odds scale,  $p_i$  is the observed proportion of patients reporting a positive experience in hospital  $i$  and  $n_i$  is the sample size of hospital  $i$ .

Where less than 21 responses were received for an individual question for a hospital, results were not publicly reported. Of the 148 hospitals included in the survey there were two hospitals with less than 21 responses for every question. We excluded these two hospitals from our analysis. However there remained 69 suppressed scores (from 18 hospitals) in the publically reported data due to low numbers of respondents to certain questions applicable to only some patients. These scores were excluded from the analysis.

We calculated reliability for every hospital score on each question (a total of 146 hospitals multiplied by 51 questions = 7,446 individual scores, minus 69 suppressed scores = 7,377 individual scores).

Additionally, the model outputs were used to estimate the increase in sample size required for each hospital to reach a reliability of 0.7 for each question<sup>6, 21</sup>. We used R version 3.4.4 for all analyses.

### **Patient involvement**

The Cancer Patient Experience Survey development and administration are supported by an advisory group which includes patient advocates. The present study forms part of a wider project funded by MacMillan Cancer Support for which there is an advisory group with patient representative participation.

## Results

Overall, there were 72,756 respondents to the National Cancer Patient Experience Survey in 2016 (response rate 66.3%) who were treated at the 146 hospitals included in our analysis. Hospitals varied in respondent sample size with a median of 419 responses (range 31 - 1972). Due to different sections of the questionnaire corresponding to different care pathways, not all questions were applicable to all patients and so the number of respondents varied considerably for each of the 51 questions. The number of respondents answering individual questions varied between 15,968 (22%) and 71,773 (99%) with a median of 52,786 (73%). The number of respondents for each question in each hospital is shown in Figure 1 and supplementary material Table 1.

[Insert Figure 1.]

The percentage of patients reporting a positive experience was highly variable between questions and between hospitals (Figure 2 and supplementary material Table 2). The median percentage of patients reporting positive experience across individual questions was 79% (range 29% - 96%) while the corresponding median across individual hospitals was 75% (range 51% - 82%).

[Insert Figure 2.]

Figure 3 (and supplementary material Table 3) shows the reliability of the score for each question at each hospital. There were some hospitals with generally high reliability across most questions, whereas others had generally low reliability across survey items. The median reliability of question scores within individual hospitals was 0.60 (range 0.11 – 0.86). Similarly there were some questions with generally high reliability whereas others had generally low reliability. The median reliability of hospital scores within individual questions was 0.58 (range 0.21 – 0.93).

[Insert Figure 3.]

Given that reliability depends on the sample size, the between hospital variance and the hospital performance, we can examine how these factors influence reliability. Hospitals which tended to have low reliability also had small sample sizes. Also questions with low reliability tended to be those where the between-hospital variance is low. However, there are some exceptions to this which can be seen as the horizontal lines composed mostly of red squares in Figure 3. Some CPES questions are unreliable across all hospitals because they have, across all hospitals, a small number of respondents to that particular question. Examples include questions only applicable to patients treated by radiotherapy (questions 44 and 45). In general, questions with small sample sizes relate to patients on a particular care pathway. Other cases of low reliability can be seen in questions for which hospitals performance is consistently high (questions 5 and 25).

Overall the reliability of hospitals scores for the survey is low. Of the 7,377 individual hospital-question pairs, only 34 % reached a reliability of 0.7, the minimum generally considered to be useful. As it is possible to improve reliability by increasing the sample size we calculated how many multiples of the current sample size would be required to reach a reliability of 0.7 for each question. 80% of the individual hospital scores would have



1  
2  
3 achieved a reliability of 0.7 or more with 4 times as much data (or within 4 years of data  
4 collection, assuming yearly surveys).  
5

## 6 **Discussion**

7  
8 In this study we have profiled the reliability of a high-profile national patient experience  
9 survey for cancer patients. Our findings show that about two-thirds of hospital scores in this  
10 survey do not meet reliability levels generally accepted as useful. In practical terms this  
11 means that identification of hospitals that are performing well in specific aspects of care is  
12 hampered due to the influence of chance. The lack of reliability can be attributed to different  
13 factors which have variable influence.  
14  
15

16 Although there are thousands of healthcare quality indicators in current use, most are bereft  
17 of any evaluation of their statistical reliability. Patient experience scores of English general  
18 practices arising from early waves of the GPPS survey were found to have very high  
19 reliability, enabling subsequent reductions in the survey sample.<sup>7,8</sup> In contrast, the present  
20 study, examining the reliability of CPES hospital scores for the first time, suggests the need  
21 for increases in the survey samples (see below). The present study forms part of an emerging  
22 body of literature examining the reliability of a diverse range of quality indicators, including  
23 from the UK, the US and The Netherlands<sup>6-17, 20, 21</sup>; we would nonetheless like to re-  
24 emphasise the mismatch between the very large number of indicators in current use and the  
25 small number of indicators that have been profiled for their reliability.  
26  
27  
28

29 The key strength of this study is the use of the actual data used in public reporting of a high  
30 profile survey with a high response rate. Its main limitation is that our analysis does not take  
31 into account the influence of patient case-mix. Certain patient groups have systematic  
32 tendencies towards reporting positive experiences compared to others<sup>22, 23</sup> and for this reason  
33 the results of the survey are reported in both adjusted and unadjusted form. Nonetheless, as  
34 patient case-mix explains some of the variability between hospitals<sup>24</sup>, had we calculated the  
35 reliability of case-mix adjusted scores we would have found the reliability would have been  
36 even lower than that presented here.  
37  
38  
39

40 There are some hospitals that have low reliability for most questions as they treat a small  
41 number of patients, meaning that the uncertainty on their scores is inherently high. Further,  
42 there are some questions with low reliability due to limited true (underlying) variation  
43 between hospitals. In such cases, it is very hard to distinguish between hospitals since they  
44 are all performing at a similar level. As a consequence, in the absence of very large sample  
45 sizes, the observed variability between hospitals will be dominated by chance. A particular  
46 example of this phenomenon occurs for questions whose performance is consistently  
47 high/low across hospitals. It is harder to distinguish hospitals when performance is close to  
48 0% or 100%. Lastly, there are other questions with a small number of respondents as they are  
49 applicable to only subsets of patients. In brief the key mechanisms leading to low reliability  
50 are small hospital-level respondent sample, limited variability between hospitals (including  
51 because of ceiling/flooring effects) and small survey-level respondent sample.  
52  
53  
54

55 Given one of the main uses of NCPES is to inform hospital level performance, one might  
56 suggest that in its current form the survey is not fit for one of its main intended purposes  
57 (though it should be noted that the reliability limitations we report do not affect the use of the  
58 survey for providing national-level intelligence about the experience of cancer patients across  
59  
60

English hospitals). It could be argued that rather than suppressing score made on the basis of less than 20 respondents as is currently done, all scores which have a reliability below 0.7 should be suppressed. Work in other contexts have shown that when reliability of metrics is low there is a large amount of misclassification of performance.<sup>21, 25</sup> At the very least we believe that users of the survey results should be made aware of the reliability of the hospital scores (with such reliability estimates accompanying the publicly reported scores) so that an informed interpretation can be made by patients, clinicians, managers and members of the public. There is a range of reasons why such transparent reporting of reliability of hospital scores may be useful. For example, a hospital may chose to focus improvement efforts on those questions where they perform worse than average *and* where they know their scores to be reliable. As we already noted, hospital comparisons are not the only purpose of the NCPES. National assessments of patient experiences are supported by CPES and these data have been used to investigate variation and disparities in care between patient groups<sup>22, 23</sup>. For these uses that do not involve organisational comparisons, concerns about the lack of inter-unit reliability are not applicable.

There are various ways in which the survey could be changed in response to these findings. Firstly, by redesigning the survey instrument or related reporting conventions. For example, questions where the variability between hospitals is very low could be considered as candidates for removal from subsequent survey waves as there is little point in classifying hospitals on aspects of care for which they have no tangible differences between them. A similar approach could be taken for questions where hospital performance is very high, although it may also be possible to add to or redesign the response options (or associated reporting conventions) to bring the mean reported scores closer to 50% - which will increase the reliability of these items. We do note that in both these situations there is something to be celebrated as a lack of variability suggests equitable healthcare delivery and -in the context of 'ceiling' effects, a high performance implies high quality health care delivery. However, continued measurement of such aspect may not be the best use of patient survey resources. It is not without irony that the aims of quality improvement efforts underpinned by patient surveys are to improve service and reduce disparities, both of which reduce reliability and in turn reduce the usefulness of such survey items.

Another way by which reliability could be increased is to increase the sample size. Currently the NCPES sample consists of all patients treated in a particular three-month period. If a whole year sample was used instead we would have up to four times as many patients available. Our findings suggest that the vast majority of hospitals-level scores in such a case would be reliable, though of course there would be an increase in cost of delivering the survey. Rather than continuing with the current 'census' approach (whereby all patients who fit eligibility criteria during the survey sampling period form part of the sampling frame), probability sampling could be used. This would mean surveying more patients than is currently done in hospitals treating small numbers of cancer patients and fewer than currently done in those treating many cancer patients, potentially having little impact on the total sample size. Fixed target respondent numbers per unit of assessment are already used in a number of NHS and international surveys<sup>4, 5</sup>. Aggregating multiple years of survey results will also improve reliability, though it will reduce the timeliness of scores and potentially reduce the usability of the findings.

## Conclusion

1  
2  
3 The English Patient Experience Survey represents a globally unique source for understanding  
4 cancer patient experience, but in its present form it is not reliable for high stakes comparisons  
5 of the performance of different hospitals. In profiling the survey we have found that around  
6 two-thirds of hospital scores are not reliable. This severely hampers the use of this survey for  
7 hospital comparisons and raises questions over the suitability of its current design.  
8  
9 Classifying hospitals as being a poor performer on an unreliable question may lead to unfair  
10 reputational loss and misplaced quality improvement efforts resulting in an opportunity cost.  
11  
12 Classifying hospitals as high performers on unreliable questions may lead to false reassurance  
13 in related areas thus missing the opportunity for improvement. Redesigning the questions and  
14 sampling strategy used could dramatically improve the percentage of reliable hospital scores  
15 and thus making the survey far more useful.  
16  
17  
18  
19

## 20 Figure legends

21 **Figure 1** Sample sizes for each of the 146 hospitals included in the analysis by question  
22 (CPES 2016). Each rectangle corresponds to a single hospital and question. Its colour  
23 indicates one of five sample size categories as shown on the legend. The exact values for  
24 each cell in this plot are provided in supplementary material Table 1.  
25  
26

27 **Figure 2** Proportions of patients reporting a positive experience by question and for each of  
28 the 146 hospitals included in the analysis (CPES 2016). Each rectangle corresponds to a  
29 single hospital and question. Its colour indicates one of five proportions categories as shown  
30 on the legend. The exact values for each cell in this plot are provided in supplementary  
31 material Table 2.  
32  
33

34 **Figure 3** Main central grid: Reliability of hospital scores for each of the 146 hospitals  
35 included in the analysis (CPES 2016). Each rectangle corresponds to a single hospital and  
36 question. Its colour indicates one of four reliability categories as shown on the legend. Left  
37 hand side plot: The variance for each question on the log odds scale. The order of the  
38 questions has the same order than that of the main grid and is sorted from the question with  
39 lowest between hospital variance to the question with greatest between hospital variance.  
40 Bottom plot: The sample size for each hospital in terms of the total number of responders.  
41 The order of the hospitals has the same order than that of the main grid and is sorted from the  
42 hospital with the smallest sample size to the hospital with greatest sample size. The exact  
43 values for each cell in this plot are provided in the supplementary material Table 3.  
44  
45  
46  
47  
48  
49

- 50 1. Quality Watch. NHS & Social Care Quality Indicators - Data & Statistics  
51 <http://www.qualitywatch.org.uk/indicators> (accessed 09/07/2018).
- 52 2. NHS Digital. Compendium of Population Health Indicators [https://digital.nhs.uk/data-and-](https://digital.nhs.uk/data-and-information/publications/ci-hub/compendium-indicators)  
53 [information/publications/ci-hub/compendium-indicators](https://digital.nhs.uk/data-and-information/publications/ci-hub/compendium-indicators).
- 54 3. Centers for Medicare & Medicaid Services. Consumer Assessment of Healthcare Providers &  
55 Systems (CAHPS), <https://www.cms.gov/Research-Statistics-Data-and-Systems/Research/CAHPS/>  
56 (accessed 07/09/2018).
- 57 4. Ipsos MORI. 2018 GP Patient Survey Results Released, [https://www.ipsos.com/ipsos-](https://www.ipsos.com/ipsos-mori/en-uk/2018-gp-patient-survey-results-released)  
58 [mori/en-uk/2018-gp-patient-survey-results-released](https://www.ipsos.com/ipsos-mori/en-uk/2018-gp-patient-survey-results-released) (2018, accessed 07/09/2018).  
59  
60

- 1
  - 2
  - 3
  - 4
  - 5
  - 6
  - 7
  - 8
  - 9
  - 10
  - 11
  - 12
  - 13
  - 14
  - 15
  - 16
  - 17
  - 18
  - 19
  - 20
  - 21
  - 22
  - 23
  - 24
  - 25
  - 26
  - 27
  - 28
  - 29
  - 30
  - 31
  - 32
  - 33
  - 34
  - 35
  - 36
  - 37
  - 38
  - 39
  - 40
  - 41
  - 42
  - 43
  - 44
  - 45
  - 46
  - 47
  - 48
  - 49
  - 50
  - 51
  - 52
  - 53
  - 54
  - 55
  - 56
  - 57
  - 58
  - 59
  - 60
5. Care Quality Commission. Adult inpatient survey 2017: Statistical release, <https://www.cqc.org.uk/publications/surveys/adult-inpatient-survey-2017> (2018).
6. Abel G, Saunders CL, Mendonca SC, et al. Variation and statistical reliability of publicly reported primary care diagnostic activity indicators for cancer: a cross-sectional ecological study of routine data. *BMJ Quality & Safety* 2018; 27: 21-30. DOI: 10.1136/bmjqs-2017-006607.
7. Roland M, Elliott M, Lyratzopoulos G, et al. Reliability of patient responses in pay for performance schemes: analysis of national General Practitioner Patient Survey data in England. *BMJ* 2009; 339. DOI: 10.1136/bmj.b3851.
8. Lyratzopoulos G, Elliott MN, Barbiere JM, et al. How can health care organizations be reliably compared?: Lessons from a national survey of patient experience. *Medical care* 2011; 49: 724-733. 2011/05/26. DOI: 10.1097/MLR.0b013e31821b3482.
9. Stocks SJ, Kontopantelis E, Akbarov A, et al. Examining variations in prescribing safety in UK general practice: cross sectional study using the Clinical Practice Research Datalink. *BMJ* 2015; 351. DOI: 10.1136/bmj.h5501.
10. Guthrie B, McCowan C, Davey P, et al. High risk prescribing in primary care patients particularly vulnerable to adverse drug events: cross sectional population database analysis in Scottish general practice. *BMJ* 2011; 342. DOI: 10.1136/bmj.d3514.
11. Verburg IWM, de Keizer NF, Holman R, et al. Individual and Clustered Rankability of ICUs According to Case-Mix-Adjusted Mortality\*. *Critical Care Medicine* 2016; 44: 901-909. DOI: 10.1097/ccm.0000000000001521.
12. Guglielminotti J and Li G. Monitoring Obstetric Anesthesia Safety across Hospitals through Multilevel Modeling. *Anesthesiology* 2015; 122: 1268-1279. DOI: 10.1097/ALN.0000000000000617.
13. Krell RW, Hozain A, Kao LS, et al. Reliability of risk-adjusted outcomes for profiling hospital surgical quality. *JAMA Surgery* 2014; 149: 467-474. DOI: 10.1001/jamasurg.2013.4249.
14. Shih T and Dimick JB. Reliability of Readmission Rates as a Hospital Quality Measure in Cardiac Surgery. *The Annals of Thoracic Surgery* 2014; 97: 1214-1218. DOI: <https://doi.org/10.1016/j.athoracsur.2013.11.048>.
15. Van Dishoeck A-M, Lingsma HF, Mackenbach JP, et al. Random variation and rankability of hospitals using outcome indicators. *BMJ Quality & Safety* 2011; 20: 869-874. DOI: 10.1136/bmjqs.2010.048058.
16. Henneman D, van Bommel ACM, Snijders A, et al. Ranking and Rankability of Hospital Postoperative Mortality Rates in Colorectal Cancer Surgery. *Annals of Surgery* 2014; 259: 844-849. DOI: 10.1097/sla.0000000000000561.
17. Sequist TD, Schneider EC, Li A, et al. Reliability of Medical Group and Physician Performance Measurement in the Primary Care Setting. *Medical care* 2011; 49: 126-131. DOI: 10.1097/MLR.0b013e3181d5690f.
18. Quality Health. Guidance material and survey material, <http://www.ncpes.co.uk/reports/2016-reports/guidance-material-and-survey-materials/3211-2016-cancer-survey-guidance/file> (2016).
19. Quality Health. National Cancer Experience Survey 2016. Reports. Data tables, <http://www.ncpes.co.uk/reports/2016-reports/local-reports-1/data-tables-1> (2017).
20. Quality Health. Technical Documentation, <http://www.ncpes.co.uk/reports/2016-reports/guidance-material-and-survey-materials/3210-2016-national-cancer-patient-experience-survey-technical-documentation/file> (2016).
21. Barclay ME, Lyratzopoulos G, Greenberg DC, et al. Missing data and chance variation in public reporting of cancer stage at diagnosis: Cross-sectional analysis of population-based data in England. *Cancer Epidemiology* 2018; 52: 28-42. DOI: <https://doi.org/10.1016/j.canep.2017.11.005>.
22. El Turabi A, Abel GA, Roland M, et al. Variation in reported experience of involvement in cancer treatment decision making: evidence from the National Cancer Patient Experience Survey. *British Journal Of Cancer* 2013; 109: 780. Epidemiology. DOI: 10.1038/bjc.2013.316 <https://www.nature.com/articles/bjc2013316#supplementary-information>.

- 1  
2  
3 23. Saunders CL, Abel GA and Lyratzopoulos G. Inequalities in reported cancer patient  
4 experience by socio-demographic characteristic and cancer site: evidence from respondents to the  
5 English Cancer Patient Experience Survey. *European Journal of Cancer Care* 2015; 24: 85-98. DOI:  
6 doi:10.1111/ecc.12267.  
7  
8 24. Abel GA, Saunders CL and Lyratzopoulos G. Cancer patient experience, hospital performance  
9 and case mix: evidence from England. *Future Oncology* 2014; 10: 1589-1598. DOI:  
10 10.2217/fon.13.266.  
11 25. Yu H, Mehrotra A and Adams J. Reliability of utilization measures for primary care physician  
12 profiling. *Healthcare* 2013; 1: 22-29. DOI: <https://doi.org/10.1016/j.hjdsi.2013.04.002>.  
13  
14  
15  
16  
17  
18  
19  
20  
21  
22  
23  
24  
25  
26  
27  
28  
29  
30  
31  
32  
33  
34  
35  
36  
37  
38  
39  
40  
41  
42  
43  
44  
45  
46  
47  
48  
49  
50  
51  
52  
53  
54  
55  
56  
57  
58  
59  
60

For peer review only

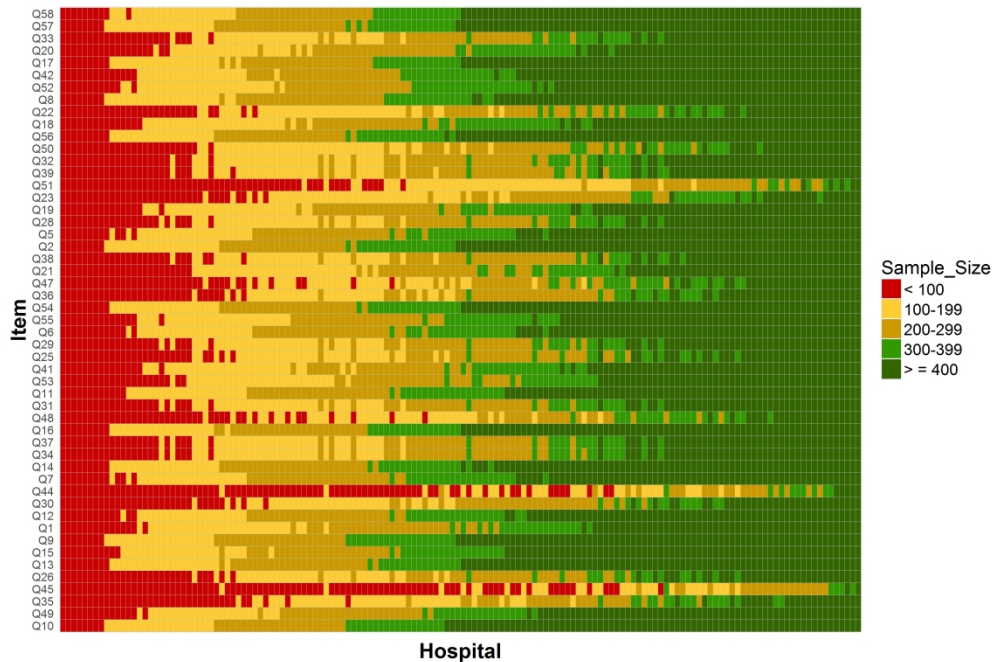

Figure 1 Sample sizes for each of the 146 hospitals included in the analysis by question (CPES 2016). Each rectangle corresponds to a single hospital and question. Its colour indicates one of five sample size categories as shown on the legend. The exact values for each cell in this plot are provided in supplementary material Table 1.

304x203mm (300 x 300 DPI)

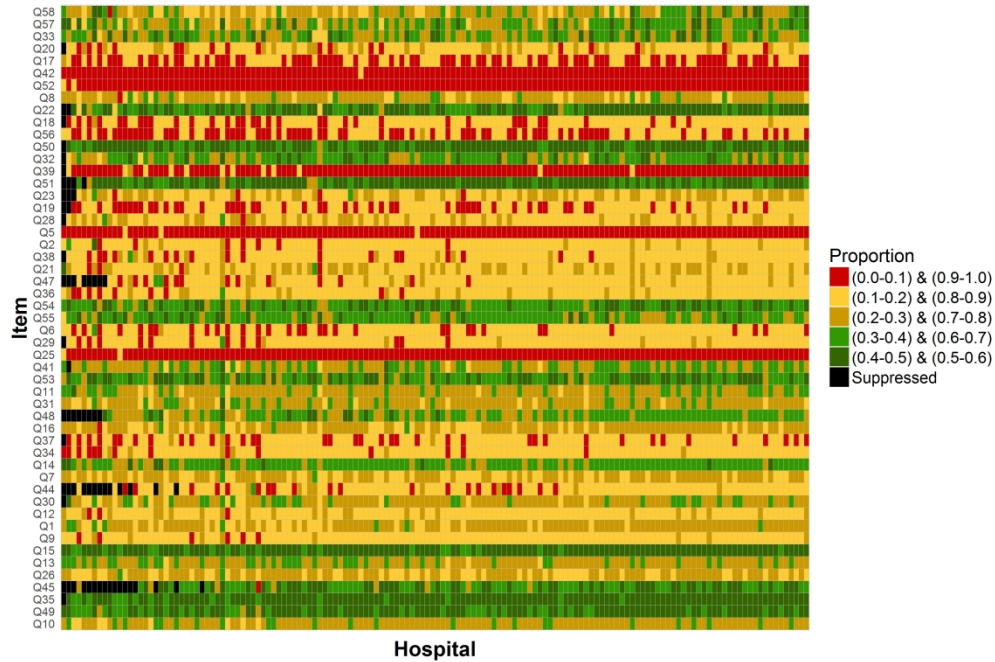

Figure 2 Proportions of patients reporting a positive experience by question and for each of the 146 hospitals included in the analysis (CPES 2016). Each rectangle corresponds to a single hospital and question. Its colour indicates one of five proportions categories as shown on the legend. The exact values for each cell in this plot are provided in supplementary material Table 2.

304x203mm (300 x 300 DPI)

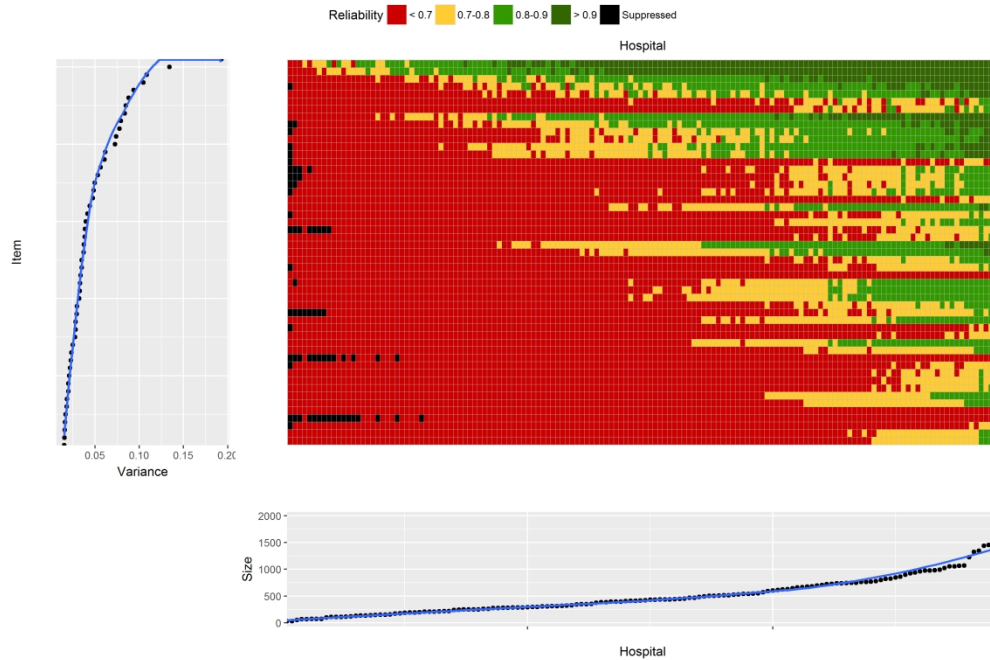

Figure 3 Main central grid: Reliability of hospital scores for each of the 146 hospitals included in the analysis (CPES 2016). Each rectangle corresponds to a single hospital and question. Its colour indicates one of four reliability categories as shown on the legend. Left hand side plot: The variance for each question on the log odds scale. The order of the questions has the same order than that of the main grid and is sorted from the question with lowest between hospital variance to the question with greatest between hospital variance. Bottom plot: The sample size for each hospital in terms of the total number of responders. The order of the hospitals has the same order than that of the main grid and is sorted from the hospital with the smallest sample size to the hospital with greatest sample size. The exact values for each cell in this plot are provided in the supplementary material Table 3.

304x203mm (300 x 300 DPI)



**Table 1.** Sample sizes by question for each of the 146 hospitals included in the analysis (CPES 2016).  
the cells in Figure 1.

| Questions | Hospitals |     |     |     |     |     |     |
|-----------|-----------|-----|-----|-----|-----|-----|-----|
|           | RQX       | RRJ | RT3 | RMP | RPC | REP | RAN |
| Q10       | 31        | 30  | 53  | 71  | 70  | 73  | 74  |
| Q49       | 22        | 27  | 44  | 62  | 54  | 68  | 63  |
| Q35       | 20        | 23  | 34  | 45  | 33  | 52  | 44  |
| Q45       | 6         | 6   | 1   | 22  | 6   | 13  | 17  |
| Q26       | 23        | 27  | 46  | 48  | 63  | 64  | 62  |
| Q13       | 29        | 30  | 44  | 65  | 61  | 67  | 66  |
| Q15       | 27        | 29  | 35  | 60  | 54  | 64  | 61  |
| Q9        | 30        | 31  | 53  | 69  | 68  | 71  | 73  |
| Q1        | 23        | 21  | 31  | 56  | 54  | 61  | 58  |
| Q12       | 29        | 23  | 45  | 65  | 54  | 64  | 58  |
| Q30       | 18        | 23  | 41  | 41  | 40  | 50  | 57  |
| Q44       | 8         | 6   | 2   | 22  | 7   | 15  | 18  |
| Q7        | 27        | 26  | 47  | 62  | 55  | 54  | 67  |
| Q14       | 29        | 31  | 47  | 67  | 64  | 68  | 66  |
| Q34       | 21        | 28  | 48  | 54  | 50  | 66  | 62  |
| Q37       | 20        | 28  | 48  | 53  | 50  | 66  | 63  |
| Q16       | 29        | 30  | 50  | 67  | 69  | 71  | 68  |
| Q48       | 5         | 1   | 2   | 20  | 6   | 15  | 6   |
| Q31       | 21        | 28  | 48  | 53  | 50  | 66  | 63  |
| Q11       | 29        | 28  | 37  | 60  | 57  | 65  | 61  |
| Q53       | 21        | 22  | 35  | 51  | 43  | 48  | 55  |
| Q41       | 23        | 19  | 28  | 51  | 40  | 47  | 51  |
| Q25       | 23        | 27  | 47  | 49  | 66  | 65  | 61  |
| Q29       | 20        | 28  | 49  | 55  | 50  | 64  | 63  |
| Q6        | 27        | 27  | 46  | 62  | 56  | 54  | 66  |
| Q55       | 24        | 28  | 38  | 49  | 57  | 54  | 50  |
| Q54       | 29        | 32  | 49  | 68  | 67  | 71  | 71  |
| Q36       | 21        | 26  | 44  | 50  | 45  | 63  | 58  |
| Q47       | 6         | 2   | 4   | 22  | 8   | 16  | 6   |
| Q21       | 24        | 23  | 33  | 53  | 38  | 44  | 44  |
| Q38       | 18        | 27  | 47  | 49  | 48  | 62  | 61  |
| Q2        | 31        | 32  | 50  | 70  | 70  | 72  | 71  |
| Q5        | 26        | 26  | 46  | 63  | 55  | 54  | 63  |
| Q28       | 20        | 28  | 49  | 54  | 49  | 65  | 63  |
| Q19       | 17        | 19  | 36  | 58  | 44  | 57  | 50  |
| Q23       | 18        | 14  | 20  | 39  | 23  | 23  | 32  |
| Q51       | 18        | 14  | 18  | 30  | 17  | 25  | 38  |
| Q39       | 19        | 28  | 44  | 53  | 47  | 64  | 56  |
| Q32       | 20        | 28  | 48  | 54  | 50  | 66  | 63  |
| Q50       | 19        | 23  | 24  | 59  | 29  | 38  | 53  |
| Q56       | 30        | 32  | 49  | 71  | 68  | 73  | 72  |
| Q18       | 18        | 21  | 38  | 62  | 48  | 60  | 55  |
| Q22       | 17        | 20  | 26  | 47  | 24  | 40  | 43  |
| Q8        | 26        | 30  | 47  | 67  | 69  | 71  | 68  |
| Q52       | 25        | 25  | 47  | 59  | 56  | 58  | 55  |

|    |            |    |    |    |    |    |    |    |
|----|------------|----|----|----|----|----|----|----|
| 1  |            |    |    |    |    |    |    |    |
| 2  | <b>Q42</b> | 23 | 21 | 33 | 61 | 61 | 54 | 60 |
| 3  | <b>Q17</b> | 29 | 27 | 47 | 68 | 67 | 70 | 68 |
| 4  | <b>Q20</b> | 19 | 24 | 34 | 61 | 45 | 57 | 51 |
| 5  | <b>Q33</b> | 21 | 28 | 48 | 54 | 49 | 66 | 62 |
| 6  | <b>Q57</b> | 29 | 32 | 48 | 69 | 66 | 73 | 71 |
| 7  | <b>Q58</b> | 29 | 26 | 49 | 66 | 64 | 69 | 70 |
| 8  |            |    |    |    |    |    |    |    |
| 9  |            |    |    |    |    |    |    |    |
| 10 |            |    |    |    |    |    |    |    |
| 11 |            |    |    |    |    |    |    |    |
| 12 |            |    |    |    |    |    |    |    |
| 13 |            |    |    |    |    |    |    |    |
| 14 |            |    |    |    |    |    |    |    |
| 15 |            |    |    |    |    |    |    |    |
| 16 |            |    |    |    |    |    |    |    |
| 17 |            |    |    |    |    |    |    |    |
| 18 |            |    |    |    |    |    |    |    |
| 19 |            |    |    |    |    |    |    |    |
| 20 |            |    |    |    |    |    |    |    |
| 21 |            |    |    |    |    |    |    |    |
| 22 |            |    |    |    |    |    |    |    |
| 23 |            |    |    |    |    |    |    |    |
| 24 |            |    |    |    |    |    |    |    |
| 25 |            |    |    |    |    |    |    |    |
| 26 |            |    |    |    |    |    |    |    |
| 27 |            |    |    |    |    |    |    |    |
| 28 |            |    |    |    |    |    |    |    |
| 29 |            |    |    |    |    |    |    |    |
| 30 |            |    |    |    |    |    |    |    |
| 31 |            |    |    |    |    |    |    |    |
| 32 |            |    |    |    |    |    |    |    |
| 33 |            |    |    |    |    |    |    |    |
| 34 |            |    |    |    |    |    |    |    |
| 35 |            |    |    |    |    |    |    |    |
| 36 |            |    |    |    |    |    |    |    |
| 37 |            |    |    |    |    |    |    |    |
| 38 |            |    |    |    |    |    |    |    |
| 39 |            |    |    |    |    |    |    |    |
| 40 |            |    |    |    |    |    |    |    |
| 41 |            |    |    |    |    |    |    |    |
| 42 |            |    |    |    |    |    |    |    |
| 43 |            |    |    |    |    |    |    |    |
| 44 |            |    |    |    |    |    |    |    |
| 45 |            |    |    |    |    |    |    |    |
| 46 |            |    |    |    |    |    |    |    |
| 47 |            |    |    |    |    |    |    |    |
| 48 |            |    |    |    |    |    |    |    |
| 49 |            |    |    |    |    |    |    |    |
| 50 |            |    |    |    |    |    |    |    |
| 51 |            |    |    |    |    |    |    |    |
| 52 |            |    |    |    |    |    |    |    |
| 53 |            |    |    |    |    |    |    |    |
| 54 |            |    |    |    |    |    |    |    |
| 55 |            |    |    |    |    |    |    |    |
| 56 |            |    |    |    |    |    |    |    |
| 57 |            |    |    |    |    |    |    |    |
| 58 |            |    |    |    |    |    |    |    |
| 59 |            |    |    |    |    |    |    |    |
| 60 |            |    |    |    |    |    |    |    |

For peer review only

These values correspond to

|    | <b>RGM</b> | <b>RBQ</b> | <b>R1F</b> | <b>RKE</b> | <b>RE9</b> | <b>RJ6</b> | <b>RVY</b> | <b>RA4</b> | <b>RJN</b> |
|----|------------|------------|------------|------------|------------|------------|------------|------------|------------|
| 10 | 75         | 101        | 107        | 110        | 112        | 115        | 118        | 133        | 134        |
| 11 | 70         | 84         | 83         | 86         | 88         | 89         | 88         | 102        | 97         |
| 12 | 33         | 59         | 49         | 50         | 44         | 50         | 35         | 52         | 43         |
| 13 | 16         | 15         | 16         | 20         | 14         | 19         | 11         | 19         | 33         |
| 14 | 48         | 79         | 69         | 57         | 46         | 68         | 52         | 74         | 76         |
| 15 | 62         | 95         | 101        | 106        | 110        | 108        | 116        | 127        | 131        |
| 16 | 57         | 89         | 94         | 94         | 100        | 101        | 102        | 115        | 124        |
| 17 | 75         | 100        | 108        | 105        | 110        | 112        | 118        | 131        | 133        |
| 18 | 45         | 71         | 70         | 89         | 82         | 79         | 92         | 104        | 83         |
| 19 | 66         | 87         | 93         | 99         | 100        | 96         | 99         | 110        | 115        |
| 20 | 48         | 70         | 61         | 49         | 53         | 64         | 42         | 60         | 50         |
| 21 | 16         | 16         | 20         | 22         | 16         | 22         | 12         | 22         | 36         |
| 22 | 73         | 80         | 100        | 86         | 96         | 103        | 94         | 117        | 108        |
| 23 | 67         | 96         | 103        | 103        | 106        | 109        | 112        | 123        | 130        |
| 24 | 53         | 83         | 75         | 57         | 57         | 76         | 51         | 79         | 66         |
| 25 | 53         | 83         | 75         | 57         | 57         | 76         | 52         | 79         | 66         |
| 26 | 70         | 99         | 102        | 106        | 108        | 106        | 112        | 128        | 131        |
| 27 | 11         | 21         | 28         | 55         | 52         | 40         | 44         | 60         | 62         |
| 28 | 53         | 82         | 75         | 56         | 57         | 76         | 51         | 78         | 65         |
| 29 | 64         | 85         | 94         | 95         | 97         | 103        | 103        | 114        | 120        |
| 30 | 51         | 73         | 71         | 81         | 84         | 75         | 83         | 82         | 98         |
| 31 | 48         | 64         | 76         | 79         | 92         | 82         | 83         | 94         | 103        |
| 32 | 49         | 80         | 68         | 56         | 46         | 70         | 51         | 74         | 78         |
| 33 | 53         | 83         | 75         | 56         | 56         | 75         | 52         | 78         | 66         |
| 34 | 73         | 80         | 99         | 84         | 94         | 103        | 95         | 118        | 108        |
| 35 | 62         | 77         | 92         | 79         | 87         | 76         | 94         | 101        | 105        |
| 36 | 75         | 97         | 102        | 101        | 109        | 107        | 117        | 129        | 130        |
| 37 | 50         | 76         | 66         | 52         | 50         | 58         | 44         | 64         | 56         |
| 38 | 14         | 20         | 31         | 59         | 60         | 43         | 53         | 65         | 68         |
| 39 | 45         | 67         | 67         | 86         | 78         | 64         | 76         | 78         | 77         |
| 40 | 52         | 79         | 70         | 51         | 53         | 69         | 44         | 71         | 59         |
| 41 | 72         | 102        | 107        | 110        | 108        | 112        | 117        | 129        | 131        |
| 42 | 73         | 81         | 101        | 87         | 96         | 101        | 95         | 118        | 106        |
| 43 | 53         | 81         | 75         | 55         | 56         | 73         | 52         | 79         | 66         |
| 44 | 56         | 73         | 82         | 94         | 95         | 71         | 78         | 84         | 101        |
| 45 | 22         | 37         | 39         | 60         | 49         | 44         | 45         | 56         | 55         |
| 46 | 22         | 56         | 36         | 37         | 33         | 35         | 37         | 27         | 35         |
| 47 | 51         | 81         | 71         | 54         | 55         | 69         | 47         | 76         | 64         |
| 48 | 53         | 82         | 75         | 57         | 57         | 75         | 50         | 78         | 65         |
| 49 | 35         | 77         | 62         | 60         | 60         | 56         | 60         | 42         | 71         |
| 50 | 75         | 99         | 105        | 105        | 109        | 107        | 120        | 132        | 133        |
| 51 | 63         | 78         | 86         | 98         | 94         | 73         | 82         | 97         | 107        |
| 52 | 37         | 58         | 58         | 63         | 72         | 48         | 56         | 69         | 49         |
| 53 | 70         | 100        | 100        | 105        | 104        | 106        | 109        | 125        | 125        |
| 54 | 65         | 83         | 85         | 90         | 100        | 101        | 89         | 115        | 110        |

|    |    |     |     |     |     |     |     |     |     |
|----|----|-----|-----|-----|-----|-----|-----|-----|-----|
| 1  |    |     |     |     |     |     |     |     |     |
| 2  | 59 | 79  | 87  | 94  | 97  | 94  | 94  | 115 | 125 |
| 3  | 74 | 98  | 105 | 109 | 106 | 100 | 110 | 129 | 127 |
| 4  | 50 | 73  | 84  | 92  | 87  | 75  | 87  | 86  | 93  |
| 5  | 53 | 81  | 75  | 57  | 57  | 74  | 49  | 78  | 65  |
| 6  | 74 | 100 | 103 | 105 | 109 | 109 | 117 | 131 | 130 |
| 7  | 70 | 97  | 105 | 102 | 104 | 98  | 120 | 124 | 127 |
| 8  |    |     |     |     |     |     |     |     |     |
| 9  |    |     |     |     |     |     |     |     |     |
| 10 |    |     |     |     |     |     |     |     |     |
| 11 |    |     |     |     |     |     |     |     |     |
| 12 |    |     |     |     |     |     |     |     |     |
| 13 |    |     |     |     |     |     |     |     |     |
| 14 |    |     |     |     |     |     |     |     |     |
| 15 |    |     |     |     |     |     |     |     |     |
| 16 |    |     |     |     |     |     |     |     |     |
| 17 |    |     |     |     |     |     |     |     |     |
| 18 |    |     |     |     |     |     |     |     |     |
| 19 |    |     |     |     |     |     |     |     |     |
| 20 |    |     |     |     |     |     |     |     |     |
| 21 |    |     |     |     |     |     |     |     |     |
| 22 |    |     |     |     |     |     |     |     |     |
| 23 |    |     |     |     |     |     |     |     |     |
| 24 |    |     |     |     |     |     |     |     |     |
| 25 |    |     |     |     |     |     |     |     |     |
| 26 |    |     |     |     |     |     |     |     |     |
| 27 |    |     |     |     |     |     |     |     |     |
| 28 |    |     |     |     |     |     |     |     |     |
| 29 |    |     |     |     |     |     |     |     |     |
| 30 |    |     |     |     |     |     |     |     |     |
| 31 |    |     |     |     |     |     |     |     |     |
| 32 |    |     |     |     |     |     |     |     |     |
| 33 |    |     |     |     |     |     |     |     |     |
| 34 |    |     |     |     |     |     |     |     |     |
| 35 |    |     |     |     |     |     |     |     |     |
| 36 |    |     |     |     |     |     |     |     |     |
| 37 |    |     |     |     |     |     |     |     |     |
| 38 |    |     |     |     |     |     |     |     |     |
| 39 |    |     |     |     |     |     |     |     |     |
| 40 |    |     |     |     |     |     |     |     |     |
| 41 |    |     |     |     |     |     |     |     |     |
| 42 |    |     |     |     |     |     |     |     |     |
| 43 |    |     |     |     |     |     |     |     |     |
| 44 |    |     |     |     |     |     |     |     |     |
| 45 |    |     |     |     |     |     |     |     |     |
| 46 |    |     |     |     |     |     |     |     |     |
| 47 |    |     |     |     |     |     |     |     |     |
| 48 |    |     |     |     |     |     |     |     |     |
| 49 |    |     |     |     |     |     |     |     |     |
| 50 |    |     |     |     |     |     |     |     |     |
| 51 |    |     |     |     |     |     |     |     |     |
| 52 |    |     |     |     |     |     |     |     |     |
| 53 |    |     |     |     |     |     |     |     |     |
| 54 |    |     |     |     |     |     |     |     |     |
| 55 |    |     |     |     |     |     |     |     |     |
| 56 |    |     |     |     |     |     |     |     |     |
| 57 |    |     |     |     |     |     |     |     |     |
| 58 |    |     |     |     |     |     |     |     |     |
| 59 |    |     |     |     |     |     |     |     |     |
| 60 |    |     |     |     |     |     |     |     |     |

For peer review only

1  
2  
3  
4  
5  
6  
7  
8  
9  
10  
11  
12  
13  
14  
15  
16  
17  
18  
19  
20  
21  
22  
23  
24  
25  
26  
27  
28  
29  
30  
31  
32  
33  
34  
35  
36  
37  
38  
39  
40  
41  
42  
43  
44  
45  
46  
47  
48  
49  
50  
51  
52  
53  
54  
55  
56  
57  
58  
59  
60

| <b>RAS</b> | <b>RFR</b> | <b>RAX</b> | <b>RWW</b> | <b>RM3</b> | <b>RQM</b> | <b>RVR</b> | <b>RJR</b> | <b>RC1</b> |
|------------|------------|------------|------------|------------|------------|------------|------------|------------|
| 137        | 138        | 143        | 149        | 150        | 157        | 170        | 175        | 187        |
| 111        | 121        | 113        | 114        | 133        | 112        | 120        | 130        | 136        |
| 60         | 67         | 62         | 62         | 90         | 62         | 55         | 61         | 85         |
| 25         | 24         | 15         | 24         | 29         | 32         | 12         | 25         | 35         |
| 71         | 72         | 92         | 77         | 92         | 70         | 66         | 82         | 129        |
| 128        | 132        | 132        | 136        | 146        | 149        | 154        | 163        | 179        |
| 121        | 122        | 112        | 129        | 132        | 134        | 139        | 150        | 160        |
| 136        | 137        | 142        | 147        | 146        | 154        | 166        | 172        | 187        |
| 101        | 104        | 108        | 105        | 102        | 110        | 128        | 127        | 133        |
| 113        | 117        | 116        | 120        | 130        | 140        | 136        | 156        | 158        |
| 67         | 68         | 78         | 77         | 97         | 61         | 76         | 76         | 100        |
| 28         | 27         | 18         | 28         | 36         | 36         | 15         | 30         | 41         |
| 115        | 117        | 125        | 126        | 128        | 128        | 135        | 155        | 165        |
| 128        | 133        | 132        | 135        | 143        | 144        | 155        | 164        | 174        |
| 79         | 83         | 100        | 89         | 112        | 88         | 83         | 89         | 119        |
| 79         | 81         | 100        | 88         | 112        | 87         | 83         | 89         | 119        |
| 133        | 134        | 133        | 143        | 145        | 150        | 154        | 166        | 179        |
| 56         | 54         | 49         | 36         | 49         | 73         | 57         | 61         | 58         |
| 79         | 83         | 100        | 89         | 110        | 87         | 82         | 89         | 117        |
| 128        | 122        | 122        | 129        | 121        | 138        | 147        | 155        | 167        |
| 87         | 85         | 92         | 94         | 106        | 98         | 92         | 113        | 128        |
| 102        | 109        | 98         | 106        | 106        | 117        | 109        | 110        | 139        |
| 71         | 72         | 94         | 80         | 93         | 71         | 64         | 82         | 130        |
| 78         | 83         | 100        | 89         | 112        | 87         | 83         | 88         | 118        |
| 116        | 116        | 122        | 128        | 128        | 130        | 133        | 157        | 163        |
| 108        | 111        | 96         | 111        | 114        | 110        | 118        | 134        | 149        |
| 128        | 129        | 134        | 140        | 140        | 150        | 161        | 169        | 176        |
| 65         | 75         | 77         | 77         | 95         | 73         | 67         | 69         | 104        |
| 60         | 58         | 53         | 40         | 55         | 77         | 61         | 68         | 65         |
| 81         | 84         | 68         | 86         | 90         | 93         | 85         | 92         | 105        |
| 73         | 79         | 96         | 84         | 105        | 76         | 76         | 83         | 112        |
| 135        | 136        | 144        | 151        | 148        | 154        | 161        | 172        | 184        |
| 114        | 117        | 124        | 125        | 129        | 124        | 129        | 156        | 165        |
| 79         | 83         | 100        | 89         | 111        | 87         | 82         | 87         | 117        |
| 105        | 114        | 97         | 105        | 114        | 111        | 134        | 131        | 122        |
| 59         | 57         | 53         | 63         | 62         | 70         | 51         | 54         | 67         |
| 38         | 51         | 36         | 40         | 64         | 43         | 35         | 44         | 45         |
| 76         | 83         | 95         | 86         | 106        | 79         | 79         | 86         | 111        |
| 79         | 81         | 99         | 86         | 111        | 88         | 83         | 89         | 119        |
| 64         | 85         | 56         | 85         | 92         | 73         | 66         | 74         | 78         |
| 137        | 135        | 145        | 145        | 147        | 156        | 163        | 171        | 181        |
| 108        | 125        | 108        | 111        | 116        | 115        | 140        | 133        | 122        |
| 66         | 79         | 45         | 77         | 86         | 68         | 54         | 63         | 80         |
| 130        | 133        | 124        | 140        | 138        | 139        | 158        | 163        | 170        |
| 115        | 110        | 116        | 111        | 135        | 136        | 130        | 139        | 157        |

|    |     |     |     |     |     |     |     |     |     |
|----|-----|-----|-----|-----|-----|-----|-----|-----|-----|
| 1  |     |     |     |     |     |     |     |     |     |
| 2  | 113 | 117 | 115 | 123 | 121 | 136 | 141 | 144 | 162 |
| 3  | 131 | 138 | 132 | 137 | 142 | 149 | 159 | 164 | 172 |
| 4  | 99  | 100 | 92  | 97  | 113 | 110 | 106 | 111 | 121 |
| 5  | 79  | 83  | 96  | 88  | 110 | 86  | 82  | 88  | 119 |
| 6  | 135 | 135 | 141 | 146 | 145 | 152 | 163 | 173 | 181 |
| 7  | 129 | 132 | 135 | 145 | 133 | 145 | 153 | 164 | 175 |
| 8  |     |     |     |     |     |     |     |     |     |
| 9  |     |     |     |     |     |     |     |     |     |
| 10 |     |     |     |     |     |     |     |     |     |
| 11 |     |     |     |     |     |     |     |     |     |
| 12 |     |     |     |     |     |     |     |     |     |
| 13 |     |     |     |     |     |     |     |     |     |
| 14 |     |     |     |     |     |     |     |     |     |
| 15 |     |     |     |     |     |     |     |     |     |
| 16 |     |     |     |     |     |     |     |     |     |
| 17 |     |     |     |     |     |     |     |     |     |
| 18 |     |     |     |     |     |     |     |     |     |
| 19 |     |     |     |     |     |     |     |     |     |
| 20 |     |     |     |     |     |     |     |     |     |
| 21 |     |     |     |     |     |     |     |     |     |
| 22 |     |     |     |     |     |     |     |     |     |
| 23 |     |     |     |     |     |     |     |     |     |
| 24 |     |     |     |     |     |     |     |     |     |
| 25 |     |     |     |     |     |     |     |     |     |
| 26 |     |     |     |     |     |     |     |     |     |
| 27 |     |     |     |     |     |     |     |     |     |
| 28 |     |     |     |     |     |     |     |     |     |
| 29 |     |     |     |     |     |     |     |     |     |
| 30 |     |     |     |     |     |     |     |     |     |
| 31 |     |     |     |     |     |     |     |     |     |
| 32 |     |     |     |     |     |     |     |     |     |
| 33 |     |     |     |     |     |     |     |     |     |
| 34 |     |     |     |     |     |     |     |     |     |
| 35 |     |     |     |     |     |     |     |     |     |
| 36 |     |     |     |     |     |     |     |     |     |
| 37 |     |     |     |     |     |     |     |     |     |
| 38 |     |     |     |     |     |     |     |     |     |
| 39 |     |     |     |     |     |     |     |     |     |
| 40 |     |     |     |     |     |     |     |     |     |
| 41 |     |     |     |     |     |     |     |     |     |
| 42 |     |     |     |     |     |     |     |     |     |
| 43 |     |     |     |     |     |     |     |     |     |
| 44 |     |     |     |     |     |     |     |     |     |
| 45 |     |     |     |     |     |     |     |     |     |
| 46 |     |     |     |     |     |     |     |     |     |
| 47 |     |     |     |     |     |     |     |     |     |
| 48 |     |     |     |     |     |     |     |     |     |
| 49 |     |     |     |     |     |     |     |     |     |
| 50 |     |     |     |     |     |     |     |     |     |
| 51 |     |     |     |     |     |     |     |     |     |
| 52 |     |     |     |     |     |     |     |     |     |
| 53 |     |     |     |     |     |     |     |     |     |
| 54 |     |     |     |     |     |     |     |     |     |
| 55 |     |     |     |     |     |     |     |     |     |
| 56 |     |     |     |     |     |     |     |     |     |
| 57 |     |     |     |     |     |     |     |     |     |
| 58 |     |     |     |     |     |     |     |     |     |
| 59 |     |     |     |     |     |     |     |     |     |
| 60 |     |     |     |     |     |     |     |     |     |

For peer review only

1  
2  
3  
4  
5  
6  
7  
8  
9  
10  
11  
12  
13  
14  
15  
16  
17  
18  
19  
20  
21  
22  
23  
24  
25  
26  
27  
28  
29  
30  
31  
32  
33  
34  
35  
36  
37  
38  
39  
40  
41  
42  
43  
44  
45  
46  
47  
48  
49  
50  
51  
52  
53  
54  
55  
56  
57  
58  
59  
60

| <b>RFF</b> | <b>RJ2</b> | <b>RA3</b> | <b>RBT</b> | <b>REN</b> | <b>RRF</b> | <b>RAP</b> | <b>RMC</b> | <b>RLQ</b> |
|------------|------------|------------|------------|------------|------------|------------|------------|------------|
| 189        | 191        | 197        | 209        | 208        | 209        | 208        | 214        | 213        |
| 150        | 157        | 150        | 168        | 170        | 161        | 180        | 170        | 169        |
| 84         | 87         | 57         | 74         | 89         | 81         | 80         | 101        | 68         |
| 27         | 33         | 20         | 22         | 135        | 25         | 77         | 36         | 43         |
| 99         | 96         | 94         | 119        | 59         | 119        | 88         | 138        | 109        |
| 168        | 187        | 182        | 197        | 204        | 196        | 203        | 205        | 204        |
| 148        | 179        | 177        | 184        | 201        | 173        | 188        | 184        | 185        |
| 187        | 191        | 190        | 205        | 204        | 205        | 208        | 211        | 213        |
| 137        | 145        | 150        | 154        | 173        | 146        | 134        | 134        | 165        |
| 159        | 176        | 157        | 171        | 183        | 181        | 180        | 192        | 190        |
| 93         | 91         | 72         | 93         | 94         | 101        | 95         | 116        | 82         |
| 28         | 36         | 27         | 25         | 160        | 30         | 81         | 51         | 49         |
| 154        | 164        | 163        | 185        | 178        | 177        | 167        | 189        | 160        |
| 173        | 188        | 186        | 194        | 201        | 201        | 203        | 204        | 200        |
| 118        | 106        | 91         | 109        | 110        | 120        | 106        | 139        | 102        |
| 118        | 106        | 88         | 111        | 110        | 123        | 106        | 139        | 102        |
| 174        | 189        | 188        | 202        | 203        | 192        | 203        | 203        | 212        |
| 76         | 117        | 94         | 66         | 88         | 72         | 132        | 64         | 74         |
| 118        | 107        | 90         | 111        | 110        | 121        | 106        | 139        | 102        |
| 158        | 177        | 168        | 181        | 177        | 183        | 187        | 191        | 187        |
| 117        | 133        | 117        | 125        | 158        | 137        | 155        | 137        | 149        |
| 129        | 146        | 140        | 142        | 169        | 150        | 159        | 162        | 147        |
| 102        | 95         | 94         | 122        | 57         | 123        | 86         | 139        | 112        |
| 118        | 107        | 91         | 111        | 110        | 121        | 108        | 140        | 102        |
| 152        | 164        | 164        | 185        | 175        | 175        | 169        | 190        | 161        |
| 143        | 138        | 144        | 154        | 167        | 171        | 168        | 159        | 166        |
| 180        | 180        | 186        | 199        | 202        | 202        | 202        | 205        | 215        |
| 88         | 95         | 81         | 98         | 95         | 110        | 86         | 120        | 88         |
| 82         | 125        | 97         | 73         | 95         | 83         | 145        | 75         | 83         |
| 114        | 140        | 115        | 121        | 152        | 127        | 156        | 145        | 131        |
| 105        | 98         | 82         | 104        | 102        | 112        | 100        | 133        | 95         |
| 182        | 191        | 192        | 199        | 205        | 205        | 210        | 214        | 214        |
| 151        | 159        | 165        | 185        | 174        | 176        | 167        | 187        | 164        |
| 118        | 107        | 89         | 110        | 109        | 118        | 107        | 139        | 102        |
| 126        | 147        | 142        | 156        | 159        | 143        | 179        | 158        | 150        |
| 79         | 103        | 78         | 80         | 84         | 77         | 129        | 75         | 86         |
| 68         | 62         | 50         | 64         | 97         | 62         | 89         | 63         | 62         |
| 112        | 105        | 89         | 102        | 107        | 115        | 99         | 137        | 100        |
| 118        | 107        | 90         | 110        | 110        | 120        | 105        | 138        | 101        |
| 108        | 105        | 68         | 112        | 114        | 119        | 131        | 109        | 126        |
| 185        | 189        | 192        | 203        | 208        | 206        | 208        | 213        | 219        |
| 136        | 152        | 147        | 163        | 159        | 148        | 178        | 159        | 156        |
| 109        | 119        | 99         | 94         | 119        | 107        | 142        | 105        | 99         |
| 175        | 178        | 177        | 191        | 200        | 198        | 194        | 207        | 200        |
| 140        | 168        | 152        | 169        | 167        | 173        | 188        | 173        | 166        |

|    |     |     |     |     |     |     |     |     |     |
|----|-----|-----|-----|-----|-----|-----|-----|-----|-----|
| 1  |     |     |     |     |     |     |     |     |     |
| 2  | 153 | 174 | 173 | 172 | 192 | 177 | 179 | 188 | 190 |
| 3  | 171 | 187 | 193 | 197 | 201 | 191 | 204 | 198 | 207 |
| 4  | 126 | 134 | 150 | 138 | 173 | 145 | 169 | 165 | 153 |
| 5  | 113 | 104 | 90  | 110 | 110 | 119 | 105 | 139 | 100 |
| 6  | 181 | 189 | 191 | 204 | 207 | 207 | 212 | 212 | 219 |
| 7  | 179 | 184 | 180 | 199 | 198 | 196 | 199 | 200 | 210 |
| 8  |     |     |     |     |     |     |     |     |     |
| 9  |     |     |     |     |     |     |     |     |     |
| 10 |     |     |     |     |     |     |     |     |     |
| 11 |     |     |     |     |     |     |     |     |     |
| 12 |     |     |     |     |     |     |     |     |     |
| 13 |     |     |     |     |     |     |     |     |     |
| 14 |     |     |     |     |     |     |     |     |     |
| 15 |     |     |     |     |     |     |     |     |     |
| 16 |     |     |     |     |     |     |     |     |     |
| 17 |     |     |     |     |     |     |     |     |     |
| 18 |     |     |     |     |     |     |     |     |     |
| 19 |     |     |     |     |     |     |     |     |     |
| 20 |     |     |     |     |     |     |     |     |     |
| 21 |     |     |     |     |     |     |     |     |     |
| 22 |     |     |     |     |     |     |     |     |     |
| 23 |     |     |     |     |     |     |     |     |     |
| 24 |     |     |     |     |     |     |     |     |     |
| 25 |     |     |     |     |     |     |     |     |     |
| 26 |     |     |     |     |     |     |     |     |     |
| 27 |     |     |     |     |     |     |     |     |     |
| 28 |     |     |     |     |     |     |     |     |     |
| 29 |     |     |     |     |     |     |     |     |     |
| 30 |     |     |     |     |     |     |     |     |     |
| 31 |     |     |     |     |     |     |     |     |     |
| 32 |     |     |     |     |     |     |     |     |     |
| 33 |     |     |     |     |     |     |     |     |     |
| 34 |     |     |     |     |     |     |     |     |     |
| 35 |     |     |     |     |     |     |     |     |     |
| 36 |     |     |     |     |     |     |     |     |     |
| 37 |     |     |     |     |     |     |     |     |     |
| 38 |     |     |     |     |     |     |     |     |     |
| 39 |     |     |     |     |     |     |     |     |     |
| 40 |     |     |     |     |     |     |     |     |     |
| 41 |     |     |     |     |     |     |     |     |     |
| 42 |     |     |     |     |     |     |     |     |     |
| 43 |     |     |     |     |     |     |     |     |     |
| 44 |     |     |     |     |     |     |     |     |     |
| 45 |     |     |     |     |     |     |     |     |     |
| 46 |     |     |     |     |     |     |     |     |     |
| 47 |     |     |     |     |     |     |     |     |     |
| 48 |     |     |     |     |     |     |     |     |     |
| 49 |     |     |     |     |     |     |     |     |     |
| 50 |     |     |     |     |     |     |     |     |     |
| 51 |     |     |     |     |     |     |     |     |     |
| 52 |     |     |     |     |     |     |     |     |     |
| 53 |     |     |     |     |     |     |     |     |     |
| 54 |     |     |     |     |     |     |     |     |     |
| 55 |     |     |     |     |     |     |     |     |     |
| 56 |     |     |     |     |     |     |     |     |     |
| 57 |     |     |     |     |     |     |     |     |     |
| 58 |     |     |     |     |     |     |     |     |     |
| 59 |     |     |     |     |     |     |     |     |     |
| 60 |     |     |     |     |     |     |     |     |     |

For peer review only



1  
2  
3  
4  
5  
6  
7  
8  
9  
10  
11  
12  
13  
14  
15  
16  
17  
18  
19  
20  
21  
22  
23  
24  
25  
26  
27  
28  
29  
30  
31  
32  
33  
34  
35  
36  
37  
38  
39  
40  
41  
42  
43  
44  
45  
46  
47  
48  
49  
50  
51  
52  
53  
54  
55  
56  
57  
58  
59  
60

| RLT | RDZ | RBK | RQQ | RBN | RDD | RFS | RTK | RCF |
|-----|-----|-----|-----|-----|-----|-----|-----|-----|
| 241 | 243 | 247 | 247 | 249 | 248 | 254 | 257 | 272 |
| 198 | 190 | 200 | 197 | 197 | 185 | 202 | 203 | 215 |
| 88  | 125 | 125 | 80  | 129 | 108 | 115 | 95  | 114 |
| 58  | 52  | 43  | 31  | 21  | 30  | 39  | 25  | 40  |
| 106 | 196 | 134 | 109 | 195 | 118 | 132 | 133 | 132 |
| 231 | 232 | 234 | 234 | 224 | 238 | 244 | 236 | 262 |
| 214 | 208 | 225 | 217 | 196 | 217 | 218 | 225 | 234 |
| 232 | 237 | 242 | 245 | 248 | 248 | 253 | 255 | 265 |
| 184 | 177 | 164 | 197 | 195 | 170 | 186 | 175 | 213 |
| 205 | 219 | 214 | 213 | 211 | 212 | 216 | 218 | 230 |
| 102 | 138 | 135 | 99  | 158 | 117 | 125 | 125 | 128 |
| 67  | 54  | 48  | 38  | 26  | 33  | 45  | 31  | 50  |
| 201 | 217 | 219 | 208 | 215 | 204 | 212 | 211 | 233 |
| 228 | 232 | 232 | 232 | 231 | 231 | 238 | 238 | 259 |
| 121 | 179 | 155 | 118 | 187 | 141 | 153 | 145 | 165 |
| 122 | 179 | 154 | 118 | 190 | 141 | 152 | 144 | 166 |
| 228 | 240 | 235 | 234 | 232 | 236 | 241 | 251 | 263 |
| 134 | 87  | 134 | 119 | 57  | 103 | 102 | 91  | 149 |
| 122 | 179 | 154 | 120 | 187 | 143 | 153 | 145 | 166 |
| 207 | 207 | 211 | 213 | 207 | 219 | 222 | 228 | 227 |
| 158 | 146 | 162 | 177 | 163 | 151 | 162 | 160 | 167 |
| 192 | 173 | 185 | 185 | 174 | 184 | 193 | 160 | 213 |
| 104 | 194 | 135 | 111 | 197 | 117 | 132 | 135 | 136 |
| 122 | 180 | 155 | 118 | 188 | 142 | 153 | 145 | 165 |
| 198 | 218 | 216 | 208 | 217 | 206 | 211 | 207 | 230 |
| 174 | 196 | 183 | 192 | 186 | 197 | 190 | 199 | 206 |
| 228 | 233 | 232 | 239 | 236 | 234 | 240 | 250 | 259 |
| 104 | 157 | 139 | 105 | 165 | 121 | 136 | 121 | 134 |
| 140 | 94  | 148 | 134 | 64  | 109 | 111 | 104 | 167 |
| 163 | 145 | 169 | 152 | 142 | 158 | 147 | 154 | 166 |
| 114 | 172 | 146 | 108 | 180 | 131 | 144 | 131 | 151 |
| 236 | 241 | 244 | 241 | 250 | 242 | 255 | 252 | 271 |
| 197 | 216 | 216 | 207 | 217 | 200 | 209 | 206 | 226 |
| 120 | 179 | 153 | 119 | 188 | 142 | 151 | 145 | 165 |
| 192 | 191 | 178 | 198 | 169 | 164 | 157 | 190 | 172 |
| 113 | 95  | 131 | 90  | 104 | 104 | 111 | 107 | 111 |
| 64  | 72  | 72  | 74  | 77  | 83  | 87  | 70  | 94  |
| 116 | 177 | 150 | 110 | 183 | 131 | 144 | 138 | 156 |
| 122 | 179 | 155 | 118 | 188 | 143 | 152 | 144 | 163 |
| 102 | 133 | 120 | 140 | 132 | 131 | 148 | 114 | 159 |
| 233 | 242 | 245 | 242 | 244 | 244 | 250 | 256 | 272 |
| 193 | 194 | 189 | 197 | 181 | 177 | 165 | 200 | 185 |
| 132 | 97  | 168 | 129 | 123 | 123 | 115 | 107 | 132 |
| 226 | 234 | 229 | 228 | 231 | 231 | 233 | 242 | 244 |
| 187 | 196 | 183 | 197 | 195 | 206 | 189 | 214 | 205 |

|    |     |     |     |     |     |     |     |     |     |
|----|-----|-----|-----|-----|-----|-----|-----|-----|-----|
| 1  |     |     |     |     |     |     |     |     |     |
| 2  | 212 | 201 | 210 | 222 | 204 | 196 | 218 | 204 | 250 |
| 3  | 231 | 240 | 235 | 235 | 232 | 227 | 235 | 245 | 254 |
| 4  | 170 | 174 | 209 | 179 | 167 | 176 | 174 | 172 | 215 |
| 5  | 119 | 177 | 153 | 118 | 186 | 140 | 153 | 145 | 163 |
| 6  | 234 | 241 | 240 | 241 | 243 | 239 | 250 | 256 | 268 |
| 7  | 227 | 235 | 235 | 234 | 231 | 232 | 243 | 247 | 259 |
| 8  |     |     |     |     |     |     |     |     |     |
| 9  |     |     |     |     |     |     |     |     |     |
| 10 |     |     |     |     |     |     |     |     |     |
| 11 |     |     |     |     |     |     |     |     |     |
| 12 |     |     |     |     |     |     |     |     |     |
| 13 |     |     |     |     |     |     |     |     |     |
| 14 |     |     |     |     |     |     |     |     |     |
| 15 |     |     |     |     |     |     |     |     |     |
| 16 |     |     |     |     |     |     |     |     |     |
| 17 |     |     |     |     |     |     |     |     |     |
| 18 |     |     |     |     |     |     |     |     |     |
| 19 |     |     |     |     |     |     |     |     |     |
| 20 |     |     |     |     |     |     |     |     |     |
| 21 |     |     |     |     |     |     |     |     |     |
| 22 |     |     |     |     |     |     |     |     |     |
| 23 |     |     |     |     |     |     |     |     |     |
| 24 |     |     |     |     |     |     |     |     |     |
| 25 |     |     |     |     |     |     |     |     |     |
| 26 |     |     |     |     |     |     |     |     |     |
| 27 |     |     |     |     |     |     |     |     |     |
| 28 |     |     |     |     |     |     |     |     |     |
| 29 |     |     |     |     |     |     |     |     |     |
| 30 |     |     |     |     |     |     |     |     |     |
| 31 |     |     |     |     |     |     |     |     |     |
| 32 |     |     |     |     |     |     |     |     |     |
| 33 |     |     |     |     |     |     |     |     |     |
| 34 |     |     |     |     |     |     |     |     |     |
| 35 |     |     |     |     |     |     |     |     |     |
| 36 |     |     |     |     |     |     |     |     |     |
| 37 |     |     |     |     |     |     |     |     |     |
| 38 |     |     |     |     |     |     |     |     |     |
| 39 |     |     |     |     |     |     |     |     |     |
| 40 |     |     |     |     |     |     |     |     |     |
| 41 |     |     |     |     |     |     |     |     |     |
| 42 |     |     |     |     |     |     |     |     |     |
| 43 |     |     |     |     |     |     |     |     |     |
| 44 |     |     |     |     |     |     |     |     |     |
| 45 |     |     |     |     |     |     |     |     |     |
| 46 |     |     |     |     |     |     |     |     |     |
| 47 |     |     |     |     |     |     |     |     |     |
| 48 |     |     |     |     |     |     |     |     |     |
| 49 |     |     |     |     |     |     |     |     |     |
| 50 |     |     |     |     |     |     |     |     |     |
| 51 |     |     |     |     |     |     |     |     |     |
| 52 |     |     |     |     |     |     |     |     |     |
| 53 |     |     |     |     |     |     |     |     |     |
| 54 |     |     |     |     |     |     |     |     |     |
| 55 |     |     |     |     |     |     |     |     |     |
| 56 |     |     |     |     |     |     |     |     |     |
| 57 |     |     |     |     |     |     |     |     |     |
| 58 |     |     |     |     |     |     |     |     |     |
| 59 |     |     |     |     |     |     |     |     |     |
| 60 |     |     |     |     |     |     |     |     |     |

For peer review only

1  
2  
3  
4  
5  
6  
7  
8  
9  
10  
11  
12  
13  
14  
15  
16  
17  
18  
19  
20  
21  
22  
23  
24  
25  
26  
27  
28  
29  
30  
31  
32  
33  
34  
35  
36  
37  
38  
39  
40  
41  
42  
43  
44  
45  
46  
47  
48  
49  
50  
51  
52  
53  
54  
55  
56  
57  
58  
59  
60

| <b>RWG</b> | <b>REM</b> | <b>RJF</b> | <b>RQW</b> | <b>RCB</b> | <b>RF4</b> | <b>RK5</b> | <b>RCD</b> | <b>RBZ</b> |
|------------|------------|------------|------------|------------|------------|------------|------------|------------|
| 274        | 279        | 274        | 282        | 285        | 282        | 290        | 294        | 296        |
| 210        | 224        | 223        | 227        | 228        | 216        | 234        | 229        | 229        |
| 118        | 142        | 129        | 120        | 162        | 136        | 155        | 116        | 120        |
| 35         | 68         | 40         | 41         | 46         | 115        | 36         | 47         | 46         |
| 182        | 176        | 155        | 144        | 211        | 171        | 193        | 144        | 162        |
| 245        | 267        | 262        | 272        | 276        | 271        | 275        | 281        | 278        |
| 217        | 254        | 244        | 239        | 252        | 259        | 250        | 248        | 259        |
| 270        | 271        | 272        | 280        | 284        | 278        | 283        | 293        | 288        |
| 193        | 176        | 210        | 224        | 219        | 192        | 221        | 204        | 247        |
| 234        | 246        | 236        | 241        | 252        | 244        | 249        | 259        | 249        |
| 149        | 161        | 148        | 140        | 184        | 148        | 170        | 130        | 147        |
| 39         | 81         | 49         | 51         | 52         | 128        | 41         | 55         | 59         |
| 235        | 243        | 245        | 258        | 257        | 256        | 264        | 256        | 251        |
| 250        | 259        | 261        | 265        | 273        | 270        | 276        | 278        | 279        |
| 183        | 191        | 179        | 170        | 228        | 182        | 209        | 160        | 170        |
| 187        | 191        | 178        | 168        | 229        | 181        | 209        | 159        | 171        |
| 256        | 272        | 270        | 264        | 280        | 277        | 279        | 288        | 280        |
| 65         | 79         | 146        | 129        | 121        | 128        | 94         | 118        | 154        |
| 185        | 191        | 179        | 171        | 227        | 183        | 207        | 160        | 171        |
| 240        | 231        | 246        | 256        | 256        | 243        | 260        | 246        | 252        |
| 182        | 176        | 192        | 185        | 193        | 168        | 190        | 203        | 236        |
| 168        | 195        | 212        | 217        | 203        | 211        | 208        | 210        | 189        |
| 183        | 181        | 156        | 141        | 213        | 171        | 195        | 145        | 160        |
| 186        | 191        | 179        | 167        | 229        | 183        | 208        | 160        | 170        |
| 235        | 242        | 244        | 255        | 255        | 254        | 261        | 257        | 249        |
| 205        | 203        | 211        | 220        | 222        | 215        | 233        | 213        | 230        |
| 260        | 265        | 269        | 277        | 278        | 271        | 277        | 278        | 285        |
| 163        | 164        | 152        | 138        | 210        | 153        | 187        | 138        | 155        |
| 76         | 93         | 161        | 157        | 132        | 144        | 106        | 133        | 162        |
| 157        | 181        | 183        | 173        | 183        | 187        | 165        | 186        | 178        |
| 176        | 179        | 170        | 160        | 220        | 170        | 194        | 149        | 160        |
| 270        | 273        | 273        | 282        | 283        | 284        | 292        | 289        | 291        |
| 234        | 240        | 244        | 255        | 254        | 250        | 263        | 259        | 248        |
| 184        | 190        | 177        | 171        | 228        | 181        | 208        | 160        | 171        |
| 200        | 198        | 186        | 213        | 212        | 220        | 213        | 233        | 222        |
| 111        | 107        | 124        | 117        | 131        | 160        | 121        | 140        | 117        |
| 82         | 101        | 81         | 70         | 83         | 101        | 71         | 91         | 87         |
| 176        | 188        | 165        | 162        | 224        | 173        | 201        | 156        | 170        |
| 185        | 190        | 179        | 171        | 227        | 182        | 206        | 159        | 168        |
| 139        | 169        | 153        | 146        | 136        | 153        | 133        | 166        | 152        |
| 270        | 273        | 270        | 281        | 285        | 283        | 285        | 293        | 290        |
| 210        | 210        | 193        | 228        | 223        | 232        | 219        | 247        | 236        |
| 113        | 165        | 150        | 137        | 137        | 161        | 146        | 153        | 128        |
| 254        | 255        | 263        | 262        | 266        | 270        | 278        | 274        | 267        |
| 239        | 222        | 251        | 251        | 238        | 225        | 243        | 243        | 267        |

|    |     |     |     |     |     |     |     |     |     |
|----|-----|-----|-----|-----|-----|-----|-----|-----|-----|
| 1  |     |     |     |     |     |     |     |     |     |
| 2  | 204 | 245 | 240 | 263 | 233 | 251 | 246 | 254 | 251 |
| 3  | 262 | 266 | 261 | 264 | 272 | 279 | 283 | 286 | 279 |
| 4  | 198 | 202 | 185 | 203 | 211 | 203 | 205 | 228 | 200 |
| 5  | 185 | 191 | 177 | 167 | 225 | 181 | 208 | 158 | 170 |
| 6  | 264 | 274 | 269 | 282 | 284 | 276 | 286 | 290 | 292 |
| 7  | 259 | 260 | 262 | 269 | 274 | 272 | 275 | 271 | 282 |
| 8  |     |     |     |     |     |     |     |     |     |
| 9  |     |     |     |     |     |     |     |     |     |
| 10 |     |     |     |     |     |     |     |     |     |
| 11 |     |     |     |     |     |     |     |     |     |
| 12 |     |     |     |     |     |     |     |     |     |
| 13 |     |     |     |     |     |     |     |     |     |
| 14 |     |     |     |     |     |     |     |     |     |
| 15 |     |     |     |     |     |     |     |     |     |
| 16 |     |     |     |     |     |     |     |     |     |
| 17 |     |     |     |     |     |     |     |     |     |
| 18 |     |     |     |     |     |     |     |     |     |
| 19 |     |     |     |     |     |     |     |     |     |
| 20 |     |     |     |     |     |     |     |     |     |
| 21 |     |     |     |     |     |     |     |     |     |
| 22 |     |     |     |     |     |     |     |     |     |
| 23 |     |     |     |     |     |     |     |     |     |
| 24 |     |     |     |     |     |     |     |     |     |
| 25 |     |     |     |     |     |     |     |     |     |
| 26 |     |     |     |     |     |     |     |     |     |
| 27 |     |     |     |     |     |     |     |     |     |
| 28 |     |     |     |     |     |     |     |     |     |
| 29 |     |     |     |     |     |     |     |     |     |
| 30 |     |     |     |     |     |     |     |     |     |
| 31 |     |     |     |     |     |     |     |     |     |
| 32 |     |     |     |     |     |     |     |     |     |
| 33 |     |     |     |     |     |     |     |     |     |
| 34 |     |     |     |     |     |     |     |     |     |
| 35 |     |     |     |     |     |     |     |     |     |
| 36 |     |     |     |     |     |     |     |     |     |
| 37 |     |     |     |     |     |     |     |     |     |
| 38 |     |     |     |     |     |     |     |     |     |
| 39 |     |     |     |     |     |     |     |     |     |
| 40 |     |     |     |     |     |     |     |     |     |
| 41 |     |     |     |     |     |     |     |     |     |
| 42 |     |     |     |     |     |     |     |     |     |
| 43 |     |     |     |     |     |     |     |     |     |
| 44 |     |     |     |     |     |     |     |     |     |
| 45 |     |     |     |     |     |     |     |     |     |
| 46 |     |     |     |     |     |     |     |     |     |
| 47 |     |     |     |     |     |     |     |     |     |
| 48 |     |     |     |     |     |     |     |     |     |
| 49 |     |     |     |     |     |     |     |     |     |
| 50 |     |     |     |     |     |     |     |     |     |
| 51 |     |     |     |     |     |     |     |     |     |
| 52 |     |     |     |     |     |     |     |     |     |
| 53 |     |     |     |     |     |     |     |     |     |
| 54 |     |     |     |     |     |     |     |     |     |
| 55 |     |     |     |     |     |     |     |     |     |
| 56 |     |     |     |     |     |     |     |     |     |
| 57 |     |     |     |     |     |     |     |     |     |
| 58 |     |     |     |     |     |     |     |     |     |
| 59 |     |     |     |     |     |     |     |     |     |
| 60 |     |     |     |     |     |     |     |     |     |

For peer review only

1  
2  
3  
4  
5  
6  
7  
8  
9  
10  
11  
12  
13  
14  
15  
16  
17  
18  
19  
20  
21  
22  
23  
24  
25  
26  
27  
28  
29  
30  
31  
32  
33  
34  
35  
36  
37  
38  
39  
40  
41  
42  
43  
44  
45  
46  
47  
48  
49  
50  
51  
52  
53  
54  
55  
56  
57  
58  
59  
60

| <b>RTP</b> | <b>RWJ</b> | <b>RC9</b> | <b>RGP</b> | <b>RD8</b> | <b>RBD</b> | <b>RNQ</b> | <b>RP5</b> | <b>RVJ</b> |
|------------|------------|------------|------------|------------|------------|------------|------------|------------|
| 306        | 305        | 306        | 308        | 315        | 321        | 324        | 337        | 350        |
| 237        | 227        | 251        | 251        | 249        | 256        | 263        | 274        | 290        |
| 95         | 165        | 122        | 133        | 127        | 116        | 141        | 150        | 172        |
| 79         | 47         | 55         | 45         | 44         | 39         | 69         | 44         | 82         |
| 159        | 205        | 182        | 142        | 161        | 164        | 175        | 174        | 275        |
| 294        | 285        | 294        | 295        | 306        | 299        | 307        | 313        | 335        |
| 272        | 260        | 272        | 268        | 288        | 270        | 288        | 292        | 304        |
| 306        | 304        | 302        | 308        | 312        | 315        | 320        | 331        | 345        |
| 230        | 259        | 212        | 239        | 235        | 238        | 224        | 243        | 254        |
| 266        | 272        | 278        | 255        | 267        | 262        | 278        | 289        | 311        |
| 117        | 182        | 155        | 160        | 148        | 135        | 152        | 179        | 202        |
| 96         | 50         | 59         | 59         | 56         | 49         | 79         | 53         | 95         |
| 269        | 269        | 271        | 279        | 269        | 272        | 288        | 289        | 310        |
| 298        | 283        | 298        | 294        | 303        | 293        | 311        | 319        | 335        |
| 149        | 227        | 182        | 184        | 181        | 166        | 191        | 216        | 241        |
| 147        | 225        | 182        | 182        | 183        | 167        | 191        | 215        | 244        |
| 299        | 294        | 297        | 292        | 302        | 303        | 313        | 318        | 333        |
| 147        | 66         | 139        | 133        | 178        | 128        | 165        | 106        | 74         |
| 150        | 227        | 182        | 184        | 183        | 167        | 192        | 215        | 243        |
| 276        | 263        | 273        | 265        | 274        | 272        | 277        | 293        | 311        |
| 198        | 205        | 201        | 206        | 221        | 225        | 208        | 219        | 234        |
| 224        | 194        | 223        | 226        | 232        | 234        | 249        | 235        | 244        |
| 158        | 208        | 184        | 141        | 164        | 164        | 174        | 177        | 277        |
| 150        | 226        | 182        | 183        | 183        | 166        | 191        | 213        | 244        |
| 267        | 267        | 271        | 281        | 269        | 274        | 290        | 286        | 309        |
| 230        | 238        | 247        | 236        | 227        | 247        | 250        | 249        | 269        |
| 289        | 291        | 303        | 298        | 306        | 309        | 313        | 320        | 327        |
| 121        | 192        | 163        | 159        | 157        | 144        | 171        | 202        | 219        |
| 163        | 71         | 158        | 152        | 192        | 142        | 184        | 122        | 85         |
| 193        | 182        | 216        | 195        | 221        | 193        | 209        | 200        | 235        |
| 133        | 213        | 169        | 171        | 173        | 156        | 173        | 195        | 233        |
| 302        | 298        | 308        | 307        | 313        | 316        | 320        | 336        | 341        |
| 270        | 266        | 268        | 281        | 266        | 271        | 286        | 279        | 302        |
| 150        | 225        | 181        | 183        | 182        | 165        | 190        | 213        | 243        |
| 234        | 224        | 249        | 215        | 212        | 242        | 237        | 236        | 259        |
| 136        | 112        | 150        | 125        | 155        | 137        | 136        | 144        | 148        |
| 75         | 108        | 121        | 86         | 90         | 98         | 83         | 119        | 109        |
| 141        | 216        | 173        | 170        | 172        | 160        | 185        | 202        | 236        |
| 149        | 225        | 180        | 182        | 180        | 166        | 190        | 215        | 240        |
| 148        | 165        | 199        | 159        | 135        | 173        | 151        | 210        | 151        |
| 303        | 298        | 306        | 305        | 313        | 314        | 323        | 329        | 344        |
| 239        | 231        | 260        | 223        | 217        | 252        | 258        | 248        | 263        |
| 130        | 128        | 168        | 175        | 159        | 169        | 164        | 177        | 144        |
| 289        | 282        | 285        | 292        | 299        | 299        | 298        | 323        | 335        |
| 273        | 268        | 274        | 232        | 272        | 253        | 267        | 262        | 291        |

|    |     |     |     |     |     |     |     |     |     |
|----|-----|-----|-----|-----|-----|-----|-----|-----|-----|
| 1  |     |     |     |     |     |     |     |     |     |
| 2  | 277 | 233 | 273 | 272 | 273 | 259 | 277 | 276 | 281 |
| 3  | 293 | 289 | 299 | 284 | 296 | 307 | 315 | 319 | 330 |
| 4  | 209 | 201 | 239 | 234 | 233 | 226 | 239 | 249 | 282 |
| 5  | 149 | 222 | 178 | 181 | 182 | 164 | 187 | 215 | 238 |
| 6  | 304 | 298 | 302 | 298 | 309 | 314 | 317 | 331 | 340 |
| 7  | 292 | 285 | 290 | 292 | 298 | 302 | 312 | 318 | 329 |
| 8  |     |     |     |     |     |     |     |     |     |
| 9  |     |     |     |     |     |     |     |     |     |
| 10 |     |     |     |     |     |     |     |     |     |
| 11 |     |     |     |     |     |     |     |     |     |
| 12 |     |     |     |     |     |     |     |     |     |
| 13 |     |     |     |     |     |     |     |     |     |
| 14 |     |     |     |     |     |     |     |     |     |
| 15 |     |     |     |     |     |     |     |     |     |
| 16 |     |     |     |     |     |     |     |     |     |
| 17 |     |     |     |     |     |     |     |     |     |
| 18 |     |     |     |     |     |     |     |     |     |
| 19 |     |     |     |     |     |     |     |     |     |
| 20 |     |     |     |     |     |     |     |     |     |
| 21 |     |     |     |     |     |     |     |     |     |
| 22 |     |     |     |     |     |     |     |     |     |
| 23 |     |     |     |     |     |     |     |     |     |
| 24 |     |     |     |     |     |     |     |     |     |
| 25 |     |     |     |     |     |     |     |     |     |
| 26 |     |     |     |     |     |     |     |     |     |
| 27 |     |     |     |     |     |     |     |     |     |
| 28 |     |     |     |     |     |     |     |     |     |
| 29 |     |     |     |     |     |     |     |     |     |
| 30 |     |     |     |     |     |     |     |     |     |
| 31 |     |     |     |     |     |     |     |     |     |
| 32 |     |     |     |     |     |     |     |     |     |
| 33 |     |     |     |     |     |     |     |     |     |
| 34 |     |     |     |     |     |     |     |     |     |
| 35 |     |     |     |     |     |     |     |     |     |
| 36 |     |     |     |     |     |     |     |     |     |
| 37 |     |     |     |     |     |     |     |     |     |
| 38 |     |     |     |     |     |     |     |     |     |
| 39 |     |     |     |     |     |     |     |     |     |
| 40 |     |     |     |     |     |     |     |     |     |
| 41 |     |     |     |     |     |     |     |     |     |
| 42 |     |     |     |     |     |     |     |     |     |
| 43 |     |     |     |     |     |     |     |     |     |
| 44 |     |     |     |     |     |     |     |     |     |
| 45 |     |     |     |     |     |     |     |     |     |
| 46 |     |     |     |     |     |     |     |     |     |
| 47 |     |     |     |     |     |     |     |     |     |
| 48 |     |     |     |     |     |     |     |     |     |
| 49 |     |     |     |     |     |     |     |     |     |
| 50 |     |     |     |     |     |     |     |     |     |
| 51 |     |     |     |     |     |     |     |     |     |
| 52 |     |     |     |     |     |     |     |     |     |
| 53 |     |     |     |     |     |     |     |     |     |
| 54 |     |     |     |     |     |     |     |     |     |
| 55 |     |     |     |     |     |     |     |     |     |
| 56 |     |     |     |     |     |     |     |     |     |
| 57 |     |     |     |     |     |     |     |     |     |
| 58 |     |     |     |     |     |     |     |     |     |
| 59 |     |     |     |     |     |     |     |     |     |
| 60 |     |     |     |     |     |     |     |     |     |

For peer review only

1  
2  
3  
4  
5  
6  
7  
8  
9  
10  
11  
12  
13  
14  
15  
16  
17  
18  
19  
20  
21  
22  
23  
24  
25  
26  
27  
28  
29  
30  
31  
32  
33  
34  
35  
36  
37  
38  
39  
40  
41  
42  
43  
44  
45  
46  
47  
48  
49  
50  
51  
52  
53  
54  
55  
56  
57  
58  
59  
60

|    | <b>RW3</b> | <b>RJC</b> | <b>RAE</b> | <b>RBL</b> | <b>RGR</b> | <b>RQ6</b> | <b>R1K</b> | <b>RN7</b> | <b>RHW</b> |
|----|------------|------------|------------|------------|------------|------------|------------|------------|------------|
| 10 | 349        | 347        | 372        | 377        | 383        | 387        | 390        | 395        | 394        |
| 11 | 290        | 270        | 299        | 287        | 286        | 321        | 297        | 312        | 319        |
| 12 | 174        | 126        | 205        | 172        | 151        | 177        | 166        | 152        | 180        |
| 13 | 47         | 59         | 51         | 80         | 63         | 98         | 66         | 61         | 189        |
| 14 | 169        | 161        | 247        | 205        | 209        | 217        | 214        | 181        | 236        |
| 15 | 329        | 335        | 353        | 349        | 355        | 377        | 366        | 376        | 389        |
| 16 | 292        | 312        | 334        | 311        | 331        | 360        | 340        | 345        | 366        |
| 17 | 342        | 341        | 368        | 367        | 374        | 385        | 384        | 387        | 395        |
| 18 | 247        | 235        | 262        | 282        | 283        | 259        | 263        | 264        | 273        |
| 19 | 296        | 292        | 312        | 338        | 325        | 359        | 336        | 341        | 357        |
| 20 | 200        | 146        | 222        | 183        | 179        | 200        | 189        | 178        | 220        |
| 21 | 51         | 66         | 56         | 93         | 69         | 110        | 69         | 71         | 219        |
| 22 | 274        | 283        | 320        | 331        | 321        | 300        | 329        | 327        | 361        |
| 23 | 317        | 338        | 350        | 352        | 356        | 369        | 362        | 373        | 387        |
| 24 | 232        | 180        | 268        | 239        | 227        | 241        | 221        | 205        | 257        |
| 25 | 232        | 182        | 272        | 243        | 227        | 242        | 223        | 204        | 258        |
| 26 | 327        | 338        | 352        | 350        | 365        | 375        | 369        | 366        | 395        |
| 27 | 124        | 189        | 143        | 103        | 177        | 92         | 174        | 179        | 152        |
| 28 | 231        | 181        | 272        | 244        | 227        | 240        | 223        | 206        | 258        |
| 29 | 296        | 306        | 334        | 341        | 345        | 343        | 330        | 347        | 350        |
| 30 | 220        | 238        | 232        | 244        | 264        | 245        | 256        | 260        | 284        |
| 31 | 240        | 268        | 268        | 269        | 265        | 280        | 280        | 273        | 293        |
| 32 | 169        | 161        | 249        | 211        | 211        | 218        | 214        | 183        | 236        |
| 33 | 232        | 180        | 271        | 242        | 227        | 240        | 226        | 206        | 259        |
| 34 | 267        | 283        | 320        | 332        | 315        | 298        | 327        | 323        | 360        |
| 35 | 256        | 271        | 284        | 299        | 289        | 311        | 285        | 295        | 297        |
| 36 | 333        | 330        | 361        | 358        | 368        | 377        | 364        | 380        | 390        |
| 37 | 208        | 148        | 243        | 205        | 187        | 217        | 193        | 176        | 219        |
| 38 | 132        | 208        | 153        | 118        | 195        | 101        | 185        | 203        | 174        |
| 39 | 225        | 225        | 246        | 214        | 222        | 251        | 251        | 237        | 274        |
| 40 | 213        | 171        | 243        | 234        | 216        | 230        | 210        | 191        | 241        |
| 41 | 341        | 341        | 368        | 366        | 375        | 384        | 387        | 380        | 395        |
| 42 | 273        | 283        | 315        | 330        | 320        | 295        | 324        | 321        | 356        |
| 43 | 231        | 180        | 269        | 243        | 226        | 240        | 223        | 205        | 259        |
| 44 | 269        | 252        | 245        | 255        | 271        | 293        | 284        | 274        | 304        |
| 45 | 155        | 171        | 169        | 138        | 147        | 160        | 200        | 174        | 183        |
| 46 | 114        | 80         | 129        | 107        | 100        | 130        | 143        | 109        | 129        |
| 47 | 219        | 179        | 263        | 233        | 215        | 236        | 213        | 195        | 248        |
| 48 | 232        | 179        | 269        | 243        | 226        | 241        | 222        | 206        | 256        |
| 49 | 192        | 141        | 208        | 175        | 160        | 210        | 213        | 209        | 216        |
| 50 | 342        | 348        | 364        | 374        | 376        | 387        | 377        | 389        | 398        |
| 51 | 282        | 256        | 250        | 265        | 283        | 315        | 298        | 295        | 325        |
| 52 | 198        | 179        | 210        | 166        | 164        | 211        | 211        | 187        | 170        |
| 53 | 322        | 326        | 354        | 352        | 348        | 370        | 339        | 367        | 361        |
| 54 | 287        | 280        | 283        | 301        | 308        | 337        | 336        | 338        | 341        |

|    |     |     |     |     |     |     |     |     |     |
|----|-----|-----|-----|-----|-----|-----|-----|-----|-----|
| 1  |     |     |     |     |     |     |     |     |     |
| 2  | 274 | 317 | 323 | 327 | 331 | 337 | 320 | 338 | 347 |
| 3  | 334 | 333 | 345 | 351 | 360 | 372 | 364 | 365 | 383 |
| 4  | 247 | 265 | 280 | 264 | 243 | 272 | 278 | 262 | 296 |
| 5  | 229 | 180 | 266 | 241 | 224 | 239 | 218 | 205 | 256 |
| 6  | 345 | 344 | 364 | 371 | 374 | 385 | 378 | 383 | 396 |
| 7  | 330 | 327 | 348 | 354 | 369 | 368 | 354 | 373 | 387 |
| 8  |     |     |     |     |     |     |     |     |     |
| 9  |     |     |     |     |     |     |     |     |     |
| 10 |     |     |     |     |     |     |     |     |     |
| 11 |     |     |     |     |     |     |     |     |     |
| 12 |     |     |     |     |     |     |     |     |     |
| 13 |     |     |     |     |     |     |     |     |     |
| 14 |     |     |     |     |     |     |     |     |     |
| 15 |     |     |     |     |     |     |     |     |     |
| 16 |     |     |     |     |     |     |     |     |     |
| 17 |     |     |     |     |     |     |     |     |     |
| 18 |     |     |     |     |     |     |     |     |     |
| 19 |     |     |     |     |     |     |     |     |     |
| 20 |     |     |     |     |     |     |     |     |     |
| 21 |     |     |     |     |     |     |     |     |     |
| 22 |     |     |     |     |     |     |     |     |     |
| 23 |     |     |     |     |     |     |     |     |     |
| 24 |     |     |     |     |     |     |     |     |     |
| 25 |     |     |     |     |     |     |     |     |     |
| 26 |     |     |     |     |     |     |     |     |     |
| 27 |     |     |     |     |     |     |     |     |     |
| 28 |     |     |     |     |     |     |     |     |     |
| 29 |     |     |     |     |     |     |     |     |     |
| 30 |     |     |     |     |     |     |     |     |     |
| 31 |     |     |     |     |     |     |     |     |     |
| 32 |     |     |     |     |     |     |     |     |     |
| 33 |     |     |     |     |     |     |     |     |     |
| 34 |     |     |     |     |     |     |     |     |     |
| 35 |     |     |     |     |     |     |     |     |     |
| 36 |     |     |     |     |     |     |     |     |     |
| 37 |     |     |     |     |     |     |     |     |     |
| 38 |     |     |     |     |     |     |     |     |     |
| 39 |     |     |     |     |     |     |     |     |     |
| 40 |     |     |     |     |     |     |     |     |     |
| 41 |     |     |     |     |     |     |     |     |     |
| 42 |     |     |     |     |     |     |     |     |     |
| 43 |     |     |     |     |     |     |     |     |     |
| 44 |     |     |     |     |     |     |     |     |     |
| 45 |     |     |     |     |     |     |     |     |     |
| 46 |     |     |     |     |     |     |     |     |     |
| 47 |     |     |     |     |     |     |     |     |     |
| 48 |     |     |     |     |     |     |     |     |     |
| 49 |     |     |     |     |     |     |     |     |     |
| 50 |     |     |     |     |     |     |     |     |     |
| 51 |     |     |     |     |     |     |     |     |     |
| 52 |     |     |     |     |     |     |     |     |     |
| 53 |     |     |     |     |     |     |     |     |     |
| 54 |     |     |     |     |     |     |     |     |     |
| 55 |     |     |     |     |     |     |     |     |     |
| 56 |     |     |     |     |     |     |     |     |     |
| 57 |     |     |     |     |     |     |     |     |     |
| 58 |     |     |     |     |     |     |     |     |     |
| 59 |     |     |     |     |     |     |     |     |     |
| 60 |     |     |     |     |     |     |     |     |     |

For peer review only



1  
2  
3  
4  
5  
6  
7  
8  
9  
10  
11  
12  
13  
14  
15  
16  
17  
18  
19  
20  
21  
22  
23  
24  
25  
26  
27  
28  
29  
30  
31  
32  
33  
34  
35  
36  
37  
38  
39  
40  
41  
42  
43  
44  
45  
46  
47  
48  
49  
50  
51  
52  
53  
54  
55  
56  
57  
58  
59  
60

|    | RNL | RCX | RPA | RWH | RM2 | RR7 | RNS | RN3 | RGN |
|----|-----|-----|-----|-----|-----|-----|-----|-----|-----|
| 10 | 406 | 407 | 409 | 421 | 423 | 428 | 432 | 425 | 432 |
| 11 | 318 | 319 | 343 | 332 | 338 | 342 | 347 | 358 | 329 |
| 12 | 164 | 179 | 184 | 216 | 242 | 189 | 207 | 202 | 201 |
| 13 | 97  | 70  | 76  | 130 | 74  | 102 | 108 | 71  | 95  |
| 14 | 193 | 208 | 218 | 232 | 336 | 248 | 212 | 244 | 252 |
| 15 | 383 | 374 | 397 | 405 | 402 | 416 | 422 | 409 | 405 |
| 16 | 363 | 341 | 374 | 382 | 373 | 382 | 393 | 384 | 366 |
| 17 | 399 | 399 | 401 | 418 | 414 | 419 | 429 | 422 | 431 |
| 18 | 297 | 305 | 292 | 320 | 249 | 290 | 307 | 297 | 327 |
| 19 | 355 | 341 | 351 | 369 | 373 | 396 | 397 | 364 | 381 |
| 20 | 188 | 186 | 221 | 251 | 280 | 206 | 233 | 222 | 224 |
| 21 | 119 | 84  | 93  | 168 | 87  | 114 | 123 | 82  | 113 |
| 22 | 343 | 366 | 379 | 375 | 377 | 383 | 381 | 396 | 393 |
| 23 | 382 | 374 | 398 | 402 | 399 | 412 | 418 | 409 | 397 |
| 24 | 225 | 231 | 266 | 293 | 330 | 251 | 269 | 288 | 275 |
| 25 | 225 | 235 | 265 | 291 | 331 | 249 | 269 | 289 | 276 |
| 26 | 388 | 387 | 394 | 403 | 409 | 409 | 416 | 406 | 405 |
| 27 | 196 | 184 | 199 | 172 | 114 | 179 | 251 | 245 | 176 |
| 28 | 226 | 232 | 265 | 290 | 329 | 250 | 270 | 288 | 277 |
| 29 | 353 | 351 | 382 | 374 | 366 | 355 | 389 | 386 | 382 |
| 30 | 311 | 245 | 262 | 298 | 296 | 314 | 301 | 297 | 277 |
| 31 | 326 | 288 | 292 | 308 | 279 | 320 | 338 | 323 | 323 |
| 32 | 194 | 210 | 220 | 230 | 335 | 248 | 212 | 247 | 256 |
| 33 | 226 | 233 | 266 | 295 | 331 | 253 | 269 | 289 | 275 |
| 34 | 343 | 364 | 376 | 376 | 373 | 383 | 376 | 395 | 395 |
| 35 | 322 | 303 | 325 | 325 | 326 | 315 | 342 | 313 | 333 |
| 36 | 390 | 385 | 398 | 409 | 407 | 403 | 419 | 409 | 415 |
| 37 | 197 | 198 | 230 | 249 | 308 | 231 | 243 | 248 | 236 |
| 38 | 216 | 198 | 226 | 199 | 123 | 204 | 271 | 274 | 204 |
| 39 | 261 | 254 | 268 | 294 | 273 | 299 | 306 | 302 | 260 |
| 40 | 215 | 221 | 247 | 265 | 308 | 233 | 258 | 264 | 264 |
| 41 | 395 | 396 | 406 | 413 | 420 | 423 | 427 | 421 | 428 |
| 42 | 343 | 357 | 376 | 370 | 375 | 374 | 374 | 391 | 389 |
| 43 | 225 | 228 | 265 | 293 | 330 | 250 | 271 | 290 | 274 |
| 44 | 288 | 266 | 291 | 302 | 306 | 329 | 336 | 307 | 299 |
| 45 | 180 | 182 | 198 | 222 | 185 | 212 | 207 | 211 | 177 |
| 46 | 111 | 106 | 110 | 131 | 160 | 129 | 144 | 115 | 105 |
| 47 | 214 | 226 | 250 | 286 | 317 | 241 | 257 | 279 | 267 |
| 48 | 222 | 230 | 266 | 292 | 329 | 248 | 267 | 289 | 274 |
| 49 | 187 | 203 | 213 | 199 | 229 | 214 | 249 | 230 | 179 |
| 50 | 402 | 397 | 409 | 416 | 417 | 418 | 425 | 421 | 426 |
| 51 | 304 | 281 | 307 | 323 | 322 | 349 | 355 | 320 | 305 |
| 52 | 206 | 206 | 221 | 221 | 227 | 223 | 226 | 235 | 189 |
| 53 | 380 | 380 | 378 | 386 | 393 | 400 | 422 | 399 | 394 |
| 54 | 320 | 309 | 368 | 363 | 337 | 367 | 390 | 384 | 369 |

|    |     |     |     |     |     |     |     |     |     |
|----|-----|-----|-----|-----|-----|-----|-----|-----|-----|
| 1  |     |     |     |     |     |     |     |     |     |
| 2  | 364 | 349 | 365 | 368 | 345 | 379 | 392 | 388 | 363 |
| 3  | 383 | 388 | 393 | 400 | 412 | 412 | 418 | 405 | 407 |
| 4  | 295 | 281 | 317 | 324 | 299 | 316 | 313 | 337 | 314 |
| 5  | 224 | 230 | 261 | 287 | 322 | 246 | 267 | 289 | 273 |
| 6  | 399 | 394 | 403 | 413 | 417 | 418 | 426 | 416 | 421 |
| 7  | 381 | 382 | 398 | 401 | 401 | 407 | 414 | 408 | 412 |
| 8  |     |     |     |     |     |     |     |     |     |
| 9  |     |     |     |     |     |     |     |     |     |
| 10 |     |     |     |     |     |     |     |     |     |
| 11 |     |     |     |     |     |     |     |     |     |
| 12 |     |     |     |     |     |     |     |     |     |
| 13 |     |     |     |     |     |     |     |     |     |
| 14 |     |     |     |     |     |     |     |     |     |
| 15 |     |     |     |     |     |     |     |     |     |
| 16 |     |     |     |     |     |     |     |     |     |
| 17 |     |     |     |     |     |     |     |     |     |
| 18 |     |     |     |     |     |     |     |     |     |
| 19 |     |     |     |     |     |     |     |     |     |
| 20 |     |     |     |     |     |     |     |     |     |
| 21 |     |     |     |     |     |     |     |     |     |
| 22 |     |     |     |     |     |     |     |     |     |
| 23 |     |     |     |     |     |     |     |     |     |
| 24 |     |     |     |     |     |     |     |     |     |
| 25 |     |     |     |     |     |     |     |     |     |
| 26 |     |     |     |     |     |     |     |     |     |
| 27 |     |     |     |     |     |     |     |     |     |
| 28 |     |     |     |     |     |     |     |     |     |
| 29 |     |     |     |     |     |     |     |     |     |
| 30 |     |     |     |     |     |     |     |     |     |
| 31 |     |     |     |     |     |     |     |     |     |
| 32 |     |     |     |     |     |     |     |     |     |
| 33 |     |     |     |     |     |     |     |     |     |
| 34 |     |     |     |     |     |     |     |     |     |
| 35 |     |     |     |     |     |     |     |     |     |
| 36 |     |     |     |     |     |     |     |     |     |
| 37 |     |     |     |     |     |     |     |     |     |
| 38 |     |     |     |     |     |     |     |     |     |
| 39 |     |     |     |     |     |     |     |     |     |
| 40 |     |     |     |     |     |     |     |     |     |
| 41 |     |     |     |     |     |     |     |     |     |
| 42 |     |     |     |     |     |     |     |     |     |
| 43 |     |     |     |     |     |     |     |     |     |
| 44 |     |     |     |     |     |     |     |     |     |
| 45 |     |     |     |     |     |     |     |     |     |
| 46 |     |     |     |     |     |     |     |     |     |
| 47 |     |     |     |     |     |     |     |     |     |
| 48 |     |     |     |     |     |     |     |     |     |
| 49 |     |     |     |     |     |     |     |     |     |
| 50 |     |     |     |     |     |     |     |     |     |
| 51 |     |     |     |     |     |     |     |     |     |
| 52 |     |     |     |     |     |     |     |     |     |
| 53 |     |     |     |     |     |     |     |     |     |
| 54 |     |     |     |     |     |     |     |     |     |
| 55 |     |     |     |     |     |     |     |     |     |
| 56 |     |     |     |     |     |     |     |     |     |
| 57 |     |     |     |     |     |     |     |     |     |
| 58 |     |     |     |     |     |     |     |     |     |
| 59 |     |     |     |     |     |     |     |     |     |
| 60 |     |     |     |     |     |     |     |     |     |

For peer review only

1  
2  
3  
4  
5  
6  
7  
8  
9  
10  
11  
12  
13  
14  
15  
16  
17  
18  
19  
20  
21  
22  
23  
24  
25  
26  
27  
28  
29  
30  
31  
32  
33  
34  
35  
36  
37  
38  
39  
40  
41  
42  
43  
44  
45  
46  
47  
48  
49  
50  
51  
52  
53  
54  
55  
56  
57  
58  
59  
60

| RVW | RNZ | RDE | RLN | RWY | RGQ | RXP | RXH | RXK |
|-----|-----|-----|-----|-----|-----|-----|-----|-----|
| 439 | 442 | 446 | 464 | 465 | 479 | 494 | 499 | 500 |
| 375 | 338 | 369 | 391 | 356 | 376 | 401 | 378 | 418 |
| 207 | 171 | 202 | 183 | 172 | 190 | 214 | 226 | 215 |
| 96  | 67  | 110 | 70  | 76  | 127 | 70  | 108 | 104 |
| 234 | 241 | 211 | 210 | 241 | 202 | 244 | 304 | 280 |
| 423 | 419 | 436 | 444 | 440 | 454 | 470 | 462 | 485 |
| 391 | 380 | 411 | 405 | 419 | 409 | 422 | 425 | 460 |
| 431 | 441 | 441 | 453 | 457 | 467 | 488 | 497 | 491 |
| 279 | 311 | 332 | 349 | 341 | 353 | 387 | 349 | 324 |
| 393 | 379 | 402 | 420 | 395 | 386 | 429 | 430 | 446 |
| 235 | 205 | 216 | 215 | 209 | 230 | 227 | 240 | 245 |
| 121 | 77  | 139 | 73  | 90  | 150 | 81  | 130 | 124 |
| 375 | 383 | 384 | 391 | 404 | 408 | 408 | 413 | 437 |
| 419 | 420 | 434 | 443 | 449 | 448 | 475 | 465 | 485 |
| 274 | 252 | 257 | 254 | 270 | 266 | 279 | 307 | 298 |
| 277 | 251 | 258 | 255 | 270 | 268 | 282 | 305 | 299 |
| 412 | 431 | 437 | 441 | 455 | 443 | 462 | 483 | 473 |
| 237 | 193 | 210 | 219 | 235 | 237 | 244 | 156 | 242 |
| 276 | 251 | 257 | 253 | 272 | 269 | 281 | 307 | 299 |
| 385 | 377 | 400 | 411 | 408 | 410 | 436 | 438 | 455 |
| 274 | 282 | 293 | 332 | 295 | 304 | 350 | 310 | 322 |
| 352 | 306 | 336 | 343 | 347 | 373 | 380 | 345 | 355 |
| 234 | 239 | 215 | 212 | 244 | 205 | 243 | 311 | 277 |
| 276 | 252 | 258 | 254 | 274 | 271 | 283 | 310 | 300 |
| 375 | 383 | 379 | 384 | 401 | 406 | 402 | 410 | 434 |
| 331 | 348 | 321 | 352 | 359 | 369 | 375 | 403 | 375 |
| 412 | 428 | 426 | 447 | 449 | 458 | 478 | 473 | 475 |
| 244 | 218 | 221 | 220 | 227 | 221 | 244 | 257 | 268 |
| 261 | 215 | 228 | 231 | 255 | 250 | 274 | 181 | 258 |
| 292 | 275 | 309 | 301 | 294 | 270 | 288 | 306 | 339 |
| 261 | 224 | 242 | 239 | 244 | 248 | 261 | 289 | 276 |
| 431 | 435 | 446 | 457 | 458 | 464 | 482 | 490 | 493 |
| 378 | 379 | 374 | 379 | 405 | 409 | 400 | 410 | 427 |
| 274 | 250 | 257 | 254 | 272 | 270 | 281 | 306 | 299 |
| 331 | 313 | 362 | 345 | 329 | 359 | 384 | 325 | 354 |
| 217 | 183 | 191 | 204 | 223 | 202 | 207 | 208 | 244 |
| 125 | 115 | 132 | 159 | 138 | 122 | 170 | 134 | 153 |
| 266 | 237 | 253 | 241 | 261 | 260 | 279 | 293 | 288 |
| 276 | 250 | 253 | 254 | 271 | 268 | 279 | 306 | 298 |
| 212 | 215 | 214 | 291 | 243 | 222 | 278 | 204 | 254 |
| 432 | 436 | 444 | 455 | 462 | 469 | 486 | 490 | 495 |
| 342 | 326 | 383 | 364 | 338 | 380 | 393 | 346 | 363 |
| 250 | 194 | 209 | 284 | 233 | 212 | 264 | 241 | 307 |
| 425 | 403 | 415 | 439 | 424 | 420 | 462 | 485 | 478 |
| 361 | 365 | 379 | 395 | 385 | 386 | 397 | 405 | 399 |

|    |     |     |     |     |     |     |     |     |     |
|----|-----|-----|-----|-----|-----|-----|-----|-----|-----|
| 1  |     |     |     |     |     |     |     |     |     |
| 2  | 404 | 389 | 395 | 397 | 403 | 438 | 428 | 412 | 421 |
| 3  | 409 | 422 | 439 | 443 | 446 | 455 | 467 | 479 | 476 |
| 4  | 314 | 307 | 356 | 335 | 324 | 356 | 331 | 351 | 375 |
| 5  | 275 | 247 | 250 | 254 | 271 | 264 | 280 | 306 | 300 |
| 6  | 432 | 436 | 444 | 455 | 457 | 471 | 480 | 486 | 491 |
| 7  | 405 | 421 | 429 | 438 | 437 | 453 | 460 | 471 | 458 |
| 8  |     |     |     |     |     |     |     |     |     |
| 9  |     |     |     |     |     |     |     |     |     |
| 10 |     |     |     |     |     |     |     |     |     |
| 11 |     |     |     |     |     |     |     |     |     |
| 12 |     |     |     |     |     |     |     |     |     |
| 13 |     |     |     |     |     |     |     |     |     |
| 14 |     |     |     |     |     |     |     |     |     |
| 15 |     |     |     |     |     |     |     |     |     |
| 16 |     |     |     |     |     |     |     |     |     |
| 17 |     |     |     |     |     |     |     |     |     |
| 18 |     |     |     |     |     |     |     |     |     |
| 19 |     |     |     |     |     |     |     |     |     |
| 20 |     |     |     |     |     |     |     |     |     |
| 21 |     |     |     |     |     |     |     |     |     |
| 22 |     |     |     |     |     |     |     |     |     |
| 23 |     |     |     |     |     |     |     |     |     |
| 24 |     |     |     |     |     |     |     |     |     |
| 25 |     |     |     |     |     |     |     |     |     |
| 26 |     |     |     |     |     |     |     |     |     |
| 27 |     |     |     |     |     |     |     |     |     |
| 28 |     |     |     |     |     |     |     |     |     |
| 29 |     |     |     |     |     |     |     |     |     |
| 30 |     |     |     |     |     |     |     |     |     |
| 31 |     |     |     |     |     |     |     |     |     |
| 32 |     |     |     |     |     |     |     |     |     |
| 33 |     |     |     |     |     |     |     |     |     |
| 34 |     |     |     |     |     |     |     |     |     |
| 35 |     |     |     |     |     |     |     |     |     |
| 36 |     |     |     |     |     |     |     |     |     |
| 37 |     |     |     |     |     |     |     |     |     |
| 38 |     |     |     |     |     |     |     |     |     |
| 39 |     |     |     |     |     |     |     |     |     |
| 40 |     |     |     |     |     |     |     |     |     |
| 41 |     |     |     |     |     |     |     |     |     |
| 42 |     |     |     |     |     |     |     |     |     |
| 43 |     |     |     |     |     |     |     |     |     |
| 44 |     |     |     |     |     |     |     |     |     |
| 45 |     |     |     |     |     |     |     |     |     |
| 46 |     |     |     |     |     |     |     |     |     |
| 47 |     |     |     |     |     |     |     |     |     |
| 48 |     |     |     |     |     |     |     |     |     |
| 49 |     |     |     |     |     |     |     |     |     |
| 50 |     |     |     |     |     |     |     |     |     |
| 51 |     |     |     |     |     |     |     |     |     |
| 52 |     |     |     |     |     |     |     |     |     |
| 53 |     |     |     |     |     |     |     |     |     |
| 54 |     |     |     |     |     |     |     |     |     |
| 55 |     |     |     |     |     |     |     |     |     |
| 56 |     |     |     |     |     |     |     |     |     |
| 57 |     |     |     |     |     |     |     |     |     |
| 58 |     |     |     |     |     |     |     |     |     |
| 59 |     |     |     |     |     |     |     |     |     |
| 60 |     |     |     |     |     |     |     |     |     |

For peer review only

1  
2  
3  
4  
5  
6  
7  
8  
9  
10  
11  
12  
13  
14  
15  
16  
17  
18  
19  
20  
21  
22  
23  
24  
25  
26  
27  
28  
29  
30  
31  
32  
33  
34  
35  
36  
37  
38  
39  
40  
41  
42  
43  
44  
45  
46  
47  
48  
49  
50  
51  
52  
53  
54  
55  
56  
57  
58  
59  
60

| RD1 | RJL | RXF | RQ8 | RXQ | RTF | RD3 | RW6 | RNA |
|-----|-----|-----|-----|-----|-----|-----|-----|-----|
| 496 | 507 | 511 | 517 | 519 | 530 | 538 | 543 | 547 |
| 400 | 403 | 440 | 422 | 414 | 439 | 432 | 437 | 440 |
| 200 | 241 | 233 | 232 | 203 | 191 | 234 | 220 | 245 |
| 118 | 83  | 82  | 74  | 54  | 96  | 153 | 100 | 67  |
| 263 | 256 | 264 | 309 | 284 | 219 | 274 | 237 | 301 |
| 473 | 492 | 482 | 483 | 491 | 515 | 513 | 507 | 512 |
| 443 | 455 | 462 | 448 | 459 | 484 | 484 | 478 | 478 |
| 494 | 502 | 499 | 511 | 512 | 522 | 528 | 528 | 536 |
| 362 | 394 | 379 | 383 | 389 | 396 | 397 | 426 | 395 |
| 435 | 444 | 452 | 445 | 436 | 464 | 454 | 468 | 477 |
| 242 | 259 | 276 | 263 | 243 | 213 | 290 | 246 | 271 |
| 141 | 95  | 88  | 84  | 59  | 119 | 185 | 125 | 81  |
| 395 | 452 | 424 | 446 | 451 | 430 | 473 | 458 | 476 |
| 478 | 490 | 486 | 500 | 497 | 515 | 515 | 505 | 515 |
| 295 | 312 | 320 | 305 | 308 | 258 | 337 | 299 | 326 |
| 297 | 312 | 321 | 307 | 306 | 258 | 338 | 301 | 329 |
| 480 | 489 | 491 | 500 | 504 | 516 | 523 | 517 | 524 |
| 205 | 289 | 284 | 244 | 263 | 321 | 266 | 166 | 285 |
| 299 | 311 | 316 | 305 | 307 | 260 | 340 | 301 | 328 |
| 457 | 432 | 457 | 450 | 443 | 446 | 461 | 486 | 480 |
| 353 | 321 | 351 | 332 | 343 | 395 | 371 | 373 | 349 |
| 336 | 398 | 396 | 401 | 381 | 426 | 392 | 389 | 418 |
| 265 | 257 | 272 | 311 | 290 | 220 | 275 | 238 | 306 |
| 297 | 311 | 321 | 307 | 309 | 260 | 337 | 298 | 329 |
| 396 | 453 | 425 | 448 | 451 | 420 | 475 | 455 | 475 |
| 375 | 388 | 393 | 416 | 410 | 413 | 411 | 408 | 418 |
| 483 | 478 | 494 | 496 | 497 | 526 | 515 | 518 | 525 |
| 260 | 273 | 272 | 257 | 254 | 232 | 288 | 260 | 262 |
| 228 | 315 | 316 | 261 | 293 | 352 | 290 | 181 | 315 |
| 291 | 340 | 337 | 329 | 305 | 353 | 349 | 336 | 344 |
| 272 | 294 | 291 | 293 | 292 | 235 | 326 | 279 | 310 |
| 487 | 502 | 504 | 510 | 507 | 524 | 525 | 537 | 540 |
| 392 | 450 | 425 | 446 | 449 | 421 | 471 | 443 | 470 |
| 296 | 311 | 318 | 305 | 307 | 257 | 339 | 301 | 329 |
| 342 | 391 | 341 | 394 | 363 | 400 | 438 | 354 | 359 |
| 217 | 214 | 240 | 229 | 216 | 235 | 231 | 246 | 253 |
| 131 | 132 | 181 | 134 | 141 | 165 | 182 | 206 | 145 |
| 290 | 292 | 304 | 301 | 299 | 246 | 338 | 282 | 318 |
| 293 | 311 | 316 | 305 | 307 | 258 | 337 | 299 | 329 |
| 223 | 256 | 296 | 226 | 208 | 334 | 342 | 335 | 240 |
| 497 | 495 | 506 | 512 | 518 | 530 | 534 | 535 | 542 |
| 368 | 399 | 359 | 414 | 388 | 424 | 463 | 370 | 381 |
| 237 | 304 | 292 | 262 | 219 | 309 | 264 | 298 | 318 |
| 464 | 468 | 482 | 484 | 461 | 489 | 492 | 497 | 506 |
| 453 | 371 | 405 | 434 | 428 | 473 | 423 | 425 | 420 |

|    |     |     |     |     |     |     |     |     |     |
|----|-----|-----|-----|-----|-----|-----|-----|-----|-----|
| 1  |     |     |     |     |     |     |     |     |     |
| 2  | 433 | 459 | 448 | 456 | 462 | 481 | 479 | 452 | 497 |
| 3  | 476 | 493 | 472 | 498 | 496 | 515 | 526 | 507 | 517 |
| 4  | 357 | 374 | 381 | 369 | 388 | 385 | 404 | 381 | 431 |
| 5  | 294 | 308 | 317 | 304 | 302 | 254 | 335 | 300 | 323 |
| 6  | 494 | 499 | 507 | 508 | 514 | 530 | 529 | 527 | 538 |
| 7  | 474 | 485 | 479 | 490 | 504 | 508 | 495 | 519 | 517 |
| 8  |     |     |     |     |     |     |     |     |     |
| 9  |     |     |     |     |     |     |     |     |     |
| 10 |     |     |     |     |     |     |     |     |     |
| 11 |     |     |     |     |     |     |     |     |     |
| 12 |     |     |     |     |     |     |     |     |     |
| 13 |     |     |     |     |     |     |     |     |     |
| 14 |     |     |     |     |     |     |     |     |     |
| 15 |     |     |     |     |     |     |     |     |     |
| 16 |     |     |     |     |     |     |     |     |     |
| 17 |     |     |     |     |     |     |     |     |     |
| 18 |     |     |     |     |     |     |     |     |     |
| 19 |     |     |     |     |     |     |     |     |     |
| 20 |     |     |     |     |     |     |     |     |     |
| 21 |     |     |     |     |     |     |     |     |     |
| 22 |     |     |     |     |     |     |     |     |     |
| 23 |     |     |     |     |     |     |     |     |     |
| 24 |     |     |     |     |     |     |     |     |     |
| 25 |     |     |     |     |     |     |     |     |     |
| 26 |     |     |     |     |     |     |     |     |     |
| 27 |     |     |     |     |     |     |     |     |     |
| 28 |     |     |     |     |     |     |     |     |     |
| 29 |     |     |     |     |     |     |     |     |     |
| 30 |     |     |     |     |     |     |     |     |     |
| 31 |     |     |     |     |     |     |     |     |     |
| 32 |     |     |     |     |     |     |     |     |     |
| 33 |     |     |     |     |     |     |     |     |     |
| 34 |     |     |     |     |     |     |     |     |     |
| 35 |     |     |     |     |     |     |     |     |     |
| 36 |     |     |     |     |     |     |     |     |     |
| 37 |     |     |     |     |     |     |     |     |     |
| 38 |     |     |     |     |     |     |     |     |     |
| 39 |     |     |     |     |     |     |     |     |     |
| 40 |     |     |     |     |     |     |     |     |     |
| 41 |     |     |     |     |     |     |     |     |     |
| 42 |     |     |     |     |     |     |     |     |     |
| 43 |     |     |     |     |     |     |     |     |     |
| 44 |     |     |     |     |     |     |     |     |     |
| 45 |     |     |     |     |     |     |     |     |     |
| 46 |     |     |     |     |     |     |     |     |     |
| 47 |     |     |     |     |     |     |     |     |     |
| 48 |     |     |     |     |     |     |     |     |     |
| 49 |     |     |     |     |     |     |     |     |     |
| 50 |     |     |     |     |     |     |     |     |     |
| 51 |     |     |     |     |     |     |     |     |     |
| 52 |     |     |     |     |     |     |     |     |     |
| 53 |     |     |     |     |     |     |     |     |     |
| 54 |     |     |     |     |     |     |     |     |     |
| 55 |     |     |     |     |     |     |     |     |     |
| 56 |     |     |     |     |     |     |     |     |     |
| 57 |     |     |     |     |     |     |     |     |     |
| 58 |     |     |     |     |     |     |     |     |     |
| 59 |     |     |     |     |     |     |     |     |     |
| 60 |     |     |     |     |     |     |     |     |     |

For peer review only

1  
2  
3  
4  
5  
6  
7  
8  
9  
10  
11  
12  
13  
14  
15  
16  
17  
18  
19  
20  
21  
22  
23  
24  
25  
26  
27  
28  
29  
30  
31  
32  
33  
34  
35  
36  
37  
38  
39  
40  
41  
42  
43  
44  
45  
46  
47  
48  
49  
50  
51  
52  
53  
54  
55  
56  
57  
58  
59  
60

|    | RA9 | RA2 | RTX | RXC | RXL | RBA | RAJ | RRK | RHU |
|----|-----|-----|-----|-----|-----|-----|-----|-----|-----|
| 10 | 562 | 591 | 595 | 601 | 616 | 628 | 636 | 644 | 661 |
| 11 | 440 | 444 | 458 | 442 | 508 | 474 | 493 | 512 | 533 |
| 12 | 227 | 301 | 218 | 240 | 285 | 255 | 291 | 373 | 307 |
| 13 | 175 | 131 | 79  | 69  | 83  | 139 | 178 | 119 | 240 |
| 14 | 324 | 399 | 273 | 294 | 318 | 332 | 299 | 398 | 402 |
| 15 | 532 | 560 | 571 | 578 | 594 | 595 | 620 | 613 | 631 |
| 16 | 497 | 536 | 524 | 521 | 552 | 555 | 584 | 577 | 590 |
| 17 | 563 | 581 | 581 | 589 | 609 | 620 | 623 | 644 | 649 |
| 18 | 411 | 451 | 434 | 476 | 456 | 451 | 449 | 475 | 482 |
| 19 | 484 | 537 | 521 | 518 | 540 | 543 | 567 | 564 | 580 |
| 20 | 263 | 363 | 248 | 276 | 317 | 298 | 333 | 423 | 371 |
| 21 | 211 | 170 | 85  | 78  | 107 | 169 | 226 | 150 | 266 |
| 22 | 521 | 501 | 520 | 508 | 511 | 539 | 536 | 559 | 593 |
| 23 | 539 | 562 | 563 | 579 | 589 | 602 | 613 | 616 | 625 |
| 24 | 321 | 454 | 314 | 334 | 370 | 359 | 401 | 504 | 452 |
| 25 | 323 | 454 | 315 | 333 | 372 | 361 | 402 | 507 | 451 |
| 26 | 553 | 569 | 570 | 583 | 598 | 602 | 615 | 617 | 640 |
| 27 | 210 | 189 | 293 | 290 | 301 | 304 | 323 | 215 | 336 |
| 28 | 321 | 454 | 314 | 334 | 371 | 361 | 402 | 504 | 452 |
| 29 | 496 | 518 | 493 | 534 | 542 | 558 | 556 | 566 | 593 |
| 30 | 347 | 408 | 406 | 406 | 402 | 420 | 405 | 439 | 439 |
| 31 | 426 | 402 | 465 | 439 | 471 | 449 | 479 | 455 | 466 |
| 32 | 328 | 400 | 271 | 294 | 321 | 328 | 299 | 404 | 401 |
| 33 | 323 | 454 | 315 | 333 | 372 | 363 | 402 | 506 | 452 |
| 34 | 511 | 496 | 523 | 502 | 513 | 529 | 534 | 555 | 591 |
| 35 | 432 | 450 | 462 | 473 | 476 | 478 | 472 | 529 | 517 |
| 36 | 554 | 568 | 577 | 584 | 580 | 607 | 605 | 629 | 616 |
| 37 | 285 | 394 | 250 | 289 | 337 | 308 | 334 | 451 | 399 |
| 38 | 234 | 222 | 324 | 327 | 331 | 337 | 355 | 243 | 366 |
| 39 | 367 | 355 | 352 | 368 | 400 | 385 | 431 | 403 | 450 |
| 40 | 305 | 425 | 289 | 305 | 348 | 327 | 377 | 490 | 422 |
| 41 | 557 | 579 | 587 | 597 | 608 | 617 | 631 | 642 | 650 |
| 42 | 513 | 498 | 525 | 500 | 500 | 528 | 531 | 553 | 588 |
| 43 | 318 | 452 | 315 | 332 | 373 | 359 | 402 | 506 | 450 |
| 44 | 415 | 454 | 427 | 465 | 487 | 464 | 468 | 452 | 461 |
| 45 | 226 | 255 | 229 | 241 | 263 | 284 | 298 | 301 | 323 |
| 46 | 137 | 151 | 147 | 151 | 184 | 140 | 186 | 210 | 200 |
| 47 | 314 | 439 | 296 | 321 | 362 | 353 | 387 | 495 | 446 |
| 48 | 318 | 452 | 313 | 332 | 370 | 358 | 399 | 504 | 447 |
| 49 | 215 | 268 | 306 | 279 | 354 | 243 | 337 | 321 | 293 |
| 50 | 564 | 578 | 591 | 599 | 612 | 619 | 626 | 649 | 652 |
| 51 | 422 | 465 | 443 | 500 | 514 | 477 | 490 | 472 | 507 |
| 52 | 291 | 233 | 321 | 288 | 322 | 283 | 323 | 356 | 335 |
| 53 | 534 | 547 | 561 | 552 | 570 | 588 | 592 | 604 | 615 |
| 54 | 427 | 527 | 491 | 511 | 459 | 581 | 526 | 538 | 498 |

|    |     |     |     |     |     |     |     |     |     |
|----|-----|-----|-----|-----|-----|-----|-----|-----|-----|
| 1  |     |     |     |     |     |     |     |     |     |
| 2  | 507 | 487 | 539 | 539 | 534 | 551 | 553 | 557 | 575 |
| 3  | 546 | 567 | 559 | 587 | 602 | 597 | 613 | 614 | 637 |
| 4  | 456 | 404 | 436 | 395 | 454 | 438 | 520 | 426 | 519 |
| 5  | 312 | 452 | 312 | 332 | 366 | 359 | 399 | 504 | 448 |
| 6  | 561 | 574 | 588 | 596 | 612 | 614 | 624 | 640 | 643 |
| 7  | 543 | 553 | 579 | 575 | 595 | 589 | 602 | 623 | 625 |
| 8  |     |     |     |     |     |     |     |     |     |
| 9  |     |     |     |     |     |     |     |     |     |
| 10 |     |     |     |     |     |     |     |     |     |
| 11 |     |     |     |     |     |     |     |     |     |
| 12 |     |     |     |     |     |     |     |     |     |
| 13 |     |     |     |     |     |     |     |     |     |
| 14 |     |     |     |     |     |     |     |     |     |
| 15 |     |     |     |     |     |     |     |     |     |
| 16 |     |     |     |     |     |     |     |     |     |
| 17 |     |     |     |     |     |     |     |     |     |
| 18 |     |     |     |     |     |     |     |     |     |
| 19 |     |     |     |     |     |     |     |     |     |
| 20 |     |     |     |     |     |     |     |     |     |
| 21 |     |     |     |     |     |     |     |     |     |
| 22 |     |     |     |     |     |     |     |     |     |
| 23 |     |     |     |     |     |     |     |     |     |
| 24 |     |     |     |     |     |     |     |     |     |
| 25 |     |     |     |     |     |     |     |     |     |
| 26 |     |     |     |     |     |     |     |     |     |
| 27 |     |     |     |     |     |     |     |     |     |
| 28 |     |     |     |     |     |     |     |     |     |
| 29 |     |     |     |     |     |     |     |     |     |
| 30 |     |     |     |     |     |     |     |     |     |
| 31 |     |     |     |     |     |     |     |     |     |
| 32 |     |     |     |     |     |     |     |     |     |
| 33 |     |     |     |     |     |     |     |     |     |
| 34 |     |     |     |     |     |     |     |     |     |
| 35 |     |     |     |     |     |     |     |     |     |
| 36 |     |     |     |     |     |     |     |     |     |
| 37 |     |     |     |     |     |     |     |     |     |
| 38 |     |     |     |     |     |     |     |     |     |
| 39 |     |     |     |     |     |     |     |     |     |
| 40 |     |     |     |     |     |     |     |     |     |
| 41 |     |     |     |     |     |     |     |     |     |
| 42 |     |     |     |     |     |     |     |     |     |
| 43 |     |     |     |     |     |     |     |     |     |
| 44 |     |     |     |     |     |     |     |     |     |
| 45 |     |     |     |     |     |     |     |     |     |
| 46 |     |     |     |     |     |     |     |     |     |
| 47 |     |     |     |     |     |     |     |     |     |
| 48 |     |     |     |     |     |     |     |     |     |
| 49 |     |     |     |     |     |     |     |     |     |
| 50 |     |     |     |     |     |     |     |     |     |
| 51 |     |     |     |     |     |     |     |     |     |
| 52 |     |     |     |     |     |     |     |     |     |
| 53 |     |     |     |     |     |     |     |     |     |
| 54 |     |     |     |     |     |     |     |     |     |
| 55 |     |     |     |     |     |     |     |     |     |
| 56 |     |     |     |     |     |     |     |     |     |
| 57 |     |     |     |     |     |     |     |     |     |
| 58 |     |     |     |     |     |     |     |     |     |
| 59 |     |     |     |     |     |     |     |     |     |
| 60 |     |     |     |     |     |     |     |     |     |

For peer review only



1  
2  
3  
4  
5  
6  
7  
8  
9  
10  
11  
12  
13  
14  
15  
16  
17  
18  
19  
20  
21  
22  
23  
24  
25  
26  
27  
28  
29  
30  
31  
32  
33  
34  
35  
36  
37  
38  
39  
40  
41  
42  
43  
44  
45  
46  
47  
48  
49  
50  
51  
52  
53  
54  
55  
56  
57  
58  
59  
60

|    | RXR | RJ7 | RR1 | RYR | RXN | RYJ | RX1 | RWD | RL4 |
|----|-----|-----|-----|-----|-----|-----|-----|-----|-----|
| 10 | 668 | 661 | 689 | 702 | 712 | 713 | 729 | 733 | 735 |
| 11 | 558 | 520 | 552 | 526 | 571 | 559 | 587 | 591 | 592 |
| 12 | 278 | 332 | 348 | 263 | 302 | 397 | 404 | 304 | 336 |
| 13 | 101 | 115 | 109 | 91  | 310 | 196 | 240 | 237 | 165 |
| 14 | 300 | 378 | 447 | 334 | 414 | 428 | 473 | 346 | 375 |
| 15 | 642 | 640 | 665 | 654 | 680 | 696 | 689 | 711 | 705 |
| 16 | 601 | 595 | 614 | 611 | 653 | 670 | 666 | 657 | 658 |
| 17 | 660 | 657 | 683 | 693 | 711 | 706 | 715 | 729 | 723 |
| 18 | 497 | 452 | 508 | 492 | 545 | 510 | 537 | 529 | 544 |
| 19 | 582 | 598 | 601 | 599 | 641 | 632 | 646 | 644 | 656 |
| 20 | 295 | 367 | 402 | 307 | 343 | 407 | 449 | 347 | 389 |
| 21 | 126 | 132 | 130 | 116 | 372 | 228 | 294 | 269 | 199 |
| 22 | 585 | 563 | 642 | 595 | 632 | 611 | 666 | 632 | 633 |
| 23 | 637 | 635 | 652 | 657 | 685 | 688 | 701 | 696 | 707 |
| 24 | 351 | 435 | 482 | 365 | 406 | 495 | 549 | 413 | 448 |
| 25 | 348 | 438 | 484 | 363 | 407 | 493 | 548 | 414 | 451 |
| 26 | 640 | 643 | 669 | 676 | 692 | 691 | 712 | 700 | 705 |
| 27 | 317 | 324 | 347 | 367 | 240 | 382 | 338 | 368 | 373 |
| 28 | 351 | 438 | 482 | 364 | 407 | 497 | 550 | 414 | 454 |
| 29 | 567 | 588 | 618 | 633 | 632 | 624 | 662 | 655 | 654 |
| 30 | 489 | 455 | 462 | 445 | 486 | 506 | 517 | 540 | 489 |
| 31 | 517 | 481 | 506 | 523 | 530 | 574 | 526 | 549 | 550 |
| 32 | 307 | 375 | 448 | 334 | 419 | 428 | 477 | 348 | 374 |
| 33 | 351 | 443 | 484 | 365 | 411 | 497 | 549 | 413 | 454 |
| 34 | 582 | 563 | 638 | 603 | 634 | 610 | 669 | 624 | 635 |
| 35 | 505 | 501 | 514 | 534 | 571 | 551 | 551 | 555 | 560 |
| 36 | 644 | 642 | 659 | 674 | 691 | 686 | 708 | 693 | 695 |
| 37 | 311 | 387 | 414 | 310 | 366 | 465 | 481 | 331 | 395 |
| 38 | 346 | 347 | 389 | 393 | 282 | 414 | 372 | 407 | 430 |
| 39 | 421 | 434 | 440 | 439 | 464 | 515 | 511 | 493 | 478 |
| 40 | 328 | 403 | 459 | 345 | 372 | 463 | 511 | 386 | 423 |
| 41 | 659 | 651 | 678 | 693 | 714 | 709 | 722 | 725 | 724 |
| 42 | 578 | 557 | 631 | 600 | 627 | 608 | 654 | 628 | 629 |
| 43 | 350 | 435 | 482 | 363 | 408 | 496 | 546 | 407 | 451 |
| 44 | 500 | 501 | 492 | 501 | 532 | 582 | 559 | 495 | 516 |
| 45 | 311 | 346 | 296 | 285 | 292 | 409 | 370 | 322 | 348 |
| 46 | 266 | 202 | 219 | 163 | 243 | 268 | 213 | 205 | 207 |
| 47 | 335 | 416 | 454 | 350 | 386 | 473 | 519 | 404 | 439 |
| 48 | 349 | 439 | 480 | 362 | 403 | 494 | 544 | 412 | 448 |
| 49 | 473 | 300 | 362 | 282 | 396 | 387 | 334 | 345 | 342 |
| 50 | 655 | 661 | 680 | 693 | 707 | 710 | 718 | 719 | 723 |
| 51 | 534 | 527 | 506 | 525 | 553 | 614 | 569 | 518 | 541 |
| 52 | 365 | 349 | 378 | 298 | 354 | 415 | 394 | 394 | 417 |
| 53 | 642 | 619 | 667 | 632 | 691 | 654 | 681 | 701 | 695 |
| 54 | 509 | 592 | 592 | 578 | 574 | 625 | 610 | 585 | 553 |

|    |     |     |     |     |     |     |     |     |     |
|----|-----|-----|-----|-----|-----|-----|-----|-----|-----|
| 1  |     |     |     |     |     |     |     |     |     |
| 2  | 579 | 578 | 578 | 622 | 631 | 633 | 622 | 633 | 650 |
| 3  | 644 | 645 | 653 | 672 | 687 | 697 | 706 | 682 | 686 |
| 4  | 475 | 478 | 524 | 530 | 507 | 551 | 586 | 555 | 571 |
| 5  | 350 | 434 | 480 | 363 | 401 | 494 | 543 | 414 | 446 |
| 6  | 653 | 652 | 672 | 688 | 698 | 710 | 716 | 709 | 715 |
| 7  | 625 | 629 | 658 | 672 | 692 | 675 | 679 | 693 | 700 |
| 8  |     |     |     |     |     |     |     |     |     |
| 9  |     |     |     |     |     |     |     |     |     |
| 10 |     |     |     |     |     |     |     |     |     |
| 11 |     |     |     |     |     |     |     |     |     |
| 12 |     |     |     |     |     |     |     |     |     |
| 13 |     |     |     |     |     |     |     |     |     |
| 14 |     |     |     |     |     |     |     |     |     |
| 15 |     |     |     |     |     |     |     |     |     |
| 16 |     |     |     |     |     |     |     |     |     |
| 17 |     |     |     |     |     |     |     |     |     |
| 18 |     |     |     |     |     |     |     |     |     |
| 19 |     |     |     |     |     |     |     |     |     |
| 20 |     |     |     |     |     |     |     |     |     |
| 21 |     |     |     |     |     |     |     |     |     |
| 22 |     |     |     |     |     |     |     |     |     |
| 23 |     |     |     |     |     |     |     |     |     |
| 24 |     |     |     |     |     |     |     |     |     |
| 25 |     |     |     |     |     |     |     |     |     |
| 26 |     |     |     |     |     |     |     |     |     |
| 27 |     |     |     |     |     |     |     |     |     |
| 28 |     |     |     |     |     |     |     |     |     |
| 29 |     |     |     |     |     |     |     |     |     |
| 30 |     |     |     |     |     |     |     |     |     |
| 31 |     |     |     |     |     |     |     |     |     |
| 32 |     |     |     |     |     |     |     |     |     |
| 33 |     |     |     |     |     |     |     |     |     |
| 34 |     |     |     |     |     |     |     |     |     |
| 35 |     |     |     |     |     |     |     |     |     |
| 36 |     |     |     |     |     |     |     |     |     |
| 37 |     |     |     |     |     |     |     |     |     |
| 38 |     |     |     |     |     |     |     |     |     |
| 39 |     |     |     |     |     |     |     |     |     |
| 40 |     |     |     |     |     |     |     |     |     |
| 41 |     |     |     |     |     |     |     |     |     |
| 42 |     |     |     |     |     |     |     |     |     |
| 43 |     |     |     |     |     |     |     |     |     |
| 44 |     |     |     |     |     |     |     |     |     |
| 45 |     |     |     |     |     |     |     |     |     |
| 46 |     |     |     |     |     |     |     |     |     |
| 47 |     |     |     |     |     |     |     |     |     |
| 48 |     |     |     |     |     |     |     |     |     |
| 49 |     |     |     |     |     |     |     |     |     |
| 50 |     |     |     |     |     |     |     |     |     |
| 51 |     |     |     |     |     |     |     |     |     |
| 52 |     |     |     |     |     |     |     |     |     |
| 53 |     |     |     |     |     |     |     |     |     |
| 54 |     |     |     |     |     |     |     |     |     |
| 55 |     |     |     |     |     |     |     |     |     |
| 56 |     |     |     |     |     |     |     |     |     |
| 57 |     |     |     |     |     |     |     |     |     |
| 58 |     |     |     |     |     |     |     |     |     |
| 59 |     |     |     |     |     |     |     |     |     |
| 60 |     |     |     |     |     |     |     |     |     |

For peer review only

1  
2  
3  
4  
5  
6  
7  
8  
9  
10  
11  
12  
13  
14  
15  
16  
17  
18  
19  
20  
21  
22  
23  
24  
25  
26  
27  
28  
29  
30  
31  
32  
33  
34  
35  
36  
37  
38  
39  
40  
41  
42  
43  
44  
45  
46  
47  
48  
49  
50  
51  
52  
53  
54  
55  
56  
57  
58  
59  
60

| RN5 | RDU | RBV | RA7 | REF | RAL | RKB | RTR | RJZ |
|-----|-----|-----|-----|-----|-----|-----|-----|-----|
| 733 | 738 | 751 | 759 | 763 | 765 | 796 | 807 | 809 |
| 621 | 577 | 621 | 628 | 591 | 602 | 649 | 659 | 625 |
| 334 | 288 | 423 | 343 | 305 | 348 | 397 | 400 | 394 |
| 138 | 100 | 198 | 232 | 188 | 163 | 184 | 208 | 145 |
| 410 | 391 | 405 | 410 | 380 | 422 | 419 | 458 | 387 |
| 713 | 697 | 733 | 723 | 716 | 723 | 757 | 780 | 771 |
| 665 | 648 | 698 | 676 | 662 | 684 | 715 | 736 | 741 |
| 733 | 728 | 742 | 749 | 757 | 752 | 776 | 797 | 800 |
| 548 | 537 | 578 | 573 | 572 | 524 | 598 | 656 | 573 |
| 645 | 628 | 661 | 670 | 676 | 655 | 703 | 710 | 711 |
| 396 | 348 | 448 | 403 | 340 | 387 | 429 | 453 | 423 |
| 159 | 119 | 231 | 284 | 224 | 187 | 210 | 244 | 165 |
| 636 | 652 | 632 | 640 | 656 | 677 | 676 | 697 | 663 |
| 710 | 707 | 736 | 725 | 709 | 728 | 759 | 782 | 764 |
| 454 | 432 | 547 | 467 | 419 | 472 | 508 | 536 | 495 |
| 455 | 433 | 547 | 467 | 422 | 469 | 502 | 535 | 497 |
| 722 | 708 | 733 | 735 | 729 | 733 | 765 | 787 | 782 |
| 350 | 289 | 359 | 429 | 309 | 280 | 370 | 423 | 341 |
| 458 | 432 | 549 | 468 | 422 | 470 | 503 | 534 | 491 |
| 644 | 654 | 666 | 631 | 666 | 673 | 699 | 684 | 734 |
| 479 | 495 | 536 | 522 | 542 | 520 | 526 | 595 | 509 |
| 543 | 540 | 579 | 559 | 534 | 557 | 608 | 633 | 595 |
| 410 | 393 | 403 | 413 | 379 | 427 | 429 | 457 | 382 |
| 456 | 433 | 547 | 467 | 423 | 473 | 508 | 536 | 492 |
| 638 | 652 | 631 | 638 | 656 | 675 | 673 | 696 | 667 |
| 578 | 586 | 598 | 588 | 579 | 578 | 615 | 606 | 625 |
| 714 | 713 | 732 | 734 | 729 | 747 | 755 | 772 | 781 |
| 387 | 385 | 474 | 416 | 369 | 419 | 450 | 467 | 430 |
| 393 | 321 | 397 | 472 | 339 | 310 | 414 | 464 | 376 |
| 477 | 454 | 512 | 514 | 477 | 498 | 532 | 531 | 554 |
| 431 | 411 | 514 | 425 | 401 | 439 | 481 | 496 | 462 |
| 720 | 731 | 753 | 747 | 757 | 762 | 782 | 797 | 801 |
| 634 | 641 | 625 | 635 | 650 | 656 | 672 | 673 | 663 |
| 455 | 430 | 546 | 469 | 420 | 472 | 507 | 534 | 486 |
| 546 | 557 | 519 | 595 | 551 | 556 | 624 | 579 | 605 |
| 327 | 341 | 376 | 365 | 363 | 376 | 390 | 357 | 413 |
| 154 | 200 | 269 | 227 | 211 | 238 | 243 | 264 | 233 |
| 447 | 422 | 532 | 439 | 403 | 439 | 477 | 514 | 475 |
| 457 | 430 | 545 | 468 | 420 | 470 | 504 | 529 | 493 |
| 280 | 367 | 480 | 334 | 383 | 379 | 395 | 426 | 412 |
| 727 | 732 | 746 | 751 | 752 | 758 | 785 | 804 | 800 |
| 578 | 585 | 553 | 624 | 588 | 592 | 638 | 601 | 633 |
| 328 | 352 | 421 | 399 | 352 | 380 | 436 | 406 | 413 |
| 673 | 672 | 704 | 696 | 720 | 719 | 731 | 760 | 756 |
| 578 | 667 | 615 | 628 | 620 | 677 | 611 | 660 | 706 |

|    |     |     |     |     |     |     |     |     |     |
|----|-----|-----|-----|-----|-----|-----|-----|-----|-----|
| 1  |     |     |     |     |     |     |     |     |     |
| 2  | 630 | 647 | 678 | 666 | 638 | 652 | 704 | 725 | 702 |
| 3  | 709 | 712 | 714 | 728 | 728 | 738 | 769 | 758 | 778 |
| 4  | 521 | 516 | 543 | 607 | 542 | 558 | 629 | 594 | 603 |
| 5  | 452 | 428 | 540 | 465 | 421 | 469 | 505 | 527 | 488 |
| 6  | 723 | 729 | 752 | 744 | 742 | 752 | 776 | 796 | 794 |
| 7  | 708 | 705 | 728 | 708 | 717 | 718 | 748 | 768 | 765 |
| 8  |     |     |     |     |     |     |     |     |     |
| 9  |     |     |     |     |     |     |     |     |     |
| 10 |     |     |     |     |     |     |     |     |     |
| 11 |     |     |     |     |     |     |     |     |     |
| 12 |     |     |     |     |     |     |     |     |     |
| 13 |     |     |     |     |     |     |     |     |     |
| 14 |     |     |     |     |     |     |     |     |     |
| 15 |     |     |     |     |     |     |     |     |     |
| 16 |     |     |     |     |     |     |     |     |     |
| 17 |     |     |     |     |     |     |     |     |     |
| 18 |     |     |     |     |     |     |     |     |     |
| 19 |     |     |     |     |     |     |     |     |     |
| 20 |     |     |     |     |     |     |     |     |     |
| 21 |     |     |     |     |     |     |     |     |     |
| 22 |     |     |     |     |     |     |     |     |     |
| 23 |     |     |     |     |     |     |     |     |     |
| 24 |     |     |     |     |     |     |     |     |     |
| 25 |     |     |     |     |     |     |     |     |     |
| 26 |     |     |     |     |     |     |     |     |     |
| 27 |     |     |     |     |     |     |     |     |     |
| 28 |     |     |     |     |     |     |     |     |     |
| 29 |     |     |     |     |     |     |     |     |     |
| 30 |     |     |     |     |     |     |     |     |     |
| 31 |     |     |     |     |     |     |     |     |     |
| 32 |     |     |     |     |     |     |     |     |     |
| 33 |     |     |     |     |     |     |     |     |     |
| 34 |     |     |     |     |     |     |     |     |     |
| 35 |     |     |     |     |     |     |     |     |     |
| 36 |     |     |     |     |     |     |     |     |     |
| 37 |     |     |     |     |     |     |     |     |     |
| 38 |     |     |     |     |     |     |     |     |     |
| 39 |     |     |     |     |     |     |     |     |     |
| 40 |     |     |     |     |     |     |     |     |     |
| 41 |     |     |     |     |     |     |     |     |     |
| 42 |     |     |     |     |     |     |     |     |     |
| 43 |     |     |     |     |     |     |     |     |     |
| 44 |     |     |     |     |     |     |     |     |     |
| 45 |     |     |     |     |     |     |     |     |     |
| 46 |     |     |     |     |     |     |     |     |     |
| 47 |     |     |     |     |     |     |     |     |     |
| 48 |     |     |     |     |     |     |     |     |     |
| 49 |     |     |     |     |     |     |     |     |     |
| 50 |     |     |     |     |     |     |     |     |     |
| 51 |     |     |     |     |     |     |     |     |     |
| 52 |     |     |     |     |     |     |     |     |     |
| 53 |     |     |     |     |     |     |     |     |     |
| 54 |     |     |     |     |     |     |     |     |     |
| 55 |     |     |     |     |     |     |     |     |     |
| 56 |     |     |     |     |     |     |     |     |     |
| 57 |     |     |     |     |     |     |     |     |     |
| 58 |     |     |     |     |     |     |     |     |     |
| 59 |     |     |     |     |     |     |     |     |     |
| 60 |     |     |     |     |     |     |     |     |     |

For peer review only

1  
2  
3  
4  
5  
6  
7  
8  
9  
10  
11  
12  
13  
14  
15  
16  
17  
18  
19  
20  
21  
22  
23  
24  
25  
26  
27  
28  
29  
30  
31  
32  
33  
34  
35  
36  
37  
38  
39  
40  
41  
42  
43  
44  
45  
46  
47  
48  
49  
50  
51  
52  
53  
54  
55  
56  
57  
58  
59  
60

| RHM | RTG | R1H | RK9 | RXW | RR8 | RWP | RWF | RJE |
|-----|-----|-----|-----|-----|-----|-----|-----|-----|
| 839 | 852 | 887 | 916 | 928 | 956 | 962 | 962 | 971 |
| 694 | 692 | 708 | 743 | 765 | 778 | 777 | 734 | 849 |
| 462 | 433 | 427 | 412 | 401 | 543 | 385 | 346 | 458 |
| 206 | 224 | 251 | 220 | 225 | 293 | 209 | 277 | 251 |
| 506 | 482 | 454 | 516 | 458 | 644 | 454 | 430 | 532 |
| 796 | 815 | 869 | 869 | 906 | 906 | 921 | 937 | 934 |
| 727 | 763 | 819 | 798 | 848 | 855 | 867 | 876 | 893 |
| 827 | 842 | 880 | 904 | 922 | 936 | 955 | 946 | 963 |
| 631 | 623 | 617 | 684 | 671 | 712 | 743 | 717 | 679 |
| 742 | 754 | 791 | 795 | 827 | 852 | 822 | 839 | 853 |
| 552 | 470 | 470 | 467 | 439 | 616 | 456 | 401 | 530 |
| 248 | 258 | 285 | 253 | 267 | 349 | 253 | 332 | 282 |
| 725 | 722 | 772 | 797 | 816 | 834 | 809 | 832 | 851 |
| 802 | 808 | 860 | 862 | 891 | 924 | 913 | 922 | 936 |
| 636 | 563 | 531 | 570 | 528 | 736 | 549 | 486 | 613 |
| 637 | 564 | 534 | 574 | 528 | 740 | 550 | 485 | 611 |
| 802 | 827 | 855 | 875 | 896 | 928 | 925 | 935 | 943 |
| 353 | 416 | 534 | 440 | 525 | 380 | 496 | 488 | 533 |
| 637 | 561 | 534 | 574 | 528 | 739 | 551 | 487 | 615 |
| 710 | 753 | 786 | 780 | 794 | 831 | 827 | 860 | 845 |
| 549 | 586 | 614 | 647 | 692 | 647 | 727 | 690 | 695 |
| 590 | 647 | 716 | 657 | 731 | 709 | 698 | 724 | 749 |
| 503 | 486 | 457 | 512 | 453 | 648 | 457 | 436 | 522 |
| 638 | 561 | 533 | 575 | 530 | 741 | 551 | 488 | 614 |
| 725 | 728 | 778 | 799 | 807 | 831 | 806 | 831 | 847 |
| 640 | 675 | 679 | 711 | 710 | 737 | 748 | 760 | 779 |
| 790 | 821 | 858 | 885 | 894 | 925 | 938 | 937 | 935 |
| 575 | 489 | 479 | 506 | 469 | 660 | 479 | 413 | 529 |
| 390 | 471 | 569 | 489 | 574 | 434 | 546 | 530 | 587 |
| 555 | 570 | 651 | 591 | 630 | 635 | 597 | 628 | 658 |
| 590 | 542 | 486 | 541 | 506 | 695 | 518 | 471 | 560 |
| 822 | 833 | 877 | 900 | 915 | 945 | 958 | 950 | 957 |
| 720 | 722 | 765 | 794 | 801 | 825 | 804 | 827 | 844 |
| 633 | 562 | 527 | 573 | 529 | 737 | 550 | 487 | 609 |
| 606 | 603 | 677 | 646 | 674 | 739 | 619 | 677 | 751 |
| 383 | 395 | 543 | 387 | 446 | 439 | 447 | 433 | 468 |
| 276 | 273 | 333 | 220 | 277 | 345 | 300 | 226 | 322 |
| 619 | 549 | 510 | 549 | 500 | 721 | 527 | 475 | 586 |
| 635 | 561 | 527 | 567 | 527 | 735 | 546 | 488 | 611 |
| 426 | 465 | 502 | 375 | 453 | 514 | 552 | 414 | 612 |
| 826 | 845 | 876 | 903 | 926 | 950 | 962 | 956 | 966 |
| 647 | 624 | 717 | 693 | 718 | 786 | 660 | 710 | 773 |
| 395 | 425 | 572 | 428 | 490 | 483 | 441 | 460 | 541 |
| 774 | 792 | 836 | 860 | 873 | 895 | 909 | 875 | 894 |
| 640 | 685 | 780 | 722 | 767 | 781 | 801 | 882 | 754 |

|    |     |     |     |     |     |     |     |     |     |
|----|-----|-----|-----|-----|-----|-----|-----|-----|-----|
| 1  |     |     |     |     |     |     |     |     |     |
| 2  | 714 | 773 | 793 | 800 | 841 | 839 | 851 | 883 | 863 |
| 3  | 805 | 827 | 841 | 868 | 877 | 925 | 920 | 926 | 949 |
| 4  | 602 | 641 | 683 | 738 | 706 | 739 | 675 | 708 | 720 |
| 5  | 632 | 562 | 518 | 566 | 526 | 733 | 549 | 484 | 606 |
| 6  | 821 | 843 | 869 | 903 | 905 | 939 | 958 | 948 | 960 |
| 7  | 796 | 806 | 837 | 860 | 894 | 900 | 931 | 922 | 915 |
| 8  |     |     |     |     |     |     |     |     |     |
| 9  |     |     |     |     |     |     |     |     |     |
| 10 |     |     |     |     |     |     |     |     |     |
| 11 |     |     |     |     |     |     |     |     |     |
| 12 |     |     |     |     |     |     |     |     |     |
| 13 |     |     |     |     |     |     |     |     |     |
| 14 |     |     |     |     |     |     |     |     |     |
| 15 |     |     |     |     |     |     |     |     |     |
| 16 |     |     |     |     |     |     |     |     |     |
| 17 |     |     |     |     |     |     |     |     |     |
| 18 |     |     |     |     |     |     |     |     |     |
| 19 |     |     |     |     |     |     |     |     |     |
| 20 |     |     |     |     |     |     |     |     |     |
| 21 |     |     |     |     |     |     |     |     |     |
| 22 |     |     |     |     |     |     |     |     |     |
| 23 |     |     |     |     |     |     |     |     |     |
| 24 |     |     |     |     |     |     |     |     |     |
| 25 |     |     |     |     |     |     |     |     |     |
| 26 |     |     |     |     |     |     |     |     |     |
| 27 |     |     |     |     |     |     |     |     |     |
| 28 |     |     |     |     |     |     |     |     |     |
| 29 |     |     |     |     |     |     |     |     |     |
| 30 |     |     |     |     |     |     |     |     |     |
| 31 |     |     |     |     |     |     |     |     |     |
| 32 |     |     |     |     |     |     |     |     |     |
| 33 |     |     |     |     |     |     |     |     |     |
| 34 |     |     |     |     |     |     |     |     |     |
| 35 |     |     |     |     |     |     |     |     |     |
| 36 |     |     |     |     |     |     |     |     |     |
| 37 |     |     |     |     |     |     |     |     |     |
| 38 |     |     |     |     |     |     |     |     |     |
| 39 |     |     |     |     |     |     |     |     |     |
| 40 |     |     |     |     |     |     |     |     |     |
| 41 |     |     |     |     |     |     |     |     |     |
| 42 |     |     |     |     |     |     |     |     |     |
| 43 |     |     |     |     |     |     |     |     |     |
| 44 |     |     |     |     |     |     |     |     |     |
| 45 |     |     |     |     |     |     |     |     |     |
| 46 |     |     |     |     |     |     |     |     |     |
| 47 |     |     |     |     |     |     |     |     |     |
| 48 |     |     |     |     |     |     |     |     |     |
| 49 |     |     |     |     |     |     |     |     |     |
| 50 |     |     |     |     |     |     |     |     |     |
| 51 |     |     |     |     |     |     |     |     |     |
| 52 |     |     |     |     |     |     |     |     |     |
| 53 |     |     |     |     |     |     |     |     |     |
| 54 |     |     |     |     |     |     |     |     |     |
| 55 |     |     |     |     |     |     |     |     |     |
| 56 |     |     |     |     |     |     |     |     |     |
| 57 |     |     |     |     |     |     |     |     |     |
| 58 |     |     |     |     |     |     |     |     |     |
| 59 |     |     |     |     |     |     |     |     |     |
| 60 |     |     |     |     |     |     |     |     |     |

For peer review only

1  
2  
3  
4  
5  
6  
7  
8  
9  
10  
11  
12  
13  
14  
15  
16  
17  
18  
19  
20  
21  
22  
23  
24  
25  
26  
27  
28  
29  
30  
31  
32  
33  
34  
35  
36  
37  
38  
39  
40  
41  
42  
43  
44  
45  
46  
47  
48  
49  
50  
51  
52  
53  
54  
55  
56  
57  
58  
59  
60

| RGT | RWA  | RJ1  | RRV  | RH8  | RVV  | RM1  | RTD  | RTE  |
|-----|------|------|------|------|------|------|------|------|
| 977 | 1004 | 1034 | 1033 | 1047 | 1053 | 1207 | 1315 | 1320 |
| 795 | 845  | 855  | 805  | 821  | 821  | 955  | 1047 | 1057 |
| 494 | 561  | 468  | 506  | 444  | 412  | 494  | 678  | 515  |
| 254 | 261  | 255  | 200  | 244  | 212  | 298  | 301  | 345  |
| 574 | 584  | 551  | 511  | 583  | 594  | 643  | 804  | 685  |
| 944 | 975  | 1010 | 1013 | 995  | 1001 | 1149 | 1257 | 1269 |
| 893 | 912  | 955  | 965  | 914  | 908  | 1079 | 1183 | 1173 |
| 955 | 997  | 1026 | 1015 | 1029 | 1041 | 1190 | 1297 | 1319 |
| 747 | 745  | 782  | 773  | 817  | 754  | 902  | 956  | 1002 |
| 845 | 892  | 927  | 915  | 919  | 901  | 1019 | 1162 | 1141 |
| 584 | 629  | 529  | 565  | 542  | 483  | 573  | 744  | 616  |
| 312 | 320  | 301  | 234  | 306  | 273  | 354  | 356  | 406  |
| 873 | 888  | 895  | 865  | 878  | 926  | 1063 | 1142 | 1153 |
| 946 | 978  | 1006 | 998  | 1012 | 1003 | 1146 | 1246 | 1261 |
| 678 | 750  | 631  | 659  | 648  | 600  | 707  | 903  | 753  |
| 676 | 751  | 633  | 658  | 645  | 607  | 708  | 901  | 752  |
| 956 | 990  | 1011 | 1007 | 1029 | 996  | 1155 | 1274 | 1283 |
| 486 | 509  | 517  | 526  | 448  | 477  | 576  | 523  | 685  |
| 682 | 750  | 632  | 661  | 648  | 604  | 708  | 907  | 754  |
| 853 | 848  | 913  | 900  | 890  | 922  | 1043 | 1122 | 1100 |
| 676 | 631  | 774  | 704  | 788  | 705  | 857  | 929  | 937  |
| 722 | 758  | 760  | 781  | 754  | 760  | 860  | 963  | 931  |
| 576 | 588  | 550  | 515  | 579  | 596  | 645  | 817  | 689  |
| 680 | 751  | 633  | 663  | 652  | 603  | 711  | 905  | 751  |
| 871 | 884  | 884  | 860  | 874  | 928  | 1060 | 1135 | 1137 |
| 741 | 776  | 788  | 798  | 808  | 798  | 932  | 992  | 1026 |
| 948 | 974  | 1002 | 1003 | 1016 | 994  | 1164 | 1256 | 1279 |
| 595 | 655  | 586  | 594  | 573  | 516  | 616  | 806  | 649  |
| 541 | 561  | 553  | 558  | 498  | 566  | 636  | 578  | 772  |
| 622 | 688  | 749  | 759  | 668  | 637  | 748  | 836  | 871  |
| 645 | 700  | 596  | 610  | 599  | 573  | 662  | 849  | 687  |
| 963 | 1002 | 1029 | 1026 | 1032 | 1043 | 1197 | 1304 | 1313 |
| 863 | 885  | 883  | 858  | 867  | 928  | 1047 | 1129 | 1141 |
| 676 | 751  | 623  | 662  | 646  | 603  | 710  | 901  | 750  |
| 767 | 680  | 785  | 861  | 778  | 659  | 913  | 916  | 865  |
| 455 | 481  | 552  | 590  | 438  | 399  | 480  | 538  | 584  |
| 277 | 281  | 409  | 357  | 288  | 299  | 331  | 492  | 358  |
| 657 | 736  | 610  | 640  | 626  | 584  | 689  | 871  | 725  |
| 678 | 749  | 633  | 657  | 643  | 597  | 704  | 903  | 753  |
| 451 | 468  | 593  | 542  | 510  | 574  | 574  | 781  | 665  |
| 966 | 999  | 1040 | 1036 | 1046 | 1042 | 1201 | 1292 | 1315 |
| 794 | 701  | 817  | 902  | 816  | 716  | 959  | 955  | 896  |
| 436 | 596  | 609  | 612  | 495  | 483  | 627  | 690  | 606  |
| 887 | 941  | 963  | 953  | 955  | 983  | 1133 | 1222 | 1212 |
| 880 | 748  | 930  | 940  | 901  | 893  | 958  | 1149 | 1011 |

|    |     |     |      |      |      |      |      |      |      |
|----|-----|-----|------|------|------|------|------|------|------|
| 1  |     |     |      |      |      |      |      |      |      |
| 2  | 900 | 915 | 902  | 922  | 913  | 918  | 1067 | 1156 | 1149 |
| 3  | 949 | 971 | 1002 | 1013 | 1013 | 987  | 1160 | 1257 | 1242 |
| 4  | 724 | 783 | 817  | 801  | 853  | 724  | 961  | 939  | 1031 |
| 5  | 668 | 742 | 632  | 654  | 643  | 594  | 699  | 896  | 750  |
| 6  | 964 | 997 | 1028 | 1022 | 1030 | 1025 | 1195 | 1288 | 1300 |
| 7  | 935 | 965 | 986  | 968  | 1001 | 1010 | 1150 | 1233 | 1272 |
| 8  |     |     |      |      |      |      |      |      |      |
| 9  |     |     |      |      |      |      |      |      |      |
| 10 |     |     |      |      |      |      |      |      |      |
| 11 |     |     |      |      |      |      |      |      |      |
| 12 |     |     |      |      |      |      |      |      |      |
| 13 |     |     |      |      |      |      |      |      |      |
| 14 |     |     |      |      |      |      |      |      |      |
| 15 |     |     |      |      |      |      |      |      |      |
| 16 |     |     |      |      |      |      |      |      |      |
| 17 |     |     |      |      |      |      |      |      |      |
| 18 |     |     |      |      |      |      |      |      |      |
| 19 |     |     |      |      |      |      |      |      |      |
| 20 |     |     |      |      |      |      |      |      |      |
| 21 |     |     |      |      |      |      |      |      |      |
| 22 |     |     |      |      |      |      |      |      |      |
| 23 |     |     |      |      |      |      |      |      |      |
| 24 |     |     |      |      |      |      |      |      |      |
| 25 |     |     |      |      |      |      |      |      |      |
| 26 |     |     |      |      |      |      |      |      |      |
| 27 |     |     |      |      |      |      |      |      |      |
| 28 |     |     |      |      |      |      |      |      |      |
| 29 |     |     |      |      |      |      |      |      |      |
| 30 |     |     |      |      |      |      |      |      |      |
| 31 |     |     |      |      |      |      |      |      |      |
| 32 |     |     |      |      |      |      |      |      |      |
| 33 |     |     |      |      |      |      |      |      |      |
| 34 |     |     |      |      |      |      |      |      |      |
| 35 |     |     |      |      |      |      |      |      |      |
| 36 |     |     |      |      |      |      |      |      |      |
| 37 |     |     |      |      |      |      |      |      |      |
| 38 |     |     |      |      |      |      |      |      |      |
| 39 |     |     |      |      |      |      |      |      |      |
| 40 |     |     |      |      |      |      |      |      |      |
| 41 |     |     |      |      |      |      |      |      |      |
| 42 |     |     |      |      |      |      |      |      |      |
| 43 |     |     |      |      |      |      |      |      |      |
| 44 |     |     |      |      |      |      |      |      |      |
| 45 |     |     |      |      |      |      |      |      |      |
| 46 |     |     |      |      |      |      |      |      |      |
| 47 |     |     |      |      |      |      |      |      |      |
| 48 |     |     |      |      |      |      |      |      |      |
| 49 |     |     |      |      |      |      |      |      |      |
| 50 |     |     |      |      |      |      |      |      |      |
| 51 |     |     |      |      |      |      |      |      |      |
| 52 |     |     |      |      |      |      |      |      |      |
| 53 |     |     |      |      |      |      |      |      |      |
| 54 |     |     |      |      |      |      |      |      |      |
| 55 |     |     |      |      |      |      |      |      |      |
| 56 |     |     |      |      |      |      |      |      |      |
| 57 |     |     |      |      |      |      |      |      |      |
| 58 |     |     |      |      |      |      |      |      |      |
| 59 |     |     |      |      |      |      |      |      |      |
| 60 |     |     |      |      |      |      |      |      |      |

For peer review only



1  
2  
3  
4  
5  
6  
7  
8  
9  
10  
11  
12  
13  
14  
15  
16  
17  
18  
19  
20  
21  
22  
23  
24  
25  
26  
27  
28  
29  
30  
31  
32  
33  
34  
35  
36  
37  
38  
39  
40  
41  
42  
43  
44  
45  
46  
47  
48  
49  
50  
51  
52  
53  
54  
55  
56  
57  
58  
59  
60

|  | <b>RWE</b> | <b>RTH</b> | <b>RHQ</b> | <b>RPY</b> |
|--|------------|------------|------------|------------|
|  | 1421       | 1428       | 1494       | 1920       |
|  | 1146       | 1117       | 1258       | 1471       |
|  | 725        | 617        | 685        | 670        |
|  | 391        | 424        | 375        | 537        |
|  | 751        | 817        | 767        | 709        |
|  | 1358       | 1380       | 1436       | 1893       |
|  | 1290       | 1283       | 1356       | 1803       |
|  | 1396       | 1400       | 1471       | 1894       |
|  | 1047       | 1085       | 1102       | 1485       |
|  | 1257       | 1272       | 1336       | 1750       |
|  | 803        | 725        | 779        | 719        |
|  | 450        | 519        | 441        | 620        |
|  | 1212       | 1241       | 1222       | 1664       |
|  | 1356       | 1370       | 1438       | 1870       |
|  | 952        | 893        | 912        | 892        |
|  | 948        | 892        | 912        | 894        |
|  | 1366       | 1382       | 1446       | 1898       |
|  | 714        | 564        | 706        | 1036       |
|  | 950        | 893        | 917        | 890        |
|  | 1269       | 1230       | 1285       | 1639       |
|  | 1062       | 1033       | 1033       | 1347       |
|  | 1059       | 1025       | 1125       | 1528       |
|  | 759        | 815        | 764        | 712        |
|  | 951        | 897        | 911        | 893        |
|  | 1210       | 1241       | 1216       | 1665       |
|  | 1098       | 1126       | 1154       | 1494       |
|  | 1358       | 1375       | 1442       | 1877       |
|  | 835        | 779        | 826        | 772        |
|  | 782        | 624        | 779        | 1119       |
|  | 944        | 920        | 1058       | 1358       |
|  | 903        | 831        | 855        | 821        |
|  | 1399       | 1413       | 1481       | 1911       |
|  | 1210       | 1238       | 1199       | 1654       |
|  | 953        | 889        | 909        | 886        |
|  | 965        | 990        | 1096       | 1561       |
|  | 680        | 624        | 739        | 1110       |
|  | 462        | 392        | 543        | 562        |
|  | 921        | 860        | 889        | 861        |
|  | 947        | 892        | 904        | 889        |
|  | 750        | 638        | 879        | 960        |
|  | 1396       | 1420       | 1478       | 1938       |
|  | 997        | 1041       | 1123       | 1642       |
|  | 792        | 629        | 894        | 1031       |
|  | 1312       | 1295       | 1385       | 1786       |
|  | 1309       | 1274       | 1180       | 1743       |

|    |      |      |      |      |
|----|------|------|------|------|
| 1  |      |      |      |      |
| 2  | 1259 | 1251 | 1317 | 1788 |
| 3  | 1350 | 1357 | 1422 | 1897 |
| 4  | 1015 | 1091 | 1213 | 1426 |
| 5  | 946  | 888  | 908  | 881  |
| 6  | 1385 | 1412 | 1471 | 1926 |
| 7  | 1338 | 1366 | 1421 | 1857 |
| 8  |      |      |      |      |
| 9  |      |      |      |      |
| 10 |      |      |      |      |
| 11 |      |      |      |      |
| 12 |      |      |      |      |
| 13 |      |      |      |      |
| 14 |      |      |      |      |
| 15 |      |      |      |      |
| 16 |      |      |      |      |
| 17 |      |      |      |      |
| 18 |      |      |      |      |
| 19 |      |      |      |      |
| 20 |      |      |      |      |
| 21 |      |      |      |      |
| 22 |      |      |      |      |
| 23 |      |      |      |      |
| 24 |      |      |      |      |
| 25 |      |      |      |      |
| 26 |      |      |      |      |
| 27 |      |      |      |      |
| 28 |      |      |      |      |
| 29 |      |      |      |      |
| 30 |      |      |      |      |
| 31 |      |      |      |      |
| 32 |      |      |      |      |
| 33 |      |      |      |      |
| 34 |      |      |      |      |
| 35 |      |      |      |      |
| 36 |      |      |      |      |
| 37 |      |      |      |      |
| 38 |      |      |      |      |
| 39 |      |      |      |      |
| 40 |      |      |      |      |
| 41 |      |      |      |      |
| 42 |      |      |      |      |
| 43 |      |      |      |      |
| 44 |      |      |      |      |
| 45 |      |      |      |      |
| 46 |      |      |      |      |
| 47 |      |      |      |      |
| 48 |      |      |      |      |
| 49 |      |      |      |      |
| 50 |      |      |      |      |
| 51 |      |      |      |      |
| 52 |      |      |      |      |
| 53 |      |      |      |      |
| 54 |      |      |      |      |
| 55 |      |      |      |      |
| 56 |      |      |      |      |
| 57 |      |      |      |      |
| 58 |      |      |      |      |
| 59 |      |      |      |      |
| 60 |      |      |      |      |

For peer review only

**Table 2.** Proportions of patients reporting a positive experience by question and for each of the 146 hospitals. The values correspond to the cells in Figure 2.

**Note**

Entries with NA come from hospitals which received less than 21 responses for the corresponding question.

| Questions | Hospitals |      |      |      |      |      |      |
|-----------|-----------|------|------|------|------|------|------|
|           | RQX       | RRJ  | RT3  | RMP  | RPC  | REP  | RAN  |
| Q10       | 0.71      | 0.70 | 0.81 | 0.82 | 0.74 | 0.75 | 0.73 |
| Q49       | 0.50      | 0.41 | 0.64 | 0.65 | 0.67 | 0.60 | 0.57 |
| Q35       | NA        | 0.57 | 0.62 | 0.62 | 0.42 | 0.62 | 0.59 |
| Q45       | NA        | NA   | NA   | 0.77 | NA   | NA   | NA   |
| Q26       | 0.78      | 0.74 | 0.80 | 0.81 | 0.81 | 0.83 | 0.77 |
| Q13       | 0.66      | 0.63 | 0.66 | 0.74 | 0.69 | 0.72 | 0.65 |
| Q15       | 0.48      | 0.59 | 0.66 | 0.62 | 0.57 | 0.52 | 0.41 |
| Q9        | 0.80      | 0.81 | 0.87 | 0.93 | 0.85 | 0.80 | 0.79 |
| Q1        | 0.78      | 0.62 | 0.65 | 0.73 | 0.87 | 0.80 | 0.64 |
| Q12       | 0.72      | 0.83 | 0.80 | 0.89 | 0.80 | 0.91 | 0.86 |
| Q30       | NA        | 0.52 | 0.71 | 0.76 | 0.85 | 0.80 | 0.68 |
| Q44       | NA        | NA   | NA   | 0.86 | NA   | NA   | NA   |
| Q7        | 0.74      | 0.73 | 0.83 | 0.79 | 0.75 | 0.85 | 0.70 |
| Q14       | 0.52      | 0.48 | 0.64 | 0.76 | 0.63 | 0.71 | 0.62 |
| Q34       | 0.90      | 0.96 | 0.90 | 0.93 | 0.88 | 0.97 | 0.94 |
| Q37       | NA        | 0.93 | 0.90 | 0.91 | 0.90 | 0.91 | 0.86 |
| Q16       | 0.72      | 0.73 | 0.76 | 0.84 | 0.77 | 0.77 | 0.74 |
| Q48       | NA        | NA   | NA   | NA   | NA   | NA   | NA   |
| Q31       | 0.71      | 0.71 | 0.81 | 0.81 | 0.76 | 0.80 | 0.70 |
| Q11       | 0.62      | 0.68 | 0.59 | 0.75 | 0.72 | 0.66 | 0.66 |
| Q53       | 0.76      | 0.41 | 0.60 | 0.67 | 0.72 | 0.58 | 0.51 |
| Q41       | 0.70      | NA   | 0.71 | 0.78 | 0.60 | 0.79 | 0.71 |
| Q25       | 0.83      | 0.93 | 0.94 | 0.98 | 0.95 | 0.98 | 0.90 |
| Q29       | NA        | 0.89 | 0.90 | 0.91 | 0.90 | 0.94 | 0.87 |
| Q6        | 0.89      | 0.85 | 0.91 | 0.85 | 0.93 | 0.87 | 0.67 |
| Q55       | 0.17      | 0.36 | 0.37 | 0.49 | 0.26 | 0.35 | 0.28 |
| Q54       | 0.62      | 0.47 | 0.63 | 0.69 | 0.67 | 0.61 | 0.45 |
| Q36       | 0.81      | 0.77 | 0.91 | 0.94 | 0.89 | 0.90 | 0.83 |
| Q47       | NA        | NA   | NA   | 0.86 | NA   | NA   | NA   |
| Q21       | 0.58      | 0.74 | 0.85 | 0.85 | 0.84 | 0.91 | 0.77 |
| Q38       | NA        | 0.85 | 0.85 | 0.90 | 0.90 | 0.95 | 0.84 |
| Q2        | 0.87      | 0.66 | 0.86 | 0.89 | 0.84 | 0.81 | 0.49 |
| Q5        | 1.00      | 0.96 | 0.96 | 0.97 | 0.91 | 0.96 | 0.92 |
| Q28       | NA        | 0.86 | 0.76 | 0.87 | 0.76 | 0.89 | 0.76 |
| Q19       | NA        | NA   | 0.94 | 0.93 | 0.84 | 0.88 | 0.80 |
| Q23       | NA        | NA   | NA   | 0.87 | 0.78 | 0.83 | 0.66 |
| Q51       | NA        | NA   | NA   | 0.63 | NA   | 0.24 | 0.47 |
| Q39       | NA        | 0.82 | 0.95 | 0.96 | 0.91 | 0.97 | 0.91 |
| Q32       | NA        | 0.82 | 0.77 | 0.65 | 0.78 | 0.79 | 0.76 |
| Q50       | NA        | 0.57 | 0.33 | 0.69 | 0.55 | 0.39 | 0.57 |
| Q56       | 0.83      | 0.88 | 0.96 | 0.92 | 0.90 | 0.93 | 0.82 |
| Q18       | NA        | 0.95 | 0.87 | 0.92 | 0.85 | 0.93 | 0.76 |

|    |            |      |      |      |      |      |      |      |
|----|------------|------|------|------|------|------|------|------|
| 1  |            |      |      |      |      |      |      |      |
| 2  | <b>Q22</b> | NA   | NA   | 0.50 | 0.81 | 0.46 | 0.77 | 0.67 |
| 3  | <b>Q8</b>  | 0.77 | 0.77 | 0.79 | 0.81 | 0.74 | 0.72 | 0.74 |
| 4  | <b>Q52</b> | 0.84 | 0.92 | 0.87 | 1.00 | 0.95 | 0.95 | 0.91 |
| 5  | <b>Q42</b> | 0.91 | 1.00 | 0.97 | 0.97 | 0.92 | 1.00 | 0.95 |
| 6  | <b>Q17</b> | 0.72 | 0.89 | 0.94 | 0.97 | 0.82 | 0.96 | 0.87 |
| 7  | <b>Q20</b> | NA   | 0.83 | 0.85 | 0.90 | 0.78 | 0.95 | 0.80 |
| 8  | <b>Q33</b> | 0.38 | 0.71 | 0.67 | 0.65 | 0.67 | 0.79 | 0.55 |
| 9  | <b>Q57</b> | 0.59 | 0.56 | 0.85 | 0.55 | 0.82 | 0.66 | 0.56 |
| 10 | <b>Q58</b> | 0.31 | 0.23 | 0.22 | 0.27 | 0.14 | 0.29 | 0.59 |
| 11 |            |      |      |      |      |      |      |      |
| 12 |            |      |      |      |      |      |      |      |
| 13 |            |      |      |      |      |      |      |      |
| 14 |            |      |      |      |      |      |      |      |
| 15 |            |      |      |      |      |      |      |      |
| 16 |            |      |      |      |      |      |      |      |
| 17 |            |      |      |      |      |      |      |      |
| 18 |            |      |      |      |      |      |      |      |
| 19 |            |      |      |      |      |      |      |      |
| 20 |            |      |      |      |      |      |      |      |
| 21 |            |      |      |      |      |      |      |      |
| 22 |            |      |      |      |      |      |      |      |
| 23 |            |      |      |      |      |      |      |      |
| 24 |            |      |      |      |      |      |      |      |
| 25 |            |      |      |      |      |      |      |      |
| 26 |            |      |      |      |      |      |      |      |
| 27 |            |      |      |      |      |      |      |      |
| 28 |            |      |      |      |      |      |      |      |
| 29 |            |      |      |      |      |      |      |      |
| 30 |            |      |      |      |      |      |      |      |
| 31 |            |      |      |      |      |      |      |      |
| 32 |            |      |      |      |      |      |      |      |
| 33 |            |      |      |      |      |      |      |      |
| 34 |            |      |      |      |      |      |      |      |
| 35 |            |      |      |      |      |      |      |      |
| 36 |            |      |      |      |      |      |      |      |
| 37 |            |      |      |      |      |      |      |      |
| 38 |            |      |      |      |      |      |      |      |
| 39 |            |      |      |      |      |      |      |      |
| 40 |            |      |      |      |      |      |      |      |
| 41 |            |      |      |      |      |      |      |      |
| 42 |            |      |      |      |      |      |      |      |
| 43 |            |      |      |      |      |      |      |      |
| 44 |            |      |      |      |      |      |      |      |
| 45 |            |      |      |      |      |      |      |      |
| 46 |            |      |      |      |      |      |      |      |
| 47 |            |      |      |      |      |      |      |      |
| 48 |            |      |      |      |      |      |      |      |
| 49 |            |      |      |      |      |      |      |      |
| 50 |            |      |      |      |      |      |      |      |
| 51 |            |      |      |      |      |      |      |      |
| 52 |            |      |      |      |      |      |      |      |
| 53 |            |      |      |      |      |      |      |      |
| 54 |            |      |      |      |      |      |      |      |
| 55 |            |      |      |      |      |      |      |      |
| 56 |            |      |      |      |      |      |      |      |
| 57 |            |      |      |      |      |      |      |      |
| 58 |            |      |      |      |      |      |      |      |
| 59 |            |      |      |      |      |      |      |      |
| 60 |            |      |      |      |      |      |      |      |

For peer review only

hospitals included in the analysis (CPES 2016). These

|    | <b>RGM</b> | <b>RBQ</b> | <b>R1F</b> | <b>RKE</b> | <b>RE9</b> | <b>RJ6</b> | <b>RVY</b> | <b>RA4</b> | <b>RJN</b> |
|----|------------|------------|------------|------------|------------|------------|------------|------------|------------|
| 14 | 0.85       | 0.83       | 0.76       | 0.68       | 0.71       | 0.67       | 0.72       | 0.79       | 0.77       |
| 15 | 0.71       | 0.62       | 0.55       | 0.63       | 0.65       | 0.67       | 0.50       | 0.60       | 0.63       |
| 16 | 0.58       | 0.56       | 0.53       | 0.60       | 0.66       | 0.60       | 0.43       | 0.62       | 0.56       |
| 17 | NA         | 0.64       |
| 18 | 0.81       | 0.81       | 0.78       | 0.79       | 0.67       | 0.82       | 0.79       | 0.76       | 0.79       |
| 19 | 0.79       | 0.79       | 0.67       | 0.69       | 0.75       | 0.78       | 0.73       | 0.74       | 0.68       |
| 20 | 0.60       | 0.65       | 0.59       | 0.56       | 0.62       | 0.59       | 0.60       | 0.50       | 0.58       |
| 21 | 0.96       | 0.82       | 0.86       | 0.86       | 0.90       | 0.87       | 0.79       | 0.86       | 0.89       |
| 22 | 0.80       | 0.66       | 0.74       | 0.76       | 0.78       | 0.72       | 0.79       | 0.85       | 0.78       |
| 23 | 0.94       | 0.86       | 0.76       | 0.83       | 0.82       | 0.86       | 0.81       | 0.82       | 0.83       |
| 24 | 0.85       | 0.76       | 0.75       | 0.82       | 0.72       | 0.69       | 0.64       | 0.80       | 0.74       |
| 25 | NA         | NA         | NA         | 0.82       | NA         | 0.91       | NA         | 0.91       | 0.89       |
| 26 | 0.89       | 0.74       | 0.80       | 0.78       | 0.75       | 0.78       | 0.85       | 0.75       | 0.88       |
| 27 | 0.69       | 0.69       | 0.62       | 0.73       | 0.76       | 0.71       | 0.60       | 0.76       | 0.68       |
| 28 | 0.92       | 0.84       | 0.75       | 0.91       | 0.88       | 0.87       | 0.78       | 0.85       | 0.83       |
| 29 | 0.94       | 0.89       | 0.85       | 0.93       | 0.91       | 0.87       | 0.85       | 0.91       | 0.88       |
| 30 | 0.93       | 0.81       | 0.72       | 0.75       | 0.79       | 0.75       | 0.81       | 0.85       | 0.85       |
| 31 | NA         | 0.48       | 0.61       | 0.73       | 0.73       | 0.77       | 0.73       | 0.75       | 0.71       |
| 32 | 0.75       | 0.84       | 0.76       | 0.79       | 0.74       | 0.72       | 0.71       | 0.73       | 0.82       |
| 33 | 0.80       | 0.62       | 0.66       | 0.69       | 0.75       | 0.74       | 0.79       | 0.74       | 0.81       |
| 34 | 0.63       | 0.53       | 0.59       | 0.69       | 0.61       | 0.61       | 0.55       | 0.65       | 0.63       |
| 35 | 0.71       | 0.67       | 0.72       | 0.73       | 0.78       | 0.74       | 0.76       | 0.79       | 0.72       |
| 36 | 1.00       | 1.00       | 0.96       | 0.98       | 0.89       | 0.93       | 0.94       | 0.97       | 0.92       |
| 37 | 0.94       | 0.84       | 0.88       | 0.84       | 0.80       | 0.84       | 0.88       | 0.81       | 0.91       |
| 38 | 0.92       | 0.88       | 0.86       | 0.89       | 0.95       | 0.89       | 0.89       | 0.88       | 0.94       |
| 39 | 0.42       | 0.38       | 0.37       | 0.43       | 0.37       | 0.42       | 0.27       | 0.31       | 0.35       |
| 40 | 0.76       | 0.56       | 0.55       | 0.68       | 0.72       | 0.65       | 0.62       | 0.71       | 0.69       |
| 41 | 0.96       | 0.87       | 0.88       | 0.92       | 0.82       | 0.83       | 0.80       | 0.84       | 0.88       |
| 42 | NA         | NA         | 0.84       | 0.86       | 0.95       | 0.88       | 0.77       | 0.91       | 0.87       |
| 43 | 0.91       | 0.70       | 0.72       | 0.86       | 0.88       | 0.86       | 0.80       | 0.83       | 0.90       |
| 44 | 0.94       | 0.92       | 0.86       | 0.90       | 0.77       | 0.86       | 0.68       | 0.76       | 0.90       |
| 45 | 0.94       | 0.85       | 0.83       | 0.86       | 0.88       | 0.84       | 0.84       | 0.91       | 0.89       |
| 46 | 0.96       | 0.93       | 0.91       | 0.91       | 0.97       | 0.89       | 0.95       | 0.97       | 0.95       |
| 47 | 0.85       | 0.65       | 0.77       | 0.84       | 0.79       | 0.75       | 0.87       | 0.86       | 0.86       |
| 48 | 0.96       | 0.81       | 0.88       | 0.91       | 0.93       | 0.94       | 0.95       | 0.94       | 0.94       |
| 49 | 0.77       | 0.78       | 0.82       | 0.93       | 0.84       | 0.70       | 0.73       | 0.82       | 0.76       |
| 50 | 0.41       | 0.45       | 0.42       | 0.41       | 0.55       | 0.34       | 0.38       | 0.44       | 0.63       |
| 51 | 0.96       | 0.90       | 0.90       | 0.96       | 0.96       | 0.90       | 0.79       | 0.92       | 0.98       |
| 52 | 0.81       | 0.79       | 0.63       | 0.68       | 0.68       | 0.68       | 0.48       | 0.63       | 0.82       |
| 53 | 0.43       | 0.56       | 0.47       | 0.48       | 0.55       | 0.46       | 0.42       | 0.52       | 0.58       |
| 54 | 0.96       | 0.94       | 0.85       | 0.95       | 0.95       | 0.91       | 0.93       | 0.90       | 0.90       |
| 55 | 0.90       | 0.90       | 0.84       | 0.90       | 0.96       | 0.97       | 0.82       | 0.89       | 0.94       |

|    |      |      |      |      |      |      |      |      |      |
|----|------|------|------|------|------|------|------|------|------|
| 1  |      |      |      |      |      |      |      |      |      |
| 2  | 0.62 | 0.52 | 0.50 | 0.83 | 0.64 | 0.46 | 0.39 | 0.70 | 0.55 |
| 3  | 0.87 | 0.79 | 0.74 | 0.79 | 0.90 | 0.81 | 0.70 | 0.83 | 0.78 |
| 4  | 0.95 | 0.94 | 0.93 | 0.93 | 0.99 | 0.95 | 0.97 | 0.97 | 0.97 |
| 5  | 0.98 | 0.96 | 0.94 | 0.96 | 0.97 | 0.97 | 1.00 | 0.98 | 0.97 |
| 6  | 0.91 | 0.90 | 0.90 | 0.97 | 0.96 | 0.88 | 0.84 | 0.88 | 0.94 |
| 7  | 0.92 | 0.74 | 0.81 | 0.96 | 0.86 | 0.88 | 0.82 | 0.86 | 0.87 |
| 8  | 0.83 | 0.70 | 0.55 | 0.72 | 0.77 | 0.49 | 0.71 | 0.69 | 0.71 |
| 9  | 0.78 | 0.68 | 0.77 | 0.68 | 0.82 | 0.70 | 0.70 | 0.84 | 0.72 |
| 10 | 0.78 | 0.68 | 0.77 | 0.68 | 0.82 | 0.70 | 0.70 | 0.84 | 0.72 |
| 11 | 0.51 | 0.34 | 0.07 | 0.38 | 0.24 | 0.28 | 0.11 | 0.25 | 0.24 |
| 12 |      |      |      |      |      |      |      |      |      |
| 13 |      |      |      |      |      |      |      |      |      |
| 14 |      |      |      |      |      |      |      |      |      |
| 15 |      |      |      |      |      |      |      |      |      |
| 16 |      |      |      |      |      |      |      |      |      |
| 17 |      |      |      |      |      |      |      |      |      |
| 18 |      |      |      |      |      |      |      |      |      |
| 19 |      |      |      |      |      |      |      |      |      |
| 20 |      |      |      |      |      |      |      |      |      |
| 21 |      |      |      |      |      |      |      |      |      |
| 22 |      |      |      |      |      |      |      |      |      |
| 23 |      |      |      |      |      |      |      |      |      |
| 24 |      |      |      |      |      |      |      |      |      |
| 25 |      |      |      |      |      |      |      |      |      |
| 26 |      |      |      |      |      |      |      |      |      |
| 27 |      |      |      |      |      |      |      |      |      |
| 28 |      |      |      |      |      |      |      |      |      |
| 29 |      |      |      |      |      |      |      |      |      |
| 30 |      |      |      |      |      |      |      |      |      |
| 31 |      |      |      |      |      |      |      |      |      |
| 32 |      |      |      |      |      |      |      |      |      |
| 33 |      |      |      |      |      |      |      |      |      |
| 34 |      |      |      |      |      |      |      |      |      |
| 35 |      |      |      |      |      |      |      |      |      |
| 36 |      |      |      |      |      |      |      |      |      |
| 37 |      |      |      |      |      |      |      |      |      |
| 38 |      |      |      |      |      |      |      |      |      |
| 39 |      |      |      |      |      |      |      |      |      |
| 40 |      |      |      |      |      |      |      |      |      |
| 41 |      |      |      |      |      |      |      |      |      |
| 42 |      |      |      |      |      |      |      |      |      |
| 43 |      |      |      |      |      |      |      |      |      |
| 44 |      |      |      |      |      |      |      |      |      |
| 45 |      |      |      |      |      |      |      |      |      |
| 46 |      |      |      |      |      |      |      |      |      |
| 47 |      |      |      |      |      |      |      |      |      |
| 48 |      |      |      |      |      |      |      |      |      |
| 49 |      |      |      |      |      |      |      |      |      |
| 50 |      |      |      |      |      |      |      |      |      |
| 51 |      |      |      |      |      |      |      |      |      |
| 52 |      |      |      |      |      |      |      |      |      |
| 53 |      |      |      |      |      |      |      |      |      |
| 54 |      |      |      |      |      |      |      |      |      |
| 55 |      |      |      |      |      |      |      |      |      |
| 56 |      |      |      |      |      |      |      |      |      |
| 57 |      |      |      |      |      |      |      |      |      |
| 58 |      |      |      |      |      |      |      |      |      |
| 59 |      |      |      |      |      |      |      |      |      |
| 60 |      |      |      |      |      |      |      |      |      |

For peer review only

1  
2  
3  
4  
5  
6  
7  
8  
9  
10  
11  
12  
13  
14  
15  
16  
17  
18  
19  
20  
21  
22  
23  
24  
25  
26  
27  
28  
29  
30  
31  
32  
33  
34  
35  
36  
37  
38  
39  
40  
41  
42  
43  
44  
45  
46  
47  
48  
49  
50  
51  
52  
53  
54  
55  
56  
57  
58  
59  
60

|  | <b>RAS</b> | <b>RFR</b> | <b>RAX</b> | <b>RWW</b> | <b>RM3</b> | <b>RQM</b> | <b>RVR</b> | <b>RJR</b> | <b>RC1</b> |
|--|------------|------------|------------|------------|------------|------------|------------|------------|------------|
|  | 0.73       | 0.83       | 0.66       | 0.69       | 0.73       | 0.70       | 0.65       | 0.73       | 0.79       |
|  | 0.54       | 0.64       | 0.51       | 0.55       | 0.69       | 0.57       | 0.59       | 0.65       | 0.57       |
|  | 0.52       | 0.67       | 0.48       | 0.52       | 0.66       | 0.45       | 0.55       | 0.57       | 0.45       |
|  | 0.56       | 0.71       | NA         | 0.50       | 0.55       | 0.63       | NA         | 0.60       | 0.63       |
|  | 0.76       | 0.88       | 0.84       | 0.75       | 0.83       | 0.71       | 0.79       | 0.78       | 0.78       |
|  | 0.68       | 0.76       | 0.63       | 0.65       | 0.82       | 0.70       | 0.69       | 0.73       | 0.77       |
|  | 0.53       | 0.62       | 0.39       | 0.49       | 0.58       | 0.56       | 0.47       | 0.54       | 0.61       |
|  | 0.88       | 0.90       | 0.85       | 0.84       | 0.89       | 0.84       | 0.83       | 0.86       | 0.84       |
|  | 0.74       | 0.85       | 0.74       | 0.83       | 0.76       | 0.77       | 0.70       | 0.80       | 0.75       |
|  | 0.85       | 0.89       | 0.79       | 0.79       | 0.89       | 0.78       | 0.82       | 0.85       | 0.82       |
|  | 0.64       | 0.84       | 0.72       | 0.71       | 0.80       | 0.69       | 0.71       | 0.74       | 0.73       |
|  | 0.82       | 0.89       | NA         | 0.75       | 0.89       | 0.89       | NA         | 0.83       | 0.83       |
|  | 0.74       | 0.79       | 0.77       | 0.74       | 0.86       | 0.78       | 0.76       | 0.88       | 0.81       |
|  | 0.71       | 0.74       | 0.57       | 0.59       | 0.74       | 0.60       | 0.68       | 0.70       | 0.67       |
|  | 0.86       | 0.90       | 0.87       | 0.81       | 0.87       | 0.84       | 0.89       | 0.90       | 0.83       |
|  | 0.86       | 0.90       | 0.88       | 0.89       | 0.88       | 0.76       | 0.86       | 0.93       | 0.86       |
|  | 0.77       | 0.81       | 0.80       | 0.69       | 0.86       | 0.71       | 0.79       | 0.86       | 0.79       |
|  | 0.70       | 0.56       | 0.63       | 0.50       | 0.88       | 0.73       | 0.77       | 0.75       | 0.67       |
|  | 0.65       | 0.84       | 0.76       | 0.79       | 0.68       | 0.64       | 0.66       | 0.75       | 0.72       |
|  | 0.79       | 0.80       | 0.72       | 0.66       | 0.76       | 0.67       | 0.74       | 0.81       | 0.73       |
|  | 0.61       | 0.71       | 0.60       | 0.60       | 0.57       | 0.56       | 0.64       | 0.62       | 0.55       |
|  | 0.69       | 0.79       | 0.71       | 0.70       | 0.82       | 0.68       | 0.77       | 0.68       | 0.68       |
|  | 0.96       | 0.99       | 0.97       | 0.94       | 0.95       | 0.90       | 0.91       | 0.99       | 0.95       |
|  | 0.83       | 0.92       | 0.83       | 0.87       | 0.89       | 0.87       | 0.87       | 0.89       | 0.82       |
|  | 0.87       | 0.91       | 0.92       | 0.79       | 0.90       | 0.88       | 0.83       | 0.90       | 0.86       |
|  | 0.39       | 0.50       | 0.30       | 0.38       | 0.45       | 0.38       | 0.38       | 0.44       | 0.30       |
|  | 0.57       | 0.71       | 0.61       | 0.58       | 0.64       | 0.60       | 0.65       | 0.62       | 0.60       |
|  | 0.83       | 0.91       | 0.81       | 0.81       | 0.91       | 0.81       | 0.87       | 0.80       | 0.76       |
|  | 0.92       | 0.90       | 0.70       | 0.68       | 0.96       | 0.83       | 0.90       | 0.93       | 0.89       |
|  | 0.80       | 0.89       | 0.76       | 0.73       | 0.89       | 0.80       | 0.87       | 0.90       | 0.73       |
|  | 0.79       | 0.91       | 0.86       | 0.83       | 0.90       | 0.82       | 0.93       | 0.88       | 0.78       |
|  | 0.79       | 0.88       | 0.87       | 0.76       | 0.87       | 0.81       | 0.88       | 0.85       | 0.82       |
|  | 0.90       | 0.97       | 0.91       | 0.89       | 0.94       | 0.90       | 0.96       | 0.97       | 0.96       |
|  | 0.75       | 0.84       | 0.87       | 0.81       | 0.84       | 0.80       | 0.84       | 0.86       | 0.74       |
|  | 0.90       | 0.95       | 0.93       | 0.90       | 0.93       | 0.88       | 0.92       | 0.90       | 0.84       |
|  | 0.75       | 0.89       | 0.74       | 0.76       | 0.84       | 0.80       | 0.86       | 0.87       | 0.72       |
|  | 0.47       | 0.57       | 0.36       | 0.35       | 0.61       | 0.49       | 0.51       | 0.48       | 0.33       |
|  | 0.88       | 0.99       | 0.95       | 0.91       | 0.94       | 0.89       | 0.95       | 0.99       | 0.86       |
|  | 0.61       | 0.74       | 0.70       | 0.67       | 0.66       | 0.73       | 0.70       | 0.66       | 0.60       |
|  | 0.56       | 0.64       | 0.54       | 0.49       | 0.63       | 0.48       | 0.61       | 0.62       | 0.50       |
|  | 0.91       | 0.91       | 0.87       | 0.86       | 0.93       | 0.90       | 0.92       | 0.87       | 0.88       |
|  | 0.94       | 0.92       | 0.90       | 0.88       | 0.82       | 0.88       | 0.91       | 0.89       | 0.84       |

|    |      |      |      |      |      |      |      |      |      |
|----|------|------|------|------|------|------|------|------|------|
| 1  |      |      |      |      |      |      |      |      |      |
| 2  | 0.56 | 0.62 | 0.53 | 0.64 | 0.59 | 0.50 | 0.61 | 0.60 | 0.43 |
| 3  | 0.69 | 0.82 | 0.60 | 0.73 | 0.78 | 0.61 | 0.78 | 0.83 | 0.71 |
| 4  | 0.97 | 0.93 | 0.91 | 0.93 | 0.97 | 0.93 | 0.97 | 0.97 | 0.98 |
| 5  | 0.97 | 0.96 | 0.97 | 0.94 | 0.98 | 0.93 | 0.98 | 0.97 | 0.99 |
| 6  | 0.85 | 0.99 | 0.90 | 0.85 | 0.94 | 0.84 | 0.92 | 0.90 | 0.85 |
| 7  | 0.81 | 0.87 | 0.79 | 0.75 | 0.84 | 0.85 | 0.91 | 0.93 | 0.79 |
| 8  | 0.71 | 0.70 | 0.49 | 0.69 | 0.76 | 0.49 | 0.63 | 0.69 | 0.54 |
| 9  | 0.66 | 0.73 | 0.78 | 0.75 | 0.75 | 0.64 | 0.68 | 0.73 | 0.64 |
| 10 | 0.66 | 0.73 | 0.78 | 0.75 | 0.75 | 0.64 | 0.68 | 0.73 | 0.64 |
| 11 | 0.24 | 0.30 | 0.14 | 0.10 | 0.37 | 0.23 | 0.30 | 0.22 | 0.13 |
| 12 |      |      |      |      |      |      |      |      |      |
| 13 |      |      |      |      |      |      |      |      |      |
| 14 |      |      |      |      |      |      |      |      |      |
| 15 |      |      |      |      |      |      |      |      |      |
| 16 |      |      |      |      |      |      |      |      |      |
| 17 |      |      |      |      |      |      |      |      |      |
| 18 |      |      |      |      |      |      |      |      |      |
| 19 |      |      |      |      |      |      |      |      |      |
| 20 |      |      |      |      |      |      |      |      |      |
| 21 |      |      |      |      |      |      |      |      |      |
| 22 |      |      |      |      |      |      |      |      |      |
| 23 |      |      |      |      |      |      |      |      |      |
| 24 |      |      |      |      |      |      |      |      |      |
| 25 |      |      |      |      |      |      |      |      |      |
| 26 |      |      |      |      |      |      |      |      |      |
| 27 |      |      |      |      |      |      |      |      |      |
| 28 |      |      |      |      |      |      |      |      |      |
| 29 |      |      |      |      |      |      |      |      |      |
| 30 |      |      |      |      |      |      |      |      |      |
| 31 |      |      |      |      |      |      |      |      |      |
| 32 |      |      |      |      |      |      |      |      |      |
| 33 |      |      |      |      |      |      |      |      |      |
| 34 |      |      |      |      |      |      |      |      |      |
| 35 |      |      |      |      |      |      |      |      |      |
| 36 |      |      |      |      |      |      |      |      |      |
| 37 |      |      |      |      |      |      |      |      |      |
| 38 |      |      |      |      |      |      |      |      |      |
| 39 |      |      |      |      |      |      |      |      |      |
| 40 |      |      |      |      |      |      |      |      |      |
| 41 |      |      |      |      |      |      |      |      |      |
| 42 |      |      |      |      |      |      |      |      |      |
| 43 |      |      |      |      |      |      |      |      |      |
| 44 |      |      |      |      |      |      |      |      |      |
| 45 |      |      |      |      |      |      |      |      |      |
| 46 |      |      |      |      |      |      |      |      |      |
| 47 |      |      |      |      |      |      |      |      |      |
| 48 |      |      |      |      |      |      |      |      |      |
| 49 |      |      |      |      |      |      |      |      |      |
| 50 |      |      |      |      |      |      |      |      |      |
| 51 |      |      |      |      |      |      |      |      |      |
| 52 |      |      |      |      |      |      |      |      |      |
| 53 |      |      |      |      |      |      |      |      |      |
| 54 |      |      |      |      |      |      |      |      |      |
| 55 |      |      |      |      |      |      |      |      |      |
| 56 |      |      |      |      |      |      |      |      |      |
| 57 |      |      |      |      |      |      |      |      |      |
| 58 |      |      |      |      |      |      |      |      |      |
| 59 |      |      |      |      |      |      |      |      |      |
| 60 |      |      |      |      |      |      |      |      |      |

For peer review only



1  
2  
3  
4  
5  
6  
7  
8  
9  
10  
11  
12  
13  
14  
15  
16  
17  
18  
19  
20  
21  
22  
23  
24  
25  
26  
27  
28  
29  
30  
31  
32  
33  
34  
35  
36  
37  
38  
39  
40  
41  
42  
43  
44  
45  
46  
47  
48  
49  
50  
51  
52  
53  
54  
55  
56  
57  
58  
59  
60

|  | <b>RFF</b> | <b>RJ2</b> | <b>RA3</b> | <b>RBT</b> | <b>REN</b> | <b>RRF</b> | <b>RAP</b> | <b>RMC</b> | <b>RLQ</b> |
|--|------------|------------|------------|------------|------------|------------|------------|------------|------------|
|  | 0.76       | 0.66       | 0.71       | 0.73       | 0.74       | 0.70       | 0.64       | 0.81       | 0.76       |
|  | 0.63       | 0.52       | 0.56       | 0.63       | 0.59       | 0.59       | 0.48       | 0.65       | 0.62       |
|  | 0.54       | 0.56       | 0.40       | 0.51       | 0.62       | 0.54       | 0.45       | 0.69       | 0.47       |
|  | 0.63       | 0.61       | NA         | 0.68       | 0.58       | 0.72       | 0.51       | 0.64       | 0.60       |
|  | 0.82       | 0.73       | 0.80       | 0.81       | 0.83       | 0.78       | 0.67       | 0.83       | 0.75       |
|  | 0.75       | 0.72       | 0.65       | 0.73       | 0.70       | 0.74       | 0.60       | 0.79       | 0.74       |
|  | 0.58       | 0.53       | 0.48       | 0.59       | 0.63       | 0.57       | 0.48       | 0.69       | 0.59       |
|  | 0.90       | 0.84       | 0.79       | 0.87       | 0.83       | 0.84       | 0.77       | 0.92       | 0.88       |
|  | 0.77       | 0.73       | 0.71       | 0.82       | 0.79       | 0.84       | 0.69       | 0.81       | 0.84       |
|  | 0.84       | 0.81       | 0.75       | 0.82       | 0.88       | 0.80       | 0.73       | 0.93       | 0.86       |
|  | 0.78       | 0.78       | 0.63       | 0.70       | 0.77       | 0.76       | 0.66       | 0.82       | 0.65       |
|  | 0.93       | 0.86       | 0.89       | 0.80       | 0.87       | 0.93       | 0.85       | 0.92       | 0.84       |
|  | 0.81       | 0.76       | 0.74       | 0.78       | 0.81       | 0.79       | 0.64       | 0.84       | 0.84       |
|  | 0.68       | 0.64       | 0.61       | 0.69       | 0.64       | 0.65       | 0.56       | 0.73       | 0.63       |
|  | 0.89       | 0.82       | 0.85       | 0.89       | 0.89       | 0.88       | 0.76       | 0.91       | 0.78       |
|  | 0.93       | 0.81       | 0.89       | 0.87       | 0.93       | 0.89       | 0.75       | 0.91       | 0.80       |
|  | 0.82       | 0.78       | 0.72       | 0.83       | 0.80       | 0.77       | 0.62       | 0.86       | 0.81       |
|  | 0.76       | 0.73       | 0.62       | 0.76       | 0.64       | 0.69       | 0.54       | 0.72       | 0.72       |
|  | 0.86       | 0.72       | 0.77       | 0.77       | 0.78       | 0.84       | 0.55       | 0.81       | 0.70       |
|  | 0.72       | 0.77       | 0.71       | 0.72       | 0.73       | 0.75       | 0.67       | 0.84       | 0.75       |
|  | 0.63       | 0.52       | 0.45       | 0.71       | 0.67       | 0.69       | 0.52       | 0.69       | 0.73       |
|  | 0.79       | 0.71       | 0.67       | 0.71       | 0.69       | 0.70       | 0.56       | 0.81       | 0.69       |
|  | 1.00       | 0.96       | 0.94       | 0.99       | 0.96       | 0.97       | 0.95       | 0.98       | 0.94       |
|  | 0.92       | 0.80       | 0.85       | 0.81       | 0.84       | 0.89       | 0.69       | 0.91       | 0.82       |
|  | 0.92       | 0.87       | 0.85       | 0.91       | 0.88       | 0.93       | 0.85       | 0.92       | 0.89       |
|  | 0.41       | 0.31       | 0.28       | 0.32       | 0.37       | 0.41       | 0.40       | 0.26       | 0.32       |
|  | 0.70       | 0.54       | 0.58       | 0.73       | 0.68       | 0.67       | 0.49       | 0.71       | 0.68       |
|  | 0.88       | 0.86       | 0.86       | 0.85       | 0.80       | 0.85       | 0.69       | 0.88       | 0.83       |
|  | 0.89       | 0.86       | 0.85       | 0.86       | 0.82       | 0.86       | 0.72       | 0.91       | 0.87       |
|  | 0.85       | 0.81       | 0.82       | 0.78       | 0.86       | 0.84       | 0.76       | 0.88       | 0.76       |
|  | 0.91       | 0.84       | 0.84       | 0.87       | 0.84       | 0.82       | 0.77       | 0.91       | 0.84       |
|  | 0.85       | 0.82       | 0.81       | 0.88       | 0.86       | 0.89       | 0.79       | 0.93       | 0.86       |
|  | 0.94       | 0.91       | 0.91       | 0.95       | 0.95       | 0.91       | 0.92       | 0.93       | 0.96       |
|  | 0.90       | 0.75       | 0.79       | 0.82       | 0.83       | 0.85       | 0.65       | 0.83       | 0.76       |
|  | 0.88       | 0.87       | 0.92       | 0.89       | 0.90       | 0.89       | 0.83       | 0.94       | 0.92       |
|  | 0.90       | 0.83       | 0.86       | 0.82       | 0.80       | 0.84       | 0.82       | 0.81       | 0.77       |
|  | 0.54       | 0.44       | 0.34       | 0.45       | 0.51       | 0.52       | 0.25       | 0.57       | 0.65       |
|  | 0.96       | 0.97       | 0.93       | 0.97       | 0.95       | 0.93       | 0.87       | 0.94       | 0.90       |
|  | 0.78       | 0.62       | 0.67       | 0.60       | 0.72       | 0.72       | 0.55       | 0.75       | 0.77       |
|  | 0.61       | 0.46       | 0.43       | 0.63       | 0.60       | 0.55       | 0.49       | 0.59       | 0.67       |
|  | 0.93       | 0.88       | 0.88       | 0.91       | 0.93       | 0.90       | 0.83       | 0.95       | 0.91       |
|  | 0.91       | 0.84       | 0.88       | 0.88       | 0.92       | 0.87       | 0.86       | 0.94       | 0.87       |

|    |      |      |      |      |      |      |      |      |      |
|----|------|------|------|------|------|------|------|------|------|
| 1  |      |      |      |      |      |      |      |      |      |
| 2  | 0.62 | 0.62 | 0.69 | 0.54 | 0.61 | 0.51 | 0.56 | 0.63 | 0.55 |
| 3  | 0.74 | 0.72 | 0.75 | 0.75 | 0.77 | 0.87 | 0.71 | 0.88 | 0.74 |
| 4  | 0.95 | 0.92 | 0.98 | 0.93 | 0.95 | 0.97 | 0.90 | 0.97 | 0.95 |
| 5  | 0.96 | 0.95 | 0.97 | 0.96 | 0.96 | 0.95 | 0.92 | 0.98 | 0.97 |
| 6  | 0.89 | 0.95 | 0.90 | 0.93 | 0.88 | 0.91 | 0.91 | 0.92 | 0.89 |
| 7  | 0.88 | 0.84 | 0.83 | 0.83 | 0.91 | 0.86 | 0.84 | 0.91 | 0.84 |
| 8  | 0.65 | 0.63 | 0.74 | 0.78 | 0.65 | 0.80 | 0.39 | 0.75 | 0.70 |
| 9  | 0.81 | 0.69 | 0.71 | 0.75 | 0.76 | 0.86 | 0.50 | 0.81 | 0.74 |
| 10 | 0.81 | 0.69 | 0.71 | 0.75 | 0.76 | 0.86 | 0.50 | 0.81 | 0.74 |
| 11 | 0.18 | 0.18 | 0.27 | 0.15 | 0.20 | 0.17 | 0.26 | 0.16 | 0.28 |
| 12 |      |      |      |      |      |      |      |      |      |
| 13 |      |      |      |      |      |      |      |      |      |
| 14 |      |      |      |      |      |      |      |      |      |
| 15 |      |      |      |      |      |      |      |      |      |
| 16 |      |      |      |      |      |      |      |      |      |
| 17 |      |      |      |      |      |      |      |      |      |
| 18 |      |      |      |      |      |      |      |      |      |
| 19 |      |      |      |      |      |      |      |      |      |
| 20 |      |      |      |      |      |      |      |      |      |
| 21 |      |      |      |      |      |      |      |      |      |
| 22 |      |      |      |      |      |      |      |      |      |
| 23 |      |      |      |      |      |      |      |      |      |
| 24 |      |      |      |      |      |      |      |      |      |
| 25 |      |      |      |      |      |      |      |      |      |
| 26 |      |      |      |      |      |      |      |      |      |
| 27 |      |      |      |      |      |      |      |      |      |
| 28 |      |      |      |      |      |      |      |      |      |
| 29 |      |      |      |      |      |      |      |      |      |
| 30 |      |      |      |      |      |      |      |      |      |
| 31 |      |      |      |      |      |      |      |      |      |
| 32 |      |      |      |      |      |      |      |      |      |
| 33 |      |      |      |      |      |      |      |      |      |
| 34 |      |      |      |      |      |      |      |      |      |
| 35 |      |      |      |      |      |      |      |      |      |
| 36 |      |      |      |      |      |      |      |      |      |
| 37 |      |      |      |      |      |      |      |      |      |
| 38 |      |      |      |      |      |      |      |      |      |
| 39 |      |      |      |      |      |      |      |      |      |
| 40 |      |      |      |      |      |      |      |      |      |
| 41 |      |      |      |      |      |      |      |      |      |
| 42 |      |      |      |      |      |      |      |      |      |
| 43 |      |      |      |      |      |      |      |      |      |
| 44 |      |      |      |      |      |      |      |      |      |
| 45 |      |      |      |      |      |      |      |      |      |
| 46 |      |      |      |      |      |      |      |      |      |
| 47 |      |      |      |      |      |      |      |      |      |
| 48 |      |      |      |      |      |      |      |      |      |
| 49 |      |      |      |      |      |      |      |      |      |
| 50 |      |      |      |      |      |      |      |      |      |
| 51 |      |      |      |      |      |      |      |      |      |
| 52 |      |      |      |      |      |      |      |      |      |
| 53 |      |      |      |      |      |      |      |      |      |
| 54 |      |      |      |      |      |      |      |      |      |
| 55 |      |      |      |      |      |      |      |      |      |
| 56 |      |      |      |      |      |      |      |      |      |
| 57 |      |      |      |      |      |      |      |      |      |
| 58 |      |      |      |      |      |      |      |      |      |
| 59 |      |      |      |      |      |      |      |      |      |
| 60 |      |      |      |      |      |      |      |      |      |

For peer review only

1  
2  
3  
4  
5  
6  
7  
8  
9  
10  
11  
12  
13  
14  
15  
16  
17  
18  
19  
20  
21  
22  
23  
24  
25  
26  
27  
28  
29  
30  
31  
32  
33  
34  
35  
36  
37  
38  
39  
40  
41  
42  
43  
44  
45  
46  
47  
48  
49  
50  
51  
52  
53  
54  
55  
56  
57  
58  
59  
60

| RLT  | RDZ  | RBK  | RQQ  | RBN  | RDD  | RFS  | RTK  | RCF  |
|------|------|------|------|------|------|------|------|------|
| 0.76 | 0.82 | 0.75 | 0.72 | 0.81 | 0.71 | 0.68 | 0.67 | 0.73 |
| 0.65 | 0.73 | 0.55 | 0.55 | 0.71 | 0.52 | 0.60 | 0.54 | 0.57 |
| 0.55 | 0.58 | 0.50 | 0.49 | 0.66 | 0.55 | 0.49 | 0.43 | 0.53 |
| 0.60 | 0.69 | 0.47 | 0.65 | 0.90 | 0.57 | 0.62 | 0.72 | 0.50 |
| 0.77 | 0.82 | 0.77 | 0.79 | 0.85 | 0.78 | 0.77 | 0.75 | 0.78 |
| 0.76 | 0.76 | 0.68 | 0.67 | 0.76 | 0.69 | 0.72 | 0.66 | 0.71 |
| 0.58 | 0.62 | 0.52 | 0.51 | 0.65 | 0.52 | 0.56 | 0.48 | 0.53 |
| 0.82 | 0.90 | 0.81 | 0.82 | 0.91 | 0.84 | 0.86 | 0.84 | 0.82 |
| 0.72 | 0.87 | 0.77 | 0.73 | 0.88 | 0.79 | 0.84 | 0.80 | 0.79 |
| 0.85 | 0.86 | 0.80 | 0.80 | 0.84 | 0.80 | 0.80 | 0.78 | 0.82 |
| 0.81 | 0.81 | 0.73 | 0.71 | 0.78 | 0.68 | 0.72 | 0.69 | 0.66 |
| 0.81 | 0.83 | 0.75 | 0.68 | 0.96 | 0.85 | 0.96 | 0.90 | 0.90 |
| 0.79 | 0.80 | 0.72 | 0.79 | 0.83 | 0.77 | 0.80 | 0.77 | 0.74 |
| 0.68 | 0.75 | 0.62 | 0.66 | 0.66 | 0.60 | 0.68 | 0.61 | 0.64 |
| 0.85 | 0.88 | 0.82 | 0.86 | 0.92 | 0.84 | 0.87 | 0.89 | 0.90 |
| 0.83 | 0.92 | 0.84 | 0.91 | 0.91 | 0.83 | 0.88 | 0.88 | 0.83 |
| 0.79 | 0.83 | 0.73 | 0.79 | 0.81 | 0.77 | 0.80 | 0.70 | 0.77 |
| 0.81 | 0.70 | 0.65 | 0.69 | 0.63 | 0.62 | 0.72 | 0.69 | 0.64 |
| 0.70 | 0.77 | 0.68 | 0.75 | 0.75 | 0.70 | 0.73 | 0.72 | 0.68 |
| 0.74 | 0.77 | 0.70 | 0.74 | 0.73 | 0.74 | 0.73 | 0.72 | 0.78 |
| 0.54 | 0.62 | 0.56 | 0.62 | 0.67 | 0.55 | 0.71 | 0.59 | 0.70 |
| 0.80 | 0.80 | 0.65 | 0.70 | 0.71 | 0.69 | 0.74 | 0.63 | 0.73 |
| 0.97 | 0.97 | 0.96 | 0.93 | 0.98 | 0.97 | 0.93 | 0.97 | 0.95 |
| 0.84 | 0.92 | 0.81 | 0.86 | 0.93 | 0.79 | 0.84 | 0.82 | 0.85 |
| 0.88 | 0.92 | 0.86 | 0.88 | 0.91 | 0.87 | 0.91 | 0.88 | 0.90 |
| 0.40 | 0.34 | 0.40 | 0.27 | 0.35 | 0.32 | 0.35 | 0.33 | 0.38 |
| 0.65 | 0.74 | 0.58 | 0.66 | 0.68 | 0.58 | 0.68 | 0.64 | 0.61 |
| 0.83 | 0.85 | 0.76 | 0.84 | 0.87 | 0.88 | 0.82 | 0.83 | 0.77 |
| 0.92 | 0.81 | 0.76 | 0.78 | 0.89 | 0.86 | 0.90 | 0.80 | 0.80 |
| 0.84 | 0.83 | 0.82 | 0.76 | 0.87 | 0.80 | 0.84 | 0.77 | 0.81 |
| 0.87 | 0.91 | 0.84 | 0.82 | 0.89 | 0.82 | 0.85 | 0.83 | 0.86 |
| 0.85 | 0.91 | 0.82 | 0.88 | 0.91 | 0.86 | 0.89 | 0.84 | 0.90 |
| 0.94 | 0.94 | 0.94 | 0.93 | 0.93 | 0.93 | 0.93 | 0.96 | 0.96 |
| 0.76 | 0.92 | 0.78 | 0.75 | 0.90 | 0.76 | 0.80 | 0.84 | 0.88 |
| 0.94 | 0.95 | 0.85 | 0.91 | 0.94 | 0.88 | 0.89 | 0.87 | 0.90 |
| 0.91 | 0.86 | 0.82 | 0.78 | 0.86 | 0.81 | 0.79 | 0.82 | 0.79 |
| 0.50 | 0.57 | 0.31 | 0.53 | 0.53 | 0.47 | 0.47 | 0.41 | 0.47 |
| 0.91 | 0.97 | 0.94 | 0.95 | 0.96 | 0.88 | 0.94 | 0.88 | 0.93 |
| 0.63 | 0.76 | 0.66 | 0.68 | 0.78 | 0.64 | 0.65 | 0.67 | 0.55 |
| 0.53 | 0.64 | 0.42 | 0.61 | 0.57 | 0.55 | 0.55 | 0.44 | 0.62 |
| 0.95 | 0.94 | 0.85 | 0.90 | 0.91 | 0.94 | 0.93 | 0.89 | 0.92 |
| 0.93 | 0.92 | 0.84 | 0.93 | 0.92 | 0.86 | 0.91 | 0.88 | 0.92 |

|    |      |      |      |      |      |      |      |      |      |
|----|------|------|------|------|------|------|------|------|------|
| 1  |      |      |      |      |      |      |      |      |      |
| 2  | 0.61 | 0.52 | 0.70 | 0.50 | 0.63 | 0.60 | 0.44 | 0.44 | 0.63 |
| 3  | 0.73 | 0.89 | 0.74 | 0.73 | 0.73 | 0.73 | 0.74 | 0.70 | 0.78 |
| 4  | 0.97 | 0.97 | 0.92 | 0.95 | 0.96 | 0.94 | 0.96 | 0.97 | 0.98 |
| 5  | 0.98 | 0.99 | 0.92 | 0.96 | 0.98 | 0.95 | 0.96 | 0.95 | 0.98 |
| 6  | 0.92 | 0.93 | 0.89 | 0.89 | 0.90 | 0.90 | 0.83 | 0.89 | 0.86 |
| 7  | 0.86 | 0.90 | 0.83 | 0.83 | 0.92 | 0.78 | 0.86 | 0.77 | 0.86 |
| 8  | 0.66 | 0.73 | 0.67 | 0.53 | 0.71 | 0.56 | 0.72 | 0.72 | 0.72 |
| 9  | 0.77 | 0.77 | 0.64 | 0.75 | 0.82 | 0.79 | 0.66 | 0.76 | 0.57 |
| 10 | 0.77 | 0.77 | 0.64 | 0.75 | 0.82 | 0.79 | 0.66 | 0.76 | 0.57 |
| 11 | 0.29 | 0.19 | 0.29 | 0.25 | 0.11 | 0.13 | 0.20 | 0.18 | 0.31 |
| 12 |      |      |      |      |      |      |      |      |      |
| 13 |      |      |      |      |      |      |      |      |      |
| 14 |      |      |      |      |      |      |      |      |      |
| 15 |      |      |      |      |      |      |      |      |      |
| 16 |      |      |      |      |      |      |      |      |      |
| 17 |      |      |      |      |      |      |      |      |      |
| 18 |      |      |      |      |      |      |      |      |      |
| 19 |      |      |      |      |      |      |      |      |      |
| 20 |      |      |      |      |      |      |      |      |      |
| 21 |      |      |      |      |      |      |      |      |      |
| 22 |      |      |      |      |      |      |      |      |      |
| 23 |      |      |      |      |      |      |      |      |      |
| 24 |      |      |      |      |      |      |      |      |      |
| 25 |      |      |      |      |      |      |      |      |      |
| 26 |      |      |      |      |      |      |      |      |      |
| 27 |      |      |      |      |      |      |      |      |      |
| 28 |      |      |      |      |      |      |      |      |      |
| 29 |      |      |      |      |      |      |      |      |      |
| 30 |      |      |      |      |      |      |      |      |      |
| 31 |      |      |      |      |      |      |      |      |      |
| 32 |      |      |      |      |      |      |      |      |      |
| 33 |      |      |      |      |      |      |      |      |      |
| 34 |      |      |      |      |      |      |      |      |      |
| 35 |      |      |      |      |      |      |      |      |      |
| 36 |      |      |      |      |      |      |      |      |      |
| 37 |      |      |      |      |      |      |      |      |      |
| 38 |      |      |      |      |      |      |      |      |      |
| 39 |      |      |      |      |      |      |      |      |      |
| 40 |      |      |      |      |      |      |      |      |      |
| 41 |      |      |      |      |      |      |      |      |      |
| 42 |      |      |      |      |      |      |      |      |      |
| 43 |      |      |      |      |      |      |      |      |      |
| 44 |      |      |      |      |      |      |      |      |      |
| 45 |      |      |      |      |      |      |      |      |      |
| 46 |      |      |      |      |      |      |      |      |      |
| 47 |      |      |      |      |      |      |      |      |      |
| 48 |      |      |      |      |      |      |      |      |      |
| 49 |      |      |      |      |      |      |      |      |      |
| 50 |      |      |      |      |      |      |      |      |      |
| 51 |      |      |      |      |      |      |      |      |      |
| 52 |      |      |      |      |      |      |      |      |      |
| 53 |      |      |      |      |      |      |      |      |      |
| 54 |      |      |      |      |      |      |      |      |      |
| 55 |      |      |      |      |      |      |      |      |      |
| 56 |      |      |      |      |      |      |      |      |      |
| 57 |      |      |      |      |      |      |      |      |      |
| 58 |      |      |      |      |      |      |      |      |      |
| 59 |      |      |      |      |      |      |      |      |      |
| 60 |      |      |      |      |      |      |      |      |      |

For peer review only

1  
2  
3  
4  
5  
6  
7  
8  
9  
10  
11  
12  
13  
14  
15  
16  
17  
18  
19  
20  
21  
22  
23  
24  
25  
26  
27  
28  
29  
30  
31  
32  
33  
34  
35  
36  
37  
38  
39  
40  
41  
42  
43  
44  
45  
46  
47  
48  
49  
50  
51  
52  
53  
54  
55  
56  
57  
58  
59  
60

| <b>RWG</b> | <b>REM</b> | <b>RJF</b> | <b>RQW</b> | <b>RCB</b> | <b>RF4</b> | <b>RK5</b> | <b>RCD</b> | <b>RBZ</b> |
|------------|------------|------------|------------|------------|------------|------------|------------|------------|
| 0.74       | 0.72       | 0.72       | 0.76       | 0.76       | 0.76       | 0.66       | 0.77       | 0.73       |
| 0.59       | 0.57       | 0.58       | 0.54       | 0.60       | 0.50       | 0.55       | 0.62       | 0.57       |
| 0.49       | 0.49       | 0.52       | 0.54       | 0.57       | 0.49       | 0.45       | 0.63       | 0.58       |
| 0.63       | 0.47       | 0.55       | 0.59       | 0.65       | 0.50       | 0.42       | 0.57       | 0.43       |
| 0.79       | 0.77       | 0.79       | 0.80       | 0.82       | 0.76       | 0.72       | 0.81       | 0.78       |
| 0.69       | 0.70       | 0.69       | 0.68       | 0.75       | 0.70       | 0.67       | 0.75       | 0.73       |
| 0.47       | 0.52       | 0.53       | 0.48       | 0.61       | 0.53       | 0.56       | 0.60       | 0.52       |
| 0.83       | 0.84       | 0.86       | 0.84       | 0.89       | 0.86       | 0.79       | 0.89       | 0.85       |
| 0.83       | 0.80       | 0.76       | 0.81       | 0.80       | 0.82       | 0.81       | 0.81       | 0.77       |
| 0.81       | 0.86       | 0.81       | 0.82       | 0.87       | 0.81       | 0.76       | 0.85       | 0.79       |
| 0.66       | 0.76       | 0.62       | 0.68       | 0.77       | 0.74       | 0.75       | 0.84       | 0.73       |
| 0.85       | 0.80       | 0.92       | 0.73       | 0.87       | 0.79       | 0.76       | 0.82       | 0.83       |
| 0.79       | 0.81       | 0.77       | 0.83       | 0.83       | 0.78       | 0.69       | 0.85       | 0.82       |
| 0.62       | 0.62       | 0.62       | 0.60       | 0.76       | 0.67       | 0.63       | 0.76       | 0.68       |
| 0.85       | 0.89       | 0.89       | 0.84       | 0.84       | 0.86       | 0.88       | 0.89       | 0.89       |
| 0.88       | 0.87       | 0.88       | 0.87       | 0.88       | 0.85       | 0.90       | 0.88       | 0.92       |
| 0.77       | 0.77       | 0.77       | 0.79       | 0.81       | 0.73       | 0.71       | 0.85       | 0.80       |
| 0.69       | 0.58       | 0.66       | 0.70       | 0.66       | 0.59       | 0.55       | 0.77       | 0.67       |
| 0.74       | 0.74       | 0.76       | 0.71       | 0.73       | 0.66       | 0.80       | 0.74       | 0.81       |
| 0.74       | 0.64       | 0.72       | 0.73       | 0.79       | 0.74       | 0.69       | 0.87       | 0.78       |
| 0.64       | 0.61       | 0.58       | 0.65       | 0.68       | 0.56       | 0.54       | 0.66       | 0.71       |
| 0.71       | 0.65       | 0.77       | 0.67       | 0.74       | 0.67       | 0.65       | 0.82       | 0.71       |
| 0.98       | 0.94       | 0.98       | 0.96       | 0.97       | 0.96       | 0.94       | 0.99       | 0.96       |
| 0.87       | 0.88       | 0.83       | 0.83       | 0.89       | 0.85       | 0.86       | 0.87       | 0.86       |
| 0.86       | 0.92       | 0.87       | 0.91       | 0.94       | 0.84       | 0.85       | 0.93       | 0.92       |
| 0.31       | 0.33       | 0.28       | 0.31       | 0.40       | 0.36       | 0.28       | 0.43       | 0.27       |
| 0.58       | 0.68       | 0.64       | 0.58       | 0.62       | 0.55       | 0.61       | 0.70       | 0.71       |
| 0.82       | 0.80       | 0.85       | 0.80       | 0.84       | 0.80       | 0.83       | 0.84       | 0.88       |
| 0.82       | 0.84       | 0.86       | 0.84       | 0.86       | 0.82       | 0.83       | 0.90       | 0.84       |
| 0.78       | 0.76       | 0.81       | 0.79       | 0.85       | 0.77       | 0.70       | 0.92       | 0.81       |
| 0.86       | 0.84       | 0.84       | 0.85       | 0.89       | 0.84       | 0.81       | 0.91       | 0.84       |
| 0.84       | 0.86       | 0.85       | 0.85       | 0.87       | 0.81       | 0.90       | 0.90       | 0.87       |
| 0.93       | 0.93       | 0.94       | 0.94       | 0.94       | 0.91       | 0.94       | 0.96       | 0.98       |
| 0.80       | 0.87       | 0.85       | 0.72       | 0.86       | 0.78       | 0.83       | 0.87       | 0.78       |
| 0.93       | 0.88       | 0.90       | 0.88       | 0.92       | 0.84       | 0.85       | 0.92       | 0.91       |
| 0.85       | 0.88       | 0.71       | 0.76       | 0.86       | 0.80       | 0.77       | 0.93       | 0.85       |
| 0.51       | 0.51       | 0.41       | 0.40       | 0.49       | 0.29       | 0.28       | 0.67       | 0.51       |
| 0.92       | 0.94       | 0.94       | 0.90       | 0.98       | 0.93       | 0.94       | 0.96       | 0.95       |
| 0.66       | 0.59       | 0.68       | 0.57       | 0.63       | 0.65       | 0.67       | 0.72       | 0.65       |
| 0.58       | 0.64       | 0.45       | 0.49       | 0.59       | 0.41       | 0.38       | 0.71       | 0.69       |
| 0.87       | 0.91       | 0.92       | 0.90       | 0.92       | 0.91       | 0.87       | 0.98       | 0.95       |
| 0.89       | 0.89       | 0.84       | 0.86       | 0.87       | 0.85       | 0.85       | 0.93       | 0.95       |

|    |      |      |      |      |      |      |      |      |      |
|----|------|------|------|------|------|------|------|------|------|
| 1  |      |      |      |      |      |      |      |      |      |
| 2  | 0.57 | 0.55 | 0.53 | 0.50 | 0.69 | 0.47 | 0.42 | 0.86 | 0.59 |
| 3  | 0.73 | 0.75 | 0.82 | 0.72 | 0.73 | 0.73 | 0.78 | 0.77 | 0.78 |
| 4  | 0.96 | 0.94 | 0.97 | 0.94 | 0.98 | 0.90 | 0.96 | 0.97 | 0.97 |
| 5  | 0.94 | 0.97 | 0.96 | 0.94 | 0.96 | 0.97 | 0.97 | 0.99 | 0.97 |
| 6  | 0.90 | 0.89 | 0.91 | 0.91 | 0.92 | 0.94 | 0.87 | 0.97 | 0.91 |
| 7  | 0.89 | 0.80 | 0.74 | 0.81 | 0.87 | 0.71 | 0.72 | 0.92 | 0.83 |
| 8  | 0.68 | 0.69 | 0.72 | 0.62 | 0.68 | 0.52 | 0.82 | 0.82 | 0.85 |
| 9  | 0.64 | 0.70 | 0.49 | 0.70 | 0.77 | 0.64 | 0.61 | 0.84 | 0.71 |
| 10 | 0.64 | 0.70 | 0.49 | 0.70 | 0.77 | 0.64 | 0.61 | 0.84 | 0.71 |
| 11 | 0.12 | 0.20 | 0.27 | 0.27 | 0.24 | 0.23 | 0.19 | 0.24 | 0.23 |
| 12 |      |      |      |      |      |      |      |      |      |
| 13 |      |      |      |      |      |      |      |      |      |
| 14 |      |      |      |      |      |      |      |      |      |
| 15 |      |      |      |      |      |      |      |      |      |
| 16 |      |      |      |      |      |      |      |      |      |
| 17 |      |      |      |      |      |      |      |      |      |
| 18 |      |      |      |      |      |      |      |      |      |
| 19 |      |      |      |      |      |      |      |      |      |
| 20 |      |      |      |      |      |      |      |      |      |
| 21 |      |      |      |      |      |      |      |      |      |
| 22 |      |      |      |      |      |      |      |      |      |
| 23 |      |      |      |      |      |      |      |      |      |
| 24 |      |      |      |      |      |      |      |      |      |
| 25 |      |      |      |      |      |      |      |      |      |
| 26 |      |      |      |      |      |      |      |      |      |
| 27 |      |      |      |      |      |      |      |      |      |
| 28 |      |      |      |      |      |      |      |      |      |
| 29 |      |      |      |      |      |      |      |      |      |
| 30 |      |      |      |      |      |      |      |      |      |
| 31 |      |      |      |      |      |      |      |      |      |
| 32 |      |      |      |      |      |      |      |      |      |
| 33 |      |      |      |      |      |      |      |      |      |
| 34 |      |      |      |      |      |      |      |      |      |
| 35 |      |      |      |      |      |      |      |      |      |
| 36 |      |      |      |      |      |      |      |      |      |
| 37 |      |      |      |      |      |      |      |      |      |
| 38 |      |      |      |      |      |      |      |      |      |
| 39 |      |      |      |      |      |      |      |      |      |
| 40 |      |      |      |      |      |      |      |      |      |
| 41 |      |      |      |      |      |      |      |      |      |
| 42 |      |      |      |      |      |      |      |      |      |
| 43 |      |      |      |      |      |      |      |      |      |
| 44 |      |      |      |      |      |      |      |      |      |
| 45 |      |      |      |      |      |      |      |      |      |
| 46 |      |      |      |      |      |      |      |      |      |
| 47 |      |      |      |      |      |      |      |      |      |
| 48 |      |      |      |      |      |      |      |      |      |
| 49 |      |      |      |      |      |      |      |      |      |
| 50 |      |      |      |      |      |      |      |      |      |
| 51 |      |      |      |      |      |      |      |      |      |
| 52 |      |      |      |      |      |      |      |      |      |
| 53 |      |      |      |      |      |      |      |      |      |
| 54 |      |      |      |      |      |      |      |      |      |
| 55 |      |      |      |      |      |      |      |      |      |
| 56 |      |      |      |      |      |      |      |      |      |
| 57 |      |      |      |      |      |      |      |      |      |
| 58 |      |      |      |      |      |      |      |      |      |
| 59 |      |      |      |      |      |      |      |      |      |
| 60 |      |      |      |      |      |      |      |      |      |

For peer review only

1  
2  
3  
4  
5  
6  
7  
8  
9  
10  
11  
12  
13  
14  
15  
16  
17  
18  
19  
20  
21  
22  
23  
24  
25  
26  
27  
28  
29  
30  
31  
32  
33  
34  
35  
36  
37  
38  
39  
40  
41  
42  
43  
44  
45  
46  
47  
48  
49  
50  
51  
52  
53  
54  
55  
56  
57  
58  
59  
60

| <b>RTP</b> | <b>RWJ</b> | <b>RC9</b> | <b>RGP</b> | <b>RD8</b> | <b>RBD</b> | <b>RNQ</b> | <b>RP5</b> | <b>RVJ</b> |
|------------|------------|------------|------------|------------|------------|------------|------------|------------|
| 0.74       | 0.75       | 0.75       | 0.73       | 0.65       | 0.75       | 0.77       | 0.72       | 0.79       |
| 0.56       | 0.52       | 0.62       | 0.60       | 0.47       | 0.56       | 0.54       | 0.54       | 0.56       |
| 0.45       | 0.47       | 0.57       | 0.54       | 0.44       | 0.52       | 0.52       | 0.51       | 0.49       |
| 0.66       | 0.64       | 0.62       | 0.67       | 0.68       | 0.69       | 0.61       | 0.50       | 0.50       |
| 0.73       | 0.80       | 0.82       | 0.73       | 0.73       | 0.80       | 0.85       | 0.78       | 0.74       |
| 0.72       | 0.69       | 0.75       | 0.68       | 0.68       | 0.70       | 0.72       | 0.64       | 0.70       |
| 0.50       | 0.55       | 0.56       | 0.52       | 0.47       | 0.51       | 0.53       | 0.54       | 0.54       |
| 0.82       | 0.83       | 0.87       | 0.81       | 0.81       | 0.85       | 0.86       | 0.85       | 0.87       |
| 0.83       | 0.77       | 0.76       | 0.76       | 0.80       | 0.78       | 0.79       | 0.77       | 0.77       |
| 0.84       | 0.81       | 0.85       | 0.77       | 0.78       | 0.81       | 0.83       | 0.80       | 0.84       |
| 0.67       | 0.74       | 0.76       | 0.76       | 0.72       | 0.76       | 0.75       | 0.74       | 0.74       |
| 0.92       | 0.86       | 0.92       | 0.85       | 0.86       | 0.84       | 0.81       | 0.81       | 0.82       |
| 0.76       | 0.81       | 0.83       | 0.79       | 0.70       | 0.84       | 0.78       | 0.76       | 0.79       |
| 0.66       | 0.63       | 0.68       | 0.66       | 0.63       | 0.66       | 0.67       | 0.61       | 0.64       |
| 0.88       | 0.81       | 0.88       | 0.88       | 0.87       | 0.86       | 0.87       | 0.87       | 0.94       |
| 0.94       | 0.88       | 0.88       | 0.88       | 0.85       | 0.90       | 0.92       | 0.85       | 0.88       |
| 0.79       | 0.75       | 0.80       | 0.76       | 0.72       | 0.80       | 0.74       | 0.72       | 0.83       |
| 0.71       | 0.77       | 0.71       | 0.59       | 0.53       | 0.71       | 0.68       | 0.58       | 0.68       |
| 0.69       | 0.74       | 0.74       | 0.77       | 0.68       | 0.81       | 0.72       | 0.75       | 0.75       |
| 0.77       | 0.76       | 0.72       | 0.73       | 0.63       | 0.71       | 0.74       | 0.71       | 0.75       |
| 0.58       | 0.62       | 0.60       | 0.65       | 0.54       | 0.68       | 0.61       | 0.59       | 0.60       |
| 0.70       | 0.72       | 0.71       | 0.74       | 0.65       | 0.73       | 0.68       | 0.71       | 0.73       |
| 0.96       | 0.96       | 0.96       | 0.96       | 0.90       | 0.97       | 0.97       | 0.97       | 0.96       |
| 0.85       | 0.83       | 0.86       | 0.83       | 0.84       | 0.84       | 0.86       | 0.81       | 0.86       |
| 0.87       | 0.92       | 0.87       | 0.86       | 0.87       | 0.91       | 0.84       | 0.87       | 0.84       |
| 0.30       | 0.31       | 0.45       | 0.34       | 0.31       | 0.31       | 0.30       | 0.32       | 0.40       |
| 0.60       | 0.60       | 0.62       | 0.65       | 0.55       | 0.62       | 0.56       | 0.53       | 0.65       |
| 0.81       | 0.84       | 0.83       | 0.86       | 0.83       | 0.85       | 0.87       | 0.85       | 0.83       |
| 0.88       | 0.86       | 0.92       | 0.81       | 0.81       | 0.85       | 0.88       | 0.74       | 0.82       |
| 0.79       | 0.77       | 0.85       | 0.77       | 0.80       | 0.81       | 0.77       | 0.79       | 0.87       |
| 0.89       | 0.87       | 0.86       | 0.80       | 0.82       | 0.83       | 0.86       | 0.84       | 0.91       |
| 0.83       | 0.87       | 0.84       | 0.83       | 0.83       | 0.84       | 0.82       | 0.83       | 0.83       |
| 0.95       | 0.96       | 0.96       | 0.93       | 0.92       | 0.98       | 0.94       | 0.92       | 0.92       |
| 0.86       | 0.80       | 0.78       | 0.75       | 0.77       | 0.82       | 0.78       | 0.83       | 0.87       |
| 0.84       | 0.89       | 0.86       | 0.91       | 0.86       | 0.92       | 0.84       | 0.83       | 0.90       |
| 0.88       | 0.82       | 0.86       | 0.82       | 0.69       | 0.77       | 0.80       | 0.77       | 0.73       |
| 0.35       | 0.51       | 0.52       | 0.45       | 0.30       | 0.48       | 0.42       | 0.35       | 0.40       |
| 0.94       | 0.93       | 0.93       | 0.94       | 0.91       | 0.98       | 0.91       | 0.92       | 0.92       |
| 0.70       | 0.64       | 0.66       | 0.58       | 0.53       | 0.67       | 0.62       | 0.57       | 0.68       |
| 0.49       | 0.55       | 0.70       | 0.53       | 0.39       | 0.62       | 0.47       | 0.54       | 0.57       |
| 0.86       | 0.90       | 0.92       | 0.93       | 0.87       | 0.89       | 0.83       | 0.83       | 0.85       |
| 0.82       | 0.84       | 0.87       | 0.93       | 0.81       | 0.91       | 0.80       | 0.81       | 0.83       |

|    |      |      |      |      |      |      |      |      |      |
|----|------|------|------|------|------|------|------|------|------|
| 1  |      |      |      |      |      |      |      |      |      |
| 2  | 0.48 | 0.38 | 0.69 | 0.62 | 0.47 | 0.62 | 0.40 | 0.47 | 0.54 |
| 3  | 0.87 | 0.66 | 0.78 | 0.71 | 0.73 | 0.76 | 0.73 | 0.76 | 0.72 |
| 4  | 0.97 | 0.95 | 0.96 | 0.94 | 0.95 | 0.93 | 0.93 | 0.92 | 0.96 |
| 5  | 0.96 | 0.95 | 0.93 | 0.95 | 0.96 | 0.97 | 0.90 | 0.94 | 0.94 |
| 6  | 0.91 | 0.92 | 0.97 | 0.88 | 0.83 | 0.91 | 0.89 | 0.89 | 0.94 |
| 7  | 0.90 | 0.79 | 0.86 | 0.85 | 0.77 | 0.89 | 0.72 | 0.86 | 0.90 |
| 8  | 0.59 | 0.65 | 0.59 | 0.67 | 0.66 | 0.73 | 0.74 | 0.78 | 0.71 |
| 9  | 0.69 | 0.74 | 0.63 | 0.77 | 0.69 | 0.77 | 0.61 | 0.69 | 0.76 |
| 10 | 0.69 | 0.74 | 0.63 | 0.77 | 0.69 | 0.77 | 0.61 | 0.69 | 0.76 |
| 11 | 0.22 | 0.16 | 0.22 | 0.12 | 0.30 | 0.22 | 0.17 | 0.19 | 0.27 |
| 12 |      |      |      |      |      |      |      |      |      |
| 13 |      |      |      |      |      |      |      |      |      |
| 14 |      |      |      |      |      |      |      |      |      |
| 15 |      |      |      |      |      |      |      |      |      |
| 16 |      |      |      |      |      |      |      |      |      |
| 17 |      |      |      |      |      |      |      |      |      |
| 18 |      |      |      |      |      |      |      |      |      |
| 19 |      |      |      |      |      |      |      |      |      |
| 20 |      |      |      |      |      |      |      |      |      |
| 21 |      |      |      |      |      |      |      |      |      |
| 22 |      |      |      |      |      |      |      |      |      |
| 23 |      |      |      |      |      |      |      |      |      |
| 24 |      |      |      |      |      |      |      |      |      |
| 25 |      |      |      |      |      |      |      |      |      |
| 26 |      |      |      |      |      |      |      |      |      |
| 27 |      |      |      |      |      |      |      |      |      |
| 28 |      |      |      |      |      |      |      |      |      |
| 29 |      |      |      |      |      |      |      |      |      |
| 30 |      |      |      |      |      |      |      |      |      |
| 31 |      |      |      |      |      |      |      |      |      |
| 32 |      |      |      |      |      |      |      |      |      |
| 33 |      |      |      |      |      |      |      |      |      |
| 34 |      |      |      |      |      |      |      |      |      |
| 35 |      |      |      |      |      |      |      |      |      |
| 36 |      |      |      |      |      |      |      |      |      |
| 37 |      |      |      |      |      |      |      |      |      |
| 38 |      |      |      |      |      |      |      |      |      |
| 39 |      |      |      |      |      |      |      |      |      |
| 40 |      |      |      |      |      |      |      |      |      |
| 41 |      |      |      |      |      |      |      |      |      |
| 42 |      |      |      |      |      |      |      |      |      |
| 43 |      |      |      |      |      |      |      |      |      |
| 44 |      |      |      |      |      |      |      |      |      |
| 45 |      |      |      |      |      |      |      |      |      |
| 46 |      |      |      |      |      |      |      |      |      |
| 47 |      |      |      |      |      |      |      |      |      |
| 48 |      |      |      |      |      |      |      |      |      |
| 49 |      |      |      |      |      |      |      |      |      |
| 50 |      |      |      |      |      |      |      |      |      |
| 51 |      |      |      |      |      |      |      |      |      |
| 52 |      |      |      |      |      |      |      |      |      |
| 53 |      |      |      |      |      |      |      |      |      |
| 54 |      |      |      |      |      |      |      |      |      |
| 55 |      |      |      |      |      |      |      |      |      |
| 56 |      |      |      |      |      |      |      |      |      |
| 57 |      |      |      |      |      |      |      |      |      |
| 58 |      |      |      |      |      |      |      |      |      |
| 59 |      |      |      |      |      |      |      |      |      |
| 60 |      |      |      |      |      |      |      |      |      |

For peer review only



1  
2  
3  
4  
5  
6  
7  
8  
9  
10  
11  
12  
13  
14  
15  
16  
17  
18  
19  
20  
21  
22  
23  
24  
25  
26  
27  
28  
29  
30  
31  
32  
33  
34  
35  
36  
37  
38  
39  
40  
41  
42  
43  
44  
45  
46  
47  
48  
49  
50  
51  
52  
53  
54  
55  
56  
57  
58  
59  
60

| <b>RW3</b> | <b>RJC</b> | <b>RAE</b> | <b>RBL</b> | <b>RGR</b> | <b>RQ6</b> | <b>R1K</b> | <b>RN7</b> | <b>RHW</b> |
|------------|------------|------------|------------|------------|------------|------------|------------|------------|
| 0.68       | 0.78       | 0.70       | 0.75       | 0.74       | 0.71       | 0.73       | 0.76       | 0.75       |
| 0.60       | 0.59       | 0.54       | 0.60       | 0.57       | 0.63       | 0.58       | 0.62       | 0.58       |
| 0.51       | 0.56       | 0.39       | 0.56       | 0.55       | 0.58       | 0.51       | 0.47       | 0.46       |
| 0.74       | 0.54       | 0.57       | 0.44       | 0.57       | 0.67       | 0.68       | 0.67       | 0.49       |
| 0.75       | 0.84       | 0.75       | 0.80       | 0.84       | 0.86       | 0.75       | 0.80       | 0.81       |
| 0.74       | 0.77       | 0.69       | 0.74       | 0.72       | 0.76       | 0.68       | 0.80       | 0.78       |
| 0.59       | 0.54       | 0.49       | 0.57       | 0.53       | 0.59       | 0.54       | 0.60       | 0.56       |
| 0.86       | 0.85       | 0.82       | 0.84       | 0.83       | 0.86       | 0.86       | 0.86       | 0.81       |
| 0.68       | 0.80       | 0.78       | 0.80       | 0.83       | 0.70       | 0.70       | 0.76       | 0.82       |
| 0.84       | 0.84       | 0.82       | 0.83       | 0.86       | 0.86       | 0.78       | 0.87       | 0.82       |
| 0.77       | 0.82       | 0.65       | 0.74       | 0.75       | 0.78       | 0.71       | 0.75       | 0.71       |
| 0.88       | 0.83       | 0.89       | 0.84       | 0.86       | 0.85       | 0.86       | 0.92       | 0.84       |
| 0.81       | 0.83       | 0.74       | 0.83       | 0.81       | 0.85       | 0.76       | 0.81       | 0.75       |
| 0.67       | 0.67       | 0.60       | 0.66       | 0.65       | 0.69       | 0.64       | 0.75       | 0.64       |
| 0.87       | 0.87       | 0.78       | 0.86       | 0.87       | 0.88       | 0.86       | 0.80       | 0.88       |
| 0.84       | 0.93       | 0.83       | 0.90       | 0.92       | 0.89       | 0.88       | 0.89       | 0.92       |
| 0.81       | 0.81       | 0.71       | 0.77       | 0.80       | 0.80       | 0.70       | 0.85       | 0.78       |
| 0.76       | 0.71       | 0.61       | 0.59       | 0.68       | 0.73       | 0.64       | 0.75       | 0.61       |
| 0.68       | 0.78       | 0.69       | 0.77       | 0.79       | 0.79       | 0.76       | 0.71       | 0.74       |
| 0.73       | 0.76       | 0.69       | 0.74       | 0.76       | 0.72       | 0.72       | 0.80       | 0.75       |
| 0.59       | 0.76       | 0.54       | 0.62       | 0.70       | 0.63       | 0.59       | 0.63       | 0.64       |
| 0.71       | 0.74       | 0.59       | 0.68       | 0.68       | 0.72       | 0.69       | 0.75       | 0.66       |
| 0.98       | 0.96       | 0.94       | 0.97       | 0.94       | 0.97       | 0.94       | 0.96       | 0.97       |
| 0.82       | 0.86       | 0.78       | 0.88       | 0.90       | 0.92       | 0.85       | 0.86       | 0.81       |
| 0.88       | 0.89       | 0.89       | 0.86       | 0.85       | 0.87       | 0.85       | 0.87       | 0.86       |
| 0.36       | 0.37       | 0.33       | 0.31       | 0.35       | 0.36       | 0.39       | 0.40       | 0.29       |
| 0.58       | 0.66       | 0.57       | 0.66       | 0.70       | 0.68       | 0.60       | 0.67       | 0.54       |
| 0.84       | 0.93       | 0.78       | 0.82       | 0.90       | 0.90       | 0.84       | 0.85       | 0.89       |
| 0.89       | 0.88       | 0.81       | 0.80       | 0.84       | 0.86       | 0.79       | 0.90       | 0.86       |
| 0.82       | 0.88       | 0.76       | 0.84       | 0.81       | 0.85       | 0.81       | 0.87       | 0.82       |
| 0.80       | 0.83       | 0.81       | 0.87       | 0.90       | 0.91       | 0.80       | 0.88       | 0.90       |
| 0.84       | 0.85       | 0.85       | 0.85       | 0.85       | 0.83       | 0.80       | 0.81       | 0.82       |
| 0.94       | 0.97       | 0.92       | 0.94       | 0.94       | 0.95       | 0.90       | 0.95       | 0.89       |
| 0.76       | 0.85       | 0.75       | 0.86       | 0.87       | 0.85       | 0.75       | 0.83       | 0.84       |
| 0.90       | 0.94       | 0.83       | 0.90       | 0.90       | 0.90       | 0.86       | 0.89       | 0.88       |
| 0.82       | 0.86       | 0.80       | 0.72       | 0.77       | 0.81       | 0.81       | 0.89       | 0.78       |
| 0.52       | 0.51       | 0.45       | 0.52       | 0.36       | 0.52       | 0.45       | 0.48       | 0.45       |
| 0.91       | 0.92       | 0.93       | 0.93       | 0.94       | 0.96       | 0.93       | 0.95       | 0.96       |
| 0.60       | 0.70       | 0.59       | 0.73       | 0.73       | 0.76       | 0.70       | 0.65       | 0.71       |
| 0.53       | 0.62       | 0.50       | 0.58       | 0.41       | 0.62       | 0.53       | 0.62       | 0.58       |
| 0.89       | 0.94       | 0.86       | 0.90       | 0.92       | 0.95       | 0.87       | 0.92       | 0.85       |
| 0.87       | 0.96       | 0.86       | 0.89       | 0.87       | 0.88       | 0.86       | 0.88       | 0.84       |

|    |      |      |      |      |      |      |      |      |      |
|----|------|------|------|------|------|------|------|------|------|
| 1  |      |      |      |      |      |      |      |      |      |
| 2  | 0.65 | 0.72 | 0.52 | 0.48 | 0.55 | 0.52 | 0.52 | 0.60 | 0.49 |
| 3  | 0.77 | 0.71 | 0.81 | 0.85 | 0.68 | 0.72 | 0.71 | 0.77 | 0.76 |
| 4  | 0.94 | 0.96 | 0.94 | 0.95 | 0.96 | 0.98 | 0.96 | 0.95 | 0.94 |
| 5  | 0.96 | 0.97 | 0.94 | 0.95 | 0.98 | 0.97 | 0.96 | 0.92 | 0.95 |
| 6  | 0.93 | 0.88 | 0.83 | 0.90 | 0.86 | 0.91 | 0.89 | 0.91 | 0.95 |
| 7  | 0.82 | 0.91 | 0.81 | 0.85 | 0.81 | 0.85 | 0.79 | 0.85 | 0.82 |
| 8  | 0.69 | 0.76 | 0.68 | 0.71 | 0.67 | 0.74 | 0.53 | 0.62 | 0.63 |
| 9  | 0.70 | 0.88 | 0.63 | 0.77 | 0.64 | 0.72 | 0.62 | 0.75 | 0.67 |
| 10 | 0.70 | 0.88 | 0.63 | 0.77 | 0.64 | 0.72 | 0.62 | 0.75 | 0.67 |
| 11 | 0.32 | 0.24 | 0.27 | 0.21 | 0.26 | 0.37 | 0.26 | 0.25 | 0.16 |
| 12 |      |      |      |      |      |      |      |      |      |
| 13 |      |      |      |      |      |      |      |      |      |
| 14 |      |      |      |      |      |      |      |      |      |
| 15 |      |      |      |      |      |      |      |      |      |
| 16 |      |      |      |      |      |      |      |      |      |
| 17 |      |      |      |      |      |      |      |      |      |
| 18 |      |      |      |      |      |      |      |      |      |
| 19 |      |      |      |      |      |      |      |      |      |
| 20 |      |      |      |      |      |      |      |      |      |
| 21 |      |      |      |      |      |      |      |      |      |
| 22 |      |      |      |      |      |      |      |      |      |
| 23 |      |      |      |      |      |      |      |      |      |
| 24 |      |      |      |      |      |      |      |      |      |
| 25 |      |      |      |      |      |      |      |      |      |
| 26 |      |      |      |      |      |      |      |      |      |
| 27 |      |      |      |      |      |      |      |      |      |
| 28 |      |      |      |      |      |      |      |      |      |
| 29 |      |      |      |      |      |      |      |      |      |
| 30 |      |      |      |      |      |      |      |      |      |
| 31 |      |      |      |      |      |      |      |      |      |
| 32 |      |      |      |      |      |      |      |      |      |
| 33 |      |      |      |      |      |      |      |      |      |
| 34 |      |      |      |      |      |      |      |      |      |
| 35 |      |      |      |      |      |      |      |      |      |
| 36 |      |      |      |      |      |      |      |      |      |
| 37 |      |      |      |      |      |      |      |      |      |
| 38 |      |      |      |      |      |      |      |      |      |
| 39 |      |      |      |      |      |      |      |      |      |
| 40 |      |      |      |      |      |      |      |      |      |
| 41 |      |      |      |      |      |      |      |      |      |
| 42 |      |      |      |      |      |      |      |      |      |
| 43 |      |      |      |      |      |      |      |      |      |
| 44 |      |      |      |      |      |      |      |      |      |
| 45 |      |      |      |      |      |      |      |      |      |
| 46 |      |      |      |      |      |      |      |      |      |
| 47 |      |      |      |      |      |      |      |      |      |
| 48 |      |      |      |      |      |      |      |      |      |
| 49 |      |      |      |      |      |      |      |      |      |
| 50 |      |      |      |      |      |      |      |      |      |
| 51 |      |      |      |      |      |      |      |      |      |
| 52 |      |      |      |      |      |      |      |      |      |
| 53 |      |      |      |      |      |      |      |      |      |
| 54 |      |      |      |      |      |      |      |      |      |
| 55 |      |      |      |      |      |      |      |      |      |
| 56 |      |      |      |      |      |      |      |      |      |
| 57 |      |      |      |      |      |      |      |      |      |
| 58 |      |      |      |      |      |      |      |      |      |
| 59 |      |      |      |      |      |      |      |      |      |
| 60 |      |      |      |      |      |      |      |      |      |

For peer review only

1  
2  
3  
4  
5  
6  
7  
8  
9  
10  
11  
12  
13  
14  
15  
16  
17  
18  
19  
20  
21  
22  
23  
24  
25  
26  
27  
28  
29  
30  
31  
32  
33  
34  
35  
36  
37  
38  
39  
40  
41  
42  
43  
44  
45  
46  
47  
48  
49  
50  
51  
52  
53  
54  
55  
56  
57  
58  
59  
60

| <b>RNL</b> | <b>RCX</b> | <b>RPA</b> | <b>RWH</b> | <b>RM2</b> | <b>RR7</b> | <b>RNS</b> | <b>RN3</b> | <b>RGN</b> |
|------------|------------|------------|------------|------------|------------|------------|------------|------------|
| 0.72       | 0.77       | 0.73       | 0.72       | 0.80       | 0.75       | 0.70       | 0.75       | 0.77       |
| 0.53       | 0.59       | 0.52       | 0.55       | 0.60       | 0.60       | 0.60       | 0.56       | 0.58       |
| 0.53       | 0.50       | 0.44       | 0.50       | 0.54       | 0.65       | 0.52       | 0.47       | 0.59       |
| 0.54       | 0.76       | 0.66       | 0.47       | 0.62       | 0.62       | 0.52       | 0.49       | 0.66       |
| 0.74       | 0.83       | 0.75       | 0.77       | 0.86       | 0.84       | 0.74       | 0.80       | 0.83       |
| 0.69       | 0.73       | 0.74       | 0.70       | 0.77       | 0.81       | 0.77       | 0.75       | 0.76       |
| 0.52       | 0.58       | 0.57       | 0.52       | 0.63       | 0.61       | 0.50       | 0.51       | 0.61       |
| 0.85       | 0.89       | 0.83       | 0.81       | 0.86       | 0.89       | 0.83       | 0.86       | 0.86       |
| 0.81       | 0.77       | 0.76       | 0.75       | 0.81       | 0.85       | 0.74       | 0.79       | 0.80       |
| 0.75       | 0.83       | 0.82       | 0.80       | 0.88       | 0.89       | 0.84       | 0.82       | 0.84       |
| 0.72       | 0.78       | 0.71       | 0.73       | 0.77       | 0.79       | 0.67       | 0.68       | 0.73       |
| 0.79       | 0.87       | 0.84       | 0.82       | 0.85       | 0.90       | 0.81       | 0.82       | 0.88       |
| 0.76       | 0.80       | 0.79       | 0.75       | 0.84       | 0.85       | 0.77       | 0.81       | 0.81       |
| 0.60       | 0.68       | 0.62       | 0.63       | 0.69       | 0.79       | 0.69       | 0.66       | 0.69       |
| 0.84       | 0.82       | 0.83       | 0.84       | 0.85       | 0.90       | 0.83       | 0.87       | 0.92       |
| 0.89       | 0.85       | 0.80       | 0.89       | 0.88       | 0.93       | 0.86       | 0.88       | 0.90       |
| 0.74       | 0.81       | 0.75       | 0.75       | 0.81       | 0.84       | 0.79       | 0.80       | 0.81       |
| 0.61       | 0.70       | 0.69       | 0.58       | 0.67       | 0.74       | 0.66       | 0.61       | 0.68       |
| 0.83       | 0.73       | 0.69       | 0.74       | 0.71       | 0.84       | 0.72       | 0.70       | 0.80       |
| 0.69       | 0.77       | 0.77       | 0.69       | 0.72       | 0.75       | 0.77       | 0.80       | 0.78       |
| 0.67       | 0.71       | 0.57       | 0.61       | 0.61       | 0.60       | 0.60       | 0.64       | 0.67       |
| 0.67       | 0.73       | 0.66       | 0.65       | 0.73       | 0.80       | 0.73       | 0.69       | 0.69       |
| 0.94       | 0.94       | 0.97       | 0.96       | 0.98       | 0.98       | 0.92       | 0.97       | 0.97       |
| 0.80       | 0.83       | 0.81       | 0.87       | 0.90       | 0.90       | 0.83       | 0.84       | 0.84       |
| 0.86       | 0.89       | 0.85       | 0.83       | 0.90       | 0.93       | 0.84       | 0.86       | 0.89       |
| 0.34       | 0.35       | 0.27       | 0.28       | 0.32       | 0.46       | 0.29       | 0.31       | 0.44       |
| 0.55       | 0.68       | 0.58       | 0.55       | 0.63       | 0.69       | 0.58       | 0.59       | 0.66       |
| 0.89       | 0.83       | 0.83       | 0.80       | 0.87       | 0.88       | 0.85       | 0.79       | 0.83       |
| 0.76       | 0.85       | 0.84       | 0.81       | 0.86       | 0.89       | 0.85       | 0.84       | 0.84       |
| 0.76       | 0.83       | 0.80       | 0.82       | 0.80       | 0.87       | 0.81       | 0.80       | 0.83       |
| 0.83       | 0.86       | 0.84       | 0.79       | 0.85       | 0.91       | 0.79       | 0.85       | 0.90       |
| 0.85       | 0.85       | 0.82       | 0.81       | 0.89       | 0.92       | 0.82       | 0.80       | 0.85       |
| 0.94       | 0.94       | 0.91       | 0.91       | 0.95       | 0.98       | 0.92       | 0.94       | 0.96       |
| 0.88       | 0.82       | 0.78       | 0.80       | 0.85       | 0.86       | 0.76       | 0.84       | 0.80       |
| 0.87       | 0.90       | 0.86       | 0.87       | 0.88       | 0.92       | 0.89       | 0.90       | 0.92       |
| 0.79       | 0.85       | 0.88       | 0.84       | 0.72       | 0.84       | 0.85       | 0.75       | 0.93       |
| 0.41       | 0.42       | 0.43       | 0.44       | 0.45       | 0.56       | 0.45       | 0.36       | 0.52       |
| 0.93       | 0.93       | 0.92       | 0.91       | 0.93       | 0.97       | 0.94       | 0.95       | 0.96       |
| 0.65       | 0.68       | 0.61       | 0.69       | 0.62       | 0.79       | 0.65       | 0.51       | 0.69       |
| 0.48       | 0.49       | 0.53       | 0.47       | 0.47       | 0.64       | 0.57       | 0.47       | 0.57       |
| 0.79       | 0.88       | 0.90       | 0.86       | 0.89       | 0.93       | 0.87       | 0.88       | 0.92       |
| 0.84       | 0.90       | 0.86       | 0.84       | 0.89       | 0.92       | 0.86       | 0.82       | 0.87       |

|    |      |      |      |      |      |      |      |      |      |
|----|------|------|------|------|------|------|------|------|------|
| 1  |      |      |      |      |      |      |      |      |      |
| 2  | 0.50 | 0.56 | 0.65 | 0.59 | 0.56 | 0.64 | 0.66 | 0.63 | 0.67 |
| 3  | 0.76 | 0.76 | 0.69 | 0.69 | 0.76 | 0.83 | 0.80 | 0.76 | 0.75 |
| 4  | 0.96 | 0.93 | 0.96 | 0.96 | 0.93 | 0.97 | 0.94 | 0.97 | 0.98 |
| 5  | 0.91 | 0.96 | 0.96 | 0.94 | 0.97 | 0.96 | 0.93 | 0.96 | 0.96 |
| 6  | 0.85 | 0.87 | 0.90 | 0.87 | 0.92 | 0.95 | 0.93 | 0.90 | 0.91 |
| 7  | 0.77 | 0.84 | 0.82 | 0.88 | 0.86 | 0.84 | 0.81 | 0.88 | 0.88 |
| 8  | 0.79 | 0.73 | 0.51 | 0.59 | 0.62 | 0.71 | 0.68 | 0.73 | 0.74 |
| 9  | 0.70 | 0.73 | 0.65 | 0.49 | 0.67 | 0.78 | 0.68 | 0.60 | 0.67 |
| 10 | 0.70 | 0.73 | 0.65 | 0.49 | 0.67 | 0.78 | 0.68 | 0.60 | 0.67 |
| 11 | 0.16 | 0.26 | 0.22 | 0.23 | 0.34 | 0.19 | 0.23 | 0.34 | 0.23 |
| 12 |      |      |      |      |      |      |      |      |      |
| 13 |      |      |      |      |      |      |      |      |      |
| 14 |      |      |      |      |      |      |      |      |      |
| 15 |      |      |      |      |      |      |      |      |      |
| 16 |      |      |      |      |      |      |      |      |      |
| 17 |      |      |      |      |      |      |      |      |      |
| 18 |      |      |      |      |      |      |      |      |      |
| 19 |      |      |      |      |      |      |      |      |      |
| 20 |      |      |      |      |      |      |      |      |      |
| 21 |      |      |      |      |      |      |      |      |      |
| 22 |      |      |      |      |      |      |      |      |      |
| 23 |      |      |      |      |      |      |      |      |      |
| 24 |      |      |      |      |      |      |      |      |      |
| 25 |      |      |      |      |      |      |      |      |      |
| 26 |      |      |      |      |      |      |      |      |      |
| 27 |      |      |      |      |      |      |      |      |      |
| 28 |      |      |      |      |      |      |      |      |      |
| 29 |      |      |      |      |      |      |      |      |      |
| 30 |      |      |      |      |      |      |      |      |      |
| 31 |      |      |      |      |      |      |      |      |      |
| 32 |      |      |      |      |      |      |      |      |      |
| 33 |      |      |      |      |      |      |      |      |      |
| 34 |      |      |      |      |      |      |      |      |      |
| 35 |      |      |      |      |      |      |      |      |      |
| 36 |      |      |      |      |      |      |      |      |      |
| 37 |      |      |      |      |      |      |      |      |      |
| 38 |      |      |      |      |      |      |      |      |      |
| 39 |      |      |      |      |      |      |      |      |      |
| 40 |      |      |      |      |      |      |      |      |      |
| 41 |      |      |      |      |      |      |      |      |      |
| 42 |      |      |      |      |      |      |      |      |      |
| 43 |      |      |      |      |      |      |      |      |      |
| 44 |      |      |      |      |      |      |      |      |      |
| 45 |      |      |      |      |      |      |      |      |      |
| 46 |      |      |      |      |      |      |      |      |      |
| 47 |      |      |      |      |      |      |      |      |      |
| 48 |      |      |      |      |      |      |      |      |      |
| 49 |      |      |      |      |      |      |      |      |      |
| 50 |      |      |      |      |      |      |      |      |      |
| 51 |      |      |      |      |      |      |      |      |      |
| 52 |      |      |      |      |      |      |      |      |      |
| 53 |      |      |      |      |      |      |      |      |      |
| 54 |      |      |      |      |      |      |      |      |      |
| 55 |      |      |      |      |      |      |      |      |      |
| 56 |      |      |      |      |      |      |      |      |      |
| 57 |      |      |      |      |      |      |      |      |      |
| 58 |      |      |      |      |      |      |      |      |      |
| 59 |      |      |      |      |      |      |      |      |      |
| 60 |      |      |      |      |      |      |      |      |      |

For peer review only

1  
2  
3  
4  
5  
6  
7  
8  
9  
10  
11  
12  
13  
14  
15  
16  
17  
18  
19  
20  
21  
22  
23  
24  
25  
26  
27  
28  
29  
30  
31  
32  
33  
34  
35  
36  
37  
38  
39  
40  
41  
42  
43  
44  
45  
46  
47  
48  
49  
50  
51  
52  
53  
54  
55  
56  
57  
58  
59  
60

| <b>RVW</b> | <b>RNZ</b> | <b>RDE</b> | <b>RLN</b> | <b>RWY</b> | <b>RGQ</b> | <b>RXP</b> | <b>RXH</b> | <b>RXK</b> |
|------------|------------|------------|------------|------------|------------|------------|------------|------------|
| 0.77       | 0.76       | 0.76       | 0.73       | 0.74       | 0.69       | 0.73       | 0.77       | 0.75       |
| 0.65       | 0.63       | 0.62       | 0.61       | 0.57       | 0.62       | 0.59       | 0.60       | 0.57       |
| 0.55       | 0.58       | 0.53       | 0.58       | 0.49       | 0.55       | 0.55       | 0.55       | 0.47       |
| 0.72       | 0.61       | 0.69       | 0.59       | 0.59       | 0.65       | 0.64       | 0.69       | 0.59       |
| 0.82       | 0.82       | 0.80       | 0.80       | 0.75       | 0.78       | 0.78       | 0.79       | 0.75       |
| 0.80       | 0.72       | 0.78       | 0.76       | 0.75       | 0.69       | 0.71       | 0.71       | 0.74       |
| 0.63       | 0.54       | 0.62       | 0.58       | 0.51       | 0.52       | 0.54       | 0.53       | 0.55       |
| 0.88       | 0.83       | 0.86       | 0.85       | 0.84       | 0.82       | 0.82       | 0.85       | 0.90       |
| 0.77       | 0.79       | 0.79       | 0.72       | 0.79       | 0.78       | 0.79       | 0.80       | 0.75       |
| 0.88       | 0.86       | 0.83       | 0.83       | 0.83       | 0.83       | 0.81       | 0.82       | 0.85       |
| 0.80       | 0.80       | 0.72       | 0.76       | 0.72       | 0.77       | 0.71       | 0.73       | 0.67       |
| 0.91       | 0.87       | 0.91       | 0.82       | 0.90       | 0.91       | 0.77       | 0.93       | 0.90       |
| 0.83       | 0.84       | 0.80       | 0.78       | 0.78       | 0.83       | 0.80       | 0.80       | 0.80       |
| 0.74       | 0.68       | 0.72       | 0.74       | 0.66       | 0.67       | 0.65       | 0.63       | 0.66       |
| 0.87       | 0.87       | 0.89       | 0.83       | 0.84       | 0.88       | 0.85       | 0.86       | 0.86       |
| 0.87       | 0.89       | 0.89       | 0.89       | 0.89       | 0.90       | 0.87       | 0.88       | 0.84       |
| 0.85       | 0.81       | 0.81       | 0.78       | 0.77       | 0.78       | 0.74       | 0.78       | 0.77       |
| 0.73       | 0.76       | 0.70       | 0.77       | 0.68       | 0.69       | 0.69       | 0.74       | 0.71       |
| 0.76       | 0.78       | 0.72       | 0.77       | 0.75       | 0.74       | 0.72       | 0.75       | 0.70       |
| 0.76       | 0.74       | 0.80       | 0.71       | 0.75       | 0.70       | 0.71       | 0.73       | 0.79       |
| 0.59       | 0.67       | 0.57       | 0.63       | 0.64       | 0.65       | 0.65       | 0.67       | 0.55       |
| 0.80       | 0.78       | 0.76       | 0.75       | 0.73       | 0.78       | 0.74       | 0.69       | 0.70       |
| 0.97       | 0.97       | 0.96       | 0.94       | 0.96       | 0.97       | 0.95       | 0.97       | 0.96       |
| 0.84       | 0.89       | 0.81       | 0.88       | 0.82       | 0.86       | 0.77       | 0.86       | 0.81       |
| 0.91       | 0.93       | 0.87       | 0.90       | 0.89       | 0.87       | 0.88       | 0.82       | 0.88       |
| 0.37       | 0.36       | 0.37       | 0.39       | 0.38       | 0.36       | 0.33       | 0.35       | 0.39       |
| 0.71       | 0.65       | 0.64       | 0.68       | 0.64       | 0.64       | 0.61       | 0.63       | 0.58       |
| 0.84       | 0.81       | 0.82       | 0.81       | 0.87       | 0.85       | 0.85       | 0.85       | 0.76       |
| 0.90       | 0.88       | 0.86       | 0.85       | 0.83       | 0.80       | 0.84       | 0.89       | 0.86       |
| 0.87       | 0.80       | 0.83       | 0.79       | 0.77       | 0.85       | 0.78       | 0.79       | 0.84       |
| 0.85       | 0.89       | 0.90       | 0.86       | 0.86       | 0.87       | 0.85       | 0.86       | 0.83       |
| 0.88       | 0.87       | 0.82       | 0.85       | 0.84       | 0.84       | 0.84       | 0.81       | 0.84       |
| 0.95       | 0.96       | 0.94       | 0.93       | 0.95       | 0.96       | 0.94       | 0.93       | 0.94       |
| 0.86       | 0.88       | 0.83       | 0.79       | 0.87       | 0.89       | 0.77       | 0.80       | 0.77       |
| 0.92       | 0.92       | 0.92       | 0.89       | 0.85       | 0.91       | 0.88       | 0.89       | 0.87       |
| 0.82       | 0.86       | 0.81       | 0.79       | 0.84       | 0.85       | 0.79       | 0.82       | 0.86       |
| 0.50       | 0.50       | 0.49       | 0.53       | 0.51       | 0.56       | 0.49       | 0.53       | 0.39       |
| 0.93       | 0.97       | 0.95       | 0.92       | 0.96       | 0.95       | 0.94       | 0.94       | 0.93       |
| 0.67       | 0.70       | 0.64       | 0.70       | 0.66       | 0.65       | 0.57       | 0.74       | 0.66       |
| 0.59       | 0.57       | 0.49       | 0.56       | 0.56       | 0.58       | 0.58       | 0.49       | 0.49       |
| 0.93       | 0.92       | 0.90       | 0.92       | 0.93       | 0.90       | 0.90       | 0.88       | 0.91       |
| 0.94       | 0.88       | 0.88       | 0.89       | 0.85       | 0.82       | 0.90       | 0.82       | 0.88       |

|    |      |      |      |      |      |      |      |      |      |
|----|------|------|------|------|------|------|------|------|------|
| 1  |      |      |      |      |      |      |      |      |      |
| 2  | 0.63 | 0.63 | 0.57 | 0.56 | 0.48 | 0.65 | 0.53 | 0.52 | 0.62 |
| 3  | 0.87 | 0.71 | 0.77 | 0.79 | 0.74 | 0.72 | 0.72 | 0.88 | 0.87 |
| 4  | 0.96 | 0.95 | 0.97 | 0.97 | 0.96 | 0.97 | 0.97 | 0.96 | 0.94 |
| 5  | 0.98 | 0.97 | 0.95 | 0.97 | 0.96 | 0.97 | 0.96 | 0.95 | 0.93 |
| 6  | 0.91 | 0.88 | 0.94 | 0.91 | 0.86 | 0.93 | 0.91 | 0.84 | 0.92 |
| 7  | 0.84 | 0.82 | 0.89 | 0.80 | 0.75 | 0.88 | 0.77 | 0.85 | 0.79 |
| 8  | 0.67 | 0.72 | 0.60 | 0.70 | 0.65 | 0.73 | 0.74 | 0.73 | 0.69 |
| 9  | 0.81 | 0.79 | 0.72 | 0.78 | 0.74 | 0.71 | 0.76 | 0.65 | 0.61 |
| 10 | 0.81 | 0.79 | 0.72 | 0.78 | 0.74 | 0.71 | 0.76 | 0.65 | 0.61 |
| 11 | 0.22 | 0.23 | 0.34 | 0.24 | 0.33 | 0.23 | 0.21 | 0.26 | 0.33 |
| 12 |      |      |      |      |      |      |      |      |      |
| 13 |      |      |      |      |      |      |      |      |      |
| 14 |      |      |      |      |      |      |      |      |      |
| 15 |      |      |      |      |      |      |      |      |      |
| 16 |      |      |      |      |      |      |      |      |      |
| 17 |      |      |      |      |      |      |      |      |      |
| 18 |      |      |      |      |      |      |      |      |      |
| 19 |      |      |      |      |      |      |      |      |      |
| 20 |      |      |      |      |      |      |      |      |      |
| 21 |      |      |      |      |      |      |      |      |      |
| 22 |      |      |      |      |      |      |      |      |      |
| 23 |      |      |      |      |      |      |      |      |      |
| 24 |      |      |      |      |      |      |      |      |      |
| 25 |      |      |      |      |      |      |      |      |      |
| 26 |      |      |      |      |      |      |      |      |      |
| 27 |      |      |      |      |      |      |      |      |      |
| 28 |      |      |      |      |      |      |      |      |      |
| 29 |      |      |      |      |      |      |      |      |      |
| 30 |      |      |      |      |      |      |      |      |      |
| 31 |      |      |      |      |      |      |      |      |      |
| 32 |      |      |      |      |      |      |      |      |      |
| 33 |      |      |      |      |      |      |      |      |      |
| 34 |      |      |      |      |      |      |      |      |      |
| 35 |      |      |      |      |      |      |      |      |      |
| 36 |      |      |      |      |      |      |      |      |      |
| 37 |      |      |      |      |      |      |      |      |      |
| 38 |      |      |      |      |      |      |      |      |      |
| 39 |      |      |      |      |      |      |      |      |      |
| 40 |      |      |      |      |      |      |      |      |      |
| 41 |      |      |      |      |      |      |      |      |      |
| 42 |      |      |      |      |      |      |      |      |      |
| 43 |      |      |      |      |      |      |      |      |      |
| 44 |      |      |      |      |      |      |      |      |      |
| 45 |      |      |      |      |      |      |      |      |      |
| 46 |      |      |      |      |      |      |      |      |      |
| 47 |      |      |      |      |      |      |      |      |      |
| 48 |      |      |      |      |      |      |      |      |      |
| 49 |      |      |      |      |      |      |      |      |      |
| 50 |      |      |      |      |      |      |      |      |      |
| 51 |      |      |      |      |      |      |      |      |      |
| 52 |      |      |      |      |      |      |      |      |      |
| 53 |      |      |      |      |      |      |      |      |      |
| 54 |      |      |      |      |      |      |      |      |      |
| 55 |      |      |      |      |      |      |      |      |      |
| 56 |      |      |      |      |      |      |      |      |      |
| 57 |      |      |      |      |      |      |      |      |      |
| 58 |      |      |      |      |      |      |      |      |      |
| 59 |      |      |      |      |      |      |      |      |      |
| 60 |      |      |      |      |      |      |      |      |      |

For peer review only

1  
2  
3  
4  
5  
6  
7  
8  
9  
10  
11  
12  
13  
14  
15  
16  
17  
18  
19  
20  
21  
22  
23  
24  
25  
26  
27  
28  
29  
30  
31  
32  
33  
34  
35  
36  
37  
38  
39  
40  
41  
42  
43  
44  
45  
46  
47  
48  
49  
50  
51  
52  
53  
54  
55  
56  
57  
58  
59  
60

|  | <b>RD1</b> | <b>RJL</b> | <b>RXF</b> | <b>RQ8</b> | <b>RXQ</b> | <b>RTF</b> | <b>RD3</b> | <b>RW6</b> | <b>RNA</b> |
|--|------------|------------|------------|------------|------------|------------|------------|------------|------------|
|  | 0.70       | 0.72       | 0.74       | 0.72       | 0.77       | 0.75       | 0.70       | 0.69       | 0.74       |
|  | 0.59       | 0.53       | 0.56       | 0.63       | 0.55       | 0.65       | 0.62       | 0.51       | 0.59       |
|  | 0.48       | 0.52       | 0.55       | 0.54       | 0.51       | 0.49       | 0.55       | 0.53       | 0.52       |
|  | 0.64       | 0.63       | 0.63       | 0.72       | 0.69       | 0.57       | 0.60       | 0.52       | 0.60       |
|  | 0.78       | 0.82       | 0.77       | 0.84       | 0.77       | 0.79       | 0.81       | 0.73       | 0.80       |
|  | 0.75       | 0.72       | 0.78       | 0.75       | 0.72       | 0.81       | 0.70       | 0.69       | 0.76       |
|  | 0.55       | 0.52       | 0.55       | 0.53       | 0.55       | 0.62       | 0.51       | 0.54       | 0.55       |
|  | 0.84       | 0.80       | 0.82       | 0.83       | 0.85       | 0.88       | 0.85       | 0.85       | 0.86       |
|  | 0.77       | 0.76       | 0.77       | 0.81       | 0.76       | 0.81       | 0.78       | 0.74       | 0.75       |
|  | 0.84       | 0.81       | 0.83       | 0.84       | 0.83       | 0.87       | 0.82       | 0.82       | 0.84       |
|  | 0.74       | 0.72       | 0.75       | 0.72       | 0.71       | 0.77       | 0.77       | 0.73       | 0.73       |
|  | 0.89       | 0.91       | 0.88       | 0.89       | 0.83       | 0.91       | 0.85       | 0.90       | 0.91       |
|  | 0.81       | 0.77       | 0.81       | 0.79       | 0.82       | 0.84       | 0.78       | 0.78       | 0.80       |
|  | 0.65       | 0.69       | 0.72       | 0.70       | 0.63       | 0.77       | 0.70       | 0.63       | 0.66       |
|  | 0.88       | 0.87       | 0.89       | 0.86       | 0.84       | 0.87       | 0.89       | 0.84       | 0.84       |
|  | 0.90       | 0.90       | 0.87       | 0.91       | 0.90       | 0.88       | 0.90       | 0.86       | 0.88       |
|  | 0.81       | 0.76       | 0.78       | 0.79       | 0.78       | 0.81       | 0.78       | 0.74       | 0.77       |
|  | 0.71       | 0.69       | 0.73       | 0.75       | 0.69       | 0.79       | 0.65       | 0.67       | 0.67       |
|  | 0.75       | 0.80       | 0.71       | 0.73       | 0.80       | 0.78       | 0.76       | 0.69       | 0.77       |
|  | 0.77       | 0.68       | 0.74       | 0.76       | 0.73       | 0.74       | 0.70       | 0.73       | 0.74       |
|  | 0.67       | 0.58       | 0.58       | 0.58       | 0.65       | 0.66       | 0.66       | 0.57       | 0.56       |
|  | 0.71       | 0.68       | 0.76       | 0.74       | 0.70       | 0.81       | 0.73       | 0.65       | 0.67       |
|  | 0.95       | 0.95       | 0.94       | 0.98       | 0.94       | 0.93       | 0.96       | 0.95       | 0.98       |
|  | 0.85       | 0.86       | 0.83       | 0.85       | 0.84       | 0.87       | 0.88       | 0.82       | 0.84       |
|  | 0.90       | 0.85       | 0.88       | 0.87       | 0.87       | 0.91       | 0.91       | 0.88       | 0.84       |
|  | 0.34       | 0.35       | 0.38       | 0.33       | 0.30       | 0.38       | 0.36       | 0.35       | 0.35       |
|  | 0.63       | 0.62       | 0.64       | 0.62       | 0.61       | 0.67       | 0.65       | 0.57       | 0.62       |
|  | 0.83       | 0.88       | 0.83       | 0.89       | 0.84       | 0.84       | 0.87       | 0.80       | 0.85       |
|  | 0.82       | 0.85       | 0.87       | 0.87       | 0.86       | 0.89       | 0.82       | 0.84       | 0.87       |
|  | 0.80       | 0.81       | 0.80       | 0.84       | 0.81       | 0.83       | 0.81       | 0.78       | 0.82       |
|  | 0.84       | 0.81       | 0.81       | 0.88       | 0.86       | 0.83       | 0.88       | 0.76       | 0.89       |
|  | 0.87       | 0.84       | 0.86       | 0.85       | 0.87       | 0.86       | 0.84       | 0.86       | 0.85       |
|  | 0.95       | 0.94       | 0.95       | 0.93       | 0.95       | 0.97       | 0.96       | 0.91       | 0.94       |
|  | 0.84       | 0.80       | 0.83       | 0.80       | 0.86       | 0.88       | 0.89       | 0.80       | 0.83       |
|  | 0.92       | 0.89       | 0.89       | 0.90       | 0.87       | 0.92       | 0.93       | 0.83       | 0.89       |
|  | 0.85       | 0.74       | 0.83       | 0.79       | 0.78       | 0.82       | 0.76       | 0.78       | 0.78       |
|  | 0.40       | 0.42       | 0.43       | 0.47       | 0.33       | 0.57       | 0.52       | 0.40       | 0.39       |
|  | 0.92       | 0.95       | 0.94       | 0.93       | 0.94       | 0.90       | 0.95       | 0.90       | 0.94       |
|  | 0.61       | 0.66       | 0.56       | 0.72       | 0.74       | 0.68       | 0.71       | 0.63       | 0.59       |
|  | 0.46       | 0.50       | 0.52       | 0.53       | 0.44       | 0.63       | 0.65       | 0.48       | 0.45       |
|  | 0.93       | 0.84       | 0.91       | 0.89       | 0.91       | 0.91       | 0.92       | 0.86       | 0.88       |
|  | 0.90       | 0.90       | 0.90       | 0.86       | 0.80       | 0.91       | 0.91       | 0.82       | 0.84       |

|    |      |      |      |      |      |      |      |      |      |
|----|------|------|------|------|------|------|------|------|------|
| 1  |      |      |      |      |      |      |      |      |      |
| 2  | 0.59 | 0.51 | 0.55 | 0.62 | 0.60 | 0.65 | 0.58 | 0.57 | 0.59 |
| 3  | 0.74 | 0.67 | 0.78 | 0.72 | 0.75 | 0.73 | 0.74 | 0.73 | 0.82 |
| 4  | 0.97 | 0.94 | 0.95 | 0.97 | 0.95 | 0.98 | 0.95 | 0.94 | 0.94 |
| 5  | 0.97 | 0.95 | 0.97 | 0.97 | 0.96 | 0.97 | 0.97 | 0.94 | 0.93 |
| 6  | 0.90 | 0.88 | 0.84 | 0.91 | 0.90 | 0.92 | 0.94 | 0.88 | 0.86 |
| 7  | 0.85 | 0.78 | 0.82 | 0.81 | 0.87 | 0.82 | 0.84 | 0.80 | 0.87 |
| 8  | 0.74 | 0.68 | 0.70 | 0.66 | 0.66 | 0.69 | 0.73 | 0.70 | 0.53 |
| 9  | 0.67 | 0.68 | 0.72 | 0.67 | 0.74 | 0.84 | 0.79 | 0.63 | 0.46 |
| 10 | 0.67 | 0.68 | 0.72 | 0.67 | 0.74 | 0.84 | 0.79 | 0.63 | 0.46 |
| 11 | 0.28 | 0.22 | 0.31 | 0.20 | 0.27 | 0.19 | 0.23 | 0.18 | 0.23 |
| 12 |      |      |      |      |      |      |      |      |      |
| 13 |      |      |      |      |      |      |      |      |      |
| 14 |      |      |      |      |      |      |      |      |      |
| 15 |      |      |      |      |      |      |      |      |      |
| 16 |      |      |      |      |      |      |      |      |      |
| 17 |      |      |      |      |      |      |      |      |      |
| 18 |      |      |      |      |      |      |      |      |      |
| 19 |      |      |      |      |      |      |      |      |      |
| 20 |      |      |      |      |      |      |      |      |      |
| 21 |      |      |      |      |      |      |      |      |      |
| 22 |      |      |      |      |      |      |      |      |      |
| 23 |      |      |      |      |      |      |      |      |      |
| 24 |      |      |      |      |      |      |      |      |      |
| 25 |      |      |      |      |      |      |      |      |      |
| 26 |      |      |      |      |      |      |      |      |      |
| 27 |      |      |      |      |      |      |      |      |      |
| 28 |      |      |      |      |      |      |      |      |      |
| 29 |      |      |      |      |      |      |      |      |      |
| 30 |      |      |      |      |      |      |      |      |      |
| 31 |      |      |      |      |      |      |      |      |      |
| 32 |      |      |      |      |      |      |      |      |      |
| 33 |      |      |      |      |      |      |      |      |      |
| 34 |      |      |      |      |      |      |      |      |      |
| 35 |      |      |      |      |      |      |      |      |      |
| 36 |      |      |      |      |      |      |      |      |      |
| 37 |      |      |      |      |      |      |      |      |      |
| 38 |      |      |      |      |      |      |      |      |      |
| 39 |      |      |      |      |      |      |      |      |      |
| 40 |      |      |      |      |      |      |      |      |      |
| 41 |      |      |      |      |      |      |      |      |      |
| 42 |      |      |      |      |      |      |      |      |      |
| 43 |      |      |      |      |      |      |      |      |      |
| 44 |      |      |      |      |      |      |      |      |      |
| 45 |      |      |      |      |      |      |      |      |      |
| 46 |      |      |      |      |      |      |      |      |      |
| 47 |      |      |      |      |      |      |      |      |      |
| 48 |      |      |      |      |      |      |      |      |      |
| 49 |      |      |      |      |      |      |      |      |      |
| 50 |      |      |      |      |      |      |      |      |      |
| 51 |      |      |      |      |      |      |      |      |      |
| 52 |      |      |      |      |      |      |      |      |      |
| 53 |      |      |      |      |      |      |      |      |      |
| 54 |      |      |      |      |      |      |      |      |      |
| 55 |      |      |      |      |      |      |      |      |      |
| 56 |      |      |      |      |      |      |      |      |      |
| 57 |      |      |      |      |      |      |      |      |      |
| 58 |      |      |      |      |      |      |      |      |      |
| 59 |      |      |      |      |      |      |      |      |      |
| 60 |      |      |      |      |      |      |      |      |      |

For peer review only



1  
2  
3  
4  
5  
6  
7  
8  
9  
10  
11  
12  
13  
14  
15  
16  
17  
18  
19  
20  
21  
22  
23  
24  
25  
26  
27  
28  
29  
30  
31  
32  
33  
34  
35  
36  
37  
38  
39  
40  
41  
42  
43  
44  
45  
46  
47  
48  
49  
50  
51  
52  
53  
54  
55  
56  
57  
58  
59  
60

| <b>RA9</b> | <b>RA2</b> | <b>RTX</b> | <b>RXC</b> | <b>RXL</b> | <b>RBA</b> | <b>RAJ</b> | <b>RRK</b> | <b>RHU</b> |
|------------|------------|------------|------------|------------|------------|------------|------------|------------|
| 0.80       | 0.74       | 0.74       | 0.73       | 0.76       | 0.76       | 0.75       | 0.70       | 0.73       |
| 0.66       | 0.58       | 0.62       | 0.55       | 0.56       | 0.62       | 0.61       | 0.57       | 0.60       |
| 0.61       | 0.49       | 0.54       | 0.52       | 0.52       | 0.58       | 0.56       | 0.51       | 0.48       |
| 0.65       | 0.66       | 0.66       | 0.62       | 0.54       | 0.67       | 0.59       | 0.63       | 0.55       |
| 0.81       | 0.80       | 0.84       | 0.82       | 0.81       | 0.82       | 0.78       | 0.78       | 0.83       |
| 0.77       | 0.73       | 0.76       | 0.71       | 0.73       | 0.77       | 0.72       | 0.73       | 0.74       |
| 0.63       | 0.55       | 0.57       | 0.51       | 0.52       | 0.58       | 0.57       | 0.60       | 0.58       |
| 0.88       | 0.87       | 0.86       | 0.84       | 0.84       | 0.85       | 0.86       | 0.85       | 0.87       |
| 0.78       | 0.77       | 0.78       | 0.76       | 0.77       | 0.77       | 0.83       | 0.72       | 0.76       |
| 0.85       | 0.83       | 0.86       | 0.82       | 0.82       | 0.84       | 0.84       | 0.84       | 0.84       |
| 0.82       | 0.71       | 0.77       | 0.77       | 0.74       | 0.82       | 0.72       | 0.73       | 0.73       |
| 0.87       | 0.87       | 0.88       | 0.79       | 0.83       | 0.88       | 0.85       | 0.90       | 0.86       |
| 0.84       | 0.77       | 0.82       | 0.77       | 0.78       | 0.84       | 0.80       | 0.80       | 0.81       |
| 0.73       | 0.65       | 0.71       | 0.65       | 0.67       | 0.72       | 0.69       | 0.63       | 0.67       |
| 0.86       | 0.81       | 0.84       | 0.83       | 0.89       | 0.91       | 0.85       | 0.85       | 0.84       |
| 0.88       | 0.88       | 0.89       | 0.88       | 0.89       | 0.94       | 0.86       | 0.88       | 0.89       |
| 0.86       | 0.79       | 0.81       | 0.78       | 0.78       | 0.81       | 0.75       | 0.79       | 0.80       |
| 0.70       | 0.63       | 0.77       | 0.68       | 0.68       | 0.72       | 0.62       | 0.61       | 0.61       |
| 0.78       | 0.71       | 0.79       | 0.73       | 0.74       | 0.81       | 0.73       | 0.71       | 0.75       |
| 0.80       | 0.76       | 0.74       | 0.73       | 0.73       | 0.81       | 0.76       | 0.75       | 0.72       |
| 0.63       | 0.59       | 0.71       | 0.66       | 0.59       | 0.70       | 0.60       | 0.65       | 0.61       |
| 0.78       | 0.71       | 0.79       | 0.69       | 0.74       | 0.78       | 0.75       | 0.67       | 0.67       |
| 0.95       | 0.96       | 0.96       | 0.98       | 0.96       | 0.96       | 0.95       | 0.95       | 0.95       |
| 0.87       | 0.86       | 0.85       | 0.86       | 0.86       | 0.89       | 0.83       | 0.84       | 0.88       |
| 0.90       | 0.84       | 0.88       | 0.86       | 0.88       | 0.90       | 0.89       | 0.86       | 0.85       |
| 0.34       | 0.30       | 0.40       | 0.28       | 0.41       | 0.40       | 0.29       | 0.36       | 0.30       |
| 0.67       | 0.62       | 0.68       | 0.61       | 0.62       | 0.70       | 0.64       | 0.59       | 0.62       |
| 0.87       | 0.82       | 0.88       | 0.85       | 0.85       | 0.90       | 0.87       | 0.81       | 0.85       |
| 0.90       | 0.84       | 0.88       | 0.87       | 0.86       | 0.89       | 0.83       | 0.84       | 0.83       |
| 0.89       | 0.81       | 0.81       | 0.79       | 0.80       | 0.85       | 0.84       | 0.76       | 0.84       |
| 0.90       | 0.88       | 0.88       | 0.85       | 0.86       | 0.88       | 0.90       | 0.88       | 0.85       |
| 0.85       | 0.79       | 0.83       | 0.81       | 0.85       | 0.87       | 0.85       | 0.81       | 0.82       |
| 0.96       | 0.95       | 0.95       | 0.95       | 0.91       | 0.96       | 0.96       | 0.94       | 0.93       |
| 0.88       | 0.84       | 0.88       | 0.81       | 0.82       | 0.85       | 0.84       | 0.82       | 0.80       |
| 0.89       | 0.92       | 0.91       | 0.84       | 0.90       | 0.91       | 0.91       | 0.86       | 0.89       |
| 0.81       | 0.80       | 0.83       | 0.76       | 0.86       | 0.89       | 0.81       | 0.75       | 0.79       |
| 0.40       | 0.48       | 0.52       | 0.41       | 0.53       | 0.44       | 0.47       | 0.42       | 0.44       |
| 0.96       | 0.94       | 0.91       | 0.95       | 0.93       | 0.95       | 0.97       | 0.95       | 0.95       |
| 0.75       | 0.69       | 0.74       | 0.70       | 0.73       | 0.81       | 0.66       | 0.59       | 0.64       |
| 0.52       | 0.56       | 0.59       | 0.47       | 0.60       | 0.51       | 0.63       | 0.50       | 0.49       |
| 0.93       | 0.88       | 0.90       | 0.88       | 0.91       | 0.93       | 0.91       | 0.91       | 0.90       |
| 0.87       | 0.87       | 0.88       | 0.83       | 0.84       | 0.90       | 0.87       | 0.88       | 0.82       |

|    |      |      |      |      |      |      |      |      |      |
|----|------|------|------|------|------|------|------|------|------|
| 1  |      |      |      |      |      |      |      |      |      |
| 2  | 0.75 | 0.38 | 0.65 | 0.51 | 0.61 | 0.60 | 0.57 | 0.57 | 0.51 |
| 3  | 0.81 | 0.75 | 0.81 | 0.71 | 0.76 | 0.77 | 0.74 | 0.80 | 0.80 |
| 4  | 0.94 | 0.95 | 0.97 | 0.97 | 0.96 | 0.98 | 0.98 | 0.94 | 0.94 |
| 5  | 0.97 | 0.94 | 0.95 | 0.96 | 0.98 | 0.98 | 0.93 | 0.96 | 0.96 |
| 6  | 0.92 | 0.90 | 0.90 | 0.93 | 0.95 | 0.92 | 0.89 | 0.90 | 0.91 |
| 7  | 0.92 | 0.82 | 0.85 | 0.75 | 0.83 | 0.88 | 0.92 | 0.76 | 0.89 |
| 8  | 0.68 | 0.67 | 0.73 | 0.78 | 0.53 | 0.73 | 0.55 | 0.64 | 0.63 |
| 9  | 0.77 | 0.65 | 0.74 | 0.67 | 0.71 | 0.86 | 0.70 | 0.64 | 0.66 |
| 10 | 0.77 | 0.65 | 0.74 | 0.67 | 0.71 | 0.86 | 0.70 | 0.64 | 0.66 |
| 11 | 0.20 | 0.25 | 0.30 | 0.22 | 0.21 | 0.26 | 0.24 | 0.39 | 0.24 |
| 12 |      |      |      |      |      |      |      |      |      |
| 13 |      |      |      |      |      |      |      |      |      |
| 14 |      |      |      |      |      |      |      |      |      |
| 15 |      |      |      |      |      |      |      |      |      |
| 16 |      |      |      |      |      |      |      |      |      |
| 17 |      |      |      |      |      |      |      |      |      |
| 18 |      |      |      |      |      |      |      |      |      |
| 19 |      |      |      |      |      |      |      |      |      |
| 20 |      |      |      |      |      |      |      |      |      |
| 21 |      |      |      |      |      |      |      |      |      |
| 22 |      |      |      |      |      |      |      |      |      |
| 23 |      |      |      |      |      |      |      |      |      |
| 24 |      |      |      |      |      |      |      |      |      |
| 25 |      |      |      |      |      |      |      |      |      |
| 26 |      |      |      |      |      |      |      |      |      |
| 27 |      |      |      |      |      |      |      |      |      |
| 28 |      |      |      |      |      |      |      |      |      |
| 29 |      |      |      |      |      |      |      |      |      |
| 30 |      |      |      |      |      |      |      |      |      |
| 31 |      |      |      |      |      |      |      |      |      |
| 32 |      |      |      |      |      |      |      |      |      |
| 33 |      |      |      |      |      |      |      |      |      |
| 34 |      |      |      |      |      |      |      |      |      |
| 35 |      |      |      |      |      |      |      |      |      |
| 36 |      |      |      |      |      |      |      |      |      |
| 37 |      |      |      |      |      |      |      |      |      |
| 38 |      |      |      |      |      |      |      |      |      |
| 39 |      |      |      |      |      |      |      |      |      |
| 40 |      |      |      |      |      |      |      |      |      |
| 41 |      |      |      |      |      |      |      |      |      |
| 42 |      |      |      |      |      |      |      |      |      |
| 43 |      |      |      |      |      |      |      |      |      |
| 44 |      |      |      |      |      |      |      |      |      |
| 45 |      |      |      |      |      |      |      |      |      |
| 46 |      |      |      |      |      |      |      |      |      |
| 47 |      |      |      |      |      |      |      |      |      |
| 48 |      |      |      |      |      |      |      |      |      |
| 49 |      |      |      |      |      |      |      |      |      |
| 50 |      |      |      |      |      |      |      |      |      |
| 51 |      |      |      |      |      |      |      |      |      |
| 52 |      |      |      |      |      |      |      |      |      |
| 53 |      |      |      |      |      |      |      |      |      |
| 54 |      |      |      |      |      |      |      |      |      |
| 55 |      |      |      |      |      |      |      |      |      |
| 56 |      |      |      |      |      |      |      |      |      |
| 57 |      |      |      |      |      |      |      |      |      |
| 58 |      |      |      |      |      |      |      |      |      |
| 59 |      |      |      |      |      |      |      |      |      |
| 60 |      |      |      |      |      |      |      |      |      |

For peer review only

1  
2  
3  
4  
5  
6  
7  
8  
9  
10  
11  
12  
13  
14  
15  
16  
17  
18  
19  
20  
21  
22  
23  
24  
25  
26  
27  
28  
29  
30  
31  
32  
33  
34  
35  
36  
37  
38  
39  
40  
41  
42  
43  
44  
45  
46  
47  
48  
49  
50  
51  
52  
53  
54  
55  
56  
57  
58  
59  
60

| <b>RXR</b> | <b>RJ7</b> | <b>RR1</b> | <b>RYR</b> | <b>RXN</b> | <b>RYJ</b> | <b>RX1</b> | <b>RWD</b> | <b>RL4</b> |
|------------|------------|------------|------------|------------|------------|------------|------------|------------|
| 0.75       | 0.71       | 0.76       | 0.71       | 0.77       | 0.70       | 0.74       | 0.74       | 0.72       |
| 0.53       | 0.56       | 0.55       | 0.56       | 0.60       | 0.55       | 0.54       | 0.48       | 0.57       |
| 0.50       | 0.54       | 0.47       | 0.61       | 0.51       | 0.50       | 0.49       | 0.51       | 0.49       |
| 0.60       | 0.60       | 0.61       | 0.58       | 0.61       | 0.61       | 0.57       | 0.57       | 0.53       |
| 0.77       | 0.79       | 0.78       | 0.83       | 0.77       | 0.74       | 0.78       | 0.76       | 0.81       |
| 0.67       | 0.71       | 0.72       | 0.71       | 0.73       | 0.68       | 0.74       | 0.69       | 0.74       |
| 0.49       | 0.53       | 0.56       | 0.53       | 0.57       | 0.49       | 0.56       | 0.51       | 0.54       |
| 0.85       | 0.84       | 0.87       | 0.87       | 0.87       | 0.82       | 0.85       | 0.83       | 0.86       |
| 0.77       | 0.75       | 0.78       | 0.77       | 0.81       | 0.71       | 0.78       | 0.80       | 0.74       |
| 0.81       | 0.82       | 0.83       | 0.81       | 0.84       | 0.80       | 0.85       | 0.80       | 0.84       |
| 0.69       | 0.75       | 0.71       | 0.77       | 0.74       | 0.70       | 0.71       | 0.67       | 0.71       |
| 0.84       | 0.83       | 0.88       | 0.84       | 0.87       | 0.81       | 0.88       | 0.88       | 0.83       |
| 0.77       | 0.76       | 0.79       | 0.81       | 0.84       | 0.72       | 0.78       | 0.76       | 0.80       |
| 0.62       | 0.62       | 0.64       | 0.66       | 0.69       | 0.61       | 0.64       | 0.61       | 0.64       |
| 0.85       | 0.84       | 0.84       | 0.84       | 0.82       | 0.81       | 0.86       | 0.84       | 0.84       |
| 0.87       | 0.84       | 0.87       | 0.92       | 0.86       | 0.85       | 0.88       | 0.87       | 0.88       |
| 0.76       | 0.75       | 0.76       | 0.77       | 0.79       | 0.71       | 0.78       | 0.74       | 0.76       |
| 0.64       | 0.67       | 0.69       | 0.65       | 0.64       | 0.70       | 0.61       | 0.60       | 0.65       |
| 0.70       | 0.69       | 0.72       | 0.74       | 0.73       | 0.66       | 0.71       | 0.71       | 0.69       |
| 0.68       | 0.73       | 0.76       | 0.76       | 0.80       | 0.66       | 0.77       | 0.71       | 0.76       |
| 0.63       | 0.59       | 0.58       | 0.61       | 0.65       | 0.51       | 0.59       | 0.59       | 0.57       |
| 0.68       | 0.67       | 0.67       | 0.71       | 0.74       | 0.65       | 0.70       | 0.62       | 0.68       |
| 0.96       | 0.95       | 0.96       | 0.95       | 0.96       | 0.93       | 0.97       | 0.96       | 0.97       |
| 0.80       | 0.86       | 0.83       | 0.87       | 0.85       | 0.80       | 0.82       | 0.79       | 0.81       |
| 0.87       | 0.91       | 0.85       | 0.88       | 0.89       | 0.85       | 0.89       | 0.88       | 0.85       |
| 0.41       | 0.29       | 0.32       | 0.25       | 0.35       | 0.31       | 0.37       | 0.30       | 0.30       |
| 0.60       | 0.55       | 0.59       | 0.64       | 0.66       | 0.51       | 0.59       | 0.55       | 0.61       |
| 0.78       | 0.83       | 0.80       | 0.85       | 0.81       | 0.76       | 0.89       | 0.80       | 0.79       |
| 0.80       | 0.82       | 0.88       | 0.83       | 0.84       | 0.78       | 0.85       | 0.76       | 0.83       |
| 0.76       | 0.79       | 0.80       | 0.83       | 0.83       | 0.79       | 0.85       | 0.77       | 0.83       |
| 0.80       | 0.82       | 0.86       | 0.88       | 0.88       | 0.80       | 0.87       | 0.83       | 0.83       |
| 0.82       | 0.82       | 0.84       | 0.84       | 0.87       | 0.77       | 0.84       | 0.84       | 0.79       |
| 0.94       | 0.94       | 0.93       | 0.94       | 0.95       | 0.92       | 0.94       | 0.93       | 0.95       |
| 0.80       | 0.81       | 0.81       | 0.86       | 0.81       | 0.76       | 0.82       | 0.80       | 0.77       |
| 0.86       | 0.84       | 0.87       | 0.86       | 0.88       | 0.83       | 0.87       | 0.87       | 0.89       |
| 0.81       | 0.84       | 0.79       | 0.85       | 0.84       | 0.79       | 0.79       | 0.80       | 0.87       |
| 0.54       | 0.35       | 0.42       | 0.39       | 0.52       | 0.35       | 0.41       | 0.37       | 0.41       |
| 0.91       | 0.93       | 0.90       | 0.94       | 0.94       | 0.89       | 0.94       | 0.93       | 0.93       |
| 0.59       | 0.68       | 0.66       | 0.72       | 0.65       | 0.64       | 0.64       | 0.60       | 0.56       |
| 0.67       | 0.41       | 0.55       | 0.43       | 0.62       | 0.39       | 0.48       | 0.42       | 0.47       |
| 0.91       | 0.84       | 0.88       | 0.89       | 0.90       | 0.82       | 0.89       | 0.82       | 0.91       |
| 0.87       | 0.83       | 0.86       | 0.82       | 0.88       | 0.80       | 0.86       | 0.87       | 0.86       |

|    |      |      |      |      |      |      |      |      |      |
|----|------|------|------|------|------|------|------|------|------|
| 1  |      |      |      |      |      |      |      |      |      |
| 2  | 0.53 | 0.51 | 0.56 | 0.53 | 0.56 | 0.56 | 0.51 | 0.50 | 0.59 |
| 3  | 0.85 | 0.73 | 0.89 | 0.77 | 0.86 | 0.68 | 0.80 | 0.77 | 0.85 |
| 4  | 0.94 | 0.93 | 0.96 | 0.96 | 0.94 | 0.90 | 0.95 | 0.94 | 0.96 |
| 5  | 0.95 | 0.95 | 0.95 | 0.95 | 0.96 | 0.93 | 0.96 | 0.92 | 0.94 |
| 6  | 0.93 | 0.89 | 0.89 | 0.90 | 0.92 | 0.94 | 0.93 | 0.86 | 0.89 |
| 7  | 0.80 | 0.81 | 0.82 | 0.83 | 0.87 | 0.85 | 0.90 | 0.78 | 0.82 |
| 8  | 0.67 | 0.55 | 0.62 | 0.77 | 0.69 | 0.59 | 0.73 | 0.65 | 0.59 |
| 9  | 0.69 | 0.55 | 0.66 | 0.69 | 0.73 | 0.60 | 0.63 | 0.67 | 0.58 |
| 10 | 0.69 | 0.55 | 0.66 | 0.69 | 0.73 | 0.60 | 0.63 | 0.67 | 0.58 |
| 11 | 0.20 | 0.31 | 0.19 | 0.29 | 0.16 | 0.50 | 0.35 | 0.30 | 0.22 |
| 12 |      |      |      |      |      |      |      |      |      |
| 13 |      |      |      |      |      |      |      |      |      |
| 14 |      |      |      |      |      |      |      |      |      |
| 15 |      |      |      |      |      |      |      |      |      |
| 16 |      |      |      |      |      |      |      |      |      |
| 17 |      |      |      |      |      |      |      |      |      |
| 18 |      |      |      |      |      |      |      |      |      |
| 19 |      |      |      |      |      |      |      |      |      |
| 20 |      |      |      |      |      |      |      |      |      |
| 21 |      |      |      |      |      |      |      |      |      |
| 22 |      |      |      |      |      |      |      |      |      |
| 23 |      |      |      |      |      |      |      |      |      |
| 24 |      |      |      |      |      |      |      |      |      |
| 25 |      |      |      |      |      |      |      |      |      |
| 26 |      |      |      |      |      |      |      |      |      |
| 27 |      |      |      |      |      |      |      |      |      |
| 28 |      |      |      |      |      |      |      |      |      |
| 29 |      |      |      |      |      |      |      |      |      |
| 30 |      |      |      |      |      |      |      |      |      |
| 31 |      |      |      |      |      |      |      |      |      |
| 32 |      |      |      |      |      |      |      |      |      |
| 33 |      |      |      |      |      |      |      |      |      |
| 34 |      |      |      |      |      |      |      |      |      |
| 35 |      |      |      |      |      |      |      |      |      |
| 36 |      |      |      |      |      |      |      |      |      |
| 37 |      |      |      |      |      |      |      |      |      |
| 38 |      |      |      |      |      |      |      |      |      |
| 39 |      |      |      |      |      |      |      |      |      |
| 40 |      |      |      |      |      |      |      |      |      |
| 41 |      |      |      |      |      |      |      |      |      |
| 42 |      |      |      |      |      |      |      |      |      |
| 43 |      |      |      |      |      |      |      |      |      |
| 44 |      |      |      |      |      |      |      |      |      |
| 45 |      |      |      |      |      |      |      |      |      |
| 46 |      |      |      |      |      |      |      |      |      |
| 47 |      |      |      |      |      |      |      |      |      |
| 48 |      |      |      |      |      |      |      |      |      |
| 49 |      |      |      |      |      |      |      |      |      |
| 50 |      |      |      |      |      |      |      |      |      |
| 51 |      |      |      |      |      |      |      |      |      |
| 52 |      |      |      |      |      |      |      |      |      |
| 53 |      |      |      |      |      |      |      |      |      |
| 54 |      |      |      |      |      |      |      |      |      |
| 55 |      |      |      |      |      |      |      |      |      |
| 56 |      |      |      |      |      |      |      |      |      |
| 57 |      |      |      |      |      |      |      |      |      |
| 58 |      |      |      |      |      |      |      |      |      |
| 59 |      |      |      |      |      |      |      |      |      |
| 60 |      |      |      |      |      |      |      |      |      |

For peer review only

1  
2  
3  
4  
5  
6  
7  
8  
9  
10  
11  
12  
13  
14  
15  
16  
17  
18  
19  
20  
21  
22  
23  
24  
25  
26  
27  
28  
29  
30  
31  
32  
33  
34  
35  
36  
37  
38  
39  
40  
41  
42  
43  
44  
45  
46  
47  
48  
49  
50  
51  
52  
53  
54  
55  
56  
57  
58  
59  
60

| <b>RN5</b> | <b>RDU</b> | <b>RBV</b> | <b>RA7</b> | <b>REF</b> | <b>RAL</b> | <b>RKB</b> | <b>RTR</b> | <b>RJZ</b> |
|------------|------------|------------|------------|------------|------------|------------|------------|------------|
| 0.70       | 0.72       | 0.72       | 0.72       | 0.77       | 0.70       | 0.71       | 0.72       | 0.69       |
| 0.56       | 0.58       | 0.60       | 0.55       | 0.60       | 0.52       | 0.58       | 0.60       | 0.52       |
| 0.56       | 0.53       | 0.58       | 0.50       | 0.50       | 0.46       | 0.48       | 0.55       | 0.53       |
| 0.46       | 0.61       | 0.62       | 0.62       | 0.59       | 0.58       | 0.62       | 0.58       | 0.58       |
| 0.82       | 0.80       | 0.77       | 0.79       | 0.82       | 0.73       | 0.79       | 0.79       | 0.76       |
| 0.71       | 0.71       | 0.74       | 0.74       | 0.75       | 0.66       | 0.74       | 0.74       | 0.71       |
| 0.48       | 0.51       | 0.55       | 0.50       | 0.55       | 0.47       | 0.58       | 0.53       | 0.49       |
| 0.83       | 0.84       | 0.81       | 0.82       | 0.85       | 0.79       | 0.83       | 0.83       | 0.81       |
| 0.73       | 0.78       | 0.74       | 0.78       | 0.76       | 0.73       | 0.75       | 0.74       | 0.74       |
| 0.81       | 0.82       | 0.84       | 0.81       | 0.84       | 0.76       | 0.85       | 0.84       | 0.79       |
| 0.75       | 0.76       | 0.74       | 0.71       | 0.70       | 0.70       | 0.69       | 0.73       | 0.66       |
| 0.81       | 0.82       | 0.86       | 0.85       | 0.87       | 0.84       | 0.86       | 0.89       | 0.82       |
| 0.78       | 0.78       | 0.79       | 0.78       | 0.84       | 0.73       | 0.80       | 0.78       | 0.77       |
| 0.63       | 0.64       | 0.63       | 0.64       | 0.68       | 0.60       | 0.68       | 0.68       | 0.61       |
| 0.89       | 0.85       | 0.82       | 0.83       | 0.83       | 0.85       | 0.78       | 0.88       | 0.82       |
| 0.90       | 0.90       | 0.90       | 0.89       | 0.87       | 0.88       | 0.86       | 0.90       | 0.85       |
| 0.76       | 0.79       | 0.79       | 0.78       | 0.79       | 0.72       | 0.77       | 0.78       | 0.74       |
| 0.67       | 0.66       | 0.70       | 0.65       | 0.68       | 0.64       | 0.65       | 0.66       | 0.69       |
| 0.76       | 0.77       | 0.82       | 0.74       | 0.77       | 0.71       | 0.68       | 0.77       | 0.68       |
| 0.71       | 0.72       | 0.70       | 0.68       | 0.79       | 0.68       | 0.71       | 0.70       | 0.68       |
| 0.61       | 0.62       | 0.56       | 0.59       | 0.64       | 0.57       | 0.56       | 0.66       | 0.56       |
| 0.74       | 0.69       | 0.70       | 0.68       | 0.73       | 0.62       | 0.69       | 0.73       | 0.69       |
| 0.96       | 0.94       | 0.96       | 0.95       | 0.95       | 0.94       | 0.97       | 0.96       | 0.94       |
| 0.89       | 0.84       | 0.88       | 0.83       | 0.85       | 0.84       | 0.82       | 0.84       | 0.78       |
| 0.86       | 0.89       | 0.87       | 0.88       | 0.86       | 0.88       | 0.88       | 0.86       | 0.87       |
| 0.25       | 0.28       | 0.29       | 0.30       | 0.33       | 0.29       | 0.34       | 0.32       | 0.29       |
| 0.61       | 0.63       | 0.57       | 0.57       | 0.67       | 0.52       | 0.60       | 0.65       | 0.51       |
| 0.89       | 0.86       | 0.87       | 0.87       | 0.87       | 0.83       | 0.81       | 0.82       | 0.80       |
| 0.81       | 0.81       | 0.85       | 0.82       | 0.78       | 0.80       | 0.88       | 0.84       | 0.85       |
| 0.81       | 0.79       | 0.84       | 0.86       | 0.80       | 0.73       | 0.86       | 0.80       | 0.79       |
| 0.85       | 0.84       | 0.89       | 0.86       | 0.88       | 0.85       | 0.87       | 0.82       | 0.85       |
| 0.83       | 0.85       | 0.80       | 0.82       | 0.85       | 0.78       | 0.83       | 0.83       | 0.82       |
| 0.93       | 0.94       | 0.96       | 0.95       | 0.97       | 0.92       | 0.94       | 0.94       | 0.95       |
| 0.88       | 0.83       | 0.84       | 0.80       | 0.85       | 0.76       | 0.82       | 0.83       | 0.77       |
| 0.92       | 0.89       | 0.88       | 0.85       | 0.91       | 0.86       | 0.89       | 0.91       | 0.86       |
| 0.80       | 0.74       | 0.79       | 0.81       | 0.79       | 0.74       | 0.83       | 0.78       | 0.81       |
| 0.37       | 0.46       | 0.56       | 0.33       | 0.45       | 0.39       | 0.41       | 0.47       | 0.37       |
| 0.94       | 0.95       | 0.97       | 0.95       | 0.96       | 0.92       | 0.95       | 0.93       | 0.92       |
| 0.73       | 0.70       | 0.73       | 0.69       | 0.66       | 0.69       | 0.63       | 0.67       | 0.64       |
| 0.46       | 0.61       | 0.59       | 0.42       | 0.56       | 0.42       | 0.50       | 0.56       | 0.46       |
| 0.88       | 0.88       | 0.89       | 0.87       | 0.89       | 0.87       | 0.90       | 0.90       | 0.86       |
| 0.90       | 0.86       | 0.85       | 0.84       | 0.92       | 0.84       | 0.90       | 0.91       | 0.84       |

|    |      |      |      |      |      |      |      |      |      |
|----|------|------|------|------|------|------|------|------|------|
| 1  |      |      |      |      |      |      |      |      |      |
| 2  | 0.51 | 0.50 | 0.57 | 0.59 | 0.60 | 0.50 | 0.59 | 0.50 | 0.48 |
| 3  | 0.69 | 0.69 | 0.70 | 0.75 | 0.79 | 0.68 | 0.74 | 0.78 | 0.76 |
| 4  | 0.94 | 0.96 | 0.94 | 0.95 | 0.96 | 0.93 | 0.94 | 0.97 | 0.93 |
| 5  | 0.95 | 0.95 | 0.96 | 0.95 | 0.97 | 0.96 | 0.96 | 0.96 | 0.93 |
| 6  | 0.91 | 0.90 | 0.88 | 0.94 | 0.92 | 0.89 | 0.92 | 0.90 | 0.89 |
| 7  | 0.79 | 0.83 | 0.85 | 0.88 | 0.82 | 0.80 | 0.86 | 0.83 | 0.83 |
| 8  | 0.73 | 0.63 | 0.64 | 0.65 | 0.79 | 0.55 | 0.55 | 0.75 | 0.60 |
| 9  | 0.66 | 0.66 | 0.61 | 0.67 | 0.68 | 0.65 | 0.68 | 0.72 | 0.56 |
| 10 | 0.66 | 0.66 | 0.61 | 0.67 | 0.68 | 0.65 | 0.68 | 0.72 | 0.56 |
| 11 | 0.23 | 0.16 | 0.36 | 0.35 | 0.33 | 0.31 | 0.33 | 0.25 | 0.33 |
| 12 |      |      |      |      |      |      |      |      |      |
| 13 |      |      |      |      |      |      |      |      |      |
| 14 |      |      |      |      |      |      |      |      |      |
| 15 |      |      |      |      |      |      |      |      |      |
| 16 |      |      |      |      |      |      |      |      |      |
| 17 |      |      |      |      |      |      |      |      |      |
| 18 |      |      |      |      |      |      |      |      |      |
| 19 |      |      |      |      |      |      |      |      |      |
| 20 |      |      |      |      |      |      |      |      |      |
| 21 |      |      |      |      |      |      |      |      |      |
| 22 |      |      |      |      |      |      |      |      |      |
| 23 |      |      |      |      |      |      |      |      |      |
| 24 |      |      |      |      |      |      |      |      |      |
| 25 |      |      |      |      |      |      |      |      |      |
| 26 |      |      |      |      |      |      |      |      |      |
| 27 |      |      |      |      |      |      |      |      |      |
| 28 |      |      |      |      |      |      |      |      |      |
| 29 |      |      |      |      |      |      |      |      |      |
| 30 |      |      |      |      |      |      |      |      |      |
| 31 |      |      |      |      |      |      |      |      |      |
| 32 |      |      |      |      |      |      |      |      |      |
| 33 |      |      |      |      |      |      |      |      |      |
| 34 |      |      |      |      |      |      |      |      |      |
| 35 |      |      |      |      |      |      |      |      |      |
| 36 |      |      |      |      |      |      |      |      |      |
| 37 |      |      |      |      |      |      |      |      |      |
| 38 |      |      |      |      |      |      |      |      |      |
| 39 |      |      |      |      |      |      |      |      |      |
| 40 |      |      |      |      |      |      |      |      |      |
| 41 |      |      |      |      |      |      |      |      |      |
| 42 |      |      |      |      |      |      |      |      |      |
| 43 |      |      |      |      |      |      |      |      |      |
| 44 |      |      |      |      |      |      |      |      |      |
| 45 |      |      |      |      |      |      |      |      |      |
| 46 |      |      |      |      |      |      |      |      |      |
| 47 |      |      |      |      |      |      |      |      |      |
| 48 |      |      |      |      |      |      |      |      |      |
| 49 |      |      |      |      |      |      |      |      |      |
| 50 |      |      |      |      |      |      |      |      |      |
| 51 |      |      |      |      |      |      |      |      |      |
| 52 |      |      |      |      |      |      |      |      |      |
| 53 |      |      |      |      |      |      |      |      |      |
| 54 |      |      |      |      |      |      |      |      |      |
| 55 |      |      |      |      |      |      |      |      |      |
| 56 |      |      |      |      |      |      |      |      |      |
| 57 |      |      |      |      |      |      |      |      |      |
| 58 |      |      |      |      |      |      |      |      |      |
| 59 |      |      |      |      |      |      |      |      |      |
| 60 |      |      |      |      |      |      |      |      |      |

For peer review only

1  
2  
3  
4  
5  
6  
7  
8  
9  
10  
11  
12  
13  
14  
15  
16  
17  
18  
19  
20  
21  
22  
23  
24  
25  
26  
27  
28  
29  
30  
31  
32  
33  
34  
35  
36  
37  
38  
39  
40  
41  
42  
43  
44  
45  
46  
47  
48  
49  
50  
51  
52  
53  
54  
55  
56  
57  
58  
59  
60

| <b>RHM</b> | <b>RTG</b> | <b>R1H</b> | <b>RK9</b> | <b>RXW</b> | <b>RR8</b> | <b>RWP</b> | <b>RWF</b> | <b>RJE</b> |
|------------|------------|------------|------------|------------|------------|------------|------------|------------|
| 0.72       | 0.73       | 0.68       | 0.75       | 0.72       | 0.73       | 0.73       | 0.74       | 0.74       |
| 0.55       | 0.62       | 0.52       | 0.59       | 0.55       | 0.61       | 0.58       | 0.58       | 0.59       |
| 0.47       | 0.53       | 0.48       | 0.46       | 0.51       | 0.50       | 0.48       | 0.58       | 0.50       |
| 0.61       | 0.59       | 0.61       | 0.57       | 0.52       | 0.60       | 0.58       | 0.59       | 0.53       |
| 0.73       | 0.78       | 0.72       | 0.75       | 0.75       | 0.81       | 0.80       | 0.80       | 0.79       |
| 0.70       | 0.72       | 0.69       | 0.73       | 0.69       | 0.75       | 0.71       | 0.76       | 0.73       |
| 0.53       | 0.56       | 0.51       | 0.55       | 0.52       | 0.57       | 0.52       | 0.58       | 0.56       |
| 0.84       | 0.87       | 0.79       | 0.85       | 0.85       | 0.85       | 0.84       | 0.84       | 0.86       |
| 0.77       | 0.77       | 0.71       | 0.75       | 0.76       | 0.78       | 0.74       | 0.79       | 0.76       |
| 0.82       | 0.83       | 0.75       | 0.83       | 0.81       | 0.87       | 0.81       | 0.83       | 0.83       |
| 0.69       | 0.71       | 0.71       | 0.70       | 0.67       | 0.77       | 0.71       | 0.70       | 0.68       |
| 0.84       | 0.85       | 0.87       | 0.89       | 0.79       | 0.88       | 0.89       | 0.89       | 0.87       |
| 0.79       | 0.79       | 0.72       | 0.80       | 0.77       | 0.81       | 0.77       | 0.81       | 0.78       |
| 0.62       | 0.67       | 0.59       | 0.68       | 0.63       | 0.67       | 0.63       | 0.67       | 0.67       |
| 0.84       | 0.88       | 0.82       | 0.82       | 0.81       | 0.87       | 0.87       | 0.84       | 0.86       |
| 0.88       | 0.88       | 0.84       | 0.84       | 0.86       | 0.87       | 0.86       | 0.91       | 0.87       |
| 0.78       | 0.77       | 0.70       | 0.78       | 0.77       | 0.81       | 0.79       | 0.80       | 0.76       |
| 0.64       | 0.69       | 0.66       | 0.65       | 0.63       | 0.66       | 0.70       | 0.64       | 0.63       |
| 0.72       | 0.75       | 0.66       | 0.71       | 0.75       | 0.73       | 0.73       | 0.77       | 0.75       |
| 0.68       | 0.75       | 0.63       | 0.74       | 0.69       | 0.71       | 0.70       | 0.73       | 0.75       |
| 0.57       | 0.64       | 0.55       | 0.67       | 0.62       | 0.60       | 0.68       | 0.65       | 0.58       |
| 0.68       | 0.71       | 0.61       | 0.70       | 0.72       | 0.69       | 0.70       | 0.72       | 0.70       |
| 0.94       | 0.97       | 0.94       | 0.97       | 0.97       | 0.97       | 0.95       | 0.96       | 0.95       |
| 0.87       | 0.82       | 0.79       | 0.83       | 0.80       | 0.86       | 0.84       | 0.83       | 0.83       |
| 0.84       | 0.90       | 0.81       | 0.85       | 0.86       | 0.87       | 0.84       | 0.90       | 0.89       |
| 0.25       | 0.36       | 0.32       | 0.29       | 0.34       | 0.45       | 0.35       | 0.34       | 0.46       |
| 0.56       | 0.62       | 0.51       | 0.61       | 0.58       | 0.61       | 0.64       | 0.66       | 0.58       |
| 0.84       | 0.84       | 0.78       | 0.85       | 0.85       | 0.85       | 0.82       | 0.87       | 0.81       |
| 0.83       | 0.83       | 0.79       | 0.85       | 0.82       | 0.83       | 0.83       | 0.82       | 0.83       |
| 0.78       | 0.84       | 0.73       | 0.85       | 0.81       | 0.87       | 0.77       | 0.80       | 0.79       |
| 0.85       | 0.89       | 0.78       | 0.80       | 0.86       | 0.90       | 0.86       | 0.85       | 0.81       |
| 0.82       | 0.86       | 0.76       | 0.85       | 0.82       | 0.84       | 0.81       | 0.85       | 0.84       |
| 0.95       | 0.96       | 0.92       | 0.95       | 0.95       | 0.94       | 0.95       | 0.95       | 0.94       |
| 0.83       | 0.83       | 0.74       | 0.83       | 0.81       | 0.84       | 0.75       | 0.82       | 0.82       |
| 0.87       | 0.87       | 0.79       | 0.90       | 0.87       | 0.88       | 0.90       | 0.90       | 0.87       |
| 0.76       | 0.77       | 0.79       | 0.76       | 0.83       | 0.77       | 0.88       | 0.82       | 0.84       |
| 0.40       | 0.50       | 0.34       | 0.44       | 0.39       | 0.57       | 0.47       | 0.48       | 0.43       |
| 0.95       | 0.95       | 0.91       | 0.93       | 0.94       | 0.96       | 0.94       | 0.93       | 0.93       |
| 0.64       | 0.70       | 0.60       | 0.59       | 0.65       | 0.62       | 0.64       | 0.76       | 0.61       |
| 0.45       | 0.58       | 0.36       | 0.49       | 0.45       | 0.59       | 0.62       | 0.51       | 0.56       |
| 0.86       | 0.92       | 0.84       | 0.87       | 0.88       | 0.91       | 0.91       | 0.90       | 0.89       |
| 0.85       | 0.87       | 0.80       | 0.85       | 0.82       | 0.85       | 0.84       | 0.89       | 0.86       |

|    |      |      |      |      |      |      |      |      |      |
|----|------|------|------|------|------|------|------|------|------|
| 1  |      |      |      |      |      |      |      |      |      |
| 2  | 0.41 | 0.56 | 0.48 | 0.56 | 0.57 | 0.61 | 0.49 | 0.61 | 0.58 |
| 3  | 0.70 | 0.78 | 0.72 | 0.87 | 0.81 | 0.69 | 0.82 | 0.71 | 0.80 |
| 4  | 0.92 | 0.97 | 0.95 | 0.94 | 0.96 | 0.96 | 0.95 | 0.96 | 0.95 |
| 5  | 0.95 | 0.96 | 0.94 | 0.96 | 0.94 | 0.97 | 0.98 | 0.95 | 0.95 |
| 6  | 0.90 | 0.91 | 0.91 | 0.91 | 0.91 | 0.94 | 0.84 | 0.87 | 0.92 |
| 7  | 0.81 | 0.84 | 0.75 | 0.89 | 0.86 | 0.90 | 0.79 | 0.86 | 0.83 |
| 8  | 0.69 | 0.77 | 0.55 | 0.64 | 0.69 | 0.73 | 0.74 | 0.62 | 0.66 |
| 9  | 0.60 | 0.72 | 0.49 | 0.67 | 0.69 | 0.70 | 0.70 | 0.70 | 0.68 |
| 10 | 0.60 | 0.72 | 0.49 | 0.67 | 0.69 | 0.70 | 0.70 | 0.70 | 0.68 |
| 11 | 0.41 | 0.25 | 0.35 | 0.27 | 0.23 | 0.45 | 0.32 | 0.25 | 0.21 |
| 12 |      |      |      |      |      |      |      |      |      |
| 13 |      |      |      |      |      |      |      |      |      |
| 14 |      |      |      |      |      |      |      |      |      |
| 15 |      |      |      |      |      |      |      |      |      |
| 16 |      |      |      |      |      |      |      |      |      |
| 17 |      |      |      |      |      |      |      |      |      |
| 18 |      |      |      |      |      |      |      |      |      |
| 19 |      |      |      |      |      |      |      |      |      |
| 20 |      |      |      |      |      |      |      |      |      |
| 21 |      |      |      |      |      |      |      |      |      |
| 22 |      |      |      |      |      |      |      |      |      |
| 23 |      |      |      |      |      |      |      |      |      |
| 24 |      |      |      |      |      |      |      |      |      |
| 25 |      |      |      |      |      |      |      |      |      |
| 26 |      |      |      |      |      |      |      |      |      |
| 27 |      |      |      |      |      |      |      |      |      |
| 28 |      |      |      |      |      |      |      |      |      |
| 29 |      |      |      |      |      |      |      |      |      |
| 30 |      |      |      |      |      |      |      |      |      |
| 31 |      |      |      |      |      |      |      |      |      |
| 32 |      |      |      |      |      |      |      |      |      |
| 33 |      |      |      |      |      |      |      |      |      |
| 34 |      |      |      |      |      |      |      |      |      |
| 35 |      |      |      |      |      |      |      |      |      |
| 36 |      |      |      |      |      |      |      |      |      |
| 37 |      |      |      |      |      |      |      |      |      |
| 38 |      |      |      |      |      |      |      |      |      |
| 39 |      |      |      |      |      |      |      |      |      |
| 40 |      |      |      |      |      |      |      |      |      |
| 41 |      |      |      |      |      |      |      |      |      |
| 42 |      |      |      |      |      |      |      |      |      |
| 43 |      |      |      |      |      |      |      |      |      |
| 44 |      |      |      |      |      |      |      |      |      |
| 45 |      |      |      |      |      |      |      |      |      |
| 46 |      |      |      |      |      |      |      |      |      |
| 47 |      |      |      |      |      |      |      |      |      |
| 48 |      |      |      |      |      |      |      |      |      |
| 49 |      |      |      |      |      |      |      |      |      |
| 50 |      |      |      |      |      |      |      |      |      |
| 51 |      |      |      |      |      |      |      |      |      |
| 52 |      |      |      |      |      |      |      |      |      |
| 53 |      |      |      |      |      |      |      |      |      |
| 54 |      |      |      |      |      |      |      |      |      |
| 55 |      |      |      |      |      |      |      |      |      |
| 56 |      |      |      |      |      |      |      |      |      |
| 57 |      |      |      |      |      |      |      |      |      |
| 58 |      |      |      |      |      |      |      |      |      |
| 59 |      |      |      |      |      |      |      |      |      |
| 60 |      |      |      |      |      |      |      |      |      |

For peer review only



1  
2  
3  
4  
5  
6  
7  
8  
9  
10  
11  
12  
13  
14  
15  
16  
17  
18  
19  
20  
21  
22  
23  
24  
25  
26  
27  
28  
29  
30  
31  
32  
33  
34  
35  
36  
37  
38  
39  
40  
41  
42  
43  
44  
45  
46  
47  
48  
49  
50  
51  
52  
53  
54  
55  
56  
57  
58  
59  
60

| <b>RGT</b> | <b>RWA</b> | <b>RJ1</b> | <b>RRV</b> | <b>RH8</b> | <b>RVV</b> | <b>RM1</b> | <b>RTD</b> | <b>RTE</b> |
|------------|------------|------------|------------|------------|------------|------------|------------|------------|
| 0.74       | 0.73       | 0.73       | 0.67       | 0.76       | 0.74       | 0.78       | 0.76       | 0.75       |
| 0.58       | 0.56       | 0.59       | 0.57       | 0.65       | 0.53       | 0.58       | 0.60       | 0.59       |
| 0.54       | 0.53       | 0.50       | 0.50       | 0.57       | 0.47       | 0.50       | 0.55       | 0.47       |
| 0.61       | 0.61       | 0.60       | 0.59       | 0.61       | 0.56       | 0.68       | 0.61       | 0.59       |
| 0.82       | 0.76       | 0.77       | 0.73       | 0.84       | 0.77       | 0.77       | 0.81       | 0.82       |
| 0.73       | 0.73       | 0.73       | 0.68       | 0.75       | 0.71       | 0.70       | 0.75       | 0.72       |
| 0.53       | 0.55       | 0.59       | 0.50       | 0.58       | 0.49       | 0.51       | 0.61       | 0.53       |
| 0.82       | 0.85       | 0.83       | 0.81       | 0.86       | 0.83       | 0.84       | 0.87       | 0.85       |
| 0.72       | 0.75       | 0.75       | 0.70       | 0.78       | 0.79       | 0.77       | 0.78       | 0.78       |
| 0.84       | 0.83       | 0.83       | 0.78       | 0.86       | 0.80       | 0.83       | 0.85       | 0.82       |
| 0.75       | 0.76       | 0.70       | 0.72       | 0.79       | 0.69       | 0.71       | 0.78       | 0.74       |
| 0.82       | 0.89       | 0.87       | 0.82       | 0.85       | 0.86       | 0.88       | 0.87       | 0.86       |
| 0.79       | 0.78       | 0.75       | 0.75       | 0.82       | 0.77       | 0.81       | 0.83       | 0.82       |
| 0.67       | 0.67       | 0.67       | 0.61       | 0.71       | 0.57       | 0.66       | 0.70       | 0.67       |
| 0.86       | 0.87       | 0.84       | 0.84       | 0.87       | 0.82       | 0.87       | 0.86       | 0.86       |
| 0.90       | 0.89       | 0.88       | 0.85       | 0.91       | 0.85       | 0.88       | 0.89       | 0.90       |
| 0.81       | 0.77       | 0.77       | 0.75       | 0.82       | 0.75       | 0.77       | 0.83       | 0.77       |
| 0.72       | 0.68       | 0.66       | 0.69       | 0.69       | 0.61       | 0.65       | 0.70       | 0.67       |
| 0.74       | 0.73       | 0.75       | 0.70       | 0.82       | 0.74       | 0.70       | 0.79       | 0.75       |
| 0.71       | 0.65       | 0.69       | 0.64       | 0.76       | 0.68       | 0.72       | 0.72       | 0.68       |
| 0.60       | 0.58       | 0.56       | 0.55       | 0.72       | 0.61       | 0.66       | 0.64       | 0.65       |
| 0.73       | 0.72       | 0.67       | 0.65       | 0.76       | 0.66       | 0.70       | 0.72       | 0.69       |
| 0.95       | 0.95       | 0.97       | 0.94       | 0.98       | 0.94       | 0.96       | 0.95       | 0.97       |
| 0.85       | 0.85       | 0.84       | 0.82       | 0.88       | 0.85       | 0.85       | 0.90       | 0.87       |
| 0.90       | 0.85       | 0.90       | 0.83       | 0.91       | 0.84       | 0.87       | 0.88       | 0.88       |
| 0.30       | 0.35       | 0.35       | 0.32       | 0.29       | 0.31       | 0.31       | 0.33       | 0.23       |
| 0.62       | 0.61       | 0.53       | 0.51       | 0.69       | 0.58       | 0.65       | 0.65       | 0.62       |
| 0.84       | 0.84       | 0.81       | 0.80       | 0.88       | 0.82       | 0.82       | 0.86       | 0.89       |
| 0.82       | 0.83       | 0.85       | 0.83       | 0.85       | 0.80       | 0.82       | 0.87       | 0.85       |
| 0.80       | 0.82       | 0.81       | 0.81       | 0.89       | 0.76       | 0.81       | 0.82       | 0.82       |
| 0.87       | 0.87       | 0.89       | 0.84       | 0.85       | 0.87       | 0.85       | 0.86       | 0.84       |
| 0.83       | 0.82       | 0.81       | 0.74       | 0.87       | 0.81       | 0.83       | 0.84       | 0.83       |
| 0.95       | 0.92       | 0.94       | 0.95       | 0.97       | 0.93       | 0.94       | 0.96       | 0.95       |
| 0.84       | 0.81       | 0.78       | 0.79       | 0.85       | 0.81       | 0.84       | 0.84       | 0.84       |
| 0.91       | 0.90       | 0.85       | 0.86       | 0.92       | 0.86       | 0.89       | 0.88       | 0.89       |
| 0.80       | 0.85       | 0.79       | 0.78       | 0.86       | 0.72       | 0.77       | 0.76       | 0.83       |
| 0.42       | 0.42       | 0.39       | 0.35       | 0.53       | 0.38       | 0.48       | 0.53       | 0.48       |
| 0.95       | 0.95       | 0.95       | 0.93       | 0.96       | 0.93       | 0.94       | 0.94       | 0.93       |
| 0.70       | 0.60       | 0.73       | 0.68       | 0.79       | 0.65       | 0.56       | 0.71       | 0.66       |
| 0.52       | 0.48       | 0.46       | 0.44       | 0.63       | 0.51       | 0.56       | 0.61       | 0.58       |
| 0.91       | 0.88       | 0.89       | 0.88       | 0.92       | 0.84       | 0.92       | 0.90       | 0.90       |
| 0.85       | 0.87       | 0.82       | 0.83       | 0.90       | 0.78       | 0.85       | 0.89       | 0.85       |

|    |      |      |      |      |      |      |      |      |      |
|----|------|------|------|------|------|------|------|------|------|
| 1  |      |      |      |      |      |      |      |      |      |
| 2  | 0.55 | 0.59 | 0.55 | 0.59 | 0.66 | 0.51 | 0.63 | 0.49 | 0.57 |
| 3  | 0.71 | 0.71 | 0.75 | 0.73 | 0.75 | 0.67 | 0.75 | 0.74 | 0.76 |
| 4  | 0.97 | 0.95 | 0.94 | 0.94 | 0.97 | 0.96 | 0.95 | 0.97 | 0.93 |
| 5  | 0.96 | 0.97 | 0.96 | 0.96 | 0.97 | 0.93 | 0.98 | 0.97 | 0.97 |
| 6  | 0.94 | 0.88 | 0.92 | 0.94 | 0.91 | 0.85 | 0.94 | 0.89 | 0.84 |
| 7  | 0.85 | 0.83 | 0.84 | 0.86 | 0.94 | 0.77 | 0.89 | 0.81 | 0.88 |
| 8  | 0.62 | 0.71 | 0.60 | 0.66 | 0.79 | 0.63 | 0.67 | 0.79 | 0.77 |
| 9  | 0.62 | 0.66 | 0.62 | 0.53 | 0.73 | 0.66 | 0.76 | 0.69 | 0.61 |
| 10 | 0.62 | 0.66 | 0.62 | 0.53 | 0.73 | 0.66 | 0.76 | 0.69 | 0.61 |
| 11 | 0.51 | 0.26 | 0.47 | 0.54 | 0.27 | 0.22 | 0.22 | 0.27 | 0.23 |
| 12 |      |      |      |      |      |      |      |      |      |
| 13 |      |      |      |      |      |      |      |      |      |
| 14 |      |      |      |      |      |      |      |      |      |
| 15 |      |      |      |      |      |      |      |      |      |
| 16 |      |      |      |      |      |      |      |      |      |
| 17 |      |      |      |      |      |      |      |      |      |
| 18 |      |      |      |      |      |      |      |      |      |
| 19 |      |      |      |      |      |      |      |      |      |
| 20 |      |      |      |      |      |      |      |      |      |
| 21 |      |      |      |      |      |      |      |      |      |
| 22 |      |      |      |      |      |      |      |      |      |
| 23 |      |      |      |      |      |      |      |      |      |
| 24 |      |      |      |      |      |      |      |      |      |
| 25 |      |      |      |      |      |      |      |      |      |
| 26 |      |      |      |      |      |      |      |      |      |
| 27 |      |      |      |      |      |      |      |      |      |
| 28 |      |      |      |      |      |      |      |      |      |
| 29 |      |      |      |      |      |      |      |      |      |
| 30 |      |      |      |      |      |      |      |      |      |
| 31 |      |      |      |      |      |      |      |      |      |
| 32 |      |      |      |      |      |      |      |      |      |
| 33 |      |      |      |      |      |      |      |      |      |
| 34 |      |      |      |      |      |      |      |      |      |
| 35 |      |      |      |      |      |      |      |      |      |
| 36 |      |      |      |      |      |      |      |      |      |
| 37 |      |      |      |      |      |      |      |      |      |
| 38 |      |      |      |      |      |      |      |      |      |
| 39 |      |      |      |      |      |      |      |      |      |
| 40 |      |      |      |      |      |      |      |      |      |
| 41 |      |      |      |      |      |      |      |      |      |
| 42 |      |      |      |      |      |      |      |      |      |
| 43 |      |      |      |      |      |      |      |      |      |
| 44 |      |      |      |      |      |      |      |      |      |
| 45 |      |      |      |      |      |      |      |      |      |
| 46 |      |      |      |      |      |      |      |      |      |
| 47 |      |      |      |      |      |      |      |      |      |
| 48 |      |      |      |      |      |      |      |      |      |
| 49 |      |      |      |      |      |      |      |      |      |
| 50 |      |      |      |      |      |      |      |      |      |
| 51 |      |      |      |      |      |      |      |      |      |
| 52 |      |      |      |      |      |      |      |      |      |
| 53 |      |      |      |      |      |      |      |      |      |
| 54 |      |      |      |      |      |      |      |      |      |
| 55 |      |      |      |      |      |      |      |      |      |
| 56 |      |      |      |      |      |      |      |      |      |
| 57 |      |      |      |      |      |      |      |      |      |
| 58 |      |      |      |      |      |      |      |      |      |
| 59 |      |      |      |      |      |      |      |      |      |
| 60 |      |      |      |      |      |      |      |      |      |

For peer review only

1  
2  
3  
4  
5  
6  
7  
8  
9  
10  
11  
12  
13  
14  
15  
16  
17  
18  
19  
20  
21  
22  
23  
24  
25  
26  
27  
28  
29  
30  
31  
32  
33  
34  
35  
36  
37  
38  
39  
40  
41  
42  
43  
44  
45  
46  
47  
48  
49  
50  
51  
52  
53  
54  
55  
56  
57  
58  
59  
60

|  | <b>RWE</b> | <b>RTH</b> | <b>RHQ</b> | <b>RPY</b> |
|--|------------|------------|------------|------------|
|  | 0.68       | 0.73       | 0.74       | 0.71       |
|  | 0.56       | 0.62       | 0.59       | 0.58       |
|  | 0.47       | 0.53       | 0.53       | 0.59       |
|  | 0.57       | 0.57       | 0.61       | 0.63       |
|  | 0.78       | 0.80       | 0.77       | 0.82       |
|  | 0.68       | 0.74       | 0.76       | 0.70       |
|  | 0.50       | 0.58       | 0.57       | 0.53       |
|  | 0.81       | 0.83       | 0.82       | 0.80       |
|  | 0.73       | 0.79       | 0.76       | 0.73       |
|  | 0.81       | 0.83       | 0.85       | 0.79       |
|  | 0.67       | 0.74       | 0.72       | 0.78       |
|  | 0.86       | 0.85       | 0.90       | 0.90       |
|  | 0.76       | 0.79       | 0.78       | 0.80       |
|  | 0.61       | 0.66       | 0.67       | 0.64       |
|  | 0.83       | 0.89       | 0.83       | 0.85       |
|  | 0.85       | 0.90       | 0.87       | 0.92       |
|  | 0.75       | 0.79       | 0.78       | 0.77       |
|  | 0.62       | 0.66       | 0.69       | 0.73       |
|  | 0.72       | 0.75       | 0.77       | 0.80       |
|  | 0.70       | 0.74       | 0.69       | 0.69       |
|  | 0.57       | 0.68       | 0.61       | 0.55       |
|  | 0.66       | 0.70       | 0.69       | 0.72       |
|  | 0.95       | 0.95       | 0.97       | 0.97       |
|  | 0.80       | 0.87       | 0.85       | 0.87       |
|  | 0.83       | 0.88       | 0.88       | 0.90       |
|  | 0.29       | 0.34       | 0.34       | 0.26       |
|  | 0.59       | 0.63       | 0.61       | 0.55       |
|  | 0.81       | 0.85       | 0.83       | 0.89       |
|  | 0.79       | 0.82       | 0.87       | 0.87       |
|  | 0.76       | 0.83       | 0.83       | 0.79       |
|  | 0.84       | 0.89       | 0.87       | 0.88       |
|  | 0.81       | 0.82       | 0.84       | 0.78       |
|  | 0.94       | 0.94       | 0.94       | 0.97       |
|  | 0.77       | 0.83       | 0.82       | 0.85       |
|  | 0.87       | 0.89       | 0.89       | 0.86       |
|  | 0.78       | 0.75       | 0.80       | 0.80       |
|  | 0.44       | 0.44       | 0.46       | 0.39       |
|  | 0.94       | 0.95       | 0.96       | 0.97       |
|  | 0.62       | 0.73       | 0.67       | 0.79       |
|  | 0.51       | 0.54       | 0.56       | 0.48       |
|  | 0.88       | 0.88       | 0.89       | 0.91       |
|  | 0.87       | 0.85       | 0.87       | 0.83       |

|    |      |      |      |      |
|----|------|------|------|------|
| 1  |      |      |      |      |
| 2  | 0.55 | 0.59 | 0.59 | 0.57 |
| 3  | 0.75 | 0.73 | 0.76 | 0.82 |
| 4  | 0.97 | 0.96 | 0.93 | 0.97 |
| 5  | 0.95 | 0.96 | 0.95 | 0.96 |
| 6  | 0.89 | 0.89 | 0.91 | 0.94 |
| 7  | 0.76 | 0.88 | 0.89 | 0.82 |
| 8  | 0.75 | 0.73 | 0.67 | 0.65 |
| 9  | 0.56 | 0.68 | 0.64 | 0.59 |
| 10 | 0.32 | 0.43 | 0.37 | 0.56 |
| 11 |      |      |      |      |
| 12 |      |      |      |      |
| 13 |      |      |      |      |
| 14 |      |      |      |      |
| 15 |      |      |      |      |
| 16 |      |      |      |      |
| 17 |      |      |      |      |
| 18 |      |      |      |      |
| 19 |      |      |      |      |
| 20 |      |      |      |      |
| 21 |      |      |      |      |
| 22 |      |      |      |      |
| 23 |      |      |      |      |
| 24 |      |      |      |      |
| 25 |      |      |      |      |
| 26 |      |      |      |      |
| 27 |      |      |      |      |
| 28 |      |      |      |      |
| 29 |      |      |      |      |
| 30 |      |      |      |      |
| 31 |      |      |      |      |
| 32 |      |      |      |      |
| 33 |      |      |      |      |
| 34 |      |      |      |      |
| 35 |      |      |      |      |
| 36 |      |      |      |      |
| 37 |      |      |      |      |
| 38 |      |      |      |      |
| 39 |      |      |      |      |
| 40 |      |      |      |      |
| 41 |      |      |      |      |
| 42 |      |      |      |      |
| 43 |      |      |      |      |
| 44 |      |      |      |      |
| 45 |      |      |      |      |
| 46 |      |      |      |      |
| 47 |      |      |      |      |
| 48 |      |      |      |      |
| 49 |      |      |      |      |
| 50 |      |      |      |      |
| 51 |      |      |      |      |
| 52 |      |      |      |      |
| 53 |      |      |      |      |
| 54 |      |      |      |      |
| 55 |      |      |      |      |
| 56 |      |      |      |      |
| 57 |      |      |      |      |
| 58 |      |      |      |      |
| 59 |      |      |      |      |
| 60 |      |      |      |      |

For peer review only

**Table 3.** Main central grid: Reliability of hospital scores by question for each of the 146 hospitals included between hospital variance starting with the question with the lowest variance ( Q10 with between hospital variance 0.0151), starting with the hospital with the lowest sample size (RQX with sample size equal to 31). These

**Notes**

- The **between hospital variance** is given in a log-odds scale. These variances are the direct output of the reliability analysis.
- The **sample size** is the number of completed questionnaires received by the corresponding hospital.
- Entries with NA come from hospitals which received less than 21 responses for the corresponding question.

| Between Hospital Variance | Sample Size | Hospitals |      |      |      |      |      |
|---------------------------|-------------|-----------|------|------|------|------|------|
|                           |             | Questions | RQX  | RRJ  | RT3  | RMP  | RPC  |
| 0.0151                    | 31          | Q10       | 0.09 | 0.09 | 0.11 | 0.14 | 0.17 |
| 0.0154                    | 32          | Q49       | 0.08 | 0.09 | 0.14 | 0.18 | 0.16 |
| 0.0159                    | 53          | Q35       | NA   | 0.08 | 0.11 | 0.14 | 0.11 |
| 0.0162                    | 71          | Q45       | NA   | NA   | NA   | 0.06 | NA   |
| 0.0168                    | 71          | Q26       | 0.06 | 0.08 | 0.11 | 0.11 | 0.14 |
| 0.0178                    |             | Q13       | 0.10 | 0.11 | 0.15 | 0.18 | 0.19 |
| 0.0182                    |             | Q15       | 0.11 | 0.11 | 0.13 | 0.21 | 0.19 |
| 0.0198                    |             | Q9        | 0.09 | 0.09 | 0.11 | 0.08 | 0.14 |
| 0.0200                    |             | Q1        | 0.07 | 0.09 | 0.12 | 0.18 | 0.11 |
| 0.0207                    |             | Q12       | 0.11 | 0.06 | 0.13 | 0.11 | 0.15 |
| 0.0216                    |             | Q30       | NA   | 0.11 | 0.16 | 0.14 | 0.10 |
| 0.0227                    |             | Q44       | NA   | NA   | NA   | 0.06 | NA   |
| 0.0234                    |             | Q7        | 0.11 | 0.11 | 0.13 | 0.19 | 0.20 |
| 0.0249                    |             | Q14       | 0.15 | 0.16 | 0.21 | 0.23 | 0.27 |
| 0.0273                    |             | Q34       | 0.05 | 0.03 | 0.11 | 0.09 | 0.13 |
| 0.0280                    |             | Q37       | NA   | 0.05 | 0.11 | 0.11 | 0.11 |
| 0.0280                    |             | Q16       | 0.14 | 0.14 | 0.20 | 0.20 | 0.26 |
| 0.0293                    |             | Q48       | NA   | NA   | NA   | NA   | NA   |
| 0.0296                    |             | Q31       | 0.11 | 0.14 | 0.18 | 0.19 | 0.21 |
| 0.0321                    |             | Q11       | 0.18 | 0.16 | 0.22 | 0.27 | 0.27 |
| 0.0328                    |             | Q53       | 0.11 | 0.15 | 0.22 | 0.27 | 0.22 |
| 0.0332                    |             | Q41       | 0.14 | NA   | 0.16 | 0.22 | 0.24 |
| 0.0337                    |             | Q25       | 0.10 | 0.06 | 0.09 | 0.03 | 0.09 |
| 0.0349                    |             | Q29       | NA   | 0.09 | 0.14 | 0.14 | 0.14 |
| 0.0350                    |             | Q6        | 0.09 | 0.11 | 0.11 | 0.21 | 0.12 |
| 0.0371                    |             | Q55       | 0.11 | 0.19 | 0.25 | 0.31 | 0.29 |
| 0.0374                    |             | Q54       | 0.20 | 0.23 | 0.30 | 0.35 | 0.36 |
| 0.0383                    |             | Q36       | 0.11 | 0.15 | 0.12 | 0.10 | 0.15 |
| 0.0387                    |             | Q47       | NA   | NA   | NA   | 0.09 | NA   |
| 0.0395                    |             | Q21       | 0.19 | 0.15 | 0.14 | 0.21 | 0.17 |
| 0.0414                    |             | Q38       | NA   | 0.12 | 0.20 | 0.16 | 0.16 |
| 0.0439                    |             | Q2        | 0.13 | 0.24 | 0.21 | 0.24 | 0.29 |
| 0.0475                    |             | Q5        | 0.00 | 0.04 | 0.08 | 0.08 | 0.18 |
| 0.0483                    |             | Q28       | NA   | 0.14 | 0.30 | 0.23 | 0.30 |

|    |        |            |      |      |      |      |      |  |
|----|--------|------------|------|------|------|------|------|--|
| 1  |        |            |      |      |      |      |      |  |
| 2  | 0.0497 | <b>Q19</b> | NA   | NA   | 0.09 | 0.16 | 0.23 |  |
| 3  | 0.0532 | <b>Q23</b> | NA   | NA   | NA   | 0.19 | 0.17 |  |
| 4  | 0.0564 | <b>Q51</b> | NA   | NA   | NA   | 0.28 | NA   |  |
| 5  | 0.0607 | <b>Q39</b> | NA   | 0.20 | 0.10 | 0.10 | 0.18 |  |
| 6  | 0.0615 | <b>Q32</b> | NA   | 0.20 | 0.34 | 0.43 | 0.35 |  |
| 7  | 0.0727 | <b>Q50</b> | NA   | 0.29 | 0.28 | 0.48 | 0.34 |  |
| 8  | 0.0740 | <b>Q56</b> | 0.24 | 0.21 | 0.12 | 0.29 | 0.32 |  |
| 9  | 0.0778 | <b>Q18</b> | NA   | 0.07 | 0.25 | 0.26 | 0.32 |  |
| 10 | 0.0793 | <b>Q22</b> | NA   | NA   | 0.34 | 0.37 | 0.32 |  |
| 11 | 0.0836 | <b>Q8</b>  | 0.28 | 0.31 | 0.40 | 0.47 | 0.53 |  |
| 12 | 0.0849 | <b>Q52</b> | 0.22 | 0.14 | 0.31 | 0.00 | 0.19 |  |
| 13 | 0.0881 | <b>Q42</b> | 0.14 | 0.00 | 0.08 | 0.15 | 0.29 |  |
| 14 | 0.0936 | <b>Q17</b> | 0.35 | 0.20 | 0.21 | 0.15 | 0.48 |  |
| 15 | 0.1046 | <b>Q20</b> | NA   | 0.26 | 0.31 | 0.36 | 0.45 |  |
| 16 | 0.1084 | <b>Q33</b> | 0.35 | 0.38 | 0.54 | 0.57 | 0.54 |  |
| 17 | 0.1341 | <b>Q57</b> | 0.49 | 0.51 | 0.44 | 0.70 | 0.57 |  |
| 18 | 0.1930 | <b>Q58</b> | 0.54 | 0.47 | 0.62 | 0.72 | 0.60 |  |
| 19 |        |            |      |      |      |      |      |  |
| 20 |        |            |      |      |      |      |      |  |
| 21 |        |            |      |      |      |      |      |  |
| 22 |        |            |      |      |      |      |      |  |
| 23 |        |            |      |      |      |      |      |  |
| 24 |        |            |      |      |      |      |      |  |
| 25 |        |            |      |      |      |      |      |  |
| 26 |        |            |      |      |      |      |      |  |
| 27 |        |            |      |      |      |      |      |  |
| 28 |        |            |      |      |      |      |      |  |
| 29 |        |            |      |      |      |      |      |  |
| 30 |        |            |      |      |      |      |      |  |
| 31 |        |            |      |      |      |      |      |  |
| 32 |        |            |      |      |      |      |      |  |
| 33 |        |            |      |      |      |      |      |  |
| 34 |        |            |      |      |      |      |      |  |
| 35 |        |            |      |      |      |      |      |  |
| 36 |        |            |      |      |      |      |      |  |
| 37 |        |            |      |      |      |      |      |  |
| 38 |        |            |      |      |      |      |      |  |
| 39 |        |            |      |      |      |      |      |  |
| 40 |        |            |      |      |      |      |      |  |
| 41 |        |            |      |      |      |      |      |  |
| 42 |        |            |      |      |      |      |      |  |
| 43 |        |            |      |      |      |      |      |  |
| 44 |        |            |      |      |      |      |      |  |
| 45 |        |            |      |      |      |      |      |  |
| 46 |        |            |      |      |      |      |      |  |
| 47 |        |            |      |      |      |      |      |  |
| 48 |        |            |      |      |      |      |      |  |
| 49 |        |            |      |      |      |      |      |  |
| 50 |        |            |      |      |      |      |      |  |
| 51 |        |            |      |      |      |      |      |  |
| 52 |        |            |      |      |      |      |      |  |
| 53 |        |            |      |      |      |      |      |  |
| 54 |        |            |      |      |      |      |      |  |
| 55 |        |            |      |      |      |      |      |  |
| 56 |        |            |      |      |      |      |      |  |
| 57 |        |            |      |      |      |      |      |  |
| 58 |        |            |      |      |      |      |      |  |
| 59 |        |            |      |      |      |      |      |  |
| 60 |        |            |      |      |      |      |      |  |

included in the analysis (CPES 2016). The questions are ordered according to their hospital variance equal to 0.0151). The hospitals are ordered according to their sample values correspond to the cells in Figure 3.

of each of the 51 fitted logisted regression models.

al.

; question.

|     | 73   | 74   | 76   | 102  | 108  | 111  | 112  | 115  | 122  |
|-----|------|------|------|------|------|------|------|------|------|
| REP | 0.17 | 0.18 | 0.12 | 0.18 | 0.23 | 0.27 | 0.26 | 0.28 | 0.26 |
| RAN | 0.20 | 0.19 | 0.18 | 0.23 | 0.24 | 0.24 | 0.24 | 0.23 | 0.25 |
| RGM | 0.16 | 0.14 | 0.11 | 0.19 | 0.16 | 0.16 | 0.14 | 0.16 | 0.12 |
| RBQ | NA   |
| R1F | 0.13 | 0.15 | 0.11 | 0.17 | 0.16 | 0.14 | 0.15 | 0.14 | 0.13 |
| RKE | 0.20 | 0.21 | 0.15 | 0.22 | 0.28 | 0.29 | 0.27 | 0.25 | 0.29 |
| RE9 | 0.23 | 0.21 | 0.20 | 0.27 | 0.29 | 0.30 | 0.30 | 0.31 | 0.31 |
| RJ6 | 0.18 | 0.19 | 0.05 | 0.23 | 0.20 | 0.20 | 0.16 | 0.20 | 0.28 |
| RVY | 0.16 | 0.21 | 0.13 | 0.24 | 0.21 | 0.24 | 0.22 | 0.24 | 0.23 |
|     | 0.10 | 0.13 | 0.07 | 0.18 | 0.26 | 0.23 | 0.23 | 0.19 | 0.24 |
|     | 0.15 | 0.21 | 0.11 | 0.22 | 0.20 | 0.14 | 0.19 | 0.23 | 0.17 |
|     | NA   | NA   | NA   | NA   | NA   | 0.07 | NA   | 0.04 | NA   |
|     | 0.14 | 0.25 | 0.14 | 0.27 | 0.27 | 0.26 | 0.30 | 0.29 | 0.22 |
|     | 0.26 | 0.28 | 0.26 | 0.34 | 0.38 | 0.34 | 0.32 | 0.36 | 0.40 |
|     | 0.05 | 0.09 | 0.09 | 0.23 | 0.28 | 0.11 | 0.14 | 0.19 | 0.19 |
|     | 0.13 | 0.18 | 0.07 | 0.18 | 0.21 | 0.09 | 0.11 | 0.20 | 0.16 |
|     | 0.26 | 0.27 | 0.12 | 0.30 | 0.37 | 0.35 | 0.34 | 0.36 | 0.32 |
|     | NA   | NA   | NA   | 0.13 | 0.16 | 0.24 | 0.23 | 0.17 | 0.20 |
|     | 0.24 | 0.28 | 0.23 | 0.24 | 0.29 | 0.22 | 0.25 | 0.31 | 0.24 |
|     | 0.32 | 0.31 | 0.25 | 0.39 | 0.40 | 0.39 | 0.37 | 0.39 | 0.36 |
|     | 0.28 | 0.31 | 0.28 | 0.37 | 0.36 | 0.36 | 0.40 | 0.37 | 0.40 |
|     | 0.21 | 0.26 | 0.25 | 0.32 | 0.34 | 0.34 | 0.34 | 0.34 | 0.34 |
|     | 0.03 | 0.15 | 0.00 | 0.00 | 0.09 | 0.03 | 0.13 | 0.14 | 0.09 |
|     | 0.12 | 0.20 | 0.09 | 0.28 | 0.22 | 0.21 | 0.24 | 0.26 | 0.16 |
|     | 0.18 | 0.34 | 0.16 | 0.23 | 0.30 | 0.22 | 0.14 | 0.26 | 0.24 |
|     | 0.31 | 0.27 | 0.36 | 0.40 | 0.44 | 0.42 | 0.43 | 0.41 | 0.40 |
|     | 0.39 | 0.40 | 0.34 | 0.47 | 0.49 | 0.45 | 0.45 | 0.47 | 0.51 |
|     | 0.17 | 0.24 | 0.07 | 0.25 | 0.21 | 0.12 | 0.22 | 0.24 | 0.21 |
|     | NA   | NA   | NA   | NA   | 0.14 | 0.21 | 0.10 | 0.15 | 0.26 |
|     | 0.13 | 0.23 | 0.13 | 0.36 | 0.35 | 0.29 | 0.24 | 0.23 | 0.32 |
|     | 0.11 | 0.26 | 0.10 | 0.19 | 0.26 | 0.16 | 0.28 | 0.26 | 0.28 |
|     | 0.33 | 0.44 | 0.14 | 0.36 | 0.40 | 0.36 | 0.33 | 0.40 | 0.41 |
|     | 0.08 | 0.18 | 0.12 | 0.21 | 0.28 | 0.26 | 0.12 | 0.32 | 0.18 |
|     | 0.23 | 0.36 | 0.25 | 0.47 | 0.39 | 0.27 | 0.31 | 0.40 | 0.23 |

|    |      |      |      |      |      |      |      |      |      |
|----|------|------|------|------|------|------|------|------|------|
| 1  |      |      |      |      |      |      |      |      |      |
| 2  | 0.23 | 0.28 | 0.09 | 0.36 | 0.30 | 0.27 | 0.24 | 0.16 | 0.16 |
| 3  | 0.15 | 0.28 | 0.17 | 0.25 | 0.23 | 0.17 | 0.26 | 0.33 | 0.32 |
| 4  | 0.20 | 0.35 | 0.23 | 0.44 | 0.33 | 0.33 | 0.32 | 0.31 | 0.33 |
| 5  | 0.11 | 0.22 | 0.10 | 0.30 | 0.28 | 0.10 | 0.10 | 0.28 | 0.32 |
| 6  | 0.40 | 0.41 | 0.33 | 0.45 | 0.52 | 0.43 | 0.43 | 0.50 | 0.43 |
| 7  | 0.40 | 0.49 | 0.38 | 0.58 | 0.53 | 0.52 | 0.52 | 0.50 | 0.51 |
| 8  | 0.26 | 0.44 | 0.18 | 0.29 | 0.50 | 0.26 | 0.26 | 0.40 | 0.36 |
| 9  | 0.22 | 0.44 | 0.30 | 0.36 | 0.48 | 0.41 | 0.23 | 0.13 | 0.49 |
| 10 | 0.36 | 0.43 | 0.41 | 0.53 | 0.53 | 0.42 | 0.57 | 0.49 | 0.51 |
| 11 | 0.55 | 0.53 | 0.40 | 0.58 | 0.62 | 0.59 | 0.43 | 0.58 | 0.66 |
| 12 | 0.19 | 0.28 | 0.20 | 0.29 | 0.32 | 0.32 | 0.08 | 0.29 | 0.20 |
| 13 | 0.00 | 0.20 | 0.08 | 0.20 | 0.29 | 0.25 | 0.20 | 0.20 | 0.00 |
| 14 | 0.21 | 0.42 | 0.37 | 0.46 | 0.46 | 0.21 | 0.26 | 0.50 | 0.58 |
| 15 | 0.23 | 0.46 | 0.28 | 0.60 | 0.58 | 0.29 | 0.52 | 0.45 | 0.58 |
| 16 | 0.54 | 0.62 | 0.45 | 0.65 | 0.67 | 0.56 | 0.52 | 0.67 | 0.52 |
| 17 | 0.69 | 0.70 | 0.63 | 0.74 | 0.71 | 0.76 | 0.69 | 0.76 | 0.77 |
| 18 | 0.73 | 0.77 | 0.77 | 0.81 | 0.56 | 0.82 | 0.79 | 0.79 | 0.69 |
| 19 |      |      |      |      |      |      |      |      |      |
| 20 |      |      |      |      |      |      |      |      |      |
| 21 |      |      |      |      |      |      |      |      |      |
| 22 |      |      |      |      |      |      |      |      |      |
| 23 |      |      |      |      |      |      |      |      |      |
| 24 |      |      |      |      |      |      |      |      |      |
| 25 |      |      |      |      |      |      |      |      |      |
| 26 |      |      |      |      |      |      |      |      |      |
| 27 |      |      |      |      |      |      |      |      |      |
| 28 |      |      |      |      |      |      |      |      |      |
| 29 |      |      |      |      |      |      |      |      |      |
| 30 |      |      |      |      |      |      |      |      |      |
| 31 |      |      |      |      |      |      |      |      |      |
| 32 |      |      |      |      |      |      |      |      |      |
| 33 |      |      |      |      |      |      |      |      |      |
| 34 |      |      |      |      |      |      |      |      |      |
| 35 |      |      |      |      |      |      |      |      |      |
| 36 |      |      |      |      |      |      |      |      |      |
| 37 |      |      |      |      |      |      |      |      |      |
| 38 |      |      |      |      |      |      |      |      |      |
| 39 |      |      |      |      |      |      |      |      |      |
| 40 |      |      |      |      |      |      |      |      |      |
| 41 |      |      |      |      |      |      |      |      |      |
| 42 |      |      |      |      |      |      |      |      |      |
| 43 |      |      |      |      |      |      |      |      |      |
| 44 |      |      |      |      |      |      |      |      |      |
| 45 |      |      |      |      |      |      |      |      |      |
| 46 |      |      |      |      |      |      |      |      |      |
| 47 |      |      |      |      |      |      |      |      |      |
| 48 |      |      |      |      |      |      |      |      |      |
| 49 |      |      |      |      |      |      |      |      |      |
| 50 |      |      |      |      |      |      |      |      |      |
| 51 |      |      |      |      |      |      |      |      |      |
| 52 |      |      |      |      |      |      |      |      |      |
| 53 |      |      |      |      |      |      |      |      |      |
| 54 |      |      |      |      |      |      |      |      |      |
| 55 |      |      |      |      |      |      |      |      |      |
| 56 |      |      |      |      |      |      |      |      |      |
| 57 |      |      |      |      |      |      |      |      |      |
| 58 |      |      |      |      |      |      |      |      |      |
| 59 |      |      |      |      |      |      |      |      |      |
| 60 |      |      |      |      |      |      |      |      |      |



1  
2  
3  
4  
5  
6  
7  
8  
9  
10  
11  
12  
13  
14  
15  
16  
17  
18  
19  
20  
21  
22  
23  
24  
25  
26  
27  
28  
29  
30  
31  
32  
33  
34  
35  
36  
37  
38  
39  
40  
41  
42  
43  
44  
45  
46  
47  
48  
49  
50  
51  
52  
53  
54  
55  
56  
57  
58  
59  
60

133 136 138 141 147 151 152 158 170

| RA4  | RJN  | RAS  | RFR  | RAX  | RWW  | RM3  | RQM  | RVR  |
|------|------|------|------|------|------|------|------|------|
| 0.25 | 0.27 | 0.29 | 0.23 | 0.33 | 0.32 | 0.31 | 0.33 | 0.37 |
| 0.27 | 0.26 | 0.30 | 0.30 | 0.30 | 0.30 | 0.30 | 0.30 | 0.31 |
| 0.16 | 0.14 | 0.19 | 0.19 | 0.20 | 0.20 | 0.24 | 0.20 | 0.18 |
| NA   | 0.11 | 0.09 | 0.07 | NA   | 0.09 | 0.10 | 0.11 | NA   |
| 0.19 | 0.17 | 0.18 | 0.12 | 0.17 | 0.19 | 0.18 | 0.19 | 0.16 |
| 0.30 | 0.34 | 0.33 | 0.30 | 0.35 | 0.36 | 0.28 | 0.36 | 0.37 |
| 0.34 | 0.35 | 0.35 | 0.34 | 0.33 | 0.37 | 0.37 | 0.38 | 0.39 |
| 0.24 | 0.21 | 0.22 | 0.20 | 0.26 | 0.28 | 0.22 | 0.29 | 0.32 |
| 0.21 | 0.22 | 0.28 | 0.21 | 0.29 | 0.23 | 0.27 | 0.28 | 0.35 |
| 0.25 | 0.26 | 0.23 | 0.19 | 0.28 | 0.29 | 0.21 | 0.33 | 0.30 |
| 0.17 | 0.17 | 0.25 | 0.17 | 0.25 | 0.25 | 0.25 | 0.22 | 0.25 |
| 0.04 | 0.07 | 0.09 | 0.06 | NA   | 0.11 | 0.07 | 0.07 | NA   |
| 0.34 | 0.21 | 0.34 | 0.31 | 0.34 | 0.36 | 0.27 | 0.34 | 0.36 |
| 0.36 | 0.41 | 0.40 | 0.39 | 0.45 | 0.45 | 0.41 | 0.46 | 0.46 |
| 0.22 | 0.20 | 0.21 | 0.17 | 0.24 | 0.27 | 0.26 | 0.24 | 0.18 |
| 0.15 | 0.16 | 0.21 | 0.17 | 0.23 | 0.20 | 0.26 | 0.31 | 0.22 |
| 0.31 | 0.31 | 0.39 | 0.36 | 0.38 | 0.46 | 0.33 | 0.47 | 0.42 |
| 0.25 | 0.27 | 0.26 | 0.28 | 0.25 | 0.21 | 0.13 | 0.30 | 0.23 |
| 0.31 | 0.22 | 0.35 | 0.24 | 0.35 | 0.31 | 0.41 | 0.37 | 0.35 |
| 0.42 | 0.37 | 0.41 | 0.38 | 0.44 | 0.48 | 0.41 | 0.50 | 0.48 |
| 0.38 | 0.43 | 0.40 | 0.37 | 0.42 | 0.43 | 0.46 | 0.44 | 0.41 |
| 0.34 | 0.41 | 0.42 | 0.38 | 0.40 | 0.43 | 0.34 | 0.46 | 0.39 |
| 0.06 | 0.16 | 0.09 | 0.03 | 0.09 | 0.14 | 0.14 | 0.18 | 0.15 |
| 0.30 | 0.16 | 0.27 | 0.18 | 0.33 | 0.27 | 0.27 | 0.25 | 0.25 |
| 0.30 | 0.19 | 0.31 | 0.26 | 0.24 | 0.43 | 0.29 | 0.32 | 0.39 |
| 0.44 | 0.47 | 0.49 | 0.51 | 0.43 | 0.49 | 0.51 | 0.49 | 0.51 |
| 0.50 | 0.51 | 0.54 | 0.50 | 0.54 | 0.56 | 0.55 | 0.57 | 0.58 |
| 0.24 | 0.19 | 0.26 | 0.20 | 0.32 | 0.32 | 0.24 | 0.30 | 0.23 |
| 0.17 | 0.23 | 0.15 | 0.17 | 0.30 | 0.25 | 0.07 | 0.29 | 0.17 |
| 0.30 | 0.22 | 0.34 | 0.24 | 0.33 | 0.40 | 0.26 | 0.37 | 0.27 |
| 0.35 | 0.18 | 0.33 | 0.21 | 0.32 | 0.33 | 0.27 | 0.32 | 0.16 |
| 0.32 | 0.37 | 0.50 | 0.38 | 0.42 | 0.55 | 0.42 | 0.51 | 0.43 |
| 0.12 | 0.18 | 0.32 | 0.16 | 0.32 | 0.37 | 0.26 | 0.34 | 0.19 |
| 0.31 | 0.27 | 0.42 | 0.35 | 0.35 | 0.40 | 0.42 | 0.40 | 0.35 |

|    |      |      |      |      |      |      |      |      |      |
|----|------|------|------|------|------|------|------|------|------|
| 1  |      |      |      |      |      |      |      |      |      |
| 2  | 0.19 | 0.22 | 0.33 | 0.22 | 0.24 | 0.33 | 0.27 | 0.36 | 0.33 |
| 3  | 0.30 | 0.35 | 0.37 | 0.22 | 0.35 | 0.38 | 0.31 | 0.37 | 0.24 |
| 4  | 0.27 | 0.32 | 0.35 | 0.41 | 0.32 | 0.34 | 0.46 | 0.38 | 0.33 |
| 5  | 0.25 | 0.06 | 0.33 | 0.06 | 0.22 | 0.31 | 0.26 | 0.33 | 0.19 |
| 6  | 0.53 | 0.38 | 0.54 | 0.49 | 0.56 | 0.54 | 0.61 | 0.52 | 0.52 |
| 7  | 0.43 | 0.56 | 0.53 | 0.59 | 0.50 | 0.61 | 0.61 | 0.57 | 0.53 |
| 8  | 0.46 | 0.46 | 0.45 | 0.45 | 0.55 | 0.57 | 0.41 | 0.50 | 0.47 |
| 9  | 0.43 | 0.31 | 0.34 | 0.42 | 0.43 | 0.47 | 0.57 | 0.49 | 0.46 |
| 10 | 0.54 | 0.49 | 0.56 | 0.60 | 0.47 | 0.59 | 0.62 | 0.57 | 0.50 |
| 11 | 0.59 | 0.64 | 0.70 | 0.62 | 0.71 | 0.70 | 0.66 | 0.73 | 0.69 |
| 12 | 0.25 | 0.20 | 0.25 | 0.39 | 0.44 | 0.39 | 0.25 | 0.42 | 0.25 |
| 13 | 0.15 | 0.25 | 0.20 | 0.30 | 0.25 | 0.37 | 0.15 | 0.43 | 0.21 |
| 14 | 0.55 | 0.38 | 0.60 | 0.16 | 0.52 | 0.62 | 0.44 | 0.65 | 0.51 |
| 15 | 0.52 | 0.52 | 0.62 | 0.54 | 0.61 | 0.65 | 0.61 | 0.59 | 0.49 |
| 16 | 0.64 | 0.59 | 0.64 | 0.65 | 0.72 | 0.67 | 0.68 | 0.70 | 0.67 |
| 17 | 0.70 | 0.78 | 0.80 | 0.78 | 0.76 | 0.78 | 0.78 | 0.82 | 0.83 |
| 18 | 0.82 | 0.82 | 0.82 | 0.84 | 0.76 | 0.72 | 0.86 | 0.83 | 0.86 |
| 19 |      |      |      |      |      |      |      |      |      |
| 20 |      |      |      |      |      |      |      |      |      |
| 21 |      |      |      |      |      |      |      |      |      |
| 22 |      |      |      |      |      |      |      |      |      |
| 23 |      |      |      |      |      |      |      |      |      |
| 24 |      |      |      |      |      |      |      |      |      |
| 25 |      |      |      |      |      |      |      |      |      |
| 26 |      |      |      |      |      |      |      |      |      |
| 27 |      |      |      |      |      |      |      |      |      |
| 28 |      |      |      |      |      |      |      |      |      |
| 29 |      |      |      |      |      |      |      |      |      |
| 30 |      |      |      |      |      |      |      |      |      |
| 31 |      |      |      |      |      |      |      |      |      |
| 32 |      |      |      |      |      |      |      |      |      |
| 33 |      |      |      |      |      |      |      |      |      |
| 34 |      |      |      |      |      |      |      |      |      |
| 35 |      |      |      |      |      |      |      |      |      |
| 36 |      |      |      |      |      |      |      |      |      |
| 37 |      |      |      |      |      |      |      |      |      |
| 38 |      |      |      |      |      |      |      |      |      |
| 39 |      |      |      |      |      |      |      |      |      |
| 40 |      |      |      |      |      |      |      |      |      |
| 41 |      |      |      |      |      |      |      |      |      |
| 42 |      |      |      |      |      |      |      |      |      |
| 43 |      |      |      |      |      |      |      |      |      |
| 44 |      |      |      |      |      |      |      |      |      |
| 45 |      |      |      |      |      |      |      |      |      |
| 46 |      |      |      |      |      |      |      |      |      |
| 47 |      |      |      |      |      |      |      |      |      |
| 48 |      |      |      |      |      |      |      |      |      |
| 49 |      |      |      |      |      |      |      |      |      |
| 50 |      |      |      |      |      |      |      |      |      |
| 51 |      |      |      |      |      |      |      |      |      |
| 52 |      |      |      |      |      |      |      |      |      |
| 53 |      |      |      |      |      |      |      |      |      |
| 54 |      |      |      |      |      |      |      |      |      |
| 55 |      |      |      |      |      |      |      |      |      |
| 56 |      |      |      |      |      |      |      |      |      |
| 57 |      |      |      |      |      |      |      |      |      |
| 58 |      |      |      |      |      |      |      |      |      |
| 59 |      |      |      |      |      |      |      |      |      |
| 60 |      |      |      |      |      |      |      |      |      |

1  
2  
3  
4  
5  
6  
7  
8  
9  
10  
11  
12  
13  
14  
15  
16  
17  
18  
19  
20  
21  
22  
23  
24  
25  
26  
27  
28  
29  
30  
31  
32  
33  
34  
35  
36  
37  
38  
39  
40  
41  
42  
43  
44  
45  
46  
47  
48  
49  
50  
51  
52  
53  
54  
55  
56  
57  
58  
59  
60

175 189 192 193 200 210 210 211 216

| RJR  | RC1  | RFF  | RJ2  | RA3  | RBT  | REN  | RRF  | RAP  |
|------|------|------|------|------|------|------|------|------|
| 0.35 | 0.32 | 0.35 | 0.39 | 0.38 | 0.39 | 0.38 | 0.40 | 0.42 |
| 0.31 | 0.34 | 0.35 | 0.38 | 0.36 | 0.38 | 0.39 | 0.37 | 0.41 |
| 0.19 | 0.25 | 0.25 | 0.25 | 0.18 | 0.23 | 0.25 | 0.24 | 0.24 |
| 0.09 | 0.12 | 0.09 | 0.11 | NA   | 0.07 | 0.35 | 0.08 | 0.24 |
| 0.19 | 0.27 | 0.20 | 0.24 | 0.20 | 0.24 | 0.12 | 0.25 | 0.25 |
| 0.36 | 0.36 | 0.36 | 0.40 | 0.42 | 0.41 | 0.43 | 0.40 | 0.46 |
| 0.40 | 0.41 | 0.40 | 0.45 | 0.45 | 0.45 | 0.46 | 0.44 | 0.46 |
| 0.29 | 0.33 | 0.24 | 0.33 | 0.38 | 0.32 | 0.36 | 0.35 | 0.42 |
| 0.29 | 0.33 | 0.32 | 0.36 | 0.38 | 0.31 | 0.36 | 0.29 | 0.36 |
| 0.30 | 0.32 | 0.30 | 0.36 | 0.38 | 0.34 | 0.29 | 0.37 | 0.42 |
| 0.24 | 0.30 | 0.25 | 0.25 | 0.27 | 0.30 | 0.27 | 0.28 | 0.31 |
| 0.09 | 0.12 | 0.04 | 0.09 | 0.06 | 0.08 | 0.29 | 0.04 | 0.19 |
| 0.27 | 0.37 | 0.36 | 0.41 | 0.42 | 0.42 | 0.39 | 0.41 | 0.47 |
| 0.46 | 0.49 | 0.48 | 0.52 | 0.52 | 0.51 | 0.53 | 0.53 | 0.55 |
| 0.18 | 0.31 | 0.24 | 0.30 | 0.24 | 0.23 | 0.23 | 0.26 | 0.34 |
| 0.14 | 0.29 | 0.17 | 0.31 | 0.20 | 0.25 | 0.17 | 0.26 | 0.35 |
| 0.37 | 0.45 | 0.42 | 0.47 | 0.52 | 0.44 | 0.48 | 0.49 | 0.57 |
| 0.25 | 0.27 | 0.29 | 0.41 | 0.39 | 0.26 | 0.37 | 0.31 | 0.49 |
| 0.33 | 0.41 | 0.29 | 0.39 | 0.32 | 0.37 | 0.36 | 0.32 | 0.44 |
| 0.44 | 0.51 | 0.50 | 0.50 | 0.53 | 0.54 | 0.53 | 0.52 | 0.57 |
| 0.47 | 0.51 | 0.47 | 0.52 | 0.49 | 0.46 | 0.53 | 0.49 | 0.56 |
| 0.44 | 0.50 | 0.41 | 0.50 | 0.51 | 0.49 | 0.54 | 0.51 | 0.57 |
| 0.03 | 0.16 | 0.00 | 0.11 | 0.16 | 0.03 | 0.06 | 0.12 | 0.11 |
| 0.24 | 0.38 | 0.24 | 0.37 | 0.29 | 0.37 | 0.34 | 0.29 | 0.45 |
| 0.33 | 0.41 | 0.28 | 0.39 | 0.42 | 0.35 | 0.39 | 0.30 | 0.44 |
| 0.55 | 0.54 | 0.56 | 0.52 | 0.52 | 0.55 | 0.59 | 0.61 | 0.60 |
| 0.60 | 0.61 | 0.59 | 0.63 | 0.63 | 0.60 | 0.62 | 0.63 | 0.65 |
| 0.30 | 0.42 | 0.27 | 0.30 | 0.27 | 0.33 | 0.37 | 0.35 | 0.41 |
| 0.15 | 0.19 | 0.24 | 0.37 | 0.33 | 0.25 | 0.35 | 0.28 | 0.53 |
| 0.24 | 0.45 | 0.36 | 0.46 | 0.40 | 0.45 | 0.42 | 0.40 | 0.53 |
| 0.27 | 0.45 | 0.25 | 0.36 | 0.31 | 0.33 | 0.36 | 0.40 | 0.42 |
| 0.48 | 0.55 | 0.50 | 0.55 | 0.56 | 0.48 | 0.51 | 0.47 | 0.60 |
| 0.19 | 0.24 | 0.29 | 0.38 | 0.39 | 0.31 | 0.27 | 0.41 | 0.36 |
| 0.33 | 0.52 | 0.34 | 0.49 | 0.42 | 0.44 | 0.43 | 0.42 | 0.54 |

|    |      |      |      |      |      |      |      |      |      |
|----|------|------|------|------|------|------|------|------|------|
| 1  |      |      |      |      |      |      |      |      |      |
| 2  | 0.37 | 0.44 | 0.40 | 0.45 | 0.35 | 0.43 | 0.42 | 0.41 | 0.56 |
| 3  | 0.24 | 0.42 | 0.28 | 0.44 | 0.33 | 0.38 | 0.42 | 0.35 | 0.50 |
| 4  | 0.38 | 0.36 | 0.49 | 0.46 | 0.39 | 0.47 | 0.58 | 0.47 | 0.48 |
| 5  | 0.06 | 0.44 | 0.19 | 0.15 | 0.25 | 0.15 | 0.22 | 0.31 | 0.41 |
| 6  | 0.55 | 0.64 | 0.55 | 0.61 | 0.55 | 0.62 | 0.58 | 0.60 | 0.61 |
| 7  | 0.56 | 0.59 | 0.65 | 0.65 | 0.55 | 0.65 | 0.67 | 0.68 | 0.70 |
| 8  | 0.59 | 0.58 | 0.47 | 0.59 | 0.61 | 0.56 | 0.49 | 0.57 | 0.68 |
| 9  | 0.49 | 0.56 | 0.46 | 0.62 | 0.55 | 0.57 | 0.46 | 0.56 | 0.63 |
| 10 | 0.54 | 0.61 | 0.67 | 0.69 | 0.63 | 0.65 | 0.69 | 0.68 | 0.73 |
| 11 | 0.66 | 0.74 | 0.74 | 0.75 | 0.73 | 0.75 | 0.75 | 0.65 | 0.77 |
| 12 | 0.25 | 0.20 | 0.36 | 0.52 | 0.20 | 0.47 | 0.42 | 0.33 | 0.58 |
| 13 | 0.26 | 0.15 | 0.34 | 0.43 | 0.30 | 0.37 | 0.40 | 0.40 | 0.55 |
| 14 | 0.57 | 0.67 | 0.61 | 0.44 | 0.63 | 0.55 | 0.67 | 0.60 | 0.61 |
| 15 | 0.44 | 0.67 | 0.58 | 0.66 | 0.69 | 0.67 | 0.60 | 0.65 | 0.70 |
| 16 | 0.67 | 0.76 | 0.73 | 0.72 | 0.65 | 0.67 | 0.73 | 0.68 | 0.73 |
| 17 | 0.82 | 0.85 | 0.79 | 0.84 | 0.84 | 0.84 | 0.84 | 0.77 | 0.88 |
| 18 | 0.84 | 0.79 | 0.84 | 0.84 | 0.87 | 0.83 | 0.86 | 0.84 | 0.88 |
| 19 |      |      |      |      |      |      |      |      |      |
| 20 |      |      |      |      |      |      |      |      |      |
| 21 |      |      |      |      |      |      |      |      |      |
| 22 |      |      |      |      |      |      |      |      |      |
| 23 |      |      |      |      |      |      |      |      |      |
| 24 |      |      |      |      |      |      |      |      |      |
| 25 |      |      |      |      |      |      |      |      |      |
| 26 |      |      |      |      |      |      |      |      |      |
| 27 |      |      |      |      |      |      |      |      |      |
| 28 |      |      |      |      |      |      |      |      |      |
| 29 |      |      |      |      |      |      |      |      |      |
| 30 |      |      |      |      |      |      |      |      |      |
| 31 |      |      |      |      |      |      |      |      |      |
| 32 |      |      |      |      |      |      |      |      |      |
| 33 |      |      |      |      |      |      |      |      |      |
| 34 |      |      |      |      |      |      |      |      |      |
| 35 |      |      |      |      |      |      |      |      |      |
| 36 |      |      |      |      |      |      |      |      |      |
| 37 |      |      |      |      |      |      |      |      |      |
| 38 |      |      |      |      |      |      |      |      |      |
| 39 |      |      |      |      |      |      |      |      |      |
| 40 |      |      |      |      |      |      |      |      |      |
| 41 |      |      |      |      |      |      |      |      |      |
| 42 |      |      |      |      |      |      |      |      |      |
| 43 |      |      |      |      |      |      |      |      |      |
| 44 |      |      |      |      |      |      |      |      |      |
| 45 |      |      |      |      |      |      |      |      |      |
| 46 |      |      |      |      |      |      |      |      |      |
| 47 |      |      |      |      |      |      |      |      |      |
| 48 |      |      |      |      |      |      |      |      |      |
| 49 |      |      |      |      |      |      |      |      |      |
| 50 |      |      |      |      |      |      |      |      |      |
| 51 |      |      |      |      |      |      |      |      |      |
| 52 |      |      |      |      |      |      |      |      |      |
| 53 |      |      |      |      |      |      |      |      |      |
| 54 |      |      |      |      |      |      |      |      |      |
| 55 |      |      |      |      |      |      |      |      |      |
| 56 |      |      |      |      |      |      |      |      |      |
| 57 |      |      |      |      |      |      |      |      |      |
| 58 |      |      |      |      |      |      |      |      |      |
| 59 |      |      |      |      |      |      |      |      |      |
| 60 |      |      |      |      |      |      |      |      |      |

1  
2  
3  
4  
5  
6  
7  
8  
9  
10  
11  
12  
13  
14  
15  
16  
17  
18  
19  
20  
21  
22  
23  
24  
25  
26  
27  
28  
29  
30  
31  
32  
33  
34  
35  
36  
37  
38  
39  
40  
41  
42  
43  
44  
45  
46  
47  
48  
49  
50  
51  
52  
53  
54  
55  
56  
57  
58  
59  
60

219 221 241 245 250 251 252 252 259

| RMC  | RLQ  | RLT  | RDZ  | RBK  | RQQ  | RBN  | RDD  | RFS  |
|------|------|------|------|------|------|------|------|------|
| 0.33 | 0.37 | 0.40 | 0.35 | 0.41 | 0.43 | 0.37 | 0.44 | 0.46 |
| 0.37 | 0.38 | 0.41 | 0.37 | 0.43 | 0.43 | 0.39 | 0.42 | 0.43 |
| 0.25 | 0.21 | 0.26 | 0.33 | 0.33 | 0.24 | 0.32 | 0.30 | 0.31 |
| 0.12 | 0.14 | 0.18 | 0.15 | 0.15 | 0.10 | 0.03 | 0.11 | 0.13 |
| 0.25 | 0.25 | 0.24 | 0.33 | 0.29 | 0.23 | 0.30 | 0.25 | 0.28 |
| 0.38 | 0.41 | 0.43 | 0.43 | 0.47 | 0.48 | 0.42 | 0.47 | 0.47 |
| 0.42 | 0.45 | 0.49 | 0.47 | 0.51 | 0.50 | 0.45 | 0.50 | 0.49 |
| 0.23 | 0.31 | 0.41 | 0.29 | 0.43 | 0.42 | 0.29 | 0.40 | 0.38 |
| 0.30 | 0.31 | 0.43 | 0.29 | 0.36 | 0.44 | 0.30 | 0.36 | 0.33 |
| 0.21 | 0.32 | 0.35 | 0.36 | 0.42 | 0.41 | 0.37 | 0.41 | 0.42 |
| 0.27 | 0.29 | 0.25 | 0.31 | 0.36 | 0.31 | 0.37 | 0.36 | 0.35 |
| 0.08 | 0.13 | 0.19 | 0.15 | 0.17 | 0.16 | 0.02 | 0.09 | 0.04 |
| 0.38 | 0.34 | 0.44 | 0.45 | 0.51 | 0.44 | 0.41 | 0.46 | 0.45 |
| 0.50 | 0.54 | 0.55 | 0.52 | 0.58 | 0.57 | 0.56 | 0.58 | 0.56 |
| 0.23 | 0.32 | 0.30 | 0.35 | 0.39 | 0.28 | 0.27 | 0.34 | 0.32 |
| 0.25 | 0.31 | 0.33 | 0.28 | 0.37 | 0.22 | 0.30 | 0.36 | 0.31 |
| 0.41 | 0.48 | 0.51 | 0.49 | 0.57 | 0.52 | 0.50 | 0.54 | 0.52 |
| 0.27 | 0.31 | 0.38 | 0.35 | 0.47 | 0.43 | 0.28 | 0.42 | 0.38 |
| 0.38 | 0.39 | 0.43 | 0.48 | 0.50 | 0.40 | 0.51 | 0.47 | 0.47 |
| 0.45 | 0.53 | 0.56 | 0.54 | 0.59 | 0.57 | 0.57 | 0.58 | 0.59 |
| 0.49 | 0.49 | 0.56 | 0.53 | 0.57 | 0.58 | 0.54 | 0.55 | 0.52 |
| 0.45 | 0.51 | 0.50 | 0.48 | 0.58 | 0.56 | 0.54 | 0.57 | 0.55 |
| 0.09 | 0.18 | 0.09 | 0.16 | 0.14 | 0.20 | 0.09 | 0.12 | 0.22 |
| 0.28 | 0.34 | 0.37 | 0.32 | 0.46 | 0.33 | 0.30 | 0.45 | 0.42 |
| 0.33 | 0.35 | 0.42 | 0.37 | 0.48 | 0.43 | 0.38 | 0.44 | 0.39 |
| 0.53 | 0.57 | 0.61 | 0.62 | 0.62 | 0.58 | 0.61 | 0.61 | 0.62 |
| 0.61 | 0.64 | 0.66 | 0.62 | 0.68 | 0.67 | 0.66 | 0.68 | 0.66 |
| 0.32 | 0.32 | 0.36 | 0.43 | 0.50 | 0.35 | 0.41 | 0.32 | 0.43 |
| 0.20 | 0.27 | 0.28 | 0.36 | 0.51 | 0.47 | 0.19 | 0.33 | 0.28 |
| 0.38 | 0.48 | 0.46 | 0.44 | 0.49 | 0.53 | 0.38 | 0.50 | 0.44 |
| 0.31 | 0.34 | 0.35 | 0.36 | 0.45 | 0.39 | 0.41 | 0.44 | 0.44 |
| 0.38 | 0.53 | 0.57 | 0.47 | 0.61 | 0.52 | 0.48 | 0.56 | 0.53 |
| 0.37 | 0.24 | 0.33 | 0.35 | 0.38 | 0.40 | 0.40 | 0.38 | 0.38 |
| 0.48 | 0.47 | 0.51 | 0.40 | 0.56 | 0.52 | 0.45 | 0.56 | 0.54 |

|    |      |      |      |      |      |      |      |      |      |
|----|------|------|------|------|------|------|------|------|------|
| 1  |      |      |      |      |      |      |      |      |      |
| 2  | 0.30 | 0.35 | 0.34 | 0.30 | 0.53 | 0.45 | 0.32 | 0.47 | 0.44 |
| 3  | 0.38 | 0.45 | 0.33 | 0.37 | 0.51 | 0.45 | 0.41 | 0.46 | 0.49 |
| 4  | 0.47 | 0.44 | 0.47 | 0.50 | 0.46 | 0.51 | 0.52 | 0.54 | 0.55 |
| 5  | 0.31 | 0.35 | 0.36 | 0.26 | 0.34 | 0.26 | 0.29 | 0.46 | 0.31 |
| 6  | 0.62 | 0.52 | 0.64 | 0.67 | 0.68 | 0.61 | 0.66 | 0.67 | 0.68 |
| 7  | 0.66 | 0.67 | 0.65 | 0.69 | 0.68 | 0.71 | 0.70 | 0.70 | 0.73 |
| 8  | 0.41 | 0.57 | 0.46 | 0.51 | 0.69 | 0.62 | 0.60 | 0.49 | 0.55 |
| 9  | 0.42 | 0.58 | 0.49 | 0.53 | 0.66 | 0.49 | 0.52 | 0.63 | 0.51 |
| 10 | 0.66 | 0.66 | 0.71 | 0.66 | 0.74 | 0.72 | 0.69 | 0.70 | 0.69 |
| 11 | 0.65 | 0.77 | 0.79 | 0.65 | 0.79 | 0.79 | 0.79 | 0.79 | 0.79 |
| 12 | 0.33 | 0.42 | 0.29 | 0.29 | 0.52 | 0.42 | 0.36 | 0.49 | 0.39 |
| 13 | 0.21 | 0.34 | 0.30 | 0.21 | 0.57 | 0.40 | 0.26 | 0.43 | 0.40 |
| 14 | 0.56 | 0.66 | 0.61 | 0.58 | 0.68 | 0.68 | 0.67 | 0.66 | 0.76 |
| 15 | 0.59 | 0.69 | 0.68 | 0.63 | 0.75 | 0.73 | 0.57 | 0.76 | 0.69 |
| 16 | 0.74 | 0.69 | 0.74 | 0.79 | 0.78 | 0.76 | 0.81 | 0.79 | 0.77 |
| 17 | 0.82 | 0.85 | 0.85 | 0.85 | 0.88 | 0.86 | 0.83 | 0.84 | 0.88 |
| 18 | 0.84 | 0.89 | 0.90 | 0.87 | 0.90 | 0.89 | 0.82 | 0.84 | 0.88 |
| 19 |      |      |      |      |      |      |      |      |      |
| 20 |      |      |      |      |      |      |      |      |      |
| 21 |      |      |      |      |      |      |      |      |      |
| 22 |      |      |      |      |      |      |      |      |      |
| 23 |      |      |      |      |      |      |      |      |      |
| 24 |      |      |      |      |      |      |      |      |      |
| 25 |      |      |      |      |      |      |      |      |      |
| 26 |      |      |      |      |      |      |      |      |      |
| 27 |      |      |      |      |      |      |      |      |      |
| 28 |      |      |      |      |      |      |      |      |      |
| 29 |      |      |      |      |      |      |      |      |      |
| 30 |      |      |      |      |      |      |      |      |      |
| 31 |      |      |      |      |      |      |      |      |      |
| 32 |      |      |      |      |      |      |      |      |      |
| 33 |      |      |      |      |      |      |      |      |      |
| 34 |      |      |      |      |      |      |      |      |      |
| 35 |      |      |      |      |      |      |      |      |      |
| 36 |      |      |      |      |      |      |      |      |      |
| 37 |      |      |      |      |      |      |      |      |      |
| 38 |      |      |      |      |      |      |      |      |      |
| 39 |      |      |      |      |      |      |      |      |      |
| 40 |      |      |      |      |      |      |      |      |      |
| 41 |      |      |      |      |      |      |      |      |      |
| 42 |      |      |      |      |      |      |      |      |      |
| 43 |      |      |      |      |      |      |      |      |      |
| 44 |      |      |      |      |      |      |      |      |      |
| 45 |      |      |      |      |      |      |      |      |      |
| 46 |      |      |      |      |      |      |      |      |      |
| 47 |      |      |      |      |      |      |      |      |      |
| 48 |      |      |      |      |      |      |      |      |      |
| 49 |      |      |      |      |      |      |      |      |      |
| 50 |      |      |      |      |      |      |      |      |      |
| 51 |      |      |      |      |      |      |      |      |      |
| 52 |      |      |      |      |      |      |      |      |      |
| 53 |      |      |      |      |      |      |      |      |      |
| 54 |      |      |      |      |      |      |      |      |      |
| 55 |      |      |      |      |      |      |      |      |      |
| 56 |      |      |      |      |      |      |      |      |      |
| 57 |      |      |      |      |      |      |      |      |      |
| 58 |      |      |      |      |      |      |      |      |      |
| 59 |      |      |      |      |      |      |      |      |      |
| 60 |      |      |      |      |      |      |      |      |      |

1  
2  
3  
4  
5  
6  
7  
8  
9  
10  
11  
12  
13  
14  
15  
16  
17  
18  
19  
20  
21  
22  
23  
24  
25  
26  
27  
28  
29  
30  
31  
32  
33  
34  
35  
36  
37  
38  
39  
40  
41  
42  
43  
44  
45  
46  
47  
48  
49  
50  
51  
52  
53  
54  
55  
56  
57  
58  
59  
60

261 277 277 279 279 287 288 288 294

| RTK  | RCF  | RWG  | REM  | RJF  | RQW  | RCB  | RF4  | RK5  |
|------|------|------|------|------|------|------|------|------|
| 0.46 | 0.45 | 0.44 | 0.46 | 0.45 | 0.44 | 0.44 | 0.44 | 0.50 |
| 0.44 | 0.45 | 0.44 | 0.46 | 0.46 | 0.46 | 0.46 | 0.45 | 0.47 |
| 0.27 | 0.31 | 0.32 | 0.36 | 0.34 | 0.32 | 0.39 | 0.35 | 0.38 |
| 0.08 | 0.14 | 0.12 | 0.22 | 0.14 | 0.14 | 0.14 | 0.32 | 0.12 |
| 0.29 | 0.28 | 0.34 | 0.34 | 0.30 | 0.28 | 0.35 | 0.34 | 0.39 |
| 0.49 | 0.49 | 0.48 | 0.50 | 0.50 | 0.51 | 0.48 | 0.50 | 0.52 |
| 0.51 | 0.51 | 0.50 | 0.54 | 0.53 | 0.52 | 0.52 | 0.54 | 0.53 |
| 0.41 | 0.44 | 0.43 | 0.42 | 0.39 | 0.43 | 0.35 | 0.40 | 0.48 |
| 0.36 | 0.42 | 0.35 | 0.36 | 0.44 | 0.41 | 0.41 | 0.36 | 0.41 |
| 0.43 | 0.41 | 0.43 | 0.38 | 0.43 | 0.43 | 0.37 | 0.44 | 0.49 |
| 0.37 | 0.38 | 0.42 | 0.39 | 0.43 | 0.40 | 0.42 | 0.38 | 0.41 |
| 0.06 | 0.09 | 0.10 | 0.23 | 0.08 | 0.19 | 0.12 | 0.33 | 0.15 |
| 0.47 | 0.51 | 0.48 | 0.47 | 0.51 | 0.47 | 0.46 | 0.51 | 0.57 |
| 0.59 | 0.60 | 0.59 | 0.60 | 0.60 | 0.61 | 0.55 | 0.60 | 0.62 |
| 0.28 | 0.29 | 0.39 | 0.34 | 0.33 | 0.38 | 0.45 | 0.38 | 0.38 |
| 0.30 | 0.39 | 0.35 | 0.38 | 0.34 | 0.35 | 0.40 | 0.39 | 0.35 |
| 0.60 | 0.57 | 0.56 | 0.57 | 0.58 | 0.55 | 0.54 | 0.61 | 0.62 |
| 0.36 | 0.50 | 0.29 | 0.36 | 0.49 | 0.44 | 0.44 | 0.47 | 0.40 |
| 0.46 | 0.52 | 0.51 | 0.52 | 0.49 | 0.51 | 0.57 | 0.55 | 0.50 |
| 0.60 | 0.56 | 0.60 | 0.63 | 0.62 | 0.62 | 0.58 | 0.60 | 0.64 |
| 0.56 | 0.53 | 0.58 | 0.58 | 0.61 | 0.58 | 0.58 | 0.58 | 0.61 |
| 0.55 | 0.58 | 0.53 | 0.60 | 0.56 | 0.61 | 0.57 | 0.61 | 0.61 |
| 0.12 | 0.18 | 0.12 | 0.26 | 0.09 | 0.14 | 0.16 | 0.16 | 0.28 |
| 0.43 | 0.42 | 0.42 | 0.40 | 0.47 | 0.46 | 0.44 | 0.45 | 0.47 |
| 0.43 | 0.43 | 0.50 | 0.38 | 0.49 | 0.43 | 0.34 | 0.55 | 0.54 |
| 0.62 | 0.64 | 0.62 | 0.62 | 0.61 | 0.64 | 0.66 | 0.65 | 0.63 |
| 0.68 | 0.70 | 0.70 | 0.68 | 0.70 | 0.72 | 0.71 | 0.71 | 0.71 |
| 0.39 | 0.48 | 0.48 | 0.50 | 0.43 | 0.45 | 0.52 | 0.48 | 0.50 |
| 0.39 | 0.51 | 0.31 | 0.33 | 0.43 | 0.45 | 0.39 | 0.45 | 0.37 |
| 0.52 | 0.50 | 0.51 | 0.57 | 0.53 | 0.53 | 0.48 | 0.57 | 0.58 |
| 0.43 | 0.43 | 0.46 | 0.49 | 0.49 | 0.46 | 0.48 | 0.49 | 0.55 |
| 0.60 | 0.52 | 0.62 | 0.59 | 0.61 | 0.61 | 0.59 | 0.65 | 0.54 |
| 0.27 | 0.31 | 0.43 | 0.43 | 0.39 | 0.40 | 0.39 | 0.49 | 0.43 |
| 0.48 | 0.46 | 0.59 | 0.51 | 0.52 | 0.63 | 0.56 | 0.60 | 0.58 |

|    |      |      |      |      |      |      |      |      |      |
|----|------|------|------|------|------|------|------|------|------|
| 1  |      |      |      |      |      |      |      |      |      |
| 2  | 0.51 | 0.44 | 0.41 | 0.50 | 0.46 | 0.52 | 0.45 | 0.59 | 0.58 |
| 3  | 0.45 | 0.49 | 0.43 | 0.38 | 0.58 | 0.53 | 0.45 | 0.58 | 0.53 |
| 4  | 0.49 | 0.57 | 0.54 | 0.59 | 0.52 | 0.49 | 0.54 | 0.54 | 0.45 |
| 5  | 0.48 | 0.38 | 0.44 | 0.39 | 0.36 | 0.48 | 0.19 | 0.40 | 0.41 |
| 6  | 0.66 | 0.71 | 0.72 | 0.74 | 0.70 | 0.72 | 0.77 | 0.72 | 0.74 |
| 7  | 0.67 | 0.73 | 0.71 | 0.74 | 0.73 | 0.73 | 0.71 | 0.73 | 0.70 |
| 8  | 0.64 | 0.61 | 0.69 | 0.62 | 0.59 | 0.64 | 0.62 | 0.63 | 0.70 |
| 9  | 0.63 | 0.52 | 0.62 | 0.62 | 0.67 | 0.69 | 0.66 | 0.70 | 0.69 |
| 10 | 0.68 | 0.71 | 0.69 | 0.76 | 0.75 | 0.73 | 0.70 | 0.76 | 0.74 |
| 11 | 0.81 | 0.78 | 0.81 | 0.80 | 0.77 | 0.82 | 0.81 | 0.82 | 0.80 |
| 12 | 0.33 | 0.29 | 0.42 | 0.51 | 0.37 | 0.53 | 0.25 | 0.63 | 0.45 |
| 13 | 0.48 | 0.30 | 0.52 | 0.37 | 0.43 | 0.57 | 0.43 | 0.41 | 0.37 |
| 14 | 0.70 | 0.74 | 0.69 | 0.70 | 0.67 | 0.66 | 0.66 | 0.61 | 0.75 |
| 15 | 0.76 | 0.73 | 0.67 | 0.77 | 0.79 | 0.77 | 0.71 | 0.81 | 0.81 |
| 16 | 0.76 | 0.78 | 0.81 | 0.82 | 0.79 | 0.81 | 0.84 | 0.83 | 0.77 |
| 17 | 0.86 | 0.90 | 0.89 | 0.89 | 0.90 | 0.89 | 0.87 | 0.89 | 0.90 |
| 18 | 0.87 | 0.91 | 0.84 | 0.89 | 0.91 | 0.91 | 0.91 | 0.90 | 0.89 |
| 19 |      |      |      |      |      |      |      |      |      |
| 20 |      |      |      |      |      |      |      |      |      |
| 21 |      |      |      |      |      |      |      |      |      |
| 22 |      |      |      |      |      |      |      |      |      |
| 23 |      |      |      |      |      |      |      |      |      |
| 24 |      |      |      |      |      |      |      |      |      |
| 25 |      |      |      |      |      |      |      |      |      |
| 26 |      |      |      |      |      |      |      |      |      |
| 27 |      |      |      |      |      |      |      |      |      |
| 28 |      |      |      |      |      |      |      |      |      |
| 29 |      |      |      |      |      |      |      |      |      |
| 30 |      |      |      |      |      |      |      |      |      |
| 31 |      |      |      |      |      |      |      |      |      |
| 32 |      |      |      |      |      |      |      |      |      |
| 33 |      |      |      |      |      |      |      |      |      |
| 34 |      |      |      |      |      |      |      |      |      |
| 35 |      |      |      |      |      |      |      |      |      |
| 36 |      |      |      |      |      |      |      |      |      |
| 37 |      |      |      |      |      |      |      |      |      |
| 38 |      |      |      |      |      |      |      |      |      |
| 39 |      |      |      |      |      |      |      |      |      |
| 40 |      |      |      |      |      |      |      |      |      |
| 41 |      |      |      |      |      |      |      |      |      |
| 42 |      |      |      |      |      |      |      |      |      |
| 43 |      |      |      |      |      |      |      |      |      |
| 44 |      |      |      |      |      |      |      |      |      |
| 45 |      |      |      |      |      |      |      |      |      |
| 46 |      |      |      |      |      |      |      |      |      |
| 47 |      |      |      |      |      |      |      |      |      |
| 48 |      |      |      |      |      |      |      |      |      |
| 49 |      |      |      |      |      |      |      |      |      |
| 50 |      |      |      |      |      |      |      |      |      |
| 51 |      |      |      |      |      |      |      |      |      |
| 52 |      |      |      |      |      |      |      |      |      |
| 53 |      |      |      |      |      |      |      |      |      |
| 54 |      |      |      |      |      |      |      |      |      |
| 55 |      |      |      |      |      |      |      |      |      |
| 56 |      |      |      |      |      |      |      |      |      |
| 57 |      |      |      |      |      |      |      |      |      |
| 58 |      |      |      |      |      |      |      |      |      |
| 59 |      |      |      |      |      |      |      |      |      |
| 60 |      |      |      |      |      |      |      |      |      |



1  
2  
3  
4  
5  
6  
7  
8  
9  
10  
11  
12  
13  
14  
15  
16  
17  
18  
19  
20  
21  
22  
23  
24  
25  
26  
27  
28  
29  
30  
31  
32  
33  
34  
35  
36  
37  
38  
39  
40  
41  
42  
43  
44  
45  
46  
47  
48  
49  
50  
51  
52  
53  
54  
55  
56  
57  
58  
59  
60

298 299 308 309 313 313 320 324 327

| RCD  | RBZ  | RTP  | RWJ  | RC9  | RGP  | RD8  | RBD  | RNQ  |
|------|------|------|------|------|------|------|------|------|
| 0.44 | 0.47 | 0.47 | 0.46 | 0.47 | 0.48 | 0.52 | 0.47 | 0.47 |
| 0.45 | 0.46 | 0.47 | 0.47 | 0.48 | 0.48 | 0.49 | 0.49 | 0.50 |
| 0.30 | 0.32 | 0.27 | 0.40 | 0.32 | 0.34 | 0.33 | 0.32 | 0.36 |
| 0.16 | 0.15 | 0.22 | 0.15 | 0.17 | 0.14 | 0.13 | 0.12 | 0.21 |
| 0.27 | 0.32 | 0.34 | 0.35 | 0.31 | 0.32 | 0.35 | 0.31 | 0.28 |
| 0.48 | 0.49 | 0.51 | 0.52 | 0.50 | 0.53 | 0.54 | 0.53 | 0.52 |
| 0.52 | 0.54 | 0.55 | 0.54 | 0.55 | 0.55 | 0.57 | 0.55 | 0.57 |
| 0.35 | 0.42 | 0.48 | 0.46 | 0.40 | 0.48 | 0.48 | 0.44 | 0.43 |
| 0.38 | 0.47 | 0.39 | 0.48 | 0.43 | 0.47 | 0.43 | 0.45 | 0.42 |
| 0.40 | 0.46 | 0.42 | 0.46 | 0.42 | 0.48 | 0.49 | 0.46 | 0.45 |
| 0.28 | 0.39 | 0.36 | 0.43 | 0.38 | 0.39 | 0.39 | 0.35 | 0.38 |
| 0.16 | 0.16 | 0.14 | 0.12 | 0.09 | 0.15 | 0.13 | 0.13 | 0.22 |
| 0.44 | 0.46 | 0.53 | 0.49 | 0.48 | 0.52 | 0.57 | 0.46 | 0.54 |
| 0.56 | 0.60 | 0.63 | 0.62 | 0.62 | 0.62 | 0.64 | 0.62 | 0.63 |
| 0.30 | 0.31 | 0.30 | 0.49 | 0.35 | 0.35 | 0.36 | 0.36 | 0.36 |
| 0.32 | 0.26 | 0.19 | 0.41 | 0.35 | 0.35 | 0.39 | 0.29 | 0.29 |
| 0.51 | 0.56 | 0.58 | 0.61 | 0.57 | 0.60 | 0.63 | 0.58 | 0.63 |
| 0.38 | 0.50 | 0.47 | 0.25 | 0.45 | 0.48 | 0.57 | 0.44 | 0.51 |
| 0.48 | 0.43 | 0.49 | 0.57 | 0.51 | 0.49 | 0.54 | 0.43 | 0.53 |
| 0.47 | 0.58 | 0.61 | 0.60 | 0.64 | 0.63 | 0.67 | 0.64 | 0.63 |
| 0.60 | 0.62 | 0.61 | 0.61 | 0.61 | 0.61 | 0.64 | 0.62 | 0.62 |
| 0.50 | 0.56 | 0.61 | 0.56 | 0.60 | 0.59 | 0.64 | 0.60 | 0.64 |
| 0.06 | 0.18 | 0.16 | 0.22 | 0.18 | 0.14 | 0.33 | 0.14 | 0.14 |
| 0.39 | 0.42 | 0.40 | 0.52 | 0.43 | 0.47 | 0.47 | 0.44 | 0.44 |
| 0.38 | 0.38 | 0.51 | 0.41 | 0.52 | 0.53 | 0.51 | 0.44 | 0.58 |
| 0.66 | 0.62 | 0.64 | 0.65 | 0.69 | 0.66 | 0.64 | 0.66 | 0.66 |
| 0.69 | 0.69 | 0.72 | 0.72 | 0.73 | 0.72 | 0.74 | 0.73 | 0.74 |
| 0.41 | 0.39 | 0.42 | 0.50 | 0.46 | 0.43 | 0.46 | 0.41 | 0.43 |
| 0.31 | 0.46 | 0.40 | 0.25 | 0.32 | 0.48 | 0.54 | 0.41 | 0.43 |
| 0.34 | 0.52 | 0.56 | 0.56 | 0.52 | 0.57 | 0.59 | 0.54 | 0.59 |
| 0.33 | 0.47 | 0.36 | 0.50 | 0.45 | 0.53 | 0.52 | 0.47 | 0.47 |
| 0.53 | 0.59 | 0.65 | 0.59 | 0.64 | 0.65 | 0.66 | 0.65 | 0.68 |
| 0.33 | 0.19 | 0.39 | 0.33 | 0.35 | 0.46 | 0.47 | 0.22 | 0.43 |
| 0.47 | 0.59 | 0.47 | 0.63 | 0.60 | 0.62 | 0.61 | 0.54 | 0.61 |

|    |      |      |      |      |      |      |      |      |      |
|----|------|------|------|------|------|------|------|------|------|
| 1  |      |      |      |      |      |      |      |      |      |
| 2  | 0.46 | 0.49 | 0.61 | 0.52 | 0.60 | 0.47 | 0.56 | 0.48 | 0.61 |
| 3  | 0.33 | 0.45 | 0.44 | 0.47 | 0.49 | 0.49 | 0.64 | 0.57 | 0.54 |
| 4  | 0.53 | 0.55 | 0.49 | 0.60 | 0.63 | 0.55 | 0.52 | 0.58 | 0.53 |
| 5  | 0.26 | 0.32 | 0.31 | 0.46 | 0.40 | 0.36 | 0.45 | 0.19 | 0.47 |
| 6  | 0.66 | 0.70 | 0.66 | 0.76 | 0.71 | 0.73 | 0.73 | 0.69 | 0.73 |
| 7  | 0.71 | 0.70 | 0.73 | 0.75 | 0.75 | 0.74 | 0.70 | 0.75 | 0.73 |
| 8  | 0.34 | 0.51 | 0.73 | 0.67 | 0.64 | 0.60 | 0.73 | 0.69 | 0.77 |
| 9  | 0.56 | 0.45 | 0.73 | 0.70 | 0.70 | 0.52 | 0.72 | 0.62 | 0.76 |
| 10 | 0.59 | 0.71 | 0.72 | 0.71 | 0.74 | 0.77 | 0.76 | 0.76 | 0.76 |
| 11 | 0.80 | 0.80 | 0.73 | 0.84 | 0.81 | 0.83 | 0.83 | 0.82 | 0.83 |
| 12 | 0.37 | 0.37 | 0.40 | 0.53 | 0.49 | 0.54 | 0.51 | 0.59 | 0.60 |
| 13 | 0.15 | 0.37 | 0.48 | 0.48 | 0.60 | 0.52 | 0.50 | 0.43 | 0.69 |
| 14 | 0.47 | 0.67 | 0.68 | 0.66 | 0.45 | 0.74 | 0.79 | 0.70 | 0.74 |
| 15 | 0.63 | 0.75 | 0.65 | 0.78 | 0.75 | 0.75 | 0.81 | 0.70 | 0.84 |
| 16 | 0.72 | 0.70 | 0.80 | 0.85 | 0.82 | 0.81 | 0.82 | 0.78 | 0.79 |
| 17 | 0.84 | 0.89 | 0.90 | 0.88 | 0.90 | 0.88 | 0.90 | 0.88 | 0.91 |
| 18 | 0.91 | 0.91 | 0.91 | 0.88 | 0.91 | 0.85 | 0.92 | 0.91 | 0.89 |
| 19 |      |      |      |      |      |      |      |      |      |
| 20 |      |      |      |      |      |      |      |      |      |
| 21 |      |      |      |      |      |      |      |      |      |
| 22 |      |      |      |      |      |      |      |      |      |
| 23 |      |      |      |      |      |      |      |      |      |
| 24 |      |      |      |      |      |      |      |      |      |
| 25 |      |      |      |      |      |      |      |      |      |
| 26 |      |      |      |      |      |      |      |      |      |
| 27 |      |      |      |      |      |      |      |      |      |
| 28 |      |      |      |      |      |      |      |      |      |
| 29 |      |      |      |      |      |      |      |      |      |
| 30 |      |      |      |      |      |      |      |      |      |
| 31 |      |      |      |      |      |      |      |      |      |
| 32 |      |      |      |      |      |      |      |      |      |
| 33 |      |      |      |      |      |      |      |      |      |
| 34 |      |      |      |      |      |      |      |      |      |
| 35 |      |      |      |      |      |      |      |      |      |
| 36 |      |      |      |      |      |      |      |      |      |
| 37 |      |      |      |      |      |      |      |      |      |
| 38 |      |      |      |      |      |      |      |      |      |
| 39 |      |      |      |      |      |      |      |      |      |
| 40 |      |      |      |      |      |      |      |      |      |
| 41 |      |      |      |      |      |      |      |      |      |
| 42 |      |      |      |      |      |      |      |      |      |
| 43 |      |      |      |      |      |      |      |      |      |
| 44 |      |      |      |      |      |      |      |      |      |
| 45 |      |      |      |      |      |      |      |      |      |
| 46 |      |      |      |      |      |      |      |      |      |
| 47 |      |      |      |      |      |      |      |      |      |
| 48 |      |      |      |      |      |      |      |      |      |
| 49 |      |      |      |      |      |      |      |      |      |
| 50 |      |      |      |      |      |      |      |      |      |
| 51 |      |      |      |      |      |      |      |      |      |
| 52 |      |      |      |      |      |      |      |      |      |
| 53 |      |      |      |      |      |      |      |      |      |
| 54 |      |      |      |      |      |      |      |      |      |
| 55 |      |      |      |      |      |      |      |      |      |
| 56 |      |      |      |      |      |      |      |      |      |
| 57 |      |      |      |      |      |      |      |      |      |
| 58 |      |      |      |      |      |      |      |      |      |
| 59 |      |      |      |      |      |      |      |      |      |
| 60 |      |      |      |      |      |      |      |      |      |

1  
2  
3  
4  
5  
6  
7  
8  
9  
10  
11  
12  
13  
14  
15  
16  
17  
18  
19  
20  
21  
22  
23  
24  
25  
26  
27  
28  
29  
30  
31  
32  
33  
34  
35  
36  
37  
38  
39  
40  
41  
42  
43  
44  
45  
46  
47  
48  
49  
50  
51  
52  
53  
54  
55  
56  
57  
58  
59  
60

344 350 350 352 374 384 387 395 396

| RP5  | RVJ  | RW3  | RJC  | RAE  | RBL  | RGR  | RQ6  | R1K  |
|------|------|------|------|------|------|------|------|------|
| 0.50 | 0.46 | 0.53 | 0.47 | 0.54 | 0.52 | 0.53 | 0.55 | 0.54 |
| 0.51 | 0.52 | 0.52 | 0.50 | 0.53 | 0.51 | 0.52 | 0.54 | 0.53 |
| 0.37 | 0.41 | 0.41 | 0.33 | 0.44 | 0.40 | 0.37 | 0.41 | 0.40 |
| 0.15 | 0.25 | 0.13 | 0.19 | 0.17 | 0.24 | 0.20 | 0.26 | 0.19 |
| 0.33 | 0.47 | 0.35 | 0.26 | 0.44 | 0.36 | 0.32 | 0.31 | 0.40 |
| 0.56 | 0.55 | 0.53 | 0.52 | 0.58 | 0.55 | 0.56 | 0.55 | 0.59 |
| 0.57 | 0.58 | 0.56 | 0.59 | 0.60 | 0.58 | 0.60 | 0.61 | 0.61 |
| 0.46 | 0.44 | 0.45 | 0.46 | 0.52 | 0.49 | 0.51 | 0.47 | 0.47 |
| 0.47 | 0.47 | 0.52 | 0.43 | 0.47 | 0.48 | 0.45 | 0.52 | 0.53 |
| 0.49 | 0.47 | 0.45 | 0.45 | 0.49 | 0.50 | 0.45 | 0.48 | 0.54 |
| 0.43 | 0.45 | 0.43 | 0.32 | 0.52 | 0.43 | 0.42 | 0.43 | 0.45 |
| 0.16 | 0.24 | 0.11 | 0.17 | 0.11 | 0.22 | 0.16 | 0.24 | 0.16 |
| 0.55 | 0.54 | 0.50 | 0.49 | 0.59 | 0.52 | 0.54 | 0.47 | 0.58 |
| 0.65 | 0.66 | 0.64 | 0.65 | 0.68 | 0.66 | 0.67 | 0.66 | 0.67 |
| 0.41 | 0.28 | 0.42 | 0.35 | 0.56 | 0.44 | 0.41 | 0.41 | 0.43 |
| 0.43 | 0.42 | 0.47 | 0.25 | 0.52 | 0.38 | 0.33 | 0.39 | 0.39 |
| 0.64 | 0.57 | 0.59 | 0.60 | 0.67 | 0.64 | 0.62 | 0.63 | 0.68 |
| 0.43 | 0.32 | 0.40 | 0.53 | 0.50 | 0.42 | 0.53 | 0.35 | 0.54 |
| 0.54 | 0.57 | 0.60 | 0.48 | 0.63 | 0.56 | 0.52 | 0.54 | 0.54 |
| 0.66 | 0.65 | 0.65 | 0.64 | 0.70 | 0.68 | 0.67 | 0.69 | 0.68 |
| 0.63 | 0.65 | 0.64 | 0.59 | 0.65 | 0.65 | 0.65 | 0.65 | 0.67 |
| 0.62 | 0.62 | 0.62 | 0.63 | 0.68 | 0.66 | 0.66 | 0.65 | 0.67 |
| 0.16 | 0.28 | 0.12 | 0.18 | 0.31 | 0.16 | 0.28 | 0.16 | 0.29 |
| 0.54 | 0.51 | 0.54 | 0.43 | 0.62 | 0.47 | 0.41 | 0.38 | 0.50 |
| 0.53 | 0.59 | 0.49 | 0.48 | 0.52 | 0.59 | 0.58 | 0.54 | 0.59 |
| 0.67 | 0.71 | 0.69 | 0.70 | 0.70 | 0.70 | 0.71 | 0.73 | 0.71 |
| 0.75 | 0.74 | 0.75 | 0.73 | 0.77 | 0.75 | 0.74 | 0.76 | 0.77 |
| 0.50 | 0.54 | 0.52 | 0.26 | 0.61 | 0.54 | 0.40 | 0.42 | 0.50 |
| 0.48 | 0.32 | 0.34 | 0.46 | 0.48 | 0.43 | 0.51 | 0.32 | 0.54 |
| 0.57 | 0.51 | 0.57 | 0.49 | 0.64 | 0.54 | 0.58 | 0.55 | 0.60 |
| 0.53 | 0.43 | 0.59 | 0.50 | 0.60 | 0.53 | 0.44 | 0.44 | 0.58 |
| 0.68 | 0.68 | 0.67 | 0.66 | 0.67 | 0.67 | 0.67 | 0.70 | 0.73 |
| 0.48 | 0.52 | 0.42 | 0.27 | 0.53 | 0.46 | 0.46 | 0.42 | 0.57 |
| 0.59 | 0.57 | 0.67 | 0.53 | 0.71 | 0.59 | 0.55 | 0.59 | 0.67 |

|    |      |      |      |      |      |      |      |      |      |
|----|------|------|------|------|------|------|------|------|------|
| 1  |      |      |      |      |      |      |      |      |      |
| 2  | 0.62 | 0.53 | 0.56 | 0.41 | 0.63 | 0.53 | 0.54 | 0.57 | 0.63 |
| 3  | 0.57 | 0.61 | 0.55 | 0.52 | 0.59 | 0.59 | 0.58 | 0.56 | 0.62 |
| 4  | 0.61 | 0.60 | 0.62 | 0.53 | 0.64 | 0.60 | 0.57 | 0.65 | 0.67 |
| 5  | 0.49 | 0.51 | 0.51 | 0.44 | 0.50 | 0.48 | 0.43 | 0.37 | 0.46 |
| 6  | 0.76 | 0.76 | 0.77 | 0.70 | 0.80 | 0.75 | 0.73 | 0.73 | 0.74 |
| 7  | 0.79 | 0.73 | 0.78 | 0.71 | 0.79 | 0.76 | 0.74 | 0.78 | 0.79 |
| 8  | 0.77 | 0.76 | 0.71 | 0.60 | 0.76 | 0.71 | 0.66 | 0.57 | 0.76 |
| 9  | 0.75 | 0.74 | 0.71 | 0.45 | 0.71 | 0.67 | 0.72 | 0.72 | 0.74 |
| 10 | 0.78 | 0.74 | 0.78 | 0.74 | 0.81 | 0.77 | 0.76 | 0.81 | 0.81 |
| 11 | 0.83 | 0.85 | 0.83 | 0.85 | 0.82 | 0.79 | 0.86 | 0.86 | 0.85 |
| 12 | 0.63 | 0.51 | 0.59 | 0.47 | 0.58 | 0.53 | 0.47 | 0.33 | 0.55 |
| 13 | 0.58 | 0.57 | 0.48 | 0.46 | 0.60 | 0.59 | 0.34 | 0.46 | 0.50 |
| 14 | 0.75 | 0.64 | 0.68 | 0.77 | 0.82 | 0.75 | 0.80 | 0.74 | 0.77 |
| 15 | 0.75 | 0.73 | 0.79 | 0.70 | 0.82 | 0.78 | 0.80 | 0.78 | 0.83 |
| 16 | 0.80 | 0.84 | 0.84 | 0.78 | 0.86 | 0.84 | 0.84 | 0.83 | 0.85 |
| 17 | 0.90 | 0.89 | 0.91 | 0.83 | 0.92 | 0.90 | 0.92 | 0.91 | 0.92 |
| 18 | 0.90 | 0.93 | 0.93 | 0.92 | 0.93 | 0.92 | 0.93 | 0.94 | 0.93 |
| 19 |      |      |      |      |      |      |      |      |      |
| 20 |      |      |      |      |      |      |      |      |      |
| 21 |      |      |      |      |      |      |      |      |      |
| 22 |      |      |      |      |      |      |      |      |      |
| 23 |      |      |      |      |      |      |      |      |      |
| 24 |      |      |      |      |      |      |      |      |      |
| 25 |      |      |      |      |      |      |      |      |      |
| 26 |      |      |      |      |      |      |      |      |      |
| 27 |      |      |      |      |      |      |      |      |      |
| 28 |      |      |      |      |      |      |      |      |      |
| 29 |      |      |      |      |      |      |      |      |      |
| 30 |      |      |      |      |      |      |      |      |      |
| 31 |      |      |      |      |      |      |      |      |      |
| 32 |      |      |      |      |      |      |      |      |      |
| 33 |      |      |      |      |      |      |      |      |      |
| 34 |      |      |      |      |      |      |      |      |      |
| 35 |      |      |      |      |      |      |      |      |      |
| 36 |      |      |      |      |      |      |      |      |      |
| 37 |      |      |      |      |      |      |      |      |      |
| 38 |      |      |      |      |      |      |      |      |      |
| 39 |      |      |      |      |      |      |      |      |      |
| 40 |      |      |      |      |      |      |      |      |      |
| 41 |      |      |      |      |      |      |      |      |      |
| 42 |      |      |      |      |      |      |      |      |      |
| 43 |      |      |      |      |      |      |      |      |      |
| 44 |      |      |      |      |      |      |      |      |      |
| 45 |      |      |      |      |      |      |      |      |      |
| 46 |      |      |      |      |      |      |      |      |      |
| 47 |      |      |      |      |      |      |      |      |      |
| 48 |      |      |      |      |      |      |      |      |      |
| 49 |      |      |      |      |      |      |      |      |      |
| 50 |      |      |      |      |      |      |      |      |      |
| 51 |      |      |      |      |      |      |      |      |      |
| 52 |      |      |      |      |      |      |      |      |      |
| 53 |      |      |      |      |      |      |      |      |      |
| 54 |      |      |      |      |      |      |      |      |      |
| 55 |      |      |      |      |      |      |      |      |      |
| 56 |      |      |      |      |      |      |      |      |      |
| 57 |      |      |      |      |      |      |      |      |      |
| 58 |      |      |      |      |      |      |      |      |      |
| 59 |      |      |      |      |      |      |      |      |      |
| 60 |      |      |      |      |      |      |      |      |      |

1  
2  
3  
4  
5  
6  
7  
8  
9  
10  
11  
12  
13  
14  
15  
16  
17  
18  
19  
20  
21  
22  
23  
24  
25  
26  
27  
28  
29  
30  
31  
32  
33  
34  
35  
36  
37  
38  
39  
40  
41  
42  
43  
44  
45  
46  
47  
48  
49  
50  
51  
52  
53  
54  
55  
56  
57  
58  
59  
60

397 404 409 412 415 423 430 430 437

| RN7  | RHW  | RNL  | RCX  | RPA  | RWH  | RM2  | RR7  | RNS  |
|------|------|------|------|------|------|------|------|------|
| 0.52 | 0.53 | 0.56 | 0.52 | 0.55 | 0.56 | 0.51 | 0.55 | 0.58 |
| 0.53 | 0.54 | 0.55 | 0.54 | 0.57 | 0.56 | 0.56 | 0.56 | 0.56 |
| 0.38 | 0.42 | 0.39 | 0.42 | 0.42 | 0.46 | 0.49 | 0.41 | 0.45 |
| 0.18 | 0.43 | 0.28 | 0.17 | 0.22 | 0.34 | 0.22 | 0.28 | 0.30 |
| 0.33 | 0.38 | 0.38 | 0.33 | 0.41 | 0.41 | 0.40 | 0.36 | 0.41 |
| 0.52 | 0.54 | 0.59 | 0.57 | 0.57 | 0.60 | 0.56 | 0.53 | 0.57 |
| 0.60 | 0.62 | 0.62 | 0.60 | 0.63 | 0.63 | 0.61 | 0.62 | 0.64 |
| 0.48 | 0.54 | 0.50 | 0.43 | 0.52 | 0.56 | 0.49 | 0.45 | 0.54 |
| 0.49 | 0.45 | 0.48 | 0.52 | 0.52 | 0.55 | 0.43 | 0.43 | 0.54 |
| 0.45 | 0.52 | 0.58 | 0.50 | 0.51 | 0.55 | 0.45 | 0.44 | 0.53 |
| 0.42 | 0.50 | 0.45 | 0.40 | 0.50 | 0.51 | 0.52 | 0.42 | 0.53 |
| 0.11 | 0.40 | 0.31 | 0.18 | 0.22 | 0.36 | 0.20 | 0.18 | 0.30 |
| 0.54 | 0.61 | 0.60 | 0.58 | 0.60 | 0.62 | 0.54 | 0.54 | 0.62 |
| 0.63 | 0.69 | 0.70 | 0.67 | 0.70 | 0.70 | 0.68 | 0.63 | 0.69 |
| 0.47 | 0.43 | 0.46 | 0.48 | 0.51 | 0.52 | 0.54 | 0.37 | 0.51 |
| 0.35 | 0.35 | 0.38 | 0.45 | 0.55 | 0.45 | 0.49 | 0.32 | 0.47 |
| 0.56 | 0.66 | 0.68 | 0.63 | 0.67 | 0.68 | 0.64 | 0.60 | 0.66 |
| 0.50 | 0.51 | 0.58 | 0.53 | 0.55 | 0.55 | 0.43 | 0.50 | 0.62 |
| 0.55 | 0.59 | 0.49 | 0.57 | 0.62 | 0.62 | 0.67 | 0.50 | 0.62 |
| 0.64 | 0.68 | 0.71 | 0.66 | 0.68 | 0.72 | 0.70 | 0.68 | 0.69 |
| 0.67 | 0.68 | 0.69 | 0.62 | 0.68 | 0.70 | 0.70 | 0.71 | 0.70 |
| 0.63 | 0.69 | 0.71 | 0.65 | 0.69 | 0.70 | 0.64 | 0.63 | 0.69 |
| 0.18 | 0.21 | 0.27 | 0.28 | 0.16 | 0.24 | 0.21 | 0.12 | 0.33 |
| 0.47 | 0.58 | 0.56 | 0.53 | 0.59 | 0.54 | 0.52 | 0.44 | 0.58 |
| 0.56 | 0.60 | 0.59 | 0.56 | 0.62 | 0.65 | 0.54 | 0.46 | 0.64 |
| 0.72 | 0.69 | 0.73 | 0.72 | 0.71 | 0.71 | 0.72 | 0.74 | 0.72 |
| 0.76 | 0.78 | 0.78 | 0.76 | 0.78 | 0.79 | 0.78 | 0.76 | 0.79 |
| 0.47 | 0.46 | 0.42 | 0.52 | 0.55 | 0.60 | 0.58 | 0.48 | 0.55 |
| 0.41 | 0.45 | 0.60 | 0.50 | 0.54 | 0.54 | 0.36 | 0.44 | 0.57 |
| 0.51 | 0.61 | 0.65 | 0.59 | 0.63 | 0.63 | 0.63 | 0.58 | 0.65 |
| 0.46 | 0.48 | 0.55 | 0.52 | 0.58 | 0.65 | 0.61 | 0.45 | 0.64 |
| 0.72 | 0.72 | 0.68 | 0.69 | 0.72 | 0.74 | 0.64 | 0.58 | 0.73 |
| 0.40 | 0.62 | 0.48 | 0.47 | 0.58 | 0.58 | 0.47 | 0.29 | 0.57 |
| 0.58 | 0.62 | 0.54 | 0.62 | 0.69 | 0.69 | 0.68 | 0.60 | 0.70 |

|    |      |      |      |      |      |      |      |      |      |
|----|------|------|------|------|------|------|------|------|------|
| 1  |      |      |      |      |      |      |      |      |      |
| 2  | 0.56 | 0.62 | 0.62 | 0.55 | 0.63 | 0.62 | 0.61 | 0.53 | 0.63 |
| 3  | 0.47 | 0.62 | 0.61 | 0.55 | 0.53 | 0.61 | 0.66 | 0.60 | 0.59 |
| 4  | 0.61 | 0.64 | 0.60 | 0.59 | 0.60 | 0.64 | 0.69 | 0.64 | 0.67 |
| 5  | 0.34 | 0.39 | 0.46 | 0.47 | 0.54 | 0.60 | 0.54 | 0.29 | 0.46 |
| 6  | 0.74 | 0.76 | 0.76 | 0.76 | 0.80 | 0.79 | 0.83 | 0.72 | 0.79 |
| 7  | 0.78 | 0.79 | 0.77 | 0.79 | 0.79 | 0.78 | 0.81 | 0.78 | 0.82 |
| 8  | 0.69 | 0.79 | 0.83 | 0.76 | 0.73 | 0.79 | 0.76 | 0.67 | 0.78 |
| 9  | 0.70 | 0.77 | 0.76 | 0.67 | 0.74 | 0.77 | 0.71 | 0.67 | 0.77 |
| 10 | 0.78 | 0.77 | 0.80 | 0.80 | 0.80 | 0.81 | 0.82 | 0.80 | 0.80 |
| 11 | 0.84 | 0.85 | 0.85 | 0.85 | 0.87 | 0.87 | 0.86 | 0.82 | 0.85 |
| 12 | 0.56 | 0.64 | 0.51 | 0.62 | 0.57 | 0.53 | 0.65 | 0.45 | 0.64 |
| 13 | 0.68 | 0.57 | 0.73 | 0.52 | 0.56 | 0.65 | 0.51 | 0.54 | 0.70 |
| 14 | 0.74 | 0.62 | 0.82 | 0.81 | 0.77 | 0.81 | 0.74 | 0.66 | 0.72 |
| 15 | 0.77 | 0.82 | 0.85 | 0.80 | 0.83 | 0.78 | 0.79 | 0.81 | 0.83 |
| 16 | 0.84 | 0.87 | 0.80 | 0.83 | 0.88 | 0.88 | 0.89 | 0.85 | 0.86 |
| 17 | 0.90 | 0.92 | 0.92 | 0.91 | 0.92 | 0.93 | 0.92 | 0.91 | 0.93 |
| 18 | 0.93 | 0.91 | 0.91 | 0.93 | 0.93 | 0.93 | 0.95 | 0.92 | 0.93 |
| 19 |      |      |      |      |      |      |      |      |      |
| 20 |      |      |      |      |      |      |      |      |      |
| 21 |      |      |      |      |      |      |      |      |      |
| 22 |      |      |      |      |      |      |      |      |      |
| 23 |      |      |      |      |      |      |      |      |      |
| 24 |      |      |      |      |      |      |      |      |      |
| 25 |      |      |      |      |      |      |      |      |      |
| 26 |      |      |      |      |      |      |      |      |      |
| 27 |      |      |      |      |      |      |      |      |      |
| 28 |      |      |      |      |      |      |      |      |      |
| 29 |      |      |      |      |      |      |      |      |      |
| 30 |      |      |      |      |      |      |      |      |      |
| 31 |      |      |      |      |      |      |      |      |      |
| 32 |      |      |      |      |      |      |      |      |      |
| 33 |      |      |      |      |      |      |      |      |      |
| 34 |      |      |      |      |      |      |      |      |      |
| 35 |      |      |      |      |      |      |      |      |      |
| 36 |      |      |      |      |      |      |      |      |      |
| 37 |      |      |      |      |      |      |      |      |      |
| 38 |      |      |      |      |      |      |      |      |      |
| 39 |      |      |      |      |      |      |      |      |      |
| 40 |      |      |      |      |      |      |      |      |      |
| 41 |      |      |      |      |      |      |      |      |      |
| 42 |      |      |      |      |      |      |      |      |      |
| 43 |      |      |      |      |      |      |      |      |      |
| 44 |      |      |      |      |      |      |      |      |      |
| 45 |      |      |      |      |      |      |      |      |      |
| 46 |      |      |      |      |      |      |      |      |      |
| 47 |      |      |      |      |      |      |      |      |      |
| 48 |      |      |      |      |      |      |      |      |      |
| 49 |      |      |      |      |      |      |      |      |      |
| 50 |      |      |      |      |      |      |      |      |      |
| 51 |      |      |      |      |      |      |      |      |      |
| 52 |      |      |      |      |      |      |      |      |      |
| 53 |      |      |      |      |      |      |      |      |      |
| 54 |      |      |      |      |      |      |      |      |      |
| 55 |      |      |      |      |      |      |      |      |      |
| 56 |      |      |      |      |      |      |      |      |      |
| 57 |      |      |      |      |      |      |      |      |      |
| 58 |      |      |      |      |      |      |      |      |      |
| 59 |      |      |      |      |      |      |      |      |      |
| 60 |      |      |      |      |      |      |      |      |      |

1  
2  
3  
4  
5  
6  
7  
8  
9  
10  
11  
12  
13  
14  
15  
16  
17  
18  
19  
20  
21  
22  
23  
24  
25  
26  
27  
28  
29  
30  
31  
32  
33  
34  
35  
36  
37  
38  
39  
40  
41  
42  
43  
44  
45  
46  
47  
48  
49  
50  
51  
52  
53  
54  
55  
56  
57  
58  
59  
60

438 439 443 448 451 467 470 484 496

| RN3  | RGN  | RVW  | RNZ  | RDE  | RLN  | RWY  | RGQ  | RXP  |
|------|------|------|------|------|------|------|------|------|
| 0.55 | 0.54 | 0.54 | 0.55 | 0.55 | 0.58 | 0.58 | 0.61 | 0.59 |
| 0.58 | 0.55 | 0.57 | 0.55 | 0.57 | 0.59 | 0.57 | 0.58 | 0.60 |
| 0.44 | 0.44 | 0.45 | 0.40 | 0.44 | 0.42 | 0.41 | 0.43 | 0.46 |
| 0.22 | 0.26 | 0.24 | 0.20 | 0.28 | 0.22 | 0.23 | 0.32 | 0.21 |
| 0.40 | 0.38 | 0.36 | 0.38 | 0.36 | 0.36 | 0.43 | 0.37 | 0.41 |
| 0.58 | 0.57 | 0.55 | 0.60 | 0.57 | 0.59 | 0.60 | 0.63 | 0.63 |
| 0.64 | 0.61 | 0.62 | 0.63 | 0.64 | 0.64 | 0.66 | 0.65 | 0.66 |
| 0.51 | 0.50 | 0.47 | 0.55 | 0.51 | 0.54 | 0.55 | 0.57 | 0.59 |
| 0.49 | 0.51 | 0.50 | 0.51 | 0.53 | 0.58 | 0.53 | 0.55 | 0.56 |
| 0.53 | 0.51 | 0.47 | 0.49 | 0.54 | 0.55 | 0.54 | 0.53 | 0.58 |
| 0.51 | 0.49 | 0.45 | 0.42 | 0.48 | 0.46 | 0.48 | 0.47 | 0.50 |
| 0.22 | 0.21 | 0.18 | 0.16 | 0.21 | 0.19 | 0.16 | 0.22 | 0.25 |
| 0.59 | 0.58 | 0.55 | 0.54 | 0.59 | 0.61 | 0.62 | 0.58 | 0.60 |
| 0.70 | 0.68 | 0.66 | 0.70 | 0.68 | 0.68 | 0.72 | 0.71 | 0.73 |
| 0.47 | 0.36 | 0.45 | 0.44 | 0.41 | 0.49 | 0.50 | 0.43 | 0.49 |
| 0.46 | 0.41 | 0.46 | 0.40 | 0.42 | 0.41 | 0.43 | 0.41 | 0.48 |
| 0.64 | 0.64 | 0.59 | 0.65 | 0.66 | 0.68 | 0.69 | 0.68 | 0.71 |
| 0.63 | 0.53 | 0.58 | 0.51 | 0.57 | 0.53 | 0.60 | 0.60 | 0.61 |
| 0.64 | 0.57 | 0.60 | 0.56 | 0.61 | 0.57 | 0.60 | 0.61 | 0.63 |
| 0.67 | 0.68 | 0.69 | 0.70 | 0.67 | 0.73 | 0.71 | 0.74 | 0.74 |
| 0.69 | 0.67 | 0.68 | 0.67 | 0.70 | 0.72 | 0.69 | 0.69 | 0.72 |
| 0.70 | 0.70 | 0.65 | 0.63 | 0.67 | 0.68 | 0.69 | 0.68 | 0.71 |
| 0.21 | 0.21 | 0.21 | 0.19 | 0.23 | 0.29 | 0.24 | 0.19 | 0.28 |
| 0.57 | 0.56 | 0.56 | 0.46 | 0.58 | 0.49 | 0.58 | 0.53 | 0.64 |
| 0.62 | 0.58 | 0.53 | 0.48 | 0.60 | 0.54 | 0.58 | 0.61 | 0.60 |
| 0.71 | 0.75 | 0.74 | 0.75 | 0.73 | 0.76 | 0.76 | 0.76 | 0.76 |
| 0.79 | 0.78 | 0.76 | 0.78 | 0.79 | 0.78 | 0.80 | 0.80 | 0.81 |
| 0.61 | 0.55 | 0.56 | 0.56 | 0.56 | 0.57 | 0.49 | 0.52 | 0.54 |
| 0.59 | 0.51 | 0.48 | 0.47 | 0.52 | 0.53 | 0.58 | 0.60 | 0.58 |
| 0.66 | 0.59 | 0.56 | 0.63 | 0.63 | 0.66 | 0.67 | 0.57 | 0.66 |
| 0.58 | 0.49 | 0.58 | 0.47 | 0.48 | 0.54 | 0.54 | 0.54 | 0.58 |
| 0.75 | 0.70 | 0.66 | 0.69 | 0.75 | 0.72 | 0.73 | 0.73 | 0.74 |
| 0.50 | 0.42 | 0.47 | 0.41 | 0.49 | 0.54 | 0.49 | 0.42 | 0.51 |
| 0.66 | 0.68 | 0.62 | 0.57 | 0.64 | 0.67 | 0.60 | 0.57 | 0.71 |

|    |      |      |      |      |      |      |      |      |      |
|----|------|------|------|------|------|------|------|------|------|
| 1  |      |      |      |      |      |      |      |      |      |
| 2  | 0.57 | 0.51 | 0.55 | 0.54 | 0.56 | 0.62 | 0.68 | 0.60 | 0.67 |
| 3  | 0.68 | 0.37 | 0.62 | 0.53 | 0.61 | 0.64 | 0.62 | 0.58 | 0.64 |
| 4  | 0.60 | 0.60 | 0.64 | 0.62 | 0.65 | 0.69 | 0.66 | 0.63 | 0.71 |
| 5  | 0.43 | 0.37 | 0.52 | 0.29 | 0.43 | 0.52 | 0.37 | 0.43 | 0.51 |
| 6  | 0.82 | 0.78 | 0.79 | 0.76 | 0.78 | 0.77 | 0.79 | 0.79 | 0.81 |
| 7  | 0.81 | 0.76 | 0.79 | 0.79 | 0.80 | 0.84 | 0.81 | 0.80 | 0.83 |
| 8  | 0.77 | 0.71 | 0.67 | 0.70 | 0.75 | 0.72 | 0.69 | 0.76 | 0.77 |
| 9  | 0.78 | 0.73 | 0.59 | 0.73 | 0.76 | 0.74 | 0.77 | 0.81 | 0.74 |
| 10 | 0.81 | 0.77 | 0.82 | 0.78 | 0.80 | 0.85 | 0.82 | 0.79 | 0.84 |
| 11 | 0.86 | 0.86 | 0.80 | 0.87 | 0.86 | 0.86 | 0.87 | 0.88 | 0.89 |
| 12 | 0.45 | 0.40 | 0.53 | 0.58 | 0.50 | 0.52 | 0.57 | 0.48 | 0.52 |
| 13 | 0.54 | 0.57 | 0.46 | 0.46 | 0.63 | 0.49 | 0.56 | 0.51 | 0.58 |
| 14 | 0.78 | 0.75 | 0.76 | 0.81 | 0.70 | 0.77 | 0.84 | 0.75 | 0.77 |
| 15 | 0.79 | 0.78 | 0.81 | 0.83 | 0.79 | 0.85 | 0.86 | 0.80 | 0.86 |
| 16 | 0.86 | 0.85 | 0.87 | 0.84 | 0.87 | 0.85 | 0.87 | 0.85 | 0.85 |
| 17 | 0.93 | 0.93 | 0.90 | 0.91 | 0.92 | 0.91 | 0.92 | 0.93 | 0.92 |
| 18 | 0.95 | 0.93 | 0.93 | 0.93 | 0.95 | 0.94 | 0.95 | 0.94 | 0.94 |
| 19 |      |      |      |      |      |      |      |      |      |
| 20 |      |      |      |      |      |      |      |      |      |
| 21 |      |      |      |      |      |      |      |      |      |
| 22 |      |      |      |      |      |      |      |      |      |
| 23 |      |      |      |      |      |      |      |      |      |
| 24 |      |      |      |      |      |      |      |      |      |
| 25 |      |      |      |      |      |      |      |      |      |
| 26 |      |      |      |      |      |      |      |      |      |
| 27 |      |      |      |      |      |      |      |      |      |
| 28 |      |      |      |      |      |      |      |      |      |
| 29 |      |      |      |      |      |      |      |      |      |
| 30 |      |      |      |      |      |      |      |      |      |
| 31 |      |      |      |      |      |      |      |      |      |
| 32 |      |      |      |      |      |      |      |      |      |
| 33 |      |      |      |      |      |      |      |      |      |
| 34 |      |      |      |      |      |      |      |      |      |
| 35 |      |      |      |      |      |      |      |      |      |
| 36 |      |      |      |      |      |      |      |      |      |
| 37 |      |      |      |      |      |      |      |      |      |
| 38 |      |      |      |      |      |      |      |      |      |
| 39 |      |      |      |      |      |      |      |      |      |
| 40 |      |      |      |      |      |      |      |      |      |
| 41 |      |      |      |      |      |      |      |      |      |
| 42 |      |      |      |      |      |      |      |      |      |
| 43 |      |      |      |      |      |      |      |      |      |
| 44 |      |      |      |      |      |      |      |      |      |
| 45 |      |      |      |      |      |      |      |      |      |
| 46 |      |      |      |      |      |      |      |      |      |
| 47 |      |      |      |      |      |      |      |      |      |
| 48 |      |      |      |      |      |      |      |      |      |
| 49 |      |      |      |      |      |      |      |      |      |
| 50 |      |      |      |      |      |      |      |      |      |
| 51 |      |      |      |      |      |      |      |      |      |
| 52 |      |      |      |      |      |      |      |      |      |
| 53 |      |      |      |      |      |      |      |      |      |
| 54 |      |      |      |      |      |      |      |      |      |
| 55 |      |      |      |      |      |      |      |      |      |
| 56 |      |      |      |      |      |      |      |      |      |
| 57 |      |      |      |      |      |      |      |      |      |
| 58 |      |      |      |      |      |      |      |      |      |
| 59 |      |      |      |      |      |      |      |      |      |
| 60 |      |      |      |      |      |      |      |      |      |



1  
2  
3  
4  
5  
6  
7  
8  
9  
10  
11  
12  
13  
14  
15  
16  
17  
18  
19  
20  
21  
22  
23  
24  
25  
26  
27  
28  
29  
30  
31  
32  
33  
34  
35  
36  
37  
38  
39  
40  
41  
42  
43  
44  
45  
46  
47  
48  
49  
50  
51  
52  
53  
54  
55  
56  
57  
58  
59  
60

506 506 507 516 517 523 529 540 542

| RXH  | RXK  | RD1  | RJL  | RXF  | RQ8  | RXQ  | RTF  | RD3  |
|------|------|------|------|------|------|------|------|------|
| 0.58 | 0.59 | 0.61 | 0.61 | 0.60 | 0.61 | 0.58 | 0.60 | 0.63 |
| 0.58 | 0.61 | 0.60 | 0.61 | 0.62 | 0.60 | 0.61 | 0.61 | 0.61 |
| 0.47 | 0.46 | 0.44 | 0.49 | 0.48 | 0.48 | 0.45 | 0.43 | 0.48 |
| 0.27 | 0.29 | 0.31 | 0.24 | 0.24 | 0.20 | 0.16 | 0.28 | 0.37 |
| 0.46 | 0.47 | 0.43 | 0.39 | 0.44 | 0.41 | 0.45 | 0.37 | 0.42 |
| 0.63 | 0.62 | 0.61 | 0.64 | 0.60 | 0.62 | 0.64 | 0.58 | 0.66 |
| 0.66 | 0.67 | 0.67 | 0.67 | 0.68 | 0.67 | 0.67 | 0.68 | 0.69 |
| 0.55 | 0.47 | 0.57 | 0.61 | 0.60 | 0.59 | 0.56 | 0.53 | 0.57 |
| 0.53 | 0.55 | 0.56 | 0.59 | 0.57 | 0.54 | 0.59 | 0.55 | 0.58 |
| 0.57 | 0.53 | 0.55 | 0.59 | 0.56 | 0.55 | 0.57 | 0.52 | 0.58 |
| 0.51 | 0.54 | 0.50 | 0.53 | 0.53 | 0.53 | 0.52 | 0.45 | 0.53 |
| 0.16 | 0.20 | 0.24 | 0.16 | 0.18 | 0.15 | 0.16 | 0.18 | 0.34 |
| 0.61 | 0.62 | 0.59 | 0.65 | 0.60 | 0.63 | 0.61 | 0.58 | 0.66 |
| 0.73 | 0.73 | 0.73 | 0.72 | 0.71 | 0.72 | 0.74 | 0.69 | 0.73 |
| 0.51 | 0.50 | 0.46 | 0.49 | 0.47 | 0.51 | 0.53 | 0.45 | 0.48 |
| 0.48 | 0.53 | 0.44 | 0.45 | 0.51 | 0.41 | 0.43 | 0.43 | 0.45 |
| 0.70 | 0.70 | 0.67 | 0.71 | 0.71 | 0.70 | 0.71 | 0.69 | 0.71 |
| 0.47 | 0.60 | 0.55 | 0.64 | 0.62 | 0.58 | 0.62 | 0.61 | 0.64 |
| 0.63 | 0.65 | 0.63 | 0.59 | 0.66 | 0.64 | 0.59 | 0.57 | 0.64 |
| 0.73 | 0.71 | 0.72 | 0.75 | 0.74 | 0.73 | 0.74 | 0.73 | 0.76 |
| 0.69 | 0.72 | 0.72 | 0.72 | 0.74 | 0.73 | 0.72 | 0.74 | 0.73 |
| 0.71 | 0.71 | 0.70 | 0.74 | 0.70 | 0.72 | 0.73 | 0.69 | 0.72 |
| 0.23 | 0.25 | 0.28 | 0.28 | 0.34 | 0.19 | 0.34 | 0.32 | 0.26 |
| 0.57 | 0.62 | 0.57 | 0.56 | 0.61 | 0.58 | 0.59 | 0.51 | 0.56 |
| 0.68 | 0.62 | 0.56 | 0.67 | 0.61 | 0.64 | 0.64 | 0.55 | 0.58 |
| 0.77 | 0.77 | 0.76 | 0.77 | 0.77 | 0.77 | 0.76 | 0.78 | 0.78 |
| 0.80 | 0.81 | 0.81 | 0.81 | 0.81 | 0.81 | 0.81 | 0.81 | 0.81 |
| 0.55 | 0.65 | 0.58 | 0.53 | 0.60 | 0.49 | 0.56 | 0.55 | 0.56 |
| 0.41 | 0.54 | 0.56 | 0.61 | 0.58 | 0.53 | 0.57 | 0.57 | 0.62 |
| 0.67 | 0.64 | 0.65 | 0.67 | 0.68 | 0.64 | 0.65 | 0.67 | 0.68 |
| 0.59 | 0.62 | 0.60 | 0.65 | 0.65 | 0.57 | 0.60 | 0.58 | 0.59 |
| 0.77 | 0.74 | 0.70 | 0.75 | 0.72 | 0.74 | 0.72 | 0.73 | 0.76 |
| 0.55 | 0.52 | 0.47 | 0.53 | 0.49 | 0.57 | 0.51 | 0.37 | 0.44 |
| 0.70 | 0.72 | 0.66 | 0.70 | 0.68 | 0.70 | 0.65 | 0.56 | 0.62 |

|    |      |      |      |      |      |      |      |      |      |
|----|------|------|------|------|------|------|------|------|------|
| 1  |      |      |      |      |      |      |      |      |      |
| 2  | 0.61 | 0.67 | 0.57 | 0.66 | 0.63 | 0.64 | 0.68 | 0.61 | 0.60 |
| 3  | 0.62 | 0.61 | 0.60 | 0.68 | 0.64 | 0.67 | 0.66 | 0.65 | 0.69 |
| 4  | 0.65 | 0.67 | 0.64 | 0.64 | 0.71 | 0.65 | 0.64 | 0.70 | 0.72 |
| 5  | 0.52 | 0.53 | 0.55 | 0.48 | 0.49 | 0.53 | 0.51 | 0.58 | 0.48 |
| 6  | 0.78 | 0.80 | 0.81 | 0.81 | 0.83 | 0.79 | 0.78 | 0.78 | 0.81 |
| 7  | 0.79 | 0.82 | 0.80 | 0.82 | 0.84 | 0.80 | 0.79 | 0.85 | 0.85 |
| 8  | 0.80 | 0.76 | 0.70 | 0.83 | 0.75 | 0.79 | 0.76 | 0.76 | 0.75 |
| 9  | 0.80 | 0.75 | 0.72 | 0.73 | 0.71 | 0.80 | 0.83 | 0.73 | 0.75 |
| 10 | 0.80 | 0.75 | 0.72 | 0.73 | 0.71 | 0.80 | 0.83 | 0.73 | 0.75 |
| 11 | 0.83 | 0.85 | 0.82 | 0.86 | 0.85 | 0.83 | 0.81 | 0.85 | 0.84 |
| 12 | 0.81 | 0.82 | 0.88 | 0.90 | 0.87 | 0.89 | 0.88 | 0.89 | 0.89 |
| 13 | 0.59 | 0.64 | 0.55 | 0.65 | 0.64 | 0.55 | 0.63 | 0.48 | 0.63 |
| 14 | 0.61 | 0.72 | 0.53 | 0.66 | 0.51 | 0.54 | 0.62 | 0.53 | 0.58 |
| 15 | 0.86 | 0.76 | 0.80 | 0.83 | 0.86 | 0.79 | 0.81 | 0.79 | 0.72 |
| 16 | 0.82 | 0.86 | 0.82 | 0.87 | 0.86 | 0.85 | 0.82 | 0.86 | 0.85 |
| 17 | 0.82 | 0.86 | 0.82 | 0.87 | 0.86 | 0.85 | 0.82 | 0.86 | 0.85 |
| 18 | 0.87 | 0.87 | 0.86 | 0.88 | 0.88 | 0.88 | 0.88 | 0.86 | 0.88 |
| 19 | 0.94 | 0.94 | 0.94 | 0.94 | 0.93 | 0.94 | 0.93 | 0.91 | 0.92 |
| 20 | 0.95 | 0.95 | 0.95 | 0.94 | 0.95 | 0.94 | 0.95 | 0.94 | 0.94 |
| 21 |      |      |      |      |      |      |      |      |      |
| 22 |      |      |      |      |      |      |      |      |      |
| 23 |      |      |      |      |      |      |      |      |      |
| 24 |      |      |      |      |      |      |      |      |      |
| 25 |      |      |      |      |      |      |      |      |      |
| 26 |      |      |      |      |      |      |      |      |      |
| 27 |      |      |      |      |      |      |      |      |      |
| 28 |      |      |      |      |      |      |      |      |      |
| 29 |      |      |      |      |      |      |      |      |      |
| 30 |      |      |      |      |      |      |      |      |      |
| 31 |      |      |      |      |      |      |      |      |      |
| 32 |      |      |      |      |      |      |      |      |      |
| 33 |      |      |      |      |      |      |      |      |      |
| 34 |      |      |      |      |      |      |      |      |      |
| 35 |      |      |      |      |      |      |      |      |      |
| 36 |      |      |      |      |      |      |      |      |      |
| 37 |      |      |      |      |      |      |      |      |      |
| 38 |      |      |      |      |      |      |      |      |      |
| 39 |      |      |      |      |      |      |      |      |      |
| 40 |      |      |      |      |      |      |      |      |      |
| 41 |      |      |      |      |      |      |      |      |      |
| 42 |      |      |      |      |      |      |      |      |      |
| 43 |      |      |      |      |      |      |      |      |      |
| 44 |      |      |      |      |      |      |      |      |      |
| 45 |      |      |      |      |      |      |      |      |      |
| 46 |      |      |      |      |      |      |      |      |      |
| 47 |      |      |      |      |      |      |      |      |      |
| 48 |      |      |      |      |      |      |      |      |      |
| 49 |      |      |      |      |      |      |      |      |      |
| 50 |      |      |      |      |      |      |      |      |      |
| 51 |      |      |      |      |      |      |      |      |      |
| 52 |      |      |      |      |      |      |      |      |      |
| 53 |      |      |      |      |      |      |      |      |      |
| 54 |      |      |      |      |      |      |      |      |      |
| 55 |      |      |      |      |      |      |      |      |      |
| 56 |      |      |      |      |      |      |      |      |      |
| 57 |      |      |      |      |      |      |      |      |      |
| 58 |      |      |      |      |      |      |      |      |      |
| 59 |      |      |      |      |      |      |      |      |      |
| 60 |      |      |      |      |      |      |      |      |      |

1  
2  
3  
4  
5  
6  
7  
8  
9  
10  
11  
12  
13  
14  
15  
16  
17  
18  
19  
20  
21  
22  
23  
24  
25  
26  
27  
28  
29  
30  
31  
32  
33  
34  
35  
36  
37  
38  
39  
40  
41  
42  
43  
44  
45  
46  
47  
48  
49  
50  
51  
52  
53  
54  
55  
56  
57  
58  
59  
60

548 552 572 594 602 613 623 631 644

| RW6  | RNA  | RA9  | RA2  | RTX  | RXC  | RXL  | RBA  | RAJ  |
|------|------|------|------|------|------|------|------|------|
| 0.64 | 0.61 | 0.58 | 0.63 | 0.63 | 0.64 | 0.63 | 0.63 | 0.64 |
| 0.63 | 0.62 | 0.60 | 0.62 | 0.62 | 0.63 | 0.66 | 0.63 | 0.64 |
| 0.47 | 0.49 | 0.46 | 0.55 | 0.46 | 0.49 | 0.53 | 0.50 | 0.53 |
| 0.29 | 0.21 | 0.39 | 0.32 | 0.22 | 0.21 | 0.25 | 0.33 | 0.41 |
| 0.44 | 0.45 | 0.46 | 0.52 | 0.39 | 0.43 | 0.45 | 0.46 | 0.46 |
| 0.66 | 0.63 | 0.63 | 0.67 | 0.65 | 0.68 | 0.67 | 0.65 | 0.69 |
| 0.68 | 0.68 | 0.68 | 0.71 | 0.70 | 0.70 | 0.72 | 0.71 | 0.72 |
| 0.57 | 0.57 | 0.54 | 0.57 | 0.59 | 0.62 | 0.62 | 0.60 | 0.60 |
| 0.62 | 0.60 | 0.58 | 0.62 | 0.60 | 0.63 | 0.62 | 0.62 | 0.56 |
| 0.59 | 0.57 | 0.56 | 0.61 | 0.56 | 0.61 | 0.62 | 0.60 | 0.61 |
| 0.51 | 0.53 | 0.46 | 0.62 | 0.49 | 0.52 | 0.57 | 0.49 | 0.59 |
| 0.21 | 0.13 | 0.35 | 0.30 | 0.17 | 0.22 | 0.25 | 0.29 | 0.40 |
| 0.65 | 0.64 | 0.62 | 0.67 | 0.65 | 0.68 | 0.67 | 0.63 | 0.67 |
| 0.75 | 0.74 | 0.72 | 0.76 | 0.74 | 0.77 | 0.76 | 0.75 | 0.76 |
| 0.53 | 0.54 | 0.51 | 0.66 | 0.53 | 0.56 | 0.50 | 0.46 | 0.59 |
| 0.51 | 0.48 | 0.48 | 0.57 | 0.47 | 0.50 | 0.51 | 0.38 | 0.58 |
| 0.74 | 0.72 | 0.65 | 0.73 | 0.71 | 0.74 | 0.74 | 0.72 | 0.76 |
| 0.52 | 0.65 | 0.56 | 0.56 | 0.60 | 0.65 | 0.66 | 0.64 | 0.69 |
| 0.65 | 0.64 | 0.62 | 0.73 | 0.61 | 0.66 | 0.68 | 0.62 | 0.70 |
| 0.75 | 0.75 | 0.72 | 0.75 | 0.75 | 0.77 | 0.77 | 0.73 | 0.76 |
| 0.75 | 0.74 | 0.73 | 0.76 | 0.73 | 0.75 | 0.76 | 0.74 | 0.76 |
| 0.75 | 0.75 | 0.71 | 0.73 | 0.72 | 0.76 | 0.75 | 0.72 | 0.75 |
| 0.29 | 0.19 | 0.34 | 0.35 | 0.28 | 0.17 | 0.28 | 0.31 | 0.31 |
| 0.61 | 0.61 | 0.57 | 0.66 | 0.58 | 0.58 | 0.61 | 0.56 | 0.66 |
| 0.62 | 0.69 | 0.62 | 0.70 | 0.67 | 0.68 | 0.66 | 0.63 | 0.64 |
| 0.77 | 0.78 | 0.78 | 0.78 | 0.80 | 0.78 | 0.81 | 0.81 | 0.78 |
| 0.83 | 0.82 | 0.82 | 0.83 | 0.82 | 0.84 | 0.84 | 0.83 | 0.84 |
| 0.62 | 0.56 | 0.55 | 0.69 | 0.51 | 0.58 | 0.62 | 0.52 | 0.59 |
| 0.49 | 0.58 | 0.45 | 0.54 | 0.57 | 0.60 | 0.61 | 0.55 | 0.66 |
| 0.70 | 0.66 | 0.59 | 0.68 | 0.68 | 0.70 | 0.72 | 0.66 | 0.70 |
| 0.68 | 0.56 | 0.53 | 0.65 | 0.55 | 0.62 | 0.63 | 0.59 | 0.58 |
| 0.74 | 0.75 | 0.75 | 0.81 | 0.79 | 0.80 | 0.78 | 0.75 | 0.78 |
| 0.63 | 0.56 | 0.48 | 0.52 | 0.54 | 0.54 | 0.65 | 0.48 | 0.49 |
| 0.70 | 0.69 | 0.62 | 0.75 | 0.62 | 0.71 | 0.73 | 0.69 | 0.72 |

|    |      |      |      |      |      |      |      |      |      |
|----|------|------|------|------|------|------|------|------|------|
| 1  |      |      |      |      |      |      |      |      |      |
| 2  | 0.71 | 0.63 | 0.67 | 0.63 | 0.63 | 0.76 | 0.69 | 0.65 | 0.66 |
| 3  | 0.69 | 0.70 | 0.65 | 0.69 | 0.64 | 0.70 | 0.63 | 0.60 | 0.71 |
| 4  | 0.74 | 0.66 | 0.65 | 0.68 | 0.67 | 0.67 | 0.72 | 0.66 | 0.72 |
| 5  | 0.60 | 0.52 | 0.43 | 0.60 | 0.59 | 0.49 | 0.59 | 0.50 | 0.43 |
| 6  | 0.81 | 0.83 | 0.79 | 0.86 | 0.79 | 0.81 | 0.82 | 0.77 | 0.85 |
| 7  | 0.86 | 0.81 | 0.80 | 0.83 | 0.84 | 0.83 | 0.86 | 0.82 | 0.85 |
| 8  | 0.83 | 0.81 | 0.74 | 0.82 | 0.79 | 0.83 | 0.79 | 0.74 | 0.79 |
| 9  | 0.81 | 0.80 | 0.79 | 0.81 | 0.79 | 0.84 | 0.84 | 0.76 | 0.81 |
| 10 | 0.85 | 0.86 | 0.81 | 0.81 | 0.85 | 0.85 | 0.86 | 0.84 | 0.86 |
| 11 | 0.89 | 0.86 | 0.87 | 0.90 | 0.88 | 0.90 | 0.90 | 0.90 | 0.90 |
| 12 | 0.66 | 0.67 | 0.66 | 0.67 | 0.52 | 0.52 | 0.59 | 0.43 | 0.52 |
| 13 | 0.68 | 0.74 | 0.53 | 0.70 | 0.70 | 0.62 | 0.53 | 0.46 | 0.75 |
| 14 | 0.84 | 0.86 | 0.79 | 0.83 | 0.82 | 0.77 | 0.74 | 0.81 | 0.85 |
| 15 | 0.87 | 0.84 | 0.78 | 0.86 | 0.85 | 0.89 | 0.87 | 0.83 | 0.80 |
| 16 | 0.87 | 0.90 | 0.88 | 0.92 | 0.87 | 0.86 | 0.91 | 0.89 | 0.91 |
| 17 | 0.94 | 0.95 | 0.93 | 0.95 | 0.94 | 0.95 | 0.94 | 0.91 | 0.95 |
| 18 | 0.94 | 0.95 | 0.94 | 0.95 | 0.96 | 0.95 | 0.95 | 0.96 | 0.95 |
| 19 |      |      |      |      |      |      |      |      |      |
| 20 |      |      |      |      |      |      |      |      |      |
| 21 |      |      |      |      |      |      |      |      |      |
| 22 |      |      |      |      |      |      |      |      |      |
| 23 |      |      |      |      |      |      |      |      |      |
| 24 |      |      |      |      |      |      |      |      |      |
| 25 |      |      |      |      |      |      |      |      |      |
| 26 |      |      |      |      |      |      |      |      |      |
| 27 |      |      |      |      |      |      |      |      |      |
| 28 |      |      |      |      |      |      |      |      |      |
| 29 |      |      |      |      |      |      |      |      |      |
| 30 |      |      |      |      |      |      |      |      |      |
| 31 |      |      |      |      |      |      |      |      |      |
| 32 |      |      |      |      |      |      |      |      |      |
| 33 |      |      |      |      |      |      |      |      |      |
| 34 |      |      |      |      |      |      |      |      |      |
| 35 |      |      |      |      |      |      |      |      |      |
| 36 |      |      |      |      |      |      |      |      |      |
| 37 |      |      |      |      |      |      |      |      |      |
| 38 |      |      |      |      |      |      |      |      |      |
| 39 |      |      |      |      |      |      |      |      |      |
| 40 |      |      |      |      |      |      |      |      |      |
| 41 |      |      |      |      |      |      |      |      |      |
| 42 |      |      |      |      |      |      |      |      |      |
| 43 |      |      |      |      |      |      |      |      |      |
| 44 |      |      |      |      |      |      |      |      |      |
| 45 |      |      |      |      |      |      |      |      |      |
| 46 |      |      |      |      |      |      |      |      |      |
| 47 |      |      |      |      |      |      |      |      |      |
| 48 |      |      |      |      |      |      |      |      |      |
| 49 |      |      |      |      |      |      |      |      |      |
| 50 |      |      |      |      |      |      |      |      |      |
| 51 |      |      |      |      |      |      |      |      |      |
| 52 |      |      |      |      |      |      |      |      |      |
| 53 |      |      |      |      |      |      |      |      |      |
| 54 |      |      |      |      |      |      |      |      |      |
| 55 |      |      |      |      |      |      |      |      |      |
| 56 |      |      |      |      |      |      |      |      |      |
| 57 |      |      |      |      |      |      |      |      |      |
| 58 |      |      |      |      |      |      |      |      |      |
| 59 |      |      |      |      |      |      |      |      |      |
| 60 |      |      |      |      |      |      |      |      |      |

1  
2  
3  
4  
5  
6  
7  
8  
9  
10  
11  
12  
13  
14  
15  
16  
17  
18  
19  
20  
21  
22  
23  
24  
25  
26  
27  
28  
29  
30  
31  
32  
33  
34  
35  
36  
37  
38  
39  
40  
41  
42  
43  
44  
45  
46  
47  
48  
49  
50  
51  
52  
53  
54  
55  
56  
57  
58  
59  
60

659 666 673 678 698 707 723 728 738

| RRK  | RHU  | RXR  | RJ7  | RR1  | RYR  | RXN  | RYJ  | RX1  |
|------|------|------|------|------|------|------|------|------|
| 0.67 | 0.66 | 0.65 | 0.67 | 0.65 | 0.69 | 0.65 | 0.70 | 0.68 |
| 0.66 | 0.66 | 0.68 | 0.66 | 0.68 | 0.67 | 0.68 | 0.68 | 0.69 |
| 0.60 | 0.55 | 0.53 | 0.57 | 0.58 | 0.50 | 0.55 | 0.61 | 0.62 |
| 0.31 | 0.49 | 0.28 | 0.31 | 0.29 | 0.26 | 0.54 | 0.43 | 0.49 |
| 0.53 | 0.49 | 0.47 | 0.51 | 0.56 | 0.45 | 0.55 | 0.58 | 0.57 |
| 0.68 | 0.68 | 0.72 | 0.70 | 0.70 | 0.71 | 0.70 | 0.73 | 0.70 |
| 0.72 | 0.72 | 0.73 | 0.73 | 0.73 | 0.74 | 0.75 | 0.75 | 0.75 |
| 0.62 | 0.60 | 0.63 | 0.63 | 0.61 | 0.61 | 0.62 | 0.67 | 0.64 |
| 0.65 | 0.64 | 0.63 | 0.63 | 0.64 | 0.64 | 0.63 | 0.68 | 0.65 |
| 0.62 | 0.61 | 0.65 | 0.65 | 0.64 | 0.65 | 0.64 | 0.68 | 0.63 |
| 0.64 | 0.62 | 0.58 | 0.59 | 0.64 | 0.54 | 0.59 | 0.65 | 0.67 |
| 0.23 | 0.42 | 0.28 | 0.30 | 0.23 | 0.26 | 0.49 | 0.45 | 0.41 |
| 0.68 | 0.68 | 0.71 | 0.71 | 0.72 | 0.68 | 0.67 | 0.74 | 0.73 |
| 0.78 | 0.77 | 0.79 | 0.79 | 0.79 | 0.79 | 0.78 | 0.80 | 0.80 |
| 0.64 | 0.62 | 0.54 | 0.62 | 0.64 | 0.57 | 0.63 | 0.68 | 0.65 |
| 0.60 | 0.55 | 0.52 | 0.62 | 0.61 | 0.43 | 0.58 | 0.64 | 0.62 |
| 0.74 | 0.74 | 0.76 | 0.77 | 0.77 | 0.77 | 0.76 | 0.80 | 0.78 |
| 0.60 | 0.70 | 0.68 | 0.68 | 0.68 | 0.71 | 0.62 | 0.70 | 0.70 |
| 0.75 | 0.71 | 0.69 | 0.73 | 0.74 | 0.67 | 0.70 | 0.77 | 0.77 |
| 0.77 | 0.79 | 0.80 | 0.79 | 0.78 | 0.79 | 0.77 | 0.82 | 0.79 |
| 0.77 | 0.77 | 0.79 | 0.78 | 0.79 | 0.78 | 0.78 | 0.81 | 0.80 |
| 0.77 | 0.78 | 0.79 | 0.78 | 0.79 | 0.78 | 0.77 | 0.81 | 0.79 |
| 0.39 | 0.40 | 0.26 | 0.39 | 0.34 | 0.36 | 0.34 | 0.49 | 0.30 |
| 0.70 | 0.63 | 0.66 | 0.65 | 0.70 | 0.60 | 0.64 | 0.73 | 0.74 |
| 0.70 | 0.72 | 0.69 | 0.63 | 0.74 | 0.68 | 0.69 | 0.73 | 0.70 |
| 0.82 | 0.80 | 0.82 | 0.79 | 0.81 | 0.79 | 0.83 | 0.81 | 0.83 |
| 0.85 | 0.84 | 0.85 | 0.86 | 0.86 | 0.85 | 0.85 | 0.86 | 0.87 |
| 0.73 | 0.66 | 0.67 | 0.68 | 0.71 | 0.60 | 0.68 | 0.76 | 0.65 |
| 0.56 | 0.67 | 0.68 | 0.67 | 0.61 | 0.68 | 0.59 | 0.73 | 0.64 |
| 0.74 | 0.70 | 0.75 | 0.74 | 0.73 | 0.71 | 0.72 | 0.77 | 0.73 |
| 0.68 | 0.69 | 0.68 | 0.71 | 0.70 | 0.59 | 0.61 | 0.76 | 0.70 |
| 0.81 | 0.81 | 0.81 | 0.80 | 0.80 | 0.80 | 0.78 | 0.85 | 0.81 |
| 0.60 | 0.63 | 0.60 | 0.61 | 0.66 | 0.60 | 0.58 | 0.68 | 0.64 |
| 0.78 | 0.78 | 0.73 | 0.77 | 0.78 | 0.68 | 0.75 | 0.81 | 0.80 |

|    |      |      |      |      |      |      |      |      |      |
|----|------|------|------|------|------|------|------|------|------|
| 1  |      |      |      |      |      |      |      |      |      |
| 2  | 0.73 | 0.69 | 0.75 | 0.77 | 0.74 | 0.75 | 0.74 | 0.81 | 0.76 |
| 3  | 0.75 | 0.74 | 0.71 | 0.72 | 0.73 | 0.66 | 0.68 | 0.78 | 0.77 |
| 4  | 0.74 | 0.74 | 0.79 | 0.72 | 0.75 | 0.69 | 0.77 | 0.78 | 0.74 |
| 5  | 0.58 | 0.57 | 0.62 | 0.62 | 0.71 | 0.56 | 0.57 | 0.73 | 0.63 |
| 6  | 0.88 | 0.86 | 0.84 | 0.85 | 0.87 | 0.82 | 0.85 | 0.88 | 0.89 |
| 7  | 0.85 | 0.84 | 0.88 | 0.84 | 0.87 | 0.83 | 0.87 | 0.87 | 0.86 |
| 8  | 0.80 | 0.81 | 0.80 | 0.87 | 0.84 | 0.84 | 0.82 | 0.88 | 0.84 |
| 9  | 0.80 | 0.85 | 0.83 | 0.85 | 0.82 | 0.86 | 0.82 | 0.88 | 0.84 |
| 10 | 0.80 | 0.85 | 0.83 | 0.85 | 0.82 | 0.86 | 0.82 | 0.88 | 0.84 |
| 11 | 0.87 | 0.87 | 0.88 | 0.87 | 0.88 | 0.85 | 0.87 | 0.89 | 0.89 |
| 12 | 0.89 | 0.89 | 0.87 | 0.91 | 0.85 | 0.90 | 0.87 | 0.92 | 0.90 |
| 13 | 0.71 | 0.72 | 0.71 | 0.76 | 0.64 | 0.66 | 0.72 | 0.82 | 0.71 |
| 14 | 0.63 | 0.64 | 0.71 | 0.71 | 0.71 | 0.71 | 0.66 | 0.79 | 0.69 |
| 15 | 0.84 | 0.83 | 0.80 | 0.85 | 0.86 | 0.85 | 0.83 | 0.79 | 0.81 |
| 16 | 0.89 | 0.84 | 0.89 | 0.89 | 0.89 | 0.88 | 0.86 | 0.88 | 0.84 |
| 17 | 0.89 | 0.84 | 0.89 | 0.89 | 0.89 | 0.88 | 0.86 | 0.88 | 0.84 |
| 18 | 0.93 | 0.92 | 0.89 | 0.92 | 0.92 | 0.87 | 0.90 | 0.93 | 0.92 |
| 19 | 0.95 | 0.95 | 0.95 | 0.96 | 0.95 | 0.95 | 0.95 | 0.96 | 0.96 |
| 20 | 0.97 | 0.96 | 0.95 | 0.96 | 0.95 | 0.96 | 0.95 | 0.97 | 0.97 |
| 21 |      |      |      |      |      |      |      |      |      |
| 22 |      |      |      |      |      |      |      |      |      |
| 23 |      |      |      |      |      |      |      |      |      |
| 24 |      |      |      |      |      |      |      |      |      |
| 25 |      |      |      |      |      |      |      |      |      |
| 26 |      |      |      |      |      |      |      |      |      |
| 27 |      |      |      |      |      |      |      |      |      |
| 28 |      |      |      |      |      |      |      |      |      |
| 29 |      |      |      |      |      |      |      |      |      |
| 30 |      |      |      |      |      |      |      |      |      |
| 31 |      |      |      |      |      |      |      |      |      |
| 32 |      |      |      |      |      |      |      |      |      |
| 33 |      |      |      |      |      |      |      |      |      |
| 34 |      |      |      |      |      |      |      |      |      |
| 35 |      |      |      |      |      |      |      |      |      |
| 36 |      |      |      |      |      |      |      |      |      |
| 37 |      |      |      |      |      |      |      |      |      |
| 38 |      |      |      |      |      |      |      |      |      |
| 39 |      |      |      |      |      |      |      |      |      |
| 40 |      |      |      |      |      |      |      |      |      |
| 41 |      |      |      |      |      |      |      |      |      |
| 42 |      |      |      |      |      |      |      |      |      |
| 43 |      |      |      |      |      |      |      |      |      |
| 44 |      |      |      |      |      |      |      |      |      |
| 45 |      |      |      |      |      |      |      |      |      |
| 46 |      |      |      |      |      |      |      |      |      |
| 47 |      |      |      |      |      |      |      |      |      |
| 48 |      |      |      |      |      |      |      |      |      |
| 49 |      |      |      |      |      |      |      |      |      |
| 50 |      |      |      |      |      |      |      |      |      |
| 51 |      |      |      |      |      |      |      |      |      |
| 52 |      |      |      |      |      |      |      |      |      |
| 53 |      |      |      |      |      |      |      |      |      |
| 54 |      |      |      |      |      |      |      |      |      |
| 55 |      |      |      |      |      |      |      |      |      |
| 56 |      |      |      |      |      |      |      |      |      |
| 57 |      |      |      |      |      |      |      |      |      |
| 58 |      |      |      |      |      |      |      |      |      |
| 59 |      |      |      |      |      |      |      |      |      |
| 60 |      |      |      |      |      |      |      |      |      |

1  
2  
3  
4  
5  
6  
7  
8  
9  
10  
11  
12  
13  
14  
15  
16  
17  
18  
19  
20  
21  
22  
23  
24  
25  
26  
27  
28  
29  
30  
31  
32  
33  
34  
35  
36  
37  
38  
39  
40  
41  
42  
43  
44  
45  
46  
47  
48  
49  
50  
51  
52  
53  
54  
55  
56  
57  
58  
59  
60

740 743 748 750 765 766 770 781 801

| RWD  | RL4  | RN5  | RDU  | RBV  | RA7  | REF  | RAL  | RKB  |
|------|------|------|------|------|------|------|------|------|
| 0.68 | 0.69 | 0.70 | 0.69 | 0.70 | 0.70 | 0.67 | 0.71 | 0.71 |
| 0.69 | 0.69 | 0.70 | 0.68 | 0.70 | 0.70 | 0.69 | 0.70 | 0.71 |
| 0.55 | 0.57 | 0.57 | 0.53 | 0.62 | 0.58 | 0.55 | 0.58 | 0.61 |
| 0.48 | 0.40 | 0.36 | 0.28 | 0.43 | 0.47 | 0.43 | 0.39 | 0.41 |
| 0.52 | 0.50 | 0.50 | 0.51 | 0.55 | 0.53 | 0.48 | 0.58 | 0.54 |
| 0.73 | 0.71 | 0.72 | 0.72 | 0.71 | 0.71 | 0.70 | 0.74 | 0.72 |
| 0.75 | 0.75 | 0.75 | 0.75 | 0.76 | 0.75 | 0.75 | 0.76 | 0.76 |
| 0.67 | 0.63 | 0.67 | 0.66 | 0.69 | 0.69 | 0.66 | 0.71 | 0.68 |
| 0.63 | 0.67 | 0.68 | 0.65 | 0.69 | 0.66 | 0.68 | 0.68 | 0.69 |
| 0.68 | 0.64 | 0.67 | 0.66 | 0.64 | 0.68 | 0.65 | 0.71 | 0.65 |
| 0.62 | 0.63 | 0.62 | 0.58 | 0.65 | 0.64 | 0.61 | 0.64 | 0.66 |
| 0.39 | 0.38 | 0.36 | 0.29 | 0.39 | 0.46 | 0.36 | 0.36 | 0.37 |
| 0.73 | 0.70 | 0.72 | 0.72 | 0.71 | 0.72 | 0.68 | 0.76 | 0.72 |
| 0.80 | 0.80 | 0.80 | 0.80 | 0.81 | 0.81 | 0.79 | 0.81 | 0.80 |
| 0.61 | 0.62 | 0.55 | 0.60 | 0.69 | 0.64 | 0.62 | 0.62 | 0.71 |
| 0.57 | 0.57 | 0.53 | 0.53 | 0.57 | 0.56 | 0.56 | 0.59 | 0.63 |
| 0.79 | 0.78 | 0.79 | 0.77 | 0.77 | 0.78 | 0.77 | 0.81 | 0.79 |
| 0.72 | 0.71 | 0.69 | 0.65 | 0.69 | 0.74 | 0.66 | 0.66 | 0.71 |
| 0.72 | 0.74 | 0.71 | 0.70 | 0.70 | 0.73 | 0.69 | 0.74 | 0.76 |
| 0.81 | 0.79 | 0.81 | 0.81 | 0.82 | 0.82 | 0.78 | 0.82 | 0.82 |
| 0.81 | 0.80 | 0.79 | 0.79 | 0.81 | 0.81 | 0.80 | 0.81 | 0.81 |
| 0.81 | 0.80 | 0.78 | 0.79 | 0.80 | 0.80 | 0.78 | 0.81 | 0.81 |
| 0.31 | 0.30 | 0.34 | 0.41 | 0.34 | 0.40 | 0.39 | 0.46 | 0.30 |
| 0.71 | 0.71 | 0.61 | 0.67 | 0.66 | 0.70 | 0.65 | 0.69 | 0.72 |
| 0.70 | 0.74 | 0.73 | 0.69 | 0.71 | 0.70 | 0.73 | 0.72 | 0.72 |
| 0.81 | 0.81 | 0.80 | 0.81 | 0.82 | 0.82 | 0.83 | 0.82 | 0.84 |
| 0.87 | 0.86 | 0.86 | 0.86 | 0.87 | 0.87 | 0.86 | 0.87 | 0.87 |
| 0.67 | 0.71 | 0.59 | 0.64 | 0.68 | 0.64 | 0.61 | 0.69 | 0.73 |
| 0.74 | 0.70 | 0.70 | 0.65 | 0.66 | 0.73 | 0.69 | 0.66 | 0.63 |
| 0.77 | 0.73 | 0.74 | 0.75 | 0.74 | 0.70 | 0.75 | 0.79 | 0.71 |
| 0.70 | 0.71 | 0.69 | 0.70 | 0.68 | 0.68 | 0.64 | 0.70 | 0.69 |
| 0.81 | 0.84 | 0.82 | 0.80 | 0.84 | 0.83 | 0.81 | 0.85 | 0.83 |
| 0.67 | 0.59 | 0.65 | 0.63 | 0.53 | 0.59 | 0.50 | 0.69 | 0.63 |
| 0.76 | 0.79 | 0.69 | 0.75 | 0.78 | 0.78 | 0.72 | 0.80 | 0.79 |

|    |      |      |      |      |      |      |      |      |      |
|----|------|------|------|------|------|------|------|------|------|
| 1  |      |      |      |      |      |      |      |      |      |
| 2  | 0.73 | 0.72 | 0.66 | 0.74 | 0.74 | 0.79 | 0.69 | 0.77 | 0.75 |
| 3  | 0.73 | 0.67 | 0.73 | 0.78 | 0.77 | 0.75 | 0.76 | 0.79 | 0.75 |
| 4  | 0.73 | 0.74 | 0.67 | 0.74 | 0.79 | 0.74 | 0.75 | 0.76 | 0.77 |
| 5  | 0.62 | 0.62 | 0.61 | 0.55 | 0.45 | 0.54 | 0.48 | 0.66 | 0.58 |
| 6  | 0.86 | 0.87 | 0.85 | 0.85 | 0.87 | 0.86 | 0.85 | 0.86 | 0.88 |
| 7  | 0.86 | 0.86 | 0.83 | 0.86 | 0.89 | 0.86 | 0.87 | 0.87 | 0.88 |
| 8  | 0.89 | 0.82 | 0.85 | 0.85 | 0.85 | 0.87 | 0.84 | 0.87 | 0.84 |
| 9  | 0.82 | 0.84 | 0.80 | 0.85 | 0.85 | 0.87 | 0.77 | 0.86 | 0.82 |
| 10 | 0.89 | 0.89 | 0.87 | 0.87 | 0.89 | 0.88 | 0.87 | 0.88 | 0.89 |
| 11 | 0.91 | 0.88 | 0.92 | 0.92 | 0.92 | 0.92 | 0.91 | 0.93 | 0.92 |
| 12 | 0.75 | 0.62 | 0.74 | 0.67 | 0.76 | 0.70 | 0.64 | 0.78 | 0.74 |
| 13 | 0.81 | 0.75 | 0.73 | 0.73 | 0.70 | 0.73 | 0.64 | 0.71 | 0.71 |
| 14 | 0.89 | 0.87 | 0.85 | 0.85 | 0.88 | 0.80 | 0.83 | 0.87 | 0.83 |
| 15 | 0.91 | 0.90 | 0.90 | 0.89 | 0.88 | 0.87 | 0.89 | 0.90 | 0.89 |
| 16 | 0.91 | 0.92 | 0.91 | 0.92 | 0.93 | 0.92 | 0.88 | 0.93 | 0.93 |
| 17 | 0.95 | 0.96 | 0.96 | 0.96 | 0.96 | 0.96 | 0.96 | 0.96 | 0.96 |
| 18 | 0.97 | 0.96 | 0.96 | 0.95 | 0.97 | 0.97 | 0.97 | 0.97 | 0.97 |
| 19 |      |      |      |      |      |      |      |      |      |
| 20 |      |      |      |      |      |      |      |      |      |
| 21 |      |      |      |      |      |      |      |      |      |
| 22 |      |      |      |      |      |      |      |      |      |
| 23 |      |      |      |      |      |      |      |      |      |
| 24 |      |      |      |      |      |      |      |      |      |
| 25 |      |      |      |      |      |      |      |      |      |
| 26 |      |      |      |      |      |      |      |      |      |
| 27 |      |      |      |      |      |      |      |      |      |
| 28 |      |      |      |      |      |      |      |      |      |
| 29 |      |      |      |      |      |      |      |      |      |
| 30 |      |      |      |      |      |      |      |      |      |
| 31 |      |      |      |      |      |      |      |      |      |
| 32 |      |      |      |      |      |      |      |      |      |
| 33 |      |      |      |      |      |      |      |      |      |
| 34 |      |      |      |      |      |      |      |      |      |
| 35 |      |      |      |      |      |      |      |      |      |
| 36 |      |      |      |      |      |      |      |      |      |
| 37 |      |      |      |      |      |      |      |      |      |
| 38 |      |      |      |      |      |      |      |      |      |
| 39 |      |      |      |      |      |      |      |      |      |
| 40 |      |      |      |      |      |      |      |      |      |
| 41 |      |      |      |      |      |      |      |      |      |
| 42 |      |      |      |      |      |      |      |      |      |
| 43 |      |      |      |      |      |      |      |      |      |
| 44 |      |      |      |      |      |      |      |      |      |
| 45 |      |      |      |      |      |      |      |      |      |
| 46 |      |      |      |      |      |      |      |      |      |
| 47 |      |      |      |      |      |      |      |      |      |
| 48 |      |      |      |      |      |      |      |      |      |
| 49 |      |      |      |      |      |      |      |      |      |
| 50 |      |      |      |      |      |      |      |      |      |
| 51 |      |      |      |      |      |      |      |      |      |
| 52 |      |      |      |      |      |      |      |      |      |
| 53 |      |      |      |      |      |      |      |      |      |
| 54 |      |      |      |      |      |      |      |      |      |
| 55 |      |      |      |      |      |      |      |      |      |
| 56 |      |      |      |      |      |      |      |      |      |
| 57 |      |      |      |      |      |      |      |      |      |
| 58 |      |      |      |      |      |      |      |      |      |
| 59 |      |      |      |      |      |      |      |      |      |
| 60 |      |      |      |      |      |      |      |      |      |



1  
2  
3  
4  
5  
6  
7  
8  
9  
10  
11  
12  
13  
14  
15  
16  
17  
18  
19  
20  
21  
22  
23  
24  
25  
26  
27  
28  
29  
30  
31  
32  
33  
34  
35  
36  
37  
38  
39  
40  
41  
42  
43  
44  
45  
46  
47  
48  
49  
50  
51  
52  
53  
54  
55  
56  
57  
58  
59  
60

819 827 845 861 900 923 938 963 974

| RTR  | RJZ  | RHM  | RTG  | R1H  | RK9  | RXW  | RR8  | RWP  |
|------|------|------|------|------|------|------|------|------|
| 0.71 | 0.72 | 0.72 | 0.72 | 0.75 | 0.72 | 0.74 | 0.74 | 0.74 |
| 0.71 | 0.71 | 0.73 | 0.72 | 0.73 | 0.73 | 0.74 | 0.74 | 0.74 |
| 0.61 | 0.61 | 0.65 | 0.63 | 0.63 | 0.62 | 0.61 | 0.68 | 0.60 |
| 0.45 | 0.36 | 0.44 | 0.47 | 0.49 | 0.47 | 0.48 | 0.53 | 0.45 |
| 0.56 | 0.54 | 0.63 | 0.58 | 0.60 | 0.62 | 0.59 | 0.62 | 0.55 |
| 0.73 | 0.74 | 0.75 | 0.75 | 0.77 | 0.75 | 0.77 | 0.75 | 0.77 |
| 0.77 | 0.77 | 0.77 | 0.77 | 0.79 | 0.78 | 0.79 | 0.79 | 0.80 |
| 0.69 | 0.70 | 0.69 | 0.66 | 0.74 | 0.69 | 0.70 | 0.70 | 0.71 |
| 0.72 | 0.69 | 0.69 | 0.69 | 0.72 | 0.72 | 0.71 | 0.71 | 0.74 |
| 0.66 | 0.71 | 0.70 | 0.69 | 0.75 | 0.70 | 0.72 | 0.67 | 0.72 |
| 0.66 | 0.67 | 0.72 | 0.67 | 0.68 | 0.68 | 0.68 | 0.70 | 0.67 |
| 0.34 | 0.35 | 0.43 | 0.42 | 0.42 | 0.35 | 0.50 | 0.46 | 0.37 |
| 0.74 | 0.73 | 0.74 | 0.73 | 0.78 | 0.75 | 0.77 | 0.75 | 0.77 |
| 0.81 | 0.82 | 0.82 | 0.82 | 0.84 | 0.82 | 0.84 | 0.84 | 0.84 |
| 0.62 | 0.66 | 0.70 | 0.62 | 0.68 | 0.69 | 0.69 | 0.69 | 0.64 |
| 0.56 | 0.64 | 0.65 | 0.63 | 0.67 | 0.68 | 0.64 | 0.70 | 0.65 |
| 0.79 | 0.81 | 0.79 | 0.81 | 0.83 | 0.81 | 0.82 | 0.80 | 0.81 |
| 0.73 | 0.68 | 0.70 | 0.72 | 0.78 | 0.75 | 0.78 | 0.71 | 0.75 |
| 0.74 | 0.76 | 0.79 | 0.76 | 0.78 | 0.78 | 0.75 | 0.81 | 0.76 |
| 0.82 | 0.84 | 0.83 | 0.82 | 0.85 | 0.83 | 0.84 | 0.85 | 0.85 |
| 0.81 | 0.80 | 0.82 | 0.82 | 0.83 | 0.82 | 0.84 | 0.84 | 0.84 |
| 0.81 | 0.81 | 0.81 | 0.82 | 0.85 | 0.82 | 0.83 | 0.84 | 0.83 |
| 0.38 | 0.42 | 0.48 | 0.36 | 0.46 | 0.36 | 0.31 | 0.42 | 0.42 |
| 0.71 | 0.75 | 0.72 | 0.74 | 0.76 | 0.74 | 0.74 | 0.76 | 0.72 |
| 0.74 | 0.73 | 0.77 | 0.70 | 0.80 | 0.78 | 0.78 | 0.76 | 0.79 |
| 0.83 | 0.83 | 0.82 | 0.85 | 0.85 | 0.84 | 0.86 | 0.87 | 0.86 |
| 0.87 | 0.88 | 0.88 | 0.88 | 0.89 | 0.89 | 0.89 | 0.89 | 0.89 |
| 0.72 | 0.72 | 0.75 | 0.72 | 0.76 | 0.71 | 0.69 | 0.77 | 0.73 |
| 0.71 | 0.65 | 0.68 | 0.72 | 0.79 | 0.70 | 0.76 | 0.70 | 0.75 |
| 0.77 | 0.78 | 0.79 | 0.75 | 0.83 | 0.75 | 0.79 | 0.74 | 0.81 |
| 0.75 | 0.71 | 0.76 | 0.69 | 0.77 | 0.78 | 0.71 | 0.72 | 0.73 |
| 0.83 | 0.84 | 0.84 | 0.81 | 0.88 | 0.84 | 0.85 | 0.85 | 0.86 |
| 0.65 | 0.62 | 0.61 | 0.59 | 0.73 | 0.65 | 0.66 | 0.69 | 0.63 |
| 0.79 | 0.81 | 0.81 | 0.79 | 0.83 | 0.80 | 0.79 | 0.83 | 0.83 |

|    |      |      |      |      |      |      |      |      |      |
|----|------|------|------|------|------|------|------|------|------|
| 1  |      |      |      |      |      |      |      |      |      |
| 2  | 0.70 | 0.78 | 0.77 | 0.77 | 0.85 | 0.75 | 0.79 | 0.79 | 0.74 |
| 3  | 0.76 | 0.77 | 0.79 | 0.79 | 0.83 | 0.79 | 0.77 | 0.80 | 0.72 |
| 4  | 0.79 | 0.75 | 0.79 | 0.79 | 0.81 | 0.75 | 0.79 | 0.83 | 0.81 |
| 5  | 0.67 | 0.68 | 0.63 | 0.60 | 0.71 | 0.68 | 0.62 | 0.65 | 0.65 |
| 6  | 0.88 | 0.87 | 0.90 | 0.88 | 0.89 | 0.89 | 0.88 | 0.91 | 0.89 |
| 7  | 0.88 | 0.88 | 0.88 | 0.89 | 0.89 | 0.87 | 0.89 | 0.90 | 0.90 |
| 8  | 0.84 | 0.88 | 0.88 | 0.82 | 0.90 | 0.88 | 0.88 | 0.85 | 0.86 |
| 9  | 0.80 | 0.87 | 0.87 | 0.85 | 0.90 | 0.87 | 0.89 | 0.89 | 0.87 |
| 10 | 0.89 | 0.89 | 0.88 | 0.89 | 0.92 | 0.89 | 0.91 | 0.90 | 0.90 |
| 11 | 0.91 | 0.92 | 0.93 | 0.92 | 0.93 | 0.89 | 0.92 | 0.94 | 0.92 |
| 12 | 0.65 | 0.80 | 0.80 | 0.65 | 0.76 | 0.78 | 0.70 | 0.71 | 0.75 |
| 13 | 0.70 | 0.80 | 0.74 | 0.70 | 0.79 | 0.72 | 0.80 | 0.68 | 0.62 |
| 14 | 0.87 | 0.87 | 0.87 | 0.87 | 0.86 | 0.86 | 0.87 | 0.82 | 0.92 |
| 15 | 0.90 | 0.90 | 0.91 | 0.90 | 0.93 | 0.88 | 0.90 | 0.87 | 0.92 |
| 16 | 0.91 | 0.93 | 0.94 | 0.91 | 0.93 | 0.93 | 0.92 | 0.94 | 0.92 |
| 17 | 0.96 | 0.96 | 0.96 | 0.96 | 0.97 | 0.96 | 0.96 | 0.96 | 0.96 |
| 18 | 0.97 | 0.97 | 0.97 | 0.97 | 0.97 | 0.97 | 0.97 | 0.98 | 0.97 |
| 19 |      |      |      |      |      |      |      |      |      |
| 20 |      |      |      |      |      |      |      |      |      |
| 21 |      |      |      |      |      |      |      |      |      |
| 22 |      |      |      |      |      |      |      |      |      |
| 23 |      |      |      |      |      |      |      |      |      |
| 24 |      |      |      |      |      |      |      |      |      |
| 25 |      |      |      |      |      |      |      |      |      |
| 26 |      |      |      |      |      |      |      |      |      |
| 27 |      |      |      |      |      |      |      |      |      |
| 28 |      |      |      |      |      |      |      |      |      |
| 29 |      |      |      |      |      |      |      |      |      |
| 30 |      |      |      |      |      |      |      |      |      |
| 31 |      |      |      |      |      |      |      |      |      |
| 32 |      |      |      |      |      |      |      |      |      |
| 33 |      |      |      |      |      |      |      |      |      |
| 34 |      |      |      |      |      |      |      |      |      |
| 35 |      |      |      |      |      |      |      |      |      |
| 36 |      |      |      |      |      |      |      |      |      |
| 37 |      |      |      |      |      |      |      |      |      |
| 38 |      |      |      |      |      |      |      |      |      |
| 39 |      |      |      |      |      |      |      |      |      |
| 40 |      |      |      |      |      |      |      |      |      |
| 41 |      |      |      |      |      |      |      |      |      |
| 42 |      |      |      |      |      |      |      |      |      |
| 43 |      |      |      |      |      |      |      |      |      |
| 44 |      |      |      |      |      |      |      |      |      |
| 45 |      |      |      |      |      |      |      |      |      |
| 46 |      |      |      |      |      |      |      |      |      |
| 47 |      |      |      |      |      |      |      |      |      |
| 48 |      |      |      |      |      |      |      |      |      |
| 49 |      |      |      |      |      |      |      |      |      |
| 50 |      |      |      |      |      |      |      |      |      |
| 51 |      |      |      |      |      |      |      |      |      |
| 52 |      |      |      |      |      |      |      |      |      |
| 53 |      |      |      |      |      |      |      |      |      |
| 54 |      |      |      |      |      |      |      |      |      |
| 55 |      |      |      |      |      |      |      |      |      |
| 56 |      |      |      |      |      |      |      |      |      |
| 57 |      |      |      |      |      |      |      |      |      |
| 58 |      |      |      |      |      |      |      |      |      |
| 59 |      |      |      |      |      |      |      |      |      |
| 60 |      |      |      |      |      |      |      |      |      |

1  
2  
3  
4  
5  
6  
7  
8  
9  
10  
11  
12  
13  
14  
15  
16  
17  
18  
19  
20  
21  
22  
23  
24  
25  
26  
27  
28  
29  
30  
31  
32  
33  
34  
35  
36  
37  
38  
39  
40  
41  
42  
43  
44  
45  
46  
47  
48  
49  
50  
51  
52  
53  
54  
55  
56  
57  
58  
59  
60

976 982 992 1024 1053 1056 1062 1067 1225

| RWF  | RJE  | RGT  | RWA  | RJ1  | RRV  | RH8  | RVV  | RM1  |
|------|------|------|------|------|------|------|------|------|
| 0.74 | 0.74 | 0.74 | 0.75 | 0.76 | 0.78 | 0.74 | 0.75 | 0.76 |
| 0.73 | 0.76 | 0.75 | 0.76 | 0.76 | 0.75 | 0.74 | 0.76 | 0.78 |
| 0.57 | 0.65 | 0.66 | 0.69 | 0.65 | 0.67 | 0.63 | 0.62 | 0.66 |
| 0.52 | 0.50 | 0.49 | 0.50 | 0.50 | 0.44 | 0.48 | 0.46 | 0.51 |
| 0.54 | 0.60 | 0.59 | 0.64 | 0.62 | 0.63 | 0.57 | 0.64 | 0.66 |
| 0.75 | 0.77 | 0.77 | 0.77 | 0.78 | 0.80 | 0.77 | 0.79 | 0.81 |
| 0.80 | 0.80 | 0.80 | 0.80 | 0.81 | 0.81 | 0.80 | 0.81 | 0.83 |
| 0.72 | 0.70 | 0.73 | 0.71 | 0.74 | 0.76 | 0.71 | 0.74 | 0.76 |
| 0.70 | 0.71 | 0.75 | 0.73 | 0.75 | 0.77 | 0.74 | 0.71 | 0.76 |
| 0.71 | 0.71 | 0.70 | 0.72 | 0.73 | 0.76 | 0.70 | 0.75 | 0.75 |
| 0.65 | 0.71 | 0.70 | 0.71 | 0.70 | 0.71 | 0.66 | 0.69 | 0.72 |
| 0.42 | 0.43 | 0.51 | 0.41 | 0.44 | 0.44 | 0.47 | 0.42 | 0.47 |
| 0.75 | 0.77 | 0.77 | 0.78 | 0.80 | 0.79 | 0.75 | 0.80 | 0.79 |
| 0.84 | 0.84 | 0.84 | 0.84 | 0.85 | 0.85 | 0.84 | 0.86 | 0.87 |
| 0.64 | 0.67 | 0.70 | 0.69 | 0.70 | 0.71 | 0.67 | 0.70 | 0.68 |
| 0.53 | 0.66 | 0.63 | 0.68 | 0.65 | 0.70 | 0.61 | 0.68 | 0.67 |
| 0.80 | 0.83 | 0.81 | 0.83 | 0.83 | 0.84 | 0.81 | 0.84 | 0.85 |
| 0.77 | 0.78 | 0.74 | 0.76 | 0.77 | 0.77 | 0.74 | 0.77 | 0.79 |
| 0.72 | 0.77 | 0.80 | 0.81 | 0.78 | 0.80 | 0.74 | 0.77 | 0.81 |
| 0.85 | 0.84 | 0.85 | 0.86 | 0.86 | 0.87 | 0.84 | 0.86 | 0.87 |
| 0.84 | 0.85 | 0.84 | 0.83 | 0.86 | 0.85 | 0.84 | 0.85 | 0.86 |
| 0.83 | 0.84 | 0.83 | 0.83 | 0.85 | 0.86 | 0.82 | 0.85 | 0.86 |
| 0.34 | 0.45 | 0.46 | 0.50 | 0.37 | 0.50 | 0.27 | 0.53 | 0.47 |
| 0.71 | 0.76 | 0.75 | 0.77 | 0.75 | 0.77 | 0.71 | 0.73 | 0.76 |
| 0.72 | 0.75 | 0.74 | 0.79 | 0.74 | 0.81 | 0.72 | 0.82 | 0.81 |
| 0.86 | 0.88 | 0.85 | 0.87 | 0.87 | 0.87 | 0.86 | 0.86 | 0.88 |
| 0.89 | 0.89 | 0.89 | 0.90 | 0.90 | 0.90 | 0.89 | 0.90 | 0.91 |
| 0.64 | 0.76 | 0.75 | 0.77 | 0.77 | 0.78 | 0.69 | 0.74 | 0.78 |
| 0.75 | 0.76 | 0.75 | 0.75 | 0.73 | 0.75 | 0.72 | 0.78 | 0.78 |
| 0.80 | 0.81 | 0.80 | 0.80 | 0.82 | 0.82 | 0.72 | 0.82 | 0.82 |
| 0.72 | 0.78 | 0.76 | 0.77 | 0.71 | 0.77 | 0.75 | 0.73 | 0.77 |
| 0.84 | 0.85 | 0.85 | 0.87 | 0.87 | 0.90 | 0.84 | 0.87 | 0.88 |
| 0.63 | 0.68 | 0.64 | 0.76 | 0.69 | 0.66 | 0.58 | 0.75 | 0.73 |
| 0.78 | 0.82 | 0.81 | 0.85 | 0.84 | 0.84 | 0.80 | 0.82 | 0.82 |

|    |      |      |      |      |      |      |      |      |      |
|----|------|------|------|------|------|------|------|------|------|
| 1  |      |      |      |      |      |      |      |      |      |
| 2  | 0.75 | 0.81 | 0.76 | 0.76 | 0.83 | 0.83 | 0.74 | 0.80 | 0.82 |
| 3  | 0.77 | 0.77 | 0.79 | 0.76 | 0.83 | 0.84 | 0.74 | 0.81 | 0.82 |
| 4  | 0.76 | 0.82 | 0.79 | 0.79 | 0.85 | 0.82 | 0.80 | 0.80 | 0.82 |
| 5  | 0.64 | 0.70 | 0.64 | 0.66 | 0.63 | 0.73 | 0.56 | 0.69 | 0.71 |
| 6  | 0.85 | 0.90 | 0.90 | 0.92 | 0.88 | 0.90 | 0.87 | 0.89 | 0.91 |
| 7  | 0.88 | 0.92 | 0.89 | 0.89 | 0.91 | 0.91 | 0.90 | 0.91 | 0.91 |
| 8  | 0.87 | 0.88 | 0.86 | 0.88 | 0.89 | 0.89 | 0.86 | 0.91 | 0.86 |
| 9  | 0.84 | 0.88 | 0.89 | 0.86 | 0.90 | 0.91 | 0.85 | 0.91 | 0.91 |
| 10 | 0.90 | 0.91 | 0.90 | 0.92 | 0.92 | 0.92 | 0.90 | 0.91 | 0.92 |
| 11 | 0.94 | 0.92 | 0.94 | 0.94 | 0.94 | 0.94 | 0.94 | 0.95 | 0.95 |
| 12 | 0.76 | 0.74 | 0.71 | 0.77 | 0.81 | 0.83 | 0.69 | 0.75 | 0.81 |
| 13 | 0.78 | 0.79 | 0.75 | 0.69 | 0.77 | 0.77 | 0.66 | 0.83 | 0.66 |
| 14 | 0.91 | 0.87 | 0.83 | 0.91 | 0.88 | 0.84 | 0.89 | 0.92 | 0.87 |
| 15 | 0.90 | 0.91 | 0.91 | 0.92 | 0.92 | 0.91 | 0.82 | 0.93 | 0.91 |
| 16 | 0.92 | 0.94 | 0.94 | 0.94 | 0.94 | 0.94 | 0.92 | 0.94 | 0.94 |
| 17 | 0.96 | 0.97 | 0.97 | 0.97 | 0.97 | 0.97 | 0.96 | 0.97 | 0.97 |
| 18 | 0.97 | 0.97 | 0.98 | 0.97 | 0.98 | 0.98 | 0.97 | 0.97 | 0.97 |
| 19 |      |      |      |      |      |      |      |      |      |
| 20 |      |      |      |      |      |      |      |      |      |
| 21 |      |      |      |      |      |      |      |      |      |
| 22 |      |      |      |      |      |      |      |      |      |
| 23 |      |      |      |      |      |      |      |      |      |
| 24 |      |      |      |      |      |      |      |      |      |
| 25 |      |      |      |      |      |      |      |      |      |
| 26 |      |      |      |      |      |      |      |      |      |
| 27 |      |      |      |      |      |      |      |      |      |
| 28 |      |      |      |      |      |      |      |      |      |
| 29 |      |      |      |      |      |      |      |      |      |
| 30 |      |      |      |      |      |      |      |      |      |
| 31 |      |      |      |      |      |      |      |      |      |
| 32 |      |      |      |      |      |      |      |      |      |
| 33 |      |      |      |      |      |      |      |      |      |
| 34 |      |      |      |      |      |      |      |      |      |
| 35 |      |      |      |      |      |      |      |      |      |
| 36 |      |      |      |      |      |      |      |      |      |
| 37 |      |      |      |      |      |      |      |      |      |
| 38 |      |      |      |      |      |      |      |      |      |
| 39 |      |      |      |      |      |      |      |      |      |
| 40 |      |      |      |      |      |      |      |      |      |
| 41 |      |      |      |      |      |      |      |      |      |
| 42 |      |      |      |      |      |      |      |      |      |
| 43 |      |      |      |      |      |      |      |      |      |
| 44 |      |      |      |      |      |      |      |      |      |
| 45 |      |      |      |      |      |      |      |      |      |
| 46 |      |      |      |      |      |      |      |      |      |
| 47 |      |      |      |      |      |      |      |      |      |
| 48 |      |      |      |      |      |      |      |      |      |
| 49 |      |      |      |      |      |      |      |      |      |
| 50 |      |      |      |      |      |      |      |      |      |
| 51 |      |      |      |      |      |      |      |      |      |
| 52 |      |      |      |      |      |      |      |      |      |
| 53 |      |      |      |      |      |      |      |      |      |
| 54 |      |      |      |      |      |      |      |      |      |
| 55 |      |      |      |      |      |      |      |      |      |
| 56 |      |      |      |      |      |      |      |      |      |
| 57 |      |      |      |      |      |      |      |      |      |
| 58 |      |      |      |      |      |      |      |      |      |
| 59 |      |      |      |      |      |      |      |      |      |
| 60 |      |      |      |      |      |      |      |      |      |

1  
2  
3  
4  
5  
6  
7  
8  
9  
10  
11  
12  
13  
14  
15  
16  
17  
18  
19  
20  
21  
22  
23  
24  
25  
26  
27  
28  
29  
30  
31  
32  
33  
34  
35  
36  
37  
38  
39  
40  
41  
42  
43  
44  
45  
46  
47  
48  
49  
50  
51  
52  
53  
54  
55  
56  
57  
58  
59  
60

1324 1344 1437 1451 1513 1972

| RTD  | RTE  | RWE  | RTH  | RHQ  | RPY  |
|------|------|------|------|------|------|
| 0.78 | 0.79 | 0.82 | 0.81 | 0.81 | 0.86 |
| 0.79 | 0.80 | 0.81 | 0.80 | 0.82 | 0.85 |
| 0.73 | 0.67 | 0.74 | 0.71 | 0.73 | 0.72 |
| 0.54 | 0.57 | 0.61 | 0.63 | 0.59 | 0.67 |
| 0.67 | 0.63 | 0.68 | 0.68 | 0.69 | 0.64 |
| 0.81 | 0.82 | 0.84 | 0.83 | 0.82 | 0.88 |
| 0.84 | 0.84 | 0.85 | 0.85 | 0.86 | 0.89 |
| 0.75 | 0.77 | 0.81 | 0.80 | 0.81 | 0.86 |
| 0.77 | 0.77 | 0.80 | 0.79 | 0.80 | 0.85 |
| 0.75 | 0.78 | 0.80 | 0.79 | 0.78 | 0.86 |
| 0.73 | 0.72 | 0.79 | 0.75 | 0.77 | 0.73 |
| 0.48 | 0.53 | 0.55 | 0.60 | 0.48 | 0.57 |
| 0.79 | 0.80 | 0.84 | 0.83 | 0.83 | 0.86 |
| 0.87 | 0.87 | 0.89 | 0.88 | 0.89 | 0.91 |
| 0.74 | 0.72 | 0.78 | 0.70 | 0.78 | 0.76 |
| 0.71 | 0.65 | 0.77 | 0.69 | 0.74 | 0.65 |
| 0.83 | 0.86 | 0.88 | 0.86 | 0.87 | 0.90 |
| 0.76 | 0.82 | 0.83 | 0.79 | 0.81 | 0.86 |
| 0.82 | 0.81 | 0.85 | 0.83 | 0.83 | 0.81 |
| 0.88 | 0.89 | 0.90 | 0.88 | 0.90 | 0.92 |
| 0.88 | 0.87 | 0.90 | 0.88 | 0.89 | 0.92 |
| 0.87 | 0.87 | 0.89 | 0.88 | 0.89 | 0.91 |
| 0.56 | 0.41 | 0.54 | 0.54 | 0.44 | 0.43 |
| 0.74 | 0.75 | 0.84 | 0.78 | 0.80 | 0.78 |
| 0.81 | 0.81 | 0.86 | 0.83 | 0.81 | 0.84 |
| 0.89 | 0.87 | 0.89 | 0.90 | 0.91 | 0.91 |
| 0.91 | 0.92 | 0.92 | 0.92 | 0.93 | 0.95 |
| 0.79 | 0.71 | 0.83 | 0.79 | 0.82 | 0.74 |
| 0.72 | 0.79 | 0.83 | 0.78 | 0.77 | 0.83 |
| 0.83 | 0.83 | 0.87 | 0.83 | 0.85 | 0.90 |
| 0.81 | 0.79 | 0.83 | 0.77 | 0.80 | 0.78 |
| 0.89 | 0.89 | 0.90 | 0.90 | 0.90 | 0.94 |
| 0.67 | 0.72 | 0.77 | 0.76 | 0.76 | 0.68 |
| 0.85 | 0.83 | 0.89 | 0.86 | 0.87 | 0.85 |

|    |      |      |      |      |      |      |
|----|------|------|------|------|------|------|
| 1  |      |      |      |      |      |      |
| 2  | 0.83 | 0.81 | 0.85 | 0.82 | 0.85 | 0.90 |
| 3  | 0.84 | 0.82 | 0.86 | 0.86 | 0.86 | 0.90 |
| 4  | 0.87 | 0.83 | 0.87 | 0.84 | 0.88 | 0.88 |
| 5  | 0.74 | 0.74 | 0.76 | 0.69 | 0.70 | 0.62 |
| 6  | 0.92 | 0.91 | 0.93 | 0.91 | 0.92 | 0.90 |
| 7  | 0.93 | 0.92 | 0.93 | 0.92 | 0.94 | 0.95 |
| 8  | 0.90 | 0.90 | 0.92 | 0.92 | 0.91 | 0.92 |
| 9  | 0.88 | 0.90 | 0.90 | 0.91 | 0.91 | 0.95 |
| 10 | 0.93 | 0.92 | 0.94 | 0.92 | 0.94 | 0.95 |
| 11 | 0.95 | 0.95 | 0.95 | 0.96 | 0.96 | 0.96 |
| 12 | 0.76 | 0.85 | 0.75 | 0.81 | 0.86 | 0.82 |
| 13 | 0.76 | 0.76 | 0.85 | 0.81 | 0.86 | 0.85 |
| 14 | 0.92 | 0.94 | 0.93 | 0.93 | 0.91 | 0.91 |
| 15 | 0.94 | 0.92 | 0.95 | 0.92 | 0.93 | 0.96 |
| 16 | 0.94 | 0.93 | 0.95 | 0.95 | 0.96 | 0.96 |
| 17 | 0.97 | 0.98 | 0.98 | 0.98 | 0.98 | 0.98 |
| 18 | 0.98 | 0.98 | 0.98 | 0.98 | 0.98 | 0.99 |
| 19 |      |      |      |      |      |      |
| 20 |      |      |      |      |      |      |
| 21 |      |      |      |      |      |      |
| 22 |      |      |      |      |      |      |
| 23 |      |      |      |      |      |      |
| 24 |      |      |      |      |      |      |
| 25 |      |      |      |      |      |      |
| 26 |      |      |      |      |      |      |
| 27 |      |      |      |      |      |      |
| 28 |      |      |      |      |      |      |
| 29 |      |      |      |      |      |      |
| 30 |      |      |      |      |      |      |
| 31 |      |      |      |      |      |      |
| 32 |      |      |      |      |      |      |
| 33 |      |      |      |      |      |      |
| 34 |      |      |      |      |      |      |
| 35 |      |      |      |      |      |      |
| 36 |      |      |      |      |      |      |
| 37 |      |      |      |      |      |      |
| 38 |      |      |      |      |      |      |
| 39 |      |      |      |      |      |      |
| 40 |      |      |      |      |      |      |
| 41 |      |      |      |      |      |      |
| 42 |      |      |      |      |      |      |
| 43 |      |      |      |      |      |      |
| 44 |      |      |      |      |      |      |
| 45 |      |      |      |      |      |      |
| 46 |      |      |      |      |      |      |
| 47 |      |      |      |      |      |      |
| 48 |      |      |      |      |      |      |
| 49 |      |      |      |      |      |      |
| 50 |      |      |      |      |      |      |
| 51 |      |      |      |      |      |      |
| 52 |      |      |      |      |      |      |
| 53 |      |      |      |      |      |      |
| 54 |      |      |      |      |      |      |
| 55 |      |      |      |      |      |      |
| 56 |      |      |      |      |      |      |
| 57 |      |      |      |      |      |      |
| 58 |      |      |      |      |      |      |
| 59 |      |      |      |      |      |      |
| 60 |      |      |      |      |      |      |

STROBE Statement—Checklist of items that should be included in reports of *cross-sectional studies*

|                              | Item No                                                                            | Recommendation                                                                                                                                                                                               | Page No |
|------------------------------|------------------------------------------------------------------------------------|--------------------------------------------------------------------------------------------------------------------------------------------------------------------------------------------------------------|---------|
| <b>Title and abstract</b>    | 1                                                                                  | (a) Indicate the study's design with a commonly used term in the title or the abstract                                                                                                                       | 1       |
|                              |                                                                                    | (b) Provide in the abstract an informative and balanced summary of what was done and what was found                                                                                                          | 2       |
| <b>Introduction</b>          |                                                                                    |                                                                                                                                                                                                              |         |
| Background/rationale         | 2                                                                                  | Explain the scientific background and rationale for the investigation being reported                                                                                                                         | 3,4     |
| Objectives                   | 3                                                                                  | State specific objectives, including any prespecified hypotheses                                                                                                                                             | 2,4     |
| <b>Methods</b>               |                                                                                    |                                                                                                                                                                                                              |         |
| Study design                 | 4                                                                                  | Present key elements of study design early in the paper                                                                                                                                                      | 4,5     |
| Setting                      | 5                                                                                  | Describe the setting, locations, and relevant dates, including periods of recruitment, exposure, follow-up, and data collection                                                                              | 4       |
| Participants                 | 6                                                                                  | (a) Give the eligibility criteria, and the sources and methods of selection of participants                                                                                                                  | 4       |
| Variables                    | 7                                                                                  | Clearly define all outcomes, exposures, predictors, potential confounders, and effect modifiers. Give diagnostic criteria, if applicable                                                                     | 4,5     |
| Data sources/<br>measurement | 8*                                                                                 | For each variable of interest, give sources of data and details of methods of assessment (measurement). Describe comparability of assessment methods if there is more than one group                         | 4       |
| Bias                         | 9                                                                                  | Describe any efforts to address potential sources of bias                                                                                                                                                    | NA      |
| Study size                   | 10                                                                                 | Explain how the study size was arrived at                                                                                                                                                                    | 4,5     |
| Quantitative variables       | 11                                                                                 | Explain how quantitative variables were handled in the analyses. If applicable, describe which groupings were chosen and why                                                                                 | 4       |
| Statistical methods          | 12                                                                                 | (a) Describe all statistical methods, including those used to control for confounding                                                                                                                        | 4,5     |
|                              |                                                                                    | (b) Describe any methods used to examine subgroups and interactions                                                                                                                                          | NA      |
|                              | (c) Explain how missing data were addressed                                        | 5                                                                                                                                                                                                            |         |
|                              | (d) If applicable, describe analytical methods taking account of sampling strategy | 5                                                                                                                                                                                                            |         |
|                              | (e) Describe any sensitivity analyses                                              | NA                                                                                                                                                                                                           |         |
| <b>Results</b>               |                                                                                    |                                                                                                                                                                                                              |         |
| Participants                 | 13*                                                                                | (a) Report numbers of individuals at each stage of study—eg numbers potentially eligible, examined for eligibility, confirmed eligible, included in the study, completing follow-up, and analysed            | 5       |
|                              |                                                                                    | (b) Give reasons for non-participation at each stage                                                                                                                                                         | 5       |
|                              |                                                                                    | (c) Consider use of a flow diagram                                                                                                                                                                           | NA      |
| Descriptive data             | 14*                                                                                | (a) Give characteristics of study participants (eg demographic, clinical, social) and information on exposures and potential confounders                                                                     | 5,6     |
|                              |                                                                                    | (b) Indicate number of participants with missing data for each variable of interest                                                                                                                          | 5,6     |
| Outcome data                 | 15*                                                                                | Report numbers of outcome events or summary measures                                                                                                                                                         | 6       |
| Main results                 | 16                                                                                 | (a) Give unadjusted estimates and, if applicable, confounder-adjusted estimates and their precision (eg, 95% confidence interval). Make clear which confounders were adjusted for and why they were included | 6       |

|                          |    |                                                                                                                                                                            |     |
|--------------------------|----|----------------------------------------------------------------------------------------------------------------------------------------------------------------------------|-----|
|                          |    | (b) Report category boundaries when continuous variables were categorized                                                                                                  | NA  |
|                          |    | (c) If relevant, consider translating estimates of relative risk into absolute risk for a meaningful time period                                                           | NA  |
| Other analyses           | 17 | Report other analyses done—eg analyses of subgroups and interactions, and sensitivity analyses                                                                             | NA  |
| <b>Discussion</b>        |    |                                                                                                                                                                            |     |
| Key results              | 18 | Summarise key results with reference to study objectives                                                                                                                   | 6   |
| Limitations              | 19 | Discuss limitations of the study, taking into account sources of potential bias or imprecision. Discuss both direction and magnitude of any potential bias                 | 7   |
| Interpretation           | 20 | Give a cautious overall interpretation of results considering objectives, limitations, multiplicity of analyses, results from similar studies, and other relevant evidence | 7,8 |
| Generalisability         | 21 | Discuss the generalisability (external validity) of the study results                                                                                                      | 8   |
| <b>Other information</b> |    |                                                                                                                                                                            |     |
| Funding                  | 22 | Give the source of funding and the role of the funders for the present study and, if applicable, for the original study on which the present article is based              | 1   |

\*Give information separately for exposed and unexposed groups.

**Note:** An Explanation and Elaboration article discusses each checklist item and gives methodological background and published examples of transparent reporting. The STROBE checklist is best used in conjunction with this article (freely available on the Web sites of PLoS Medicine at <http://www.plosmedicine.org/>, Annals of Internal Medicine at <http://www.annals.org/>, and Epidemiology at <http://www.epidem.com/>). Information on the STROBE Initiative is available at [www.strobe-statement.org](http://www.strobe-statement.org).



# BMJ Open

## The reliability of hospital scores for the Cancer Patient Experience Survey: analysis of publicly reported patient survey data

|                                 |                                                                                                                                                                                                                                                                                                                                                                                                                                      |
|---------------------------------|--------------------------------------------------------------------------------------------------------------------------------------------------------------------------------------------------------------------------------------------------------------------------------------------------------------------------------------------------------------------------------------------------------------------------------------|
| Journal:                        | <i>BMJ Open</i>                                                                                                                                                                                                                                                                                                                                                                                                                      |
| Manuscript ID                   | bmjopen-2019-029037.R1                                                                                                                                                                                                                                                                                                                                                                                                               |
| Article Type:                   | Research                                                                                                                                                                                                                                                                                                                                                                                                                             |
| Date Submitted by the Author:   | 11-Apr-2019                                                                                                                                                                                                                                                                                                                                                                                                                          |
| Complete List of Authors:       | Abel, Gary; University of Exeter, University of Exeter Medical School (Primary Care)<br>Gomez-Cano, Mayam; University of Exeter - Saint Lukes Campus<br>Pham, Tra My; University College London , Behavioural Science and Health; University College London, Primary Care and Population Health<br>Lyratzopoulos, Georgios ; University College London, Department of Epidemiology & Public Health, Health Behaviour Research Centre |
| <b>Primary Subject Heading</b>: | Health services research                                                                                                                                                                                                                                                                                                                                                                                                             |
| Secondary Subject Heading:      | Oncology                                                                                                                                                                                                                                                                                                                                                                                                                             |
| Keywords:                       | ONCOLOGY, Quality Improvement, Medical Management, Health service research, Patients, Health policy < HEALTH SERVICES ADMINISTRATION & MANAGEMENT                                                                                                                                                                                                                                                                                    |
|                                 |                                                                                                                                                                                                                                                                                                                                                                                                                                      |

SCHOLARONE™  
Manuscripts

# The reliability of hospital scores for the Cancer Patient Experience Survey: analysis of publicly reported patient survey data

Gary A Abel, Mayam Gomez-Cano, Tra My Pham, Georgios Lyratzopoulos

Gary A Abel, Senior Lecturer, University of Exeter Medical School, [g.a.abel@exeter.ac.uk](mailto:g.a.abel@exeter.ac.uk)

Mayam Gomez-Cano, Postdoctoral Research Associate, University of Exeter Medical

School, [m.c.gomez-cano@exeter.ac.uk](mailto:m.c.gomez-cano@exeter.ac.uk)

Tra My Pham, Research Associate, University College London, [tra.pham.09@ucl.ac.uk](mailto:tra.pham.09@ucl.ac.uk)

Georgios Lyratzopoulos, Professor of Cancer Epidemiology, University College London,

[y.lyratzopoulos@ucl.ac.uk](mailto:y.lyratzopoulos@ucl.ac.uk)

Corresponding Author

Gary A Abel

University of Exeter Medical School (Primary Care)

Smeall Building

St Luke's Campus

Exeter

EX1 2LU

UK

[g.a.abel@exeter.ac.uk](mailto:g.a.abel@exeter.ac.uk)

## Declarations.

**Competing Interests.** The authors report grants from MacMillan Cancer Support, during the conduct of the study. GA and GL have acted as academic consultants providing methodological advice to NHS England Insight team regarding the Cancer Patient Experience Survey.

**Funding.** This research was funded by Macmillan Cancer Support (grant number 5995414). GL is funded by a Cancer Research UK Advanced Clinician Scientist Fellowship award (grant number C18081/A18180). The work presented here represents that of the authors and does not necessarily represent those of the funding organisations.

**Ethical Approval.** This study is entirely based on publically available data and so ethical approval is not required. The actual survey was conducted by the survey providers after obtaining section 251 approval of the NHS Act 2006 and Health Service (Control of Patient Information) Regulations 2002.

**Guarantor.** GA is guarantor for this paper

**Contributorship.** GA and GL conceived and designed the study. GA developed the methodological framework. MGC performed the analysis. All authors (GA, MGC, TMP, GL) contributed to the interpretation of findings and the drafting of the manuscript.

1  
2  
3 **Acknowledgments.** We thank the NHS England as commissioner of the 2016 Cancer Patient  
4 Experience Survey, Quality Health as data collector and publisher of the dataset, all NHS  
5 Acute Trusts in England for provision of data samples, and all patients who responded to the  
6 survey.  
7

8  
9 **Data sharing statement.** This study is based entirely on publically available data which can  
10 be found at <http://www.ncpes.co.uk/reports/2016-reports/local-reports-1/data-tables-1>  
11

12 The Corresponding Author has the right to grant on behalf of all authors and does grant on  
13 behalf of all authors, a worldwide licence  
14 ([http://www.bmj.com/sites/default/files/BMJ%20Author%20Licence%20March%202013.do](http://www.bmj.com/sites/default/files/BMJ%20Author%20Licence%20March%202013.doc)  
15 c) to the Publishers and its licensees in perpetuity, in all forms, formats and media (whether  
16 known now or created in the future), to i) publish, reproduce, distribute, display and store the  
17 Contribution, ii) translate the Contribution into other languages, create adaptations, reprints,  
18 include within collections and create summaries, extracts and/or, abstracts of the Contribution  
19 and convert or allow conversion into any format including without limitation audio, iii) create  
20 any other derivative work(s) based in whole or part on the on the Contribution, iv) to exploit  
21 all subsidiary rights to exploit all subsidiary rights that currently exist or as may exist in the  
22 future in the Contribution, v) the inclusion of electronic links from the Contribution to third  
23 party material where-ever it may be located; and, vi) licence any third party to do any or all  
24 of the above.  
25  
26  
27  
28

## 29 **Abstract**

30 **Objectives** To assess the degree to which variations in publicly reported hospital scores  
31 arising from the English Cancer Patient Experience Survey (CPES) are subject to chance.  
32  
33

34 **Design** Secondary analysis of publically reported data.  
35

36 **Setting** English National Health Service hospitals  
37

38 **Participants** 72,756 patients who were recently treated for cancer in one of 146 hospitals and  
39 responded to the 2016 English Cancer Patient Experience Survey  
40

41 **Main outcome measures** Spearman-Brown reliability of hospital scores on 51 evaluative  
42 questions regarding cancer care.  
43

44 **Results** Hospitals varied in respondent sample size with a median hospital sample size of 419  
45 responses (range 31 - 1972). There were some hospitals with generally highly reliable scores  
46 across most questions, whereas other hospitals had generally unreliable scores (the median  
47 reliability of question scores within individual hospitals varied between 0.11 and 0.86).  
48 Similarly, there were some questions with generally high reliability across most hospitals  
49 whereas other questions had generally low reliability. Of the 7,377 individual hospital scores  
50 publically reported (146 hospitals by 51 questions, minus 69 suppressed scores), only 34%  
51 reached a reliability of 0.7, the minimum generally considered to be useful. In order for 80%  
52 of the individual hospital scores to reach a reliability of 0.7, some hospitals would require a  
53 four-fold increase in number of respondents; although in a few other hospitals sample sizes  
54 could be reduced.  
55  
56  
57  
58  
59  
60

1  
2  
3 **Conclusions** The English Patient Experience Survey represents a globally unique source for  
4 understanding cancer patient experience, but in its present form it is not reliable for high  
5 stakes comparisons of the performance of different hospitals. Revised sampling strategies and  
6 survey questions could help increase the reliability of hospital scores, and thus make the  
7 survey fit for use in performance comparisons.  
8  
9

### 10 **Strengths and limitations of this study**

11  
12  
13

- 14 • Although there are thousands of healthcare quality indicators in current use, most are  
15 bereft of any evaluation of their statistical reliability. This paper addresses this lack of  
16 evidence for a globally unique patient experience survey.
- 17 • By making use of the actual data used in public reporting of a high profile survey with  
18 a high response rate we are able make direct inferences about the quality indicators  
19 under consideration.
- 20 • By understanding the different reasons behind hospital scores lacking in reliability we  
21 are able to suggest ways of increasing the reliability of the survey scores.
- 22 • This study only considers the crude hospital scores and not those adjusted for patient  
23 case-mix which have recently been reported. However, as we expect any such  
24 adjustment to result in lower reliabilities the conclusions of the study remain valid.  
25  
26  
27  
28  
29  
30  
31  
32  
33  
34  
35  
36  
37  
38  
39  
40  
41  
42  
43  
44  
45  
46  
47  
48  
49  
50  
51  
52  
53  
54  
55  
56  
57  
58  
59  
60

## Introduction

‘Before you can improve it you first have to measure it’ is a common adage of the quality improvement movement across the world<sup>1</sup>. Coupled with a tendency towards greater public accountability, this maxim has led to an ever-increasing number of measurement initiatives, typically underpinned by public reporting of scores of healthcare organisations.<sup>2, 3</sup>

Together with patient safety and clinical effectiveness, patient experience is being increasingly accepted as a distinct dimension of care quality<sup>4</sup>. Relatedly, policy-makers regularly commission large scale nationwide patient surveys in the US and the UK.<sup>5-7</sup> Most such surveys are aimed at patients with diverse a range of conditions. However, a repeatable disease-specific survey for cancer patients was launched in England in 2010, and its findings are reported publicly and used by healthcare improvement teams in constructing and evaluating action plans.

The statistical reliability of measures of care quality remains a concern, as often the sample sizes involved in organisational comparisons are small. Ideally, measurement initiatives should follow prior examination of the statistical properties of indicators, but this is rarely the case. Some previous UK work has examined the reliability of indicators of stage at diagnosis, diagnostic activity, general practice patient experience and general practice high risk prescribing, on the whole providing cautionary findings indicating the risk of unreliability of organisational rankings.<sup>8-12</sup> Similar approaches and findings have been reported from the US and Dutch settings.<sup>13-19</sup>

These considerations highlight the need for examining the reliability of hospital scores for the Cancer Patient Experience survey, and have motivated us to examine this question empirically in this study. Its aim was to provide a detailed profile of the statistical reliability (and therefore of the role of chance) in hospital scores derived from the Cancer Patient Experience Survey.

## Methods

Data were analysed relating to respondents to the 2016 National Cancer Patient Experience Survey. The (English) National Cancer Patient Experience Survey 2016 survey questionnaire is the sixth iteration of the survey first undertaken in 2010. It includes many evaluative questions covering the experience of diagnosis, diagnostic testing, shared-decision-making, specialist nursing, inpatient care, anti-cancer treatment (surgery, radiotherapy, chemotherapy), hospital discharge and care in the community, together with an overall item for overall satisfaction with care. Survey results are reported publicly for each English hospital to drive local quality improvements, to assist commissioners and providers of cancer care; and to inform the work of the various charities and stakeholder groups supporting cancer patients. The survey was mailed to all adult patients (aged 16 and over) discharged from a National Health Service hospital after inpatient or a day case cancer-related treatment during April-June 2016 after vital status checks at survey mail-out (between 3-5 months after the sampling period).

Respondents comprised patients aged 16 years and above who were treated for cancer in English National Health Service (NHS) hospitals during April-June 2016. The patients had relevant ICD10 codes for cancer (C00-99 excluding C44 and C84, and D05) and were not known to have died prior to the survey mail out. Questionnaires were sent by post and responses could be made by post, online or using a telephone translation service. Details of the survey and method of administration have been published previously<sup>20</sup>. In this study we make use of publically reported hospital level data<sup>21</sup>.

Survey questions have up to 7 response options which are dichotomised for public reporting such that hospitals scores represent the percentage of patients reporting a positive experience for each question. Scores are produced for hospital trusts and Clinical Commissioning Groups (CCG). Further details are given in the Technical Documentation <sup>22</sup>.

We calculated the Spearman-Brown (inter-unit) reliability of each hospital score. This is equivalent to the proportion of variation in hospital-level mean scores (for a given hospital sample size) attributable to the true (underlying) variation between them. Following previous work, we estimated reliability by partitioning the observed variability in hospital scores into two components, variability between hospitals and variability within hospitals, using mixed effects logistic regression models<sup>8, 23</sup>. For each question, a random intercept model (with no fixed effects other than the constant) was used to estimate the between hospital variance on the log-odds scale. This variance is a measure of the true (underlying) variation which can be thought of as that which would be seen with very large sample sizes in each hospital, such that the influence of sampling variation would be minimal <sup>8, 23</sup>. Since our scores are binary measures, the within hospital variance also depends on the level of achievement at each hospital, and can be described by the binomial distribution. In this context, for each question the reliability  $\lambda$  of hospital  $i$  is given by

$$\lambda_i = \frac{\sigma_b^2}{\sigma_b^2 + \frac{1}{p_i(1-p_i)n_i}} \quad 1$$

Where  $\sigma_b^2$  is the true (underlying) between hospital variance on the log-odds scale,  $p_i$  is the observed proportion of patients reporting a positive experience in hospital  $i$  and  $n_i$  is the sample size of hospital  $i$ . High stakes purposes have important consequences for an individual or organisation (i.e. when attached to a financial incentive, publicly reported league tables or an outcome measure in a research study) and therefore require high measure reliability. Reliability can takes values from 0 to 1. Values  $<0.70$  are considered to represent low reliability, whereas values  $\geq 0.90$  represent high reliability, required for 'high-stake' purposes; in-between values are considered to represent adequate reliability.

Where less than 21 responses were received for an individual question for a hospital, results were not publicly reported. Of the 148 hospitals included in the survey there were two hospitals with less than 21 responses for every question. We excluded these two hospitals from our analysis. However there remained 69 suppressed scores (from 18 hospitals) in the publically reported data due to low numbers of respondents to certain questions applicable to only some patients. These scores were excluded from the analysis.

We calculated reliability for every hospital score on each question (a total of 146 hospitals multiplied by 51 questions = 7,446 individual scores, minus 69 suppressed scores = 7,377 individual scores).

1  
2  
3 Additionally, the model outputs were used to estimate the increase in sample size required for  
4 each hospital to reach a reliability of 0.7 for each question<sup>8,23</sup>. We used R version 3.4.4 for  
5 all analyses.  
6

## 7 **Patient involvement**

8  
9  
10 The Cancer Patient Experience Survey development and administration are supported by an  
11 advisory group which includes patient advocates. The present study forms part of a wider  
12 project funded by MacMillan Cancer Support for which there is an advisory group with  
13 patient representative participation.  
14

## 15 **Results**

16  
17 Overall, there were 72,756 respondents to the National Cancer Patient Experience Survey in  
18 2016 (response rate 66%) who were treated at the 146 hospitals included in our analysis. Our  
19 findings are displayed in three figures each comprising a grid of hospitals by questions.  
20 Hospitals are ordered according to the number of responders and questions are ordered  
21 according to the between hospital variance. Hospitals varied in respondent sample size with  
22 a median of 419 responses (range 31 - 1972). Due to different sections of the questionnaire  
23 corresponding to different care pathways, not all questions were applicable to all patients and  
24 so the number of respondents varied considerably for each of the 51 questions. The number  
25 of respondents answering individual questions varied between 15,968 (22%) and 71,773  
26 (99%) with a median of 52,786 (73%). The number of respondents for each question in each  
27 hospital is shown in Figure 1 and supplementary material Table 1.  
28  
29  
30  
31

32 [Insert Figure 1.]  
33

34 The percentage of patients reporting a positive experience was highly variable between  
35 questions and between hospitals (Figure 2 and supplementary material Table 2). The median  
36 percentage of patients reporting positive experience across individual questions was 79%  
37 (range 29% - 96%) while the corresponding median across individual hospitals was 75%  
38 (range 51% - 82%).  
39

40 [Insert Figure 2.]  
41

42 Figure 3 (and supplementary material Table 3) shows the reliability of the score for each  
43 question at each hospital. There were some hospitals with generally high reliability across  
44 most questions, whereas others had generally low reliability across survey items. The median  
45 reliability of question scores within individual hospitals was 0.60 (range 0.11 – 0.86).  
46 Similarly there were some questions with generally high reliability whereas others had  
47 generally low reliability. The median reliability of hospital scores within individual questions  
48 was 0.58 (range 0.21 – 0.93).  
49

50 [Insert Figure 3.]  
51

52 Given that reliability depends on the sample size, the between hospital variance and the  
53 hospital performance, we can examine how these factors influence reliability. Consistent with  
54 this hospitals which tended to have low reliability also had small sample sizes. Also questions  
55 with low reliability tended to be those where the between-hospital variance is low. However,  
56 there are some exceptions to this which can be seen as the horizontal lines composed mostly  
57 of red squares in Figure 3. Some CPES questions are unreliable across all hospitals because  
58  
59  
60

1  
2  
3 they have, across all hospitals, a small number of respondents to that particular question.  
4 Examples include questions only applicable to patients treated by radiotherapy (questions 44  
5 and 45). In general, questions with small sample sizes relate to patients on a particular care  
6 pathway. Other cases of low reliability can be seen in questions for which hospitals  
7 performance is consistently high (questions 5 and 25).  
8  
9

10 Overall the reliability of hospitals scores for the survey is low. Of the 7,377 individual  
11 hospital-question pairs, only 35 % reached a reliability of 0.7, the minimum generally  
12 considered to be useful. As it is possible to improve reliability by increasing the sample size  
13 for a given hospital we calculated how many multiples of the current sample size would be  
14 required to reach a reliability of 0.7 for each question (Figure 4) It would be possible to  
15 increase the percentage of hospital scores reaching a reliability of 0.7 to 60% by doubling the  
16 individual hospital sample size. Further increases lead to smaller gains, though 80% of the  
17 individual hospital scores would have achieved a reliability of 0.7 or more with 4 times as  
18 much data (which represents the upper limit of what could be achieved within a single year of  
19 data collection, though could also be achieved by aggregating over longer time periods).  
20  
21  
22

23 [Insert Figure 4.]  
24  
25  
26

## 27 Discussion

28  
29 In this study we have profiled the reliability of a high-profile national patient experience  
30 survey for cancer patients. Our findings show that about two-thirds of hospital scores in this  
31 survey do not meet reliability levels generally accepted as useful. In practical terms this  
32 means that identification of hospitals that are performing well in specific aspects of care is  
33 hampered due to the influence of chance. The lack of reliability can be attributed to different  
34 factors which have variable influence.  
35  
36

37 Although there are thousands of healthcare quality indicators in current use, most are bereft  
38 of any evaluation of their statistical reliability. Patient experience scores of English general  
39 practices arising from early waves of the GPPS survey were found to have very high  
40 reliability, enabling subsequent reductions in the survey sample.<sup>9, 10</sup> In contrast, the present  
41 study, examining the reliability of CPES hospital scores for the first time, suggests the need  
42 for increases in the survey samples (see below). The present study forms part of an emerging  
43 body of literature examining the reliability of a diverse range of quality indicators, including  
44 from the UK, the US and The Netherlands<sup>8-19, 22, 23</sup>; we would nonetheless like to re-  
45 emphasise the mismatch between the very large number of indicators in current use and the  
46 small number of indicators that have been profiled for their reliability.  
47  
48  
49

50 The key strength of this study is the use of the actual data used in public reporting of a high  
51 profile survey with a high response rate. Its main limitation is that our analysis does not take  
52 into account the influence of patient case-mix. Certain patient groups have systematic  
53 tendencies towards reporting positive experiences compared to others<sup>24, 25</sup> and for this reason  
54 the results of the survey are reported in both adjusted and unadjusted form. Nonetheless, as  
55 patient case-mix explains some of the variability between hospitals<sup>26</sup>, had we calculated the  
56 reliability of case-mix adjusted scores we would have found the reliability would have been  
57 even lower than that presented here.  
58  
59  
60



1  
2  
3 There are some hospitals that have low reliability for most questions as they treat a small  
4 number of patients, meaning that the uncertainty on their scores is inherently high. Further,  
5 there are some questions with low reliability due to limited true (underlying) variation  
6 between hospitals. In such cases, it is very hard to distinguish between hospitals since they  
7 are all performing at a similar level. As a consequence, in the absence of very large sample  
8 sizes, the observed variability between hospitals will be dominated by chance. A particular  
9 example of this phenomenon occurs for questions whose performance is consistently  
10 high/low across hospitals. It is harder to distinguish hospitals when performance is close to  
11 0% or 100%. Lastly, there are other questions with a small number of respondents as they are  
12 applicable to only subsets of patients. In brief the key mechanisms leading to low reliability  
13 are small hospital-level respondent sample, limited variability between hospitals (including  
14 because of ceiling/flooring effects) and small survey-level respondent sample.  
15  
16  
17  
18

19 Given one of the main uses of NCPES is to inform hospital level performance, one might  
20 suggest that in its current form the survey is not fit for one of its main intended purposes  
21 (though it should be noted that the reliability limitations we report do not affect the use of the  
22 survey for providing national-level intelligence about the experience of cancer patients across  
23 English hospitals). It could be argued that rather than suppressing score made on the basis of  
24 less than 20 respondents as is currently done, all scores which have a reliability below 0.7  
25 should be suppressed. Work in other contexts have shown that when reliability of metrics is  
26 low there is a large amount of misclassification of performance.<sup>23, 27</sup> At the very least we  
27 believe that users of the survey results should be made aware of the reliability of the hospital  
28 scores (with such reliability estimates accompanying the publicly reported scores) so that an  
29 informed interpretation can be made by patients, clinicians, managers and members of the  
30 public. There is a range of reasons why such transparent reporting of reliability of hospital  
31 scores may be useful. For example, a hospital may chose to focus improvement efforts on  
32 those questions where they perform worse than average *and* where they know their scores to  
33 be reliable. As we already noted, hospital comparisons are not the only purpose of the  
34 NCPES. National assessments of patient experiences are supported by CPES and these data  
35 have been used to investigate variation and disparities in care between patient groups<sup>24, 25</sup>. For  
36 these uses that do not involve organisational comparisons, concerns about the lack of inter-  
37 unit reliability are not applicable. Furthermore, it can also be useful to know that all hospitals  
38 are performing above a target level even though we may not be able to distinguish between  
39 them.  
40  
41  
42  
43  
44

45 There are various ways in which the survey could be changed in response to these findings.  
46 Firstly, by redesigning the survey instrument or related reporting conventions. For example,  
47 questions where the variability between hospitals is very low could be considered as  
48 candidates for removal from subsequent survey waves as there is little point in classifying  
49 hospitals on aspects of care for which they have no tangible differences between them. A  
50 similar approach could be taken for questions where hospital performance is very high,  
51 although it may also be possible to add to or redesign the response options (or associated  
52 reporting conventions) to bring the mean reported scores closer to 50% - which will increase  
53 the reliability of these items. We do note that in both these situations there is something to be  
54 celebrated as a lack of variability suggests equitable healthcare delivery and -in the context of  
55 'ceiling' effects, a high performance implies high quality health care delivery. However,  
56 continued measurement of such aspect may not be the best use of patient survey resources. It  
57  
58  
59  
60

1  
2  
3 is not without irony that the aims of quality improvement efforts underpinned by patient  
4 surveys are to improve service and reduce disparities, both of which reduce reliability and in  
5 turn reduce the usefulness of such survey items.  
6

7  
8 Another way by which reliability could be increased is to increase the sample size. Currently  
9 the NCPES sample consists of all patients treated in a particular three-month period. If a  
10 whole year sample was used instead we would have up to four times as many patients  
11 available. Our findings suggest that the vast majority of hospitals-level scores in such a case  
12 would be reliable, though of course there would be an increase in cost of delivering the  
13 survey. Rather than continuing with the current 'census' approach (whereby all patients who  
14 fit eligibility criteria during the survey sampling period form part of the sampling frame),  
15 probability sampling could be used. This would mean surveying more patients than is  
16 currently done in hospitals treating small numbers of cancer patients and fewer than currently  
17 done in those treating many cancer patients, potentially having little impact on the total  
18 sample size. Indeed the optimal design for a survey that puts equal importance on every  
19 hospital is an equal sample size for each hospital and fixed target respondent numbers per  
20 unit of assessment are already used in a number of NHS and international surveys<sup>6, 7</sup>.  
21 However, changing the length of the sampling window will likely impact the composition of  
22 responders as this is dictated by variation in treatment modalities, early mortality and non-  
23 response, the effect of which will depend on the sampling window<sup>28</sup>. This in turn may impact  
24 the ability to compare results to those from previous years. An alternative approach of  
25 aggregating multiple years of survey results will also improve reliability, though it will  
26 reduce the timeliness of scores and potentially reduce the usability of the findings. Similarly,  
27 improvements in response rate can also increase the sample size, in turn improving reliability.  
28 The scope for improvement in this survey may be limited due to it already having a high  
29 response rate, but for other surveys that may not be true.  
30  
31  
32  
33  
34

### 35 **Conclusion**

36  
37 The English Patient Experience Survey represents a globally unique source for understanding  
38 cancer patient experience, but in its present form it is not reliable for high stakes comparisons  
39 of the performance of different hospitals. In profiling the survey we have found that around  
40 two-thirds of hospital scores are not reliable. This severely hampers the use of this survey for  
41 hospital comparisons and raises questions over the suitability of its current design.  
42 Classifying hospitals as being a poor performer on an unreliable question may lead to unfair  
43 reputational loss and misplaced quality improvement efforts resulting in an opportunity cost.  
44 Classifying hospitals as high performers on unreliable questions may lead to false reassurance  
45 in related areas thus missing the opportunity for improvement. Redesigning the questions and  
46 sampling strategy used could dramatically improve the percentage of reliable hospital scores  
47 and thus making the survey far more useful.  
48  
49  
50  
51  
52  
53

### 54 **Figure legends**

55  
56 **Figure 1** Sample sizes for each of the 146 hospitals included in the analysis by question  
57 (CPES 2016). Each rectangle corresponds to a single hospital and question. Its colour  
58 indicates one of five sample size categories as shown on the legend. The exact values for  
59 each cell in this plot are provided in supplementary material Table 1.  
60

**Figure 2** Proportions of patients reporting a positive experience by question and for each of the 146 hospitals included in the analysis (CPES 2016). Each rectangle corresponds to a single hospital and question. Its colour indicates one of five proportions categories as shown on the legend. The exact values for each cell in this plot are provided in supplementary material Table 2.

**Figure 3** Main central grid: Reliability of hospital scores for each of the 146 hospitals included in the analysis (CPES 2016). Each rectangle corresponds to a single hospital and question. Its colour indicates one of four reliability categories as shown on the legend. Left hand side plot: The variance for each question on the log odds scale. The order of the questions has the same order than that of the main grid and is sorted from the question with lowest between hospital variance to the question with greatest between hospital variance. Bottom plot: The sample size for each hospital in terms of the total number of responders. The order of the hospitals has the same order than that of the main grid and is sorted from the hospital with the smallest sample size to the hospital with greatest sample size. The exact values for each cell in this plot are provided in the supplementary material Table 3.

**Figure 4** The expected percentage of hospital scores reaching a reliability of at least 0.7 when changing individual hospital sample sizes for each question.

1. Raleigh V and Foot S. *Getting the measure of quality: Opportunities and challenges*. 2010.
2. Quality Watch. NHS & Social Care Quality Indicators - Data & Statistics <http://www.qualitywatch.org.uk/indicators> (accessed 09/07/2018).
3. NHS Digital. Compendium of Population Health Indicators <https://digital.nhs.uk/data-and-information/publications/ci-hub/compendium-indicators>.
4. Darzi A. Quality and the NHS Next Stage Review. *The Lancet* 2008; 371: 1563-1564.
5. Centers for Medicare & Medicaid Services. Consumer Assessment of Healthcare Providers & Systems (CAHPS), <https://www.cms.gov/Research-Statistics-Data-and-Systems/Research/CAHPS/> (accessed 07/09/2018).
6. Ipsos MORI. 2018 GP Patient Survey Results Released, <https://www.ipsos.com/ipsos-mori/en-uk/2018-gp-patient-survey-results-released> (2018, accessed 07/09/2018).
7. Care Quality Commission. Adult inpatient survey 2017: Statistical release, <https://www.cqc.org.uk/publications/surveys/adult-inpatient-survey-2017> (2018).
8. Abel G, Saunders CL, Mendonca SC, et al. Variation and statistical reliability of publicly reported primary care diagnostic activity indicators for cancer: a cross-sectional ecological study of routine data. *BMJ Quality & Safety* 2018; 27: 21-30. DOI: 10.1136/bmjqs-2017-006607.
9. Roland M, Elliott M, Lyratzopoulos G, et al. Reliability of patient responses in pay for performance schemes: analysis of national General Practitioner Patient Survey data in England. *BMJ* 2009; 339. DOI: 10.1136/bmj.b3851.
10. Lyratzopoulos G, Elliott MN, Barbiere JM, et al. How can health care organizations be reliably compared?: Lessons from a national survey of patient experience. *Medical care* 2011; 49: 724-733. 2011/05/26. DOI: 10.1097/MLR.0b013e31821b3482.
11. Stocks SJ, Kontopantelis E, Akbarov A, et al. Examining variations in prescribing safety in UK general practice: cross sectional study using the Clinical Practice Research Datalink. *BMJ* 2015; 351. DOI: 10.1136/bmj.h5501.
12. Guthrie B, McCowan C, Davey P, et al. High risk prescribing in primary care patients particularly vulnerable to adverse drug events: cross sectional population database analysis in Scottish general practice. *BMJ* 2011; 342. DOI: 10.1136/bmj.d3514.

13. Verburg IWM, de Keizer NF, Holman R, et al. Individual and Clustered Rankability of ICUs According to Case-Mix–Adjusted Mortality\*. *Critical Care Medicine* 2016; 44: 901-909. DOI: 10.1097/ccm.0000000000001521.
14. Guglielminotti J and Li G. Monitoring Obstetric Anesthesia Safety across Hospitals through Multilevel Modeling. *Anesthesiology* 2015; 122: 1268-1279. DOI: 10.1097/ALN.0000000000000617.
15. Krell RW, Hozain A, Kao LS, et al. Reliability of risk-adjusted outcomes for profiling hospital surgical quality. *JAMA Surgery* 2014; 149: 467-474. DOI: 10.1001/jamasurg.2013.4249.
16. Shih T and Dimick JB. Reliability of Readmission Rates as a Hospital Quality Measure in Cardiac Surgery. *The Annals of Thoracic Surgery* 2014; 97: 1214-1218. DOI: <https://doi.org/10.1016/j.athoracsur.2013.11.048>.
17. Van Dishoeck A-M, Lingsma HF, Mackenbach JP, et al. Random variation and rankability of hospitals using outcome indicators. *BMJ Quality & Safety* 2011; 20: 869-874. DOI: 10.1136/bmjqs.2010.048058.
18. Henneman D, van Bommel ACM, Sniijders A, et al. Ranking and Rankability of Hospital Postoperative Mortality Rates in Colorectal Cancer Surgery. *Annals of Surgery* 2014; 259: 844-849. DOI: 10.1097/sla.0000000000000561.
19. Sequist TD, Schneider EC, Li A, et al. Reliability of Medical Group and Physician Performance Measurement in the Primary Care Setting. *Medical care* 2011; 49: 126-131. DOI: 10.1097/MLR.0b013e3181d5690f.
20. Quality Health. Guidance material and survey material, <http://www.ncpes.co.uk/reports/2016-reports/guidance-material-and-survey-materials/3211-2016-cancer-survey-guidance/file> (2016).
21. Quality Health. National Cancer Experience Survey 2016. Reports. Data tables, <http://www.ncpes.co.uk/reports/2016-reports/local-reports-1/data-tables-1> (2017).
22. Quality Health. Technical Documentation, <http://www.ncpes.co.uk/reports/2016-reports/guidance-material-and-survey-materials/3210-2016-national-cancer-patient-experience-survey-technical-documentation/file> (2016).
23. Barclay ME, Lyratzopoulos G, Greenberg DC, et al. Missing data and chance variation in public reporting of cancer stage at diagnosis: Cross-sectional analysis of population-based data in England. *Cancer Epidemiology* 2018; 52: 28-42. DOI: <https://doi.org/10.1016/j.canep.2017.11.005>.
24. El Turabi A, Abel GA, Roland M, et al. Variation in reported experience of involvement in cancer treatment decision making: evidence from the National Cancer Patient Experience Survey. *British Journal Of Cancer* 2013; 109: 780. Epidemiology. DOI: 10.1038/bjc.2013.316  
<https://www.nature.com/articles/bjc2013316#supplementary-information>.
25. Saunders CL, Abel GA and Lyratzopoulos G. Inequalities in reported cancer patient experience by socio-demographic characteristic and cancer site: evidence from respondents to the English Cancer Patient Experience Survey. *European Journal of Cancer Care* 2015; 24: 85-98. DOI: doi:10.1111/ecc.12267.
26. Abel GA, Saunders CL and Lyratzopoulos G. Cancer patient experience, hospital performance and case mix: evidence from England. *Future Oncology* 2014; 10: 1589-1598. DOI: 10.2217/fon.13.266.
27. Yu H, Mehrotra A and Adams J. Reliability of utilization measures for primary care physician profiling. *Healthcare* 2013; 1: 22-29. DOI: <https://doi.org/10.1016/j.hjdsi.2013.04.002>.
28. Abel GA, Saunders CL and Lyratzopoulos G. Post-sampling mortality and non-response patterns in the English Cancer Patient Experience Survey: Implications for epidemiological studies based on surveys of cancer patients. *Cancer Epidemiology* 2016; 41: 34-41. DOI: 10.1016/j.canep.2015.12.010.



Figure 1 Sample sizes for each of the 146 hospitals included in the analysis by question (CPES 2016). Each rectangle corresponds to a single hospital and question. Its colour indicates one of five sample size categories as shown on the legend. The exact values for each cell in this plot are provided in supplementary material Table 1.

304x203mm (300 x 300 DPI)



Figure 2 Proportions of patients reporting a positive experience by question and for each of the 146 hospitals included in the analysis (CPES 2016). Each rectangle corresponds to a single hospital and question. Its colour indicates one of five proportions categories as shown on the legend. The exact values for each cell in this plot are provided in supplementary material Table 2.

304x203mm (300 x 300 DPI)

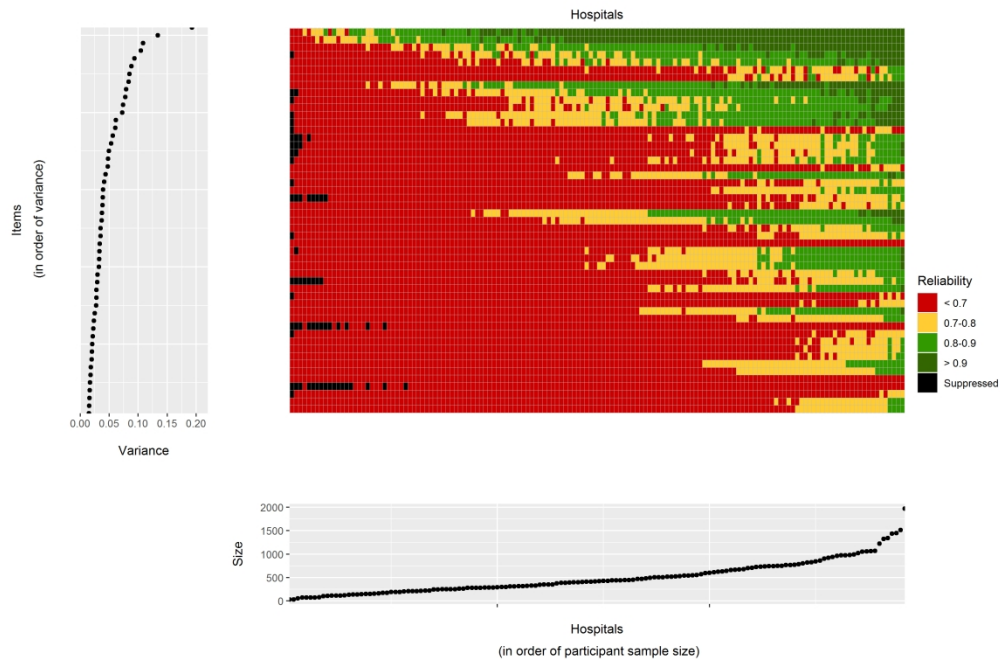

Main central grid: Reliability of hospital scores for each of the 146 hospitals included in the analysis (CPES 2016). Each rectangle corresponds to a single hospital and question. Its colour indicates one of four reliability categories as shown on the legend. Left hand side plot: The variance for each question on the log odds scale. The order of the questions has the same order than that of the main grid and is sorted from the question with lowest between hospital variance to the question with greatest between hospital variance. Bottom plot: The sample size for each hospital in terms of the total number of responders. The order of the hospitals has the same order than that of the main grid and is sorted from the hospital with the smallest sample size to the hospital with greatest sample size. The exact values for each cell in this plot are provided in the supplementary material Table 3.

304x203mm (300 x 300 DPI)

1  
2  
3  
4  
5  
6  
7  
8  
9  
10  
11  
12  
13  
14  
15  
16  
17  
18  
19  
20  
21  
22  
23  
24  
25  
26  
27  
28  
29  
30  
31  
32  
33  
34  
35  
36  
37  
38  
39  
40  
41  
42  
43  
44  
45  
46  
47  
48  
49  
50  
51  
52  
53  
54  
55  
56  
57  
58  
59  
60

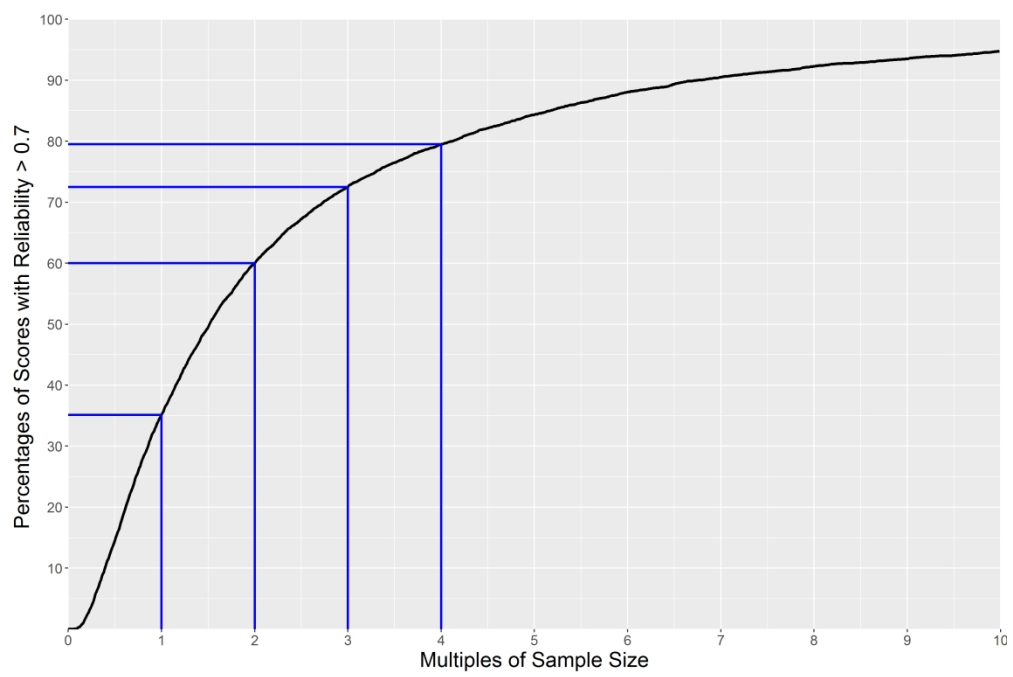

The expected percentage of hospital scores reaching a reliability of at least 0.7 when changing individual hospital sample sizes for each question.

304x203mm (300 x 300 DPI)



**Table 1.** Sample sizes by question for each of the 146 hospitals included in the analysis (CPES 2016).  
the cells in Figure 1.

| Questions | Hospitals |     |     |     |     |     |     |
|-----------|-----------|-----|-----|-----|-----|-----|-----|
|           | RQX       | RRJ | RT3 | RMP | RPC | REP | RAN |
| Q10       | 31        | 30  | 53  | 71  | 70  | 73  | 74  |
| Q49       | 22        | 27  | 44  | 62  | 54  | 68  | 63  |
| Q35       | 20        | 23  | 34  | 45  | 33  | 52  | 44  |
| Q45       | 6         | 6   | 1   | 22  | 6   | 13  | 17  |
| Q26       | 23        | 27  | 46  | 48  | 63  | 64  | 62  |
| Q13       | 29        | 30  | 44  | 65  | 61  | 67  | 66  |
| Q15       | 27        | 29  | 35  | 60  | 54  | 64  | 61  |
| Q9        | 30        | 31  | 53  | 69  | 68  | 71  | 73  |
| Q1        | 23        | 21  | 31  | 56  | 54  | 61  | 58  |
| Q12       | 29        | 23  | 45  | 65  | 54  | 64  | 58  |
| Q30       | 18        | 23  | 41  | 41  | 40  | 50  | 57  |
| Q44       | 8         | 6   | 2   | 22  | 7   | 15  | 18  |
| Q7        | 27        | 26  | 47  | 62  | 55  | 54  | 67  |
| Q14       | 29        | 31  | 47  | 67  | 64  | 68  | 66  |
| Q34       | 21        | 28  | 48  | 54  | 50  | 66  | 62  |
| Q37       | 20        | 28  | 48  | 53  | 50  | 66  | 63  |
| Q16       | 29        | 30  | 50  | 67  | 69  | 71  | 68  |
| Q48       | 5         | 1   | 2   | 20  | 6   | 15  | 6   |
| Q31       | 21        | 28  | 48  | 53  | 50  | 66  | 63  |
| Q11       | 29        | 28  | 37  | 60  | 57  | 65  | 61  |
| Q53       | 21        | 22  | 35  | 51  | 43  | 48  | 55  |
| Q41       | 23        | 19  | 28  | 51  | 40  | 47  | 51  |
| Q25       | 23        | 27  | 47  | 49  | 66  | 65  | 61  |
| Q29       | 20        | 28  | 49  | 55  | 50  | 64  | 63  |
| Q6        | 27        | 27  | 46  | 62  | 56  | 54  | 66  |
| Q55       | 24        | 28  | 38  | 49  | 57  | 54  | 50  |
| Q54       | 29        | 32  | 49  | 68  | 67  | 71  | 71  |
| Q36       | 21        | 26  | 44  | 50  | 45  | 63  | 58  |
| Q47       | 6         | 2   | 4   | 22  | 8   | 16  | 6   |
| Q21       | 24        | 23  | 33  | 53  | 38  | 44  | 44  |
| Q38       | 18        | 27  | 47  | 49  | 48  | 62  | 61  |
| Q2        | 31        | 32  | 50  | 70  | 70  | 72  | 71  |
| Q5        | 26        | 26  | 46  | 63  | 55  | 54  | 63  |
| Q28       | 20        | 28  | 49  | 54  | 49  | 65  | 63  |
| Q19       | 17        | 19  | 36  | 58  | 44  | 57  | 50  |
| Q23       | 18        | 14  | 20  | 39  | 23  | 23  | 32  |
| Q51       | 18        | 14  | 18  | 30  | 17  | 25  | 38  |
| Q39       | 19        | 28  | 44  | 53  | 47  | 64  | 56  |
| Q32       | 20        | 28  | 48  | 54  | 50  | 66  | 63  |
| Q50       | 19        | 23  | 24  | 59  | 29  | 38  | 53  |
| Q56       | 30        | 32  | 49  | 71  | 68  | 73  | 72  |
| Q18       | 18        | 21  | 38  | 62  | 48  | 60  | 55  |
| Q22       | 17        | 20  | 26  | 47  | 24  | 40  | 43  |
| Q8        | 26        | 30  | 47  | 67  | 69  | 71  | 68  |
| Q52       | 25        | 25  | 47  | 59  | 56  | 58  | 55  |

|    |            |    |    |    |    |    |    |    |
|----|------------|----|----|----|----|----|----|----|
| 1  |            |    |    |    |    |    |    |    |
| 2  | <b>Q42</b> | 23 | 21 | 33 | 61 | 61 | 54 | 60 |
| 3  | <b>Q17</b> | 29 | 27 | 47 | 68 | 67 | 70 | 68 |
| 4  | <b>Q20</b> | 19 | 24 | 34 | 61 | 45 | 57 | 51 |
| 5  | <b>Q33</b> | 21 | 28 | 48 | 54 | 49 | 66 | 62 |
| 6  | <b>Q57</b> | 29 | 32 | 48 | 69 | 66 | 73 | 71 |
| 7  | <b>Q58</b> | 29 | 26 | 49 | 66 | 64 | 69 | 70 |
| 8  |            |    |    |    |    |    |    |    |
| 9  |            |    |    |    |    |    |    |    |
| 10 |            |    |    |    |    |    |    |    |
| 11 |            |    |    |    |    |    |    |    |
| 12 |            |    |    |    |    |    |    |    |
| 13 |            |    |    |    |    |    |    |    |
| 14 |            |    |    |    |    |    |    |    |
| 15 |            |    |    |    |    |    |    |    |
| 16 |            |    |    |    |    |    |    |    |
| 17 |            |    |    |    |    |    |    |    |
| 18 |            |    |    |    |    |    |    |    |
| 19 |            |    |    |    |    |    |    |    |
| 20 |            |    |    |    |    |    |    |    |
| 21 |            |    |    |    |    |    |    |    |
| 22 |            |    |    |    |    |    |    |    |
| 23 |            |    |    |    |    |    |    |    |
| 24 |            |    |    |    |    |    |    |    |
| 25 |            |    |    |    |    |    |    |    |
| 26 |            |    |    |    |    |    |    |    |
| 27 |            |    |    |    |    |    |    |    |
| 28 |            |    |    |    |    |    |    |    |
| 29 |            |    |    |    |    |    |    |    |
| 30 |            |    |    |    |    |    |    |    |
| 31 |            |    |    |    |    |    |    |    |
| 32 |            |    |    |    |    |    |    |    |
| 33 |            |    |    |    |    |    |    |    |
| 34 |            |    |    |    |    |    |    |    |
| 35 |            |    |    |    |    |    |    |    |
| 36 |            |    |    |    |    |    |    |    |
| 37 |            |    |    |    |    |    |    |    |
| 38 |            |    |    |    |    |    |    |    |
| 39 |            |    |    |    |    |    |    |    |
| 40 |            |    |    |    |    |    |    |    |
| 41 |            |    |    |    |    |    |    |    |
| 42 |            |    |    |    |    |    |    |    |
| 43 |            |    |    |    |    |    |    |    |
| 44 |            |    |    |    |    |    |    |    |
| 45 |            |    |    |    |    |    |    |    |
| 46 |            |    |    |    |    |    |    |    |
| 47 |            |    |    |    |    |    |    |    |
| 48 |            |    |    |    |    |    |    |    |
| 49 |            |    |    |    |    |    |    |    |
| 50 |            |    |    |    |    |    |    |    |
| 51 |            |    |    |    |    |    |    |    |
| 52 |            |    |    |    |    |    |    |    |
| 53 |            |    |    |    |    |    |    |    |
| 54 |            |    |    |    |    |    |    |    |
| 55 |            |    |    |    |    |    |    |    |
| 56 |            |    |    |    |    |    |    |    |
| 57 |            |    |    |    |    |    |    |    |
| 58 |            |    |    |    |    |    |    |    |
| 59 |            |    |    |    |    |    |    |    |
| 60 |            |    |    |    |    |    |    |    |

For peer review only

These values correspond to

|    | <b>RGM</b> | <b>RBQ</b> | <b>R1F</b> | <b>RKE</b> | <b>RE9</b> | <b>RJ6</b> | <b>RVY</b> | <b>RA4</b> | <b>RJN</b> |
|----|------------|------------|------------|------------|------------|------------|------------|------------|------------|
| 10 | 75         | 101        | 107        | 110        | 112        | 115        | 118        | 133        | 134        |
| 11 | 70         | 84         | 83         | 86         | 88         | 89         | 88         | 102        | 97         |
| 12 | 33         | 59         | 49         | 50         | 44         | 50         | 35         | 52         | 43         |
| 13 | 16         | 15         | 16         | 20         | 14         | 19         | 11         | 19         | 33         |
| 14 | 48         | 79         | 69         | 57         | 46         | 68         | 52         | 74         | 76         |
| 15 | 62         | 95         | 101        | 106        | 110        | 108        | 116        | 127        | 131        |
| 16 | 57         | 89         | 94         | 94         | 100        | 101        | 102        | 115        | 124        |
| 17 | 75         | 100        | 108        | 105        | 110        | 112        | 118        | 131        | 133        |
| 18 | 45         | 71         | 70         | 89         | 82         | 79         | 92         | 104        | 83         |
| 19 | 66         | 87         | 93         | 99         | 100        | 96         | 99         | 110        | 115        |
| 20 | 48         | 70         | 61         | 49         | 53         | 64         | 42         | 60         | 50         |
| 21 | 16         | 16         | 20         | 22         | 16         | 22         | 12         | 22         | 36         |
| 22 | 73         | 80         | 100        | 86         | 96         | 103        | 94         | 117        | 108        |
| 23 | 67         | 96         | 103        | 103        | 106        | 109        | 112        | 123        | 130        |
| 24 | 53         | 83         | 75         | 57         | 57         | 76         | 51         | 79         | 66         |
| 25 | 53         | 83         | 75         | 57         | 57         | 76         | 52         | 79         | 66         |
| 26 | 70         | 99         | 102        | 106        | 108        | 106        | 112        | 128        | 131        |
| 27 | 11         | 21         | 28         | 55         | 52         | 40         | 44         | 60         | 62         |
| 28 | 53         | 82         | 75         | 56         | 57         | 76         | 51         | 78         | 65         |
| 29 | 64         | 85         | 94         | 95         | 97         | 103        | 103        | 114        | 120        |
| 30 | 51         | 73         | 71         | 81         | 84         | 75         | 83         | 82         | 98         |
| 31 | 48         | 64         | 76         | 79         | 92         | 82         | 83         | 94         | 103        |
| 32 | 49         | 80         | 68         | 56         | 46         | 70         | 51         | 74         | 78         |
| 33 | 53         | 83         | 75         | 56         | 56         | 75         | 52         | 78         | 66         |
| 34 | 73         | 80         | 99         | 84         | 94         | 103        | 95         | 118        | 108        |
| 35 | 62         | 77         | 92         | 79         | 87         | 76         | 94         | 101        | 105        |
| 36 | 75         | 97         | 102        | 101        | 109        | 107        | 117        | 129        | 130        |
| 37 | 50         | 76         | 66         | 52         | 50         | 58         | 44         | 64         | 56         |
| 38 | 14         | 20         | 31         | 59         | 60         | 43         | 53         | 65         | 68         |
| 39 | 45         | 67         | 67         | 86         | 78         | 64         | 76         | 78         | 77         |
| 40 | 52         | 79         | 70         | 51         | 53         | 69         | 44         | 71         | 59         |
| 41 | 72         | 102        | 107        | 110        | 108        | 112        | 117        | 129        | 131        |
| 42 | 73         | 81         | 101        | 87         | 96         | 101        | 95         | 118        | 106        |
| 43 | 53         | 81         | 75         | 55         | 56         | 73         | 52         | 79         | 66         |
| 44 | 56         | 73         | 82         | 94         | 95         | 71         | 78         | 84         | 101        |
| 45 | 22         | 37         | 39         | 60         | 49         | 44         | 45         | 56         | 55         |
| 46 | 22         | 56         | 36         | 37         | 33         | 35         | 37         | 27         | 35         |
| 47 | 51         | 81         | 71         | 54         | 55         | 69         | 47         | 76         | 64         |
| 48 | 53         | 82         | 75         | 57         | 57         | 75         | 50         | 78         | 65         |
| 49 | 35         | 77         | 62         | 60         | 60         | 56         | 60         | 42         | 71         |
| 50 | 75         | 99         | 105        | 105        | 109        | 107        | 120        | 132        | 133        |
| 51 | 63         | 78         | 86         | 98         | 94         | 73         | 82         | 97         | 107        |
| 52 | 37         | 58         | 58         | 63         | 72         | 48         | 56         | 69         | 49         |
| 53 | 70         | 100        | 100        | 105        | 104        | 106        | 109        | 125        | 125        |
| 54 | 65         | 83         | 85         | 90         | 100        | 101        | 89         | 115        | 110        |

|    |    |     |     |     |     |     |     |     |     |
|----|----|-----|-----|-----|-----|-----|-----|-----|-----|
| 1  |    |     |     |     |     |     |     |     |     |
| 2  | 59 | 79  | 87  | 94  | 97  | 94  | 94  | 115 | 125 |
| 3  | 74 | 98  | 105 | 109 | 106 | 100 | 110 | 129 | 127 |
| 4  | 50 | 73  | 84  | 92  | 87  | 75  | 87  | 86  | 93  |
| 5  | 53 | 81  | 75  | 57  | 57  | 74  | 49  | 78  | 65  |
| 6  | 74 | 100 | 103 | 105 | 109 | 109 | 117 | 131 | 130 |
| 7  | 70 | 97  | 105 | 102 | 104 | 98  | 120 | 124 | 127 |
| 8  |    |     |     |     |     |     |     |     |     |
| 9  |    |     |     |     |     |     |     |     |     |
| 10 |    |     |     |     |     |     |     |     |     |
| 11 |    |     |     |     |     |     |     |     |     |
| 12 |    |     |     |     |     |     |     |     |     |
| 13 |    |     |     |     |     |     |     |     |     |
| 14 |    |     |     |     |     |     |     |     |     |
| 15 |    |     |     |     |     |     |     |     |     |
| 16 |    |     |     |     |     |     |     |     |     |
| 17 |    |     |     |     |     |     |     |     |     |
| 18 |    |     |     |     |     |     |     |     |     |
| 19 |    |     |     |     |     |     |     |     |     |
| 20 |    |     |     |     |     |     |     |     |     |
| 21 |    |     |     |     |     |     |     |     |     |
| 22 |    |     |     |     |     |     |     |     |     |
| 23 |    |     |     |     |     |     |     |     |     |
| 24 |    |     |     |     |     |     |     |     |     |
| 25 |    |     |     |     |     |     |     |     |     |
| 26 |    |     |     |     |     |     |     |     |     |
| 27 |    |     |     |     |     |     |     |     |     |
| 28 |    |     |     |     |     |     |     |     |     |
| 29 |    |     |     |     |     |     |     |     |     |
| 30 |    |     |     |     |     |     |     |     |     |
| 31 |    |     |     |     |     |     |     |     |     |
| 32 |    |     |     |     |     |     |     |     |     |
| 33 |    |     |     |     |     |     |     |     |     |
| 34 |    |     |     |     |     |     |     |     |     |
| 35 |    |     |     |     |     |     |     |     |     |
| 36 |    |     |     |     |     |     |     |     |     |
| 37 |    |     |     |     |     |     |     |     |     |
| 38 |    |     |     |     |     |     |     |     |     |
| 39 |    |     |     |     |     |     |     |     |     |
| 40 |    |     |     |     |     |     |     |     |     |
| 41 |    |     |     |     |     |     |     |     |     |
| 42 |    |     |     |     |     |     |     |     |     |
| 43 |    |     |     |     |     |     |     |     |     |
| 44 |    |     |     |     |     |     |     |     |     |
| 45 |    |     |     |     |     |     |     |     |     |
| 46 |    |     |     |     |     |     |     |     |     |
| 47 |    |     |     |     |     |     |     |     |     |
| 48 |    |     |     |     |     |     |     |     |     |
| 49 |    |     |     |     |     |     |     |     |     |
| 50 |    |     |     |     |     |     |     |     |     |
| 51 |    |     |     |     |     |     |     |     |     |
| 52 |    |     |     |     |     |     |     |     |     |
| 53 |    |     |     |     |     |     |     |     |     |
| 54 |    |     |     |     |     |     |     |     |     |
| 55 |    |     |     |     |     |     |     |     |     |
| 56 |    |     |     |     |     |     |     |     |     |
| 57 |    |     |     |     |     |     |     |     |     |
| 58 |    |     |     |     |     |     |     |     |     |
| 59 |    |     |     |     |     |     |     |     |     |
| 60 |    |     |     |     |     |     |     |     |     |

For peer review only

1  
2  
3  
4  
5  
6  
7  
8  
9  
10  
11  
12  
13  
14  
15  
16  
17  
18  
19  
20  
21  
22  
23  
24  
25  
26  
27  
28  
29  
30  
31  
32  
33  
34  
35  
36  
37  
38  
39  
40  
41  
42  
43  
44  
45  
46  
47  
48  
49  
50  
51  
52  
53  
54  
55  
56  
57  
58  
59  
60

| <b>RAS</b> | <b>RFR</b> | <b>RAX</b> | <b>RWW</b> | <b>RM3</b> | <b>RQM</b> | <b>RVR</b> | <b>RJR</b> | <b>RC1</b> |
|------------|------------|------------|------------|------------|------------|------------|------------|------------|
| 137        | 138        | 143        | 149        | 150        | 157        | 170        | 175        | 187        |
| 111        | 121        | 113        | 114        | 133        | 112        | 120        | 130        | 136        |
| 60         | 67         | 62         | 62         | 90         | 62         | 55         | 61         | 85         |
| 25         | 24         | 15         | 24         | 29         | 32         | 12         | 25         | 35         |
| 71         | 72         | 92         | 77         | 92         | 70         | 66         | 82         | 129        |
| 128        | 132        | 132        | 136        | 146        | 149        | 154        | 163        | 179        |
| 121        | 122        | 112        | 129        | 132        | 134        | 139        | 150        | 160        |
| 136        | 137        | 142        | 147        | 146        | 154        | 166        | 172        | 187        |
| 101        | 104        | 108        | 105        | 102        | 110        | 128        | 127        | 133        |
| 113        | 117        | 116        | 120        | 130        | 140        | 136        | 156        | 158        |
| 67         | 68         | 78         | 77         | 97         | 61         | 76         | 76         | 100        |
| 28         | 27         | 18         | 28         | 36         | 36         | 15         | 30         | 41         |
| 115        | 117        | 125        | 126        | 128        | 128        | 135        | 155        | 165        |
| 128        | 133        | 132        | 135        | 143        | 144        | 155        | 164        | 174        |
| 79         | 83         | 100        | 89         | 112        | 88         | 83         | 89         | 119        |
| 79         | 81         | 100        | 88         | 112        | 87         | 83         | 89         | 119        |
| 133        | 134        | 133        | 143        | 145        | 150        | 154        | 166        | 179        |
| 56         | 54         | 49         | 36         | 49         | 73         | 57         | 61         | 58         |
| 79         | 83         | 100        | 89         | 110        | 87         | 82         | 89         | 117        |
| 128        | 122        | 122        | 129        | 121        | 138        | 147        | 155        | 167        |
| 87         | 85         | 92         | 94         | 106        | 98         | 92         | 113        | 128        |
| 102        | 109        | 98         | 106        | 106        | 117        | 109        | 110        | 139        |
| 71         | 72         | 94         | 80         | 93         | 71         | 64         | 82         | 130        |
| 78         | 83         | 100        | 89         | 112        | 87         | 83         | 88         | 118        |
| 116        | 116        | 122        | 128        | 128        | 130        | 133        | 157        | 163        |
| 108        | 111        | 96         | 111        | 114        | 110        | 118        | 134        | 149        |
| 128        | 129        | 134        | 140        | 140        | 150        | 161        | 169        | 176        |
| 65         | 75         | 77         | 77         | 95         | 73         | 67         | 69         | 104        |
| 60         | 58         | 53         | 40         | 55         | 77         | 61         | 68         | 65         |
| 81         | 84         | 68         | 86         | 90         | 93         | 85         | 92         | 105        |
| 73         | 79         | 96         | 84         | 105        | 76         | 76         | 83         | 112        |
| 135        | 136        | 144        | 151        | 148        | 154        | 161        | 172        | 184        |
| 114        | 117        | 124        | 125        | 129        | 124        | 129        | 156        | 165        |
| 79         | 83         | 100        | 89         | 111        | 87         | 82         | 87         | 117        |
| 105        | 114        | 97         | 105        | 114        | 111        | 134        | 131        | 122        |
| 59         | 57         | 53         | 63         | 62         | 70         | 51         | 54         | 67         |
| 38         | 51         | 36         | 40         | 64         | 43         | 35         | 44         | 45         |
| 76         | 83         | 95         | 86         | 106        | 79         | 79         | 86         | 111        |
| 79         | 81         | 99         | 86         | 111        | 88         | 83         | 89         | 119        |
| 64         | 85         | 56         | 85         | 92         | 73         | 66         | 74         | 78         |
| 137        | 135        | 145        | 145        | 147        | 156        | 163        | 171        | 181        |
| 108        | 125        | 108        | 111        | 116        | 115        | 140        | 133        | 122        |
| 66         | 79         | 45         | 77         | 86         | 68         | 54         | 63         | 80         |
| 130        | 133        | 124        | 140        | 138        | 139        | 158        | 163        | 170        |
| 115        | 110        | 116        | 111        | 135        | 136        | 130        | 139        | 157        |

|    |     |     |     |     |     |     |     |     |     |
|----|-----|-----|-----|-----|-----|-----|-----|-----|-----|
| 1  |     |     |     |     |     |     |     |     |     |
| 2  | 113 | 117 | 115 | 123 | 121 | 136 | 141 | 144 | 162 |
| 3  | 131 | 138 | 132 | 137 | 142 | 149 | 159 | 164 | 172 |
| 4  | 99  | 100 | 92  | 97  | 113 | 110 | 106 | 111 | 121 |
| 5  | 79  | 83  | 96  | 88  | 110 | 86  | 82  | 88  | 119 |
| 6  | 135 | 135 | 141 | 146 | 145 | 152 | 163 | 173 | 181 |
| 7  | 129 | 132 | 135 | 145 | 133 | 145 | 153 | 164 | 175 |
| 8  |     |     |     |     |     |     |     |     |     |
| 9  |     |     |     |     |     |     |     |     |     |
| 10 |     |     |     |     |     |     |     |     |     |
| 11 |     |     |     |     |     |     |     |     |     |
| 12 |     |     |     |     |     |     |     |     |     |
| 13 |     |     |     |     |     |     |     |     |     |
| 14 |     |     |     |     |     |     |     |     |     |
| 15 |     |     |     |     |     |     |     |     |     |
| 16 |     |     |     |     |     |     |     |     |     |
| 17 |     |     |     |     |     |     |     |     |     |
| 18 |     |     |     |     |     |     |     |     |     |
| 19 |     |     |     |     |     |     |     |     |     |
| 20 |     |     |     |     |     |     |     |     |     |
| 21 |     |     |     |     |     |     |     |     |     |
| 22 |     |     |     |     |     |     |     |     |     |
| 23 |     |     |     |     |     |     |     |     |     |
| 24 |     |     |     |     |     |     |     |     |     |
| 25 |     |     |     |     |     |     |     |     |     |
| 26 |     |     |     |     |     |     |     |     |     |
| 27 |     |     |     |     |     |     |     |     |     |
| 28 |     |     |     |     |     |     |     |     |     |
| 29 |     |     |     |     |     |     |     |     |     |
| 30 |     |     |     |     |     |     |     |     |     |
| 31 |     |     |     |     |     |     |     |     |     |
| 32 |     |     |     |     |     |     |     |     |     |
| 33 |     |     |     |     |     |     |     |     |     |
| 34 |     |     |     |     |     |     |     |     |     |
| 35 |     |     |     |     |     |     |     |     |     |
| 36 |     |     |     |     |     |     |     |     |     |
| 37 |     |     |     |     |     |     |     |     |     |
| 38 |     |     |     |     |     |     |     |     |     |
| 39 |     |     |     |     |     |     |     |     |     |
| 40 |     |     |     |     |     |     |     |     |     |
| 41 |     |     |     |     |     |     |     |     |     |
| 42 |     |     |     |     |     |     |     |     |     |
| 43 |     |     |     |     |     |     |     |     |     |
| 44 |     |     |     |     |     |     |     |     |     |
| 45 |     |     |     |     |     |     |     |     |     |
| 46 |     |     |     |     |     |     |     |     |     |
| 47 |     |     |     |     |     |     |     |     |     |
| 48 |     |     |     |     |     |     |     |     |     |
| 49 |     |     |     |     |     |     |     |     |     |
| 50 |     |     |     |     |     |     |     |     |     |
| 51 |     |     |     |     |     |     |     |     |     |
| 52 |     |     |     |     |     |     |     |     |     |
| 53 |     |     |     |     |     |     |     |     |     |
| 54 |     |     |     |     |     |     |     |     |     |
| 55 |     |     |     |     |     |     |     |     |     |
| 56 |     |     |     |     |     |     |     |     |     |
| 57 |     |     |     |     |     |     |     |     |     |
| 58 |     |     |     |     |     |     |     |     |     |
| 59 |     |     |     |     |     |     |     |     |     |
| 60 |     |     |     |     |     |     |     |     |     |

For peer review only

1  
2  
3  
4  
5  
6  
7  
8  
9  
10  
11  
12  
13  
14  
15  
16  
17  
18  
19  
20  
21  
22  
23  
24  
25  
26  
27  
28  
29  
30  
31  
32  
33  
34  
35  
36  
37  
38  
39  
40  
41  
42  
43  
44  
45  
46  
47  
48  
49  
50  
51  
52  
53  
54  
55  
56  
57  
58  
59  
60

| <b>RFF</b> | <b>RJ2</b> | <b>RA3</b> | <b>RBT</b> | <b>REN</b> | <b>RRF</b> | <b>RAP</b> | <b>RMC</b> | <b>RLQ</b> |
|------------|------------|------------|------------|------------|------------|------------|------------|------------|
| 189        | 191        | 197        | 209        | 208        | 209        | 208        | 214        | 213        |
| 150        | 157        | 150        | 168        | 170        | 161        | 180        | 170        | 169        |
| 84         | 87         | 57         | 74         | 89         | 81         | 80         | 101        | 68         |
| 27         | 33         | 20         | 22         | 135        | 25         | 77         | 36         | 43         |
| 99         | 96         | 94         | 119        | 59         | 119        | 88         | 138        | 109        |
| 168        | 187        | 182        | 197        | 204        | 196        | 203        | 205        | 204        |
| 148        | 179        | 177        | 184        | 201        | 173        | 188        | 184        | 185        |
| 187        | 191        | 190        | 205        | 204        | 205        | 208        | 211        | 213        |
| 137        | 145        | 150        | 154        | 173        | 146        | 134        | 134        | 165        |
| 159        | 176        | 157        | 171        | 183        | 181        | 180        | 192        | 190        |
| 93         | 91         | 72         | 93         | 94         | 101        | 95         | 116        | 82         |
| 28         | 36         | 27         | 25         | 160        | 30         | 81         | 51         | 49         |
| 154        | 164        | 163        | 185        | 178        | 177        | 167        | 189        | 160        |
| 173        | 188        | 186        | 194        | 201        | 201        | 203        | 204        | 200        |
| 118        | 106        | 91         | 109        | 110        | 120        | 106        | 139        | 102        |
| 118        | 106        | 88         | 111        | 110        | 123        | 106        | 139        | 102        |
| 174        | 189        | 188        | 202        | 203        | 192        | 203        | 203        | 212        |
| 76         | 117        | 94         | 66         | 88         | 72         | 132        | 64         | 74         |
| 118        | 107        | 90         | 111        | 110        | 121        | 106        | 139        | 102        |
| 158        | 177        | 168        | 181        | 177        | 183        | 187        | 191        | 187        |
| 117        | 133        | 117        | 125        | 158        | 137        | 155        | 137        | 149        |
| 129        | 146        | 140        | 142        | 169        | 150        | 159        | 162        | 147        |
| 102        | 95         | 94         | 122        | 57         | 123        | 86         | 139        | 112        |
| 118        | 107        | 91         | 111        | 110        | 121        | 108        | 140        | 102        |
| 152        | 164        | 164        | 185        | 175        | 175        | 169        | 190        | 161        |
| 143        | 138        | 144        | 154        | 167        | 171        | 168        | 159        | 166        |
| 180        | 180        | 186        | 199        | 202        | 202        | 202        | 205        | 215        |
| 88         | 95         | 81         | 98         | 95         | 110        | 86         | 120        | 88         |
| 82         | 125        | 97         | 73         | 95         | 83         | 145        | 75         | 83         |
| 114        | 140        | 115        | 121        | 152        | 127        | 156        | 145        | 131        |
| 105        | 98         | 82         | 104        | 102        | 112        | 100        | 133        | 95         |
| 182        | 191        | 192        | 199        | 205        | 205        | 210        | 214        | 214        |
| 151        | 159        | 165        | 185        | 174        | 176        | 167        | 187        | 164        |
| 118        | 107        | 89         | 110        | 109        | 118        | 107        | 139        | 102        |
| 126        | 147        | 142        | 156        | 159        | 143        | 179        | 158        | 150        |
| 79         | 103        | 78         | 80         | 84         | 77         | 129        | 75         | 86         |
| 68         | 62         | 50         | 64         | 97         | 62         | 89         | 63         | 62         |
| 112        | 105        | 89         | 102        | 107        | 115        | 99         | 137        | 100        |
| 118        | 107        | 90         | 110        | 110        | 120        | 105        | 138        | 101        |
| 108        | 105        | 68         | 112        | 114        | 119        | 131        | 109        | 126        |
| 185        | 189        | 192        | 203        | 208        | 206        | 208        | 213        | 219        |
| 136        | 152        | 147        | 163        | 159        | 148        | 178        | 159        | 156        |
| 109        | 119        | 99         | 94         | 119        | 107        | 142        | 105        | 99         |
| 175        | 178        | 177        | 191        | 200        | 198        | 194        | 207        | 200        |
| 140        | 168        | 152        | 169        | 167        | 173        | 188        | 173        | 166        |

|    |     |     |     |     |     |     |     |     |     |
|----|-----|-----|-----|-----|-----|-----|-----|-----|-----|
| 1  |     |     |     |     |     |     |     |     |     |
| 2  | 153 | 174 | 173 | 172 | 192 | 177 | 179 | 188 | 190 |
| 3  | 171 | 187 | 193 | 197 | 201 | 191 | 204 | 198 | 207 |
| 4  | 126 | 134 | 150 | 138 | 173 | 145 | 169 | 165 | 153 |
| 5  | 113 | 104 | 90  | 110 | 110 | 119 | 105 | 139 | 100 |
| 6  | 181 | 189 | 191 | 204 | 207 | 207 | 212 | 212 | 219 |
| 7  | 179 | 184 | 180 | 199 | 198 | 196 | 199 | 200 | 210 |
| 8  |     |     |     |     |     |     |     |     |     |
| 9  |     |     |     |     |     |     |     |     |     |
| 10 |     |     |     |     |     |     |     |     |     |
| 11 |     |     |     |     |     |     |     |     |     |
| 12 |     |     |     |     |     |     |     |     |     |
| 13 |     |     |     |     |     |     |     |     |     |
| 14 |     |     |     |     |     |     |     |     |     |
| 15 |     |     |     |     |     |     |     |     |     |
| 16 |     |     |     |     |     |     |     |     |     |
| 17 |     |     |     |     |     |     |     |     |     |
| 18 |     |     |     |     |     |     |     |     |     |
| 19 |     |     |     |     |     |     |     |     |     |
| 20 |     |     |     |     |     |     |     |     |     |
| 21 |     |     |     |     |     |     |     |     |     |
| 22 |     |     |     |     |     |     |     |     |     |
| 23 |     |     |     |     |     |     |     |     |     |
| 24 |     |     |     |     |     |     |     |     |     |
| 25 |     |     |     |     |     |     |     |     |     |
| 26 |     |     |     |     |     |     |     |     |     |
| 27 |     |     |     |     |     |     |     |     |     |
| 28 |     |     |     |     |     |     |     |     |     |
| 29 |     |     |     |     |     |     |     |     |     |
| 30 |     |     |     |     |     |     |     |     |     |
| 31 |     |     |     |     |     |     |     |     |     |
| 32 |     |     |     |     |     |     |     |     |     |
| 33 |     |     |     |     |     |     |     |     |     |
| 34 |     |     |     |     |     |     |     |     |     |
| 35 |     |     |     |     |     |     |     |     |     |
| 36 |     |     |     |     |     |     |     |     |     |
| 37 |     |     |     |     |     |     |     |     |     |
| 38 |     |     |     |     |     |     |     |     |     |
| 39 |     |     |     |     |     |     |     |     |     |
| 40 |     |     |     |     |     |     |     |     |     |
| 41 |     |     |     |     |     |     |     |     |     |
| 42 |     |     |     |     |     |     |     |     |     |
| 43 |     |     |     |     |     |     |     |     |     |
| 44 |     |     |     |     |     |     |     |     |     |
| 45 |     |     |     |     |     |     |     |     |     |
| 46 |     |     |     |     |     |     |     |     |     |
| 47 |     |     |     |     |     |     |     |     |     |
| 48 |     |     |     |     |     |     |     |     |     |
| 49 |     |     |     |     |     |     |     |     |     |
| 50 |     |     |     |     |     |     |     |     |     |
| 51 |     |     |     |     |     |     |     |     |     |
| 52 |     |     |     |     |     |     |     |     |     |
| 53 |     |     |     |     |     |     |     |     |     |
| 54 |     |     |     |     |     |     |     |     |     |
| 55 |     |     |     |     |     |     |     |     |     |
| 56 |     |     |     |     |     |     |     |     |     |
| 57 |     |     |     |     |     |     |     |     |     |
| 58 |     |     |     |     |     |     |     |     |     |
| 59 |     |     |     |     |     |     |     |     |     |
| 60 |     |     |     |     |     |     |     |     |     |

For peer review only



1  
2  
3  
4  
5  
6  
7  
8  
9  
10  
11  
12  
13  
14  
15  
16  
17  
18  
19  
20  
21  
22  
23  
24  
25  
26  
27  
28  
29  
30  
31  
32  
33  
34  
35  
36  
37  
38  
39  
40  
41  
42  
43  
44  
45  
46  
47  
48  
49  
50  
51  
52  
53  
54  
55  
56  
57  
58  
59  
60

| RLT | RDZ | RBK | RQQ | RBN | RDD | RFS | RTK | RCF |
|-----|-----|-----|-----|-----|-----|-----|-----|-----|
| 241 | 243 | 247 | 247 | 249 | 248 | 254 | 257 | 272 |
| 198 | 190 | 200 | 197 | 197 | 185 | 202 | 203 | 215 |
| 88  | 125 | 125 | 80  | 129 | 108 | 115 | 95  | 114 |
| 58  | 52  | 43  | 31  | 21  | 30  | 39  | 25  | 40  |
| 106 | 196 | 134 | 109 | 195 | 118 | 132 | 133 | 132 |
| 231 | 232 | 234 | 234 | 224 | 238 | 244 | 236 | 262 |
| 214 | 208 | 225 | 217 | 196 | 217 | 218 | 225 | 234 |
| 232 | 237 | 242 | 245 | 248 | 248 | 253 | 255 | 265 |
| 184 | 177 | 164 | 197 | 195 | 170 | 186 | 175 | 213 |
| 205 | 219 | 214 | 213 | 211 | 212 | 216 | 218 | 230 |
| 102 | 138 | 135 | 99  | 158 | 117 | 125 | 125 | 128 |
| 67  | 54  | 48  | 38  | 26  | 33  | 45  | 31  | 50  |
| 201 | 217 | 219 | 208 | 215 | 204 | 212 | 211 | 233 |
| 228 | 232 | 232 | 232 | 231 | 231 | 238 | 238 | 259 |
| 121 | 179 | 155 | 118 | 187 | 141 | 153 | 145 | 165 |
| 122 | 179 | 154 | 118 | 190 | 141 | 152 | 144 | 166 |
| 228 | 240 | 235 | 234 | 232 | 236 | 241 | 251 | 263 |
| 134 | 87  | 134 | 119 | 57  | 103 | 102 | 91  | 149 |
| 122 | 179 | 154 | 120 | 187 | 143 | 153 | 145 | 166 |
| 207 | 207 | 211 | 213 | 207 | 219 | 222 | 228 | 227 |
| 158 | 146 | 162 | 177 | 163 | 151 | 162 | 160 | 167 |
| 192 | 173 | 185 | 185 | 174 | 184 | 193 | 160 | 213 |
| 104 | 194 | 135 | 111 | 197 | 117 | 132 | 135 | 136 |
| 122 | 180 | 155 | 118 | 188 | 142 | 153 | 145 | 165 |
| 198 | 218 | 216 | 208 | 217 | 206 | 211 | 207 | 230 |
| 174 | 196 | 183 | 192 | 186 | 197 | 190 | 199 | 206 |
| 228 | 233 | 232 | 239 | 236 | 234 | 240 | 250 | 259 |
| 104 | 157 | 139 | 105 | 165 | 121 | 136 | 121 | 134 |
| 140 | 94  | 148 | 134 | 64  | 109 | 111 | 104 | 167 |
| 163 | 145 | 169 | 152 | 142 | 158 | 147 | 154 | 166 |
| 114 | 172 | 146 | 108 | 180 | 131 | 144 | 131 | 151 |
| 236 | 241 | 244 | 241 | 250 | 242 | 255 | 252 | 271 |
| 197 | 216 | 216 | 207 | 217 | 200 | 209 | 206 | 226 |
| 120 | 179 | 153 | 119 | 188 | 142 | 151 | 145 | 165 |
| 192 | 191 | 178 | 198 | 169 | 164 | 157 | 190 | 172 |
| 113 | 95  | 131 | 90  | 104 | 104 | 111 | 107 | 111 |
| 64  | 72  | 72  | 74  | 77  | 83  | 87  | 70  | 94  |
| 116 | 177 | 150 | 110 | 183 | 131 | 144 | 138 | 156 |
| 122 | 179 | 155 | 118 | 188 | 143 | 152 | 144 | 163 |
| 102 | 133 | 120 | 140 | 132 | 131 | 148 | 114 | 159 |
| 233 | 242 | 245 | 242 | 244 | 244 | 250 | 256 | 272 |
| 193 | 194 | 189 | 197 | 181 | 177 | 165 | 200 | 185 |
| 132 | 97  | 168 | 129 | 123 | 123 | 115 | 107 | 132 |
| 226 | 234 | 229 | 228 | 231 | 231 | 233 | 242 | 244 |
| 187 | 196 | 183 | 197 | 195 | 206 | 189 | 214 | 205 |

|    |     |     |     |     |     |     |     |     |     |
|----|-----|-----|-----|-----|-----|-----|-----|-----|-----|
| 1  |     |     |     |     |     |     |     |     |     |
| 2  | 212 | 201 | 210 | 222 | 204 | 196 | 218 | 204 | 250 |
| 3  | 231 | 240 | 235 | 235 | 232 | 227 | 235 | 245 | 254 |
| 4  | 170 | 174 | 209 | 179 | 167 | 176 | 174 | 172 | 215 |
| 5  | 119 | 177 | 153 | 118 | 186 | 140 | 153 | 145 | 163 |
| 6  | 234 | 241 | 240 | 241 | 243 | 239 | 250 | 256 | 268 |
| 7  | 227 | 235 | 235 | 234 | 231 | 232 | 243 | 247 | 259 |
| 8  |     |     |     |     |     |     |     |     |     |
| 9  |     |     |     |     |     |     |     |     |     |
| 10 |     |     |     |     |     |     |     |     |     |
| 11 |     |     |     |     |     |     |     |     |     |
| 12 |     |     |     |     |     |     |     |     |     |
| 13 |     |     |     |     |     |     |     |     |     |
| 14 |     |     |     |     |     |     |     |     |     |
| 15 |     |     |     |     |     |     |     |     |     |
| 16 |     |     |     |     |     |     |     |     |     |
| 17 |     |     |     |     |     |     |     |     |     |
| 18 |     |     |     |     |     |     |     |     |     |
| 19 |     |     |     |     |     |     |     |     |     |
| 20 |     |     |     |     |     |     |     |     |     |
| 21 |     |     |     |     |     |     |     |     |     |
| 22 |     |     |     |     |     |     |     |     |     |
| 23 |     |     |     |     |     |     |     |     |     |
| 24 |     |     |     |     |     |     |     |     |     |
| 25 |     |     |     |     |     |     |     |     |     |
| 26 |     |     |     |     |     |     |     |     |     |
| 27 |     |     |     |     |     |     |     |     |     |
| 28 |     |     |     |     |     |     |     |     |     |
| 29 |     |     |     |     |     |     |     |     |     |
| 30 |     |     |     |     |     |     |     |     |     |
| 31 |     |     |     |     |     |     |     |     |     |
| 32 |     |     |     |     |     |     |     |     |     |
| 33 |     |     |     |     |     |     |     |     |     |
| 34 |     |     |     |     |     |     |     |     |     |
| 35 |     |     |     |     |     |     |     |     |     |
| 36 |     |     |     |     |     |     |     |     |     |
| 37 |     |     |     |     |     |     |     |     |     |
| 38 |     |     |     |     |     |     |     |     |     |
| 39 |     |     |     |     |     |     |     |     |     |
| 40 |     |     |     |     |     |     |     |     |     |
| 41 |     |     |     |     |     |     |     |     |     |
| 42 |     |     |     |     |     |     |     |     |     |
| 43 |     |     |     |     |     |     |     |     |     |
| 44 |     |     |     |     |     |     |     |     |     |
| 45 |     |     |     |     |     |     |     |     |     |
| 46 |     |     |     |     |     |     |     |     |     |
| 47 |     |     |     |     |     |     |     |     |     |
| 48 |     |     |     |     |     |     |     |     |     |
| 49 |     |     |     |     |     |     |     |     |     |
| 50 |     |     |     |     |     |     |     |     |     |
| 51 |     |     |     |     |     |     |     |     |     |
| 52 |     |     |     |     |     |     |     |     |     |
| 53 |     |     |     |     |     |     |     |     |     |
| 54 |     |     |     |     |     |     |     |     |     |
| 55 |     |     |     |     |     |     |     |     |     |
| 56 |     |     |     |     |     |     |     |     |     |
| 57 |     |     |     |     |     |     |     |     |     |
| 58 |     |     |     |     |     |     |     |     |     |
| 59 |     |     |     |     |     |     |     |     |     |
| 60 |     |     |     |     |     |     |     |     |     |

For peer review only

1  
2  
3  
4  
5  
6  
7  
8  
9  
10  
11  
12  
13  
14  
15  
16  
17  
18  
19  
20  
21  
22  
23  
24  
25  
26  
27  
28  
29  
30  
31  
32  
33  
34  
35  
36  
37  
38  
39  
40  
41  
42  
43  
44  
45  
46  
47  
48  
49  
50  
51  
52  
53  
54  
55  
56  
57  
58  
59  
60

| <b>RWG</b> | <b>REM</b> | <b>RJF</b> | <b>RQW</b> | <b>RCB</b> | <b>RF4</b> | <b>RK5</b> | <b>RCD</b> | <b>RBZ</b> |
|------------|------------|------------|------------|------------|------------|------------|------------|------------|
| 274        | 279        | 274        | 282        | 285        | 282        | 290        | 294        | 296        |
| 210        | 224        | 223        | 227        | 228        | 216        | 234        | 229        | 229        |
| 118        | 142        | 129        | 120        | 162        | 136        | 155        | 116        | 120        |
| 35         | 68         | 40         | 41         | 46         | 115        | 36         | 47         | 46         |
| 182        | 176        | 155        | 144        | 211        | 171        | 193        | 144        | 162        |
| 245        | 267        | 262        | 272        | 276        | 271        | 275        | 281        | 278        |
| 217        | 254        | 244        | 239        | 252        | 259        | 250        | 248        | 259        |
| 270        | 271        | 272        | 280        | 284        | 278        | 283        | 293        | 288        |
| 193        | 176        | 210        | 224        | 219        | 192        | 221        | 204        | 247        |
| 234        | 246        | 236        | 241        | 252        | 244        | 249        | 259        | 249        |
| 149        | 161        | 148        | 140        | 184        | 148        | 170        | 130        | 147        |
| 39         | 81         | 49         | 51         | 52         | 128        | 41         | 55         | 59         |
| 235        | 243        | 245        | 258        | 257        | 256        | 264        | 256        | 251        |
| 250        | 259        | 261        | 265        | 273        | 270        | 276        | 278        | 279        |
| 183        | 191        | 179        | 170        | 228        | 182        | 209        | 160        | 170        |
| 187        | 191        | 178        | 168        | 229        | 181        | 209        | 159        | 171        |
| 256        | 272        | 270        | 264        | 280        | 277        | 279        | 288        | 280        |
| 65         | 79         | 146        | 129        | 121        | 128        | 94         | 118        | 154        |
| 185        | 191        | 179        | 171        | 227        | 183        | 207        | 160        | 171        |
| 240        | 231        | 246        | 256        | 256        | 243        | 260        | 246        | 252        |
| 182        | 176        | 192        | 185        | 193        | 168        | 190        | 203        | 236        |
| 168        | 195        | 212        | 217        | 203        | 211        | 208        | 210        | 189        |
| 183        | 181        | 156        | 141        | 213        | 171        | 195        | 145        | 160        |
| 186        | 191        | 179        | 167        | 229        | 183        | 208        | 160        | 170        |
| 235        | 242        | 244        | 255        | 255        | 254        | 261        | 257        | 249        |
| 205        | 203        | 211        | 220        | 222        | 215        | 233        | 213        | 230        |
| 260        | 265        | 269        | 277        | 278        | 271        | 277        | 278        | 285        |
| 163        | 164        | 152        | 138        | 210        | 153        | 187        | 138        | 155        |
| 76         | 93         | 161        | 157        | 132        | 144        | 106        | 133        | 162        |
| 157        | 181        | 183        | 173        | 183        | 187        | 165        | 186        | 178        |
| 176        | 179        | 170        | 160        | 220        | 170        | 194        | 149        | 160        |
| 270        | 273        | 273        | 282        | 283        | 284        | 292        | 289        | 291        |
| 234        | 240        | 244        | 255        | 254        | 250        | 263        | 259        | 248        |
| 184        | 190        | 177        | 171        | 228        | 181        | 208        | 160        | 171        |
| 200        | 198        | 186        | 213        | 212        | 220        | 213        | 233        | 222        |
| 111        | 107        | 124        | 117        | 131        | 160        | 121        | 140        | 117        |
| 82         | 101        | 81         | 70         | 83         | 101        | 71         | 91         | 87         |
| 176        | 188        | 165        | 162        | 224        | 173        | 201        | 156        | 170        |
| 185        | 190        | 179        | 171        | 227        | 182        | 206        | 159        | 168        |
| 139        | 169        | 153        | 146        | 136        | 153        | 133        | 166        | 152        |
| 270        | 273        | 270        | 281        | 285        | 283        | 285        | 293        | 290        |
| 210        | 210        | 193        | 228        | 223        | 232        | 219        | 247        | 236        |
| 113        | 165        | 150        | 137        | 137        | 161        | 146        | 153        | 128        |
| 254        | 255        | 263        | 262        | 266        | 270        | 278        | 274        | 267        |
| 239        | 222        | 251        | 251        | 238        | 225        | 243        | 243        | 267        |

|    |     |     |     |     |     |     |     |     |     |
|----|-----|-----|-----|-----|-----|-----|-----|-----|-----|
| 1  |     |     |     |     |     |     |     |     |     |
| 2  | 204 | 245 | 240 | 263 | 233 | 251 | 246 | 254 | 251 |
| 3  | 262 | 266 | 261 | 264 | 272 | 279 | 283 | 286 | 279 |
| 4  | 198 | 202 | 185 | 203 | 211 | 203 | 205 | 228 | 200 |
| 5  | 185 | 191 | 177 | 167 | 225 | 181 | 208 | 158 | 170 |
| 6  | 264 | 274 | 269 | 282 | 284 | 276 | 286 | 290 | 292 |
| 7  | 259 | 260 | 262 | 269 | 274 | 272 | 275 | 271 | 282 |
| 8  |     |     |     |     |     |     |     |     |     |
| 9  |     |     |     |     |     |     |     |     |     |
| 10 |     |     |     |     |     |     |     |     |     |
| 11 |     |     |     |     |     |     |     |     |     |
| 12 |     |     |     |     |     |     |     |     |     |
| 13 |     |     |     |     |     |     |     |     |     |
| 14 |     |     |     |     |     |     |     |     |     |
| 15 |     |     |     |     |     |     |     |     |     |
| 16 |     |     |     |     |     |     |     |     |     |
| 17 |     |     |     |     |     |     |     |     |     |
| 18 |     |     |     |     |     |     |     |     |     |
| 19 |     |     |     |     |     |     |     |     |     |
| 20 |     |     |     |     |     |     |     |     |     |
| 21 |     |     |     |     |     |     |     |     |     |
| 22 |     |     |     |     |     |     |     |     |     |
| 23 |     |     |     |     |     |     |     |     |     |
| 24 |     |     |     |     |     |     |     |     |     |
| 25 |     |     |     |     |     |     |     |     |     |
| 26 |     |     |     |     |     |     |     |     |     |
| 27 |     |     |     |     |     |     |     |     |     |
| 28 |     |     |     |     |     |     |     |     |     |
| 29 |     |     |     |     |     |     |     |     |     |
| 30 |     |     |     |     |     |     |     |     |     |
| 31 |     |     |     |     |     |     |     |     |     |
| 32 |     |     |     |     |     |     |     |     |     |
| 33 |     |     |     |     |     |     |     |     |     |
| 34 |     |     |     |     |     |     |     |     |     |
| 35 |     |     |     |     |     |     |     |     |     |
| 36 |     |     |     |     |     |     |     |     |     |
| 37 |     |     |     |     |     |     |     |     |     |
| 38 |     |     |     |     |     |     |     |     |     |
| 39 |     |     |     |     |     |     |     |     |     |
| 40 |     |     |     |     |     |     |     |     |     |
| 41 |     |     |     |     |     |     |     |     |     |
| 42 |     |     |     |     |     |     |     |     |     |
| 43 |     |     |     |     |     |     |     |     |     |
| 44 |     |     |     |     |     |     |     |     |     |
| 45 |     |     |     |     |     |     |     |     |     |
| 46 |     |     |     |     |     |     |     |     |     |
| 47 |     |     |     |     |     |     |     |     |     |
| 48 |     |     |     |     |     |     |     |     |     |
| 49 |     |     |     |     |     |     |     |     |     |
| 50 |     |     |     |     |     |     |     |     |     |
| 51 |     |     |     |     |     |     |     |     |     |
| 52 |     |     |     |     |     |     |     |     |     |
| 53 |     |     |     |     |     |     |     |     |     |
| 54 |     |     |     |     |     |     |     |     |     |
| 55 |     |     |     |     |     |     |     |     |     |
| 56 |     |     |     |     |     |     |     |     |     |
| 57 |     |     |     |     |     |     |     |     |     |
| 58 |     |     |     |     |     |     |     |     |     |
| 59 |     |     |     |     |     |     |     |     |     |
| 60 |     |     |     |     |     |     |     |     |     |

For peer review only

1  
2  
3  
4  
5  
6  
7  
8  
9  
10  
11  
12  
13  
14  
15  
16  
17  
18  
19  
20  
21  
22  
23  
24  
25  
26  
27  
28  
29  
30  
31  
32  
33  
34  
35  
36  
37  
38  
39  
40  
41  
42  
43  
44  
45  
46  
47  
48  
49  
50  
51  
52  
53  
54  
55  
56  
57  
58  
59  
60

| <b>RTP</b> | <b>RWJ</b> | <b>RC9</b> | <b>RGP</b> | <b>RD8</b> | <b>RBD</b> | <b>RNQ</b> | <b>RP5</b> | <b>RVJ</b> |
|------------|------------|------------|------------|------------|------------|------------|------------|------------|
| 306        | 305        | 306        | 308        | 315        | 321        | 324        | 337        | 350        |
| 237        | 227        | 251        | 251        | 249        | 256        | 263        | 274        | 290        |
| 95         | 165        | 122        | 133        | 127        | 116        | 141        | 150        | 172        |
| 79         | 47         | 55         | 45         | 44         | 39         | 69         | 44         | 82         |
| 159        | 205        | 182        | 142        | 161        | 164        | 175        | 174        | 275        |
| 294        | 285        | 294        | 295        | 306        | 299        | 307        | 313        | 335        |
| 272        | 260        | 272        | 268        | 288        | 270        | 288        | 292        | 304        |
| 306        | 304        | 302        | 308        | 312        | 315        | 320        | 331        | 345        |
| 230        | 259        | 212        | 239        | 235        | 238        | 224        | 243        | 254        |
| 266        | 272        | 278        | 255        | 267        | 262        | 278        | 289        | 311        |
| 117        | 182        | 155        | 160        | 148        | 135        | 152        | 179        | 202        |
| 96         | 50         | 59         | 59         | 56         | 49         | 79         | 53         | 95         |
| 269        | 269        | 271        | 279        | 269        | 272        | 288        | 289        | 310        |
| 298        | 283        | 298        | 294        | 303        | 293        | 311        | 319        | 335        |
| 149        | 227        | 182        | 184        | 181        | 166        | 191        | 216        | 241        |
| 147        | 225        | 182        | 182        | 183        | 167        | 191        | 215        | 244        |
| 299        | 294        | 297        | 292        | 302        | 303        | 313        | 318        | 333        |
| 147        | 66         | 139        | 133        | 178        | 128        | 165        | 106        | 74         |
| 150        | 227        | 182        | 184        | 183        | 167        | 192        | 215        | 243        |
| 276        | 263        | 273        | 265        | 274        | 272        | 277        | 293        | 311        |
| 198        | 205        | 201        | 206        | 221        | 225        | 208        | 219        | 234        |
| 224        | 194        | 223        | 226        | 232        | 234        | 249        | 235        | 244        |
| 158        | 208        | 184        | 141        | 164        | 164        | 174        | 177        | 277        |
| 150        | 226        | 182        | 183        | 183        | 166        | 191        | 213        | 244        |
| 267        | 267        | 271        | 281        | 269        | 274        | 290        | 286        | 309        |
| 230        | 238        | 247        | 236        | 227        | 247        | 250        | 249        | 269        |
| 289        | 291        | 303        | 298        | 306        | 309        | 313        | 320        | 327        |
| 121        | 192        | 163        | 159        | 157        | 144        | 171        | 202        | 219        |
| 163        | 71         | 158        | 152        | 192        | 142        | 184        | 122        | 85         |
| 193        | 182        | 216        | 195        | 221        | 193        | 209        | 200        | 235        |
| 133        | 213        | 169        | 171        | 173        | 156        | 173        | 195        | 233        |
| 302        | 298        | 308        | 307        | 313        | 316        | 320        | 336        | 341        |
| 270        | 266        | 268        | 281        | 266        | 271        | 286        | 279        | 302        |
| 150        | 225        | 181        | 183        | 182        | 165        | 190        | 213        | 243        |
| 234        | 224        | 249        | 215        | 212        | 242        | 237        | 236        | 259        |
| 136        | 112        | 150        | 125        | 155        | 137        | 136        | 144        | 148        |
| 75         | 108        | 121        | 86         | 90         | 98         | 83         | 119        | 109        |
| 141        | 216        | 173        | 170        | 172        | 160        | 185        | 202        | 236        |
| 149        | 225        | 180        | 182        | 180        | 166        | 190        | 215        | 240        |
| 148        | 165        | 199        | 159        | 135        | 173        | 151        | 210        | 151        |
| 303        | 298        | 306        | 305        | 313        | 314        | 323        | 329        | 344        |
| 239        | 231        | 260        | 223        | 217        | 252        | 258        | 248        | 263        |
| 130        | 128        | 168        | 175        | 159        | 169        | 164        | 177        | 144        |
| 289        | 282        | 285        | 292        | 299        | 299        | 298        | 323        | 335        |
| 273        | 268        | 274        | 232        | 272        | 253        | 267        | 262        | 291        |

|    |     |     |     |     |     |     |     |     |     |
|----|-----|-----|-----|-----|-----|-----|-----|-----|-----|
| 1  |     |     |     |     |     |     |     |     |     |
| 2  | 277 | 233 | 273 | 272 | 273 | 259 | 277 | 276 | 281 |
| 3  | 293 | 289 | 299 | 284 | 296 | 307 | 315 | 319 | 330 |
| 4  | 209 | 201 | 239 | 234 | 233 | 226 | 239 | 249 | 282 |
| 5  | 149 | 222 | 178 | 181 | 182 | 164 | 187 | 215 | 238 |
| 6  | 304 | 298 | 302 | 298 | 309 | 314 | 317 | 331 | 340 |
| 7  | 292 | 285 | 290 | 292 | 298 | 302 | 312 | 318 | 329 |
| 8  |     |     |     |     |     |     |     |     |     |
| 9  |     |     |     |     |     |     |     |     |     |
| 10 |     |     |     |     |     |     |     |     |     |
| 11 |     |     |     |     |     |     |     |     |     |
| 12 |     |     |     |     |     |     |     |     |     |
| 13 |     |     |     |     |     |     |     |     |     |
| 14 |     |     |     |     |     |     |     |     |     |
| 15 |     |     |     |     |     |     |     |     |     |
| 16 |     |     |     |     |     |     |     |     |     |
| 17 |     |     |     |     |     |     |     |     |     |
| 18 |     |     |     |     |     |     |     |     |     |
| 19 |     |     |     |     |     |     |     |     |     |
| 20 |     |     |     |     |     |     |     |     |     |
| 21 |     |     |     |     |     |     |     |     |     |
| 22 |     |     |     |     |     |     |     |     |     |
| 23 |     |     |     |     |     |     |     |     |     |
| 24 |     |     |     |     |     |     |     |     |     |
| 25 |     |     |     |     |     |     |     |     |     |
| 26 |     |     |     |     |     |     |     |     |     |
| 27 |     |     |     |     |     |     |     |     |     |
| 28 |     |     |     |     |     |     |     |     |     |
| 29 |     |     |     |     |     |     |     |     |     |
| 30 |     |     |     |     |     |     |     |     |     |
| 31 |     |     |     |     |     |     |     |     |     |
| 32 |     |     |     |     |     |     |     |     |     |
| 33 |     |     |     |     |     |     |     |     |     |
| 34 |     |     |     |     |     |     |     |     |     |
| 35 |     |     |     |     |     |     |     |     |     |
| 36 |     |     |     |     |     |     |     |     |     |
| 37 |     |     |     |     |     |     |     |     |     |
| 38 |     |     |     |     |     |     |     |     |     |
| 39 |     |     |     |     |     |     |     |     |     |
| 40 |     |     |     |     |     |     |     |     |     |
| 41 |     |     |     |     |     |     |     |     |     |
| 42 |     |     |     |     |     |     |     |     |     |
| 43 |     |     |     |     |     |     |     |     |     |
| 44 |     |     |     |     |     |     |     |     |     |
| 45 |     |     |     |     |     |     |     |     |     |
| 46 |     |     |     |     |     |     |     |     |     |
| 47 |     |     |     |     |     |     |     |     |     |
| 48 |     |     |     |     |     |     |     |     |     |
| 49 |     |     |     |     |     |     |     |     |     |
| 50 |     |     |     |     |     |     |     |     |     |
| 51 |     |     |     |     |     |     |     |     |     |
| 52 |     |     |     |     |     |     |     |     |     |
| 53 |     |     |     |     |     |     |     |     |     |
| 54 |     |     |     |     |     |     |     |     |     |
| 55 |     |     |     |     |     |     |     |     |     |
| 56 |     |     |     |     |     |     |     |     |     |
| 57 |     |     |     |     |     |     |     |     |     |
| 58 |     |     |     |     |     |     |     |     |     |
| 59 |     |     |     |     |     |     |     |     |     |
| 60 |     |     |     |     |     |     |     |     |     |

For peer review only

1  
2  
3  
4  
5  
6  
7  
8  
9  
10  
11  
12  
13  
14  
15  
16  
17  
18  
19  
20  
21  
22  
23  
24  
25  
26  
27  
28  
29  
30  
31  
32  
33  
34  
35  
36  
37  
38  
39  
40  
41  
42  
43  
44  
45  
46  
47  
48  
49  
50  
51  
52  
53  
54  
55  
56  
57  
58  
59  
60

|    | RW3 | RJC | RAE | RBL | RGR | RQ6 | R1K | RN7 | RHW |
|----|-----|-----|-----|-----|-----|-----|-----|-----|-----|
| 10 | 349 | 347 | 372 | 377 | 383 | 387 | 390 | 395 | 394 |
| 11 | 290 | 270 | 299 | 287 | 286 | 321 | 297 | 312 | 319 |
| 12 | 174 | 126 | 205 | 172 | 151 | 177 | 166 | 152 | 180 |
| 13 | 47  | 59  | 51  | 80  | 63  | 98  | 66  | 61  | 189 |
| 14 | 169 | 161 | 247 | 205 | 209 | 217 | 214 | 181 | 236 |
| 15 | 329 | 335 | 353 | 349 | 355 | 377 | 366 | 376 | 389 |
| 16 | 292 | 312 | 334 | 311 | 331 | 360 | 340 | 345 | 366 |
| 17 | 342 | 341 | 368 | 367 | 374 | 385 | 384 | 387 | 395 |
| 18 | 247 | 235 | 262 | 282 | 283 | 259 | 263 | 264 | 273 |
| 19 | 296 | 292 | 312 | 338 | 325 | 359 | 336 | 341 | 357 |
| 20 | 200 | 146 | 222 | 183 | 179 | 200 | 189 | 178 | 220 |
| 21 | 51  | 66  | 56  | 93  | 69  | 110 | 69  | 71  | 219 |
| 22 | 274 | 283 | 320 | 331 | 321 | 300 | 329 | 327 | 361 |
| 23 | 317 | 338 | 350 | 352 | 356 | 369 | 362 | 373 | 387 |
| 24 | 232 | 180 | 268 | 239 | 227 | 241 | 221 | 205 | 257 |
| 25 | 232 | 182 | 272 | 243 | 227 | 242 | 223 | 204 | 258 |
| 26 | 327 | 338 | 352 | 350 | 365 | 375 | 369 | 366 | 395 |
| 27 | 124 | 189 | 143 | 103 | 177 | 92  | 174 | 179 | 152 |
| 28 | 231 | 181 | 272 | 244 | 227 | 240 | 223 | 206 | 258 |
| 29 | 296 | 306 | 334 | 341 | 345 | 343 | 330 | 347 | 350 |
| 30 | 220 | 238 | 232 | 244 | 264 | 245 | 256 | 260 | 284 |
| 31 | 240 | 268 | 268 | 269 | 265 | 280 | 280 | 273 | 293 |
| 32 | 169 | 161 | 249 | 211 | 211 | 218 | 214 | 183 | 236 |
| 33 | 232 | 180 | 271 | 242 | 227 | 240 | 226 | 206 | 259 |
| 34 | 267 | 283 | 320 | 332 | 315 | 298 | 327 | 323 | 360 |
| 35 | 256 | 271 | 284 | 299 | 289 | 311 | 285 | 295 | 297 |
| 36 | 333 | 330 | 361 | 358 | 368 | 377 | 364 | 380 | 390 |
| 37 | 208 | 148 | 243 | 205 | 187 | 217 | 193 | 176 | 219 |
| 38 | 132 | 208 | 153 | 118 | 195 | 101 | 185 | 203 | 174 |
| 39 | 225 | 225 | 246 | 214 | 222 | 251 | 251 | 237 | 274 |
| 40 | 213 | 171 | 243 | 234 | 216 | 230 | 210 | 191 | 241 |
| 41 | 341 | 341 | 368 | 366 | 375 | 384 | 387 | 380 | 395 |
| 42 | 273 | 283 | 315 | 330 | 320 | 295 | 324 | 321 | 356 |
| 43 | 231 | 180 | 269 | 243 | 226 | 240 | 223 | 205 | 259 |
| 44 | 269 | 252 | 245 | 255 | 271 | 293 | 284 | 274 | 304 |
| 45 | 155 | 171 | 169 | 138 | 147 | 160 | 200 | 174 | 183 |
| 46 | 114 | 80  | 129 | 107 | 100 | 130 | 143 | 109 | 129 |
| 47 | 219 | 179 | 263 | 233 | 215 | 236 | 213 | 195 | 248 |
| 48 | 232 | 179 | 269 | 243 | 226 | 241 | 222 | 206 | 256 |
| 49 | 192 | 141 | 208 | 175 | 160 | 210 | 213 | 209 | 216 |
| 50 | 342 | 348 | 364 | 374 | 376 | 387 | 377 | 389 | 398 |
| 51 | 282 | 256 | 250 | 265 | 283 | 315 | 298 | 295 | 325 |
| 52 | 198 | 179 | 210 | 166 | 164 | 211 | 211 | 187 | 170 |
| 53 | 322 | 326 | 354 | 352 | 348 | 370 | 339 | 367 | 361 |
| 54 | 287 | 280 | 283 | 301 | 308 | 337 | 336 | 338 | 341 |

|    |     |     |     |     |     |     |     |     |     |
|----|-----|-----|-----|-----|-----|-----|-----|-----|-----|
| 1  |     |     |     |     |     |     |     |     |     |
| 2  | 274 | 317 | 323 | 327 | 331 | 337 | 320 | 338 | 347 |
| 3  | 334 | 333 | 345 | 351 | 360 | 372 | 364 | 365 | 383 |
| 4  | 247 | 265 | 280 | 264 | 243 | 272 | 278 | 262 | 296 |
| 5  | 229 | 180 | 266 | 241 | 224 | 239 | 218 | 205 | 256 |
| 6  | 345 | 344 | 364 | 371 | 374 | 385 | 378 | 383 | 396 |
| 7  | 330 | 327 | 348 | 354 | 369 | 368 | 354 | 373 | 387 |
| 8  |     |     |     |     |     |     |     |     |     |
| 9  |     |     |     |     |     |     |     |     |     |
| 10 |     |     |     |     |     |     |     |     |     |
| 11 |     |     |     |     |     |     |     |     |     |
| 12 |     |     |     |     |     |     |     |     |     |
| 13 |     |     |     |     |     |     |     |     |     |
| 14 |     |     |     |     |     |     |     |     |     |
| 15 |     |     |     |     |     |     |     |     |     |
| 16 |     |     |     |     |     |     |     |     |     |
| 17 |     |     |     |     |     |     |     |     |     |
| 18 |     |     |     |     |     |     |     |     |     |
| 19 |     |     |     |     |     |     |     |     |     |
| 20 |     |     |     |     |     |     |     |     |     |
| 21 |     |     |     |     |     |     |     |     |     |
| 22 |     |     |     |     |     |     |     |     |     |
| 23 |     |     |     |     |     |     |     |     |     |
| 24 |     |     |     |     |     |     |     |     |     |
| 25 |     |     |     |     |     |     |     |     |     |
| 26 |     |     |     |     |     |     |     |     |     |
| 27 |     |     |     |     |     |     |     |     |     |
| 28 |     |     |     |     |     |     |     |     |     |
| 29 |     |     |     |     |     |     |     |     |     |
| 30 |     |     |     |     |     |     |     |     |     |
| 31 |     |     |     |     |     |     |     |     |     |
| 32 |     |     |     |     |     |     |     |     |     |
| 33 |     |     |     |     |     |     |     |     |     |
| 34 |     |     |     |     |     |     |     |     |     |
| 35 |     |     |     |     |     |     |     |     |     |
| 36 |     |     |     |     |     |     |     |     |     |
| 37 |     |     |     |     |     |     |     |     |     |
| 38 |     |     |     |     |     |     |     |     |     |
| 39 |     |     |     |     |     |     |     |     |     |
| 40 |     |     |     |     |     |     |     |     |     |
| 41 |     |     |     |     |     |     |     |     |     |
| 42 |     |     |     |     |     |     |     |     |     |
| 43 |     |     |     |     |     |     |     |     |     |
| 44 |     |     |     |     |     |     |     |     |     |
| 45 |     |     |     |     |     |     |     |     |     |
| 46 |     |     |     |     |     |     |     |     |     |
| 47 |     |     |     |     |     |     |     |     |     |
| 48 |     |     |     |     |     |     |     |     |     |
| 49 |     |     |     |     |     |     |     |     |     |
| 50 |     |     |     |     |     |     |     |     |     |
| 51 |     |     |     |     |     |     |     |     |     |
| 52 |     |     |     |     |     |     |     |     |     |
| 53 |     |     |     |     |     |     |     |     |     |
| 54 |     |     |     |     |     |     |     |     |     |
| 55 |     |     |     |     |     |     |     |     |     |
| 56 |     |     |     |     |     |     |     |     |     |
| 57 |     |     |     |     |     |     |     |     |     |
| 58 |     |     |     |     |     |     |     |     |     |
| 59 |     |     |     |     |     |     |     |     |     |
| 60 |     |     |     |     |     |     |     |     |     |

For peer review only



1  
2  
3  
4  
5  
6  
7  
8  
9  
10  
11  
12  
13  
14  
15  
16  
17  
18  
19  
20  
21  
22  
23  
24  
25  
26  
27  
28  
29  
30  
31  
32  
33  
34  
35  
36  
37  
38  
39  
40  
41  
42  
43  
44  
45  
46  
47  
48  
49  
50  
51  
52  
53  
54  
55  
56  
57  
58  
59  
60

| RNL | RCX | RPA | RWH | RM2 | RR7 | RNS | RN3 | RGN |
|-----|-----|-----|-----|-----|-----|-----|-----|-----|
| 406 | 407 | 409 | 421 | 423 | 428 | 432 | 425 | 432 |
| 318 | 319 | 343 | 332 | 338 | 342 | 347 | 358 | 329 |
| 164 | 179 | 184 | 216 | 242 | 189 | 207 | 202 | 201 |
| 97  | 70  | 76  | 130 | 74  | 102 | 108 | 71  | 95  |
| 193 | 208 | 218 | 232 | 336 | 248 | 212 | 244 | 252 |
| 383 | 374 | 397 | 405 | 402 | 416 | 422 | 409 | 405 |
| 363 | 341 | 374 | 382 | 373 | 382 | 393 | 384 | 366 |
| 399 | 399 | 401 | 418 | 414 | 419 | 429 | 422 | 431 |
| 297 | 305 | 292 | 320 | 249 | 290 | 307 | 297 | 327 |
| 355 | 341 | 351 | 369 | 373 | 396 | 397 | 364 | 381 |
| 188 | 186 | 221 | 251 | 280 | 206 | 233 | 222 | 224 |
| 119 | 84  | 93  | 168 | 87  | 114 | 123 | 82  | 113 |
| 343 | 366 | 379 | 375 | 377 | 383 | 381 | 396 | 393 |
| 382 | 374 | 398 | 402 | 399 | 412 | 418 | 409 | 397 |
| 225 | 231 | 266 | 293 | 330 | 251 | 269 | 288 | 275 |
| 225 | 235 | 265 | 291 | 331 | 249 | 269 | 289 | 276 |
| 388 | 387 | 394 | 403 | 409 | 409 | 416 | 406 | 405 |
| 196 | 184 | 199 | 172 | 114 | 179 | 251 | 245 | 176 |
| 226 | 232 | 265 | 290 | 329 | 250 | 270 | 288 | 277 |
| 353 | 351 | 382 | 374 | 366 | 355 | 389 | 386 | 382 |
| 311 | 245 | 262 | 298 | 296 | 314 | 301 | 297 | 277 |
| 326 | 288 | 292 | 308 | 279 | 320 | 338 | 323 | 323 |
| 194 | 210 | 220 | 230 | 335 | 248 | 212 | 247 | 256 |
| 226 | 233 | 266 | 295 | 331 | 253 | 269 | 289 | 275 |
| 343 | 364 | 376 | 376 | 373 | 383 | 376 | 395 | 395 |
| 322 | 303 | 325 | 325 | 326 | 315 | 342 | 313 | 333 |
| 390 | 385 | 398 | 409 | 407 | 403 | 419 | 409 | 415 |
| 197 | 198 | 230 | 249 | 308 | 231 | 243 | 248 | 236 |
| 216 | 198 | 226 | 199 | 123 | 204 | 271 | 274 | 204 |
| 261 | 254 | 268 | 294 | 273 | 299 | 306 | 302 | 260 |
| 215 | 221 | 247 | 265 | 308 | 233 | 258 | 264 | 264 |
| 395 | 396 | 406 | 413 | 420 | 423 | 427 | 421 | 428 |
| 343 | 357 | 376 | 370 | 375 | 374 | 374 | 391 | 389 |
| 225 | 228 | 265 | 293 | 330 | 250 | 271 | 290 | 274 |
| 288 | 266 | 291 | 302 | 306 | 329 | 336 | 307 | 299 |
| 180 | 182 | 198 | 222 | 185 | 212 | 207 | 211 | 177 |
| 111 | 106 | 110 | 131 | 160 | 129 | 144 | 115 | 105 |
| 214 | 226 | 250 | 286 | 317 | 241 | 257 | 279 | 267 |
| 222 | 230 | 266 | 292 | 329 | 248 | 267 | 289 | 274 |
| 187 | 203 | 213 | 199 | 229 | 214 | 249 | 230 | 179 |
| 402 | 397 | 409 | 416 | 417 | 418 | 425 | 421 | 426 |
| 304 | 281 | 307 | 323 | 322 | 349 | 355 | 320 | 305 |
| 206 | 206 | 221 | 221 | 227 | 223 | 226 | 235 | 189 |
| 380 | 380 | 378 | 386 | 393 | 400 | 422 | 399 | 394 |
| 320 | 309 | 368 | 363 | 337 | 367 | 390 | 384 | 369 |

|    |     |     |     |     |     |     |     |     |     |
|----|-----|-----|-----|-----|-----|-----|-----|-----|-----|
| 1  |     |     |     |     |     |     |     |     |     |
| 2  | 364 | 349 | 365 | 368 | 345 | 379 | 392 | 388 | 363 |
| 3  | 383 | 388 | 393 | 400 | 412 | 412 | 418 | 405 | 407 |
| 4  | 295 | 281 | 317 | 324 | 299 | 316 | 313 | 337 | 314 |
| 5  | 224 | 230 | 261 | 287 | 322 | 246 | 267 | 289 | 273 |
| 6  | 399 | 394 | 403 | 413 | 417 | 418 | 426 | 416 | 421 |
| 7  | 381 | 382 | 398 | 401 | 401 | 407 | 414 | 408 | 412 |
| 8  |     |     |     |     |     |     |     |     |     |
| 9  |     |     |     |     |     |     |     |     |     |
| 10 |     |     |     |     |     |     |     |     |     |
| 11 |     |     |     |     |     |     |     |     |     |
| 12 |     |     |     |     |     |     |     |     |     |
| 13 |     |     |     |     |     |     |     |     |     |
| 14 |     |     |     |     |     |     |     |     |     |
| 15 |     |     |     |     |     |     |     |     |     |
| 16 |     |     |     |     |     |     |     |     |     |
| 17 |     |     |     |     |     |     |     |     |     |
| 18 |     |     |     |     |     |     |     |     |     |
| 19 |     |     |     |     |     |     |     |     |     |
| 20 |     |     |     |     |     |     |     |     |     |
| 21 |     |     |     |     |     |     |     |     |     |
| 22 |     |     |     |     |     |     |     |     |     |
| 23 |     |     |     |     |     |     |     |     |     |
| 24 |     |     |     |     |     |     |     |     |     |
| 25 |     |     |     |     |     |     |     |     |     |
| 26 |     |     |     |     |     |     |     |     |     |
| 27 |     |     |     |     |     |     |     |     |     |
| 28 |     |     |     |     |     |     |     |     |     |
| 29 |     |     |     |     |     |     |     |     |     |
| 30 |     |     |     |     |     |     |     |     |     |
| 31 |     |     |     |     |     |     |     |     |     |
| 32 |     |     |     |     |     |     |     |     |     |
| 33 |     |     |     |     |     |     |     |     |     |
| 34 |     |     |     |     |     |     |     |     |     |
| 35 |     |     |     |     |     |     |     |     |     |
| 36 |     |     |     |     |     |     |     |     |     |
| 37 |     |     |     |     |     |     |     |     |     |
| 38 |     |     |     |     |     |     |     |     |     |
| 39 |     |     |     |     |     |     |     |     |     |
| 40 |     |     |     |     |     |     |     |     |     |
| 41 |     |     |     |     |     |     |     |     |     |
| 42 |     |     |     |     |     |     |     |     |     |
| 43 |     |     |     |     |     |     |     |     |     |
| 44 |     |     |     |     |     |     |     |     |     |
| 45 |     |     |     |     |     |     |     |     |     |
| 46 |     |     |     |     |     |     |     |     |     |
| 47 |     |     |     |     |     |     |     |     |     |
| 48 |     |     |     |     |     |     |     |     |     |
| 49 |     |     |     |     |     |     |     |     |     |
| 50 |     |     |     |     |     |     |     |     |     |
| 51 |     |     |     |     |     |     |     |     |     |
| 52 |     |     |     |     |     |     |     |     |     |
| 53 |     |     |     |     |     |     |     |     |     |
| 54 |     |     |     |     |     |     |     |     |     |
| 55 |     |     |     |     |     |     |     |     |     |
| 56 |     |     |     |     |     |     |     |     |     |
| 57 |     |     |     |     |     |     |     |     |     |
| 58 |     |     |     |     |     |     |     |     |     |
| 59 |     |     |     |     |     |     |     |     |     |
| 60 |     |     |     |     |     |     |     |     |     |

For peer review only

1  
2  
3  
4  
5  
6  
7  
8  
9  
10  
11  
12  
13  
14  
15  
16  
17  
18  
19  
20  
21  
22  
23  
24  
25  
26  
27  
28  
29  
30  
31  
32  
33  
34  
35  
36  
37  
38  
39  
40  
41  
42  
43  
44  
45  
46  
47  
48  
49  
50  
51  
52  
53  
54  
55  
56  
57  
58  
59  
60

| RVW | RNZ | RDE | RLN | RWY | RGQ | RXP | RXH | RXK |
|-----|-----|-----|-----|-----|-----|-----|-----|-----|
| 439 | 442 | 446 | 464 | 465 | 479 | 494 | 499 | 500 |
| 375 | 338 | 369 | 391 | 356 | 376 | 401 | 378 | 418 |
| 207 | 171 | 202 | 183 | 172 | 190 | 214 | 226 | 215 |
| 96  | 67  | 110 | 70  | 76  | 127 | 70  | 108 | 104 |
| 234 | 241 | 211 | 210 | 241 | 202 | 244 | 304 | 280 |
| 423 | 419 | 436 | 444 | 440 | 454 | 470 | 462 | 485 |
| 391 | 380 | 411 | 405 | 419 | 409 | 422 | 425 | 460 |
| 431 | 441 | 441 | 453 | 457 | 467 | 488 | 497 | 491 |
| 279 | 311 | 332 | 349 | 341 | 353 | 387 | 349 | 324 |
| 393 | 379 | 402 | 420 | 395 | 386 | 429 | 430 | 446 |
| 235 | 205 | 216 | 215 | 209 | 230 | 227 | 240 | 245 |
| 121 | 77  | 139 | 73  | 90  | 150 | 81  | 130 | 124 |
| 375 | 383 | 384 | 391 | 404 | 408 | 408 | 413 | 437 |
| 419 | 420 | 434 | 443 | 449 | 448 | 475 | 465 | 485 |
| 274 | 252 | 257 | 254 | 270 | 266 | 279 | 307 | 298 |
| 277 | 251 | 258 | 255 | 270 | 268 | 282 | 305 | 299 |
| 412 | 431 | 437 | 441 | 455 | 443 | 462 | 483 | 473 |
| 237 | 193 | 210 | 219 | 235 | 237 | 244 | 156 | 242 |
| 276 | 251 | 257 | 253 | 272 | 269 | 281 | 307 | 299 |
| 385 | 377 | 400 | 411 | 408 | 410 | 436 | 438 | 455 |
| 274 | 282 | 293 | 332 | 295 | 304 | 350 | 310 | 322 |
| 352 | 306 | 336 | 343 | 347 | 373 | 380 | 345 | 355 |
| 234 | 239 | 215 | 212 | 244 | 205 | 243 | 311 | 277 |
| 276 | 252 | 258 | 254 | 274 | 271 | 283 | 310 | 300 |
| 375 | 383 | 379 | 384 | 401 | 406 | 402 | 410 | 434 |
| 331 | 348 | 321 | 352 | 359 | 369 | 375 | 403 | 375 |
| 412 | 428 | 426 | 447 | 449 | 458 | 478 | 473 | 475 |
| 244 | 218 | 221 | 220 | 227 | 221 | 244 | 257 | 268 |
| 261 | 215 | 228 | 231 | 255 | 250 | 274 | 181 | 258 |
| 292 | 275 | 309 | 301 | 294 | 270 | 288 | 306 | 339 |
| 261 | 224 | 242 | 239 | 244 | 248 | 261 | 289 | 276 |
| 431 | 435 | 446 | 457 | 458 | 464 | 482 | 490 | 493 |
| 378 | 379 | 374 | 379 | 405 | 409 | 400 | 410 | 427 |
| 274 | 250 | 257 | 254 | 272 | 270 | 281 | 306 | 299 |
| 331 | 313 | 362 | 345 | 329 | 359 | 384 | 325 | 354 |
| 217 | 183 | 191 | 204 | 223 | 202 | 207 | 208 | 244 |
| 125 | 115 | 132 | 159 | 138 | 122 | 170 | 134 | 153 |
| 266 | 237 | 253 | 241 | 261 | 260 | 279 | 293 | 288 |
| 276 | 250 | 253 | 254 | 271 | 268 | 279 | 306 | 298 |
| 212 | 215 | 214 | 291 | 243 | 222 | 278 | 204 | 254 |
| 432 | 436 | 444 | 455 | 462 | 469 | 486 | 490 | 495 |
| 342 | 326 | 383 | 364 | 338 | 380 | 393 | 346 | 363 |
| 250 | 194 | 209 | 284 | 233 | 212 | 264 | 241 | 307 |
| 425 | 403 | 415 | 439 | 424 | 420 | 462 | 485 | 478 |
| 361 | 365 | 379 | 395 | 385 | 386 | 397 | 405 | 399 |

|    |     |     |     |     |     |     |     |     |     |
|----|-----|-----|-----|-----|-----|-----|-----|-----|-----|
| 1  |     |     |     |     |     |     |     |     |     |
| 2  | 404 | 389 | 395 | 397 | 403 | 438 | 428 | 412 | 421 |
| 3  | 409 | 422 | 439 | 443 | 446 | 455 | 467 | 479 | 476 |
| 4  | 314 | 307 | 356 | 335 | 324 | 356 | 331 | 351 | 375 |
| 5  | 275 | 247 | 250 | 254 | 271 | 264 | 280 | 306 | 300 |
| 6  | 432 | 436 | 444 | 455 | 457 | 471 | 480 | 486 | 491 |
| 7  | 405 | 421 | 429 | 438 | 437 | 453 | 460 | 471 | 458 |
| 8  |     |     |     |     |     |     |     |     |     |
| 9  |     |     |     |     |     |     |     |     |     |
| 10 |     |     |     |     |     |     |     |     |     |
| 11 |     |     |     |     |     |     |     |     |     |
| 12 |     |     |     |     |     |     |     |     |     |
| 13 |     |     |     |     |     |     |     |     |     |
| 14 |     |     |     |     |     |     |     |     |     |
| 15 |     |     |     |     |     |     |     |     |     |
| 16 |     |     |     |     |     |     |     |     |     |
| 17 |     |     |     |     |     |     |     |     |     |
| 18 |     |     |     |     |     |     |     |     |     |
| 19 |     |     |     |     |     |     |     |     |     |
| 20 |     |     |     |     |     |     |     |     |     |
| 21 |     |     |     |     |     |     |     |     |     |
| 22 |     |     |     |     |     |     |     |     |     |
| 23 |     |     |     |     |     |     |     |     |     |
| 24 |     |     |     |     |     |     |     |     |     |
| 25 |     |     |     |     |     |     |     |     |     |
| 26 |     |     |     |     |     |     |     |     |     |
| 27 |     |     |     |     |     |     |     |     |     |
| 28 |     |     |     |     |     |     |     |     |     |
| 29 |     |     |     |     |     |     |     |     |     |
| 30 |     |     |     |     |     |     |     |     |     |
| 31 |     |     |     |     |     |     |     |     |     |
| 32 |     |     |     |     |     |     |     |     |     |
| 33 |     |     |     |     |     |     |     |     |     |
| 34 |     |     |     |     |     |     |     |     |     |
| 35 |     |     |     |     |     |     |     |     |     |
| 36 |     |     |     |     |     |     |     |     |     |
| 37 |     |     |     |     |     |     |     |     |     |
| 38 |     |     |     |     |     |     |     |     |     |
| 39 |     |     |     |     |     |     |     |     |     |
| 40 |     |     |     |     |     |     |     |     |     |
| 41 |     |     |     |     |     |     |     |     |     |
| 42 |     |     |     |     |     |     |     |     |     |
| 43 |     |     |     |     |     |     |     |     |     |
| 44 |     |     |     |     |     |     |     |     |     |
| 45 |     |     |     |     |     |     |     |     |     |
| 46 |     |     |     |     |     |     |     |     |     |
| 47 |     |     |     |     |     |     |     |     |     |
| 48 |     |     |     |     |     |     |     |     |     |
| 49 |     |     |     |     |     |     |     |     |     |
| 50 |     |     |     |     |     |     |     |     |     |
| 51 |     |     |     |     |     |     |     |     |     |
| 52 |     |     |     |     |     |     |     |     |     |
| 53 |     |     |     |     |     |     |     |     |     |
| 54 |     |     |     |     |     |     |     |     |     |
| 55 |     |     |     |     |     |     |     |     |     |
| 56 |     |     |     |     |     |     |     |     |     |
| 57 |     |     |     |     |     |     |     |     |     |
| 58 |     |     |     |     |     |     |     |     |     |
| 59 |     |     |     |     |     |     |     |     |     |
| 60 |     |     |     |     |     |     |     |     |     |

For peer review only

1  
2  
3  
4  
5  
6  
7  
8  
9  
10  
11  
12  
13  
14  
15  
16  
17  
18  
19  
20  
21  
22  
23  
24  
25  
26  
27  
28  
29  
30  
31  
32  
33  
34  
35  
36  
37  
38  
39  
40  
41  
42  
43  
44  
45  
46  
47  
48  
49  
50  
51  
52  
53  
54  
55  
56  
57  
58  
59  
60

|    | RD1 | RJL | RXF | RQ8 | RXQ | RTF | RD3 | RW6 | RNA |
|----|-----|-----|-----|-----|-----|-----|-----|-----|-----|
| 10 | 496 | 507 | 511 | 517 | 519 | 530 | 538 | 543 | 547 |
| 11 | 400 | 403 | 440 | 422 | 414 | 439 | 432 | 437 | 440 |
| 12 | 200 | 241 | 233 | 232 | 203 | 191 | 234 | 220 | 245 |
| 13 | 118 | 83  | 82  | 74  | 54  | 96  | 153 | 100 | 67  |
| 14 | 263 | 256 | 264 | 309 | 284 | 219 | 274 | 237 | 301 |
| 15 | 473 | 492 | 482 | 483 | 491 | 515 | 513 | 507 | 512 |
| 16 | 443 | 455 | 462 | 448 | 459 | 484 | 484 | 478 | 478 |
| 17 | 494 | 502 | 499 | 511 | 512 | 522 | 528 | 528 | 536 |
| 18 | 362 | 394 | 379 | 383 | 389 | 396 | 397 | 426 | 395 |
| 19 | 435 | 444 | 452 | 445 | 436 | 464 | 454 | 468 | 477 |
| 20 | 242 | 259 | 276 | 263 | 243 | 213 | 290 | 246 | 271 |
| 21 | 141 | 95  | 88  | 84  | 59  | 119 | 185 | 125 | 81  |
| 22 | 395 | 452 | 424 | 446 | 451 | 430 | 473 | 458 | 476 |
| 23 | 478 | 490 | 486 | 500 | 497 | 515 | 515 | 505 | 515 |
| 24 | 295 | 312 | 320 | 305 | 308 | 258 | 337 | 299 | 326 |
| 25 | 297 | 312 | 321 | 307 | 306 | 258 | 338 | 301 | 329 |
| 26 | 480 | 489 | 491 | 500 | 504 | 516 | 523 | 517 | 524 |
| 27 | 205 | 289 | 284 | 244 | 263 | 321 | 266 | 166 | 285 |
| 28 | 299 | 311 | 316 | 305 | 307 | 260 | 340 | 301 | 328 |
| 29 | 457 | 432 | 457 | 450 | 443 | 446 | 461 | 486 | 480 |
| 30 | 353 | 321 | 351 | 332 | 343 | 395 | 371 | 373 | 349 |
| 31 | 336 | 398 | 396 | 401 | 381 | 426 | 392 | 389 | 418 |
| 32 | 265 | 257 | 272 | 311 | 290 | 220 | 275 | 238 | 306 |
| 33 | 297 | 311 | 321 | 307 | 309 | 260 | 337 | 298 | 329 |
| 34 | 396 | 453 | 425 | 448 | 451 | 420 | 475 | 455 | 475 |
| 35 | 375 | 388 | 393 | 416 | 410 | 413 | 411 | 408 | 418 |
| 36 | 483 | 478 | 494 | 496 | 497 | 526 | 515 | 518 | 525 |
| 37 | 260 | 273 | 272 | 257 | 254 | 232 | 288 | 260 | 262 |
| 38 | 228 | 315 | 316 | 261 | 293 | 352 | 290 | 181 | 315 |
| 39 | 291 | 340 | 337 | 329 | 305 | 353 | 349 | 336 | 344 |
| 40 | 272 | 294 | 291 | 293 | 292 | 235 | 326 | 279 | 310 |
| 41 | 487 | 502 | 504 | 510 | 507 | 524 | 525 | 537 | 540 |
| 42 | 392 | 450 | 425 | 446 | 449 | 421 | 471 | 443 | 470 |
| 43 | 296 | 311 | 318 | 305 | 307 | 257 | 339 | 301 | 329 |
| 44 | 342 | 391 | 341 | 394 | 363 | 400 | 438 | 354 | 359 |
| 45 | 217 | 214 | 240 | 229 | 216 | 235 | 231 | 246 | 253 |
| 46 | 131 | 132 | 181 | 134 | 141 | 165 | 182 | 206 | 145 |
| 47 | 290 | 292 | 304 | 301 | 299 | 246 | 338 | 282 | 318 |
| 48 | 293 | 311 | 316 | 305 | 307 | 258 | 337 | 299 | 329 |
| 49 | 223 | 256 | 296 | 226 | 208 | 334 | 342 | 335 | 240 |
| 50 | 497 | 495 | 506 | 512 | 518 | 530 | 534 | 535 | 542 |
| 51 | 368 | 399 | 359 | 414 | 388 | 424 | 463 | 370 | 381 |
| 52 | 237 | 304 | 292 | 262 | 219 | 309 | 264 | 298 | 318 |
| 53 | 464 | 468 | 482 | 484 | 461 | 489 | 492 | 497 | 506 |
| 54 | 453 | 371 | 405 | 434 | 428 | 473 | 423 | 425 | 420 |

|    |     |     |     |     |     |     |     |     |     |
|----|-----|-----|-----|-----|-----|-----|-----|-----|-----|
| 1  |     |     |     |     |     |     |     |     |     |
| 2  | 433 | 459 | 448 | 456 | 462 | 481 | 479 | 452 | 497 |
| 3  | 476 | 493 | 472 | 498 | 496 | 515 | 526 | 507 | 517 |
| 4  | 357 | 374 | 381 | 369 | 388 | 385 | 404 | 381 | 431 |
| 5  | 294 | 308 | 317 | 304 | 302 | 254 | 335 | 300 | 323 |
| 6  | 494 | 499 | 507 | 508 | 514 | 530 | 529 | 527 | 538 |
| 7  | 474 | 485 | 479 | 490 | 504 | 508 | 495 | 519 | 517 |
| 8  |     |     |     |     |     |     |     |     |     |
| 9  |     |     |     |     |     |     |     |     |     |
| 10 |     |     |     |     |     |     |     |     |     |
| 11 |     |     |     |     |     |     |     |     |     |
| 12 |     |     |     |     |     |     |     |     |     |
| 13 |     |     |     |     |     |     |     |     |     |
| 14 |     |     |     |     |     |     |     |     |     |
| 15 |     |     |     |     |     |     |     |     |     |
| 16 |     |     |     |     |     |     |     |     |     |
| 17 |     |     |     |     |     |     |     |     |     |
| 18 |     |     |     |     |     |     |     |     |     |
| 19 |     |     |     |     |     |     |     |     |     |
| 20 |     |     |     |     |     |     |     |     |     |
| 21 |     |     |     |     |     |     |     |     |     |
| 22 |     |     |     |     |     |     |     |     |     |
| 23 |     |     |     |     |     |     |     |     |     |
| 24 |     |     |     |     |     |     |     |     |     |
| 25 |     |     |     |     |     |     |     |     |     |
| 26 |     |     |     |     |     |     |     |     |     |
| 27 |     |     |     |     |     |     |     |     |     |
| 28 |     |     |     |     |     |     |     |     |     |
| 29 |     |     |     |     |     |     |     |     |     |
| 30 |     |     |     |     |     |     |     |     |     |
| 31 |     |     |     |     |     |     |     |     |     |
| 32 |     |     |     |     |     |     |     |     |     |
| 33 |     |     |     |     |     |     |     |     |     |
| 34 |     |     |     |     |     |     |     |     |     |
| 35 |     |     |     |     |     |     |     |     |     |
| 36 |     |     |     |     |     |     |     |     |     |
| 37 |     |     |     |     |     |     |     |     |     |
| 38 |     |     |     |     |     |     |     |     |     |
| 39 |     |     |     |     |     |     |     |     |     |
| 40 |     |     |     |     |     |     |     |     |     |
| 41 |     |     |     |     |     |     |     |     |     |
| 42 |     |     |     |     |     |     |     |     |     |
| 43 |     |     |     |     |     |     |     |     |     |
| 44 |     |     |     |     |     |     |     |     |     |
| 45 |     |     |     |     |     |     |     |     |     |
| 46 |     |     |     |     |     |     |     |     |     |
| 47 |     |     |     |     |     |     |     |     |     |
| 48 |     |     |     |     |     |     |     |     |     |
| 49 |     |     |     |     |     |     |     |     |     |
| 50 |     |     |     |     |     |     |     |     |     |
| 51 |     |     |     |     |     |     |     |     |     |
| 52 |     |     |     |     |     |     |     |     |     |
| 53 |     |     |     |     |     |     |     |     |     |
| 54 |     |     |     |     |     |     |     |     |     |
| 55 |     |     |     |     |     |     |     |     |     |
| 56 |     |     |     |     |     |     |     |     |     |
| 57 |     |     |     |     |     |     |     |     |     |
| 58 |     |     |     |     |     |     |     |     |     |
| 59 |     |     |     |     |     |     |     |     |     |
| 60 |     |     |     |     |     |     |     |     |     |

For peer review only

1  
2  
3  
4  
5  
6  
7  
8  
9  
10  
11  
12  
13  
14  
15  
16  
17  
18  
19  
20  
21  
22  
23  
24  
25  
26  
27  
28  
29  
30  
31  
32  
33  
34  
35  
36  
37  
38  
39  
40  
41  
42  
43  
44  
45  
46  
47  
48  
49  
50  
51  
52  
53  
54  
55  
56  
57  
58  
59  
60

| RA9 | RA2 | RTX | RXC | RXL | RBA | RAJ | RRK | RHU |
|-----|-----|-----|-----|-----|-----|-----|-----|-----|
| 562 | 591 | 595 | 601 | 616 | 628 | 636 | 644 | 661 |
| 440 | 444 | 458 | 442 | 508 | 474 | 493 | 512 | 533 |
| 227 | 301 | 218 | 240 | 285 | 255 | 291 | 373 | 307 |
| 175 | 131 | 79  | 69  | 83  | 139 | 178 | 119 | 240 |
| 324 | 399 | 273 | 294 | 318 | 332 | 299 | 398 | 402 |
| 532 | 560 | 571 | 578 | 594 | 595 | 620 | 613 | 631 |
| 497 | 536 | 524 | 521 | 552 | 555 | 584 | 577 | 590 |
| 563 | 581 | 581 | 589 | 609 | 620 | 623 | 644 | 649 |
| 411 | 451 | 434 | 476 | 456 | 451 | 449 | 475 | 482 |
| 484 | 537 | 521 | 518 | 540 | 543 | 567 | 564 | 580 |
| 263 | 363 | 248 | 276 | 317 | 298 | 333 | 423 | 371 |
| 211 | 170 | 85  | 78  | 107 | 169 | 226 | 150 | 266 |
| 521 | 501 | 520 | 508 | 511 | 539 | 536 | 559 | 593 |
| 539 | 562 | 563 | 579 | 589 | 602 | 613 | 616 | 625 |
| 321 | 454 | 314 | 334 | 370 | 359 | 401 | 504 | 452 |
| 323 | 454 | 315 | 333 | 372 | 361 | 402 | 507 | 451 |
| 553 | 569 | 570 | 583 | 598 | 602 | 615 | 617 | 640 |
| 210 | 189 | 293 | 290 | 301 | 304 | 323 | 215 | 336 |
| 321 | 454 | 314 | 334 | 371 | 361 | 402 | 504 | 452 |
| 496 | 518 | 493 | 534 | 542 | 558 | 556 | 566 | 593 |
| 347 | 408 | 406 | 406 | 402 | 420 | 405 | 439 | 439 |
| 426 | 402 | 465 | 439 | 471 | 449 | 479 | 455 | 466 |
| 328 | 400 | 271 | 294 | 321 | 328 | 299 | 404 | 401 |
| 323 | 454 | 315 | 333 | 372 | 363 | 402 | 506 | 452 |
| 511 | 496 | 523 | 502 | 513 | 529 | 534 | 555 | 591 |
| 432 | 450 | 462 | 473 | 476 | 478 | 472 | 529 | 517 |
| 554 | 568 | 577 | 584 | 580 | 607 | 605 | 629 | 616 |
| 285 | 394 | 250 | 289 | 337 | 308 | 334 | 451 | 399 |
| 234 | 222 | 324 | 327 | 331 | 337 | 355 | 243 | 366 |
| 367 | 355 | 352 | 368 | 400 | 385 | 431 | 403 | 450 |
| 305 | 425 | 289 | 305 | 348 | 327 | 377 | 490 | 422 |
| 557 | 579 | 587 | 597 | 608 | 617 | 631 | 642 | 650 |
| 513 | 498 | 525 | 500 | 500 | 528 | 531 | 553 | 588 |
| 318 | 452 | 315 | 332 | 373 | 359 | 402 | 506 | 450 |
| 415 | 454 | 427 | 465 | 487 | 464 | 468 | 452 | 461 |
| 226 | 255 | 229 | 241 | 263 | 284 | 298 | 301 | 323 |
| 137 | 151 | 147 | 151 | 184 | 140 | 186 | 210 | 200 |
| 314 | 439 | 296 | 321 | 362 | 353 | 387 | 495 | 446 |
| 318 | 452 | 313 | 332 | 370 | 358 | 399 | 504 | 447 |
| 215 | 268 | 306 | 279 | 354 | 243 | 337 | 321 | 293 |
| 564 | 578 | 591 | 599 | 612 | 619 | 626 | 649 | 652 |
| 422 | 465 | 443 | 500 | 514 | 477 | 490 | 472 | 507 |
| 291 | 233 | 321 | 288 | 322 | 283 | 323 | 356 | 335 |
| 534 | 547 | 561 | 552 | 570 | 588 | 592 | 604 | 615 |
| 427 | 527 | 491 | 511 | 459 | 581 | 526 | 538 | 498 |

|    |     |     |     |     |     |     |     |     |     |
|----|-----|-----|-----|-----|-----|-----|-----|-----|-----|
| 1  |     |     |     |     |     |     |     |     |     |
| 2  | 507 | 487 | 539 | 539 | 534 | 551 | 553 | 557 | 575 |
| 3  | 546 | 567 | 559 | 587 | 602 | 597 | 613 | 614 | 637 |
| 4  | 456 | 404 | 436 | 395 | 454 | 438 | 520 | 426 | 519 |
| 5  | 312 | 452 | 312 | 332 | 366 | 359 | 399 | 504 | 448 |
| 6  | 561 | 574 | 588 | 596 | 612 | 614 | 624 | 640 | 643 |
| 7  | 543 | 553 | 579 | 575 | 595 | 589 | 602 | 623 | 625 |
| 8  |     |     |     |     |     |     |     |     |     |
| 9  |     |     |     |     |     |     |     |     |     |
| 10 |     |     |     |     |     |     |     |     |     |
| 11 |     |     |     |     |     |     |     |     |     |
| 12 |     |     |     |     |     |     |     |     |     |
| 13 |     |     |     |     |     |     |     |     |     |
| 14 |     |     |     |     |     |     |     |     |     |
| 15 |     |     |     |     |     |     |     |     |     |
| 16 |     |     |     |     |     |     |     |     |     |
| 17 |     |     |     |     |     |     |     |     |     |
| 18 |     |     |     |     |     |     |     |     |     |
| 19 |     |     |     |     |     |     |     |     |     |
| 20 |     |     |     |     |     |     |     |     |     |
| 21 |     |     |     |     |     |     |     |     |     |
| 22 |     |     |     |     |     |     |     |     |     |
| 23 |     |     |     |     |     |     |     |     |     |
| 24 |     |     |     |     |     |     |     |     |     |
| 25 |     |     |     |     |     |     |     |     |     |
| 26 |     |     |     |     |     |     |     |     |     |
| 27 |     |     |     |     |     |     |     |     |     |
| 28 |     |     |     |     |     |     |     |     |     |
| 29 |     |     |     |     |     |     |     |     |     |
| 30 |     |     |     |     |     |     |     |     |     |
| 31 |     |     |     |     |     |     |     |     |     |
| 32 |     |     |     |     |     |     |     |     |     |
| 33 |     |     |     |     |     |     |     |     |     |
| 34 |     |     |     |     |     |     |     |     |     |
| 35 |     |     |     |     |     |     |     |     |     |
| 36 |     |     |     |     |     |     |     |     |     |
| 37 |     |     |     |     |     |     |     |     |     |
| 38 |     |     |     |     |     |     |     |     |     |
| 39 |     |     |     |     |     |     |     |     |     |
| 40 |     |     |     |     |     |     |     |     |     |
| 41 |     |     |     |     |     |     |     |     |     |
| 42 |     |     |     |     |     |     |     |     |     |
| 43 |     |     |     |     |     |     |     |     |     |
| 44 |     |     |     |     |     |     |     |     |     |
| 45 |     |     |     |     |     |     |     |     |     |
| 46 |     |     |     |     |     |     |     |     |     |
| 47 |     |     |     |     |     |     |     |     |     |
| 48 |     |     |     |     |     |     |     |     |     |
| 49 |     |     |     |     |     |     |     |     |     |
| 50 |     |     |     |     |     |     |     |     |     |
| 51 |     |     |     |     |     |     |     |     |     |
| 52 |     |     |     |     |     |     |     |     |     |
| 53 |     |     |     |     |     |     |     |     |     |
| 54 |     |     |     |     |     |     |     |     |     |
| 55 |     |     |     |     |     |     |     |     |     |
| 56 |     |     |     |     |     |     |     |     |     |
| 57 |     |     |     |     |     |     |     |     |     |
| 58 |     |     |     |     |     |     |     |     |     |
| 59 |     |     |     |     |     |     |     |     |     |
| 60 |     |     |     |     |     |     |     |     |     |

For peer review only



1  
2  
3  
4  
5  
6  
7  
8  
9  
10  
11  
12  
13  
14  
15  
16  
17  
18  
19  
20  
21  
22  
23  
24  
25  
26  
27  
28  
29  
30  
31  
32  
33  
34  
35  
36  
37  
38  
39  
40  
41  
42  
43  
44  
45  
46  
47  
48  
49  
50  
51  
52  
53  
54  
55  
56  
57  
58  
59  
60

| RXR | RJ7 | RR1 | RYR | RXN | RYJ | RX1 | RWD | RL4 |
|-----|-----|-----|-----|-----|-----|-----|-----|-----|
| 668 | 661 | 689 | 702 | 712 | 713 | 729 | 733 | 735 |
| 558 | 520 | 552 | 526 | 571 | 559 | 587 | 591 | 592 |
| 278 | 332 | 348 | 263 | 302 | 397 | 404 | 304 | 336 |
| 101 | 115 | 109 | 91  | 310 | 196 | 240 | 237 | 165 |
| 300 | 378 | 447 | 334 | 414 | 428 | 473 | 346 | 375 |
| 642 | 640 | 665 | 654 | 680 | 696 | 689 | 711 | 705 |
| 601 | 595 | 614 | 611 | 653 | 670 | 666 | 657 | 658 |
| 660 | 657 | 683 | 693 | 711 | 706 | 715 | 729 | 723 |
| 497 | 452 | 508 | 492 | 545 | 510 | 537 | 529 | 544 |
| 582 | 598 | 601 | 599 | 641 | 632 | 646 | 644 | 656 |
| 295 | 367 | 402 | 307 | 343 | 407 | 449 | 347 | 389 |
| 126 | 132 | 130 | 116 | 372 | 228 | 294 | 269 | 199 |
| 585 | 563 | 642 | 595 | 632 | 611 | 666 | 632 | 633 |
| 637 | 635 | 652 | 657 | 685 | 688 | 701 | 696 | 707 |
| 351 | 435 | 482 | 365 | 406 | 495 | 549 | 413 | 448 |
| 348 | 438 | 484 | 363 | 407 | 493 | 548 | 414 | 451 |
| 640 | 643 | 669 | 676 | 692 | 691 | 712 | 700 | 705 |
| 317 | 324 | 347 | 367 | 240 | 382 | 338 | 368 | 373 |
| 351 | 438 | 482 | 364 | 407 | 497 | 550 | 414 | 454 |
| 567 | 588 | 618 | 633 | 632 | 624 | 662 | 655 | 654 |
| 489 | 455 | 462 | 445 | 486 | 506 | 517 | 540 | 489 |
| 517 | 481 | 506 | 523 | 530 | 574 | 526 | 549 | 550 |
| 307 | 375 | 448 | 334 | 419 | 428 | 477 | 348 | 374 |
| 351 | 443 | 484 | 365 | 411 | 497 | 549 | 413 | 454 |
| 582 | 563 | 638 | 603 | 634 | 610 | 669 | 624 | 635 |
| 505 | 501 | 514 | 534 | 571 | 551 | 551 | 555 | 560 |
| 644 | 642 | 659 | 674 | 691 | 686 | 708 | 693 | 695 |
| 311 | 387 | 414 | 310 | 366 | 465 | 481 | 331 | 395 |
| 346 | 347 | 389 | 393 | 282 | 414 | 372 | 407 | 430 |
| 421 | 434 | 440 | 439 | 464 | 515 | 511 | 493 | 478 |
| 328 | 403 | 459 | 345 | 372 | 463 | 511 | 386 | 423 |
| 659 | 651 | 678 | 693 | 714 | 709 | 722 | 725 | 724 |
| 578 | 557 | 631 | 600 | 627 | 608 | 654 | 628 | 629 |
| 350 | 435 | 482 | 363 | 408 | 496 | 546 | 407 | 451 |
| 500 | 501 | 492 | 501 | 532 | 582 | 559 | 495 | 516 |
| 311 | 346 | 296 | 285 | 292 | 409 | 370 | 322 | 348 |
| 266 | 202 | 219 | 163 | 243 | 268 | 213 | 205 | 207 |
| 335 | 416 | 454 | 350 | 386 | 473 | 519 | 404 | 439 |
| 349 | 439 | 480 | 362 | 403 | 494 | 544 | 412 | 448 |
| 473 | 300 | 362 | 282 | 396 | 387 | 334 | 345 | 342 |
| 655 | 661 | 680 | 693 | 707 | 710 | 718 | 719 | 723 |
| 534 | 527 | 506 | 525 | 553 | 614 | 569 | 518 | 541 |
| 365 | 349 | 378 | 298 | 354 | 415 | 394 | 394 | 417 |
| 642 | 619 | 667 | 632 | 691 | 654 | 681 | 701 | 695 |
| 509 | 592 | 592 | 578 | 574 | 625 | 610 | 585 | 553 |

|    |     |     |     |     |     |     |     |     |     |
|----|-----|-----|-----|-----|-----|-----|-----|-----|-----|
| 1  |     |     |     |     |     |     |     |     |     |
| 2  | 579 | 578 | 578 | 622 | 631 | 633 | 622 | 633 | 650 |
| 3  | 644 | 645 | 653 | 672 | 687 | 697 | 706 | 682 | 686 |
| 4  | 475 | 478 | 524 | 530 | 507 | 551 | 586 | 555 | 571 |
| 5  | 350 | 434 | 480 | 363 | 401 | 494 | 543 | 414 | 446 |
| 6  | 653 | 652 | 672 | 688 | 698 | 710 | 716 | 709 | 715 |
| 7  | 625 | 629 | 658 | 672 | 692 | 675 | 679 | 693 | 700 |
| 8  |     |     |     |     |     |     |     |     |     |
| 9  |     |     |     |     |     |     |     |     |     |
| 10 |     |     |     |     |     |     |     |     |     |
| 11 |     |     |     |     |     |     |     |     |     |
| 12 |     |     |     |     |     |     |     |     |     |
| 13 |     |     |     |     |     |     |     |     |     |
| 14 |     |     |     |     |     |     |     |     |     |
| 15 |     |     |     |     |     |     |     |     |     |
| 16 |     |     |     |     |     |     |     |     |     |
| 17 |     |     |     |     |     |     |     |     |     |
| 18 |     |     |     |     |     |     |     |     |     |
| 19 |     |     |     |     |     |     |     |     |     |
| 20 |     |     |     |     |     |     |     |     |     |
| 21 |     |     |     |     |     |     |     |     |     |
| 22 |     |     |     |     |     |     |     |     |     |
| 23 |     |     |     |     |     |     |     |     |     |
| 24 |     |     |     |     |     |     |     |     |     |
| 25 |     |     |     |     |     |     |     |     |     |
| 26 |     |     |     |     |     |     |     |     |     |
| 27 |     |     |     |     |     |     |     |     |     |
| 28 |     |     |     |     |     |     |     |     |     |
| 29 |     |     |     |     |     |     |     |     |     |
| 30 |     |     |     |     |     |     |     |     |     |
| 31 |     |     |     |     |     |     |     |     |     |
| 32 |     |     |     |     |     |     |     |     |     |
| 33 |     |     |     |     |     |     |     |     |     |
| 34 |     |     |     |     |     |     |     |     |     |
| 35 |     |     |     |     |     |     |     |     |     |
| 36 |     |     |     |     |     |     |     |     |     |
| 37 |     |     |     |     |     |     |     |     |     |
| 38 |     |     |     |     |     |     |     |     |     |
| 39 |     |     |     |     |     |     |     |     |     |
| 40 |     |     |     |     |     |     |     |     |     |
| 41 |     |     |     |     |     |     |     |     |     |
| 42 |     |     |     |     |     |     |     |     |     |
| 43 |     |     |     |     |     |     |     |     |     |
| 44 |     |     |     |     |     |     |     |     |     |
| 45 |     |     |     |     |     |     |     |     |     |
| 46 |     |     |     |     |     |     |     |     |     |
| 47 |     |     |     |     |     |     |     |     |     |
| 48 |     |     |     |     |     |     |     |     |     |
| 49 |     |     |     |     |     |     |     |     |     |
| 50 |     |     |     |     |     |     |     |     |     |
| 51 |     |     |     |     |     |     |     |     |     |
| 52 |     |     |     |     |     |     |     |     |     |
| 53 |     |     |     |     |     |     |     |     |     |
| 54 |     |     |     |     |     |     |     |     |     |
| 55 |     |     |     |     |     |     |     |     |     |
| 56 |     |     |     |     |     |     |     |     |     |
| 57 |     |     |     |     |     |     |     |     |     |
| 58 |     |     |     |     |     |     |     |     |     |
| 59 |     |     |     |     |     |     |     |     |     |
| 60 |     |     |     |     |     |     |     |     |     |

For peer review only

1  
2  
3  
4  
5  
6  
7  
8  
9  
10  
11  
12  
13  
14  
15  
16  
17  
18  
19  
20  
21  
22  
23  
24  
25  
26  
27  
28  
29  
30  
31  
32  
33  
34  
35  
36  
37  
38  
39  
40  
41  
42  
43  
44  
45  
46  
47  
48  
49  
50  
51  
52  
53  
54  
55  
56  
57  
58  
59  
60

| RN5 | RDU | RBV | RA7 | REF | RAL | RKB | RTR | RJZ |
|-----|-----|-----|-----|-----|-----|-----|-----|-----|
| 733 | 738 | 751 | 759 | 763 | 765 | 796 | 807 | 809 |
| 621 | 577 | 621 | 628 | 591 | 602 | 649 | 659 | 625 |
| 334 | 288 | 423 | 343 | 305 | 348 | 397 | 400 | 394 |
| 138 | 100 | 198 | 232 | 188 | 163 | 184 | 208 | 145 |
| 410 | 391 | 405 | 410 | 380 | 422 | 419 | 458 | 387 |
| 713 | 697 | 733 | 723 | 716 | 723 | 757 | 780 | 771 |
| 665 | 648 | 698 | 676 | 662 | 684 | 715 | 736 | 741 |
| 733 | 728 | 742 | 749 | 757 | 752 | 776 | 797 | 800 |
| 548 | 537 | 578 | 573 | 572 | 524 | 598 | 656 | 573 |
| 645 | 628 | 661 | 670 | 676 | 655 | 703 | 710 | 711 |
| 396 | 348 | 448 | 403 | 340 | 387 | 429 | 453 | 423 |
| 159 | 119 | 231 | 284 | 224 | 187 | 210 | 244 | 165 |
| 636 | 652 | 632 | 640 | 656 | 677 | 676 | 697 | 663 |
| 710 | 707 | 736 | 725 | 709 | 728 | 759 | 782 | 764 |
| 454 | 432 | 547 | 467 | 419 | 472 | 508 | 536 | 495 |
| 455 | 433 | 547 | 467 | 422 | 469 | 502 | 535 | 497 |
| 722 | 708 | 733 | 735 | 729 | 733 | 765 | 787 | 782 |
| 350 | 289 | 359 | 429 | 309 | 280 | 370 | 423 | 341 |
| 458 | 432 | 549 | 468 | 422 | 470 | 503 | 534 | 491 |
| 644 | 654 | 666 | 631 | 666 | 673 | 699 | 684 | 734 |
| 479 | 495 | 536 | 522 | 542 | 520 | 526 | 595 | 509 |
| 543 | 540 | 579 | 559 | 534 | 557 | 608 | 633 | 595 |
| 410 | 393 | 403 | 413 | 379 | 427 | 429 | 457 | 382 |
| 456 | 433 | 547 | 467 | 423 | 473 | 508 | 536 | 492 |
| 638 | 652 | 631 | 638 | 656 | 675 | 673 | 696 | 667 |
| 578 | 586 | 598 | 588 | 579 | 578 | 615 | 606 | 625 |
| 714 | 713 | 732 | 734 | 729 | 747 | 755 | 772 | 781 |
| 387 | 385 | 474 | 416 | 369 | 419 | 450 | 467 | 430 |
| 393 | 321 | 397 | 472 | 339 | 310 | 414 | 464 | 376 |
| 477 | 454 | 512 | 514 | 477 | 498 | 532 | 531 | 554 |
| 431 | 411 | 514 | 425 | 401 | 439 | 481 | 496 | 462 |
| 720 | 731 | 753 | 747 | 757 | 762 | 782 | 797 | 801 |
| 634 | 641 | 625 | 635 | 650 | 656 | 672 | 673 | 663 |
| 455 | 430 | 546 | 469 | 420 | 472 | 507 | 534 | 486 |
| 546 | 557 | 519 | 595 | 551 | 556 | 624 | 579 | 605 |
| 327 | 341 | 376 | 365 | 363 | 376 | 390 | 357 | 413 |
| 154 | 200 | 269 | 227 | 211 | 238 | 243 | 264 | 233 |
| 447 | 422 | 532 | 439 | 403 | 439 | 477 | 514 | 475 |
| 457 | 430 | 545 | 468 | 420 | 470 | 504 | 529 | 493 |
| 280 | 367 | 480 | 334 | 383 | 379 | 395 | 426 | 412 |
| 727 | 732 | 746 | 751 | 752 | 758 | 785 | 804 | 800 |
| 578 | 585 | 553 | 624 | 588 | 592 | 638 | 601 | 633 |
| 328 | 352 | 421 | 399 | 352 | 380 | 436 | 406 | 413 |
| 673 | 672 | 704 | 696 | 720 | 719 | 731 | 760 | 756 |
| 578 | 667 | 615 | 628 | 620 | 677 | 611 | 660 | 706 |

|    |     |     |     |     |     |     |     |     |     |
|----|-----|-----|-----|-----|-----|-----|-----|-----|-----|
| 1  |     |     |     |     |     |     |     |     |     |
| 2  | 630 | 647 | 678 | 666 | 638 | 652 | 704 | 725 | 702 |
| 3  | 709 | 712 | 714 | 728 | 728 | 738 | 769 | 758 | 778 |
| 4  | 521 | 516 | 543 | 607 | 542 | 558 | 629 | 594 | 603 |
| 5  | 452 | 428 | 540 | 465 | 421 | 469 | 505 | 527 | 488 |
| 6  | 723 | 729 | 752 | 744 | 742 | 752 | 776 | 796 | 794 |
| 7  | 708 | 705 | 728 | 708 | 717 | 718 | 748 | 768 | 765 |
| 8  |     |     |     |     |     |     |     |     |     |
| 9  |     |     |     |     |     |     |     |     |     |
| 10 |     |     |     |     |     |     |     |     |     |
| 11 |     |     |     |     |     |     |     |     |     |
| 12 |     |     |     |     |     |     |     |     |     |
| 13 |     |     |     |     |     |     |     |     |     |
| 14 |     |     |     |     |     |     |     |     |     |
| 15 |     |     |     |     |     |     |     |     |     |
| 16 |     |     |     |     |     |     |     |     |     |
| 17 |     |     |     |     |     |     |     |     |     |
| 18 |     |     |     |     |     |     |     |     |     |
| 19 |     |     |     |     |     |     |     |     |     |
| 20 |     |     |     |     |     |     |     |     |     |
| 21 |     |     |     |     |     |     |     |     |     |
| 22 |     |     |     |     |     |     |     |     |     |
| 23 |     |     |     |     |     |     |     |     |     |
| 24 |     |     |     |     |     |     |     |     |     |
| 25 |     |     |     |     |     |     |     |     |     |
| 26 |     |     |     |     |     |     |     |     |     |
| 27 |     |     |     |     |     |     |     |     |     |
| 28 |     |     |     |     |     |     |     |     |     |
| 29 |     |     |     |     |     |     |     |     |     |
| 30 |     |     |     |     |     |     |     |     |     |
| 31 |     |     |     |     |     |     |     |     |     |
| 32 |     |     |     |     |     |     |     |     |     |
| 33 |     |     |     |     |     |     |     |     |     |
| 34 |     |     |     |     |     |     |     |     |     |
| 35 |     |     |     |     |     |     |     |     |     |
| 36 |     |     |     |     |     |     |     |     |     |
| 37 |     |     |     |     |     |     |     |     |     |
| 38 |     |     |     |     |     |     |     |     |     |
| 39 |     |     |     |     |     |     |     |     |     |
| 40 |     |     |     |     |     |     |     |     |     |
| 41 |     |     |     |     |     |     |     |     |     |
| 42 |     |     |     |     |     |     |     |     |     |
| 43 |     |     |     |     |     |     |     |     |     |
| 44 |     |     |     |     |     |     |     |     |     |
| 45 |     |     |     |     |     |     |     |     |     |
| 46 |     |     |     |     |     |     |     |     |     |
| 47 |     |     |     |     |     |     |     |     |     |
| 48 |     |     |     |     |     |     |     |     |     |
| 49 |     |     |     |     |     |     |     |     |     |
| 50 |     |     |     |     |     |     |     |     |     |
| 51 |     |     |     |     |     |     |     |     |     |
| 52 |     |     |     |     |     |     |     |     |     |
| 53 |     |     |     |     |     |     |     |     |     |
| 54 |     |     |     |     |     |     |     |     |     |
| 55 |     |     |     |     |     |     |     |     |     |
| 56 |     |     |     |     |     |     |     |     |     |
| 57 |     |     |     |     |     |     |     |     |     |
| 58 |     |     |     |     |     |     |     |     |     |
| 59 |     |     |     |     |     |     |     |     |     |
| 60 |     |     |     |     |     |     |     |     |     |

For peer review only

1  
2  
3  
4  
5  
6  
7  
8  
9  
10  
11  
12  
13  
14  
15  
16  
17  
18  
19  
20  
21  
22  
23  
24  
25  
26  
27  
28  
29  
30  
31  
32  
33  
34  
35  
36  
37  
38  
39  
40  
41  
42  
43  
44  
45  
46  
47  
48  
49  
50  
51  
52  
53  
54  
55  
56  
57  
58  
59  
60

| RHM | RTG | R1H | RK9 | RXW | RR8 | RWP | RWF | RJE |
|-----|-----|-----|-----|-----|-----|-----|-----|-----|
| 839 | 852 | 887 | 916 | 928 | 956 | 962 | 962 | 971 |
| 694 | 692 | 708 | 743 | 765 | 778 | 777 | 734 | 849 |
| 462 | 433 | 427 | 412 | 401 | 543 | 385 | 346 | 458 |
| 206 | 224 | 251 | 220 | 225 | 293 | 209 | 277 | 251 |
| 506 | 482 | 454 | 516 | 458 | 644 | 454 | 430 | 532 |
| 796 | 815 | 869 | 869 | 906 | 906 | 921 | 937 | 934 |
| 727 | 763 | 819 | 798 | 848 | 855 | 867 | 876 | 893 |
| 827 | 842 | 880 | 904 | 922 | 936 | 955 | 946 | 963 |
| 631 | 623 | 617 | 684 | 671 | 712 | 743 | 717 | 679 |
| 742 | 754 | 791 | 795 | 827 | 852 | 822 | 839 | 853 |
| 552 | 470 | 470 | 467 | 439 | 616 | 456 | 401 | 530 |
| 248 | 258 | 285 | 253 | 267 | 349 | 253 | 332 | 282 |
| 725 | 722 | 772 | 797 | 816 | 834 | 809 | 832 | 851 |
| 802 | 808 | 860 | 862 | 891 | 924 | 913 | 922 | 936 |
| 636 | 563 | 531 | 570 | 528 | 736 | 549 | 486 | 613 |
| 637 | 564 | 534 | 574 | 528 | 740 | 550 | 485 | 611 |
| 802 | 827 | 855 | 875 | 896 | 928 | 925 | 935 | 943 |
| 353 | 416 | 534 | 440 | 525 | 380 | 496 | 488 | 533 |
| 637 | 561 | 534 | 574 | 528 | 739 | 551 | 487 | 615 |
| 710 | 753 | 786 | 780 | 794 | 831 | 827 | 860 | 845 |
| 549 | 586 | 614 | 647 | 692 | 647 | 727 | 690 | 695 |
| 590 | 647 | 716 | 657 | 731 | 709 | 698 | 724 | 749 |
| 503 | 486 | 457 | 512 | 453 | 648 | 457 | 436 | 522 |
| 638 | 561 | 533 | 575 | 530 | 741 | 551 | 488 | 614 |
| 725 | 728 | 778 | 799 | 807 | 831 | 806 | 831 | 847 |
| 640 | 675 | 679 | 711 | 710 | 737 | 748 | 760 | 779 |
| 790 | 821 | 858 | 885 | 894 | 925 | 938 | 937 | 935 |
| 575 | 489 | 479 | 506 | 469 | 660 | 479 | 413 | 529 |
| 390 | 471 | 569 | 489 | 574 | 434 | 546 | 530 | 587 |
| 555 | 570 | 651 | 591 | 630 | 635 | 597 | 628 | 658 |
| 590 | 542 | 486 | 541 | 506 | 695 | 518 | 471 | 560 |
| 822 | 833 | 877 | 900 | 915 | 945 | 958 | 950 | 957 |
| 720 | 722 | 765 | 794 | 801 | 825 | 804 | 827 | 844 |
| 633 | 562 | 527 | 573 | 529 | 737 | 550 | 487 | 609 |
| 606 | 603 | 677 | 646 | 674 | 739 | 619 | 677 | 751 |
| 383 | 395 | 543 | 387 | 446 | 439 | 447 | 433 | 468 |
| 276 | 273 | 333 | 220 | 277 | 345 | 300 | 226 | 322 |
| 619 | 549 | 510 | 549 | 500 | 721 | 527 | 475 | 586 |
| 635 | 561 | 527 | 567 | 527 | 735 | 546 | 488 | 611 |
| 426 | 465 | 502 | 375 | 453 | 514 | 552 | 414 | 612 |
| 826 | 845 | 876 | 903 | 926 | 950 | 962 | 956 | 966 |
| 647 | 624 | 717 | 693 | 718 | 786 | 660 | 710 | 773 |
| 395 | 425 | 572 | 428 | 490 | 483 | 441 | 460 | 541 |
| 774 | 792 | 836 | 860 | 873 | 895 | 909 | 875 | 894 |
| 640 | 685 | 780 | 722 | 767 | 781 | 801 | 882 | 754 |

|    |     |     |     |     |     |     |     |     |     |
|----|-----|-----|-----|-----|-----|-----|-----|-----|-----|
| 1  |     |     |     |     |     |     |     |     |     |
| 2  | 714 | 773 | 793 | 800 | 841 | 839 | 851 | 883 | 863 |
| 3  | 805 | 827 | 841 | 868 | 877 | 925 | 920 | 926 | 949 |
| 4  | 602 | 641 | 683 | 738 | 706 | 739 | 675 | 708 | 720 |
| 5  | 632 | 562 | 518 | 566 | 526 | 733 | 549 | 484 | 606 |
| 6  | 821 | 843 | 869 | 903 | 905 | 939 | 958 | 948 | 960 |
| 7  | 796 | 806 | 837 | 860 | 894 | 900 | 931 | 922 | 915 |
| 8  |     |     |     |     |     |     |     |     |     |
| 9  |     |     |     |     |     |     |     |     |     |
| 10 |     |     |     |     |     |     |     |     |     |
| 11 |     |     |     |     |     |     |     |     |     |
| 12 |     |     |     |     |     |     |     |     |     |
| 13 |     |     |     |     |     |     |     |     |     |
| 14 |     |     |     |     |     |     |     |     |     |
| 15 |     |     |     |     |     |     |     |     |     |
| 16 |     |     |     |     |     |     |     |     |     |
| 17 |     |     |     |     |     |     |     |     |     |
| 18 |     |     |     |     |     |     |     |     |     |
| 19 |     |     |     |     |     |     |     |     |     |
| 20 |     |     |     |     |     |     |     |     |     |
| 21 |     |     |     |     |     |     |     |     |     |
| 22 |     |     |     |     |     |     |     |     |     |
| 23 |     |     |     |     |     |     |     |     |     |
| 24 |     |     |     |     |     |     |     |     |     |
| 25 |     |     |     |     |     |     |     |     |     |
| 26 |     |     |     |     |     |     |     |     |     |
| 27 |     |     |     |     |     |     |     |     |     |
| 28 |     |     |     |     |     |     |     |     |     |
| 29 |     |     |     |     |     |     |     |     |     |
| 30 |     |     |     |     |     |     |     |     |     |
| 31 |     |     |     |     |     |     |     |     |     |
| 32 |     |     |     |     |     |     |     |     |     |
| 33 |     |     |     |     |     |     |     |     |     |
| 34 |     |     |     |     |     |     |     |     |     |
| 35 |     |     |     |     |     |     |     |     |     |
| 36 |     |     |     |     |     |     |     |     |     |
| 37 |     |     |     |     |     |     |     |     |     |
| 38 |     |     |     |     |     |     |     |     |     |
| 39 |     |     |     |     |     |     |     |     |     |
| 40 |     |     |     |     |     |     |     |     |     |
| 41 |     |     |     |     |     |     |     |     |     |
| 42 |     |     |     |     |     |     |     |     |     |
| 43 |     |     |     |     |     |     |     |     |     |
| 44 |     |     |     |     |     |     |     |     |     |
| 45 |     |     |     |     |     |     |     |     |     |
| 46 |     |     |     |     |     |     |     |     |     |
| 47 |     |     |     |     |     |     |     |     |     |
| 48 |     |     |     |     |     |     |     |     |     |
| 49 |     |     |     |     |     |     |     |     |     |
| 50 |     |     |     |     |     |     |     |     |     |
| 51 |     |     |     |     |     |     |     |     |     |
| 52 |     |     |     |     |     |     |     |     |     |
| 53 |     |     |     |     |     |     |     |     |     |
| 54 |     |     |     |     |     |     |     |     |     |
| 55 |     |     |     |     |     |     |     |     |     |
| 56 |     |     |     |     |     |     |     |     |     |
| 57 |     |     |     |     |     |     |     |     |     |
| 58 |     |     |     |     |     |     |     |     |     |
| 59 |     |     |     |     |     |     |     |     |     |
| 60 |     |     |     |     |     |     |     |     |     |

For peer review only

1  
2  
3  
4  
5  
6  
7  
8  
9  
10  
11  
12  
13  
14  
15  
16  
17  
18  
19  
20  
21  
22  
23  
24  
25  
26  
27  
28  
29  
30  
31  
32  
33  
34  
35  
36  
37  
38  
39  
40  
41  
42  
43  
44  
45  
46  
47  
48  
49  
50  
51  
52  
53  
54  
55  
56  
57  
58  
59  
60

| RGT | RWA  | RJ1  | RRV  | RH8  | RVV  | RM1  | RTD  | RTE  |
|-----|------|------|------|------|------|------|------|------|
| 977 | 1004 | 1034 | 1033 | 1047 | 1053 | 1207 | 1315 | 1320 |
| 795 | 845  | 855  | 805  | 821  | 821  | 955  | 1047 | 1057 |
| 494 | 561  | 468  | 506  | 444  | 412  | 494  | 678  | 515  |
| 254 | 261  | 255  | 200  | 244  | 212  | 298  | 301  | 345  |
| 574 | 584  | 551  | 511  | 583  | 594  | 643  | 804  | 685  |
| 944 | 975  | 1010 | 1013 | 995  | 1001 | 1149 | 1257 | 1269 |
| 893 | 912  | 955  | 965  | 914  | 908  | 1079 | 1183 | 1173 |
| 955 | 997  | 1026 | 1015 | 1029 | 1041 | 1190 | 1297 | 1319 |
| 747 | 745  | 782  | 773  | 817  | 754  | 902  | 956  | 1002 |
| 845 | 892  | 927  | 915  | 919  | 901  | 1019 | 1162 | 1141 |
| 584 | 629  | 529  | 565  | 542  | 483  | 573  | 744  | 616  |
| 312 | 320  | 301  | 234  | 306  | 273  | 354  | 356  | 406  |
| 873 | 888  | 895  | 865  | 878  | 926  | 1063 | 1142 | 1153 |
| 946 | 978  | 1006 | 998  | 1012 | 1003 | 1146 | 1246 | 1261 |
| 678 | 750  | 631  | 659  | 648  | 600  | 707  | 903  | 753  |
| 676 | 751  | 633  | 658  | 645  | 607  | 708  | 901  | 752  |
| 956 | 990  | 1011 | 1007 | 1029 | 996  | 1155 | 1274 | 1283 |
| 486 | 509  | 517  | 526  | 448  | 477  | 576  | 523  | 685  |
| 682 | 750  | 632  | 661  | 648  | 604  | 708  | 907  | 754  |
| 853 | 848  | 913  | 900  | 890  | 922  | 1043 | 1122 | 1100 |
| 676 | 631  | 774  | 704  | 788  | 705  | 857  | 929  | 937  |
| 722 | 758  | 760  | 781  | 754  | 760  | 860  | 963  | 931  |
| 576 | 588  | 550  | 515  | 579  | 596  | 645  | 817  | 689  |
| 680 | 751  | 633  | 663  | 652  | 603  | 711  | 905  | 751  |
| 871 | 884  | 884  | 860  | 874  | 928  | 1060 | 1135 | 1137 |
| 741 | 776  | 788  | 798  | 808  | 798  | 932  | 992  | 1026 |
| 948 | 974  | 1002 | 1003 | 1016 | 994  | 1164 | 1256 | 1279 |
| 595 | 655  | 586  | 594  | 573  | 516  | 616  | 806  | 649  |
| 541 | 561  | 553  | 558  | 498  | 566  | 636  | 578  | 772  |
| 622 | 688  | 749  | 759  | 668  | 637  | 748  | 836  | 871  |
| 645 | 700  | 596  | 610  | 599  | 573  | 662  | 849  | 687  |
| 963 | 1002 | 1029 | 1026 | 1032 | 1043 | 1197 | 1304 | 1313 |
| 863 | 885  | 883  | 858  | 867  | 928  | 1047 | 1129 | 1141 |
| 676 | 751  | 623  | 662  | 646  | 603  | 710  | 901  | 750  |
| 767 | 680  | 785  | 861  | 778  | 659  | 913  | 916  | 865  |
| 455 | 481  | 552  | 590  | 438  | 399  | 480  | 538  | 584  |
| 277 | 281  | 409  | 357  | 288  | 299  | 331  | 492  | 358  |
| 657 | 736  | 610  | 640  | 626  | 584  | 689  | 871  | 725  |
| 678 | 749  | 633  | 657  | 643  | 597  | 704  | 903  | 753  |
| 451 | 468  | 593  | 542  | 510  | 574  | 574  | 781  | 665  |
| 966 | 999  | 1040 | 1036 | 1046 | 1042 | 1201 | 1292 | 1315 |
| 794 | 701  | 817  | 902  | 816  | 716  | 959  | 955  | 896  |
| 436 | 596  | 609  | 612  | 495  | 483  | 627  | 690  | 606  |
| 887 | 941  | 963  | 953  | 955  | 983  | 1133 | 1222 | 1212 |
| 880 | 748  | 930  | 940  | 901  | 893  | 958  | 1149 | 1011 |

|    |     |     |      |      |      |      |      |      |      |
|----|-----|-----|------|------|------|------|------|------|------|
| 1  |     |     |      |      |      |      |      |      |      |
| 2  | 900 | 915 | 902  | 922  | 913  | 918  | 1067 | 1156 | 1149 |
| 3  | 949 | 971 | 1002 | 1013 | 1013 | 987  | 1160 | 1257 | 1242 |
| 4  | 724 | 783 | 817  | 801  | 853  | 724  | 961  | 939  | 1031 |
| 5  | 668 | 742 | 632  | 654  | 643  | 594  | 699  | 896  | 750  |
| 6  | 964 | 997 | 1028 | 1022 | 1030 | 1025 | 1195 | 1288 | 1300 |
| 7  | 935 | 965 | 986  | 968  | 1001 | 1010 | 1150 | 1233 | 1272 |
| 8  |     |     |      |      |      |      |      |      |      |
| 9  |     |     |      |      |      |      |      |      |      |
| 10 |     |     |      |      |      |      |      |      |      |
| 11 |     |     |      |      |      |      |      |      |      |
| 12 |     |     |      |      |      |      |      |      |      |
| 13 |     |     |      |      |      |      |      |      |      |
| 14 |     |     |      |      |      |      |      |      |      |
| 15 |     |     |      |      |      |      |      |      |      |
| 16 |     |     |      |      |      |      |      |      |      |
| 17 |     |     |      |      |      |      |      |      |      |
| 18 |     |     |      |      |      |      |      |      |      |
| 19 |     |     |      |      |      |      |      |      |      |
| 20 |     |     |      |      |      |      |      |      |      |
| 21 |     |     |      |      |      |      |      |      |      |
| 22 |     |     |      |      |      |      |      |      |      |
| 23 |     |     |      |      |      |      |      |      |      |
| 24 |     |     |      |      |      |      |      |      |      |
| 25 |     |     |      |      |      |      |      |      |      |
| 26 |     |     |      |      |      |      |      |      |      |
| 27 |     |     |      |      |      |      |      |      |      |
| 28 |     |     |      |      |      |      |      |      |      |
| 29 |     |     |      |      |      |      |      |      |      |
| 30 |     |     |      |      |      |      |      |      |      |
| 31 |     |     |      |      |      |      |      |      |      |
| 32 |     |     |      |      |      |      |      |      |      |
| 33 |     |     |      |      |      |      |      |      |      |
| 34 |     |     |      |      |      |      |      |      |      |
| 35 |     |     |      |      |      |      |      |      |      |
| 36 |     |     |      |      |      |      |      |      |      |
| 37 |     |     |      |      |      |      |      |      |      |
| 38 |     |     |      |      |      |      |      |      |      |
| 39 |     |     |      |      |      |      |      |      |      |
| 40 |     |     |      |      |      |      |      |      |      |
| 41 |     |     |      |      |      |      |      |      |      |
| 42 |     |     |      |      |      |      |      |      |      |
| 43 |     |     |      |      |      |      |      |      |      |
| 44 |     |     |      |      |      |      |      |      |      |
| 45 |     |     |      |      |      |      |      |      |      |
| 46 |     |     |      |      |      |      |      |      |      |
| 47 |     |     |      |      |      |      |      |      |      |
| 48 |     |     |      |      |      |      |      |      |      |
| 49 |     |     |      |      |      |      |      |      |      |
| 50 |     |     |      |      |      |      |      |      |      |
| 51 |     |     |      |      |      |      |      |      |      |
| 52 |     |     |      |      |      |      |      |      |      |
| 53 |     |     |      |      |      |      |      |      |      |
| 54 |     |     |      |      |      |      |      |      |      |
| 55 |     |     |      |      |      |      |      |      |      |
| 56 |     |     |      |      |      |      |      |      |      |
| 57 |     |     |      |      |      |      |      |      |      |
| 58 |     |     |      |      |      |      |      |      |      |
| 59 |     |     |      |      |      |      |      |      |      |
| 60 |     |     |      |      |      |      |      |      |      |

For peer review only



1  
2  
3  
4  
5  
6  
7  
8  
9  
10  
11  
12  
13  
14  
15  
16  
17  
18  
19  
20  
21  
22  
23  
24  
25  
26  
27  
28  
29  
30  
31  
32  
33  
34  
35  
36  
37  
38  
39  
40  
41  
42  
43  
44  
45  
46  
47  
48  
49  
50  
51  
52  
53  
54  
55  
56  
57  
58  
59  
60

| <b>RWE</b> | <b>RTH</b> | <b>RHQ</b> | <b>RPY</b> |
|------------|------------|------------|------------|
| 1421       | 1428       | 1494       | 1920       |
| 1146       | 1117       | 1258       | 1471       |
| 725        | 617        | 685        | 670        |
| 391        | 424        | 375        | 537        |
| 751        | 817        | 767        | 709        |
| 1358       | 1380       | 1436       | 1893       |
| 1290       | 1283       | 1356       | 1803       |
| 1396       | 1400       | 1471       | 1894       |
| 1047       | 1085       | 1102       | 1485       |
| 1257       | 1272       | 1336       | 1750       |
| 803        | 725        | 779        | 719        |
| 450        | 519        | 441        | 620        |
| 1212       | 1241       | 1222       | 1664       |
| 1356       | 1370       | 1438       | 1870       |
| 952        | 893        | 912        | 892        |
| 948        | 892        | 912        | 894        |
| 1366       | 1382       | 1446       | 1898       |
| 714        | 564        | 706        | 1036       |
| 950        | 893        | 917        | 890        |
| 1269       | 1230       | 1285       | 1639       |
| 1062       | 1033       | 1033       | 1347       |
| 1059       | 1025       | 1125       | 1528       |
| 759        | 815        | 764        | 712        |
| 951        | 897        | 911        | 893        |
| 1210       | 1241       | 1216       | 1665       |
| 1098       | 1126       | 1154       | 1494       |
| 1358       | 1375       | 1442       | 1877       |
| 835        | 779        | 826        | 772        |
| 782        | 624        | 779        | 1119       |
| 944        | 920        | 1058       | 1358       |
| 903        | 831        | 855        | 821        |
| 1399       | 1413       | 1481       | 1911       |
| 1210       | 1238       | 1199       | 1654       |
| 953        | 889        | 909        | 886        |
| 965        | 990        | 1096       | 1561       |
| 680        | 624        | 739        | 1110       |
| 462        | 392        | 543        | 562        |
| 921        | 860        | 889        | 861        |
| 947        | 892        | 904        | 889        |
| 750        | 638        | 879        | 960        |
| 1396       | 1420       | 1478       | 1938       |
| 997        | 1041       | 1123       | 1642       |
| 792        | 629        | 894        | 1031       |
| 1312       | 1295       | 1385       | 1786       |
| 1309       | 1274       | 1180       | 1743       |

|    |      |      |      |      |
|----|------|------|------|------|
| 1  |      |      |      |      |
| 2  | 1259 | 1251 | 1317 | 1788 |
| 3  | 1350 | 1357 | 1422 | 1897 |
| 4  | 1015 | 1091 | 1213 | 1426 |
| 5  | 946  | 888  | 908  | 881  |
| 6  | 1385 | 1412 | 1471 | 1926 |
| 7  | 1338 | 1366 | 1421 | 1857 |
| 8  |      |      |      |      |
| 9  |      |      |      |      |
| 10 |      |      |      |      |
| 11 |      |      |      |      |
| 12 |      |      |      |      |
| 13 |      |      |      |      |
| 14 |      |      |      |      |
| 15 |      |      |      |      |
| 16 |      |      |      |      |
| 17 |      |      |      |      |
| 18 |      |      |      |      |
| 19 |      |      |      |      |
| 20 |      |      |      |      |
| 21 |      |      |      |      |
| 22 |      |      |      |      |
| 23 |      |      |      |      |
| 24 |      |      |      |      |
| 25 |      |      |      |      |
| 26 |      |      |      |      |
| 27 |      |      |      |      |
| 28 |      |      |      |      |
| 29 |      |      |      |      |
| 30 |      |      |      |      |
| 31 |      |      |      |      |
| 32 |      |      |      |      |
| 33 |      |      |      |      |
| 34 |      |      |      |      |
| 35 |      |      |      |      |
| 36 |      |      |      |      |
| 37 |      |      |      |      |
| 38 |      |      |      |      |
| 39 |      |      |      |      |
| 40 |      |      |      |      |
| 41 |      |      |      |      |
| 42 |      |      |      |      |
| 43 |      |      |      |      |
| 44 |      |      |      |      |
| 45 |      |      |      |      |
| 46 |      |      |      |      |
| 47 |      |      |      |      |
| 48 |      |      |      |      |
| 49 |      |      |      |      |
| 50 |      |      |      |      |
| 51 |      |      |      |      |
| 52 |      |      |      |      |
| 53 |      |      |      |      |
| 54 |      |      |      |      |
| 55 |      |      |      |      |
| 56 |      |      |      |      |
| 57 |      |      |      |      |
| 58 |      |      |      |      |
| 59 |      |      |      |      |
| 60 |      |      |      |      |

For peer review only

**Table 2.** Proportions of patients reporting a positive experience by question and for each of the 146 hospitals correspond to the cells in Figure 2.

**Note**

Entries with NA come from hospitals which received less than 21 responses for the corresponding question.

| Questions | Hospitals |      |      |      |      |      |      |
|-----------|-----------|------|------|------|------|------|------|
|           | RQX       | RRJ  | RT3  | RMP  | RPC  | REP  | RAN  |
| Q10       | 0.71      | 0.70 | 0.81 | 0.82 | 0.74 | 0.75 | 0.73 |
| Q49       | 0.50      | 0.41 | 0.64 | 0.65 | 0.67 | 0.60 | 0.57 |
| Q35       | NA        | 0.57 | 0.62 | 0.62 | 0.42 | 0.62 | 0.59 |
| Q45       | NA        | NA   | NA   | 0.77 | NA   | NA   | NA   |
| Q26       | 0.78      | 0.74 | 0.80 | 0.81 | 0.81 | 0.83 | 0.77 |
| Q13       | 0.66      | 0.63 | 0.66 | 0.74 | 0.69 | 0.72 | 0.65 |
| Q15       | 0.48      | 0.59 | 0.66 | 0.62 | 0.57 | 0.52 | 0.41 |
| Q9        | 0.80      | 0.81 | 0.87 | 0.93 | 0.85 | 0.80 | 0.79 |
| Q1        | 0.78      | 0.62 | 0.65 | 0.73 | 0.87 | 0.80 | 0.64 |
| Q12       | 0.72      | 0.83 | 0.80 | 0.89 | 0.80 | 0.91 | 0.86 |
| Q30       | NA        | 0.52 | 0.71 | 0.76 | 0.85 | 0.80 | 0.68 |
| Q44       | NA        | NA   | NA   | 0.86 | NA   | NA   | NA   |
| Q7        | 0.74      | 0.73 | 0.83 | 0.79 | 0.75 | 0.85 | 0.70 |
| Q14       | 0.52      | 0.48 | 0.64 | 0.76 | 0.63 | 0.71 | 0.62 |
| Q34       | 0.90      | 0.96 | 0.90 | 0.93 | 0.88 | 0.97 | 0.94 |
| Q37       | NA        | 0.93 | 0.90 | 0.91 | 0.90 | 0.91 | 0.86 |
| Q16       | 0.72      | 0.73 | 0.76 | 0.84 | 0.77 | 0.77 | 0.74 |
| Q48       | NA        | NA   | NA   | NA   | NA   | NA   | NA   |
| Q31       | 0.71      | 0.71 | 0.81 | 0.81 | 0.76 | 0.80 | 0.70 |
| Q11       | 0.62      | 0.68 | 0.59 | 0.75 | 0.72 | 0.66 | 0.66 |
| Q53       | 0.76      | 0.41 | 0.60 | 0.67 | 0.72 | 0.58 | 0.51 |
| Q41       | 0.70      | NA   | 0.71 | 0.78 | 0.60 | 0.79 | 0.71 |
| Q25       | 0.83      | 0.93 | 0.94 | 0.98 | 0.95 | 0.98 | 0.90 |
| Q29       | NA        | 0.89 | 0.90 | 0.91 | 0.90 | 0.94 | 0.87 |
| Q6        | 0.89      | 0.85 | 0.91 | 0.85 | 0.93 | 0.87 | 0.67 |
| Q55       | 0.17      | 0.36 | 0.37 | 0.49 | 0.26 | 0.35 | 0.28 |
| Q54       | 0.62      | 0.47 | 0.63 | 0.69 | 0.67 | 0.61 | 0.45 |
| Q36       | 0.81      | 0.77 | 0.91 | 0.94 | 0.89 | 0.90 | 0.83 |
| Q47       | NA        | NA   | NA   | 0.86 | NA   | NA   | NA   |
| Q21       | 0.58      | 0.74 | 0.85 | 0.85 | 0.84 | 0.91 | 0.77 |
| Q38       | NA        | 0.85 | 0.85 | 0.90 | 0.90 | 0.95 | 0.84 |
| Q2        | 0.87      | 0.66 | 0.86 | 0.89 | 0.84 | 0.81 | 0.49 |
| Q5        | 1.00      | 0.96 | 0.96 | 0.97 | 0.91 | 0.96 | 0.92 |
| Q28       | NA        | 0.86 | 0.76 | 0.87 | 0.76 | 0.89 | 0.76 |
| Q19       | NA        | NA   | 0.94 | 0.93 | 0.84 | 0.88 | 0.80 |
| Q23       | NA        | NA   | NA   | 0.87 | 0.78 | 0.83 | 0.66 |
| Q51       | NA        | NA   | NA   | 0.63 | NA   | 0.24 | 0.47 |
| Q39       | NA        | 0.82 | 0.95 | 0.96 | 0.91 | 0.97 | 0.91 |
| Q32       | NA        | 0.82 | 0.77 | 0.65 | 0.78 | 0.79 | 0.76 |
| Q50       | NA        | 0.57 | 0.33 | 0.69 | 0.55 | 0.39 | 0.57 |
| Q56       | 0.83      | 0.88 | 0.96 | 0.92 | 0.90 | 0.93 | 0.82 |
| Q18       | NA        | 0.95 | 0.87 | 0.92 | 0.85 | 0.93 | 0.76 |

|    |            |      |      |      |      |      |      |      |
|----|------------|------|------|------|------|------|------|------|
| 1  |            |      |      |      |      |      |      |      |
| 2  | <b>Q22</b> | NA   | NA   | 0.50 | 0.81 | 0.46 | 0.77 | 0.67 |
| 3  | <b>Q8</b>  | 0.77 | 0.77 | 0.79 | 0.81 | 0.74 | 0.72 | 0.74 |
| 4  | <b>Q52</b> | 0.84 | 0.92 | 0.87 | 1.00 | 0.95 | 0.95 | 0.91 |
| 5  | <b>Q42</b> | 0.91 | 1.00 | 0.97 | 0.97 | 0.92 | 1.00 | 0.95 |
| 6  | <b>Q17</b> | 0.72 | 0.89 | 0.94 | 0.97 | 0.82 | 0.96 | 0.87 |
| 7  | <b>Q20</b> | NA   | 0.83 | 0.85 | 0.90 | 0.78 | 0.95 | 0.80 |
| 8  | <b>Q33</b> | 0.38 | 0.71 | 0.67 | 0.65 | 0.67 | 0.79 | 0.55 |
| 9  | <b>Q57</b> | 0.59 | 0.56 | 0.85 | 0.55 | 0.82 | 0.66 | 0.56 |
| 10 | <b>Q58</b> | 0.31 | 0.23 | 0.22 | 0.27 | 0.14 | 0.29 | 0.59 |
| 11 |            |      |      |      |      |      |      |      |
| 12 |            |      |      |      |      |      |      |      |
| 13 |            |      |      |      |      |      |      |      |
| 14 |            |      |      |      |      |      |      |      |
| 15 |            |      |      |      |      |      |      |      |
| 16 |            |      |      |      |      |      |      |      |
| 17 |            |      |      |      |      |      |      |      |
| 18 |            |      |      |      |      |      |      |      |
| 19 |            |      |      |      |      |      |      |      |
| 20 |            |      |      |      |      |      |      |      |
| 21 |            |      |      |      |      |      |      |      |
| 22 |            |      |      |      |      |      |      |      |
| 23 |            |      |      |      |      |      |      |      |
| 24 |            |      |      |      |      |      |      |      |
| 25 |            |      |      |      |      |      |      |      |
| 26 |            |      |      |      |      |      |      |      |
| 27 |            |      |      |      |      |      |      |      |
| 28 |            |      |      |      |      |      |      |      |
| 29 |            |      |      |      |      |      |      |      |
| 30 |            |      |      |      |      |      |      |      |
| 31 |            |      |      |      |      |      |      |      |
| 32 |            |      |      |      |      |      |      |      |
| 33 |            |      |      |      |      |      |      |      |
| 34 |            |      |      |      |      |      |      |      |
| 35 |            |      |      |      |      |      |      |      |
| 36 |            |      |      |      |      |      |      |      |
| 37 |            |      |      |      |      |      |      |      |
| 38 |            |      |      |      |      |      |      |      |
| 39 |            |      |      |      |      |      |      |      |
| 40 |            |      |      |      |      |      |      |      |
| 41 |            |      |      |      |      |      |      |      |
| 42 |            |      |      |      |      |      |      |      |
| 43 |            |      |      |      |      |      |      |      |
| 44 |            |      |      |      |      |      |      |      |
| 45 |            |      |      |      |      |      |      |      |
| 46 |            |      |      |      |      |      |      |      |
| 47 |            |      |      |      |      |      |      |      |
| 48 |            |      |      |      |      |      |      |      |
| 49 |            |      |      |      |      |      |      |      |
| 50 |            |      |      |      |      |      |      |      |
| 51 |            |      |      |      |      |      |      |      |
| 52 |            |      |      |      |      |      |      |      |
| 53 |            |      |      |      |      |      |      |      |
| 54 |            |      |      |      |      |      |      |      |
| 55 |            |      |      |      |      |      |      |      |
| 56 |            |      |      |      |      |      |      |      |
| 57 |            |      |      |      |      |      |      |      |
| 58 |            |      |      |      |      |      |      |      |
| 59 |            |      |      |      |      |      |      |      |
| 60 |            |      |      |      |      |      |      |      |

For peer review only

hospitals included in the analysis (CPES 2016). These

|    | <b>RGM</b> | <b>RBQ</b> | <b>R1F</b> | <b>RKE</b> | <b>RE9</b> | <b>RJ6</b> | <b>RVY</b> | <b>RA4</b> | <b>RJN</b> |
|----|------------|------------|------------|------------|------------|------------|------------|------------|------------|
| 14 | 0.85       | 0.83       | 0.76       | 0.68       | 0.71       | 0.67       | 0.72       | 0.79       | 0.77       |
| 15 | 0.71       | 0.62       | 0.55       | 0.63       | 0.65       | 0.67       | 0.50       | 0.60       | 0.63       |
| 16 | 0.58       | 0.56       | 0.53       | 0.60       | 0.66       | 0.60       | 0.43       | 0.62       | 0.56       |
| 17 | NA         | 0.64       |
| 18 | 0.81       | 0.81       | 0.78       | 0.79       | 0.67       | 0.82       | 0.79       | 0.76       | 0.79       |
| 19 | 0.79       | 0.79       | 0.67       | 0.69       | 0.75       | 0.78       | 0.73       | 0.74       | 0.68       |
| 20 | 0.60       | 0.65       | 0.59       | 0.56       | 0.62       | 0.59       | 0.60       | 0.50       | 0.58       |
| 21 | 0.96       | 0.82       | 0.86       | 0.86       | 0.90       | 0.87       | 0.79       | 0.86       | 0.89       |
| 22 | 0.80       | 0.66       | 0.74       | 0.76       | 0.78       | 0.72       | 0.79       | 0.85       | 0.78       |
| 23 | 0.94       | 0.86       | 0.76       | 0.83       | 0.82       | 0.86       | 0.81       | 0.82       | 0.83       |
| 24 | 0.85       | 0.76       | 0.75       | 0.82       | 0.72       | 0.69       | 0.64       | 0.80       | 0.74       |
| 25 | NA         | NA         | NA         | 0.82       | NA         | 0.91       | NA         | 0.91       | 0.89       |
| 26 | 0.89       | 0.74       | 0.80       | 0.78       | 0.75       | 0.78       | 0.85       | 0.75       | 0.88       |
| 27 | 0.69       | 0.69       | 0.62       | 0.73       | 0.76       | 0.71       | 0.60       | 0.76       | 0.68       |
| 28 | 0.92       | 0.84       | 0.75       | 0.91       | 0.88       | 0.87       | 0.78       | 0.85       | 0.83       |
| 29 | 0.94       | 0.89       | 0.85       | 0.93       | 0.91       | 0.87       | 0.85       | 0.91       | 0.88       |
| 30 | 0.93       | 0.81       | 0.72       | 0.75       | 0.79       | 0.75       | 0.81       | 0.85       | 0.85       |
| 31 | NA         | 0.48       | 0.61       | 0.73       | 0.73       | 0.77       | 0.73       | 0.75       | 0.71       |
| 32 | 0.75       | 0.84       | 0.76       | 0.79       | 0.74       | 0.72       | 0.71       | 0.73       | 0.82       |
| 33 | 0.80       | 0.62       | 0.66       | 0.69       | 0.75       | 0.74       | 0.79       | 0.74       | 0.81       |
| 34 | 0.63       | 0.53       | 0.59       | 0.69       | 0.61       | 0.61       | 0.55       | 0.65       | 0.63       |
| 35 | 0.71       | 0.67       | 0.72       | 0.73       | 0.78       | 0.74       | 0.76       | 0.79       | 0.72       |
| 36 | 1.00       | 1.00       | 0.96       | 0.98       | 0.89       | 0.93       | 0.94       | 0.97       | 0.92       |
| 37 | 0.94       | 0.84       | 0.88       | 0.84       | 0.80       | 0.84       | 0.88       | 0.81       | 0.91       |
| 38 | 0.92       | 0.88       | 0.86       | 0.89       | 0.95       | 0.89       | 0.89       | 0.88       | 0.94       |
| 39 | 0.42       | 0.38       | 0.37       | 0.43       | 0.37       | 0.42       | 0.27       | 0.31       | 0.35       |
| 40 | 0.76       | 0.56       | 0.55       | 0.68       | 0.72       | 0.65       | 0.62       | 0.71       | 0.69       |
| 41 | 0.96       | 0.87       | 0.88       | 0.92       | 0.82       | 0.83       | 0.80       | 0.84       | 0.88       |
| 42 | NA         | NA         | 0.84       | 0.86       | 0.95       | 0.88       | 0.77       | 0.91       | 0.87       |
| 43 | 0.91       | 0.70       | 0.72       | 0.86       | 0.88       | 0.86       | 0.80       | 0.83       | 0.90       |
| 44 | 0.94       | 0.92       | 0.86       | 0.90       | 0.77       | 0.86       | 0.68       | 0.76       | 0.90       |
| 45 | 0.94       | 0.85       | 0.83       | 0.86       | 0.88       | 0.84       | 0.84       | 0.91       | 0.89       |
| 46 | 0.96       | 0.93       | 0.91       | 0.91       | 0.97       | 0.89       | 0.95       | 0.97       | 0.95       |
| 47 | 0.85       | 0.65       | 0.77       | 0.84       | 0.79       | 0.75       | 0.87       | 0.86       | 0.86       |
| 48 | 0.96       | 0.81       | 0.88       | 0.91       | 0.93       | 0.94       | 0.95       | 0.94       | 0.94       |
| 49 | 0.77       | 0.78       | 0.82       | 0.93       | 0.84       | 0.70       | 0.73       | 0.82       | 0.76       |
| 50 | 0.41       | 0.45       | 0.42       | 0.41       | 0.55       | 0.34       | 0.38       | 0.44       | 0.63       |
| 51 | 0.96       | 0.90       | 0.90       | 0.96       | 0.96       | 0.90       | 0.79       | 0.92       | 0.98       |
| 52 | 0.81       | 0.79       | 0.63       | 0.68       | 0.68       | 0.68       | 0.48       | 0.63       | 0.82       |
| 53 | 0.43       | 0.56       | 0.47       | 0.48       | 0.55       | 0.46       | 0.42       | 0.52       | 0.58       |
| 54 | 0.96       | 0.94       | 0.85       | 0.95       | 0.95       | 0.91       | 0.93       | 0.90       | 0.90       |
| 55 | 0.90       | 0.90       | 0.84       | 0.90       | 0.96       | 0.97       | 0.82       | 0.89       | 0.94       |

|    |      |      |      |      |      |      |      |      |      |
|----|------|------|------|------|------|------|------|------|------|
| 1  |      |      |      |      |      |      |      |      |      |
| 2  | 0.62 | 0.52 | 0.50 | 0.83 | 0.64 | 0.46 | 0.39 | 0.70 | 0.55 |
| 3  | 0.87 | 0.79 | 0.74 | 0.79 | 0.90 | 0.81 | 0.70 | 0.83 | 0.78 |
| 4  | 0.95 | 0.94 | 0.93 | 0.93 | 0.99 | 0.95 | 0.97 | 0.97 | 0.97 |
| 5  | 0.98 | 0.96 | 0.94 | 0.96 | 0.97 | 0.97 | 1.00 | 0.98 | 0.97 |
| 6  | 0.91 | 0.90 | 0.90 | 0.97 | 0.96 | 0.88 | 0.84 | 0.88 | 0.94 |
| 7  | 0.92 | 0.74 | 0.81 | 0.96 | 0.86 | 0.88 | 0.82 | 0.86 | 0.87 |
| 8  | 0.83 | 0.70 | 0.55 | 0.72 | 0.77 | 0.49 | 0.71 | 0.69 | 0.71 |
| 9  | 0.78 | 0.68 | 0.77 | 0.68 | 0.82 | 0.70 | 0.70 | 0.84 | 0.72 |
| 10 | 0.78 | 0.68 | 0.77 | 0.68 | 0.82 | 0.70 | 0.70 | 0.84 | 0.72 |
| 11 | 0.51 | 0.34 | 0.07 | 0.38 | 0.24 | 0.28 | 0.11 | 0.25 | 0.24 |
| 12 |      |      |      |      |      |      |      |      |      |
| 13 |      |      |      |      |      |      |      |      |      |
| 14 |      |      |      |      |      |      |      |      |      |
| 15 |      |      |      |      |      |      |      |      |      |
| 16 |      |      |      |      |      |      |      |      |      |
| 17 |      |      |      |      |      |      |      |      |      |
| 18 |      |      |      |      |      |      |      |      |      |
| 19 |      |      |      |      |      |      |      |      |      |
| 20 |      |      |      |      |      |      |      |      |      |
| 21 |      |      |      |      |      |      |      |      |      |
| 22 |      |      |      |      |      |      |      |      |      |
| 23 |      |      |      |      |      |      |      |      |      |
| 24 |      |      |      |      |      |      |      |      |      |
| 25 |      |      |      |      |      |      |      |      |      |
| 26 |      |      |      |      |      |      |      |      |      |
| 27 |      |      |      |      |      |      |      |      |      |
| 28 |      |      |      |      |      |      |      |      |      |
| 29 |      |      |      |      |      |      |      |      |      |
| 30 |      |      |      |      |      |      |      |      |      |
| 31 |      |      |      |      |      |      |      |      |      |
| 32 |      |      |      |      |      |      |      |      |      |
| 33 |      |      |      |      |      |      |      |      |      |
| 34 |      |      |      |      |      |      |      |      |      |
| 35 |      |      |      |      |      |      |      |      |      |
| 36 |      |      |      |      |      |      |      |      |      |
| 37 |      |      |      |      |      |      |      |      |      |
| 38 |      |      |      |      |      |      |      |      |      |
| 39 |      |      |      |      |      |      |      |      |      |
| 40 |      |      |      |      |      |      |      |      |      |
| 41 |      |      |      |      |      |      |      |      |      |
| 42 |      |      |      |      |      |      |      |      |      |
| 43 |      |      |      |      |      |      |      |      |      |
| 44 |      |      |      |      |      |      |      |      |      |
| 45 |      |      |      |      |      |      |      |      |      |
| 46 |      |      |      |      |      |      |      |      |      |
| 47 |      |      |      |      |      |      |      |      |      |
| 48 |      |      |      |      |      |      |      |      |      |
| 49 |      |      |      |      |      |      |      |      |      |
| 50 |      |      |      |      |      |      |      |      |      |
| 51 |      |      |      |      |      |      |      |      |      |
| 52 |      |      |      |      |      |      |      |      |      |
| 53 |      |      |      |      |      |      |      |      |      |
| 54 |      |      |      |      |      |      |      |      |      |
| 55 |      |      |      |      |      |      |      |      |      |
| 56 |      |      |      |      |      |      |      |      |      |
| 57 |      |      |      |      |      |      |      |      |      |
| 58 |      |      |      |      |      |      |      |      |      |
| 59 |      |      |      |      |      |      |      |      |      |
| 60 |      |      |      |      |      |      |      |      |      |

For peer review only

|    | <b>RAS</b> | <b>RFR</b> | <b>RAX</b> | <b>RWW</b> | <b>RM3</b> | <b>RQM</b> | <b>RVR</b> | <b>RJR</b> | <b>RC1</b> |
|----|------------|------------|------------|------------|------------|------------|------------|------------|------------|
| 1  |            |            |            |            |            |            |            |            |            |
| 2  |            |            |            |            |            |            |            |            |            |
| 3  |            |            |            |            |            |            |            |            |            |
| 4  |            |            |            |            |            |            |            |            |            |
| 5  |            |            |            |            |            |            |            |            |            |
| 6  |            |            |            |            |            |            |            |            |            |
| 7  |            |            |            |            |            |            |            |            |            |
| 8  |            |            |            |            |            |            |            |            |            |
| 9  |            |            |            |            |            |            |            |            |            |
| 10 |            |            |            |            |            |            |            |            |            |
| 11 |            |            |            |            |            |            |            |            |            |
| 12 |            |            |            |            |            |            |            |            |            |
| 13 |            |            |            |            |            |            |            |            |            |
| 14 | 0.73       | 0.83       | 0.66       | 0.69       | 0.73       | 0.70       | 0.65       | 0.73       | 0.79       |
| 15 | 0.54       | 0.64       | 0.51       | 0.55       | 0.69       | 0.57       | 0.59       | 0.65       | 0.57       |
| 16 | 0.52       | 0.67       | 0.48       | 0.52       | 0.66       | 0.45       | 0.55       | 0.57       | 0.45       |
| 17 | 0.56       | 0.71       | NA         | 0.50       | 0.55       | 0.63       | NA         | 0.60       | 0.63       |
| 18 | 0.76       | 0.88       | 0.84       | 0.75       | 0.83       | 0.71       | 0.79       | 0.78       | 0.78       |
| 19 | 0.68       | 0.76       | 0.63       | 0.65       | 0.82       | 0.70       | 0.69       | 0.73       | 0.77       |
| 20 | 0.53       | 0.62       | 0.39       | 0.49       | 0.58       | 0.56       | 0.47       | 0.54       | 0.61       |
| 21 | 0.88       | 0.90       | 0.85       | 0.84       | 0.89       | 0.84       | 0.83       | 0.86       | 0.84       |
| 22 | 0.74       | 0.85       | 0.74       | 0.83       | 0.76       | 0.77       | 0.70       | 0.80       | 0.75       |
| 23 | 0.85       | 0.89       | 0.79       | 0.79       | 0.89       | 0.78       | 0.82       | 0.85       | 0.82       |
| 24 | 0.64       | 0.84       | 0.72       | 0.71       | 0.80       | 0.69       | 0.71       | 0.74       | 0.73       |
| 25 | 0.82       | 0.89       | NA         | 0.75       | 0.89       | 0.89       | NA         | 0.83       | 0.83       |
| 26 | 0.74       | 0.79       | 0.77       | 0.74       | 0.86       | 0.78       | 0.76       | 0.88       | 0.81       |
| 27 | 0.71       | 0.74       | 0.57       | 0.59       | 0.74       | 0.60       | 0.68       | 0.70       | 0.67       |
| 28 | 0.86       | 0.90       | 0.87       | 0.81       | 0.87       | 0.84       | 0.89       | 0.90       | 0.83       |
| 29 | 0.86       | 0.90       | 0.88       | 0.89       | 0.88       | 0.76       | 0.86       | 0.93       | 0.86       |
| 30 | 0.77       | 0.81       | 0.80       | 0.69       | 0.86       | 0.71       | 0.79       | 0.86       | 0.79       |
| 31 | 0.70       | 0.56       | 0.63       | 0.50       | 0.88       | 0.73       | 0.77       | 0.75       | 0.67       |
| 32 | 0.65       | 0.84       | 0.76       | 0.79       | 0.68       | 0.64       | 0.66       | 0.75       | 0.72       |
| 33 | 0.79       | 0.80       | 0.72       | 0.66       | 0.76       | 0.67       | 0.74       | 0.81       | 0.73       |
| 34 | 0.61       | 0.71       | 0.60       | 0.60       | 0.57       | 0.56       | 0.64       | 0.62       | 0.55       |
| 35 | 0.69       | 0.79       | 0.71       | 0.70       | 0.82       | 0.68       | 0.77       | 0.68       | 0.68       |
| 36 | 0.96       | 0.99       | 0.97       | 0.94       | 0.95       | 0.90       | 0.91       | 0.99       | 0.95       |
| 37 | 0.83       | 0.92       | 0.83       | 0.87       | 0.89       | 0.87       | 0.87       | 0.89       | 0.82       |
| 38 | 0.87       | 0.91       | 0.92       | 0.79       | 0.90       | 0.88       | 0.83       | 0.90       | 0.86       |
| 39 | 0.39       | 0.50       | 0.30       | 0.38       | 0.45       | 0.38       | 0.38       | 0.44       | 0.30       |
| 40 | 0.57       | 0.71       | 0.61       | 0.58       | 0.64       | 0.60       | 0.65       | 0.62       | 0.60       |
| 41 | 0.83       | 0.91       | 0.81       | 0.81       | 0.91       | 0.81       | 0.87       | 0.80       | 0.76       |
| 42 | 0.92       | 0.90       | 0.70       | 0.68       | 0.96       | 0.83       | 0.90       | 0.93       | 0.89       |
| 43 | 0.80       | 0.89       | 0.76       | 0.73       | 0.89       | 0.80       | 0.87       | 0.90       | 0.73       |
| 44 | 0.79       | 0.91       | 0.86       | 0.83       | 0.90       | 0.82       | 0.93       | 0.88       | 0.78       |
| 45 | 0.79       | 0.88       | 0.87       | 0.76       | 0.87       | 0.81       | 0.88       | 0.85       | 0.82       |
| 46 | 0.90       | 0.97       | 0.91       | 0.89       | 0.94       | 0.90       | 0.96       | 0.97       | 0.96       |
| 47 | 0.75       | 0.84       | 0.87       | 0.81       | 0.84       | 0.80       | 0.84       | 0.86       | 0.74       |
| 48 | 0.90       | 0.95       | 0.93       | 0.90       | 0.93       | 0.88       | 0.92       | 0.90       | 0.84       |
| 49 | 0.75       | 0.89       | 0.74       | 0.76       | 0.84       | 0.80       | 0.86       | 0.87       | 0.72       |
| 50 | 0.47       | 0.57       | 0.36       | 0.35       | 0.61       | 0.49       | 0.51       | 0.48       | 0.33       |
| 51 | 0.88       | 0.99       | 0.95       | 0.91       | 0.94       | 0.89       | 0.95       | 0.99       | 0.86       |
| 52 | 0.61       | 0.74       | 0.70       | 0.67       | 0.66       | 0.73       | 0.70       | 0.66       | 0.60       |
| 53 | 0.56       | 0.64       | 0.54       | 0.49       | 0.63       | 0.48       | 0.61       | 0.62       | 0.50       |
| 54 | 0.91       | 0.91       | 0.87       | 0.86       | 0.93       | 0.90       | 0.92       | 0.87       | 0.88       |
| 55 | 0.94       | 0.92       | 0.90       | 0.88       | 0.82       | 0.88       | 0.91       | 0.89       | 0.84       |

|    |      |      |      |      |      |      |      |      |      |
|----|------|------|------|------|------|------|------|------|------|
| 1  |      |      |      |      |      |      |      |      |      |
| 2  | 0.56 | 0.62 | 0.53 | 0.64 | 0.59 | 0.50 | 0.61 | 0.60 | 0.43 |
| 3  | 0.69 | 0.82 | 0.60 | 0.73 | 0.78 | 0.61 | 0.78 | 0.83 | 0.71 |
| 4  | 0.97 | 0.93 | 0.91 | 0.93 | 0.97 | 0.93 | 0.97 | 0.97 | 0.98 |
| 5  | 0.97 | 0.96 | 0.97 | 0.94 | 0.98 | 0.93 | 0.98 | 0.97 | 0.99 |
| 6  | 0.85 | 0.99 | 0.90 | 0.85 | 0.94 | 0.84 | 0.92 | 0.90 | 0.85 |
| 7  | 0.81 | 0.87 | 0.79 | 0.75 | 0.84 | 0.85 | 0.91 | 0.93 | 0.79 |
| 8  | 0.71 | 0.70 | 0.49 | 0.69 | 0.76 | 0.49 | 0.63 | 0.69 | 0.54 |
| 9  | 0.66 | 0.73 | 0.78 | 0.75 | 0.75 | 0.64 | 0.68 | 0.73 | 0.64 |
| 10 | 0.66 | 0.73 | 0.78 | 0.75 | 0.75 | 0.64 | 0.68 | 0.73 | 0.64 |
| 11 | 0.24 | 0.30 | 0.14 | 0.10 | 0.37 | 0.23 | 0.30 | 0.22 | 0.13 |
| 12 |      |      |      |      |      |      |      |      |      |
| 13 |      |      |      |      |      |      |      |      |      |
| 14 |      |      |      |      |      |      |      |      |      |
| 15 |      |      |      |      |      |      |      |      |      |
| 16 |      |      |      |      |      |      |      |      |      |
| 17 |      |      |      |      |      |      |      |      |      |
| 18 |      |      |      |      |      |      |      |      |      |
| 19 |      |      |      |      |      |      |      |      |      |
| 20 |      |      |      |      |      |      |      |      |      |
| 21 |      |      |      |      |      |      |      |      |      |
| 22 |      |      |      |      |      |      |      |      |      |
| 23 |      |      |      |      |      |      |      |      |      |
| 24 |      |      |      |      |      |      |      |      |      |
| 25 |      |      |      |      |      |      |      |      |      |
| 26 |      |      |      |      |      |      |      |      |      |
| 27 |      |      |      |      |      |      |      |      |      |
| 28 |      |      |      |      |      |      |      |      |      |
| 29 |      |      |      |      |      |      |      |      |      |
| 30 |      |      |      |      |      |      |      |      |      |
| 31 |      |      |      |      |      |      |      |      |      |
| 32 |      |      |      |      |      |      |      |      |      |
| 33 |      |      |      |      |      |      |      |      |      |
| 34 |      |      |      |      |      |      |      |      |      |
| 35 |      |      |      |      |      |      |      |      |      |
| 36 |      |      |      |      |      |      |      |      |      |
| 37 |      |      |      |      |      |      |      |      |      |
| 38 |      |      |      |      |      |      |      |      |      |
| 39 |      |      |      |      |      |      |      |      |      |
| 40 |      |      |      |      |      |      |      |      |      |
| 41 |      |      |      |      |      |      |      |      |      |
| 42 |      |      |      |      |      |      |      |      |      |
| 43 |      |      |      |      |      |      |      |      |      |
| 44 |      |      |      |      |      |      |      |      |      |
| 45 |      |      |      |      |      |      |      |      |      |
| 46 |      |      |      |      |      |      |      |      |      |
| 47 |      |      |      |      |      |      |      |      |      |
| 48 |      |      |      |      |      |      |      |      |      |
| 49 |      |      |      |      |      |      |      |      |      |
| 50 |      |      |      |      |      |      |      |      |      |
| 51 |      |      |      |      |      |      |      |      |      |
| 52 |      |      |      |      |      |      |      |      |      |
| 53 |      |      |      |      |      |      |      |      |      |
| 54 |      |      |      |      |      |      |      |      |      |
| 55 |      |      |      |      |      |      |      |      |      |
| 56 |      |      |      |      |      |      |      |      |      |
| 57 |      |      |      |      |      |      |      |      |      |
| 58 |      |      |      |      |      |      |      |      |      |
| 59 |      |      |      |      |      |      |      |      |      |
| 60 |      |      |      |      |      |      |      |      |      |

For peer review only



1  
2  
3  
4  
5  
6  
7  
8  
9  
10  
11  
12  
13  
14  
15  
16  
17  
18  
19  
20  
21  
22  
23  
24  
25  
26  
27  
28  
29  
30  
31  
32  
33  
34  
35  
36  
37  
38  
39  
40  
41  
42  
43  
44  
45  
46  
47  
48  
49  
50  
51  
52  
53  
54  
55  
56  
57  
58  
59  
60

| RFF  | RJ2  | RA3  | RBT  | REN  | RRF  | RAP  | RMC  | RLQ  |
|------|------|------|------|------|------|------|------|------|
| 0.76 | 0.66 | 0.71 | 0.73 | 0.74 | 0.70 | 0.64 | 0.81 | 0.76 |
| 0.63 | 0.52 | 0.56 | 0.63 | 0.59 | 0.59 | 0.48 | 0.65 | 0.62 |
| 0.54 | 0.56 | 0.40 | 0.51 | 0.62 | 0.54 | 0.45 | 0.69 | 0.47 |
| 0.63 | 0.61 | NA   | 0.68 | 0.58 | 0.72 | 0.51 | 0.64 | 0.60 |
| 0.82 | 0.73 | 0.80 | 0.81 | 0.83 | 0.78 | 0.67 | 0.83 | 0.75 |
| 0.75 | 0.72 | 0.65 | 0.73 | 0.70 | 0.74 | 0.60 | 0.79 | 0.74 |
| 0.58 | 0.53 | 0.48 | 0.59 | 0.63 | 0.57 | 0.48 | 0.69 | 0.59 |
| 0.90 | 0.84 | 0.79 | 0.87 | 0.83 | 0.84 | 0.77 | 0.92 | 0.88 |
| 0.77 | 0.73 | 0.71 | 0.82 | 0.79 | 0.84 | 0.69 | 0.81 | 0.84 |
| 0.84 | 0.81 | 0.75 | 0.82 | 0.88 | 0.80 | 0.73 | 0.93 | 0.86 |
| 0.78 | 0.78 | 0.63 | 0.70 | 0.77 | 0.76 | 0.66 | 0.82 | 0.65 |
| 0.93 | 0.86 | 0.89 | 0.80 | 0.87 | 0.93 | 0.85 | 0.92 | 0.84 |
| 0.81 | 0.76 | 0.74 | 0.78 | 0.81 | 0.79 | 0.64 | 0.84 | 0.84 |
| 0.68 | 0.64 | 0.61 | 0.69 | 0.64 | 0.65 | 0.56 | 0.73 | 0.63 |
| 0.89 | 0.82 | 0.85 | 0.89 | 0.89 | 0.88 | 0.76 | 0.91 | 0.78 |
| 0.93 | 0.81 | 0.89 | 0.87 | 0.93 | 0.89 | 0.75 | 0.91 | 0.80 |
| 0.82 | 0.78 | 0.72 | 0.83 | 0.80 | 0.77 | 0.62 | 0.86 | 0.81 |
| 0.76 | 0.73 | 0.62 | 0.76 | 0.64 | 0.69 | 0.54 | 0.72 | 0.72 |
| 0.86 | 0.72 | 0.77 | 0.77 | 0.78 | 0.84 | 0.55 | 0.81 | 0.70 |
| 0.72 | 0.77 | 0.71 | 0.72 | 0.73 | 0.75 | 0.67 | 0.84 | 0.75 |
| 0.63 | 0.52 | 0.45 | 0.71 | 0.67 | 0.69 | 0.52 | 0.69 | 0.73 |
| 0.79 | 0.71 | 0.67 | 0.71 | 0.69 | 0.70 | 0.56 | 0.81 | 0.69 |
| 1.00 | 0.96 | 0.94 | 0.99 | 0.96 | 0.97 | 0.95 | 0.98 | 0.94 |
| 0.92 | 0.80 | 0.85 | 0.81 | 0.84 | 0.89 | 0.69 | 0.91 | 0.82 |
| 0.92 | 0.87 | 0.85 | 0.91 | 0.88 | 0.93 | 0.85 | 0.92 | 0.89 |
| 0.41 | 0.31 | 0.28 | 0.32 | 0.37 | 0.41 | 0.40 | 0.26 | 0.32 |
| 0.70 | 0.54 | 0.58 | 0.73 | 0.68 | 0.67 | 0.49 | 0.71 | 0.68 |
| 0.88 | 0.86 | 0.86 | 0.85 | 0.80 | 0.85 | 0.69 | 0.88 | 0.83 |
| 0.89 | 0.86 | 0.85 | 0.86 | 0.82 | 0.86 | 0.72 | 0.91 | 0.87 |
| 0.85 | 0.81 | 0.82 | 0.78 | 0.86 | 0.84 | 0.76 | 0.88 | 0.76 |
| 0.91 | 0.84 | 0.84 | 0.87 | 0.84 | 0.82 | 0.77 | 0.91 | 0.84 |
| 0.85 | 0.82 | 0.81 | 0.88 | 0.86 | 0.89 | 0.79 | 0.93 | 0.86 |
| 0.94 | 0.91 | 0.91 | 0.95 | 0.95 | 0.91 | 0.92 | 0.93 | 0.96 |
| 0.90 | 0.75 | 0.79 | 0.82 | 0.83 | 0.85 | 0.65 | 0.83 | 0.76 |
| 0.88 | 0.87 | 0.92 | 0.89 | 0.90 | 0.89 | 0.83 | 0.94 | 0.92 |
| 0.90 | 0.83 | 0.86 | 0.82 | 0.80 | 0.84 | 0.82 | 0.81 | 0.77 |
| 0.54 | 0.44 | 0.34 | 0.45 | 0.51 | 0.52 | 0.25 | 0.57 | 0.65 |
| 0.96 | 0.97 | 0.93 | 0.97 | 0.95 | 0.93 | 0.87 | 0.94 | 0.90 |
| 0.78 | 0.62 | 0.67 | 0.60 | 0.72 | 0.72 | 0.55 | 0.75 | 0.77 |
| 0.61 | 0.46 | 0.43 | 0.63 | 0.60 | 0.55 | 0.49 | 0.59 | 0.67 |
| 0.93 | 0.88 | 0.88 | 0.91 | 0.93 | 0.90 | 0.83 | 0.95 | 0.91 |
| 0.91 | 0.84 | 0.88 | 0.88 | 0.92 | 0.87 | 0.86 | 0.94 | 0.87 |

|    |      |      |      |      |      |      |      |      |      |
|----|------|------|------|------|------|------|------|------|------|
| 1  |      |      |      |      |      |      |      |      |      |
| 2  | 0.62 | 0.62 | 0.69 | 0.54 | 0.61 | 0.51 | 0.56 | 0.63 | 0.55 |
| 3  | 0.74 | 0.72 | 0.75 | 0.75 | 0.77 | 0.87 | 0.71 | 0.88 | 0.74 |
| 4  | 0.95 | 0.92 | 0.98 | 0.93 | 0.95 | 0.97 | 0.90 | 0.97 | 0.95 |
| 5  | 0.96 | 0.95 | 0.97 | 0.96 | 0.96 | 0.95 | 0.92 | 0.98 | 0.97 |
| 6  | 0.89 | 0.95 | 0.90 | 0.93 | 0.88 | 0.91 | 0.91 | 0.92 | 0.89 |
| 7  | 0.88 | 0.84 | 0.83 | 0.83 | 0.91 | 0.86 | 0.84 | 0.91 | 0.84 |
| 8  | 0.65 | 0.63 | 0.74 | 0.78 | 0.65 | 0.80 | 0.39 | 0.75 | 0.70 |
| 9  | 0.81 | 0.69 | 0.71 | 0.75 | 0.76 | 0.86 | 0.50 | 0.81 | 0.74 |
| 10 | 0.81 | 0.69 | 0.71 | 0.75 | 0.76 | 0.86 | 0.50 | 0.81 | 0.74 |
| 11 | 0.18 | 0.18 | 0.27 | 0.15 | 0.20 | 0.17 | 0.26 | 0.16 | 0.28 |
| 12 |      |      |      |      |      |      |      |      |      |
| 13 |      |      |      |      |      |      |      |      |      |
| 14 |      |      |      |      |      |      |      |      |      |
| 15 |      |      |      |      |      |      |      |      |      |
| 16 |      |      |      |      |      |      |      |      |      |
| 17 |      |      |      |      |      |      |      |      |      |
| 18 |      |      |      |      |      |      |      |      |      |
| 19 |      |      |      |      |      |      |      |      |      |
| 20 |      |      |      |      |      |      |      |      |      |
| 21 |      |      |      |      |      |      |      |      |      |
| 22 |      |      |      |      |      |      |      |      |      |
| 23 |      |      |      |      |      |      |      |      |      |
| 24 |      |      |      |      |      |      |      |      |      |
| 25 |      |      |      |      |      |      |      |      |      |
| 26 |      |      |      |      |      |      |      |      |      |
| 27 |      |      |      |      |      |      |      |      |      |
| 28 |      |      |      |      |      |      |      |      |      |
| 29 |      |      |      |      |      |      |      |      |      |
| 30 |      |      |      |      |      |      |      |      |      |
| 31 |      |      |      |      |      |      |      |      |      |
| 32 |      |      |      |      |      |      |      |      |      |
| 33 |      |      |      |      |      |      |      |      |      |
| 34 |      |      |      |      |      |      |      |      |      |
| 35 |      |      |      |      |      |      |      |      |      |
| 36 |      |      |      |      |      |      |      |      |      |
| 37 |      |      |      |      |      |      |      |      |      |
| 38 |      |      |      |      |      |      |      |      |      |
| 39 |      |      |      |      |      |      |      |      |      |
| 40 |      |      |      |      |      |      |      |      |      |
| 41 |      |      |      |      |      |      |      |      |      |
| 42 |      |      |      |      |      |      |      |      |      |
| 43 |      |      |      |      |      |      |      |      |      |
| 44 |      |      |      |      |      |      |      |      |      |
| 45 |      |      |      |      |      |      |      |      |      |
| 46 |      |      |      |      |      |      |      |      |      |
| 47 |      |      |      |      |      |      |      |      |      |
| 48 |      |      |      |      |      |      |      |      |      |
| 49 |      |      |      |      |      |      |      |      |      |
| 50 |      |      |      |      |      |      |      |      |      |
| 51 |      |      |      |      |      |      |      |      |      |
| 52 |      |      |      |      |      |      |      |      |      |
| 53 |      |      |      |      |      |      |      |      |      |
| 54 |      |      |      |      |      |      |      |      |      |
| 55 |      |      |      |      |      |      |      |      |      |
| 56 |      |      |      |      |      |      |      |      |      |
| 57 |      |      |      |      |      |      |      |      |      |
| 58 |      |      |      |      |      |      |      |      |      |
| 59 |      |      |      |      |      |      |      |      |      |
| 60 |      |      |      |      |      |      |      |      |      |

For peer review only

1  
2  
3  
4  
5  
6  
7  
8  
9  
10  
11  
12  
13  
14  
15  
16  
17  
18  
19  
20  
21  
22  
23  
24  
25  
26  
27  
28  
29  
30  
31  
32  
33  
34  
35  
36  
37  
38  
39  
40  
41  
42  
43  
44  
45  
46  
47  
48  
49  
50  
51  
52  
53  
54  
55  
56  
57  
58  
59  
60

|  | <b>RLT</b> | <b>RDZ</b> | <b>RBK</b> | <b>RQQ</b> | <b>RBN</b> | <b>RDD</b> | <b>RFS</b> | <b>RTK</b> | <b>RCF</b> |
|--|------------|------------|------------|------------|------------|------------|------------|------------|------------|
|  | 0.76       | 0.82       | 0.75       | 0.72       | 0.81       | 0.71       | 0.68       | 0.67       | 0.73       |
|  | 0.65       | 0.73       | 0.55       | 0.55       | 0.71       | 0.52       | 0.60       | 0.54       | 0.57       |
|  | 0.55       | 0.58       | 0.50       | 0.49       | 0.66       | 0.55       | 0.49       | 0.43       | 0.53       |
|  | 0.60       | 0.69       | 0.47       | 0.65       | 0.90       | 0.57       | 0.62       | 0.72       | 0.50       |
|  | 0.77       | 0.82       | 0.77       | 0.79       | 0.85       | 0.78       | 0.77       | 0.75       | 0.78       |
|  | 0.76       | 0.76       | 0.68       | 0.67       | 0.76       | 0.69       | 0.72       | 0.66       | 0.71       |
|  | 0.58       | 0.62       | 0.52       | 0.51       | 0.65       | 0.52       | 0.56       | 0.48       | 0.53       |
|  | 0.82       | 0.90       | 0.81       | 0.82       | 0.91       | 0.84       | 0.86       | 0.84       | 0.82       |
|  | 0.72       | 0.87       | 0.77       | 0.73       | 0.88       | 0.79       | 0.84       | 0.80       | 0.79       |
|  | 0.85       | 0.86       | 0.80       | 0.80       | 0.84       | 0.80       | 0.80       | 0.78       | 0.82       |
|  | 0.81       | 0.81       | 0.73       | 0.71       | 0.78       | 0.68       | 0.72       | 0.69       | 0.66       |
|  | 0.81       | 0.83       | 0.75       | 0.68       | 0.96       | 0.85       | 0.96       | 0.90       | 0.90       |
|  | 0.79       | 0.80       | 0.72       | 0.79       | 0.83       | 0.77       | 0.80       | 0.77       | 0.74       |
|  | 0.68       | 0.75       | 0.62       | 0.66       | 0.66       | 0.60       | 0.68       | 0.61       | 0.64       |
|  | 0.85       | 0.88       | 0.82       | 0.86       | 0.92       | 0.84       | 0.87       | 0.89       | 0.90       |
|  | 0.83       | 0.92       | 0.84       | 0.91       | 0.91       | 0.83       | 0.88       | 0.88       | 0.83       |
|  | 0.79       | 0.83       | 0.73       | 0.79       | 0.81       | 0.77       | 0.80       | 0.70       | 0.77       |
|  | 0.81       | 0.70       | 0.65       | 0.69       | 0.63       | 0.62       | 0.72       | 0.69       | 0.64       |
|  | 0.70       | 0.77       | 0.68       | 0.75       | 0.75       | 0.70       | 0.73       | 0.72       | 0.68       |
|  | 0.74       | 0.77       | 0.70       | 0.74       | 0.73       | 0.74       | 0.73       | 0.72       | 0.78       |
|  | 0.54       | 0.62       | 0.56       | 0.62       | 0.67       | 0.55       | 0.71       | 0.59       | 0.70       |
|  | 0.80       | 0.80       | 0.65       | 0.70       | 0.71       | 0.69       | 0.74       | 0.63       | 0.73       |
|  | 0.97       | 0.97       | 0.96       | 0.93       | 0.98       | 0.97       | 0.93       | 0.97       | 0.95       |
|  | 0.84       | 0.92       | 0.81       | 0.86       | 0.93       | 0.79       | 0.84       | 0.82       | 0.85       |
|  | 0.88       | 0.92       | 0.86       | 0.88       | 0.91       | 0.87       | 0.91       | 0.88       | 0.90       |
|  | 0.40       | 0.34       | 0.40       | 0.27       | 0.35       | 0.32       | 0.35       | 0.33       | 0.38       |
|  | 0.65       | 0.74       | 0.58       | 0.66       | 0.68       | 0.58       | 0.68       | 0.64       | 0.61       |
|  | 0.83       | 0.85       | 0.76       | 0.84       | 0.87       | 0.88       | 0.82       | 0.83       | 0.77       |
|  | 0.92       | 0.81       | 0.76       | 0.78       | 0.89       | 0.86       | 0.90       | 0.80       | 0.80       |
|  | 0.84       | 0.83       | 0.82       | 0.76       | 0.87       | 0.80       | 0.84       | 0.77       | 0.81       |
|  | 0.87       | 0.91       | 0.84       | 0.82       | 0.89       | 0.82       | 0.85       | 0.83       | 0.86       |
|  | 0.85       | 0.91       | 0.82       | 0.88       | 0.91       | 0.86       | 0.89       | 0.84       | 0.90       |
|  | 0.94       | 0.94       | 0.94       | 0.93       | 0.93       | 0.93       | 0.93       | 0.96       | 0.96       |
|  | 0.76       | 0.92       | 0.78       | 0.75       | 0.90       | 0.76       | 0.80       | 0.84       | 0.88       |
|  | 0.94       | 0.95       | 0.85       | 0.91       | 0.94       | 0.88       | 0.89       | 0.87       | 0.90       |
|  | 0.91       | 0.86       | 0.82       | 0.78       | 0.86       | 0.81       | 0.79       | 0.82       | 0.79       |
|  | 0.50       | 0.57       | 0.31       | 0.53       | 0.53       | 0.47       | 0.47       | 0.41       | 0.47       |
|  | 0.91       | 0.97       | 0.94       | 0.95       | 0.96       | 0.88       | 0.94       | 0.88       | 0.93       |
|  | 0.63       | 0.76       | 0.66       | 0.68       | 0.78       | 0.64       | 0.65       | 0.67       | 0.55       |
|  | 0.53       | 0.64       | 0.42       | 0.61       | 0.57       | 0.55       | 0.55       | 0.44       | 0.62       |
|  | 0.95       | 0.94       | 0.85       | 0.90       | 0.91       | 0.94       | 0.93       | 0.89       | 0.92       |
|  | 0.93       | 0.92       | 0.84       | 0.93       | 0.92       | 0.86       | 0.91       | 0.88       | 0.92       |

|    |      |      |      |      |      |      |      |      |      |
|----|------|------|------|------|------|------|------|------|------|
| 1  |      |      |      |      |      |      |      |      |      |
| 2  | 0.61 | 0.52 | 0.70 | 0.50 | 0.63 | 0.60 | 0.44 | 0.44 | 0.63 |
| 3  | 0.73 | 0.89 | 0.74 | 0.73 | 0.73 | 0.73 | 0.74 | 0.70 | 0.78 |
| 4  | 0.97 | 0.97 | 0.92 | 0.95 | 0.96 | 0.94 | 0.96 | 0.97 | 0.98 |
| 5  | 0.98 | 0.99 | 0.92 | 0.96 | 0.98 | 0.95 | 0.96 | 0.95 | 0.98 |
| 6  | 0.92 | 0.93 | 0.89 | 0.89 | 0.90 | 0.90 | 0.83 | 0.89 | 0.86 |
| 7  | 0.86 | 0.90 | 0.83 | 0.83 | 0.92 | 0.78 | 0.86 | 0.77 | 0.86 |
| 8  | 0.66 | 0.73 | 0.67 | 0.53 | 0.71 | 0.56 | 0.72 | 0.72 | 0.72 |
| 9  | 0.77 | 0.77 | 0.64 | 0.75 | 0.82 | 0.79 | 0.66 | 0.76 | 0.57 |
| 10 | 0.77 | 0.77 | 0.64 | 0.75 | 0.82 | 0.79 | 0.66 | 0.76 | 0.57 |
| 11 | 0.29 | 0.19 | 0.29 | 0.25 | 0.11 | 0.13 | 0.20 | 0.18 | 0.31 |
| 12 |      |      |      |      |      |      |      |      |      |
| 13 |      |      |      |      |      |      |      |      |      |
| 14 |      |      |      |      |      |      |      |      |      |
| 15 |      |      |      |      |      |      |      |      |      |
| 16 |      |      |      |      |      |      |      |      |      |
| 17 |      |      |      |      |      |      |      |      |      |
| 18 |      |      |      |      |      |      |      |      |      |
| 19 |      |      |      |      |      |      |      |      |      |
| 20 |      |      |      |      |      |      |      |      |      |
| 21 |      |      |      |      |      |      |      |      |      |
| 22 |      |      |      |      |      |      |      |      |      |
| 23 |      |      |      |      |      |      |      |      |      |
| 24 |      |      |      |      |      |      |      |      |      |
| 25 |      |      |      |      |      |      |      |      |      |
| 26 |      |      |      |      |      |      |      |      |      |
| 27 |      |      |      |      |      |      |      |      |      |
| 28 |      |      |      |      |      |      |      |      |      |
| 29 |      |      |      |      |      |      |      |      |      |
| 30 |      |      |      |      |      |      |      |      |      |
| 31 |      |      |      |      |      |      |      |      |      |
| 32 |      |      |      |      |      |      |      |      |      |
| 33 |      |      |      |      |      |      |      |      |      |
| 34 |      |      |      |      |      |      |      |      |      |
| 35 |      |      |      |      |      |      |      |      |      |
| 36 |      |      |      |      |      |      |      |      |      |
| 37 |      |      |      |      |      |      |      |      |      |
| 38 |      |      |      |      |      |      |      |      |      |
| 39 |      |      |      |      |      |      |      |      |      |
| 40 |      |      |      |      |      |      |      |      |      |
| 41 |      |      |      |      |      |      |      |      |      |
| 42 |      |      |      |      |      |      |      |      |      |
| 43 |      |      |      |      |      |      |      |      |      |
| 44 |      |      |      |      |      |      |      |      |      |
| 45 |      |      |      |      |      |      |      |      |      |
| 46 |      |      |      |      |      |      |      |      |      |
| 47 |      |      |      |      |      |      |      |      |      |
| 48 |      |      |      |      |      |      |      |      |      |
| 49 |      |      |      |      |      |      |      |      |      |
| 50 |      |      |      |      |      |      |      |      |      |
| 51 |      |      |      |      |      |      |      |      |      |
| 52 |      |      |      |      |      |      |      |      |      |
| 53 |      |      |      |      |      |      |      |      |      |
| 54 |      |      |      |      |      |      |      |      |      |
| 55 |      |      |      |      |      |      |      |      |      |
| 56 |      |      |      |      |      |      |      |      |      |
| 57 |      |      |      |      |      |      |      |      |      |
| 58 |      |      |      |      |      |      |      |      |      |
| 59 |      |      |      |      |      |      |      |      |      |
| 60 |      |      |      |      |      |      |      |      |      |

For peer review only

1  
2  
3  
4  
5  
6  
7  
8  
9  
10  
11  
12  
13  
14  
15  
16  
17  
18  
19  
20  
21  
22  
23  
24  
25  
26  
27  
28  
29  
30  
31  
32  
33  
34  
35  
36  
37  
38  
39  
40  
41  
42  
43  
44  
45  
46  
47  
48  
49  
50  
51  
52  
53  
54  
55  
56  
57  
58  
59  
60

| <b>RWG</b> | <b>REM</b> | <b>RJF</b> | <b>RQW</b> | <b>RCB</b> | <b>RF4</b> | <b>RK5</b> | <b>RCD</b> | <b>RBZ</b> |
|------------|------------|------------|------------|------------|------------|------------|------------|------------|
| 0.74       | 0.72       | 0.72       | 0.76       | 0.76       | 0.76       | 0.66       | 0.77       | 0.73       |
| 0.59       | 0.57       | 0.58       | 0.54       | 0.60       | 0.50       | 0.55       | 0.62       | 0.57       |
| 0.49       | 0.49       | 0.52       | 0.54       | 0.57       | 0.49       | 0.45       | 0.63       | 0.58       |
| 0.63       | 0.47       | 0.55       | 0.59       | 0.65       | 0.50       | 0.42       | 0.57       | 0.43       |
| 0.79       | 0.77       | 0.79       | 0.80       | 0.82       | 0.76       | 0.72       | 0.81       | 0.78       |
| 0.69       | 0.70       | 0.69       | 0.68       | 0.75       | 0.70       | 0.67       | 0.75       | 0.73       |
| 0.47       | 0.52       | 0.53       | 0.48       | 0.61       | 0.53       | 0.56       | 0.60       | 0.52       |
| 0.83       | 0.84       | 0.86       | 0.84       | 0.89       | 0.86       | 0.79       | 0.89       | 0.85       |
| 0.83       | 0.80       | 0.76       | 0.81       | 0.80       | 0.82       | 0.81       | 0.81       | 0.77       |
| 0.81       | 0.86       | 0.81       | 0.82       | 0.87       | 0.81       | 0.76       | 0.85       | 0.79       |
| 0.66       | 0.76       | 0.62       | 0.68       | 0.77       | 0.74       | 0.75       | 0.84       | 0.73       |
| 0.85       | 0.80       | 0.92       | 0.73       | 0.87       | 0.79       | 0.76       | 0.82       | 0.83       |
| 0.79       | 0.81       | 0.77       | 0.83       | 0.83       | 0.78       | 0.69       | 0.85       | 0.82       |
| 0.62       | 0.62       | 0.62       | 0.60       | 0.76       | 0.67       | 0.63       | 0.76       | 0.68       |
| 0.85       | 0.89       | 0.89       | 0.84       | 0.84       | 0.86       | 0.88       | 0.89       | 0.89       |
| 0.88       | 0.87       | 0.88       | 0.87       | 0.88       | 0.85       | 0.90       | 0.88       | 0.92       |
| 0.77       | 0.77       | 0.77       | 0.79       | 0.81       | 0.73       | 0.71       | 0.85       | 0.80       |
| 0.69       | 0.58       | 0.66       | 0.70       | 0.66       | 0.59       | 0.55       | 0.77       | 0.67       |
| 0.74       | 0.74       | 0.76       | 0.71       | 0.73       | 0.66       | 0.80       | 0.74       | 0.81       |
| 0.74       | 0.64       | 0.72       | 0.73       | 0.79       | 0.74       | 0.69       | 0.87       | 0.78       |
| 0.64       | 0.61       | 0.58       | 0.65       | 0.68       | 0.56       | 0.54       | 0.66       | 0.71       |
| 0.71       | 0.65       | 0.77       | 0.67       | 0.74       | 0.67       | 0.65       | 0.82       | 0.71       |
| 0.98       | 0.94       | 0.98       | 0.96       | 0.97       | 0.96       | 0.94       | 0.99       | 0.96       |
| 0.87       | 0.88       | 0.83       | 0.83       | 0.89       | 0.85       | 0.86       | 0.87       | 0.86       |
| 0.86       | 0.92       | 0.87       | 0.91       | 0.94       | 0.84       | 0.85       | 0.93       | 0.92       |
| 0.31       | 0.33       | 0.28       | 0.31       | 0.40       | 0.36       | 0.28       | 0.43       | 0.27       |
| 0.58       | 0.68       | 0.64       | 0.58       | 0.62       | 0.55       | 0.61       | 0.70       | 0.71       |
| 0.82       | 0.80       | 0.85       | 0.80       | 0.84       | 0.80       | 0.83       | 0.84       | 0.88       |
| 0.82       | 0.84       | 0.86       | 0.84       | 0.86       | 0.82       | 0.83       | 0.90       | 0.84       |
| 0.78       | 0.76       | 0.81       | 0.79       | 0.85       | 0.77       | 0.70       | 0.92       | 0.81       |
| 0.86       | 0.84       | 0.84       | 0.85       | 0.89       | 0.84       | 0.81       | 0.91       | 0.84       |
| 0.84       | 0.86       | 0.85       | 0.85       | 0.87       | 0.81       | 0.90       | 0.90       | 0.87       |
| 0.93       | 0.93       | 0.94       | 0.94       | 0.94       | 0.91       | 0.94       | 0.96       | 0.98       |
| 0.80       | 0.87       | 0.85       | 0.72       | 0.86       | 0.78       | 0.83       | 0.87       | 0.78       |
| 0.93       | 0.88       | 0.90       | 0.88       | 0.92       | 0.84       | 0.85       | 0.92       | 0.91       |
| 0.85       | 0.88       | 0.71       | 0.76       | 0.86       | 0.80       | 0.77       | 0.93       | 0.85       |
| 0.51       | 0.51       | 0.41       | 0.40       | 0.49       | 0.29       | 0.28       | 0.67       | 0.51       |
| 0.92       | 0.94       | 0.94       | 0.90       | 0.98       | 0.93       | 0.94       | 0.96       | 0.95       |
| 0.66       | 0.59       | 0.68       | 0.57       | 0.63       | 0.65       | 0.67       | 0.72       | 0.65       |
| 0.58       | 0.64       | 0.45       | 0.49       | 0.59       | 0.41       | 0.38       | 0.71       | 0.69       |
| 0.87       | 0.91       | 0.92       | 0.90       | 0.92       | 0.91       | 0.87       | 0.98       | 0.95       |
| 0.89       | 0.89       | 0.84       | 0.86       | 0.87       | 0.85       | 0.85       | 0.93       | 0.95       |

|    |      |      |      |      |      |      |      |      |      |
|----|------|------|------|------|------|------|------|------|------|
| 1  |      |      |      |      |      |      |      |      |      |
| 2  | 0.57 | 0.55 | 0.53 | 0.50 | 0.69 | 0.47 | 0.42 | 0.86 | 0.59 |
| 3  | 0.73 | 0.75 | 0.82 | 0.72 | 0.73 | 0.73 | 0.78 | 0.77 | 0.78 |
| 4  | 0.96 | 0.94 | 0.97 | 0.94 | 0.98 | 0.90 | 0.96 | 0.97 | 0.97 |
| 5  | 0.94 | 0.97 | 0.96 | 0.94 | 0.96 | 0.97 | 0.97 | 0.99 | 0.97 |
| 6  | 0.90 | 0.89 | 0.91 | 0.91 | 0.92 | 0.94 | 0.87 | 0.97 | 0.91 |
| 7  | 0.89 | 0.80 | 0.74 | 0.81 | 0.87 | 0.71 | 0.72 | 0.92 | 0.83 |
| 8  | 0.68 | 0.69 | 0.72 | 0.62 | 0.68 | 0.52 | 0.82 | 0.82 | 0.85 |
| 9  | 0.64 | 0.70 | 0.49 | 0.70 | 0.77 | 0.64 | 0.61 | 0.84 | 0.71 |
| 10 | 0.64 | 0.70 | 0.49 | 0.70 | 0.77 | 0.64 | 0.61 | 0.84 | 0.71 |
| 11 | 0.12 | 0.20 | 0.27 | 0.27 | 0.24 | 0.23 | 0.19 | 0.24 | 0.23 |
| 12 |      |      |      |      |      |      |      |      |      |
| 13 |      |      |      |      |      |      |      |      |      |
| 14 |      |      |      |      |      |      |      |      |      |
| 15 |      |      |      |      |      |      |      |      |      |
| 16 |      |      |      |      |      |      |      |      |      |
| 17 |      |      |      |      |      |      |      |      |      |
| 18 |      |      |      |      |      |      |      |      |      |
| 19 |      |      |      |      |      |      |      |      |      |
| 20 |      |      |      |      |      |      |      |      |      |
| 21 |      |      |      |      |      |      |      |      |      |
| 22 |      |      |      |      |      |      |      |      |      |
| 23 |      |      |      |      |      |      |      |      |      |
| 24 |      |      |      |      |      |      |      |      |      |
| 25 |      |      |      |      |      |      |      |      |      |
| 26 |      |      |      |      |      |      |      |      |      |
| 27 |      |      |      |      |      |      |      |      |      |
| 28 |      |      |      |      |      |      |      |      |      |
| 29 |      |      |      |      |      |      |      |      |      |
| 30 |      |      |      |      |      |      |      |      |      |
| 31 |      |      |      |      |      |      |      |      |      |
| 32 |      |      |      |      |      |      |      |      |      |
| 33 |      |      |      |      |      |      |      |      |      |
| 34 |      |      |      |      |      |      |      |      |      |
| 35 |      |      |      |      |      |      |      |      |      |
| 36 |      |      |      |      |      |      |      |      |      |
| 37 |      |      |      |      |      |      |      |      |      |
| 38 |      |      |      |      |      |      |      |      |      |
| 39 |      |      |      |      |      |      |      |      |      |
| 40 |      |      |      |      |      |      |      |      |      |
| 41 |      |      |      |      |      |      |      |      |      |
| 42 |      |      |      |      |      |      |      |      |      |
| 43 |      |      |      |      |      |      |      |      |      |
| 44 |      |      |      |      |      |      |      |      |      |
| 45 |      |      |      |      |      |      |      |      |      |
| 46 |      |      |      |      |      |      |      |      |      |
| 47 |      |      |      |      |      |      |      |      |      |
| 48 |      |      |      |      |      |      |      |      |      |
| 49 |      |      |      |      |      |      |      |      |      |
| 50 |      |      |      |      |      |      |      |      |      |
| 51 |      |      |      |      |      |      |      |      |      |
| 52 |      |      |      |      |      |      |      |      |      |
| 53 |      |      |      |      |      |      |      |      |      |
| 54 |      |      |      |      |      |      |      |      |      |
| 55 |      |      |      |      |      |      |      |      |      |
| 56 |      |      |      |      |      |      |      |      |      |
| 57 |      |      |      |      |      |      |      |      |      |
| 58 |      |      |      |      |      |      |      |      |      |
| 59 |      |      |      |      |      |      |      |      |      |
| 60 |      |      |      |      |      |      |      |      |      |

For peer review only

1  
2  
3  
4  
5  
6  
7  
8  
9  
10  
11  
12  
13  
14  
15  
16  
17  
18  
19  
20  
21  
22  
23  
24  
25  
26  
27  
28  
29  
30  
31  
32  
33  
34  
35  
36  
37  
38  
39  
40  
41  
42  
43  
44  
45  
46  
47  
48  
49  
50  
51  
52  
53  
54  
55  
56  
57  
58  
59  
60

|    | <b>RTP</b> | <b>RWJ</b> | <b>RC9</b> | <b>RGP</b> | <b>RD8</b> | <b>RBD</b> | <b>RNQ</b> | <b>RP5</b> | <b>RVJ</b> |
|----|------------|------------|------------|------------|------------|------------|------------|------------|------------|
| 14 | 0.74       | 0.75       | 0.75       | 0.73       | 0.65       | 0.75       | 0.77       | 0.72       | 0.79       |
| 15 | 0.56       | 0.52       | 0.62       | 0.60       | 0.47       | 0.56       | 0.54       | 0.54       | 0.56       |
| 16 | 0.45       | 0.47       | 0.57       | 0.54       | 0.44       | 0.52       | 0.52       | 0.51       | 0.49       |
| 17 | 0.66       | 0.64       | 0.62       | 0.67       | 0.68       | 0.69       | 0.61       | 0.50       | 0.50       |
| 18 | 0.73       | 0.80       | 0.82       | 0.73       | 0.73       | 0.80       | 0.85       | 0.78       | 0.74       |
| 19 | 0.72       | 0.69       | 0.75       | 0.68       | 0.68       | 0.70       | 0.72       | 0.64       | 0.70       |
| 20 | 0.50       | 0.55       | 0.56       | 0.52       | 0.47       | 0.51       | 0.53       | 0.54       | 0.54       |
| 21 | 0.82       | 0.83       | 0.87       | 0.81       | 0.81       | 0.85       | 0.86       | 0.85       | 0.87       |
| 22 | 0.83       | 0.77       | 0.76       | 0.76       | 0.80       | 0.78       | 0.79       | 0.77       | 0.77       |
| 23 | 0.84       | 0.81       | 0.85       | 0.77       | 0.78       | 0.81       | 0.83       | 0.80       | 0.84       |
| 24 | 0.67       | 0.74       | 0.76       | 0.76       | 0.72       | 0.76       | 0.75       | 0.74       | 0.74       |
| 25 | 0.92       | 0.86       | 0.92       | 0.85       | 0.86       | 0.84       | 0.81       | 0.81       | 0.82       |
| 26 | 0.76       | 0.81       | 0.83       | 0.79       | 0.70       | 0.84       | 0.78       | 0.76       | 0.79       |
| 27 | 0.66       | 0.63       | 0.68       | 0.66       | 0.63       | 0.66       | 0.67       | 0.61       | 0.64       |
| 28 | 0.88       | 0.81       | 0.88       | 0.88       | 0.87       | 0.86       | 0.87       | 0.87       | 0.94       |
| 29 | 0.94       | 0.88       | 0.88       | 0.88       | 0.85       | 0.90       | 0.92       | 0.85       | 0.88       |
| 30 | 0.79       | 0.75       | 0.80       | 0.76       | 0.72       | 0.80       | 0.74       | 0.72       | 0.83       |
| 31 | 0.71       | 0.77       | 0.71       | 0.59       | 0.53       | 0.71       | 0.68       | 0.58       | 0.68       |
| 32 | 0.69       | 0.74       | 0.74       | 0.77       | 0.68       | 0.81       | 0.72       | 0.75       | 0.75       |
| 33 | 0.77       | 0.76       | 0.72       | 0.73       | 0.63       | 0.71       | 0.74       | 0.71       | 0.75       |
| 34 | 0.58       | 0.62       | 0.60       | 0.65       | 0.54       | 0.68       | 0.61       | 0.59       | 0.60       |
| 35 | 0.70       | 0.72       | 0.71       | 0.74       | 0.65       | 0.73       | 0.68       | 0.71       | 0.73       |
| 36 | 0.96       | 0.96       | 0.96       | 0.96       | 0.90       | 0.97       | 0.97       | 0.97       | 0.96       |
| 37 | 0.85       | 0.83       | 0.86       | 0.83       | 0.84       | 0.84       | 0.86       | 0.81       | 0.86       |
| 38 | 0.87       | 0.92       | 0.87       | 0.86       | 0.87       | 0.91       | 0.84       | 0.87       | 0.84       |
| 39 | 0.30       | 0.31       | 0.45       | 0.34       | 0.31       | 0.31       | 0.30       | 0.32       | 0.40       |
| 40 | 0.60       | 0.60       | 0.62       | 0.65       | 0.55       | 0.62       | 0.56       | 0.53       | 0.65       |
| 41 | 0.81       | 0.84       | 0.83       | 0.86       | 0.83       | 0.85       | 0.87       | 0.85       | 0.83       |
| 42 | 0.88       | 0.86       | 0.92       | 0.81       | 0.81       | 0.85       | 0.88       | 0.74       | 0.82       |
| 43 | 0.79       | 0.77       | 0.85       | 0.77       | 0.80       | 0.81       | 0.77       | 0.79       | 0.87       |
| 44 | 0.89       | 0.87       | 0.86       | 0.80       | 0.82       | 0.83       | 0.86       | 0.84       | 0.91       |
| 45 | 0.83       | 0.87       | 0.84       | 0.83       | 0.83       | 0.84       | 0.82       | 0.83       | 0.83       |
| 46 | 0.95       | 0.96       | 0.96       | 0.93       | 0.92       | 0.98       | 0.94       | 0.92       | 0.92       |
| 47 | 0.86       | 0.80       | 0.78       | 0.75       | 0.77       | 0.82       | 0.78       | 0.83       | 0.87       |
| 48 | 0.84       | 0.89       | 0.86       | 0.91       | 0.86       | 0.92       | 0.84       | 0.83       | 0.90       |
| 49 | 0.88       | 0.82       | 0.86       | 0.82       | 0.69       | 0.77       | 0.80       | 0.77       | 0.73       |
| 50 | 0.35       | 0.51       | 0.52       | 0.45       | 0.30       | 0.48       | 0.42       | 0.35       | 0.40       |
| 51 | 0.94       | 0.93       | 0.93       | 0.94       | 0.91       | 0.98       | 0.91       | 0.92       | 0.92       |
| 52 | 0.70       | 0.64       | 0.66       | 0.58       | 0.53       | 0.67       | 0.62       | 0.57       | 0.68       |
| 53 | 0.49       | 0.55       | 0.70       | 0.53       | 0.39       | 0.62       | 0.47       | 0.54       | 0.57       |
| 54 | 0.86       | 0.90       | 0.92       | 0.93       | 0.87       | 0.89       | 0.83       | 0.83       | 0.85       |
| 55 | 0.82       | 0.84       | 0.87       | 0.93       | 0.81       | 0.91       | 0.80       | 0.81       | 0.83       |

|    |      |      |      |      |      |      |      |      |      |
|----|------|------|------|------|------|------|------|------|------|
| 1  |      |      |      |      |      |      |      |      |      |
| 2  | 0.48 | 0.38 | 0.69 | 0.62 | 0.47 | 0.62 | 0.40 | 0.47 | 0.54 |
| 3  | 0.87 | 0.66 | 0.78 | 0.71 | 0.73 | 0.76 | 0.73 | 0.76 | 0.72 |
| 4  | 0.97 | 0.95 | 0.96 | 0.94 | 0.95 | 0.93 | 0.93 | 0.92 | 0.96 |
| 5  | 0.96 | 0.95 | 0.93 | 0.95 | 0.96 | 0.97 | 0.90 | 0.94 | 0.94 |
| 6  | 0.91 | 0.92 | 0.97 | 0.88 | 0.83 | 0.91 | 0.89 | 0.89 | 0.94 |
| 7  | 0.90 | 0.79 | 0.86 | 0.85 | 0.77 | 0.89 | 0.72 | 0.86 | 0.90 |
| 8  | 0.59 | 0.65 | 0.59 | 0.67 | 0.66 | 0.73 | 0.74 | 0.78 | 0.71 |
| 9  | 0.69 | 0.74 | 0.63 | 0.77 | 0.69 | 0.77 | 0.61 | 0.69 | 0.76 |
| 10 | 0.69 | 0.74 | 0.63 | 0.77 | 0.69 | 0.77 | 0.61 | 0.69 | 0.76 |
| 11 | 0.22 | 0.16 | 0.22 | 0.12 | 0.30 | 0.22 | 0.17 | 0.19 | 0.27 |
| 12 |      |      |      |      |      |      |      |      |      |
| 13 |      |      |      |      |      |      |      |      |      |
| 14 |      |      |      |      |      |      |      |      |      |
| 15 |      |      |      |      |      |      |      |      |      |
| 16 |      |      |      |      |      |      |      |      |      |
| 17 |      |      |      |      |      |      |      |      |      |
| 18 |      |      |      |      |      |      |      |      |      |
| 19 |      |      |      |      |      |      |      |      |      |
| 20 |      |      |      |      |      |      |      |      |      |
| 21 |      |      |      |      |      |      |      |      |      |
| 22 |      |      |      |      |      |      |      |      |      |
| 23 |      |      |      |      |      |      |      |      |      |
| 24 |      |      |      |      |      |      |      |      |      |
| 25 |      |      |      |      |      |      |      |      |      |
| 26 |      |      |      |      |      |      |      |      |      |
| 27 |      |      |      |      |      |      |      |      |      |
| 28 |      |      |      |      |      |      |      |      |      |
| 29 |      |      |      |      |      |      |      |      |      |
| 30 |      |      |      |      |      |      |      |      |      |
| 31 |      |      |      |      |      |      |      |      |      |
| 32 |      |      |      |      |      |      |      |      |      |
| 33 |      |      |      |      |      |      |      |      |      |
| 34 |      |      |      |      |      |      |      |      |      |
| 35 |      |      |      |      |      |      |      |      |      |
| 36 |      |      |      |      |      |      |      |      |      |
| 37 |      |      |      |      |      |      |      |      |      |
| 38 |      |      |      |      |      |      |      |      |      |
| 39 |      |      |      |      |      |      |      |      |      |
| 40 |      |      |      |      |      |      |      |      |      |
| 41 |      |      |      |      |      |      |      |      |      |
| 42 |      |      |      |      |      |      |      |      |      |
| 43 |      |      |      |      |      |      |      |      |      |
| 44 |      |      |      |      |      |      |      |      |      |
| 45 |      |      |      |      |      |      |      |      |      |
| 46 |      |      |      |      |      |      |      |      |      |
| 47 |      |      |      |      |      |      |      |      |      |
| 48 |      |      |      |      |      |      |      |      |      |
| 49 |      |      |      |      |      |      |      |      |      |
| 50 |      |      |      |      |      |      |      |      |      |
| 51 |      |      |      |      |      |      |      |      |      |
| 52 |      |      |      |      |      |      |      |      |      |
| 53 |      |      |      |      |      |      |      |      |      |
| 54 |      |      |      |      |      |      |      |      |      |
| 55 |      |      |      |      |      |      |      |      |      |
| 56 |      |      |      |      |      |      |      |      |      |
| 57 |      |      |      |      |      |      |      |      |      |
| 58 |      |      |      |      |      |      |      |      |      |
| 59 |      |      |      |      |      |      |      |      |      |
| 60 |      |      |      |      |      |      |      |      |      |

For peer review only



1  
2  
3  
4  
5  
6  
7  
8  
9  
10  
11  
12  
13  
14  
15  
16  
17  
18  
19  
20  
21  
22  
23  
24  
25  
26  
27  
28  
29  
30  
31  
32  
33  
34  
35  
36  
37  
38  
39  
40  
41  
42  
43  
44  
45  
46  
47  
48  
49  
50  
51  
52  
53  
54  
55  
56  
57  
58  
59  
60

| <b>RW3</b> | <b>RJC</b> | <b>RAE</b> | <b>RBL</b> | <b>RGR</b> | <b>RQ6</b> | <b>R1K</b> | <b>RN7</b> | <b>RHW</b> |
|------------|------------|------------|------------|------------|------------|------------|------------|------------|
| 0.68       | 0.78       | 0.70       | 0.75       | 0.74       | 0.71       | 0.73       | 0.76       | 0.75       |
| 0.60       | 0.59       | 0.54       | 0.60       | 0.57       | 0.63       | 0.58       | 0.62       | 0.58       |
| 0.51       | 0.56       | 0.39       | 0.56       | 0.55       | 0.58       | 0.51       | 0.47       | 0.46       |
| 0.74       | 0.54       | 0.57       | 0.44       | 0.57       | 0.67       | 0.68       | 0.67       | 0.49       |
| 0.75       | 0.84       | 0.75       | 0.80       | 0.84       | 0.86       | 0.75       | 0.80       | 0.81       |
| 0.74       | 0.77       | 0.69       | 0.74       | 0.72       | 0.76       | 0.68       | 0.80       | 0.78       |
| 0.59       | 0.54       | 0.49       | 0.57       | 0.53       | 0.59       | 0.54       | 0.60       | 0.56       |
| 0.86       | 0.85       | 0.82       | 0.84       | 0.83       | 0.86       | 0.86       | 0.86       | 0.81       |
| 0.68       | 0.80       | 0.78       | 0.80       | 0.83       | 0.70       | 0.70       | 0.76       | 0.82       |
| 0.84       | 0.84       | 0.82       | 0.83       | 0.86       | 0.86       | 0.78       | 0.87       | 0.82       |
| 0.77       | 0.82       | 0.65       | 0.74       | 0.75       | 0.78       | 0.71       | 0.75       | 0.71       |
| 0.88       | 0.83       | 0.89       | 0.84       | 0.86       | 0.85       | 0.86       | 0.92       | 0.84       |
| 0.81       | 0.83       | 0.74       | 0.83       | 0.81       | 0.85       | 0.76       | 0.81       | 0.75       |
| 0.67       | 0.67       | 0.60       | 0.66       | 0.65       | 0.69       | 0.64       | 0.75       | 0.64       |
| 0.87       | 0.87       | 0.78       | 0.86       | 0.87       | 0.88       | 0.86       | 0.80       | 0.88       |
| 0.84       | 0.93       | 0.83       | 0.90       | 0.92       | 0.89       | 0.88       | 0.89       | 0.92       |
| 0.81       | 0.81       | 0.71       | 0.77       | 0.80       | 0.80       | 0.70       | 0.85       | 0.78       |
| 0.76       | 0.71       | 0.61       | 0.59       | 0.68       | 0.73       | 0.64       | 0.75       | 0.61       |
| 0.68       | 0.78       | 0.69       | 0.77       | 0.79       | 0.79       | 0.76       | 0.71       | 0.74       |
| 0.73       | 0.76       | 0.69       | 0.74       | 0.76       | 0.72       | 0.72       | 0.80       | 0.75       |
| 0.59       | 0.76       | 0.54       | 0.62       | 0.70       | 0.63       | 0.59       | 0.63       | 0.64       |
| 0.71       | 0.74       | 0.59       | 0.68       | 0.68       | 0.72       | 0.69       | 0.75       | 0.66       |
| 0.98       | 0.96       | 0.94       | 0.97       | 0.94       | 0.97       | 0.94       | 0.96       | 0.97       |
| 0.82       | 0.86       | 0.78       | 0.88       | 0.90       | 0.92       | 0.85       | 0.86       | 0.81       |
| 0.88       | 0.89       | 0.89       | 0.86       | 0.85       | 0.87       | 0.85       | 0.87       | 0.86       |
| 0.36       | 0.37       | 0.33       | 0.31       | 0.35       | 0.36       | 0.39       | 0.40       | 0.29       |
| 0.58       | 0.66       | 0.57       | 0.66       | 0.70       | 0.68       | 0.60       | 0.67       | 0.54       |
| 0.84       | 0.93       | 0.78       | 0.82       | 0.90       | 0.90       | 0.84       | 0.85       | 0.89       |
| 0.89       | 0.88       | 0.81       | 0.80       | 0.84       | 0.86       | 0.79       | 0.90       | 0.86       |
| 0.82       | 0.88       | 0.76       | 0.84       | 0.81       | 0.85       | 0.81       | 0.87       | 0.82       |
| 0.80       | 0.83       | 0.81       | 0.87       | 0.90       | 0.91       | 0.80       | 0.88       | 0.90       |
| 0.84       | 0.85       | 0.85       | 0.85       | 0.85       | 0.83       | 0.80       | 0.81       | 0.82       |
| 0.94       | 0.97       | 0.92       | 0.94       | 0.94       | 0.95       | 0.90       | 0.95       | 0.89       |
| 0.76       | 0.85       | 0.75       | 0.86       | 0.87       | 0.85       | 0.75       | 0.83       | 0.84       |
| 0.90       | 0.94       | 0.83       | 0.90       | 0.90       | 0.90       | 0.86       | 0.89       | 0.88       |
| 0.82       | 0.86       | 0.80       | 0.72       | 0.77       | 0.81       | 0.81       | 0.89       | 0.78       |
| 0.52       | 0.51       | 0.45       | 0.52       | 0.36       | 0.52       | 0.45       | 0.48       | 0.45       |
| 0.91       | 0.92       | 0.93       | 0.93       | 0.94       | 0.96       | 0.93       | 0.95       | 0.96       |
| 0.60       | 0.70       | 0.59       | 0.73       | 0.73       | 0.76       | 0.70       | 0.65       | 0.71       |
| 0.53       | 0.62       | 0.50       | 0.58       | 0.41       | 0.62       | 0.53       | 0.62       | 0.58       |
| 0.89       | 0.94       | 0.86       | 0.90       | 0.92       | 0.95       | 0.87       | 0.92       | 0.85       |
| 0.87       | 0.96       | 0.86       | 0.89       | 0.87       | 0.88       | 0.86       | 0.88       | 0.84       |

|    |      |      |      |      |      |      |      |      |      |
|----|------|------|------|------|------|------|------|------|------|
| 1  |      |      |      |      |      |      |      |      |      |
| 2  | 0.65 | 0.72 | 0.52 | 0.48 | 0.55 | 0.52 | 0.52 | 0.60 | 0.49 |
| 3  | 0.77 | 0.71 | 0.81 | 0.85 | 0.68 | 0.72 | 0.71 | 0.77 | 0.76 |
| 4  | 0.94 | 0.96 | 0.94 | 0.95 | 0.96 | 0.98 | 0.96 | 0.95 | 0.94 |
| 5  | 0.96 | 0.97 | 0.94 | 0.95 | 0.98 | 0.97 | 0.96 | 0.92 | 0.95 |
| 6  | 0.93 | 0.88 | 0.83 | 0.90 | 0.86 | 0.91 | 0.89 | 0.91 | 0.95 |
| 7  | 0.82 | 0.91 | 0.81 | 0.85 | 0.81 | 0.85 | 0.79 | 0.85 | 0.82 |
| 8  | 0.69 | 0.76 | 0.68 | 0.71 | 0.67 | 0.74 | 0.53 | 0.62 | 0.63 |
| 9  | 0.70 | 0.88 | 0.63 | 0.77 | 0.64 | 0.72 | 0.62 | 0.75 | 0.67 |
| 10 | 0.70 | 0.88 | 0.63 | 0.77 | 0.64 | 0.72 | 0.62 | 0.75 | 0.67 |
| 11 | 0.32 | 0.24 | 0.27 | 0.21 | 0.26 | 0.37 | 0.26 | 0.25 | 0.16 |
| 12 |      |      |      |      |      |      |      |      |      |
| 13 |      |      |      |      |      |      |      |      |      |
| 14 |      |      |      |      |      |      |      |      |      |
| 15 |      |      |      |      |      |      |      |      |      |
| 16 |      |      |      |      |      |      |      |      |      |
| 17 |      |      |      |      |      |      |      |      |      |
| 18 |      |      |      |      |      |      |      |      |      |
| 19 |      |      |      |      |      |      |      |      |      |
| 20 |      |      |      |      |      |      |      |      |      |
| 21 |      |      |      |      |      |      |      |      |      |
| 22 |      |      |      |      |      |      |      |      |      |
| 23 |      |      |      |      |      |      |      |      |      |
| 24 |      |      |      |      |      |      |      |      |      |
| 25 |      |      |      |      |      |      |      |      |      |
| 26 |      |      |      |      |      |      |      |      |      |
| 27 |      |      |      |      |      |      |      |      |      |
| 28 |      |      |      |      |      |      |      |      |      |
| 29 |      |      |      |      |      |      |      |      |      |
| 30 |      |      |      |      |      |      |      |      |      |
| 31 |      |      |      |      |      |      |      |      |      |
| 32 |      |      |      |      |      |      |      |      |      |
| 33 |      |      |      |      |      |      |      |      |      |
| 34 |      |      |      |      |      |      |      |      |      |
| 35 |      |      |      |      |      |      |      |      |      |
| 36 |      |      |      |      |      |      |      |      |      |
| 37 |      |      |      |      |      |      |      |      |      |
| 38 |      |      |      |      |      |      |      |      |      |
| 39 |      |      |      |      |      |      |      |      |      |
| 40 |      |      |      |      |      |      |      |      |      |
| 41 |      |      |      |      |      |      |      |      |      |
| 42 |      |      |      |      |      |      |      |      |      |
| 43 |      |      |      |      |      |      |      |      |      |
| 44 |      |      |      |      |      |      |      |      |      |
| 45 |      |      |      |      |      |      |      |      |      |
| 46 |      |      |      |      |      |      |      |      |      |
| 47 |      |      |      |      |      |      |      |      |      |
| 48 |      |      |      |      |      |      |      |      |      |
| 49 |      |      |      |      |      |      |      |      |      |
| 50 |      |      |      |      |      |      |      |      |      |
| 51 |      |      |      |      |      |      |      |      |      |
| 52 |      |      |      |      |      |      |      |      |      |
| 53 |      |      |      |      |      |      |      |      |      |
| 54 |      |      |      |      |      |      |      |      |      |
| 55 |      |      |      |      |      |      |      |      |      |
| 56 |      |      |      |      |      |      |      |      |      |
| 57 |      |      |      |      |      |      |      |      |      |
| 58 |      |      |      |      |      |      |      |      |      |
| 59 |      |      |      |      |      |      |      |      |      |
| 60 |      |      |      |      |      |      |      |      |      |

For peer review only

1  
2  
3  
4  
5  
6  
7  
8  
9  
10  
11  
12  
13  
14  
15  
16  
17  
18  
19  
20  
21  
22  
23  
24  
25  
26  
27  
28  
29  
30  
31  
32  
33  
34  
35  
36  
37  
38  
39  
40  
41  
42  
43  
44  
45  
46  
47  
48  
49  
50  
51  
52  
53  
54  
55  
56  
57  
58  
59  
60

|  | <b>RNL</b> | <b>RCX</b> | <b>RPA</b> | <b>RWH</b> | <b>RM2</b> | <b>RR7</b> | <b>RNS</b> | <b>RN3</b> | <b>RGN</b> |
|--|------------|------------|------------|------------|------------|------------|------------|------------|------------|
|  | 0.72       | 0.77       | 0.73       | 0.72       | 0.80       | 0.75       | 0.70       | 0.75       | 0.77       |
|  | 0.53       | 0.59       | 0.52       | 0.55       | 0.60       | 0.60       | 0.60       | 0.56       | 0.58       |
|  | 0.53       | 0.50       | 0.44       | 0.50       | 0.54       | 0.65       | 0.52       | 0.47       | 0.59       |
|  | 0.54       | 0.76       | 0.66       | 0.47       | 0.62       | 0.62       | 0.52       | 0.49       | 0.66       |
|  | 0.74       | 0.83       | 0.75       | 0.77       | 0.86       | 0.84       | 0.74       | 0.80       | 0.83       |
|  | 0.69       | 0.73       | 0.74       | 0.70       | 0.77       | 0.81       | 0.77       | 0.75       | 0.76       |
|  | 0.52       | 0.58       | 0.57       | 0.52       | 0.63       | 0.61       | 0.50       | 0.51       | 0.61       |
|  | 0.85       | 0.89       | 0.83       | 0.81       | 0.86       | 0.89       | 0.83       | 0.86       | 0.86       |
|  | 0.81       | 0.77       | 0.76       | 0.75       | 0.81       | 0.85       | 0.74       | 0.79       | 0.80       |
|  | 0.75       | 0.83       | 0.82       | 0.80       | 0.88       | 0.89       | 0.84       | 0.82       | 0.84       |
|  | 0.72       | 0.78       | 0.71       | 0.73       | 0.77       | 0.79       | 0.67       | 0.68       | 0.73       |
|  | 0.79       | 0.87       | 0.84       | 0.82       | 0.85       | 0.90       | 0.81       | 0.82       | 0.88       |
|  | 0.76       | 0.80       | 0.79       | 0.75       | 0.84       | 0.85       | 0.77       | 0.81       | 0.81       |
|  | 0.60       | 0.68       | 0.62       | 0.63       | 0.69       | 0.79       | 0.69       | 0.66       | 0.69       |
|  | 0.84       | 0.82       | 0.83       | 0.84       | 0.85       | 0.90       | 0.83       | 0.87       | 0.92       |
|  | 0.89       | 0.85       | 0.80       | 0.89       | 0.88       | 0.93       | 0.86       | 0.88       | 0.90       |
|  | 0.74       | 0.81       | 0.75       | 0.75       | 0.81       | 0.84       | 0.79       | 0.80       | 0.81       |
|  | 0.61       | 0.70       | 0.69       | 0.58       | 0.67       | 0.74       | 0.66       | 0.61       | 0.68       |
|  | 0.83       | 0.73       | 0.69       | 0.74       | 0.71       | 0.84       | 0.72       | 0.70       | 0.80       |
|  | 0.69       | 0.77       | 0.77       | 0.69       | 0.72       | 0.75       | 0.77       | 0.80       | 0.78       |
|  | 0.67       | 0.71       | 0.57       | 0.61       | 0.61       | 0.60       | 0.60       | 0.64       | 0.67       |
|  | 0.67       | 0.73       | 0.66       | 0.65       | 0.73       | 0.80       | 0.73       | 0.69       | 0.69       |
|  | 0.94       | 0.94       | 0.97       | 0.96       | 0.98       | 0.98       | 0.92       | 0.97       | 0.97       |
|  | 0.80       | 0.83       | 0.81       | 0.87       | 0.90       | 0.90       | 0.83       | 0.84       | 0.84       |
|  | 0.86       | 0.89       | 0.85       | 0.83       | 0.90       | 0.93       | 0.84       | 0.86       | 0.89       |
|  | 0.34       | 0.35       | 0.27       | 0.28       | 0.32       | 0.46       | 0.29       | 0.31       | 0.44       |
|  | 0.55       | 0.68       | 0.58       | 0.55       | 0.63       | 0.69       | 0.58       | 0.59       | 0.66       |
|  | 0.89       | 0.83       | 0.83       | 0.80       | 0.87       | 0.88       | 0.85       | 0.79       | 0.83       |
|  | 0.76       | 0.85       | 0.84       | 0.81       | 0.86       | 0.89       | 0.85       | 0.84       | 0.84       |
|  | 0.76       | 0.83       | 0.80       | 0.82       | 0.80       | 0.87       | 0.81       | 0.80       | 0.83       |
|  | 0.83       | 0.86       | 0.84       | 0.79       | 0.85       | 0.91       | 0.79       | 0.85       | 0.90       |
|  | 0.85       | 0.85       | 0.82       | 0.81       | 0.89       | 0.92       | 0.82       | 0.80       | 0.85       |
|  | 0.94       | 0.94       | 0.91       | 0.91       | 0.95       | 0.98       | 0.92       | 0.94       | 0.96       |
|  | 0.88       | 0.82       | 0.78       | 0.80       | 0.85       | 0.86       | 0.76       | 0.84       | 0.80       |
|  | 0.87       | 0.90       | 0.86       | 0.87       | 0.88       | 0.92       | 0.89       | 0.90       | 0.92       |
|  | 0.79       | 0.85       | 0.88       | 0.84       | 0.72       | 0.84       | 0.85       | 0.75       | 0.93       |
|  | 0.41       | 0.42       | 0.43       | 0.44       | 0.45       | 0.56       | 0.45       | 0.36       | 0.52       |
|  | 0.93       | 0.93       | 0.92       | 0.91       | 0.93       | 0.97       | 0.94       | 0.95       | 0.96       |
|  | 0.65       | 0.68       | 0.61       | 0.69       | 0.62       | 0.79       | 0.65       | 0.51       | 0.69       |
|  | 0.48       | 0.49       | 0.53       | 0.47       | 0.47       | 0.64       | 0.57       | 0.47       | 0.57       |
|  | 0.79       | 0.88       | 0.90       | 0.86       | 0.89       | 0.93       | 0.87       | 0.88       | 0.92       |
|  | 0.84       | 0.90       | 0.86       | 0.84       | 0.89       | 0.92       | 0.86       | 0.82       | 0.87       |

|    |      |      |      |      |      |      |      |      |      |
|----|------|------|------|------|------|------|------|------|------|
| 1  |      |      |      |      |      |      |      |      |      |
| 2  | 0.50 | 0.56 | 0.65 | 0.59 | 0.56 | 0.64 | 0.66 | 0.63 | 0.67 |
| 3  | 0.76 | 0.76 | 0.69 | 0.69 | 0.76 | 0.83 | 0.80 | 0.76 | 0.75 |
| 4  | 0.96 | 0.93 | 0.96 | 0.96 | 0.93 | 0.97 | 0.94 | 0.97 | 0.98 |
| 5  | 0.91 | 0.96 | 0.96 | 0.94 | 0.97 | 0.96 | 0.93 | 0.96 | 0.96 |
| 6  | 0.85 | 0.87 | 0.90 | 0.87 | 0.92 | 0.95 | 0.93 | 0.90 | 0.91 |
| 7  | 0.77 | 0.84 | 0.82 | 0.88 | 0.86 | 0.84 | 0.81 | 0.88 | 0.88 |
| 8  | 0.79 | 0.73 | 0.51 | 0.59 | 0.62 | 0.71 | 0.68 | 0.73 | 0.74 |
| 9  | 0.70 | 0.73 | 0.65 | 0.49 | 0.67 | 0.78 | 0.68 | 0.60 | 0.67 |
| 10 | 0.70 | 0.73 | 0.65 | 0.49 | 0.67 | 0.78 | 0.68 | 0.60 | 0.67 |
| 11 | 0.16 | 0.26 | 0.22 | 0.23 | 0.34 | 0.19 | 0.23 | 0.34 | 0.23 |
| 12 |      |      |      |      |      |      |      |      |      |
| 13 |      |      |      |      |      |      |      |      |      |
| 14 |      |      |      |      |      |      |      |      |      |
| 15 |      |      |      |      |      |      |      |      |      |
| 16 |      |      |      |      |      |      |      |      |      |
| 17 |      |      |      |      |      |      |      |      |      |
| 18 |      |      |      |      |      |      |      |      |      |
| 19 |      |      |      |      |      |      |      |      |      |
| 20 |      |      |      |      |      |      |      |      |      |
| 21 |      |      |      |      |      |      |      |      |      |
| 22 |      |      |      |      |      |      |      |      |      |
| 23 |      |      |      |      |      |      |      |      |      |
| 24 |      |      |      |      |      |      |      |      |      |
| 25 |      |      |      |      |      |      |      |      |      |
| 26 |      |      |      |      |      |      |      |      |      |
| 27 |      |      |      |      |      |      |      |      |      |
| 28 |      |      |      |      |      |      |      |      |      |
| 29 |      |      |      |      |      |      |      |      |      |
| 30 |      |      |      |      |      |      |      |      |      |
| 31 |      |      |      |      |      |      |      |      |      |
| 32 |      |      |      |      |      |      |      |      |      |
| 33 |      |      |      |      |      |      |      |      |      |
| 34 |      |      |      |      |      |      |      |      |      |
| 35 |      |      |      |      |      |      |      |      |      |
| 36 |      |      |      |      |      |      |      |      |      |
| 37 |      |      |      |      |      |      |      |      |      |
| 38 |      |      |      |      |      |      |      |      |      |
| 39 |      |      |      |      |      |      |      |      |      |
| 40 |      |      |      |      |      |      |      |      |      |
| 41 |      |      |      |      |      |      |      |      |      |
| 42 |      |      |      |      |      |      |      |      |      |
| 43 |      |      |      |      |      |      |      |      |      |
| 44 |      |      |      |      |      |      |      |      |      |
| 45 |      |      |      |      |      |      |      |      |      |
| 46 |      |      |      |      |      |      |      |      |      |
| 47 |      |      |      |      |      |      |      |      |      |
| 48 |      |      |      |      |      |      |      |      |      |
| 49 |      |      |      |      |      |      |      |      |      |
| 50 |      |      |      |      |      |      |      |      |      |
| 51 |      |      |      |      |      |      |      |      |      |
| 52 |      |      |      |      |      |      |      |      |      |
| 53 |      |      |      |      |      |      |      |      |      |
| 54 |      |      |      |      |      |      |      |      |      |
| 55 |      |      |      |      |      |      |      |      |      |
| 56 |      |      |      |      |      |      |      |      |      |
| 57 |      |      |      |      |      |      |      |      |      |
| 58 |      |      |      |      |      |      |      |      |      |
| 59 |      |      |      |      |      |      |      |      |      |
| 60 |      |      |      |      |      |      |      |      |      |

For peer review only

1  
2  
3  
4  
5  
6  
7  
8  
9  
10  
11  
12  
13  
14  
15  
16  
17  
18  
19  
20  
21  
22  
23  
24  
25  
26  
27  
28  
29  
30  
31  
32  
33  
34  
35  
36  
37  
38  
39  
40  
41  
42  
43  
44  
45  
46  
47  
48  
49  
50  
51  
52  
53  
54  
55  
56  
57  
58  
59  
60

|  | <b>RVW</b> | <b>RNZ</b> | <b>RDE</b> | <b>RLN</b> | <b>RWY</b> | <b>RGQ</b> | <b>RXP</b> | <b>RXH</b> | <b>RXK</b> |
|--|------------|------------|------------|------------|------------|------------|------------|------------|------------|
|  | 0.77       | 0.76       | 0.76       | 0.73       | 0.74       | 0.69       | 0.73       | 0.77       | 0.75       |
|  | 0.65       | 0.63       | 0.62       | 0.61       | 0.57       | 0.62       | 0.59       | 0.60       | 0.57       |
|  | 0.55       | 0.58       | 0.53       | 0.58       | 0.49       | 0.55       | 0.55       | 0.55       | 0.47       |
|  | 0.72       | 0.61       | 0.69       | 0.59       | 0.59       | 0.65       | 0.64       | 0.69       | 0.59       |
|  | 0.82       | 0.82       | 0.80       | 0.80       | 0.75       | 0.78       | 0.78       | 0.79       | 0.75       |
|  | 0.80       | 0.72       | 0.78       | 0.76       | 0.75       | 0.69       | 0.71       | 0.71       | 0.74       |
|  | 0.63       | 0.54       | 0.62       | 0.58       | 0.51       | 0.52       | 0.54       | 0.53       | 0.55       |
|  | 0.88       | 0.83       | 0.86       | 0.85       | 0.84       | 0.82       | 0.82       | 0.85       | 0.90       |
|  | 0.77       | 0.79       | 0.79       | 0.72       | 0.79       | 0.78       | 0.79       | 0.80       | 0.75       |
|  | 0.88       | 0.86       | 0.83       | 0.83       | 0.83       | 0.83       | 0.81       | 0.82       | 0.85       |
|  | 0.80       | 0.80       | 0.72       | 0.76       | 0.72       | 0.77       | 0.71       | 0.73       | 0.67       |
|  | 0.91       | 0.87       | 0.91       | 0.82       | 0.90       | 0.91       | 0.77       | 0.93       | 0.90       |
|  | 0.83       | 0.84       | 0.80       | 0.78       | 0.78       | 0.83       | 0.80       | 0.80       | 0.80       |
|  | 0.74       | 0.68       | 0.72       | 0.74       | 0.66       | 0.67       | 0.65       | 0.63       | 0.66       |
|  | 0.87       | 0.87       | 0.89       | 0.83       | 0.84       | 0.88       | 0.85       | 0.86       | 0.86       |
|  | 0.87       | 0.89       | 0.89       | 0.89       | 0.89       | 0.90       | 0.87       | 0.88       | 0.84       |
|  | 0.85       | 0.81       | 0.81       | 0.78       | 0.77       | 0.78       | 0.74       | 0.78       | 0.77       |
|  | 0.73       | 0.76       | 0.70       | 0.77       | 0.68       | 0.69       | 0.69       | 0.74       | 0.71       |
|  | 0.76       | 0.78       | 0.72       | 0.77       | 0.75       | 0.74       | 0.72       | 0.75       | 0.70       |
|  | 0.76       | 0.74       | 0.80       | 0.71       | 0.75       | 0.70       | 0.71       | 0.73       | 0.79       |
|  | 0.59       | 0.67       | 0.57       | 0.63       | 0.64       | 0.65       | 0.65       | 0.67       | 0.55       |
|  | 0.80       | 0.78       | 0.76       | 0.75       | 0.73       | 0.78       | 0.74       | 0.69       | 0.70       |
|  | 0.97       | 0.97       | 0.96       | 0.94       | 0.96       | 0.97       | 0.95       | 0.97       | 0.96       |
|  | 0.84       | 0.89       | 0.81       | 0.88       | 0.82       | 0.86       | 0.77       | 0.86       | 0.81       |
|  | 0.91       | 0.93       | 0.87       | 0.90       | 0.89       | 0.87       | 0.88       | 0.82       | 0.88       |
|  | 0.37       | 0.36       | 0.37       | 0.39       | 0.38       | 0.36       | 0.33       | 0.35       | 0.39       |
|  | 0.71       | 0.65       | 0.64       | 0.68       | 0.64       | 0.64       | 0.61       | 0.63       | 0.58       |
|  | 0.84       | 0.81       | 0.82       | 0.81       | 0.87       | 0.85       | 0.85       | 0.85       | 0.76       |
|  | 0.90       | 0.88       | 0.86       | 0.85       | 0.83       | 0.80       | 0.84       | 0.89       | 0.86       |
|  | 0.87       | 0.80       | 0.83       | 0.79       | 0.77       | 0.85       | 0.78       | 0.79       | 0.84       |
|  | 0.85       | 0.89       | 0.90       | 0.86       | 0.86       | 0.87       | 0.85       | 0.86       | 0.83       |
|  | 0.88       | 0.87       | 0.82       | 0.85       | 0.84       | 0.84       | 0.84       | 0.81       | 0.84       |
|  | 0.95       | 0.96       | 0.94       | 0.93       | 0.95       | 0.96       | 0.94       | 0.93       | 0.94       |
|  | 0.86       | 0.88       | 0.83       | 0.79       | 0.87       | 0.89       | 0.77       | 0.80       | 0.77       |
|  | 0.92       | 0.92       | 0.92       | 0.89       | 0.85       | 0.91       | 0.88       | 0.89       | 0.87       |
|  | 0.82       | 0.86       | 0.81       | 0.79       | 0.84       | 0.85       | 0.79       | 0.82       | 0.86       |
|  | 0.50       | 0.50       | 0.49       | 0.53       | 0.51       | 0.56       | 0.49       | 0.53       | 0.39       |
|  | 0.93       | 0.97       | 0.95       | 0.92       | 0.96       | 0.95       | 0.94       | 0.94       | 0.93       |
|  | 0.67       | 0.70       | 0.64       | 0.70       | 0.66       | 0.65       | 0.57       | 0.74       | 0.66       |
|  | 0.59       | 0.57       | 0.49       | 0.56       | 0.56       | 0.58       | 0.58       | 0.49       | 0.49       |
|  | 0.93       | 0.92       | 0.90       | 0.92       | 0.93       | 0.90       | 0.90       | 0.88       | 0.91       |
|  | 0.94       | 0.88       | 0.88       | 0.89       | 0.85       | 0.82       | 0.90       | 0.82       | 0.88       |

|    |      |      |      |      |      |      |      |      |      |
|----|------|------|------|------|------|------|------|------|------|
| 1  |      |      |      |      |      |      |      |      |      |
| 2  | 0.63 | 0.63 | 0.57 | 0.56 | 0.48 | 0.65 | 0.53 | 0.52 | 0.62 |
| 3  | 0.87 | 0.71 | 0.77 | 0.79 | 0.74 | 0.72 | 0.72 | 0.88 | 0.87 |
| 4  | 0.96 | 0.95 | 0.97 | 0.97 | 0.96 | 0.97 | 0.97 | 0.96 | 0.94 |
| 5  | 0.98 | 0.97 | 0.95 | 0.97 | 0.96 | 0.97 | 0.96 | 0.95 | 0.93 |
| 6  | 0.91 | 0.88 | 0.94 | 0.91 | 0.86 | 0.93 | 0.91 | 0.84 | 0.92 |
| 7  | 0.84 | 0.82 | 0.89 | 0.80 | 0.75 | 0.88 | 0.77 | 0.85 | 0.79 |
| 8  | 0.67 | 0.72 | 0.60 | 0.70 | 0.65 | 0.73 | 0.74 | 0.73 | 0.69 |
| 9  | 0.81 | 0.79 | 0.72 | 0.78 | 0.74 | 0.71 | 0.76 | 0.65 | 0.61 |
| 10 | 0.81 | 0.79 | 0.72 | 0.78 | 0.74 | 0.71 | 0.76 | 0.65 | 0.61 |
| 11 | 0.22 | 0.23 | 0.34 | 0.24 | 0.33 | 0.23 | 0.21 | 0.26 | 0.33 |
| 12 |      |      |      |      |      |      |      |      |      |
| 13 |      |      |      |      |      |      |      |      |      |
| 14 |      |      |      |      |      |      |      |      |      |
| 15 |      |      |      |      |      |      |      |      |      |
| 16 |      |      |      |      |      |      |      |      |      |
| 17 |      |      |      |      |      |      |      |      |      |
| 18 |      |      |      |      |      |      |      |      |      |
| 19 |      |      |      |      |      |      |      |      |      |
| 20 |      |      |      |      |      |      |      |      |      |
| 21 |      |      |      |      |      |      |      |      |      |
| 22 |      |      |      |      |      |      |      |      |      |
| 23 |      |      |      |      |      |      |      |      |      |
| 24 |      |      |      |      |      |      |      |      |      |
| 25 |      |      |      |      |      |      |      |      |      |
| 26 |      |      |      |      |      |      |      |      |      |
| 27 |      |      |      |      |      |      |      |      |      |
| 28 |      |      |      |      |      |      |      |      |      |
| 29 |      |      |      |      |      |      |      |      |      |
| 30 |      |      |      |      |      |      |      |      |      |
| 31 |      |      |      |      |      |      |      |      |      |
| 32 |      |      |      |      |      |      |      |      |      |
| 33 |      |      |      |      |      |      |      |      |      |
| 34 |      |      |      |      |      |      |      |      |      |
| 35 |      |      |      |      |      |      |      |      |      |
| 36 |      |      |      |      |      |      |      |      |      |
| 37 |      |      |      |      |      |      |      |      |      |
| 38 |      |      |      |      |      |      |      |      |      |
| 39 |      |      |      |      |      |      |      |      |      |
| 40 |      |      |      |      |      |      |      |      |      |
| 41 |      |      |      |      |      |      |      |      |      |
| 42 |      |      |      |      |      |      |      |      |      |
| 43 |      |      |      |      |      |      |      |      |      |
| 44 |      |      |      |      |      |      |      |      |      |
| 45 |      |      |      |      |      |      |      |      |      |
| 46 |      |      |      |      |      |      |      |      |      |
| 47 |      |      |      |      |      |      |      |      |      |
| 48 |      |      |      |      |      |      |      |      |      |
| 49 |      |      |      |      |      |      |      |      |      |
| 50 |      |      |      |      |      |      |      |      |      |
| 51 |      |      |      |      |      |      |      |      |      |
| 52 |      |      |      |      |      |      |      |      |      |
| 53 |      |      |      |      |      |      |      |      |      |
| 54 |      |      |      |      |      |      |      |      |      |
| 55 |      |      |      |      |      |      |      |      |      |
| 56 |      |      |      |      |      |      |      |      |      |
| 57 |      |      |      |      |      |      |      |      |      |
| 58 |      |      |      |      |      |      |      |      |      |
| 59 |      |      |      |      |      |      |      |      |      |
| 60 |      |      |      |      |      |      |      |      |      |

For peer review only

1  
2  
3  
4  
5  
6  
7  
8  
9  
10  
11  
12  
13  
14  
15  
16  
17  
18  
19  
20  
21  
22  
23  
24  
25  
26  
27  
28  
29  
30  
31  
32  
33  
34  
35  
36  
37  
38  
39  
40  
41  
42  
43  
44  
45  
46  
47  
48  
49  
50  
51  
52  
53  
54  
55  
56  
57  
58  
59  
60

|  | <b>RD1</b> | <b>RJL</b> | <b>RXF</b> | <b>RQ8</b> | <b>RXQ</b> | <b>RTF</b> | <b>RD3</b> | <b>RW6</b> | <b>RNA</b> |
|--|------------|------------|------------|------------|------------|------------|------------|------------|------------|
|  | 0.70       | 0.72       | 0.74       | 0.72       | 0.77       | 0.75       | 0.70       | 0.69       | 0.74       |
|  | 0.59       | 0.53       | 0.56       | 0.63       | 0.55       | 0.65       | 0.62       | 0.51       | 0.59       |
|  | 0.48       | 0.52       | 0.55       | 0.54       | 0.51       | 0.49       | 0.55       | 0.53       | 0.52       |
|  | 0.64       | 0.63       | 0.63       | 0.72       | 0.69       | 0.57       | 0.60       | 0.52       | 0.60       |
|  | 0.78       | 0.82       | 0.77       | 0.84       | 0.77       | 0.79       | 0.81       | 0.73       | 0.80       |
|  | 0.75       | 0.72       | 0.78       | 0.75       | 0.72       | 0.81       | 0.70       | 0.69       | 0.76       |
|  | 0.55       | 0.52       | 0.55       | 0.53       | 0.55       | 0.62       | 0.51       | 0.54       | 0.55       |
|  | 0.84       | 0.80       | 0.82       | 0.83       | 0.85       | 0.88       | 0.85       | 0.85       | 0.86       |
|  | 0.77       | 0.76       | 0.77       | 0.81       | 0.76       | 0.81       | 0.78       | 0.74       | 0.75       |
|  | 0.84       | 0.81       | 0.83       | 0.84       | 0.83       | 0.87       | 0.82       | 0.82       | 0.84       |
|  | 0.74       | 0.72       | 0.75       | 0.72       | 0.71       | 0.77       | 0.77       | 0.73       | 0.73       |
|  | 0.89       | 0.91       | 0.88       | 0.89       | 0.83       | 0.91       | 0.85       | 0.90       | 0.91       |
|  | 0.81       | 0.77       | 0.81       | 0.79       | 0.82       | 0.84       | 0.78       | 0.78       | 0.80       |
|  | 0.65       | 0.69       | 0.72       | 0.70       | 0.63       | 0.77       | 0.70       | 0.63       | 0.66       |
|  | 0.88       | 0.87       | 0.89       | 0.86       | 0.84       | 0.87       | 0.89       | 0.84       | 0.84       |
|  | 0.90       | 0.90       | 0.87       | 0.91       | 0.90       | 0.88       | 0.90       | 0.86       | 0.88       |
|  | 0.81       | 0.76       | 0.78       | 0.79       | 0.78       | 0.81       | 0.78       | 0.74       | 0.77       |
|  | 0.71       | 0.69       | 0.73       | 0.75       | 0.69       | 0.79       | 0.65       | 0.67       | 0.67       |
|  | 0.75       | 0.80       | 0.71       | 0.73       | 0.80       | 0.78       | 0.76       | 0.69       | 0.77       |
|  | 0.77       | 0.68       | 0.74       | 0.76       | 0.73       | 0.74       | 0.70       | 0.73       | 0.74       |
|  | 0.67       | 0.58       | 0.58       | 0.58       | 0.65       | 0.66       | 0.66       | 0.57       | 0.56       |
|  | 0.71       | 0.68       | 0.76       | 0.74       | 0.70       | 0.81       | 0.73       | 0.65       | 0.67       |
|  | 0.95       | 0.95       | 0.94       | 0.98       | 0.94       | 0.93       | 0.96       | 0.95       | 0.98       |
|  | 0.85       | 0.86       | 0.83       | 0.85       | 0.84       | 0.87       | 0.88       | 0.82       | 0.84       |
|  | 0.90       | 0.85       | 0.88       | 0.87       | 0.87       | 0.91       | 0.91       | 0.88       | 0.84       |
|  | 0.34       | 0.35       | 0.38       | 0.33       | 0.30       | 0.38       | 0.36       | 0.35       | 0.35       |
|  | 0.63       | 0.62       | 0.64       | 0.62       | 0.61       | 0.67       | 0.65       | 0.57       | 0.62       |
|  | 0.83       | 0.88       | 0.83       | 0.89       | 0.84       | 0.84       | 0.87       | 0.80       | 0.85       |
|  | 0.82       | 0.85       | 0.87       | 0.87       | 0.86       | 0.89       | 0.82       | 0.84       | 0.87       |
|  | 0.80       | 0.81       | 0.80       | 0.84       | 0.81       | 0.83       | 0.81       | 0.78       | 0.82       |
|  | 0.84       | 0.81       | 0.81       | 0.88       | 0.86       | 0.83       | 0.88       | 0.76       | 0.89       |
|  | 0.87       | 0.84       | 0.86       | 0.85       | 0.87       | 0.86       | 0.84       | 0.86       | 0.85       |
|  | 0.95       | 0.94       | 0.95       | 0.93       | 0.95       | 0.97       | 0.96       | 0.91       | 0.94       |
|  | 0.84       | 0.80       | 0.83       | 0.80       | 0.86       | 0.88       | 0.89       | 0.80       | 0.83       |
|  | 0.92       | 0.89       | 0.89       | 0.90       | 0.87       | 0.92       | 0.93       | 0.83       | 0.89       |
|  | 0.85       | 0.74       | 0.83       | 0.79       | 0.78       | 0.82       | 0.76       | 0.78       | 0.78       |
|  | 0.40       | 0.42       | 0.43       | 0.47       | 0.33       | 0.57       | 0.52       | 0.40       | 0.39       |
|  | 0.92       | 0.95       | 0.94       | 0.93       | 0.94       | 0.90       | 0.95       | 0.90       | 0.94       |
|  | 0.61       | 0.66       | 0.56       | 0.72       | 0.74       | 0.68       | 0.71       | 0.63       | 0.59       |
|  | 0.46       | 0.50       | 0.52       | 0.53       | 0.44       | 0.63       | 0.65       | 0.48       | 0.45       |
|  | 0.93       | 0.84       | 0.91       | 0.89       | 0.91       | 0.91       | 0.92       | 0.86       | 0.88       |
|  | 0.90       | 0.90       | 0.90       | 0.86       | 0.80       | 0.91       | 0.91       | 0.82       | 0.84       |

|    |      |      |      |      |      |      |      |      |      |
|----|------|------|------|------|------|------|------|------|------|
| 1  |      |      |      |      |      |      |      |      |      |
| 2  | 0.59 | 0.51 | 0.55 | 0.62 | 0.60 | 0.65 | 0.58 | 0.57 | 0.59 |
| 3  | 0.74 | 0.67 | 0.78 | 0.72 | 0.75 | 0.73 | 0.74 | 0.73 | 0.82 |
| 4  | 0.97 | 0.94 | 0.95 | 0.97 | 0.95 | 0.98 | 0.95 | 0.94 | 0.94 |
| 5  | 0.97 | 0.95 | 0.97 | 0.97 | 0.96 | 0.97 | 0.97 | 0.94 | 0.93 |
| 6  | 0.90 | 0.88 | 0.84 | 0.91 | 0.90 | 0.92 | 0.94 | 0.88 | 0.86 |
| 7  | 0.85 | 0.78 | 0.82 | 0.81 | 0.87 | 0.82 | 0.84 | 0.80 | 0.87 |
| 8  | 0.74 | 0.68 | 0.70 | 0.66 | 0.66 | 0.69 | 0.73 | 0.70 | 0.53 |
| 9  | 0.67 | 0.68 | 0.72 | 0.67 | 0.74 | 0.84 | 0.79 | 0.63 | 0.46 |
| 10 | 0.67 | 0.68 | 0.72 | 0.67 | 0.74 | 0.84 | 0.79 | 0.63 | 0.46 |
| 11 | 0.28 | 0.22 | 0.31 | 0.20 | 0.27 | 0.19 | 0.23 | 0.18 | 0.23 |
| 12 |      |      |      |      |      |      |      |      |      |
| 13 |      |      |      |      |      |      |      |      |      |
| 14 |      |      |      |      |      |      |      |      |      |
| 15 |      |      |      |      |      |      |      |      |      |
| 16 |      |      |      |      |      |      |      |      |      |
| 17 |      |      |      |      |      |      |      |      |      |
| 18 |      |      |      |      |      |      |      |      |      |
| 19 |      |      |      |      |      |      |      |      |      |
| 20 |      |      |      |      |      |      |      |      |      |
| 21 |      |      |      |      |      |      |      |      |      |
| 22 |      |      |      |      |      |      |      |      |      |
| 23 |      |      |      |      |      |      |      |      |      |
| 24 |      |      |      |      |      |      |      |      |      |
| 25 |      |      |      |      |      |      |      |      |      |
| 26 |      |      |      |      |      |      |      |      |      |
| 27 |      |      |      |      |      |      |      |      |      |
| 28 |      |      |      |      |      |      |      |      |      |
| 29 |      |      |      |      |      |      |      |      |      |
| 30 |      |      |      |      |      |      |      |      |      |
| 31 |      |      |      |      |      |      |      |      |      |
| 32 |      |      |      |      |      |      |      |      |      |
| 33 |      |      |      |      |      |      |      |      |      |
| 34 |      |      |      |      |      |      |      |      |      |
| 35 |      |      |      |      |      |      |      |      |      |
| 36 |      |      |      |      |      |      |      |      |      |
| 37 |      |      |      |      |      |      |      |      |      |
| 38 |      |      |      |      |      |      |      |      |      |
| 39 |      |      |      |      |      |      |      |      |      |
| 40 |      |      |      |      |      |      |      |      |      |
| 41 |      |      |      |      |      |      |      |      |      |
| 42 |      |      |      |      |      |      |      |      |      |
| 43 |      |      |      |      |      |      |      |      |      |
| 44 |      |      |      |      |      |      |      |      |      |
| 45 |      |      |      |      |      |      |      |      |      |
| 46 |      |      |      |      |      |      |      |      |      |
| 47 |      |      |      |      |      |      |      |      |      |
| 48 |      |      |      |      |      |      |      |      |      |
| 49 |      |      |      |      |      |      |      |      |      |
| 50 |      |      |      |      |      |      |      |      |      |
| 51 |      |      |      |      |      |      |      |      |      |
| 52 |      |      |      |      |      |      |      |      |      |
| 53 |      |      |      |      |      |      |      |      |      |
| 54 |      |      |      |      |      |      |      |      |      |
| 55 |      |      |      |      |      |      |      |      |      |
| 56 |      |      |      |      |      |      |      |      |      |
| 57 |      |      |      |      |      |      |      |      |      |
| 58 |      |      |      |      |      |      |      |      |      |
| 59 |      |      |      |      |      |      |      |      |      |
| 60 |      |      |      |      |      |      |      |      |      |

For peer review only



1  
2  
3  
4  
5  
6  
7  
8  
9  
10  
11  
12  
13  
14  
15  
16  
17  
18  
19  
20  
21  
22  
23  
24  
25  
26  
27  
28  
29  
30  
31  
32  
33  
34  
35  
36  
37  
38  
39  
40  
41  
42  
43  
44  
45  
46  
47  
48  
49  
50  
51  
52  
53  
54  
55  
56  
57  
58  
59  
60

|  | <b>RA9</b> | <b>RA2</b> | <b>RTX</b> | <b>RXC</b> | <b>RXL</b> | <b>RBA</b> | <b>RAJ</b> | <b>RRK</b> | <b>RHU</b> |
|--|------------|------------|------------|------------|------------|------------|------------|------------|------------|
|  | 0.80       | 0.74       | 0.74       | 0.73       | 0.76       | 0.76       | 0.75       | 0.70       | 0.73       |
|  | 0.66       | 0.58       | 0.62       | 0.55       | 0.56       | 0.62       | 0.61       | 0.57       | 0.60       |
|  | 0.61       | 0.49       | 0.54       | 0.52       | 0.52       | 0.58       | 0.56       | 0.51       | 0.48       |
|  | 0.65       | 0.66       | 0.66       | 0.62       | 0.54       | 0.67       | 0.59       | 0.63       | 0.55       |
|  | 0.81       | 0.80       | 0.84       | 0.82       | 0.81       | 0.82       | 0.78       | 0.78       | 0.83       |
|  | 0.77       | 0.73       | 0.76       | 0.71       | 0.73       | 0.77       | 0.72       | 0.73       | 0.74       |
|  | 0.63       | 0.55       | 0.57       | 0.51       | 0.52       | 0.58       | 0.57       | 0.60       | 0.58       |
|  | 0.88       | 0.87       | 0.86       | 0.84       | 0.84       | 0.85       | 0.86       | 0.85       | 0.87       |
|  | 0.78       | 0.77       | 0.78       | 0.76       | 0.77       | 0.77       | 0.83       | 0.72       | 0.76       |
|  | 0.85       | 0.83       | 0.86       | 0.82       | 0.82       | 0.84       | 0.84       | 0.84       | 0.84       |
|  | 0.82       | 0.71       | 0.77       | 0.77       | 0.74       | 0.82       | 0.72       | 0.73       | 0.73       |
|  | 0.87       | 0.87       | 0.88       | 0.79       | 0.83       | 0.88       | 0.85       | 0.90       | 0.86       |
|  | 0.84       | 0.77       | 0.82       | 0.77       | 0.78       | 0.84       | 0.80       | 0.80       | 0.81       |
|  | 0.73       | 0.65       | 0.71       | 0.65       | 0.67       | 0.72       | 0.69       | 0.63       | 0.67       |
|  | 0.86       | 0.81       | 0.84       | 0.83       | 0.89       | 0.91       | 0.85       | 0.85       | 0.84       |
|  | 0.88       | 0.88       | 0.89       | 0.88       | 0.89       | 0.94       | 0.86       | 0.88       | 0.89       |
|  | 0.86       | 0.79       | 0.81       | 0.78       | 0.78       | 0.81       | 0.75       | 0.79       | 0.80       |
|  | 0.70       | 0.63       | 0.77       | 0.68       | 0.68       | 0.72       | 0.62       | 0.61       | 0.61       |
|  | 0.78       | 0.71       | 0.79       | 0.73       | 0.74       | 0.81       | 0.73       | 0.71       | 0.75       |
|  | 0.80       | 0.76       | 0.74       | 0.73       | 0.73       | 0.81       | 0.76       | 0.75       | 0.72       |
|  | 0.63       | 0.59       | 0.71       | 0.66       | 0.59       | 0.70       | 0.60       | 0.65       | 0.61       |
|  | 0.78       | 0.71       | 0.79       | 0.69       | 0.74       | 0.78       | 0.75       | 0.67       | 0.67       |
|  | 0.95       | 0.96       | 0.96       | 0.98       | 0.96       | 0.96       | 0.95       | 0.95       | 0.95       |
|  | 0.87       | 0.86       | 0.85       | 0.86       | 0.86       | 0.89       | 0.83       | 0.84       | 0.88       |
|  | 0.90       | 0.84       | 0.88       | 0.86       | 0.88       | 0.90       | 0.89       | 0.86       | 0.85       |
|  | 0.34       | 0.30       | 0.40       | 0.28       | 0.41       | 0.40       | 0.29       | 0.36       | 0.30       |
|  | 0.67       | 0.62       | 0.68       | 0.61       | 0.62       | 0.70       | 0.64       | 0.59       | 0.62       |
|  | 0.87       | 0.82       | 0.88       | 0.85       | 0.85       | 0.90       | 0.87       | 0.81       | 0.85       |
|  | 0.90       | 0.84       | 0.88       | 0.87       | 0.86       | 0.89       | 0.83       | 0.84       | 0.83       |
|  | 0.89       | 0.81       | 0.81       | 0.79       | 0.80       | 0.85       | 0.84       | 0.76       | 0.84       |
|  | 0.90       | 0.88       | 0.88       | 0.85       | 0.86       | 0.88       | 0.90       | 0.88       | 0.85       |
|  | 0.85       | 0.79       | 0.83       | 0.81       | 0.85       | 0.87       | 0.85       | 0.81       | 0.82       |
|  | 0.96       | 0.95       | 0.95       | 0.95       | 0.91       | 0.96       | 0.96       | 0.94       | 0.93       |
|  | 0.88       | 0.84       | 0.88       | 0.81       | 0.82       | 0.85       | 0.84       | 0.82       | 0.80       |
|  | 0.89       | 0.92       | 0.91       | 0.84       | 0.90       | 0.91       | 0.91       | 0.86       | 0.89       |
|  | 0.81       | 0.80       | 0.83       | 0.76       | 0.86       | 0.89       | 0.81       | 0.75       | 0.79       |
|  | 0.40       | 0.48       | 0.52       | 0.41       | 0.53       | 0.44       | 0.47       | 0.42       | 0.44       |
|  | 0.96       | 0.94       | 0.91       | 0.95       | 0.93       | 0.95       | 0.97       | 0.95       | 0.95       |
|  | 0.75       | 0.69       | 0.74       | 0.70       | 0.73       | 0.81       | 0.66       | 0.59       | 0.64       |
|  | 0.52       | 0.56       | 0.59       | 0.47       | 0.60       | 0.51       | 0.63       | 0.50       | 0.49       |
|  | 0.93       | 0.88       | 0.90       | 0.88       | 0.91       | 0.93       | 0.91       | 0.91       | 0.90       |
|  | 0.87       | 0.87       | 0.88       | 0.83       | 0.84       | 0.90       | 0.87       | 0.88       | 0.82       |

|    |      |      |      |      |      |      |      |      |      |
|----|------|------|------|------|------|------|------|------|------|
| 1  |      |      |      |      |      |      |      |      |      |
| 2  | 0.75 | 0.38 | 0.65 | 0.51 | 0.61 | 0.60 | 0.57 | 0.57 | 0.51 |
| 3  | 0.81 | 0.75 | 0.81 | 0.71 | 0.76 | 0.77 | 0.74 | 0.80 | 0.80 |
| 4  | 0.94 | 0.95 | 0.97 | 0.97 | 0.96 | 0.98 | 0.98 | 0.94 | 0.94 |
| 5  | 0.97 | 0.94 | 0.95 | 0.96 | 0.98 | 0.98 | 0.93 | 0.96 | 0.96 |
| 6  | 0.92 | 0.90 | 0.90 | 0.93 | 0.95 | 0.92 | 0.89 | 0.90 | 0.91 |
| 7  | 0.92 | 0.82 | 0.85 | 0.75 | 0.83 | 0.88 | 0.92 | 0.76 | 0.89 |
| 8  | 0.68 | 0.67 | 0.73 | 0.78 | 0.53 | 0.73 | 0.55 | 0.64 | 0.63 |
| 9  | 0.77 | 0.65 | 0.74 | 0.67 | 0.71 | 0.86 | 0.70 | 0.64 | 0.66 |
| 10 | 0.77 | 0.65 | 0.74 | 0.67 | 0.71 | 0.86 | 0.70 | 0.64 | 0.66 |
| 11 | 0.20 | 0.25 | 0.30 | 0.22 | 0.21 | 0.26 | 0.24 | 0.39 | 0.24 |
| 12 |      |      |      |      |      |      |      |      |      |
| 13 |      |      |      |      |      |      |      |      |      |
| 14 |      |      |      |      |      |      |      |      |      |
| 15 |      |      |      |      |      |      |      |      |      |
| 16 |      |      |      |      |      |      |      |      |      |
| 17 |      |      |      |      |      |      |      |      |      |
| 18 |      |      |      |      |      |      |      |      |      |
| 19 |      |      |      |      |      |      |      |      |      |
| 20 |      |      |      |      |      |      |      |      |      |
| 21 |      |      |      |      |      |      |      |      |      |
| 22 |      |      |      |      |      |      |      |      |      |
| 23 |      |      |      |      |      |      |      |      |      |
| 24 |      |      |      |      |      |      |      |      |      |
| 25 |      |      |      |      |      |      |      |      |      |
| 26 |      |      |      |      |      |      |      |      |      |
| 27 |      |      |      |      |      |      |      |      |      |
| 28 |      |      |      |      |      |      |      |      |      |
| 29 |      |      |      |      |      |      |      |      |      |
| 30 |      |      |      |      |      |      |      |      |      |
| 31 |      |      |      |      |      |      |      |      |      |
| 32 |      |      |      |      |      |      |      |      |      |
| 33 |      |      |      |      |      |      |      |      |      |
| 34 |      |      |      |      |      |      |      |      |      |
| 35 |      |      |      |      |      |      |      |      |      |
| 36 |      |      |      |      |      |      |      |      |      |
| 37 |      |      |      |      |      |      |      |      |      |
| 38 |      |      |      |      |      |      |      |      |      |
| 39 |      |      |      |      |      |      |      |      |      |
| 40 |      |      |      |      |      |      |      |      |      |
| 41 |      |      |      |      |      |      |      |      |      |
| 42 |      |      |      |      |      |      |      |      |      |
| 43 |      |      |      |      |      |      |      |      |      |
| 44 |      |      |      |      |      |      |      |      |      |
| 45 |      |      |      |      |      |      |      |      |      |
| 46 |      |      |      |      |      |      |      |      |      |
| 47 |      |      |      |      |      |      |      |      |      |
| 48 |      |      |      |      |      |      |      |      |      |
| 49 |      |      |      |      |      |      |      |      |      |
| 50 |      |      |      |      |      |      |      |      |      |
| 51 |      |      |      |      |      |      |      |      |      |
| 52 |      |      |      |      |      |      |      |      |      |
| 53 |      |      |      |      |      |      |      |      |      |
| 54 |      |      |      |      |      |      |      |      |      |
| 55 |      |      |      |      |      |      |      |      |      |
| 56 |      |      |      |      |      |      |      |      |      |
| 57 |      |      |      |      |      |      |      |      |      |
| 58 |      |      |      |      |      |      |      |      |      |
| 59 |      |      |      |      |      |      |      |      |      |
| 60 |      |      |      |      |      |      |      |      |      |

For peer review only

1  
2  
3  
4  
5  
6  
7  
8  
9  
10  
11  
12  
13  
14  
15  
16  
17  
18  
19  
20  
21  
22  
23  
24  
25  
26  
27  
28  
29  
30  
31  
32  
33  
34  
35  
36  
37  
38  
39  
40  
41  
42  
43  
44  
45  
46  
47  
48  
49  
50  
51  
52  
53  
54  
55  
56  
57  
58  
59  
60

| <b>RXR</b> | <b>RJ7</b> | <b>RR1</b> | <b>RYR</b> | <b>RXN</b> | <b>RYJ</b> | <b>RX1</b> | <b>RWD</b> | <b>RL4</b> |
|------------|------------|------------|------------|------------|------------|------------|------------|------------|
| 0.75       | 0.71       | 0.76       | 0.71       | 0.77       | 0.70       | 0.74       | 0.74       | 0.72       |
| 0.53       | 0.56       | 0.55       | 0.56       | 0.60       | 0.55       | 0.54       | 0.48       | 0.57       |
| 0.50       | 0.54       | 0.47       | 0.61       | 0.51       | 0.50       | 0.49       | 0.51       | 0.49       |
| 0.60       | 0.60       | 0.61       | 0.58       | 0.61       | 0.61       | 0.57       | 0.57       | 0.53       |
| 0.77       | 0.79       | 0.78       | 0.83       | 0.77       | 0.74       | 0.78       | 0.76       | 0.81       |
| 0.67       | 0.71       | 0.72       | 0.71       | 0.73       | 0.68       | 0.74       | 0.69       | 0.74       |
| 0.49       | 0.53       | 0.56       | 0.53       | 0.57       | 0.49       | 0.56       | 0.51       | 0.54       |
| 0.85       | 0.84       | 0.87       | 0.87       | 0.87       | 0.82       | 0.85       | 0.83       | 0.86       |
| 0.77       | 0.75       | 0.78       | 0.77       | 0.81       | 0.71       | 0.78       | 0.80       | 0.74       |
| 0.81       | 0.82       | 0.83       | 0.81       | 0.84       | 0.80       | 0.85       | 0.80       | 0.84       |
| 0.69       | 0.75       | 0.71       | 0.77       | 0.74       | 0.70       | 0.71       | 0.67       | 0.71       |
| 0.84       | 0.83       | 0.88       | 0.84       | 0.87       | 0.81       | 0.88       | 0.88       | 0.83       |
| 0.77       | 0.76       | 0.79       | 0.81       | 0.84       | 0.72       | 0.78       | 0.76       | 0.80       |
| 0.62       | 0.62       | 0.64       | 0.66       | 0.69       | 0.61       | 0.64       | 0.61       | 0.64       |
| 0.85       | 0.84       | 0.84       | 0.84       | 0.82       | 0.81       | 0.86       | 0.84       | 0.84       |
| 0.87       | 0.84       | 0.87       | 0.92       | 0.86       | 0.85       | 0.88       | 0.87       | 0.88       |
| 0.76       | 0.75       | 0.76       | 0.77       | 0.79       | 0.71       | 0.78       | 0.74       | 0.76       |
| 0.64       | 0.67       | 0.69       | 0.65       | 0.64       | 0.70       | 0.61       | 0.60       | 0.65       |
| 0.70       | 0.69       | 0.72       | 0.74       | 0.73       | 0.66       | 0.71       | 0.71       | 0.69       |
| 0.68       | 0.73       | 0.76       | 0.76       | 0.80       | 0.66       | 0.77       | 0.71       | 0.76       |
| 0.63       | 0.59       | 0.58       | 0.61       | 0.65       | 0.51       | 0.59       | 0.59       | 0.57       |
| 0.68       | 0.67       | 0.67       | 0.71       | 0.74       | 0.65       | 0.70       | 0.62       | 0.68       |
| 0.96       | 0.95       | 0.96       | 0.95       | 0.96       | 0.93       | 0.97       | 0.96       | 0.97       |
| 0.80       | 0.86       | 0.83       | 0.87       | 0.85       | 0.80       | 0.82       | 0.79       | 0.81       |
| 0.87       | 0.91       | 0.85       | 0.88       | 0.89       | 0.85       | 0.89       | 0.88       | 0.85       |
| 0.41       | 0.29       | 0.32       | 0.25       | 0.35       | 0.31       | 0.37       | 0.30       | 0.30       |
| 0.60       | 0.55       | 0.59       | 0.64       | 0.66       | 0.51       | 0.59       | 0.55       | 0.61       |
| 0.78       | 0.83       | 0.80       | 0.85       | 0.81       | 0.76       | 0.89       | 0.80       | 0.79       |
| 0.80       | 0.82       | 0.88       | 0.83       | 0.84       | 0.78       | 0.85       | 0.76       | 0.83       |
| 0.76       | 0.79       | 0.80       | 0.83       | 0.83       | 0.79       | 0.85       | 0.77       | 0.83       |
| 0.80       | 0.82       | 0.86       | 0.88       | 0.88       | 0.80       | 0.87       | 0.83       | 0.83       |
| 0.82       | 0.82       | 0.84       | 0.84       | 0.87       | 0.77       | 0.84       | 0.84       | 0.79       |
| 0.94       | 0.94       | 0.93       | 0.94       | 0.95       | 0.92       | 0.94       | 0.93       | 0.95       |
| 0.80       | 0.81       | 0.81       | 0.86       | 0.81       | 0.76       | 0.82       | 0.80       | 0.77       |
| 0.86       | 0.84       | 0.87       | 0.86       | 0.88       | 0.83       | 0.87       | 0.87       | 0.89       |
| 0.81       | 0.84       | 0.79       | 0.85       | 0.84       | 0.79       | 0.79       | 0.80       | 0.87       |
| 0.54       | 0.35       | 0.42       | 0.39       | 0.52       | 0.35       | 0.41       | 0.37       | 0.41       |
| 0.91       | 0.93       | 0.90       | 0.94       | 0.94       | 0.89       | 0.94       | 0.93       | 0.93       |
| 0.59       | 0.68       | 0.66       | 0.72       | 0.65       | 0.64       | 0.64       | 0.60       | 0.56       |
| 0.67       | 0.41       | 0.55       | 0.43       | 0.62       | 0.39       | 0.48       | 0.42       | 0.47       |
| 0.91       | 0.84       | 0.88       | 0.89       | 0.90       | 0.82       | 0.89       | 0.82       | 0.91       |
| 0.87       | 0.83       | 0.86       | 0.82       | 0.88       | 0.80       | 0.86       | 0.87       | 0.86       |

|    |      |      |      |      |      |      |      |      |      |
|----|------|------|------|------|------|------|------|------|------|
| 1  |      |      |      |      |      |      |      |      |      |
| 2  | 0.53 | 0.51 | 0.56 | 0.53 | 0.56 | 0.56 | 0.51 | 0.50 | 0.59 |
| 3  | 0.85 | 0.73 | 0.89 | 0.77 | 0.86 | 0.68 | 0.80 | 0.77 | 0.85 |
| 4  | 0.94 | 0.93 | 0.96 | 0.96 | 0.94 | 0.90 | 0.95 | 0.94 | 0.96 |
| 5  | 0.95 | 0.95 | 0.95 | 0.95 | 0.96 | 0.93 | 0.96 | 0.92 | 0.94 |
| 6  | 0.93 | 0.89 | 0.89 | 0.90 | 0.92 | 0.94 | 0.93 | 0.86 | 0.89 |
| 7  | 0.80 | 0.81 | 0.82 | 0.83 | 0.87 | 0.85 | 0.90 | 0.78 | 0.82 |
| 8  | 0.67 | 0.55 | 0.62 | 0.77 | 0.69 | 0.59 | 0.73 | 0.65 | 0.59 |
| 9  | 0.69 | 0.55 | 0.66 | 0.69 | 0.73 | 0.60 | 0.63 | 0.67 | 0.58 |
| 10 | 0.69 | 0.55 | 0.66 | 0.69 | 0.73 | 0.60 | 0.63 | 0.67 | 0.58 |
| 11 | 0.20 | 0.31 | 0.19 | 0.29 | 0.16 | 0.50 | 0.35 | 0.30 | 0.22 |
| 12 |      |      |      |      |      |      |      |      |      |
| 13 |      |      |      |      |      |      |      |      |      |
| 14 |      |      |      |      |      |      |      |      |      |
| 15 |      |      |      |      |      |      |      |      |      |
| 16 |      |      |      |      |      |      |      |      |      |
| 17 |      |      |      |      |      |      |      |      |      |
| 18 |      |      |      |      |      |      |      |      |      |
| 19 |      |      |      |      |      |      |      |      |      |
| 20 |      |      |      |      |      |      |      |      |      |
| 21 |      |      |      |      |      |      |      |      |      |
| 22 |      |      |      |      |      |      |      |      |      |
| 23 |      |      |      |      |      |      |      |      |      |
| 24 |      |      |      |      |      |      |      |      |      |
| 25 |      |      |      |      |      |      |      |      |      |
| 26 |      |      |      |      |      |      |      |      |      |
| 27 |      |      |      |      |      |      |      |      |      |
| 28 |      |      |      |      |      |      |      |      |      |
| 29 |      |      |      |      |      |      |      |      |      |
| 30 |      |      |      |      |      |      |      |      |      |
| 31 |      |      |      |      |      |      |      |      |      |
| 32 |      |      |      |      |      |      |      |      |      |
| 33 |      |      |      |      |      |      |      |      |      |
| 34 |      |      |      |      |      |      |      |      |      |
| 35 |      |      |      |      |      |      |      |      |      |
| 36 |      |      |      |      |      |      |      |      |      |
| 37 |      |      |      |      |      |      |      |      |      |
| 38 |      |      |      |      |      |      |      |      |      |
| 39 |      |      |      |      |      |      |      |      |      |
| 40 |      |      |      |      |      |      |      |      |      |
| 41 |      |      |      |      |      |      |      |      |      |
| 42 |      |      |      |      |      |      |      |      |      |
| 43 |      |      |      |      |      |      |      |      |      |
| 44 |      |      |      |      |      |      |      |      |      |
| 45 |      |      |      |      |      |      |      |      |      |
| 46 |      |      |      |      |      |      |      |      |      |
| 47 |      |      |      |      |      |      |      |      |      |
| 48 |      |      |      |      |      |      |      |      |      |
| 49 |      |      |      |      |      |      |      |      |      |
| 50 |      |      |      |      |      |      |      |      |      |
| 51 |      |      |      |      |      |      |      |      |      |
| 52 |      |      |      |      |      |      |      |      |      |
| 53 |      |      |      |      |      |      |      |      |      |
| 54 |      |      |      |      |      |      |      |      |      |
| 55 |      |      |      |      |      |      |      |      |      |
| 56 |      |      |      |      |      |      |      |      |      |
| 57 |      |      |      |      |      |      |      |      |      |
| 58 |      |      |      |      |      |      |      |      |      |
| 59 |      |      |      |      |      |      |      |      |      |
| 60 |      |      |      |      |      |      |      |      |      |

For peer review only

1  
2  
3  
4  
5  
6  
7  
8  
9  
10  
11  
12  
13  
14  
15  
16  
17  
18  
19  
20  
21  
22  
23  
24  
25  
26  
27  
28  
29  
30  
31  
32  
33  
34  
35  
36  
37  
38  
39  
40  
41  
42  
43  
44  
45  
46  
47  
48  
49  
50  
51  
52  
53  
54  
55  
56  
57  
58  
59  
60

| <b>RN5</b> | <b>RDU</b> | <b>RBV</b> | <b>RA7</b> | <b>REF</b> | <b>RAL</b> | <b>RKB</b> | <b>RTR</b> | <b>RJZ</b> |
|------------|------------|------------|------------|------------|------------|------------|------------|------------|
| 0.70       | 0.72       | 0.72       | 0.72       | 0.77       | 0.70       | 0.71       | 0.72       | 0.69       |
| 0.56       | 0.58       | 0.60       | 0.55       | 0.60       | 0.52       | 0.58       | 0.60       | 0.52       |
| 0.56       | 0.53       | 0.58       | 0.50       | 0.50       | 0.46       | 0.48       | 0.55       | 0.53       |
| 0.46       | 0.61       | 0.62       | 0.62       | 0.59       | 0.58       | 0.62       | 0.58       | 0.58       |
| 0.82       | 0.80       | 0.77       | 0.79       | 0.82       | 0.73       | 0.79       | 0.79       | 0.76       |
| 0.71       | 0.71       | 0.74       | 0.74       | 0.75       | 0.66       | 0.74       | 0.74       | 0.71       |
| 0.48       | 0.51       | 0.55       | 0.50       | 0.55       | 0.47       | 0.58       | 0.53       | 0.49       |
| 0.83       | 0.84       | 0.81       | 0.82       | 0.85       | 0.79       | 0.83       | 0.83       | 0.81       |
| 0.73       | 0.78       | 0.74       | 0.78       | 0.76       | 0.73       | 0.75       | 0.74       | 0.74       |
| 0.81       | 0.82       | 0.84       | 0.81       | 0.84       | 0.76       | 0.85       | 0.84       | 0.79       |
| 0.75       | 0.76       | 0.74       | 0.71       | 0.70       | 0.70       | 0.69       | 0.73       | 0.66       |
| 0.81       | 0.82       | 0.86       | 0.85       | 0.87       | 0.84       | 0.86       | 0.89       | 0.82       |
| 0.78       | 0.78       | 0.79       | 0.78       | 0.84       | 0.73       | 0.80       | 0.78       | 0.77       |
| 0.63       | 0.64       | 0.63       | 0.64       | 0.68       | 0.60       | 0.68       | 0.68       | 0.61       |
| 0.89       | 0.85       | 0.82       | 0.83       | 0.83       | 0.85       | 0.78       | 0.88       | 0.82       |
| 0.90       | 0.90       | 0.90       | 0.89       | 0.87       | 0.88       | 0.86       | 0.90       | 0.85       |
| 0.76       | 0.79       | 0.79       | 0.78       | 0.79       | 0.72       | 0.77       | 0.78       | 0.74       |
| 0.67       | 0.66       | 0.70       | 0.65       | 0.68       | 0.64       | 0.65       | 0.66       | 0.69       |
| 0.76       | 0.77       | 0.82       | 0.74       | 0.77       | 0.71       | 0.68       | 0.77       | 0.68       |
| 0.71       | 0.72       | 0.70       | 0.68       | 0.79       | 0.68       | 0.71       | 0.70       | 0.68       |
| 0.61       | 0.62       | 0.56       | 0.59       | 0.64       | 0.57       | 0.56       | 0.66       | 0.56       |
| 0.74       | 0.69       | 0.70       | 0.68       | 0.73       | 0.62       | 0.69       | 0.73       | 0.69       |
| 0.96       | 0.94       | 0.96       | 0.95       | 0.95       | 0.94       | 0.97       | 0.96       | 0.94       |
| 0.89       | 0.84       | 0.88       | 0.83       | 0.85       | 0.84       | 0.82       | 0.84       | 0.78       |
| 0.86       | 0.89       | 0.87       | 0.88       | 0.86       | 0.88       | 0.88       | 0.86       | 0.87       |
| 0.25       | 0.28       | 0.29       | 0.30       | 0.33       | 0.29       | 0.34       | 0.32       | 0.29       |
| 0.61       | 0.63       | 0.57       | 0.57       | 0.67       | 0.52       | 0.60       | 0.65       | 0.51       |
| 0.89       | 0.86       | 0.87       | 0.87       | 0.87       | 0.83       | 0.81       | 0.82       | 0.80       |
| 0.81       | 0.81       | 0.85       | 0.82       | 0.78       | 0.80       | 0.88       | 0.84       | 0.85       |
| 0.81       | 0.79       | 0.84       | 0.86       | 0.80       | 0.73       | 0.86       | 0.80       | 0.79       |
| 0.85       | 0.84       | 0.89       | 0.86       | 0.88       | 0.85       | 0.87       | 0.82       | 0.85       |
| 0.83       | 0.85       | 0.80       | 0.82       | 0.85       | 0.78       | 0.83       | 0.83       | 0.82       |
| 0.93       | 0.94       | 0.96       | 0.95       | 0.97       | 0.92       | 0.94       | 0.94       | 0.95       |
| 0.88       | 0.83       | 0.84       | 0.80       | 0.85       | 0.76       | 0.82       | 0.83       | 0.77       |
| 0.92       | 0.89       | 0.88       | 0.85       | 0.91       | 0.86       | 0.89       | 0.91       | 0.86       |
| 0.80       | 0.74       | 0.79       | 0.81       | 0.79       | 0.74       | 0.83       | 0.78       | 0.81       |
| 0.37       | 0.46       | 0.56       | 0.33       | 0.45       | 0.39       | 0.41       | 0.47       | 0.37       |
| 0.94       | 0.95       | 0.97       | 0.95       | 0.96       | 0.92       | 0.95       | 0.93       | 0.92       |
| 0.73       | 0.70       | 0.73       | 0.69       | 0.66       | 0.69       | 0.63       | 0.67       | 0.64       |
| 0.46       | 0.61       | 0.59       | 0.42       | 0.56       | 0.42       | 0.50       | 0.56       | 0.46       |
| 0.88       | 0.88       | 0.89       | 0.87       | 0.89       | 0.87       | 0.90       | 0.90       | 0.86       |
| 0.90       | 0.86       | 0.85       | 0.84       | 0.92       | 0.84       | 0.90       | 0.91       | 0.84       |

|    |      |      |      |      |      |      |      |      |      |
|----|------|------|------|------|------|------|------|------|------|
| 1  |      |      |      |      |      |      |      |      |      |
| 2  | 0.51 | 0.50 | 0.57 | 0.59 | 0.60 | 0.50 | 0.59 | 0.50 | 0.48 |
| 3  | 0.69 | 0.69 | 0.70 | 0.75 | 0.79 | 0.68 | 0.74 | 0.78 | 0.76 |
| 4  | 0.94 | 0.96 | 0.94 | 0.95 | 0.96 | 0.93 | 0.94 | 0.97 | 0.93 |
| 5  | 0.95 | 0.95 | 0.96 | 0.95 | 0.97 | 0.96 | 0.96 | 0.96 | 0.93 |
| 6  | 0.91 | 0.90 | 0.88 | 0.94 | 0.92 | 0.89 | 0.92 | 0.90 | 0.89 |
| 7  | 0.79 | 0.83 | 0.85 | 0.88 | 0.82 | 0.80 | 0.86 | 0.83 | 0.83 |
| 8  | 0.73 | 0.63 | 0.64 | 0.65 | 0.79 | 0.55 | 0.55 | 0.75 | 0.60 |
| 9  | 0.66 | 0.66 | 0.61 | 0.67 | 0.68 | 0.65 | 0.68 | 0.72 | 0.56 |
| 10 | 0.66 | 0.66 | 0.61 | 0.67 | 0.68 | 0.65 | 0.68 | 0.72 | 0.56 |
| 11 | 0.23 | 0.16 | 0.36 | 0.35 | 0.33 | 0.31 | 0.33 | 0.25 | 0.33 |
| 12 |      |      |      |      |      |      |      |      |      |
| 13 |      |      |      |      |      |      |      |      |      |
| 14 |      |      |      |      |      |      |      |      |      |
| 15 |      |      |      |      |      |      |      |      |      |
| 16 |      |      |      |      |      |      |      |      |      |
| 17 |      |      |      |      |      |      |      |      |      |
| 18 |      |      |      |      |      |      |      |      |      |
| 19 |      |      |      |      |      |      |      |      |      |
| 20 |      |      |      |      |      |      |      |      |      |
| 21 |      |      |      |      |      |      |      |      |      |
| 22 |      |      |      |      |      |      |      |      |      |
| 23 |      |      |      |      |      |      |      |      |      |
| 24 |      |      |      |      |      |      |      |      |      |
| 25 |      |      |      |      |      |      |      |      |      |
| 26 |      |      |      |      |      |      |      |      |      |
| 27 |      |      |      |      |      |      |      |      |      |
| 28 |      |      |      |      |      |      |      |      |      |
| 29 |      |      |      |      |      |      |      |      |      |
| 30 |      |      |      |      |      |      |      |      |      |
| 31 |      |      |      |      |      |      |      |      |      |
| 32 |      |      |      |      |      |      |      |      |      |
| 33 |      |      |      |      |      |      |      |      |      |
| 34 |      |      |      |      |      |      |      |      |      |
| 35 |      |      |      |      |      |      |      |      |      |
| 36 |      |      |      |      |      |      |      |      |      |
| 37 |      |      |      |      |      |      |      |      |      |
| 38 |      |      |      |      |      |      |      |      |      |
| 39 |      |      |      |      |      |      |      |      |      |
| 40 |      |      |      |      |      |      |      |      |      |
| 41 |      |      |      |      |      |      |      |      |      |
| 42 |      |      |      |      |      |      |      |      |      |
| 43 |      |      |      |      |      |      |      |      |      |
| 44 |      |      |      |      |      |      |      |      |      |
| 45 |      |      |      |      |      |      |      |      |      |
| 46 |      |      |      |      |      |      |      |      |      |
| 47 |      |      |      |      |      |      |      |      |      |
| 48 |      |      |      |      |      |      |      |      |      |
| 49 |      |      |      |      |      |      |      |      |      |
| 50 |      |      |      |      |      |      |      |      |      |
| 51 |      |      |      |      |      |      |      |      |      |
| 52 |      |      |      |      |      |      |      |      |      |
| 53 |      |      |      |      |      |      |      |      |      |
| 54 |      |      |      |      |      |      |      |      |      |
| 55 |      |      |      |      |      |      |      |      |      |
| 56 |      |      |      |      |      |      |      |      |      |
| 57 |      |      |      |      |      |      |      |      |      |
| 58 |      |      |      |      |      |      |      |      |      |
| 59 |      |      |      |      |      |      |      |      |      |
| 60 |      |      |      |      |      |      |      |      |      |

For peer review only

1  
2  
3  
4  
5  
6  
7  
8  
9  
10  
11  
12  
13  
14  
15  
16  
17  
18  
19  
20  
21  
22  
23  
24  
25  
26  
27  
28  
29  
30  
31  
32  
33  
34  
35  
36  
37  
38  
39  
40  
41  
42  
43  
44  
45  
46  
47  
48  
49  
50  
51  
52  
53  
54  
55  
56  
57  
58  
59  
60

| RHM  | RTG  | R1H  | RK9  | RXW  | RR8  | RWP  | RWF  | RJE  |
|------|------|------|------|------|------|------|------|------|
| 0.72 | 0.73 | 0.68 | 0.75 | 0.72 | 0.73 | 0.73 | 0.74 | 0.74 |
| 0.55 | 0.62 | 0.52 | 0.59 | 0.55 | 0.61 | 0.58 | 0.58 | 0.59 |
| 0.47 | 0.53 | 0.48 | 0.46 | 0.51 | 0.50 | 0.48 | 0.58 | 0.50 |
| 0.61 | 0.59 | 0.61 | 0.57 | 0.52 | 0.60 | 0.58 | 0.59 | 0.53 |
| 0.73 | 0.78 | 0.72 | 0.75 | 0.75 | 0.81 | 0.80 | 0.80 | 0.79 |
| 0.70 | 0.72 | 0.69 | 0.73 | 0.69 | 0.75 | 0.71 | 0.76 | 0.73 |
| 0.53 | 0.56 | 0.51 | 0.55 | 0.52 | 0.57 | 0.52 | 0.58 | 0.56 |
| 0.84 | 0.87 | 0.79 | 0.85 | 0.85 | 0.85 | 0.84 | 0.84 | 0.86 |
| 0.77 | 0.77 | 0.71 | 0.75 | 0.76 | 0.78 | 0.74 | 0.79 | 0.76 |
| 0.82 | 0.83 | 0.75 | 0.83 | 0.81 | 0.87 | 0.81 | 0.83 | 0.83 |
| 0.69 | 0.71 | 0.71 | 0.70 | 0.67 | 0.77 | 0.71 | 0.70 | 0.68 |
| 0.84 | 0.85 | 0.87 | 0.89 | 0.79 | 0.88 | 0.89 | 0.89 | 0.87 |
| 0.79 | 0.79 | 0.72 | 0.80 | 0.77 | 0.81 | 0.77 | 0.81 | 0.78 |
| 0.62 | 0.67 | 0.59 | 0.68 | 0.63 | 0.67 | 0.63 | 0.67 | 0.67 |
| 0.84 | 0.88 | 0.82 | 0.82 | 0.81 | 0.87 | 0.87 | 0.84 | 0.86 |
| 0.88 | 0.88 | 0.84 | 0.84 | 0.86 | 0.87 | 0.86 | 0.91 | 0.87 |
| 0.78 | 0.77 | 0.70 | 0.78 | 0.77 | 0.81 | 0.79 | 0.80 | 0.76 |
| 0.64 | 0.69 | 0.66 | 0.65 | 0.63 | 0.66 | 0.70 | 0.64 | 0.63 |
| 0.72 | 0.75 | 0.66 | 0.71 | 0.75 | 0.73 | 0.73 | 0.77 | 0.75 |
| 0.68 | 0.75 | 0.63 | 0.74 | 0.69 | 0.71 | 0.70 | 0.73 | 0.75 |
| 0.57 | 0.64 | 0.55 | 0.67 | 0.62 | 0.60 | 0.68 | 0.65 | 0.58 |
| 0.68 | 0.71 | 0.61 | 0.70 | 0.72 | 0.69 | 0.70 | 0.72 | 0.70 |
| 0.94 | 0.97 | 0.94 | 0.97 | 0.97 | 0.97 | 0.95 | 0.96 | 0.95 |
| 0.87 | 0.82 | 0.79 | 0.83 | 0.80 | 0.86 | 0.84 | 0.83 | 0.83 |
| 0.84 | 0.90 | 0.81 | 0.85 | 0.86 | 0.87 | 0.84 | 0.90 | 0.89 |
| 0.25 | 0.36 | 0.32 | 0.29 | 0.34 | 0.45 | 0.35 | 0.34 | 0.46 |
| 0.56 | 0.62 | 0.51 | 0.61 | 0.58 | 0.61 | 0.64 | 0.66 | 0.58 |
| 0.84 | 0.84 | 0.78 | 0.85 | 0.85 | 0.85 | 0.82 | 0.87 | 0.81 |
| 0.83 | 0.83 | 0.79 | 0.85 | 0.82 | 0.83 | 0.83 | 0.82 | 0.83 |
| 0.78 | 0.84 | 0.73 | 0.85 | 0.81 | 0.87 | 0.77 | 0.80 | 0.79 |
| 0.85 | 0.89 | 0.78 | 0.80 | 0.86 | 0.90 | 0.86 | 0.85 | 0.81 |
| 0.82 | 0.86 | 0.76 | 0.85 | 0.82 | 0.84 | 0.81 | 0.85 | 0.84 |
| 0.95 | 0.96 | 0.92 | 0.95 | 0.95 | 0.94 | 0.95 | 0.95 | 0.94 |
| 0.83 | 0.83 | 0.74 | 0.83 | 0.81 | 0.84 | 0.75 | 0.82 | 0.82 |
| 0.87 | 0.87 | 0.79 | 0.90 | 0.87 | 0.88 | 0.90 | 0.90 | 0.87 |
| 0.76 | 0.77 | 0.79 | 0.76 | 0.83 | 0.77 | 0.88 | 0.82 | 0.84 |
| 0.40 | 0.50 | 0.34 | 0.44 | 0.39 | 0.57 | 0.47 | 0.48 | 0.43 |
| 0.95 | 0.95 | 0.91 | 0.93 | 0.94 | 0.96 | 0.94 | 0.93 | 0.93 |
| 0.64 | 0.70 | 0.60 | 0.59 | 0.65 | 0.62 | 0.64 | 0.76 | 0.61 |
| 0.45 | 0.58 | 0.36 | 0.49 | 0.45 | 0.59 | 0.62 | 0.51 | 0.56 |
| 0.86 | 0.92 | 0.84 | 0.87 | 0.88 | 0.91 | 0.91 | 0.90 | 0.89 |
| 0.85 | 0.87 | 0.80 | 0.85 | 0.82 | 0.85 | 0.84 | 0.89 | 0.86 |

|    |      |      |      |      |      |      |      |      |      |
|----|------|------|------|------|------|------|------|------|------|
| 1  |      |      |      |      |      |      |      |      |      |
| 2  | 0.41 | 0.56 | 0.48 | 0.56 | 0.57 | 0.61 | 0.49 | 0.61 | 0.58 |
| 3  | 0.70 | 0.78 | 0.72 | 0.87 | 0.81 | 0.69 | 0.82 | 0.71 | 0.80 |
| 4  | 0.92 | 0.97 | 0.95 | 0.94 | 0.96 | 0.96 | 0.95 | 0.96 | 0.95 |
| 5  | 0.95 | 0.96 | 0.94 | 0.96 | 0.94 | 0.97 | 0.98 | 0.95 | 0.95 |
| 6  | 0.90 | 0.91 | 0.91 | 0.91 | 0.91 | 0.94 | 0.84 | 0.87 | 0.92 |
| 7  | 0.81 | 0.84 | 0.75 | 0.89 | 0.86 | 0.90 | 0.79 | 0.86 | 0.83 |
| 8  | 0.69 | 0.77 | 0.55 | 0.64 | 0.69 | 0.73 | 0.74 | 0.62 | 0.66 |
| 9  | 0.60 | 0.72 | 0.49 | 0.67 | 0.69 | 0.70 | 0.70 | 0.70 | 0.68 |
| 10 | 0.60 | 0.72 | 0.49 | 0.67 | 0.69 | 0.70 | 0.70 | 0.70 | 0.68 |
| 11 | 0.41 | 0.25 | 0.35 | 0.27 | 0.23 | 0.45 | 0.32 | 0.25 | 0.21 |
| 12 |      |      |      |      |      |      |      |      |      |
| 13 |      |      |      |      |      |      |      |      |      |
| 14 |      |      |      |      |      |      |      |      |      |
| 15 |      |      |      |      |      |      |      |      |      |
| 16 |      |      |      |      |      |      |      |      |      |
| 17 |      |      |      |      |      |      |      |      |      |
| 18 |      |      |      |      |      |      |      |      |      |
| 19 |      |      |      |      |      |      |      |      |      |
| 20 |      |      |      |      |      |      |      |      |      |
| 21 |      |      |      |      |      |      |      |      |      |
| 22 |      |      |      |      |      |      |      |      |      |
| 23 |      |      |      |      |      |      |      |      |      |
| 24 |      |      |      |      |      |      |      |      |      |
| 25 |      |      |      |      |      |      |      |      |      |
| 26 |      |      |      |      |      |      |      |      |      |
| 27 |      |      |      |      |      |      |      |      |      |
| 28 |      |      |      |      |      |      |      |      |      |
| 29 |      |      |      |      |      |      |      |      |      |
| 30 |      |      |      |      |      |      |      |      |      |
| 31 |      |      |      |      |      |      |      |      |      |
| 32 |      |      |      |      |      |      |      |      |      |
| 33 |      |      |      |      |      |      |      |      |      |
| 34 |      |      |      |      |      |      |      |      |      |
| 35 |      |      |      |      |      |      |      |      |      |
| 36 |      |      |      |      |      |      |      |      |      |
| 37 |      |      |      |      |      |      |      |      |      |
| 38 |      |      |      |      |      |      |      |      |      |
| 39 |      |      |      |      |      |      |      |      |      |
| 40 |      |      |      |      |      |      |      |      |      |
| 41 |      |      |      |      |      |      |      |      |      |
| 42 |      |      |      |      |      |      |      |      |      |
| 43 |      |      |      |      |      |      |      |      |      |
| 44 |      |      |      |      |      |      |      |      |      |
| 45 |      |      |      |      |      |      |      |      |      |
| 46 |      |      |      |      |      |      |      |      |      |
| 47 |      |      |      |      |      |      |      |      |      |
| 48 |      |      |      |      |      |      |      |      |      |
| 49 |      |      |      |      |      |      |      |      |      |
| 50 |      |      |      |      |      |      |      |      |      |
| 51 |      |      |      |      |      |      |      |      |      |
| 52 |      |      |      |      |      |      |      |      |      |
| 53 |      |      |      |      |      |      |      |      |      |
| 54 |      |      |      |      |      |      |      |      |      |
| 55 |      |      |      |      |      |      |      |      |      |
| 56 |      |      |      |      |      |      |      |      |      |
| 57 |      |      |      |      |      |      |      |      |      |
| 58 |      |      |      |      |      |      |      |      |      |
| 59 |      |      |      |      |      |      |      |      |      |
| 60 |      |      |      |      |      |      |      |      |      |

For peer review only



1  
2  
3  
4  
5  
6  
7  
8  
9  
10  
11  
12  
13  
14  
15  
16  
17  
18  
19  
20  
21  
22  
23  
24  
25  
26  
27  
28  
29  
30  
31  
32  
33  
34  
35  
36  
37  
38  
39  
40  
41  
42  
43  
44  
45  
46  
47  
48  
49  
50  
51  
52  
53  
54  
55  
56  
57  
58  
59  
60

| <b>RGT</b> | <b>RWA</b> | <b>RJ1</b> | <b>RRV</b> | <b>RH8</b> | <b>RVV</b> | <b>RM1</b> | <b>RTD</b> | <b>RTE</b> |
|------------|------------|------------|------------|------------|------------|------------|------------|------------|
| 0.74       | 0.73       | 0.73       | 0.67       | 0.76       | 0.74       | 0.78       | 0.76       | 0.75       |
| 0.58       | 0.56       | 0.59       | 0.57       | 0.65       | 0.53       | 0.58       | 0.60       | 0.59       |
| 0.54       | 0.53       | 0.50       | 0.50       | 0.57       | 0.47       | 0.50       | 0.55       | 0.47       |
| 0.61       | 0.61       | 0.60       | 0.59       | 0.61       | 0.56       | 0.68       | 0.61       | 0.59       |
| 0.82       | 0.76       | 0.77       | 0.73       | 0.84       | 0.77       | 0.77       | 0.81       | 0.82       |
| 0.73       | 0.73       | 0.73       | 0.68       | 0.75       | 0.71       | 0.70       | 0.75       | 0.72       |
| 0.53       | 0.55       | 0.59       | 0.50       | 0.58       | 0.49       | 0.51       | 0.61       | 0.53       |
| 0.82       | 0.85       | 0.83       | 0.81       | 0.86       | 0.83       | 0.84       | 0.87       | 0.85       |
| 0.72       | 0.75       | 0.75       | 0.70       | 0.78       | 0.79       | 0.77       | 0.78       | 0.78       |
| 0.84       | 0.83       | 0.83       | 0.78       | 0.86       | 0.80       | 0.83       | 0.85       | 0.82       |
| 0.75       | 0.76       | 0.70       | 0.72       | 0.79       | 0.69       | 0.71       | 0.78       | 0.74       |
| 0.82       | 0.89       | 0.87       | 0.82       | 0.85       | 0.86       | 0.88       | 0.87       | 0.86       |
| 0.79       | 0.78       | 0.75       | 0.75       | 0.82       | 0.77       | 0.81       | 0.83       | 0.82       |
| 0.67       | 0.67       | 0.67       | 0.61       | 0.71       | 0.57       | 0.66       | 0.70       | 0.67       |
| 0.86       | 0.87       | 0.84       | 0.84       | 0.87       | 0.82       | 0.87       | 0.86       | 0.86       |
| 0.90       | 0.89       | 0.88       | 0.85       | 0.91       | 0.85       | 0.88       | 0.89       | 0.90       |
| 0.81       | 0.77       | 0.77       | 0.75       | 0.82       | 0.75       | 0.77       | 0.83       | 0.77       |
| 0.72       | 0.68       | 0.66       | 0.69       | 0.69       | 0.61       | 0.65       | 0.70       | 0.67       |
| 0.74       | 0.73       | 0.75       | 0.70       | 0.82       | 0.74       | 0.70       | 0.79       | 0.75       |
| 0.71       | 0.65       | 0.69       | 0.64       | 0.76       | 0.68       | 0.72       | 0.72       | 0.68       |
| 0.60       | 0.58       | 0.56       | 0.55       | 0.72       | 0.61       | 0.66       | 0.64       | 0.65       |
| 0.73       | 0.72       | 0.67       | 0.65       | 0.76       | 0.66       | 0.70       | 0.72       | 0.69       |
| 0.95       | 0.95       | 0.97       | 0.94       | 0.98       | 0.94       | 0.96       | 0.95       | 0.97       |
| 0.85       | 0.85       | 0.84       | 0.82       | 0.88       | 0.85       | 0.85       | 0.90       | 0.87       |
| 0.90       | 0.85       | 0.90       | 0.83       | 0.91       | 0.84       | 0.87       | 0.88       | 0.88       |
| 0.30       | 0.35       | 0.35       | 0.32       | 0.29       | 0.31       | 0.31       | 0.33       | 0.23       |
| 0.62       | 0.61       | 0.53       | 0.51       | 0.69       | 0.58       | 0.65       | 0.65       | 0.62       |
| 0.84       | 0.84       | 0.81       | 0.80       | 0.88       | 0.82       | 0.82       | 0.86       | 0.89       |
| 0.82       | 0.83       | 0.85       | 0.83       | 0.85       | 0.80       | 0.82       | 0.87       | 0.85       |
| 0.80       | 0.82       | 0.81       | 0.81       | 0.89       | 0.76       | 0.81       | 0.82       | 0.82       |
| 0.87       | 0.87       | 0.89       | 0.84       | 0.85       | 0.87       | 0.85       | 0.86       | 0.84       |
| 0.83       | 0.82       | 0.81       | 0.74       | 0.87       | 0.81       | 0.83       | 0.84       | 0.83       |
| 0.95       | 0.92       | 0.94       | 0.95       | 0.97       | 0.93       | 0.94       | 0.96       | 0.95       |
| 0.84       | 0.81       | 0.78       | 0.79       | 0.85       | 0.81       | 0.84       | 0.84       | 0.84       |
| 0.91       | 0.90       | 0.85       | 0.86       | 0.92       | 0.86       | 0.89       | 0.88       | 0.89       |
| 0.80       | 0.85       | 0.79       | 0.78       | 0.86       | 0.72       | 0.77       | 0.76       | 0.83       |
| 0.42       | 0.42       | 0.39       | 0.35       | 0.53       | 0.38       | 0.48       | 0.53       | 0.48       |
| 0.95       | 0.95       | 0.95       | 0.93       | 0.96       | 0.93       | 0.94       | 0.94       | 0.93       |
| 0.70       | 0.60       | 0.73       | 0.68       | 0.79       | 0.65       | 0.56       | 0.71       | 0.66       |
| 0.52       | 0.48       | 0.46       | 0.44       | 0.63       | 0.51       | 0.56       | 0.61       | 0.58       |
| 0.91       | 0.88       | 0.89       | 0.88       | 0.92       | 0.84       | 0.92       | 0.90       | 0.90       |
| 0.85       | 0.87       | 0.82       | 0.83       | 0.90       | 0.78       | 0.85       | 0.89       | 0.85       |

|    |      |      |      |      |      |      |      |      |      |
|----|------|------|------|------|------|------|------|------|------|
| 1  |      |      |      |      |      |      |      |      |      |
| 2  | 0.55 | 0.59 | 0.55 | 0.59 | 0.66 | 0.51 | 0.63 | 0.49 | 0.57 |
| 3  | 0.71 | 0.71 | 0.75 | 0.73 | 0.75 | 0.67 | 0.75 | 0.74 | 0.76 |
| 4  | 0.97 | 0.95 | 0.94 | 0.94 | 0.97 | 0.96 | 0.95 | 0.97 | 0.93 |
| 5  | 0.96 | 0.97 | 0.96 | 0.96 | 0.97 | 0.93 | 0.98 | 0.97 | 0.97 |
| 6  | 0.94 | 0.88 | 0.92 | 0.94 | 0.91 | 0.85 | 0.94 | 0.89 | 0.84 |
| 7  | 0.85 | 0.83 | 0.84 | 0.86 | 0.94 | 0.77 | 0.89 | 0.81 | 0.88 |
| 8  | 0.62 | 0.71 | 0.60 | 0.66 | 0.79 | 0.63 | 0.67 | 0.79 | 0.77 |
| 9  | 0.62 | 0.66 | 0.62 | 0.53 | 0.73 | 0.66 | 0.76 | 0.69 | 0.61 |
| 10 | 0.62 | 0.66 | 0.62 | 0.53 | 0.73 | 0.66 | 0.76 | 0.69 | 0.61 |
| 11 | 0.51 | 0.26 | 0.47 | 0.54 | 0.27 | 0.22 | 0.22 | 0.27 | 0.23 |
| 12 |      |      |      |      |      |      |      |      |      |
| 13 |      |      |      |      |      |      |      |      |      |
| 14 |      |      |      |      |      |      |      |      |      |
| 15 |      |      |      |      |      |      |      |      |      |
| 16 |      |      |      |      |      |      |      |      |      |
| 17 |      |      |      |      |      |      |      |      |      |
| 18 |      |      |      |      |      |      |      |      |      |
| 19 |      |      |      |      |      |      |      |      |      |
| 20 |      |      |      |      |      |      |      |      |      |
| 21 |      |      |      |      |      |      |      |      |      |
| 22 |      |      |      |      |      |      |      |      |      |
| 23 |      |      |      |      |      |      |      |      |      |
| 24 |      |      |      |      |      |      |      |      |      |
| 25 |      |      |      |      |      |      |      |      |      |
| 26 |      |      |      |      |      |      |      |      |      |
| 27 |      |      |      |      |      |      |      |      |      |
| 28 |      |      |      |      |      |      |      |      |      |
| 29 |      |      |      |      |      |      |      |      |      |
| 30 |      |      |      |      |      |      |      |      |      |
| 31 |      |      |      |      |      |      |      |      |      |
| 32 |      |      |      |      |      |      |      |      |      |
| 33 |      |      |      |      |      |      |      |      |      |
| 34 |      |      |      |      |      |      |      |      |      |
| 35 |      |      |      |      |      |      |      |      |      |
| 36 |      |      |      |      |      |      |      |      |      |
| 37 |      |      |      |      |      |      |      |      |      |
| 38 |      |      |      |      |      |      |      |      |      |
| 39 |      |      |      |      |      |      |      |      |      |
| 40 |      |      |      |      |      |      |      |      |      |
| 41 |      |      |      |      |      |      |      |      |      |
| 42 |      |      |      |      |      |      |      |      |      |
| 43 |      |      |      |      |      |      |      |      |      |
| 44 |      |      |      |      |      |      |      |      |      |
| 45 |      |      |      |      |      |      |      |      |      |
| 46 |      |      |      |      |      |      |      |      |      |
| 47 |      |      |      |      |      |      |      |      |      |
| 48 |      |      |      |      |      |      |      |      |      |
| 49 |      |      |      |      |      |      |      |      |      |
| 50 |      |      |      |      |      |      |      |      |      |
| 51 |      |      |      |      |      |      |      |      |      |
| 52 |      |      |      |      |      |      |      |      |      |
| 53 |      |      |      |      |      |      |      |      |      |
| 54 |      |      |      |      |      |      |      |      |      |
| 55 |      |      |      |      |      |      |      |      |      |
| 56 |      |      |      |      |      |      |      |      |      |
| 57 |      |      |      |      |      |      |      |      |      |
| 58 |      |      |      |      |      |      |      |      |      |
| 59 |      |      |      |      |      |      |      |      |      |
| 60 |      |      |      |      |      |      |      |      |      |

For peer review only

1  
2  
3  
4  
5  
6  
7  
8  
9  
10  
11  
12  
13  
14  
15  
16  
17  
18  
19  
20  
21  
22  
23  
24  
25  
26  
27  
28  
29  
30  
31  
32  
33  
34  
35  
36  
37  
38  
39  
40  
41  
42  
43  
44  
45  
46  
47  
48  
49  
50  
51  
52  
53  
54  
55  
56  
57  
58  
59  
60

|  | <b>RWE</b> | <b>RTH</b> | <b>RHQ</b> | <b>RPY</b> |
|--|------------|------------|------------|------------|
|  | 0.68       | 0.73       | 0.74       | 0.71       |
|  | 0.56       | 0.62       | 0.59       | 0.58       |
|  | 0.47       | 0.53       | 0.53       | 0.59       |
|  | 0.57       | 0.57       | 0.61       | 0.63       |
|  | 0.78       | 0.80       | 0.77       | 0.82       |
|  | 0.68       | 0.74       | 0.76       | 0.70       |
|  | 0.50       | 0.58       | 0.57       | 0.53       |
|  | 0.81       | 0.83       | 0.82       | 0.80       |
|  | 0.73       | 0.79       | 0.76       | 0.73       |
|  | 0.81       | 0.83       | 0.85       | 0.79       |
|  | 0.67       | 0.74       | 0.72       | 0.78       |
|  | 0.86       | 0.85       | 0.90       | 0.90       |
|  | 0.76       | 0.79       | 0.78       | 0.80       |
|  | 0.61       | 0.66       | 0.67       | 0.64       |
|  | 0.83       | 0.89       | 0.83       | 0.85       |
|  | 0.85       | 0.90       | 0.87       | 0.92       |
|  | 0.75       | 0.79       | 0.78       | 0.77       |
|  | 0.62       | 0.66       | 0.69       | 0.73       |
|  | 0.72       | 0.75       | 0.77       | 0.80       |
|  | 0.70       | 0.74       | 0.69       | 0.69       |
|  | 0.57       | 0.68       | 0.61       | 0.55       |
|  | 0.66       | 0.70       | 0.69       | 0.72       |
|  | 0.95       | 0.95       | 0.97       | 0.97       |
|  | 0.80       | 0.87       | 0.85       | 0.87       |
|  | 0.83       | 0.88       | 0.88       | 0.90       |
|  | 0.29       | 0.34       | 0.34       | 0.26       |
|  | 0.59       | 0.63       | 0.61       | 0.55       |
|  | 0.81       | 0.85       | 0.83       | 0.89       |
|  | 0.79       | 0.82       | 0.87       | 0.87       |
|  | 0.76       | 0.83       | 0.83       | 0.79       |
|  | 0.84       | 0.89       | 0.87       | 0.88       |
|  | 0.81       | 0.82       | 0.84       | 0.78       |
|  | 0.94       | 0.94       | 0.94       | 0.97       |
|  | 0.77       | 0.83       | 0.82       | 0.85       |
|  | 0.87       | 0.89       | 0.89       | 0.86       |
|  | 0.78       | 0.75       | 0.80       | 0.80       |
|  | 0.44       | 0.44       | 0.46       | 0.39       |
|  | 0.94       | 0.95       | 0.96       | 0.97       |
|  | 0.62       | 0.73       | 0.67       | 0.79       |
|  | 0.51       | 0.54       | 0.56       | 0.48       |
|  | 0.88       | 0.88       | 0.89       | 0.91       |
|  | 0.87       | 0.85       | 0.87       | 0.83       |

|    |      |      |      |      |
|----|------|------|------|------|
| 1  |      |      |      |      |
| 2  | 0.55 | 0.59 | 0.59 | 0.57 |
| 3  | 0.75 | 0.73 | 0.76 | 0.82 |
| 4  | 0.97 | 0.96 | 0.93 | 0.97 |
| 5  | 0.95 | 0.96 | 0.95 | 0.96 |
| 6  | 0.89 | 0.89 | 0.91 | 0.94 |
| 7  | 0.76 | 0.88 | 0.89 | 0.82 |
| 8  | 0.75 | 0.73 | 0.67 | 0.65 |
| 9  | 0.56 | 0.68 | 0.64 | 0.59 |
| 10 | 0.32 | 0.43 | 0.37 | 0.56 |
| 11 |      |      |      |      |
| 12 |      |      |      |      |
| 13 |      |      |      |      |
| 14 |      |      |      |      |
| 15 |      |      |      |      |
| 16 |      |      |      |      |
| 17 |      |      |      |      |
| 18 |      |      |      |      |
| 19 |      |      |      |      |
| 20 |      |      |      |      |
| 21 |      |      |      |      |
| 22 |      |      |      |      |
| 23 |      |      |      |      |
| 24 |      |      |      |      |
| 25 |      |      |      |      |
| 26 |      |      |      |      |
| 27 |      |      |      |      |
| 28 |      |      |      |      |
| 29 |      |      |      |      |
| 30 |      |      |      |      |
| 31 |      |      |      |      |
| 32 |      |      |      |      |
| 33 |      |      |      |      |
| 34 |      |      |      |      |
| 35 |      |      |      |      |
| 36 |      |      |      |      |
| 37 |      |      |      |      |
| 38 |      |      |      |      |
| 39 |      |      |      |      |
| 40 |      |      |      |      |
| 41 |      |      |      |      |
| 42 |      |      |      |      |
| 43 |      |      |      |      |
| 44 |      |      |      |      |
| 45 |      |      |      |      |
| 46 |      |      |      |      |
| 47 |      |      |      |      |
| 48 |      |      |      |      |
| 49 |      |      |      |      |
| 50 |      |      |      |      |
| 51 |      |      |      |      |
| 52 |      |      |      |      |
| 53 |      |      |      |      |
| 54 |      |      |      |      |
| 55 |      |      |      |      |
| 56 |      |      |      |      |
| 57 |      |      |      |      |
| 58 |      |      |      |      |
| 59 |      |      |      |      |
| 60 |      |      |      |      |

For peer review only

**Table 3.** Main central grid: Reliability of hospital scores by question for each of the 146 hospitals included between hospital variance starting with the question with the lowest variance ( Q10 with between hospital variance 0.0151), starting with the hospital with the lowest sample size (RQX with sample size equal to 31). These

**Notes**

- The **between hospital variance** is given in a log-odds scale. These variances are the direct output of the reliability analysis.
- The **sample size** is the number of completed questionnaires received by the corresponding hospital.
- Entries with NA come from hospitals which received less than 21 responses for the corresponding question.

| Between Hospital Variance | Sample Size | 31   | 32   | 53   | 71   | 71   |
|---------------------------|-------------|------|------|------|------|------|
|                           | Hospitals   |      |      |      |      |      |
| Questions                 |             | RQX  | RRJ  | RT3  | RMP  | RPC  |
| 0.0151                    | Q10         | 0.09 | 0.09 | 0.11 | 0.14 | 0.17 |
| 0.0154                    | Q49         | 0.08 | 0.09 | 0.14 | 0.18 | 0.16 |
| 0.0159                    | Q35         | NA   | 0.08 | 0.11 | 0.14 | 0.11 |
| 0.0162                    | Q45         | NA   | NA   | NA   | 0.06 | NA   |
| 0.0168                    | Q26         | 0.06 | 0.08 | 0.11 | 0.11 | 0.14 |
| 0.0178                    | Q13         | 0.10 | 0.11 | 0.15 | 0.18 | 0.19 |
| 0.0182                    | Q15         | 0.11 | 0.11 | 0.13 | 0.21 | 0.19 |
| 0.0198                    | Q9          | 0.09 | 0.09 | 0.11 | 0.08 | 0.14 |
| 0.0200                    | Q1          | 0.07 | 0.09 | 0.12 | 0.18 | 0.11 |
| 0.0207                    | Q12         | 0.11 | 0.06 | 0.13 | 0.11 | 0.15 |
| 0.0216                    | Q30         | NA   | 0.11 | 0.16 | 0.14 | 0.10 |
| 0.0227                    | Q44         | NA   | NA   | NA   | 0.06 | NA   |
| 0.0234                    | Q7          | 0.11 | 0.11 | 0.13 | 0.19 | 0.20 |
| 0.0249                    | Q14         | 0.15 | 0.16 | 0.21 | 0.23 | 0.27 |
| 0.0273                    | Q34         | 0.05 | 0.03 | 0.11 | 0.09 | 0.13 |
| 0.0280                    | Q37         | NA   | 0.05 | 0.11 | 0.11 | 0.11 |
| 0.0280                    | Q16         | 0.14 | 0.14 | 0.20 | 0.20 | 0.26 |
| 0.0293                    | Q48         | NA   | NA   | NA   | NA   | NA   |
| 0.0296                    | Q31         | 0.11 | 0.14 | 0.18 | 0.19 | 0.21 |
| 0.0321                    | Q11         | 0.18 | 0.16 | 0.22 | 0.27 | 0.27 |
| 0.0328                    | Q53         | 0.11 | 0.15 | 0.22 | 0.27 | 0.22 |
| 0.0332                    | Q41         | 0.14 | NA   | 0.16 | 0.22 | 0.24 |
| 0.0337                    | Q25         | 0.10 | 0.06 | 0.09 | 0.03 | 0.09 |
| 0.0349                    | Q29         | NA   | 0.09 | 0.14 | 0.14 | 0.14 |
| 0.0350                    | Q6          | 0.09 | 0.11 | 0.11 | 0.21 | 0.12 |
| 0.0371                    | Q55         | 0.11 | 0.19 | 0.25 | 0.31 | 0.29 |
| 0.0374                    | Q54         | 0.20 | 0.23 | 0.30 | 0.35 | 0.36 |
| 0.0383                    | Q36         | 0.11 | 0.15 | 0.12 | 0.10 | 0.15 |
| 0.0387                    | Q47         | NA   | NA   | NA   | 0.09 | NA   |
| 0.0395                    | Q21         | 0.19 | 0.15 | 0.14 | 0.21 | 0.17 |
| 0.0414                    | Q38         | NA   | 0.12 | 0.20 | 0.16 | 0.16 |
| 0.0439                    | Q2          | 0.13 | 0.24 | 0.21 | 0.24 | 0.29 |
| 0.0475                    | Q5          | 0.00 | 0.04 | 0.08 | 0.08 | 0.18 |
| 0.0483                    | Q28         | NA   | 0.14 | 0.30 | 0.23 | 0.30 |

|    |        |            |      |      |      |      |      |  |
|----|--------|------------|------|------|------|------|------|--|
| 1  |        |            |      |      |      |      |      |  |
| 2  | 0.0497 | <b>Q19</b> | NA   | NA   | 0.09 | 0.16 | 0.23 |  |
| 3  | 0.0532 | <b>Q23</b> | NA   | NA   | NA   | 0.19 | 0.17 |  |
| 4  | 0.0564 | <b>Q51</b> | NA   | NA   | NA   | 0.28 | NA   |  |
| 5  | 0.0607 | <b>Q39</b> | NA   | 0.20 | 0.10 | 0.10 | 0.18 |  |
| 6  | 0.0615 | <b>Q32</b> | NA   | 0.20 | 0.34 | 0.43 | 0.35 |  |
| 7  | 0.0727 | <b>Q50</b> | NA   | 0.29 | 0.28 | 0.48 | 0.34 |  |
| 8  | 0.0740 | <b>Q56</b> | 0.24 | 0.21 | 0.12 | 0.29 | 0.32 |  |
| 9  | 0.0778 | <b>Q18</b> | NA   | 0.07 | 0.25 | 0.26 | 0.32 |  |
| 10 | 0.0793 | <b>Q22</b> | NA   | NA   | 0.34 | 0.37 | 0.32 |  |
| 11 | 0.0836 | <b>Q8</b>  | 0.28 | 0.31 | 0.40 | 0.47 | 0.53 |  |
| 12 | 0.0849 | <b>Q52</b> | 0.22 | 0.14 | 0.31 | 0.00 | 0.19 |  |
| 13 | 0.0881 | <b>Q42</b> | 0.14 | 0.00 | 0.08 | 0.15 | 0.29 |  |
| 14 | 0.0936 | <b>Q17</b> | 0.35 | 0.20 | 0.21 | 0.15 | 0.48 |  |
| 15 | 0.1046 | <b>Q20</b> | NA   | 0.26 | 0.31 | 0.36 | 0.45 |  |
| 16 | 0.1084 | <b>Q33</b> | 0.35 | 0.38 | 0.54 | 0.57 | 0.54 |  |
| 17 | 0.1341 | <b>Q57</b> | 0.49 | 0.51 | 0.44 | 0.70 | 0.57 |  |
| 18 | 0.1930 | <b>Q58</b> | 0.54 | 0.47 | 0.62 | 0.72 | 0.60 |  |
| 19 |        |            |      |      |      |      |      |  |
| 20 |        |            |      |      |      |      |      |  |
| 21 |        |            |      |      |      |      |      |  |
| 22 |        |            |      |      |      |      |      |  |
| 23 |        |            |      |      |      |      |      |  |
| 24 |        |            |      |      |      |      |      |  |
| 25 |        |            |      |      |      |      |      |  |
| 26 |        |            |      |      |      |      |      |  |
| 27 |        |            |      |      |      |      |      |  |
| 28 |        |            |      |      |      |      |      |  |
| 29 |        |            |      |      |      |      |      |  |
| 30 |        |            |      |      |      |      |      |  |
| 31 |        |            |      |      |      |      |      |  |
| 32 |        |            |      |      |      |      |      |  |
| 33 |        |            |      |      |      |      |      |  |
| 34 |        |            |      |      |      |      |      |  |
| 35 |        |            |      |      |      |      |      |  |
| 36 |        |            |      |      |      |      |      |  |
| 37 |        |            |      |      |      |      |      |  |
| 38 |        |            |      |      |      |      |      |  |
| 39 |        |            |      |      |      |      |      |  |
| 40 |        |            |      |      |      |      |      |  |
| 41 |        |            |      |      |      |      |      |  |
| 42 |        |            |      |      |      |      |      |  |
| 43 |        |            |      |      |      |      |      |  |
| 44 |        |            |      |      |      |      |      |  |
| 45 |        |            |      |      |      |      |      |  |
| 46 |        |            |      |      |      |      |      |  |
| 47 |        |            |      |      |      |      |      |  |
| 48 |        |            |      |      |      |      |      |  |
| 49 |        |            |      |      |      |      |      |  |
| 50 |        |            |      |      |      |      |      |  |
| 51 |        |            |      |      |      |      |      |  |
| 52 |        |            |      |      |      |      |      |  |
| 53 |        |            |      |      |      |      |      |  |
| 54 |        |            |      |      |      |      |      |  |
| 55 |        |            |      |      |      |      |      |  |
| 56 |        |            |      |      |      |      |      |  |
| 57 |        |            |      |      |      |      |      |  |
| 58 |        |            |      |      |      |      |      |  |
| 59 |        |            |      |      |      |      |      |  |
| 60 |        |            |      |      |      |      |      |  |

included in the analysis (CPES 2016). The questions are ordered according to their hospital variance equal to 0.0151). The hospitals are ordered according to their sample values correspond to the cells in Figure 3.

of each of the 51 fitted logisted regression models.  
al.  
; question.

|  | 73   | 74   | 76   | 102  | 108  | 111  | 112  | 115  | 122  |
|--|------|------|------|------|------|------|------|------|------|
|  | REP  | RAN  | RGM  | RBQ  | R1F  | RKE  | RE9  | RJ6  | RVY  |
|  | 0.17 | 0.18 | 0.12 | 0.18 | 0.23 | 0.27 | 0.26 | 0.28 | 0.26 |
|  | 0.20 | 0.19 | 0.18 | 0.23 | 0.24 | 0.24 | 0.24 | 0.23 | 0.25 |
|  | 0.16 | 0.14 | 0.11 | 0.19 | 0.16 | 0.16 | 0.14 | 0.16 | 0.12 |
|  | NA   |
|  | 0.13 | 0.15 | 0.11 | 0.17 | 0.16 | 0.14 | 0.15 | 0.14 | 0.13 |
|  | 0.20 | 0.21 | 0.15 | 0.22 | 0.28 | 0.29 | 0.27 | 0.25 | 0.29 |
|  | 0.23 | 0.21 | 0.20 | 0.27 | 0.29 | 0.30 | 0.30 | 0.31 | 0.31 |
|  | 0.18 | 0.19 | 0.05 | 0.23 | 0.20 | 0.20 | 0.16 | 0.20 | 0.28 |
|  | 0.16 | 0.21 | 0.13 | 0.24 | 0.21 | 0.24 | 0.22 | 0.24 | 0.23 |
|  | 0.10 | 0.13 | 0.07 | 0.18 | 0.26 | 0.23 | 0.23 | 0.19 | 0.24 |
|  | 0.15 | 0.21 | 0.11 | 0.22 | 0.20 | 0.14 | 0.19 | 0.23 | 0.17 |
|  | NA   | NA   | NA   | NA   | NA   | 0.07 | NA   | 0.04 | NA   |
|  | 0.14 | 0.25 | 0.14 | 0.27 | 0.27 | 0.26 | 0.30 | 0.29 | 0.22 |
|  | 0.26 | 0.28 | 0.26 | 0.34 | 0.38 | 0.34 | 0.32 | 0.36 | 0.40 |
|  | 0.05 | 0.09 | 0.09 | 0.23 | 0.28 | 0.11 | 0.14 | 0.19 | 0.19 |
|  | 0.13 | 0.18 | 0.07 | 0.18 | 0.21 | 0.09 | 0.11 | 0.20 | 0.16 |
|  | 0.26 | 0.27 | 0.12 | 0.30 | 0.37 | 0.35 | 0.34 | 0.36 | 0.32 |
|  | NA   | NA   | NA   | 0.13 | 0.16 | 0.24 | 0.23 | 0.17 | 0.20 |
|  | 0.24 | 0.28 | 0.23 | 0.24 | 0.29 | 0.22 | 0.25 | 0.31 | 0.24 |
|  | 0.32 | 0.31 | 0.25 | 0.39 | 0.40 | 0.39 | 0.37 | 0.39 | 0.36 |
|  | 0.28 | 0.31 | 0.28 | 0.37 | 0.36 | 0.36 | 0.40 | 0.37 | 0.40 |
|  | 0.21 | 0.26 | 0.25 | 0.32 | 0.34 | 0.34 | 0.34 | 0.34 | 0.34 |
|  | 0.03 | 0.15 | 0.00 | 0.00 | 0.09 | 0.03 | 0.13 | 0.14 | 0.09 |
|  | 0.12 | 0.20 | 0.09 | 0.28 | 0.22 | 0.21 | 0.24 | 0.26 | 0.16 |
|  | 0.18 | 0.34 | 0.16 | 0.23 | 0.30 | 0.22 | 0.14 | 0.26 | 0.24 |
|  | 0.31 | 0.27 | 0.36 | 0.40 | 0.44 | 0.42 | 0.43 | 0.41 | 0.40 |
|  | 0.39 | 0.40 | 0.34 | 0.47 | 0.49 | 0.45 | 0.45 | 0.47 | 0.51 |
|  | 0.17 | 0.24 | 0.07 | 0.25 | 0.21 | 0.12 | 0.22 | 0.24 | 0.21 |
|  | NA   | NA   | NA   | NA   | 0.14 | 0.21 | 0.10 | 0.15 | 0.26 |
|  | 0.13 | 0.23 | 0.13 | 0.36 | 0.35 | 0.29 | 0.24 | 0.23 | 0.32 |
|  | 0.11 | 0.26 | 0.10 | 0.19 | 0.26 | 0.16 | 0.28 | 0.26 | 0.28 |
|  | 0.33 | 0.44 | 0.14 | 0.36 | 0.40 | 0.36 | 0.33 | 0.40 | 0.41 |
|  | 0.08 | 0.18 | 0.12 | 0.21 | 0.28 | 0.26 | 0.12 | 0.32 | 0.18 |
|  | 0.23 | 0.36 | 0.25 | 0.47 | 0.39 | 0.27 | 0.31 | 0.40 | 0.23 |

|    |      |      |      |      |      |      |      |      |      |
|----|------|------|------|------|------|------|------|------|------|
| 1  |      |      |      |      |      |      |      |      |      |
| 2  | 0.23 | 0.28 | 0.09 | 0.36 | 0.30 | 0.27 | 0.24 | 0.16 | 0.16 |
| 3  | 0.15 | 0.28 | 0.17 | 0.25 | 0.23 | 0.17 | 0.26 | 0.33 | 0.32 |
| 4  | 0.20 | 0.35 | 0.23 | 0.44 | 0.33 | 0.33 | 0.32 | 0.31 | 0.33 |
| 5  | 0.11 | 0.22 | 0.10 | 0.30 | 0.28 | 0.10 | 0.10 | 0.28 | 0.32 |
| 6  | 0.40 | 0.41 | 0.33 | 0.45 | 0.52 | 0.43 | 0.43 | 0.50 | 0.43 |
| 7  | 0.40 | 0.49 | 0.38 | 0.58 | 0.53 | 0.52 | 0.52 | 0.50 | 0.51 |
| 8  | 0.26 | 0.44 | 0.18 | 0.29 | 0.50 | 0.26 | 0.26 | 0.40 | 0.36 |
| 9  | 0.22 | 0.44 | 0.30 | 0.36 | 0.48 | 0.41 | 0.23 | 0.13 | 0.49 |
| 10 | 0.22 | 0.44 | 0.30 | 0.36 | 0.48 | 0.41 | 0.23 | 0.13 | 0.49 |
| 11 | 0.36 | 0.43 | 0.41 | 0.53 | 0.53 | 0.42 | 0.57 | 0.49 | 0.51 |
| 12 | 0.55 | 0.53 | 0.40 | 0.58 | 0.62 | 0.59 | 0.43 | 0.58 | 0.66 |
| 13 | 0.19 | 0.28 | 0.20 | 0.29 | 0.32 | 0.32 | 0.08 | 0.29 | 0.20 |
| 14 | 0.00 | 0.20 | 0.08 | 0.20 | 0.29 | 0.25 | 0.20 | 0.20 | 0.00 |
| 15 | 0.21 | 0.42 | 0.37 | 0.46 | 0.46 | 0.21 | 0.26 | 0.50 | 0.58 |
| 16 | 0.21 | 0.42 | 0.37 | 0.46 | 0.46 | 0.21 | 0.26 | 0.50 | 0.58 |
| 17 | 0.23 | 0.46 | 0.28 | 0.60 | 0.58 | 0.29 | 0.52 | 0.45 | 0.58 |
| 18 | 0.54 | 0.62 | 0.45 | 0.65 | 0.67 | 0.56 | 0.52 | 0.67 | 0.52 |
| 19 | 0.69 | 0.70 | 0.63 | 0.74 | 0.71 | 0.76 | 0.69 | 0.76 | 0.77 |
| 20 | 0.73 | 0.77 | 0.77 | 0.81 | 0.56 | 0.82 | 0.79 | 0.79 | 0.69 |
| 21 |      |      |      |      |      |      |      |      |      |
| 22 |      |      |      |      |      |      |      |      |      |
| 23 |      |      |      |      |      |      |      |      |      |
| 24 |      |      |      |      |      |      |      |      |      |
| 25 |      |      |      |      |      |      |      |      |      |
| 26 |      |      |      |      |      |      |      |      |      |
| 27 |      |      |      |      |      |      |      |      |      |
| 28 |      |      |      |      |      |      |      |      |      |
| 29 |      |      |      |      |      |      |      |      |      |
| 30 |      |      |      |      |      |      |      |      |      |
| 31 |      |      |      |      |      |      |      |      |      |
| 32 |      |      |      |      |      |      |      |      |      |
| 33 |      |      |      |      |      |      |      |      |      |
| 34 |      |      |      |      |      |      |      |      |      |
| 35 |      |      |      |      |      |      |      |      |      |
| 36 |      |      |      |      |      |      |      |      |      |
| 37 |      |      |      |      |      |      |      |      |      |
| 38 |      |      |      |      |      |      |      |      |      |
| 39 |      |      |      |      |      |      |      |      |      |
| 40 |      |      |      |      |      |      |      |      |      |
| 41 |      |      |      |      |      |      |      |      |      |
| 42 |      |      |      |      |      |      |      |      |      |
| 43 |      |      |      |      |      |      |      |      |      |
| 44 |      |      |      |      |      |      |      |      |      |
| 45 |      |      |      |      |      |      |      |      |      |
| 46 |      |      |      |      |      |      |      |      |      |
| 47 |      |      |      |      |      |      |      |      |      |
| 48 |      |      |      |      |      |      |      |      |      |
| 49 |      |      |      |      |      |      |      |      |      |
| 50 |      |      |      |      |      |      |      |      |      |
| 51 |      |      |      |      |      |      |      |      |      |
| 52 |      |      |      |      |      |      |      |      |      |
| 53 |      |      |      |      |      |      |      |      |      |
| 54 |      |      |      |      |      |      |      |      |      |
| 55 |      |      |      |      |      |      |      |      |      |
| 56 |      |      |      |      |      |      |      |      |      |
| 57 |      |      |      |      |      |      |      |      |      |
| 58 |      |      |      |      |      |      |      |      |      |
| 59 |      |      |      |      |      |      |      |      |      |
| 60 |      |      |      |      |      |      |      |      |      |



1  
2  
3  
4  
5  
6  
7  
8  
9  
10  
11  
12  
13  
14  
15  
16  
17 133 136 138 141 147 151 152 158 170  
18  
19

|    | RA4  | RJN  | RAS  | RFR  | RAX  | RWW  | RM3  | RQM  | RVR  |
|----|------|------|------|------|------|------|------|------|------|
| 20 |      |      |      |      |      |      |      |      |      |
| 21 |      |      |      |      |      |      |      |      |      |
| 22 |      |      |      |      |      |      |      |      |      |
| 23 | 0.25 | 0.27 | 0.29 | 0.23 | 0.33 | 0.32 | 0.31 | 0.33 | 0.37 |
| 24 | 0.27 | 0.26 | 0.30 | 0.30 | 0.30 | 0.30 | 0.30 | 0.30 | 0.31 |
| 25 | 0.16 | 0.14 | 0.19 | 0.19 | 0.20 | 0.20 | 0.24 | 0.20 | 0.18 |
| 26 | NA   | 0.11 | 0.09 | 0.07 | NA   | 0.09 | 0.10 | 0.11 | NA   |
| 27 | 0.19 | 0.17 | 0.18 | 0.12 | 0.17 | 0.19 | 0.18 | 0.19 | 0.16 |
| 28 | 0.30 | 0.34 | 0.33 | 0.30 | 0.35 | 0.36 | 0.28 | 0.36 | 0.37 |
| 29 | 0.34 | 0.35 | 0.35 | 0.34 | 0.33 | 0.37 | 0.37 | 0.38 | 0.39 |
| 30 | 0.24 | 0.21 | 0.22 | 0.20 | 0.26 | 0.28 | 0.22 | 0.29 | 0.32 |
| 31 | 0.21 | 0.22 | 0.28 | 0.21 | 0.29 | 0.23 | 0.27 | 0.28 | 0.35 |
| 32 | 0.25 | 0.26 | 0.23 | 0.19 | 0.28 | 0.29 | 0.21 | 0.33 | 0.30 |
| 33 | 0.17 | 0.17 | 0.25 | 0.17 | 0.25 | 0.25 | 0.25 | 0.22 | 0.25 |
| 34 | 0.04 | 0.07 | 0.09 | 0.06 | NA   | 0.11 | 0.07 | 0.07 | NA   |
| 35 | 0.34 | 0.21 | 0.34 | 0.31 | 0.34 | 0.36 | 0.27 | 0.34 | 0.36 |
| 36 | 0.36 | 0.41 | 0.40 | 0.39 | 0.45 | 0.45 | 0.41 | 0.46 | 0.46 |
| 37 | 0.22 | 0.20 | 0.21 | 0.17 | 0.24 | 0.27 | 0.26 | 0.24 | 0.18 |
| 38 | 0.15 | 0.16 | 0.21 | 0.17 | 0.23 | 0.20 | 0.26 | 0.31 | 0.22 |
| 39 | 0.31 | 0.31 | 0.39 | 0.36 | 0.38 | 0.46 | 0.33 | 0.47 | 0.42 |
| 40 | 0.25 | 0.27 | 0.26 | 0.28 | 0.25 | 0.21 | 0.13 | 0.30 | 0.23 |
| 41 | 0.31 | 0.22 | 0.35 | 0.24 | 0.35 | 0.31 | 0.41 | 0.37 | 0.35 |
| 42 | 0.42 | 0.37 | 0.41 | 0.38 | 0.44 | 0.48 | 0.41 | 0.50 | 0.48 |
| 43 | 0.38 | 0.43 | 0.40 | 0.37 | 0.42 | 0.43 | 0.46 | 0.44 | 0.41 |
| 44 | 0.34 | 0.41 | 0.42 | 0.38 | 0.40 | 0.43 | 0.34 | 0.46 | 0.39 |
| 45 | 0.06 | 0.16 | 0.09 | 0.03 | 0.09 | 0.14 | 0.14 | 0.18 | 0.15 |
| 46 | 0.30 | 0.16 | 0.27 | 0.18 | 0.33 | 0.27 | 0.27 | 0.25 | 0.25 |
| 47 | 0.30 | 0.19 | 0.31 | 0.26 | 0.24 | 0.43 | 0.29 | 0.32 | 0.39 |
| 48 | 0.44 | 0.47 | 0.49 | 0.51 | 0.43 | 0.49 | 0.51 | 0.49 | 0.51 |
| 49 | 0.50 | 0.51 | 0.54 | 0.50 | 0.54 | 0.56 | 0.55 | 0.57 | 0.58 |
| 50 | 0.24 | 0.19 | 0.26 | 0.20 | 0.32 | 0.32 | 0.24 | 0.30 | 0.23 |
| 51 | 0.17 | 0.23 | 0.15 | 0.17 | 0.30 | 0.25 | 0.07 | 0.29 | 0.17 |
| 52 | 0.30 | 0.22 | 0.34 | 0.24 | 0.33 | 0.40 | 0.26 | 0.37 | 0.27 |
| 53 | 0.35 | 0.18 | 0.33 | 0.21 | 0.32 | 0.33 | 0.27 | 0.32 | 0.16 |
| 54 | 0.32 | 0.37 | 0.50 | 0.38 | 0.42 | 0.55 | 0.42 | 0.51 | 0.43 |
| 55 | 0.12 | 0.18 | 0.32 | 0.16 | 0.32 | 0.37 | 0.26 | 0.34 | 0.19 |
| 56 | 0.31 | 0.27 | 0.42 | 0.35 | 0.35 | 0.40 | 0.42 | 0.40 | 0.35 |

|    |      |      |      |      |      |      |      |      |      |
|----|------|------|------|------|------|------|------|------|------|
| 1  |      |      |      |      |      |      |      |      |      |
| 2  | 0.19 | 0.22 | 0.33 | 0.22 | 0.24 | 0.33 | 0.27 | 0.36 | 0.33 |
| 3  | 0.30 | 0.35 | 0.37 | 0.22 | 0.35 | 0.38 | 0.31 | 0.37 | 0.24 |
| 4  | 0.27 | 0.32 | 0.35 | 0.41 | 0.32 | 0.34 | 0.46 | 0.38 | 0.33 |
| 5  | 0.25 | 0.06 | 0.33 | 0.06 | 0.22 | 0.31 | 0.26 | 0.33 | 0.19 |
| 6  | 0.53 | 0.38 | 0.54 | 0.49 | 0.56 | 0.54 | 0.61 | 0.52 | 0.52 |
| 7  | 0.43 | 0.56 | 0.53 | 0.59 | 0.50 | 0.61 | 0.61 | 0.57 | 0.53 |
| 8  | 0.46 | 0.46 | 0.45 | 0.45 | 0.55 | 0.57 | 0.41 | 0.50 | 0.47 |
| 9  | 0.43 | 0.31 | 0.34 | 0.42 | 0.43 | 0.47 | 0.57 | 0.49 | 0.46 |
| 10 | 0.54 | 0.49 | 0.56 | 0.60 | 0.47 | 0.59 | 0.62 | 0.57 | 0.50 |
| 11 | 0.59 | 0.64 | 0.70 | 0.62 | 0.71 | 0.70 | 0.66 | 0.73 | 0.69 |
| 12 | 0.25 | 0.20 | 0.25 | 0.39 | 0.44 | 0.39 | 0.25 | 0.42 | 0.25 |
| 13 | 0.15 | 0.25 | 0.20 | 0.30 | 0.25 | 0.37 | 0.15 | 0.43 | 0.21 |
| 14 | 0.55 | 0.38 | 0.60 | 0.16 | 0.52 | 0.62 | 0.44 | 0.65 | 0.51 |
| 15 | 0.52 | 0.52 | 0.62 | 0.54 | 0.61 | 0.65 | 0.61 | 0.59 | 0.49 |
| 16 | 0.64 | 0.59 | 0.64 | 0.65 | 0.72 | 0.67 | 0.68 | 0.70 | 0.67 |
| 17 | 0.70 | 0.78 | 0.80 | 0.78 | 0.76 | 0.78 | 0.78 | 0.82 | 0.83 |
| 18 | 0.82 | 0.82 | 0.82 | 0.84 | 0.76 | 0.72 | 0.86 | 0.83 | 0.86 |
| 19 |      |      |      |      |      |      |      |      |      |
| 20 |      |      |      |      |      |      |      |      |      |
| 21 |      |      |      |      |      |      |      |      |      |
| 22 |      |      |      |      |      |      |      |      |      |
| 23 |      |      |      |      |      |      |      |      |      |
| 24 |      |      |      |      |      |      |      |      |      |
| 25 |      |      |      |      |      |      |      |      |      |
| 26 |      |      |      |      |      |      |      |      |      |
| 27 |      |      |      |      |      |      |      |      |      |
| 28 |      |      |      |      |      |      |      |      |      |
| 29 |      |      |      |      |      |      |      |      |      |
| 30 |      |      |      |      |      |      |      |      |      |
| 31 |      |      |      |      |      |      |      |      |      |
| 32 |      |      |      |      |      |      |      |      |      |
| 33 |      |      |      |      |      |      |      |      |      |
| 34 |      |      |      |      |      |      |      |      |      |
| 35 |      |      |      |      |      |      |      |      |      |
| 36 |      |      |      |      |      |      |      |      |      |
| 37 |      |      |      |      |      |      |      |      |      |
| 38 |      |      |      |      |      |      |      |      |      |
| 39 |      |      |      |      |      |      |      |      |      |
| 40 |      |      |      |      |      |      |      |      |      |
| 41 |      |      |      |      |      |      |      |      |      |
| 42 |      |      |      |      |      |      |      |      |      |
| 43 |      |      |      |      |      |      |      |      |      |
| 44 |      |      |      |      |      |      |      |      |      |
| 45 |      |      |      |      |      |      |      |      |      |
| 46 |      |      |      |      |      |      |      |      |      |
| 47 |      |      |      |      |      |      |      |      |      |
| 48 |      |      |      |      |      |      |      |      |      |
| 49 |      |      |      |      |      |      |      |      |      |
| 50 |      |      |      |      |      |      |      |      |      |
| 51 |      |      |      |      |      |      |      |      |      |
| 52 |      |      |      |      |      |      |      |      |      |
| 53 |      |      |      |      |      |      |      |      |      |
| 54 |      |      |      |      |      |      |      |      |      |
| 55 |      |      |      |      |      |      |      |      |      |
| 56 |      |      |      |      |      |      |      |      |      |
| 57 |      |      |      |      |      |      |      |      |      |
| 58 |      |      |      |      |      |      |      |      |      |
| 59 |      |      |      |      |      |      |      |      |      |
| 60 |      |      |      |      |      |      |      |      |      |

1  
2  
3  
4  
5  
6  
7  
8  
9  
10  
11  
12  
13  
14  
15  
16  
17 175 189 192 193 200 210 210 211 216  
18  
19

|    | RJR  | RC1  | RFF  | RJ2  | RA3  | RBT  | REN  | RRF  | RAP  |
|----|------|------|------|------|------|------|------|------|------|
| 20 |      |      |      |      |      |      |      |      |      |
| 21 |      |      |      |      |      |      |      |      |      |
| 22 |      |      |      |      |      |      |      |      |      |
| 23 | 0.35 | 0.32 | 0.35 | 0.39 | 0.38 | 0.39 | 0.38 | 0.40 | 0.42 |
| 24 | 0.31 | 0.34 | 0.35 | 0.38 | 0.36 | 0.38 | 0.39 | 0.37 | 0.41 |
| 25 | 0.19 | 0.25 | 0.25 | 0.25 | 0.18 | 0.23 | 0.25 | 0.24 | 0.24 |
| 26 | 0.09 | 0.12 | 0.09 | 0.11 | NA   | 0.07 | 0.35 | 0.08 | 0.24 |
| 27 | 0.19 | 0.27 | 0.20 | 0.24 | 0.20 | 0.24 | 0.12 | 0.25 | 0.25 |
| 28 | 0.36 | 0.36 | 0.36 | 0.40 | 0.42 | 0.41 | 0.43 | 0.40 | 0.46 |
| 29 | 0.40 | 0.41 | 0.40 | 0.45 | 0.45 | 0.45 | 0.46 | 0.44 | 0.46 |
| 30 | 0.29 | 0.33 | 0.24 | 0.33 | 0.38 | 0.32 | 0.36 | 0.35 | 0.42 |
| 31 | 0.29 | 0.33 | 0.32 | 0.36 | 0.38 | 0.31 | 0.36 | 0.29 | 0.36 |
| 32 | 0.30 | 0.32 | 0.30 | 0.36 | 0.38 | 0.34 | 0.29 | 0.37 | 0.42 |
| 33 | 0.24 | 0.30 | 0.25 | 0.25 | 0.27 | 0.30 | 0.27 | 0.28 | 0.31 |
| 34 | 0.09 | 0.12 | 0.04 | 0.09 | 0.06 | 0.08 | 0.29 | 0.04 | 0.19 |
| 35 | 0.27 | 0.37 | 0.36 | 0.41 | 0.42 | 0.42 | 0.39 | 0.41 | 0.47 |
| 36 | 0.46 | 0.49 | 0.48 | 0.52 | 0.52 | 0.51 | 0.53 | 0.53 | 0.55 |
| 37 | 0.18 | 0.31 | 0.24 | 0.30 | 0.24 | 0.23 | 0.23 | 0.26 | 0.34 |
| 38 | 0.14 | 0.29 | 0.17 | 0.31 | 0.20 | 0.25 | 0.17 | 0.26 | 0.35 |
| 39 | 0.37 | 0.45 | 0.42 | 0.47 | 0.52 | 0.44 | 0.48 | 0.49 | 0.57 |
| 40 | 0.25 | 0.27 | 0.29 | 0.41 | 0.39 | 0.26 | 0.37 | 0.31 | 0.49 |
| 41 | 0.33 | 0.41 | 0.29 | 0.39 | 0.32 | 0.37 | 0.36 | 0.32 | 0.44 |
| 42 | 0.44 | 0.51 | 0.50 | 0.50 | 0.53 | 0.54 | 0.53 | 0.52 | 0.57 |
| 43 | 0.47 | 0.51 | 0.47 | 0.52 | 0.49 | 0.46 | 0.53 | 0.49 | 0.56 |
| 44 | 0.44 | 0.50 | 0.41 | 0.50 | 0.51 | 0.49 | 0.54 | 0.51 | 0.57 |
| 45 | 0.03 | 0.16 | 0.00 | 0.11 | 0.16 | 0.03 | 0.06 | 0.12 | 0.11 |
| 46 | 0.24 | 0.38 | 0.24 | 0.37 | 0.29 | 0.37 | 0.34 | 0.29 | 0.45 |
| 47 | 0.33 | 0.41 | 0.28 | 0.39 | 0.42 | 0.35 | 0.39 | 0.30 | 0.44 |
| 48 | 0.55 | 0.54 | 0.56 | 0.52 | 0.52 | 0.55 | 0.59 | 0.61 | 0.60 |
| 49 | 0.60 | 0.61 | 0.59 | 0.63 | 0.63 | 0.60 | 0.62 | 0.63 | 0.65 |
| 50 | 0.30 | 0.42 | 0.27 | 0.30 | 0.27 | 0.33 | 0.37 | 0.35 | 0.41 |
| 51 | 0.15 | 0.19 | 0.24 | 0.37 | 0.33 | 0.25 | 0.35 | 0.28 | 0.53 |
| 52 | 0.24 | 0.45 | 0.36 | 0.46 | 0.40 | 0.45 | 0.42 | 0.40 | 0.53 |
| 53 | 0.27 | 0.45 | 0.25 | 0.36 | 0.31 | 0.33 | 0.36 | 0.40 | 0.42 |
| 54 | 0.48 | 0.55 | 0.50 | 0.55 | 0.56 | 0.48 | 0.51 | 0.47 | 0.60 |
| 55 | 0.19 | 0.24 | 0.29 | 0.38 | 0.39 | 0.31 | 0.27 | 0.41 | 0.36 |
| 56 | 0.33 | 0.52 | 0.34 | 0.49 | 0.42 | 0.44 | 0.43 | 0.42 | 0.54 |

|    |      |      |      |      |      |      |      |      |      |
|----|------|------|------|------|------|------|------|------|------|
| 1  |      |      |      |      |      |      |      |      |      |
| 2  | 0.37 | 0.44 | 0.40 | 0.45 | 0.35 | 0.43 | 0.42 | 0.41 | 0.56 |
| 3  | 0.24 | 0.42 | 0.28 | 0.44 | 0.33 | 0.38 | 0.42 | 0.35 | 0.50 |
| 4  | 0.38 | 0.36 | 0.49 | 0.46 | 0.39 | 0.47 | 0.58 | 0.47 | 0.48 |
| 5  | 0.06 | 0.44 | 0.19 | 0.15 | 0.25 | 0.15 | 0.22 | 0.31 | 0.41 |
| 6  | 0.55 | 0.64 | 0.55 | 0.61 | 0.55 | 0.62 | 0.58 | 0.60 | 0.61 |
| 7  | 0.56 | 0.59 | 0.65 | 0.65 | 0.55 | 0.65 | 0.67 | 0.68 | 0.70 |
| 8  | 0.59 | 0.58 | 0.47 | 0.59 | 0.61 | 0.56 | 0.49 | 0.57 | 0.68 |
| 9  | 0.49 | 0.56 | 0.46 | 0.62 | 0.55 | 0.57 | 0.46 | 0.56 | 0.63 |
| 10 | 0.54 | 0.61 | 0.67 | 0.69 | 0.63 | 0.65 | 0.69 | 0.68 | 0.73 |
| 11 | 0.66 | 0.74 | 0.74 | 0.75 | 0.73 | 0.75 | 0.75 | 0.65 | 0.77 |
| 12 | 0.25 | 0.20 | 0.36 | 0.52 | 0.20 | 0.47 | 0.42 | 0.33 | 0.58 |
| 13 | 0.26 | 0.15 | 0.34 | 0.43 | 0.30 | 0.37 | 0.40 | 0.40 | 0.55 |
| 14 | 0.57 | 0.67 | 0.61 | 0.44 | 0.63 | 0.55 | 0.67 | 0.60 | 0.61 |
| 15 | 0.44 | 0.67 | 0.58 | 0.66 | 0.69 | 0.67 | 0.60 | 0.65 | 0.70 |
| 16 | 0.67 | 0.76 | 0.73 | 0.72 | 0.65 | 0.67 | 0.73 | 0.68 | 0.73 |
| 17 | 0.82 | 0.85 | 0.79 | 0.84 | 0.84 | 0.84 | 0.84 | 0.77 | 0.88 |
| 18 | 0.84 | 0.79 | 0.84 | 0.84 | 0.87 | 0.83 | 0.86 | 0.84 | 0.88 |
| 19 |      |      |      |      |      |      |      |      |      |
| 20 |      |      |      |      |      |      |      |      |      |
| 21 |      |      |      |      |      |      |      |      |      |
| 22 |      |      |      |      |      |      |      |      |      |
| 23 |      |      |      |      |      |      |      |      |      |
| 24 |      |      |      |      |      |      |      |      |      |
| 25 |      |      |      |      |      |      |      |      |      |
| 26 |      |      |      |      |      |      |      |      |      |
| 27 |      |      |      |      |      |      |      |      |      |
| 28 |      |      |      |      |      |      |      |      |      |
| 29 |      |      |      |      |      |      |      |      |      |
| 30 |      |      |      |      |      |      |      |      |      |
| 31 |      |      |      |      |      |      |      |      |      |
| 32 |      |      |      |      |      |      |      |      |      |
| 33 |      |      |      |      |      |      |      |      |      |
| 34 |      |      |      |      |      |      |      |      |      |
| 35 |      |      |      |      |      |      |      |      |      |
| 36 |      |      |      |      |      |      |      |      |      |
| 37 |      |      |      |      |      |      |      |      |      |
| 38 |      |      |      |      |      |      |      |      |      |
| 39 |      |      |      |      |      |      |      |      |      |
| 40 |      |      |      |      |      |      |      |      |      |
| 41 |      |      |      |      |      |      |      |      |      |
| 42 |      |      |      |      |      |      |      |      |      |
| 43 |      |      |      |      |      |      |      |      |      |
| 44 |      |      |      |      |      |      |      |      |      |
| 45 |      |      |      |      |      |      |      |      |      |
| 46 |      |      |      |      |      |      |      |      |      |
| 47 |      |      |      |      |      |      |      |      |      |
| 48 |      |      |      |      |      |      |      |      |      |
| 49 |      |      |      |      |      |      |      |      |      |
| 50 |      |      |      |      |      |      |      |      |      |
| 51 |      |      |      |      |      |      |      |      |      |
| 52 |      |      |      |      |      |      |      |      |      |
| 53 |      |      |      |      |      |      |      |      |      |
| 54 |      |      |      |      |      |      |      |      |      |
| 55 |      |      |      |      |      |      |      |      |      |
| 56 |      |      |      |      |      |      |      |      |      |
| 57 |      |      |      |      |      |      |      |      |      |
| 58 |      |      |      |      |      |      |      |      |      |
| 59 |      |      |      |      |      |      |      |      |      |
| 60 |      |      |      |      |      |      |      |      |      |

1  
2  
3  
4  
5  
6  
7  
8  
9  
10  
11  
12  
13  
14  
15  
16  
17 219 221 241 245 250 251 252 252 259  
18  
19

|    | RMC  | RLQ  | RLT  | RDZ  | RBK  | RQQ  | RBN  | RDD  | RFS  |
|----|------|------|------|------|------|------|------|------|------|
| 20 |      |      |      |      |      |      |      |      |      |
| 21 |      |      |      |      |      |      |      |      |      |
| 22 |      |      |      |      |      |      |      |      |      |
| 23 | 0.33 | 0.37 | 0.40 | 0.35 | 0.41 | 0.43 | 0.37 | 0.44 | 0.46 |
| 24 | 0.37 | 0.38 | 0.41 | 0.37 | 0.43 | 0.43 | 0.39 | 0.42 | 0.43 |
| 25 | 0.25 | 0.21 | 0.26 | 0.33 | 0.33 | 0.24 | 0.32 | 0.30 | 0.31 |
| 26 | 0.12 | 0.14 | 0.18 | 0.15 | 0.15 | 0.10 | 0.03 | 0.11 | 0.13 |
| 27 | 0.25 | 0.25 | 0.24 | 0.33 | 0.29 | 0.23 | 0.30 | 0.25 | 0.28 |
| 28 | 0.38 | 0.41 | 0.43 | 0.43 | 0.47 | 0.48 | 0.42 | 0.47 | 0.47 |
| 29 | 0.42 | 0.45 | 0.49 | 0.47 | 0.51 | 0.50 | 0.45 | 0.50 | 0.49 |
| 30 | 0.23 | 0.31 | 0.41 | 0.29 | 0.43 | 0.42 | 0.29 | 0.40 | 0.38 |
| 31 | 0.30 | 0.31 | 0.43 | 0.29 | 0.36 | 0.44 | 0.30 | 0.36 | 0.33 |
| 32 | 0.21 | 0.32 | 0.35 | 0.36 | 0.42 | 0.41 | 0.37 | 0.41 | 0.42 |
| 33 | 0.27 | 0.29 | 0.25 | 0.31 | 0.36 | 0.31 | 0.37 | 0.36 | 0.35 |
| 34 | 0.08 | 0.13 | 0.19 | 0.15 | 0.17 | 0.16 | 0.02 | 0.09 | 0.04 |
| 35 | 0.38 | 0.34 | 0.44 | 0.45 | 0.51 | 0.44 | 0.41 | 0.46 | 0.45 |
| 36 | 0.50 | 0.54 | 0.55 | 0.52 | 0.58 | 0.57 | 0.56 | 0.58 | 0.56 |
| 37 | 0.23 | 0.32 | 0.30 | 0.35 | 0.39 | 0.28 | 0.27 | 0.34 | 0.32 |
| 38 | 0.25 | 0.31 | 0.33 | 0.28 | 0.37 | 0.22 | 0.30 | 0.36 | 0.31 |
| 39 | 0.41 | 0.48 | 0.51 | 0.49 | 0.57 | 0.52 | 0.50 | 0.54 | 0.52 |
| 40 | 0.27 | 0.31 | 0.38 | 0.35 | 0.47 | 0.43 | 0.28 | 0.42 | 0.38 |
| 41 | 0.38 | 0.39 | 0.43 | 0.48 | 0.50 | 0.40 | 0.51 | 0.47 | 0.47 |
| 42 | 0.45 | 0.53 | 0.56 | 0.54 | 0.59 | 0.57 | 0.57 | 0.58 | 0.59 |
| 43 | 0.49 | 0.49 | 0.56 | 0.53 | 0.57 | 0.58 | 0.54 | 0.55 | 0.52 |
| 44 | 0.45 | 0.51 | 0.50 | 0.48 | 0.58 | 0.56 | 0.54 | 0.57 | 0.55 |
| 45 | 0.09 | 0.18 | 0.09 | 0.16 | 0.14 | 0.20 | 0.09 | 0.12 | 0.22 |
| 46 | 0.28 | 0.34 | 0.37 | 0.32 | 0.46 | 0.33 | 0.30 | 0.45 | 0.42 |
| 47 | 0.33 | 0.35 | 0.42 | 0.37 | 0.48 | 0.43 | 0.38 | 0.44 | 0.39 |
| 48 | 0.53 | 0.57 | 0.61 | 0.62 | 0.62 | 0.58 | 0.61 | 0.61 | 0.62 |
| 49 | 0.61 | 0.64 | 0.66 | 0.62 | 0.68 | 0.67 | 0.66 | 0.68 | 0.66 |
| 50 | 0.32 | 0.32 | 0.36 | 0.43 | 0.50 | 0.35 | 0.41 | 0.32 | 0.43 |
| 51 | 0.20 | 0.27 | 0.28 | 0.36 | 0.51 | 0.47 | 0.19 | 0.33 | 0.28 |
| 52 | 0.38 | 0.48 | 0.46 | 0.44 | 0.49 | 0.53 | 0.38 | 0.50 | 0.44 |
| 53 | 0.31 | 0.34 | 0.35 | 0.36 | 0.45 | 0.39 | 0.41 | 0.44 | 0.44 |
| 54 | 0.38 | 0.53 | 0.57 | 0.47 | 0.61 | 0.52 | 0.48 | 0.56 | 0.53 |
| 55 | 0.37 | 0.24 | 0.33 | 0.35 | 0.38 | 0.40 | 0.40 | 0.38 | 0.38 |
| 56 | 0.48 | 0.47 | 0.51 | 0.40 | 0.56 | 0.52 | 0.45 | 0.56 | 0.54 |

|    |      |      |      |      |      |      |      |      |      |
|----|------|------|------|------|------|------|------|------|------|
| 1  |      |      |      |      |      |      |      |      |      |
| 2  | 0.30 | 0.35 | 0.34 | 0.30 | 0.53 | 0.45 | 0.32 | 0.47 | 0.44 |
| 3  | 0.38 | 0.45 | 0.33 | 0.37 | 0.51 | 0.45 | 0.41 | 0.46 | 0.49 |
| 4  | 0.47 | 0.44 | 0.47 | 0.50 | 0.46 | 0.51 | 0.52 | 0.54 | 0.55 |
| 5  | 0.31 | 0.35 | 0.36 | 0.26 | 0.34 | 0.26 | 0.29 | 0.46 | 0.31 |
| 6  | 0.62 | 0.52 | 0.64 | 0.67 | 0.68 | 0.61 | 0.66 | 0.67 | 0.68 |
| 7  | 0.66 | 0.67 | 0.65 | 0.69 | 0.68 | 0.71 | 0.70 | 0.70 | 0.73 |
| 8  | 0.41 | 0.57 | 0.46 | 0.51 | 0.69 | 0.62 | 0.60 | 0.49 | 0.55 |
| 9  | 0.42 | 0.58 | 0.49 | 0.53 | 0.66 | 0.49 | 0.52 | 0.63 | 0.51 |
| 10 | 0.66 | 0.66 | 0.71 | 0.66 | 0.74 | 0.72 | 0.69 | 0.70 | 0.69 |
| 11 | 0.65 | 0.77 | 0.79 | 0.65 | 0.79 | 0.79 | 0.79 | 0.79 | 0.79 |
| 12 | 0.33 | 0.42 | 0.29 | 0.29 | 0.52 | 0.42 | 0.36 | 0.49 | 0.39 |
| 13 | 0.21 | 0.34 | 0.30 | 0.21 | 0.57 | 0.40 | 0.26 | 0.43 | 0.40 |
| 14 | 0.56 | 0.66 | 0.61 | 0.58 | 0.68 | 0.68 | 0.67 | 0.66 | 0.76 |
| 15 | 0.59 | 0.69 | 0.68 | 0.63 | 0.75 | 0.73 | 0.57 | 0.76 | 0.69 |
| 16 | 0.74 | 0.69 | 0.74 | 0.79 | 0.78 | 0.76 | 0.81 | 0.79 | 0.77 |
| 17 | 0.82 | 0.85 | 0.85 | 0.85 | 0.88 | 0.86 | 0.83 | 0.84 | 0.88 |
| 18 | 0.84 | 0.89 | 0.90 | 0.87 | 0.90 | 0.89 | 0.82 | 0.84 | 0.88 |
| 19 |      |      |      |      |      |      |      |      |      |
| 20 |      |      |      |      |      |      |      |      |      |
| 21 |      |      |      |      |      |      |      |      |      |
| 22 |      |      |      |      |      |      |      |      |      |
| 23 |      |      |      |      |      |      |      |      |      |
| 24 |      |      |      |      |      |      |      |      |      |
| 25 |      |      |      |      |      |      |      |      |      |
| 26 |      |      |      |      |      |      |      |      |      |
| 27 |      |      |      |      |      |      |      |      |      |
| 28 |      |      |      |      |      |      |      |      |      |
| 29 |      |      |      |      |      |      |      |      |      |
| 30 |      |      |      |      |      |      |      |      |      |
| 31 |      |      |      |      |      |      |      |      |      |
| 32 |      |      |      |      |      |      |      |      |      |
| 33 |      |      |      |      |      |      |      |      |      |
| 34 |      |      |      |      |      |      |      |      |      |
| 35 |      |      |      |      |      |      |      |      |      |
| 36 |      |      |      |      |      |      |      |      |      |
| 37 |      |      |      |      |      |      |      |      |      |
| 38 |      |      |      |      |      |      |      |      |      |
| 39 |      |      |      |      |      |      |      |      |      |
| 40 |      |      |      |      |      |      |      |      |      |
| 41 |      |      |      |      |      |      |      |      |      |
| 42 |      |      |      |      |      |      |      |      |      |
| 43 |      |      |      |      |      |      |      |      |      |
| 44 |      |      |      |      |      |      |      |      |      |
| 45 |      |      |      |      |      |      |      |      |      |
| 46 |      |      |      |      |      |      |      |      |      |
| 47 |      |      |      |      |      |      |      |      |      |
| 48 |      |      |      |      |      |      |      |      |      |
| 49 |      |      |      |      |      |      |      |      |      |
| 50 |      |      |      |      |      |      |      |      |      |
| 51 |      |      |      |      |      |      |      |      |      |
| 52 |      |      |      |      |      |      |      |      |      |
| 53 |      |      |      |      |      |      |      |      |      |
| 54 |      |      |      |      |      |      |      |      |      |
| 55 |      |      |      |      |      |      |      |      |      |
| 56 |      |      |      |      |      |      |      |      |      |
| 57 |      |      |      |      |      |      |      |      |      |
| 58 |      |      |      |      |      |      |      |      |      |
| 59 |      |      |      |      |      |      |      |      |      |
| 60 |      |      |      |      |      |      |      |      |      |

1  
2  
3  
4  
5  
6  
7  
8  
9  
10  
11  
12  
13  
14  
15  
16  
17  
18  
19  
20  
21  
22  
23  
24  
25  
26  
27  
28  
29  
30  
31  
32  
33  
34  
35  
36  
37  
38  
39  
40  
41  
42  
43  
44  
45  
46  
47  
48  
49  
50  
51  
52  
53  
54  
55  
56  
57  
58  
59  
60

261 277 277 279 279 287 288 288 294

| RTK  | RCF  | RWG  | REM  | RJF  | RQW  | RCB  | RF4  | RK5  |
|------|------|------|------|------|------|------|------|------|
| 0.46 | 0.45 | 0.44 | 0.46 | 0.45 | 0.44 | 0.44 | 0.44 | 0.50 |
| 0.44 | 0.45 | 0.44 | 0.46 | 0.46 | 0.46 | 0.46 | 0.45 | 0.47 |
| 0.27 | 0.31 | 0.32 | 0.36 | 0.34 | 0.32 | 0.39 | 0.35 | 0.38 |
| 0.08 | 0.14 | 0.12 | 0.22 | 0.14 | 0.14 | 0.14 | 0.32 | 0.12 |
| 0.29 | 0.28 | 0.34 | 0.34 | 0.30 | 0.28 | 0.35 | 0.34 | 0.39 |
| 0.49 | 0.49 | 0.48 | 0.50 | 0.50 | 0.51 | 0.48 | 0.50 | 0.52 |
| 0.51 | 0.51 | 0.50 | 0.54 | 0.53 | 0.52 | 0.52 | 0.54 | 0.53 |
| 0.41 | 0.44 | 0.43 | 0.42 | 0.39 | 0.43 | 0.35 | 0.40 | 0.48 |
| 0.36 | 0.42 | 0.35 | 0.36 | 0.44 | 0.41 | 0.41 | 0.36 | 0.41 |
| 0.43 | 0.41 | 0.43 | 0.38 | 0.43 | 0.43 | 0.37 | 0.44 | 0.49 |
| 0.37 | 0.38 | 0.42 | 0.39 | 0.43 | 0.40 | 0.42 | 0.38 | 0.41 |
| 0.06 | 0.09 | 0.10 | 0.23 | 0.08 | 0.19 | 0.12 | 0.33 | 0.15 |
| 0.47 | 0.51 | 0.48 | 0.47 | 0.51 | 0.47 | 0.46 | 0.51 | 0.57 |
| 0.59 | 0.60 | 0.59 | 0.60 | 0.60 | 0.61 | 0.55 | 0.60 | 0.62 |
| 0.28 | 0.29 | 0.39 | 0.34 | 0.33 | 0.38 | 0.45 | 0.38 | 0.38 |
| 0.30 | 0.39 | 0.35 | 0.38 | 0.34 | 0.35 | 0.40 | 0.39 | 0.35 |
| 0.60 | 0.57 | 0.56 | 0.57 | 0.58 | 0.55 | 0.54 | 0.61 | 0.62 |
| 0.36 | 0.50 | 0.29 | 0.36 | 0.49 | 0.44 | 0.44 | 0.47 | 0.40 |
| 0.46 | 0.52 | 0.51 | 0.52 | 0.49 | 0.51 | 0.57 | 0.55 | 0.50 |
| 0.60 | 0.56 | 0.60 | 0.63 | 0.62 | 0.62 | 0.58 | 0.60 | 0.64 |
| 0.56 | 0.53 | 0.58 | 0.58 | 0.61 | 0.58 | 0.58 | 0.58 | 0.61 |
| 0.55 | 0.58 | 0.53 | 0.60 | 0.56 | 0.61 | 0.57 | 0.61 | 0.61 |
| 0.12 | 0.18 | 0.12 | 0.26 | 0.09 | 0.14 | 0.16 | 0.16 | 0.28 |
| 0.43 | 0.42 | 0.42 | 0.40 | 0.47 | 0.46 | 0.44 | 0.45 | 0.47 |
| 0.43 | 0.43 | 0.50 | 0.38 | 0.49 | 0.43 | 0.34 | 0.55 | 0.54 |
| 0.62 | 0.64 | 0.62 | 0.62 | 0.61 | 0.64 | 0.66 | 0.65 | 0.63 |
| 0.68 | 0.70 | 0.70 | 0.68 | 0.70 | 0.72 | 0.71 | 0.71 | 0.71 |
| 0.39 | 0.48 | 0.48 | 0.50 | 0.43 | 0.45 | 0.52 | 0.48 | 0.50 |
| 0.39 | 0.51 | 0.31 | 0.33 | 0.43 | 0.45 | 0.39 | 0.45 | 0.37 |
| 0.52 | 0.50 | 0.51 | 0.57 | 0.53 | 0.53 | 0.48 | 0.57 | 0.58 |
| 0.43 | 0.43 | 0.46 | 0.49 | 0.49 | 0.46 | 0.48 | 0.49 | 0.55 |
| 0.60 | 0.52 | 0.62 | 0.59 | 0.61 | 0.61 | 0.59 | 0.65 | 0.54 |
| 0.27 | 0.31 | 0.43 | 0.43 | 0.39 | 0.40 | 0.39 | 0.49 | 0.43 |
| 0.48 | 0.46 | 0.59 | 0.51 | 0.52 | 0.63 | 0.56 | 0.60 | 0.58 |

|    |      |      |      |      |      |      |      |      |      |
|----|------|------|------|------|------|------|------|------|------|
| 1  |      |      |      |      |      |      |      |      |      |
| 2  | 0.51 | 0.44 | 0.41 | 0.50 | 0.46 | 0.52 | 0.45 | 0.59 | 0.58 |
| 3  | 0.45 | 0.49 | 0.43 | 0.38 | 0.58 | 0.53 | 0.45 | 0.58 | 0.53 |
| 4  | 0.49 | 0.57 | 0.54 | 0.59 | 0.52 | 0.49 | 0.54 | 0.54 | 0.45 |
| 5  | 0.48 | 0.38 | 0.44 | 0.39 | 0.36 | 0.48 | 0.19 | 0.40 | 0.41 |
| 6  | 0.66 | 0.71 | 0.72 | 0.74 | 0.70 | 0.72 | 0.77 | 0.72 | 0.74 |
| 7  | 0.67 | 0.73 | 0.71 | 0.74 | 0.73 | 0.73 | 0.71 | 0.73 | 0.70 |
| 8  | 0.64 | 0.61 | 0.69 | 0.62 | 0.59 | 0.64 | 0.62 | 0.63 | 0.70 |
| 9  | 0.63 | 0.52 | 0.62 | 0.62 | 0.67 | 0.69 | 0.66 | 0.70 | 0.69 |
| 10 | 0.68 | 0.71 | 0.69 | 0.76 | 0.75 | 0.73 | 0.70 | 0.76 | 0.74 |
| 11 | 0.81 | 0.78 | 0.81 | 0.80 | 0.77 | 0.82 | 0.81 | 0.82 | 0.80 |
| 12 | 0.33 | 0.29 | 0.42 | 0.51 | 0.37 | 0.53 | 0.25 | 0.63 | 0.45 |
| 13 | 0.48 | 0.30 | 0.52 | 0.37 | 0.43 | 0.57 | 0.43 | 0.41 | 0.37 |
| 14 | 0.70 | 0.74 | 0.69 | 0.70 | 0.67 | 0.66 | 0.66 | 0.61 | 0.75 |
| 15 | 0.76 | 0.73 | 0.67 | 0.77 | 0.79 | 0.77 | 0.71 | 0.81 | 0.81 |
| 16 | 0.76 | 0.78 | 0.81 | 0.82 | 0.79 | 0.81 | 0.84 | 0.83 | 0.77 |
| 17 | 0.86 | 0.90 | 0.89 | 0.89 | 0.90 | 0.89 | 0.87 | 0.89 | 0.90 |
| 18 | 0.87 | 0.91 | 0.84 | 0.89 | 0.91 | 0.91 | 0.91 | 0.90 | 0.89 |
| 19 |      |      |      |      |      |      |      |      |      |
| 20 |      |      |      |      |      |      |      |      |      |
| 21 |      |      |      |      |      |      |      |      |      |
| 22 |      |      |      |      |      |      |      |      |      |
| 23 |      |      |      |      |      |      |      |      |      |
| 24 |      |      |      |      |      |      |      |      |      |
| 25 |      |      |      |      |      |      |      |      |      |
| 26 |      |      |      |      |      |      |      |      |      |
| 27 |      |      |      |      |      |      |      |      |      |
| 28 |      |      |      |      |      |      |      |      |      |
| 29 |      |      |      |      |      |      |      |      |      |
| 30 |      |      |      |      |      |      |      |      |      |
| 31 |      |      |      |      |      |      |      |      |      |
| 32 |      |      |      |      |      |      |      |      |      |
| 33 |      |      |      |      |      |      |      |      |      |
| 34 |      |      |      |      |      |      |      |      |      |
| 35 |      |      |      |      |      |      |      |      |      |
| 36 |      |      |      |      |      |      |      |      |      |
| 37 |      |      |      |      |      |      |      |      |      |
| 38 |      |      |      |      |      |      |      |      |      |
| 39 |      |      |      |      |      |      |      |      |      |
| 40 |      |      |      |      |      |      |      |      |      |
| 41 |      |      |      |      |      |      |      |      |      |
| 42 |      |      |      |      |      |      |      |      |      |
| 43 |      |      |      |      |      |      |      |      |      |
| 44 |      |      |      |      |      |      |      |      |      |
| 45 |      |      |      |      |      |      |      |      |      |
| 46 |      |      |      |      |      |      |      |      |      |
| 47 |      |      |      |      |      |      |      |      |      |
| 48 |      |      |      |      |      |      |      |      |      |
| 49 |      |      |      |      |      |      |      |      |      |
| 50 |      |      |      |      |      |      |      |      |      |
| 51 |      |      |      |      |      |      |      |      |      |
| 52 |      |      |      |      |      |      |      |      |      |
| 53 |      |      |      |      |      |      |      |      |      |
| 54 |      |      |      |      |      |      |      |      |      |
| 55 |      |      |      |      |      |      |      |      |      |
| 56 |      |      |      |      |      |      |      |      |      |
| 57 |      |      |      |      |      |      |      |      |      |
| 58 |      |      |      |      |      |      |      |      |      |
| 59 |      |      |      |      |      |      |      |      |      |
| 60 |      |      |      |      |      |      |      |      |      |



1  
2  
3  
4  
5  
6  
7  
8  
9  
10  
11  
12  
13  
14  
15  
16  
17 298 299 308 309 313 313 320 324 327  
18  
19

|    | RCD  | RBZ  | RTP  | RWJ  | RC9  | RGP  | RD8  | RBD  | RNQ  |
|----|------|------|------|------|------|------|------|------|------|
| 20 |      |      |      |      |      |      |      |      |      |
| 21 |      |      |      |      |      |      |      |      |      |
| 22 | 0.44 | 0.47 | 0.47 | 0.46 | 0.47 | 0.48 | 0.52 | 0.47 | 0.47 |
| 23 | 0.45 | 0.46 | 0.47 | 0.47 | 0.48 | 0.48 | 0.49 | 0.49 | 0.50 |
| 24 | 0.30 | 0.32 | 0.27 | 0.40 | 0.32 | 0.34 | 0.33 | 0.32 | 0.36 |
| 25 | 0.16 | 0.15 | 0.22 | 0.15 | 0.17 | 0.14 | 0.13 | 0.12 | 0.21 |
| 26 | 0.27 | 0.32 | 0.34 | 0.35 | 0.31 | 0.32 | 0.35 | 0.31 | 0.28 |
| 27 | 0.48 | 0.49 | 0.51 | 0.52 | 0.50 | 0.53 | 0.54 | 0.53 | 0.52 |
| 28 | 0.52 | 0.54 | 0.55 | 0.54 | 0.55 | 0.55 | 0.57 | 0.55 | 0.57 |
| 29 | 0.35 | 0.42 | 0.48 | 0.46 | 0.40 | 0.48 | 0.48 | 0.44 | 0.43 |
| 30 | 0.38 | 0.47 | 0.39 | 0.48 | 0.43 | 0.47 | 0.43 | 0.45 | 0.42 |
| 31 | 0.40 | 0.46 | 0.42 | 0.46 | 0.42 | 0.48 | 0.49 | 0.46 | 0.45 |
| 32 | 0.28 | 0.39 | 0.36 | 0.43 | 0.38 | 0.39 | 0.39 | 0.35 | 0.38 |
| 33 | 0.16 | 0.16 | 0.14 | 0.12 | 0.09 | 0.15 | 0.13 | 0.13 | 0.22 |
| 34 | 0.44 | 0.46 | 0.53 | 0.49 | 0.48 | 0.52 | 0.57 | 0.46 | 0.54 |
| 35 | 0.56 | 0.60 | 0.63 | 0.62 | 0.62 | 0.62 | 0.64 | 0.62 | 0.63 |
| 36 | 0.30 | 0.31 | 0.30 | 0.49 | 0.35 | 0.35 | 0.36 | 0.36 | 0.36 |
| 37 | 0.32 | 0.26 | 0.19 | 0.41 | 0.35 | 0.35 | 0.39 | 0.29 | 0.29 |
| 38 | 0.51 | 0.56 | 0.58 | 0.61 | 0.57 | 0.60 | 0.63 | 0.58 | 0.63 |
| 39 | 0.38 | 0.50 | 0.47 | 0.25 | 0.45 | 0.48 | 0.57 | 0.44 | 0.51 |
| 40 | 0.48 | 0.43 | 0.49 | 0.57 | 0.51 | 0.49 | 0.54 | 0.43 | 0.53 |
| 41 | 0.47 | 0.58 | 0.61 | 0.60 | 0.64 | 0.63 | 0.67 | 0.64 | 0.63 |
| 42 | 0.60 | 0.62 | 0.61 | 0.61 | 0.61 | 0.61 | 0.64 | 0.62 | 0.62 |
| 43 | 0.50 | 0.56 | 0.61 | 0.56 | 0.60 | 0.59 | 0.64 | 0.60 | 0.64 |
| 44 | 0.06 | 0.18 | 0.16 | 0.22 | 0.18 | 0.14 | 0.33 | 0.14 | 0.14 |
| 45 | 0.39 | 0.42 | 0.40 | 0.52 | 0.43 | 0.47 | 0.47 | 0.44 | 0.44 |
| 46 | 0.38 | 0.38 | 0.51 | 0.41 | 0.52 | 0.53 | 0.51 | 0.44 | 0.58 |
| 47 | 0.66 | 0.62 | 0.64 | 0.65 | 0.69 | 0.66 | 0.64 | 0.66 | 0.66 |
| 48 | 0.69 | 0.69 | 0.72 | 0.72 | 0.73 | 0.72 | 0.74 | 0.73 | 0.74 |
| 49 | 0.41 | 0.39 | 0.42 | 0.50 | 0.46 | 0.43 | 0.46 | 0.41 | 0.43 |
| 50 | 0.31 | 0.46 | 0.40 | 0.25 | 0.32 | 0.48 | 0.54 | 0.41 | 0.43 |
| 51 | 0.34 | 0.52 | 0.56 | 0.56 | 0.52 | 0.57 | 0.59 | 0.54 | 0.59 |
| 52 | 0.33 | 0.47 | 0.36 | 0.50 | 0.45 | 0.53 | 0.52 | 0.47 | 0.47 |
| 53 | 0.53 | 0.59 | 0.65 | 0.59 | 0.64 | 0.65 | 0.66 | 0.65 | 0.68 |
| 54 | 0.33 | 0.19 | 0.39 | 0.33 | 0.35 | 0.46 | 0.47 | 0.22 | 0.43 |
| 55 | 0.47 | 0.59 | 0.47 | 0.63 | 0.60 | 0.62 | 0.61 | 0.54 | 0.61 |

|    |      |      |      |      |      |      |      |      |      |
|----|------|------|------|------|------|------|------|------|------|
| 1  |      |      |      |      |      |      |      |      |      |
| 2  | 0.46 | 0.49 | 0.61 | 0.52 | 0.60 | 0.47 | 0.56 | 0.48 | 0.61 |
| 3  | 0.33 | 0.45 | 0.44 | 0.47 | 0.49 | 0.49 | 0.64 | 0.57 | 0.54 |
| 4  | 0.53 | 0.55 | 0.49 | 0.60 | 0.63 | 0.55 | 0.52 | 0.58 | 0.53 |
| 5  | 0.26 | 0.32 | 0.31 | 0.46 | 0.40 | 0.36 | 0.45 | 0.19 | 0.47 |
| 6  | 0.66 | 0.70 | 0.66 | 0.76 | 0.71 | 0.73 | 0.73 | 0.69 | 0.73 |
| 7  | 0.71 | 0.70 | 0.73 | 0.75 | 0.75 | 0.74 | 0.70 | 0.75 | 0.73 |
| 8  | 0.34 | 0.51 | 0.73 | 0.67 | 0.64 | 0.60 | 0.73 | 0.69 | 0.77 |
| 9  | 0.56 | 0.45 | 0.73 | 0.70 | 0.70 | 0.52 | 0.72 | 0.62 | 0.76 |
| 10 | 0.59 | 0.71 | 0.72 | 0.71 | 0.74 | 0.77 | 0.76 | 0.76 | 0.76 |
| 11 | 0.80 | 0.80 | 0.73 | 0.84 | 0.81 | 0.83 | 0.83 | 0.82 | 0.83 |
| 12 | 0.37 | 0.37 | 0.40 | 0.53 | 0.49 | 0.54 | 0.51 | 0.59 | 0.60 |
| 13 | 0.15 | 0.37 | 0.48 | 0.48 | 0.60 | 0.52 | 0.50 | 0.43 | 0.69 |
| 14 | 0.47 | 0.67 | 0.68 | 0.66 | 0.45 | 0.74 | 0.79 | 0.70 | 0.74 |
| 15 | 0.63 | 0.75 | 0.65 | 0.78 | 0.75 | 0.75 | 0.81 | 0.70 | 0.84 |
| 16 | 0.72 | 0.70 | 0.80 | 0.85 | 0.82 | 0.81 | 0.82 | 0.78 | 0.79 |
| 17 | 0.84 | 0.89 | 0.90 | 0.88 | 0.90 | 0.88 | 0.90 | 0.88 | 0.91 |
| 18 | 0.91 | 0.91 | 0.91 | 0.88 | 0.91 | 0.85 | 0.92 | 0.91 | 0.89 |
| 19 |      |      |      |      |      |      |      |      |      |
| 20 |      |      |      |      |      |      |      |      |      |
| 21 |      |      |      |      |      |      |      |      |      |
| 22 |      |      |      |      |      |      |      |      |      |
| 23 |      |      |      |      |      |      |      |      |      |
| 24 |      |      |      |      |      |      |      |      |      |
| 25 |      |      |      |      |      |      |      |      |      |
| 26 |      |      |      |      |      |      |      |      |      |
| 27 |      |      |      |      |      |      |      |      |      |
| 28 |      |      |      |      |      |      |      |      |      |
| 29 |      |      |      |      |      |      |      |      |      |
| 30 |      |      |      |      |      |      |      |      |      |
| 31 |      |      |      |      |      |      |      |      |      |
| 32 |      |      |      |      |      |      |      |      |      |
| 33 |      |      |      |      |      |      |      |      |      |
| 34 |      |      |      |      |      |      |      |      |      |
| 35 |      |      |      |      |      |      |      |      |      |
| 36 |      |      |      |      |      |      |      |      |      |
| 37 |      |      |      |      |      |      |      |      |      |
| 38 |      |      |      |      |      |      |      |      |      |
| 39 |      |      |      |      |      |      |      |      |      |
| 40 |      |      |      |      |      |      |      |      |      |
| 41 |      |      |      |      |      |      |      |      |      |
| 42 |      |      |      |      |      |      |      |      |      |
| 43 |      |      |      |      |      |      |      |      |      |
| 44 |      |      |      |      |      |      |      |      |      |
| 45 |      |      |      |      |      |      |      |      |      |
| 46 |      |      |      |      |      |      |      |      |      |
| 47 |      |      |      |      |      |      |      |      |      |
| 48 |      |      |      |      |      |      |      |      |      |
| 49 |      |      |      |      |      |      |      |      |      |
| 50 |      |      |      |      |      |      |      |      |      |
| 51 |      |      |      |      |      |      |      |      |      |
| 52 |      |      |      |      |      |      |      |      |      |
| 53 |      |      |      |      |      |      |      |      |      |
| 54 |      |      |      |      |      |      |      |      |      |
| 55 |      |      |      |      |      |      |      |      |      |
| 56 |      |      |      |      |      |      |      |      |      |
| 57 |      |      |      |      |      |      |      |      |      |
| 58 |      |      |      |      |      |      |      |      |      |
| 59 |      |      |      |      |      |      |      |      |      |
| 60 |      |      |      |      |      |      |      |      |      |

1  
2  
3  
4  
5  
6  
7  
8  
9  
10  
11  
12  
13  
14  
15  
16  
17 344 350 350 352 374 384 387 395 396  
18  
19

|    | RP5  | RVJ  | RW3  | RJC  | RAE  | RBL  | RGR  | RQ6  | R1K  |
|----|------|------|------|------|------|------|------|------|------|
| 20 |      |      |      |      |      |      |      |      |      |
| 21 |      |      |      |      |      |      |      |      |      |
| 22 |      |      |      |      |      |      |      |      |      |
| 23 | 0.50 | 0.46 | 0.53 | 0.47 | 0.54 | 0.52 | 0.53 | 0.55 | 0.54 |
| 24 | 0.51 | 0.52 | 0.52 | 0.50 | 0.53 | 0.51 | 0.52 | 0.54 | 0.53 |
| 25 | 0.37 | 0.41 | 0.41 | 0.33 | 0.44 | 0.40 | 0.37 | 0.41 | 0.40 |
| 26 | 0.15 | 0.25 | 0.13 | 0.19 | 0.17 | 0.24 | 0.20 | 0.26 | 0.19 |
| 27 | 0.33 | 0.47 | 0.35 | 0.26 | 0.44 | 0.36 | 0.32 | 0.31 | 0.40 |
| 28 | 0.56 | 0.55 | 0.53 | 0.52 | 0.58 | 0.55 | 0.56 | 0.55 | 0.59 |
| 29 | 0.57 | 0.58 | 0.56 | 0.59 | 0.60 | 0.58 | 0.60 | 0.61 | 0.61 |
| 30 | 0.46 | 0.44 | 0.45 | 0.46 | 0.52 | 0.49 | 0.51 | 0.47 | 0.47 |
| 31 | 0.47 | 0.47 | 0.52 | 0.43 | 0.47 | 0.48 | 0.45 | 0.52 | 0.53 |
| 32 | 0.49 | 0.47 | 0.45 | 0.45 | 0.49 | 0.50 | 0.45 | 0.48 | 0.54 |
| 33 | 0.43 | 0.45 | 0.43 | 0.32 | 0.52 | 0.43 | 0.42 | 0.43 | 0.45 |
| 34 | 0.16 | 0.24 | 0.11 | 0.17 | 0.11 | 0.22 | 0.16 | 0.24 | 0.16 |
| 35 | 0.55 | 0.54 | 0.50 | 0.49 | 0.59 | 0.52 | 0.54 | 0.47 | 0.58 |
| 36 | 0.65 | 0.66 | 0.64 | 0.65 | 0.68 | 0.66 | 0.67 | 0.66 | 0.67 |
| 37 | 0.41 | 0.28 | 0.42 | 0.35 | 0.56 | 0.44 | 0.41 | 0.41 | 0.43 |
| 38 | 0.43 | 0.42 | 0.47 | 0.25 | 0.52 | 0.38 | 0.33 | 0.39 | 0.39 |
| 39 | 0.64 | 0.57 | 0.59 | 0.60 | 0.67 | 0.64 | 0.62 | 0.63 | 0.68 |
| 40 | 0.43 | 0.32 | 0.40 | 0.53 | 0.50 | 0.42 | 0.53 | 0.35 | 0.54 |
| 41 | 0.54 | 0.57 | 0.60 | 0.48 | 0.63 | 0.56 | 0.52 | 0.54 | 0.54 |
| 42 | 0.66 | 0.65 | 0.65 | 0.64 | 0.70 | 0.68 | 0.67 | 0.69 | 0.68 |
| 43 | 0.63 | 0.65 | 0.64 | 0.59 | 0.65 | 0.65 | 0.65 | 0.65 | 0.67 |
| 44 | 0.62 | 0.62 | 0.62 | 0.63 | 0.68 | 0.66 | 0.66 | 0.65 | 0.67 |
| 45 | 0.16 | 0.28 | 0.12 | 0.18 | 0.31 | 0.16 | 0.28 | 0.16 | 0.29 |
| 46 | 0.54 | 0.51 | 0.54 | 0.43 | 0.62 | 0.47 | 0.41 | 0.38 | 0.50 |
| 47 | 0.53 | 0.59 | 0.49 | 0.48 | 0.52 | 0.59 | 0.58 | 0.54 | 0.59 |
| 48 | 0.67 | 0.71 | 0.69 | 0.70 | 0.70 | 0.70 | 0.71 | 0.73 | 0.71 |
| 49 | 0.75 | 0.74 | 0.75 | 0.73 | 0.77 | 0.75 | 0.74 | 0.76 | 0.77 |
| 50 | 0.50 | 0.54 | 0.52 | 0.26 | 0.61 | 0.54 | 0.40 | 0.42 | 0.50 |
| 51 | 0.48 | 0.32 | 0.34 | 0.46 | 0.48 | 0.43 | 0.51 | 0.32 | 0.54 |
| 52 | 0.57 | 0.51 | 0.57 | 0.49 | 0.64 | 0.54 | 0.58 | 0.55 | 0.60 |
| 53 | 0.53 | 0.43 | 0.59 | 0.50 | 0.60 | 0.53 | 0.44 | 0.44 | 0.58 |
| 54 | 0.68 | 0.68 | 0.67 | 0.66 | 0.67 | 0.67 | 0.67 | 0.70 | 0.73 |
| 55 | 0.48 | 0.52 | 0.42 | 0.27 | 0.53 | 0.46 | 0.46 | 0.42 | 0.57 |
| 56 | 0.59 | 0.57 | 0.67 | 0.53 | 0.71 | 0.59 | 0.55 | 0.59 | 0.67 |

|    |      |      |      |      |      |      |      |      |      |
|----|------|------|------|------|------|------|------|------|------|
| 1  |      |      |      |      |      |      |      |      |      |
| 2  | 0.62 | 0.53 | 0.56 | 0.41 | 0.63 | 0.53 | 0.54 | 0.57 | 0.63 |
| 3  | 0.57 | 0.61 | 0.55 | 0.52 | 0.59 | 0.59 | 0.58 | 0.56 | 0.62 |
| 4  | 0.61 | 0.60 | 0.62 | 0.53 | 0.64 | 0.60 | 0.57 | 0.65 | 0.67 |
| 5  | 0.49 | 0.51 | 0.51 | 0.44 | 0.50 | 0.48 | 0.43 | 0.37 | 0.46 |
| 6  | 0.76 | 0.76 | 0.77 | 0.70 | 0.80 | 0.75 | 0.73 | 0.73 | 0.74 |
| 7  | 0.79 | 0.73 | 0.78 | 0.71 | 0.79 | 0.76 | 0.74 | 0.78 | 0.79 |
| 8  | 0.77 | 0.76 | 0.71 | 0.60 | 0.76 | 0.71 | 0.66 | 0.57 | 0.76 |
| 9  | 0.75 | 0.74 | 0.71 | 0.45 | 0.71 | 0.67 | 0.72 | 0.72 | 0.74 |
| 10 | 0.78 | 0.74 | 0.78 | 0.74 | 0.81 | 0.77 | 0.76 | 0.81 | 0.81 |
| 11 | 0.83 | 0.85 | 0.83 | 0.85 | 0.82 | 0.79 | 0.86 | 0.86 | 0.85 |
| 12 | 0.63 | 0.51 | 0.59 | 0.47 | 0.58 | 0.53 | 0.47 | 0.33 | 0.55 |
| 13 | 0.58 | 0.57 | 0.48 | 0.46 | 0.60 | 0.59 | 0.34 | 0.46 | 0.50 |
| 14 | 0.75 | 0.64 | 0.68 | 0.77 | 0.82 | 0.75 | 0.80 | 0.74 | 0.77 |
| 15 | 0.75 | 0.73 | 0.79 | 0.70 | 0.82 | 0.78 | 0.80 | 0.78 | 0.83 |
| 16 | 0.80 | 0.84 | 0.84 | 0.78 | 0.86 | 0.84 | 0.84 | 0.83 | 0.85 |
| 17 | 0.90 | 0.89 | 0.91 | 0.83 | 0.92 | 0.90 | 0.92 | 0.91 | 0.92 |
| 18 | 0.90 | 0.93 | 0.93 | 0.92 | 0.93 | 0.92 | 0.93 | 0.94 | 0.93 |
| 19 |      |      |      |      |      |      |      |      |      |
| 20 |      |      |      |      |      |      |      |      |      |
| 21 |      |      |      |      |      |      |      |      |      |
| 22 |      |      |      |      |      |      |      |      |      |
| 23 |      |      |      |      |      |      |      |      |      |
| 24 |      |      |      |      |      |      |      |      |      |
| 25 |      |      |      |      |      |      |      |      |      |
| 26 |      |      |      |      |      |      |      |      |      |
| 27 |      |      |      |      |      |      |      |      |      |
| 28 |      |      |      |      |      |      |      |      |      |
| 29 |      |      |      |      |      |      |      |      |      |
| 30 |      |      |      |      |      |      |      |      |      |
| 31 |      |      |      |      |      |      |      |      |      |
| 32 |      |      |      |      |      |      |      |      |      |
| 33 |      |      |      |      |      |      |      |      |      |
| 34 |      |      |      |      |      |      |      |      |      |
| 35 |      |      |      |      |      |      |      |      |      |
| 36 |      |      |      |      |      |      |      |      |      |
| 37 |      |      |      |      |      |      |      |      |      |
| 38 |      |      |      |      |      |      |      |      |      |
| 39 |      |      |      |      |      |      |      |      |      |
| 40 |      |      |      |      |      |      |      |      |      |
| 41 |      |      |      |      |      |      |      |      |      |
| 42 |      |      |      |      |      |      |      |      |      |
| 43 |      |      |      |      |      |      |      |      |      |
| 44 |      |      |      |      |      |      |      |      |      |
| 45 |      |      |      |      |      |      |      |      |      |
| 46 |      |      |      |      |      |      |      |      |      |
| 47 |      |      |      |      |      |      |      |      |      |
| 48 |      |      |      |      |      |      |      |      |      |
| 49 |      |      |      |      |      |      |      |      |      |
| 50 |      |      |      |      |      |      |      |      |      |
| 51 |      |      |      |      |      |      |      |      |      |
| 52 |      |      |      |      |      |      |      |      |      |
| 53 |      |      |      |      |      |      |      |      |      |
| 54 |      |      |      |      |      |      |      |      |      |
| 55 |      |      |      |      |      |      |      |      |      |
| 56 |      |      |      |      |      |      |      |      |      |
| 57 |      |      |      |      |      |      |      |      |      |
| 58 |      |      |      |      |      |      |      |      |      |
| 59 |      |      |      |      |      |      |      |      |      |
| 60 |      |      |      |      |      |      |      |      |      |

1  
2  
3  
4  
5  
6  
7  
8  
9  
10  
11  
12  
13  
14  
15  
16  
17 397 404 409 412 415 423 430 430 437  
18  
19

|    | RN7  | RHW  | RNL  | RCX  | RPA  | RWH  | RM2  | RR7  | RNS  |
|----|------|------|------|------|------|------|------|------|------|
| 20 |      |      |      |      |      |      |      |      |      |
| 21 |      |      |      |      |      |      |      |      |      |
| 22 | 0.52 | 0.53 | 0.56 | 0.52 | 0.55 | 0.56 | 0.51 | 0.55 | 0.58 |
| 23 | 0.53 | 0.54 | 0.55 | 0.54 | 0.57 | 0.56 | 0.56 | 0.56 | 0.56 |
| 24 | 0.38 | 0.42 | 0.39 | 0.42 | 0.42 | 0.46 | 0.49 | 0.41 | 0.45 |
| 25 | 0.18 | 0.43 | 0.28 | 0.17 | 0.22 | 0.34 | 0.22 | 0.28 | 0.30 |
| 26 | 0.33 | 0.38 | 0.38 | 0.33 | 0.41 | 0.41 | 0.40 | 0.36 | 0.41 |
| 27 | 0.52 | 0.54 | 0.59 | 0.57 | 0.57 | 0.60 | 0.56 | 0.53 | 0.57 |
| 28 | 0.60 | 0.62 | 0.62 | 0.60 | 0.63 | 0.63 | 0.61 | 0.62 | 0.64 |
| 29 | 0.48 | 0.54 | 0.50 | 0.43 | 0.52 | 0.56 | 0.49 | 0.45 | 0.54 |
| 30 | 0.49 | 0.45 | 0.48 | 0.52 | 0.52 | 0.55 | 0.43 | 0.43 | 0.54 |
| 31 | 0.45 | 0.52 | 0.58 | 0.50 | 0.51 | 0.55 | 0.45 | 0.44 | 0.53 |
| 32 | 0.42 | 0.50 | 0.45 | 0.40 | 0.50 | 0.51 | 0.52 | 0.42 | 0.53 |
| 33 | 0.11 | 0.40 | 0.31 | 0.18 | 0.22 | 0.36 | 0.20 | 0.18 | 0.30 |
| 34 | 0.54 | 0.61 | 0.60 | 0.58 | 0.60 | 0.62 | 0.54 | 0.54 | 0.62 |
| 35 | 0.63 | 0.69 | 0.70 | 0.67 | 0.70 | 0.70 | 0.68 | 0.63 | 0.69 |
| 36 | 0.47 | 0.43 | 0.46 | 0.48 | 0.51 | 0.52 | 0.54 | 0.37 | 0.51 |
| 37 | 0.35 | 0.35 | 0.38 | 0.45 | 0.55 | 0.45 | 0.49 | 0.32 | 0.47 |
| 38 | 0.56 | 0.66 | 0.68 | 0.63 | 0.67 | 0.68 | 0.64 | 0.60 | 0.66 |
| 39 | 0.50 | 0.51 | 0.58 | 0.53 | 0.55 | 0.55 | 0.43 | 0.50 | 0.62 |
| 40 | 0.55 | 0.59 | 0.49 | 0.57 | 0.62 | 0.62 | 0.67 | 0.50 | 0.62 |
| 41 | 0.64 | 0.68 | 0.71 | 0.66 | 0.68 | 0.72 | 0.70 | 0.68 | 0.69 |
| 42 | 0.67 | 0.68 | 0.69 | 0.62 | 0.68 | 0.70 | 0.70 | 0.71 | 0.70 |
| 43 | 0.63 | 0.69 | 0.71 | 0.65 | 0.69 | 0.70 | 0.64 | 0.63 | 0.69 |
| 44 | 0.18 | 0.21 | 0.27 | 0.28 | 0.16 | 0.24 | 0.21 | 0.12 | 0.33 |
| 45 | 0.47 | 0.58 | 0.56 | 0.53 | 0.59 | 0.54 | 0.52 | 0.44 | 0.58 |
| 46 | 0.56 | 0.60 | 0.59 | 0.56 | 0.62 | 0.65 | 0.54 | 0.46 | 0.64 |
| 47 | 0.72 | 0.69 | 0.73 | 0.72 | 0.71 | 0.71 | 0.72 | 0.74 | 0.72 |
| 48 | 0.76 | 0.78 | 0.78 | 0.76 | 0.78 | 0.79 | 0.78 | 0.76 | 0.79 |
| 49 | 0.47 | 0.46 | 0.42 | 0.52 | 0.55 | 0.60 | 0.58 | 0.48 | 0.55 |
| 50 | 0.41 | 0.45 | 0.60 | 0.50 | 0.54 | 0.54 | 0.36 | 0.44 | 0.57 |
| 51 | 0.51 | 0.61 | 0.65 | 0.59 | 0.63 | 0.63 | 0.63 | 0.58 | 0.65 |
| 52 | 0.46 | 0.48 | 0.55 | 0.52 | 0.58 | 0.65 | 0.61 | 0.45 | 0.64 |
| 53 | 0.72 | 0.72 | 0.68 | 0.69 | 0.72 | 0.74 | 0.64 | 0.58 | 0.73 |
| 54 | 0.40 | 0.62 | 0.48 | 0.47 | 0.58 | 0.58 | 0.47 | 0.29 | 0.57 |
| 55 | 0.58 | 0.62 | 0.54 | 0.62 | 0.69 | 0.69 | 0.68 | 0.60 | 0.70 |

|    |      |      |      |      |      |      |      |      |      |
|----|------|------|------|------|------|------|------|------|------|
| 1  |      |      |      |      |      |      |      |      |      |
| 2  | 0.56 | 0.62 | 0.62 | 0.55 | 0.63 | 0.62 | 0.61 | 0.53 | 0.63 |
| 3  | 0.47 | 0.62 | 0.61 | 0.55 | 0.53 | 0.61 | 0.66 | 0.60 | 0.59 |
| 4  | 0.61 | 0.64 | 0.60 | 0.59 | 0.60 | 0.64 | 0.69 | 0.64 | 0.67 |
| 5  | 0.34 | 0.39 | 0.46 | 0.47 | 0.54 | 0.60 | 0.54 | 0.29 | 0.46 |
| 6  | 0.74 | 0.76 | 0.76 | 0.76 | 0.80 | 0.79 | 0.83 | 0.72 | 0.79 |
| 7  | 0.78 | 0.79 | 0.77 | 0.79 | 0.79 | 0.78 | 0.81 | 0.78 | 0.82 |
| 8  | 0.69 | 0.79 | 0.83 | 0.76 | 0.73 | 0.79 | 0.76 | 0.67 | 0.78 |
| 9  | 0.70 | 0.77 | 0.76 | 0.67 | 0.74 | 0.77 | 0.71 | 0.67 | 0.77 |
| 10 | 0.78 | 0.77 | 0.80 | 0.80 | 0.80 | 0.81 | 0.82 | 0.80 | 0.80 |
| 11 | 0.84 | 0.85 | 0.85 | 0.85 | 0.87 | 0.87 | 0.86 | 0.82 | 0.85 |
| 12 | 0.56 | 0.64 | 0.51 | 0.62 | 0.57 | 0.53 | 0.65 | 0.45 | 0.64 |
| 13 | 0.68 | 0.57 | 0.73 | 0.52 | 0.56 | 0.65 | 0.51 | 0.54 | 0.70 |
| 14 | 0.74 | 0.62 | 0.82 | 0.81 | 0.77 | 0.81 | 0.74 | 0.66 | 0.72 |
| 15 | 0.77 | 0.82 | 0.85 | 0.80 | 0.83 | 0.78 | 0.79 | 0.81 | 0.83 |
| 16 | 0.84 | 0.87 | 0.80 | 0.83 | 0.88 | 0.88 | 0.89 | 0.85 | 0.86 |
| 17 | 0.90 | 0.92 | 0.92 | 0.91 | 0.92 | 0.93 | 0.92 | 0.91 | 0.93 |
| 18 | 0.93 | 0.91 | 0.91 | 0.93 | 0.93 | 0.93 | 0.95 | 0.92 | 0.93 |
| 19 |      |      |      |      |      |      |      |      |      |
| 20 |      |      |      |      |      |      |      |      |      |
| 21 |      |      |      |      |      |      |      |      |      |
| 22 |      |      |      |      |      |      |      |      |      |
| 23 |      |      |      |      |      |      |      |      |      |
| 24 |      |      |      |      |      |      |      |      |      |
| 25 |      |      |      |      |      |      |      |      |      |
| 26 |      |      |      |      |      |      |      |      |      |
| 27 |      |      |      |      |      |      |      |      |      |
| 28 |      |      |      |      |      |      |      |      |      |
| 29 |      |      |      |      |      |      |      |      |      |
| 30 |      |      |      |      |      |      |      |      |      |
| 31 |      |      |      |      |      |      |      |      |      |
| 32 |      |      |      |      |      |      |      |      |      |
| 33 |      |      |      |      |      |      |      |      |      |
| 34 |      |      |      |      |      |      |      |      |      |
| 35 |      |      |      |      |      |      |      |      |      |
| 36 |      |      |      |      |      |      |      |      |      |
| 37 |      |      |      |      |      |      |      |      |      |
| 38 |      |      |      |      |      |      |      |      |      |
| 39 |      |      |      |      |      |      |      |      |      |
| 40 |      |      |      |      |      |      |      |      |      |
| 41 |      |      |      |      |      |      |      |      |      |
| 42 |      |      |      |      |      |      |      |      |      |
| 43 |      |      |      |      |      |      |      |      |      |
| 44 |      |      |      |      |      |      |      |      |      |
| 45 |      |      |      |      |      |      |      |      |      |
| 46 |      |      |      |      |      |      |      |      |      |
| 47 |      |      |      |      |      |      |      |      |      |
| 48 |      |      |      |      |      |      |      |      |      |
| 49 |      |      |      |      |      |      |      |      |      |
| 50 |      |      |      |      |      |      |      |      |      |
| 51 |      |      |      |      |      |      |      |      |      |
| 52 |      |      |      |      |      |      |      |      |      |
| 53 |      |      |      |      |      |      |      |      |      |
| 54 |      |      |      |      |      |      |      |      |      |
| 55 |      |      |      |      |      |      |      |      |      |
| 56 |      |      |      |      |      |      |      |      |      |
| 57 |      |      |      |      |      |      |      |      |      |
| 58 |      |      |      |      |      |      |      |      |      |
| 59 |      |      |      |      |      |      |      |      |      |
| 60 |      |      |      |      |      |      |      |      |      |

1  
2  
3  
4  
5  
6  
7  
8  
9  
10  
11  
12  
13  
14  
15  
16  
17  
18  
19  
20  
21  
22  
23  
24  
25  
26  
27  
28  
29  
30  
31  
32  
33  
34  
35  
36  
37  
38  
39  
40  
41  
42  
43  
44  
45  
46  
47  
48  
49  
50  
51  
52  
53  
54  
55  
56  
57  
58  
59  
60

438 439 443 448 451 467 470 484 496

| RN3  | RGN  | RVW  | RNZ  | RDE  | RLN  | RWY  | RGQ  | RXP  |
|------|------|------|------|------|------|------|------|------|
| 0.55 | 0.54 | 0.54 | 0.55 | 0.55 | 0.58 | 0.58 | 0.61 | 0.59 |
| 0.58 | 0.55 | 0.57 | 0.55 | 0.57 | 0.59 | 0.57 | 0.58 | 0.60 |
| 0.44 | 0.44 | 0.45 | 0.40 | 0.44 | 0.42 | 0.41 | 0.43 | 0.46 |
| 0.22 | 0.26 | 0.24 | 0.20 | 0.28 | 0.22 | 0.23 | 0.32 | 0.21 |
| 0.40 | 0.38 | 0.36 | 0.38 | 0.36 | 0.36 | 0.43 | 0.37 | 0.41 |
| 0.58 | 0.57 | 0.55 | 0.60 | 0.57 | 0.59 | 0.60 | 0.63 | 0.63 |
| 0.64 | 0.61 | 0.62 | 0.63 | 0.64 | 0.64 | 0.66 | 0.65 | 0.66 |
| 0.51 | 0.50 | 0.47 | 0.55 | 0.51 | 0.54 | 0.55 | 0.57 | 0.59 |
| 0.49 | 0.51 | 0.50 | 0.51 | 0.53 | 0.58 | 0.53 | 0.55 | 0.56 |
| 0.53 | 0.51 | 0.47 | 0.49 | 0.54 | 0.55 | 0.54 | 0.53 | 0.58 |
| 0.51 | 0.49 | 0.45 | 0.42 | 0.48 | 0.46 | 0.48 | 0.47 | 0.50 |
| 0.22 | 0.21 | 0.18 | 0.16 | 0.21 | 0.19 | 0.16 | 0.22 | 0.25 |
| 0.59 | 0.58 | 0.55 | 0.54 | 0.59 | 0.61 | 0.62 | 0.58 | 0.60 |
| 0.70 | 0.68 | 0.66 | 0.70 | 0.68 | 0.68 | 0.72 | 0.71 | 0.73 |
| 0.47 | 0.36 | 0.45 | 0.44 | 0.41 | 0.49 | 0.50 | 0.43 | 0.49 |
| 0.46 | 0.41 | 0.46 | 0.40 | 0.42 | 0.41 | 0.43 | 0.41 | 0.48 |
| 0.64 | 0.64 | 0.59 | 0.65 | 0.66 | 0.68 | 0.69 | 0.68 | 0.71 |
| 0.63 | 0.53 | 0.58 | 0.51 | 0.57 | 0.53 | 0.60 | 0.60 | 0.61 |
| 0.64 | 0.57 | 0.60 | 0.56 | 0.61 | 0.57 | 0.60 | 0.61 | 0.63 |
| 0.67 | 0.68 | 0.69 | 0.70 | 0.67 | 0.73 | 0.71 | 0.74 | 0.74 |
| 0.69 | 0.67 | 0.68 | 0.67 | 0.70 | 0.72 | 0.69 | 0.69 | 0.72 |
| 0.70 | 0.70 | 0.65 | 0.63 | 0.67 | 0.68 | 0.69 | 0.68 | 0.71 |
| 0.21 | 0.21 | 0.21 | 0.19 | 0.23 | 0.29 | 0.24 | 0.19 | 0.28 |
| 0.57 | 0.56 | 0.56 | 0.46 | 0.58 | 0.49 | 0.58 | 0.53 | 0.64 |
| 0.62 | 0.58 | 0.53 | 0.48 | 0.60 | 0.54 | 0.58 | 0.61 | 0.60 |
| 0.71 | 0.75 | 0.74 | 0.75 | 0.73 | 0.76 | 0.76 | 0.76 | 0.76 |
| 0.79 | 0.78 | 0.76 | 0.78 | 0.79 | 0.78 | 0.80 | 0.80 | 0.81 |
| 0.61 | 0.55 | 0.56 | 0.56 | 0.56 | 0.57 | 0.49 | 0.52 | 0.54 |
| 0.59 | 0.51 | 0.48 | 0.47 | 0.52 | 0.53 | 0.58 | 0.60 | 0.58 |
| 0.66 | 0.59 | 0.56 | 0.63 | 0.63 | 0.66 | 0.67 | 0.57 | 0.66 |
| 0.58 | 0.49 | 0.58 | 0.47 | 0.48 | 0.54 | 0.54 | 0.54 | 0.58 |
| 0.75 | 0.70 | 0.66 | 0.69 | 0.75 | 0.72 | 0.73 | 0.73 | 0.74 |
| 0.50 | 0.42 | 0.47 | 0.41 | 0.49 | 0.54 | 0.49 | 0.42 | 0.51 |
| 0.66 | 0.68 | 0.62 | 0.57 | 0.64 | 0.67 | 0.60 | 0.57 | 0.71 |

|    |      |      |      |      |      |      |      |      |      |
|----|------|------|------|------|------|------|------|------|------|
| 1  |      |      |      |      |      |      |      |      |      |
| 2  | 0.57 | 0.51 | 0.55 | 0.54 | 0.56 | 0.62 | 0.68 | 0.60 | 0.67 |
| 3  | 0.68 | 0.37 | 0.62 | 0.53 | 0.61 | 0.64 | 0.62 | 0.58 | 0.64 |
| 4  | 0.60 | 0.60 | 0.64 | 0.62 | 0.65 | 0.69 | 0.66 | 0.63 | 0.71 |
| 5  | 0.43 | 0.37 | 0.52 | 0.29 | 0.43 | 0.52 | 0.37 | 0.43 | 0.51 |
| 6  | 0.82 | 0.78 | 0.79 | 0.76 | 0.78 | 0.77 | 0.79 | 0.79 | 0.81 |
| 7  | 0.81 | 0.76 | 0.79 | 0.79 | 0.80 | 0.84 | 0.81 | 0.80 | 0.83 |
| 8  | 0.77 | 0.71 | 0.67 | 0.70 | 0.75 | 0.72 | 0.69 | 0.76 | 0.77 |
| 9  | 0.78 | 0.73 | 0.59 | 0.73 | 0.76 | 0.74 | 0.77 | 0.81 | 0.74 |
| 10 | 0.81 | 0.77 | 0.82 | 0.78 | 0.80 | 0.85 | 0.82 | 0.79 | 0.84 |
| 11 | 0.86 | 0.86 | 0.80 | 0.87 | 0.86 | 0.86 | 0.87 | 0.88 | 0.89 |
| 12 | 0.45 | 0.40 | 0.53 | 0.58 | 0.50 | 0.52 | 0.57 | 0.48 | 0.52 |
| 13 | 0.54 | 0.57 | 0.46 | 0.46 | 0.63 | 0.49 | 0.56 | 0.51 | 0.58 |
| 14 | 0.78 | 0.75 | 0.76 | 0.81 | 0.70 | 0.77 | 0.84 | 0.75 | 0.77 |
| 15 | 0.79 | 0.78 | 0.81 | 0.83 | 0.79 | 0.85 | 0.86 | 0.80 | 0.86 |
| 16 | 0.86 | 0.85 | 0.87 | 0.84 | 0.87 | 0.85 | 0.87 | 0.85 | 0.85 |
| 17 | 0.93 | 0.93 | 0.90 | 0.91 | 0.92 | 0.91 | 0.92 | 0.93 | 0.92 |
| 18 | 0.95 | 0.93 | 0.93 | 0.93 | 0.95 | 0.94 | 0.95 | 0.94 | 0.94 |
| 19 |      |      |      |      |      |      |      |      |      |
| 20 |      |      |      |      |      |      |      |      |      |
| 21 |      |      |      |      |      |      |      |      |      |
| 22 |      |      |      |      |      |      |      |      |      |
| 23 |      |      |      |      |      |      |      |      |      |
| 24 |      |      |      |      |      |      |      |      |      |
| 25 |      |      |      |      |      |      |      |      |      |
| 26 |      |      |      |      |      |      |      |      |      |
| 27 |      |      |      |      |      |      |      |      |      |
| 28 |      |      |      |      |      |      |      |      |      |
| 29 |      |      |      |      |      |      |      |      |      |
| 30 |      |      |      |      |      |      |      |      |      |
| 31 |      |      |      |      |      |      |      |      |      |
| 32 |      |      |      |      |      |      |      |      |      |
| 33 |      |      |      |      |      |      |      |      |      |
| 34 |      |      |      |      |      |      |      |      |      |
| 35 |      |      |      |      |      |      |      |      |      |
| 36 |      |      |      |      |      |      |      |      |      |
| 37 |      |      |      |      |      |      |      |      |      |
| 38 |      |      |      |      |      |      |      |      |      |
| 39 |      |      |      |      |      |      |      |      |      |
| 40 |      |      |      |      |      |      |      |      |      |
| 41 |      |      |      |      |      |      |      |      |      |
| 42 |      |      |      |      |      |      |      |      |      |
| 43 |      |      |      |      |      |      |      |      |      |
| 44 |      |      |      |      |      |      |      |      |      |
| 45 |      |      |      |      |      |      |      |      |      |
| 46 |      |      |      |      |      |      |      |      |      |
| 47 |      |      |      |      |      |      |      |      |      |
| 48 |      |      |      |      |      |      |      |      |      |
| 49 |      |      |      |      |      |      |      |      |      |
| 50 |      |      |      |      |      |      |      |      |      |
| 51 |      |      |      |      |      |      |      |      |      |
| 52 |      |      |      |      |      |      |      |      |      |
| 53 |      |      |      |      |      |      |      |      |      |
| 54 |      |      |      |      |      |      |      |      |      |
| 55 |      |      |      |      |      |      |      |      |      |
| 56 |      |      |      |      |      |      |      |      |      |
| 57 |      |      |      |      |      |      |      |      |      |
| 58 |      |      |      |      |      |      |      |      |      |
| 59 |      |      |      |      |      |      |      |      |      |
| 60 |      |      |      |      |      |      |      |      |      |



1  
2  
3  
4  
5  
6  
7  
8  
9  
10  
11  
12  
13  
14  
15  
16  
17  
18  
19  
20  
21  
22  
23  
24  
25  
26  
27  
28  
29  
30  
31  
32  
33  
34  
35  
36  
37  
38  
39  
40  
41  
42  
43  
44  
45  
46  
47  
48  
49  
50  
51  
52  
53  
54  
55  
56  
57  
58  
59  
60

506 506 507 516 517 523 529 540 542

| RXH  | RXK  | RD1  | RJL  | RXF  | RQ8  | RXQ  | RTF  | RD3  |
|------|------|------|------|------|------|------|------|------|
| 0.58 | 0.59 | 0.61 | 0.61 | 0.60 | 0.61 | 0.58 | 0.60 | 0.63 |
| 0.58 | 0.61 | 0.60 | 0.61 | 0.62 | 0.60 | 0.61 | 0.61 | 0.61 |
| 0.47 | 0.46 | 0.44 | 0.49 | 0.48 | 0.48 | 0.45 | 0.43 | 0.48 |
| 0.27 | 0.29 | 0.31 | 0.24 | 0.24 | 0.20 | 0.16 | 0.28 | 0.37 |
| 0.46 | 0.47 | 0.43 | 0.39 | 0.44 | 0.41 | 0.45 | 0.37 | 0.42 |
| 0.63 | 0.62 | 0.61 | 0.64 | 0.60 | 0.62 | 0.64 | 0.58 | 0.66 |
| 0.66 | 0.67 | 0.67 | 0.67 | 0.68 | 0.67 | 0.67 | 0.68 | 0.69 |
| 0.55 | 0.47 | 0.57 | 0.61 | 0.60 | 0.59 | 0.56 | 0.53 | 0.57 |
| 0.53 | 0.55 | 0.56 | 0.59 | 0.57 | 0.54 | 0.59 | 0.55 | 0.58 |
| 0.57 | 0.53 | 0.55 | 0.59 | 0.56 | 0.55 | 0.57 | 0.52 | 0.58 |
| 0.51 | 0.54 | 0.50 | 0.53 | 0.53 | 0.53 | 0.52 | 0.45 | 0.53 |
| 0.16 | 0.20 | 0.24 | 0.16 | 0.18 | 0.15 | 0.16 | 0.18 | 0.34 |
| 0.61 | 0.62 | 0.59 | 0.65 | 0.60 | 0.63 | 0.61 | 0.58 | 0.66 |
| 0.73 | 0.73 | 0.73 | 0.72 | 0.71 | 0.72 | 0.74 | 0.69 | 0.73 |
| 0.51 | 0.50 | 0.46 | 0.49 | 0.47 | 0.51 | 0.53 | 0.45 | 0.48 |
| 0.48 | 0.53 | 0.44 | 0.45 | 0.51 | 0.41 | 0.43 | 0.43 | 0.45 |
| 0.70 | 0.70 | 0.67 | 0.71 | 0.71 | 0.70 | 0.71 | 0.69 | 0.71 |
| 0.47 | 0.60 | 0.55 | 0.64 | 0.62 | 0.58 | 0.62 | 0.61 | 0.64 |
| 0.63 | 0.65 | 0.63 | 0.59 | 0.66 | 0.64 | 0.59 | 0.57 | 0.64 |
| 0.73 | 0.71 | 0.72 | 0.75 | 0.74 | 0.73 | 0.74 | 0.73 | 0.76 |
| 0.69 | 0.72 | 0.72 | 0.72 | 0.74 | 0.73 | 0.72 | 0.74 | 0.73 |
| 0.71 | 0.71 | 0.70 | 0.74 | 0.70 | 0.72 | 0.73 | 0.69 | 0.72 |
| 0.23 | 0.25 | 0.28 | 0.28 | 0.34 | 0.19 | 0.34 | 0.32 | 0.26 |
| 0.57 | 0.62 | 0.57 | 0.56 | 0.61 | 0.58 | 0.59 | 0.51 | 0.56 |
| 0.68 | 0.62 | 0.56 | 0.67 | 0.61 | 0.64 | 0.64 | 0.55 | 0.58 |
| 0.77 | 0.77 | 0.76 | 0.77 | 0.77 | 0.77 | 0.76 | 0.78 | 0.78 |
| 0.80 | 0.81 | 0.81 | 0.81 | 0.81 | 0.81 | 0.81 | 0.81 | 0.81 |
| 0.55 | 0.65 | 0.58 | 0.53 | 0.60 | 0.49 | 0.56 | 0.55 | 0.56 |
| 0.41 | 0.54 | 0.56 | 0.61 | 0.58 | 0.53 | 0.57 | 0.57 | 0.62 |
| 0.67 | 0.64 | 0.65 | 0.67 | 0.68 | 0.64 | 0.65 | 0.67 | 0.68 |
| 0.59 | 0.62 | 0.60 | 0.65 | 0.65 | 0.57 | 0.60 | 0.58 | 0.59 |
| 0.77 | 0.74 | 0.70 | 0.75 | 0.72 | 0.74 | 0.72 | 0.73 | 0.76 |
| 0.55 | 0.52 | 0.47 | 0.53 | 0.49 | 0.57 | 0.51 | 0.37 | 0.44 |
| 0.70 | 0.72 | 0.66 | 0.70 | 0.68 | 0.70 | 0.65 | 0.56 | 0.62 |

|    |      |      |      |      |      |      |      |      |      |
|----|------|------|------|------|------|------|------|------|------|
| 1  |      |      |      |      |      |      |      |      |      |
| 2  | 0.61 | 0.67 | 0.57 | 0.66 | 0.63 | 0.64 | 0.68 | 0.61 | 0.60 |
| 3  | 0.62 | 0.61 | 0.60 | 0.68 | 0.64 | 0.67 | 0.66 | 0.65 | 0.69 |
| 4  | 0.65 | 0.67 | 0.64 | 0.64 | 0.71 | 0.65 | 0.64 | 0.70 | 0.72 |
| 5  | 0.52 | 0.53 | 0.55 | 0.48 | 0.49 | 0.53 | 0.51 | 0.58 | 0.48 |
| 6  | 0.78 | 0.80 | 0.81 | 0.81 | 0.83 | 0.79 | 0.78 | 0.78 | 0.81 |
| 7  | 0.79 | 0.82 | 0.80 | 0.82 | 0.84 | 0.80 | 0.79 | 0.85 | 0.85 |
| 8  | 0.80 | 0.76 | 0.70 | 0.83 | 0.75 | 0.79 | 0.76 | 0.76 | 0.75 |
| 9  | 0.80 | 0.75 | 0.72 | 0.73 | 0.71 | 0.80 | 0.83 | 0.73 | 0.75 |
| 10 | 0.80 | 0.75 | 0.72 | 0.73 | 0.71 | 0.80 | 0.83 | 0.73 | 0.75 |
| 11 | 0.83 | 0.85 | 0.82 | 0.86 | 0.85 | 0.83 | 0.81 | 0.85 | 0.84 |
| 12 | 0.81 | 0.82 | 0.88 | 0.90 | 0.87 | 0.89 | 0.88 | 0.89 | 0.89 |
| 13 | 0.59 | 0.64 | 0.55 | 0.65 | 0.64 | 0.55 | 0.63 | 0.48 | 0.63 |
| 14 | 0.61 | 0.72 | 0.53 | 0.66 | 0.51 | 0.54 | 0.62 | 0.53 | 0.58 |
| 15 | 0.86 | 0.76 | 0.80 | 0.83 | 0.86 | 0.79 | 0.81 | 0.79 | 0.72 |
| 16 | 0.82 | 0.86 | 0.82 | 0.87 | 0.86 | 0.85 | 0.82 | 0.86 | 0.85 |
| 17 | 0.82 | 0.86 | 0.82 | 0.87 | 0.86 | 0.85 | 0.82 | 0.86 | 0.85 |
| 18 | 0.87 | 0.87 | 0.86 | 0.88 | 0.88 | 0.88 | 0.88 | 0.86 | 0.88 |
| 19 | 0.94 | 0.94 | 0.94 | 0.94 | 0.93 | 0.94 | 0.93 | 0.91 | 0.92 |
| 20 | 0.95 | 0.95 | 0.95 | 0.94 | 0.95 | 0.94 | 0.95 | 0.94 | 0.94 |
| 21 |      |      |      |      |      |      |      |      |      |
| 22 |      |      |      |      |      |      |      |      |      |
| 23 |      |      |      |      |      |      |      |      |      |
| 24 |      |      |      |      |      |      |      |      |      |
| 25 |      |      |      |      |      |      |      |      |      |
| 26 |      |      |      |      |      |      |      |      |      |
| 27 |      |      |      |      |      |      |      |      |      |
| 28 |      |      |      |      |      |      |      |      |      |
| 29 |      |      |      |      |      |      |      |      |      |
| 30 |      |      |      |      |      |      |      |      |      |
| 31 |      |      |      |      |      |      |      |      |      |
| 32 |      |      |      |      |      |      |      |      |      |
| 33 |      |      |      |      |      |      |      |      |      |
| 34 |      |      |      |      |      |      |      |      |      |
| 35 |      |      |      |      |      |      |      |      |      |
| 36 |      |      |      |      |      |      |      |      |      |
| 37 |      |      |      |      |      |      |      |      |      |
| 38 |      |      |      |      |      |      |      |      |      |
| 39 |      |      |      |      |      |      |      |      |      |
| 40 |      |      |      |      |      |      |      |      |      |
| 41 |      |      |      |      |      |      |      |      |      |
| 42 |      |      |      |      |      |      |      |      |      |
| 43 |      |      |      |      |      |      |      |      |      |
| 44 |      |      |      |      |      |      |      |      |      |
| 45 |      |      |      |      |      |      |      |      |      |
| 46 |      |      |      |      |      |      |      |      |      |
| 47 |      |      |      |      |      |      |      |      |      |
| 48 |      |      |      |      |      |      |      |      |      |
| 49 |      |      |      |      |      |      |      |      |      |
| 50 |      |      |      |      |      |      |      |      |      |
| 51 |      |      |      |      |      |      |      |      |      |
| 52 |      |      |      |      |      |      |      |      |      |
| 53 |      |      |      |      |      |      |      |      |      |
| 54 |      |      |      |      |      |      |      |      |      |
| 55 |      |      |      |      |      |      |      |      |      |
| 56 |      |      |      |      |      |      |      |      |      |
| 57 |      |      |      |      |      |      |      |      |      |
| 58 |      |      |      |      |      |      |      |      |      |
| 59 |      |      |      |      |      |      |      |      |      |
| 60 |      |      |      |      |      |      |      |      |      |

1  
2  
3  
4  
5  
6  
7  
8  
9  
10  
11  
12  
13  
14  
15  
16  
17  
18  
19  
20  
21  
22  
23  
24  
25  
26  
27  
28  
29  
30  
31  
32  
33  
34  
35  
36  
37  
38  
39  
40  
41  
42  
43  
44  
45  
46  
47  
48  
49  
50  
51  
52  
53  
54  
55  
56  
57  
58  
59  
60

548 552 572 594 602 613 623 631 644

| RW6  | RNA  | RA9  | RA2  | RTX  | RXC  | RXL  | RBA  | RAJ  |
|------|------|------|------|------|------|------|------|------|
| 0.64 | 0.61 | 0.58 | 0.63 | 0.63 | 0.64 | 0.63 | 0.63 | 0.64 |
| 0.63 | 0.62 | 0.60 | 0.62 | 0.62 | 0.63 | 0.66 | 0.63 | 0.64 |
| 0.47 | 0.49 | 0.46 | 0.55 | 0.46 | 0.49 | 0.53 | 0.50 | 0.53 |
| 0.29 | 0.21 | 0.39 | 0.32 | 0.22 | 0.21 | 0.25 | 0.33 | 0.41 |
| 0.44 | 0.45 | 0.46 | 0.52 | 0.39 | 0.43 | 0.45 | 0.46 | 0.46 |
| 0.66 | 0.63 | 0.63 | 0.67 | 0.65 | 0.68 | 0.67 | 0.65 | 0.69 |
| 0.68 | 0.68 | 0.68 | 0.71 | 0.70 | 0.70 | 0.72 | 0.71 | 0.72 |
| 0.57 | 0.57 | 0.54 | 0.57 | 0.59 | 0.62 | 0.62 | 0.60 | 0.60 |
| 0.62 | 0.60 | 0.58 | 0.62 | 0.60 | 0.63 | 0.62 | 0.62 | 0.56 |
| 0.59 | 0.57 | 0.56 | 0.61 | 0.56 | 0.61 | 0.62 | 0.60 | 0.61 |
| 0.51 | 0.53 | 0.46 | 0.62 | 0.49 | 0.52 | 0.57 | 0.49 | 0.59 |
| 0.21 | 0.13 | 0.35 | 0.30 | 0.17 | 0.22 | 0.25 | 0.29 | 0.40 |
| 0.65 | 0.64 | 0.62 | 0.67 | 0.65 | 0.68 | 0.67 | 0.63 | 0.67 |
| 0.75 | 0.74 | 0.72 | 0.76 | 0.74 | 0.77 | 0.76 | 0.75 | 0.76 |
| 0.53 | 0.54 | 0.51 | 0.66 | 0.53 | 0.56 | 0.50 | 0.46 | 0.59 |
| 0.51 | 0.48 | 0.48 | 0.57 | 0.47 | 0.50 | 0.51 | 0.38 | 0.58 |
| 0.74 | 0.72 | 0.65 | 0.73 | 0.71 | 0.74 | 0.74 | 0.72 | 0.76 |
| 0.52 | 0.65 | 0.56 | 0.56 | 0.60 | 0.65 | 0.66 | 0.64 | 0.69 |
| 0.65 | 0.64 | 0.62 | 0.73 | 0.61 | 0.66 | 0.68 | 0.62 | 0.70 |
| 0.75 | 0.75 | 0.72 | 0.75 | 0.75 | 0.77 | 0.77 | 0.73 | 0.76 |
| 0.75 | 0.74 | 0.73 | 0.76 | 0.73 | 0.75 | 0.76 | 0.74 | 0.76 |
| 0.75 | 0.75 | 0.71 | 0.73 | 0.72 | 0.76 | 0.75 | 0.72 | 0.75 |
| 0.29 | 0.19 | 0.34 | 0.35 | 0.28 | 0.17 | 0.28 | 0.31 | 0.31 |
| 0.61 | 0.61 | 0.57 | 0.66 | 0.58 | 0.58 | 0.61 | 0.56 | 0.66 |
| 0.62 | 0.69 | 0.62 | 0.70 | 0.67 | 0.68 | 0.66 | 0.63 | 0.64 |
| 0.77 | 0.78 | 0.78 | 0.78 | 0.80 | 0.78 | 0.81 | 0.81 | 0.78 |
| 0.83 | 0.82 | 0.82 | 0.83 | 0.82 | 0.84 | 0.84 | 0.83 | 0.84 |
| 0.62 | 0.56 | 0.55 | 0.69 | 0.51 | 0.58 | 0.62 | 0.52 | 0.59 |
| 0.49 | 0.58 | 0.45 | 0.54 | 0.57 | 0.60 | 0.61 | 0.55 | 0.66 |
| 0.70 | 0.66 | 0.59 | 0.68 | 0.68 | 0.70 | 0.72 | 0.66 | 0.70 |
| 0.68 | 0.56 | 0.53 | 0.65 | 0.55 | 0.62 | 0.63 | 0.59 | 0.58 |
| 0.74 | 0.75 | 0.75 | 0.81 | 0.79 | 0.80 | 0.78 | 0.75 | 0.78 |
| 0.63 | 0.56 | 0.48 | 0.52 | 0.54 | 0.54 | 0.65 | 0.48 | 0.49 |
| 0.70 | 0.69 | 0.62 | 0.75 | 0.62 | 0.71 | 0.73 | 0.69 | 0.72 |

|    |      |      |      |      |      |      |      |      |      |
|----|------|------|------|------|------|------|------|------|------|
| 1  |      |      |      |      |      |      |      |      |      |
| 2  | 0.71 | 0.63 | 0.67 | 0.63 | 0.63 | 0.76 | 0.69 | 0.65 | 0.66 |
| 3  | 0.69 | 0.70 | 0.65 | 0.69 | 0.64 | 0.70 | 0.63 | 0.60 | 0.71 |
| 4  | 0.74 | 0.66 | 0.65 | 0.68 | 0.67 | 0.67 | 0.72 | 0.66 | 0.72 |
| 5  | 0.60 | 0.52 | 0.43 | 0.60 | 0.59 | 0.49 | 0.59 | 0.50 | 0.43 |
| 6  | 0.81 | 0.83 | 0.79 | 0.86 | 0.79 | 0.81 | 0.82 | 0.77 | 0.85 |
| 7  | 0.86 | 0.81 | 0.80 | 0.83 | 0.84 | 0.83 | 0.86 | 0.82 | 0.85 |
| 8  | 0.83 | 0.81 | 0.74 | 0.82 | 0.79 | 0.83 | 0.79 | 0.74 | 0.79 |
| 9  | 0.81 | 0.80 | 0.79 | 0.81 | 0.79 | 0.84 | 0.84 | 0.76 | 0.81 |
| 10 | 0.85 | 0.86 | 0.81 | 0.81 | 0.85 | 0.85 | 0.86 | 0.84 | 0.86 |
| 11 | 0.89 | 0.86 | 0.87 | 0.90 | 0.88 | 0.90 | 0.90 | 0.90 | 0.90 |
| 12 | 0.66 | 0.67 | 0.66 | 0.67 | 0.52 | 0.52 | 0.59 | 0.43 | 0.52 |
| 13 | 0.68 | 0.74 | 0.53 | 0.70 | 0.70 | 0.62 | 0.53 | 0.46 | 0.75 |
| 14 | 0.84 | 0.86 | 0.79 | 0.83 | 0.82 | 0.77 | 0.74 | 0.81 | 0.85 |
| 15 | 0.87 | 0.84 | 0.78 | 0.86 | 0.85 | 0.89 | 0.87 | 0.83 | 0.80 |
| 16 | 0.87 | 0.90 | 0.88 | 0.92 | 0.87 | 0.86 | 0.91 | 0.89 | 0.91 |
| 17 | 0.94 | 0.95 | 0.93 | 0.95 | 0.94 | 0.95 | 0.94 | 0.91 | 0.95 |
| 18 | 0.94 | 0.95 | 0.94 | 0.95 | 0.96 | 0.95 | 0.95 | 0.96 | 0.95 |
| 19 |      |      |      |      |      |      |      |      |      |
| 20 |      |      |      |      |      |      |      |      |      |
| 21 |      |      |      |      |      |      |      |      |      |
| 22 |      |      |      |      |      |      |      |      |      |
| 23 |      |      |      |      |      |      |      |      |      |
| 24 |      |      |      |      |      |      |      |      |      |
| 25 |      |      |      |      |      |      |      |      |      |
| 26 |      |      |      |      |      |      |      |      |      |
| 27 |      |      |      |      |      |      |      |      |      |
| 28 |      |      |      |      |      |      |      |      |      |
| 29 |      |      |      |      |      |      |      |      |      |
| 30 |      |      |      |      |      |      |      |      |      |
| 31 |      |      |      |      |      |      |      |      |      |
| 32 |      |      |      |      |      |      |      |      |      |
| 33 |      |      |      |      |      |      |      |      |      |
| 34 |      |      |      |      |      |      |      |      |      |
| 35 |      |      |      |      |      |      |      |      |      |
| 36 |      |      |      |      |      |      |      |      |      |
| 37 |      |      |      |      |      |      |      |      |      |
| 38 |      |      |      |      |      |      |      |      |      |
| 39 |      |      |      |      |      |      |      |      |      |
| 40 |      |      |      |      |      |      |      |      |      |
| 41 |      |      |      |      |      |      |      |      |      |
| 42 |      |      |      |      |      |      |      |      |      |
| 43 |      |      |      |      |      |      |      |      |      |
| 44 |      |      |      |      |      |      |      |      |      |
| 45 |      |      |      |      |      |      |      |      |      |
| 46 |      |      |      |      |      |      |      |      |      |
| 47 |      |      |      |      |      |      |      |      |      |
| 48 |      |      |      |      |      |      |      |      |      |
| 49 |      |      |      |      |      |      |      |      |      |
| 50 |      |      |      |      |      |      |      |      |      |
| 51 |      |      |      |      |      |      |      |      |      |
| 52 |      |      |      |      |      |      |      |      |      |
| 53 |      |      |      |      |      |      |      |      |      |
| 54 |      |      |      |      |      |      |      |      |      |
| 55 |      |      |      |      |      |      |      |      |      |
| 56 |      |      |      |      |      |      |      |      |      |
| 57 |      |      |      |      |      |      |      |      |      |
| 58 |      |      |      |      |      |      |      |      |      |
| 59 |      |      |      |      |      |      |      |      |      |
| 60 |      |      |      |      |      |      |      |      |      |

1  
2  
3  
4  
5  
6  
7  
8  
9  
10  
11  
12  
13  
14  
15  
16  
17 659 666 673 678 698 707 723 728 738  
18  
19

|    | RRK  | RHU  | RXR  | RJ7  | RR1  | RYR  | RXN  | RYJ  | RX1  |
|----|------|------|------|------|------|------|------|------|------|
| 20 |      |      |      |      |      |      |      |      |      |
| 21 |      |      |      |      |      |      |      |      |      |
| 22 | 0.67 | 0.66 | 0.65 | 0.67 | 0.65 | 0.69 | 0.65 | 0.70 | 0.68 |
| 23 | 0.66 | 0.66 | 0.68 | 0.66 | 0.68 | 0.67 | 0.68 | 0.68 | 0.69 |
| 24 | 0.60 | 0.55 | 0.53 | 0.57 | 0.58 | 0.50 | 0.55 | 0.61 | 0.62 |
| 25 | 0.31 | 0.49 | 0.28 | 0.31 | 0.29 | 0.26 | 0.54 | 0.43 | 0.49 |
| 26 | 0.53 | 0.49 | 0.47 | 0.51 | 0.56 | 0.45 | 0.55 | 0.58 | 0.57 |
| 27 | 0.68 | 0.68 | 0.72 | 0.70 | 0.70 | 0.71 | 0.70 | 0.73 | 0.70 |
| 28 | 0.72 | 0.72 | 0.73 | 0.73 | 0.73 | 0.74 | 0.75 | 0.75 | 0.75 |
| 29 | 0.62 | 0.60 | 0.63 | 0.63 | 0.61 | 0.61 | 0.62 | 0.67 | 0.64 |
| 30 | 0.65 | 0.64 | 0.63 | 0.63 | 0.64 | 0.64 | 0.63 | 0.68 | 0.65 |
| 31 | 0.62 | 0.61 | 0.65 | 0.65 | 0.64 | 0.65 | 0.64 | 0.68 | 0.63 |
| 32 | 0.64 | 0.62 | 0.58 | 0.59 | 0.64 | 0.54 | 0.59 | 0.65 | 0.67 |
| 33 | 0.23 | 0.42 | 0.28 | 0.30 | 0.23 | 0.26 | 0.49 | 0.45 | 0.41 |
| 34 | 0.68 | 0.68 | 0.71 | 0.71 | 0.72 | 0.68 | 0.67 | 0.74 | 0.73 |
| 35 | 0.78 | 0.77 | 0.79 | 0.79 | 0.79 | 0.79 | 0.78 | 0.80 | 0.80 |
| 36 | 0.64 | 0.62 | 0.54 | 0.62 | 0.64 | 0.57 | 0.63 | 0.68 | 0.65 |
| 37 | 0.60 | 0.55 | 0.52 | 0.62 | 0.61 | 0.43 | 0.58 | 0.64 | 0.62 |
| 38 | 0.74 | 0.74 | 0.76 | 0.77 | 0.77 | 0.77 | 0.76 | 0.80 | 0.78 |
| 39 | 0.60 | 0.70 | 0.68 | 0.68 | 0.68 | 0.71 | 0.62 | 0.70 | 0.70 |
| 40 | 0.75 | 0.71 | 0.69 | 0.73 | 0.74 | 0.67 | 0.70 | 0.77 | 0.77 |
| 41 | 0.77 | 0.79 | 0.80 | 0.79 | 0.78 | 0.79 | 0.77 | 0.82 | 0.79 |
| 42 | 0.77 | 0.77 | 0.79 | 0.78 | 0.79 | 0.78 | 0.78 | 0.81 | 0.80 |
| 43 | 0.77 | 0.78 | 0.79 | 0.78 | 0.79 | 0.78 | 0.77 | 0.81 | 0.79 |
| 44 | 0.39 | 0.40 | 0.26 | 0.39 | 0.34 | 0.36 | 0.34 | 0.49 | 0.30 |
| 45 | 0.70 | 0.63 | 0.66 | 0.65 | 0.70 | 0.60 | 0.64 | 0.73 | 0.74 |
| 46 | 0.70 | 0.72 | 0.69 | 0.63 | 0.74 | 0.68 | 0.69 | 0.73 | 0.70 |
| 47 | 0.82 | 0.80 | 0.82 | 0.79 | 0.81 | 0.79 | 0.83 | 0.81 | 0.83 |
| 48 | 0.85 | 0.84 | 0.85 | 0.86 | 0.86 | 0.85 | 0.85 | 0.86 | 0.87 |
| 49 | 0.73 | 0.66 | 0.67 | 0.68 | 0.71 | 0.60 | 0.68 | 0.76 | 0.65 |
| 50 | 0.56 | 0.67 | 0.68 | 0.67 | 0.61 | 0.68 | 0.59 | 0.73 | 0.64 |
| 51 | 0.74 | 0.70 | 0.75 | 0.74 | 0.73 | 0.71 | 0.72 | 0.77 | 0.73 |
| 52 | 0.68 | 0.69 | 0.68 | 0.71 | 0.70 | 0.59 | 0.61 | 0.76 | 0.70 |
| 53 | 0.81 | 0.81 | 0.81 | 0.80 | 0.80 | 0.80 | 0.78 | 0.85 | 0.81 |
| 54 | 0.60 | 0.63 | 0.60 | 0.61 | 0.66 | 0.60 | 0.58 | 0.68 | 0.64 |
| 55 | 0.78 | 0.78 | 0.73 | 0.77 | 0.78 | 0.68 | 0.75 | 0.81 | 0.80 |

|    |      |      |      |      |      |      |      |      |      |
|----|------|------|------|------|------|------|------|------|------|
| 1  |      |      |      |      |      |      |      |      |      |
| 2  | 0.73 | 0.69 | 0.75 | 0.77 | 0.74 | 0.75 | 0.74 | 0.81 | 0.76 |
| 3  | 0.75 | 0.74 | 0.71 | 0.72 | 0.73 | 0.66 | 0.68 | 0.78 | 0.77 |
| 4  | 0.74 | 0.74 | 0.79 | 0.72 | 0.75 | 0.69 | 0.77 | 0.78 | 0.74 |
| 5  | 0.58 | 0.57 | 0.62 | 0.62 | 0.71 | 0.56 | 0.57 | 0.73 | 0.63 |
| 6  | 0.88 | 0.86 | 0.84 | 0.85 | 0.87 | 0.82 | 0.85 | 0.88 | 0.89 |
| 7  | 0.85 | 0.84 | 0.88 | 0.84 | 0.87 | 0.83 | 0.87 | 0.87 | 0.86 |
| 8  | 0.80 | 0.81 | 0.80 | 0.87 | 0.84 | 0.84 | 0.82 | 0.88 | 0.84 |
| 9  | 0.80 | 0.85 | 0.83 | 0.85 | 0.82 | 0.86 | 0.82 | 0.88 | 0.84 |
| 10 | 0.80 | 0.85 | 0.83 | 0.85 | 0.82 | 0.86 | 0.82 | 0.88 | 0.84 |
| 11 | 0.87 | 0.87 | 0.88 | 0.87 | 0.88 | 0.85 | 0.87 | 0.89 | 0.89 |
| 12 | 0.89 | 0.89 | 0.87 | 0.91 | 0.85 | 0.90 | 0.87 | 0.92 | 0.90 |
| 13 | 0.71 | 0.72 | 0.71 | 0.76 | 0.64 | 0.66 | 0.72 | 0.82 | 0.71 |
| 14 | 0.63 | 0.64 | 0.71 | 0.71 | 0.71 | 0.71 | 0.66 | 0.79 | 0.69 |
| 15 | 0.84 | 0.83 | 0.80 | 0.85 | 0.86 | 0.85 | 0.83 | 0.79 | 0.81 |
| 16 | 0.89 | 0.84 | 0.89 | 0.89 | 0.89 | 0.88 | 0.86 | 0.88 | 0.84 |
| 17 | 0.89 | 0.84 | 0.89 | 0.89 | 0.89 | 0.88 | 0.86 | 0.88 | 0.84 |
| 18 | 0.93 | 0.92 | 0.89 | 0.92 | 0.92 | 0.87 | 0.90 | 0.93 | 0.92 |
| 19 | 0.95 | 0.95 | 0.95 | 0.96 | 0.95 | 0.95 | 0.95 | 0.96 | 0.96 |
| 20 | 0.97 | 0.96 | 0.95 | 0.96 | 0.95 | 0.96 | 0.95 | 0.97 | 0.97 |
| 21 |      |      |      |      |      |      |      |      |      |
| 22 |      |      |      |      |      |      |      |      |      |
| 23 |      |      |      |      |      |      |      |      |      |
| 24 |      |      |      |      |      |      |      |      |      |
| 25 |      |      |      |      |      |      |      |      |      |
| 26 |      |      |      |      |      |      |      |      |      |
| 27 |      |      |      |      |      |      |      |      |      |
| 28 |      |      |      |      |      |      |      |      |      |
| 29 |      |      |      |      |      |      |      |      |      |
| 30 |      |      |      |      |      |      |      |      |      |
| 31 |      |      |      |      |      |      |      |      |      |
| 32 |      |      |      |      |      |      |      |      |      |
| 33 |      |      |      |      |      |      |      |      |      |
| 34 |      |      |      |      |      |      |      |      |      |
| 35 |      |      |      |      |      |      |      |      |      |
| 36 |      |      |      |      |      |      |      |      |      |
| 37 |      |      |      |      |      |      |      |      |      |
| 38 |      |      |      |      |      |      |      |      |      |
| 39 |      |      |      |      |      |      |      |      |      |
| 40 |      |      |      |      |      |      |      |      |      |
| 41 |      |      |      |      |      |      |      |      |      |
| 42 |      |      |      |      |      |      |      |      |      |
| 43 |      |      |      |      |      |      |      |      |      |
| 44 |      |      |      |      |      |      |      |      |      |
| 45 |      |      |      |      |      |      |      |      |      |
| 46 |      |      |      |      |      |      |      |      |      |
| 47 |      |      |      |      |      |      |      |      |      |
| 48 |      |      |      |      |      |      |      |      |      |
| 49 |      |      |      |      |      |      |      |      |      |
| 50 |      |      |      |      |      |      |      |      |      |
| 51 |      |      |      |      |      |      |      |      |      |
| 52 |      |      |      |      |      |      |      |      |      |
| 53 |      |      |      |      |      |      |      |      |      |
| 54 |      |      |      |      |      |      |      |      |      |
| 55 |      |      |      |      |      |      |      |      |      |
| 56 |      |      |      |      |      |      |      |      |      |
| 57 |      |      |      |      |      |      |      |      |      |
| 58 |      |      |      |      |      |      |      |      |      |
| 59 |      |      |      |      |      |      |      |      |      |
| 60 |      |      |      |      |      |      |      |      |      |

1  
2  
3  
4  
5  
6  
7  
8  
9  
10  
11  
12  
13  
14  
15  
16  
17 740 743 748 750 765 766 770 781 801  
18  
19

|    | RWD  | RL4  | RN5  | RDU  | RBV  | RA7  | REF  | RAL  | RKB  |
|----|------|------|------|------|------|------|------|------|------|
| 20 |      |      |      |      |      |      |      |      |      |
| 21 |      |      |      |      |      |      |      |      |      |
| 22 |      |      |      |      |      |      |      |      |      |
| 23 | 0.68 | 0.69 | 0.70 | 0.69 | 0.70 | 0.70 | 0.67 | 0.71 | 0.71 |
| 24 | 0.69 | 0.69 | 0.70 | 0.68 | 0.70 | 0.70 | 0.69 | 0.70 | 0.71 |
| 25 | 0.55 | 0.57 | 0.57 | 0.53 | 0.62 | 0.58 | 0.55 | 0.58 | 0.61 |
| 26 | 0.48 | 0.40 | 0.36 | 0.28 | 0.43 | 0.47 | 0.43 | 0.39 | 0.41 |
| 27 | 0.52 | 0.50 | 0.50 | 0.51 | 0.55 | 0.53 | 0.48 | 0.58 | 0.54 |
| 28 | 0.73 | 0.71 | 0.72 | 0.72 | 0.71 | 0.71 | 0.70 | 0.74 | 0.72 |
| 29 | 0.75 | 0.75 | 0.75 | 0.75 | 0.76 | 0.75 | 0.75 | 0.76 | 0.76 |
| 30 | 0.67 | 0.63 | 0.67 | 0.66 | 0.69 | 0.69 | 0.66 | 0.71 | 0.68 |
| 31 | 0.63 | 0.67 | 0.68 | 0.65 | 0.69 | 0.66 | 0.68 | 0.68 | 0.69 |
| 32 | 0.68 | 0.64 | 0.67 | 0.66 | 0.64 | 0.68 | 0.65 | 0.71 | 0.65 |
| 33 | 0.62 | 0.63 | 0.62 | 0.58 | 0.65 | 0.64 | 0.61 | 0.64 | 0.66 |
| 34 | 0.39 | 0.38 | 0.36 | 0.29 | 0.39 | 0.46 | 0.36 | 0.36 | 0.37 |
| 35 | 0.73 | 0.70 | 0.72 | 0.72 | 0.71 | 0.72 | 0.68 | 0.76 | 0.72 |
| 36 | 0.80 | 0.80 | 0.80 | 0.80 | 0.81 | 0.81 | 0.79 | 0.81 | 0.80 |
| 37 | 0.61 | 0.62 | 0.55 | 0.60 | 0.69 | 0.64 | 0.62 | 0.62 | 0.71 |
| 38 | 0.57 | 0.57 | 0.53 | 0.53 | 0.57 | 0.56 | 0.56 | 0.59 | 0.63 |
| 39 | 0.79 | 0.78 | 0.79 | 0.77 | 0.77 | 0.78 | 0.77 | 0.81 | 0.79 |
| 40 | 0.72 | 0.71 | 0.69 | 0.65 | 0.69 | 0.74 | 0.66 | 0.66 | 0.71 |
| 41 | 0.72 | 0.74 | 0.71 | 0.70 | 0.70 | 0.73 | 0.69 | 0.74 | 0.76 |
| 42 | 0.81 | 0.79 | 0.81 | 0.81 | 0.82 | 0.82 | 0.78 | 0.82 | 0.82 |
| 43 | 0.81 | 0.80 | 0.79 | 0.79 | 0.81 | 0.81 | 0.80 | 0.81 | 0.81 |
| 44 | 0.81 | 0.80 | 0.78 | 0.79 | 0.80 | 0.80 | 0.78 | 0.81 | 0.81 |
| 45 | 0.31 | 0.30 | 0.34 | 0.41 | 0.34 | 0.40 | 0.39 | 0.46 | 0.30 |
| 46 | 0.71 | 0.71 | 0.61 | 0.67 | 0.66 | 0.70 | 0.65 | 0.69 | 0.72 |
| 47 | 0.70 | 0.74 | 0.73 | 0.69 | 0.71 | 0.70 | 0.73 | 0.72 | 0.72 |
| 48 | 0.81 | 0.81 | 0.80 | 0.81 | 0.82 | 0.82 | 0.83 | 0.82 | 0.84 |
| 49 | 0.87 | 0.86 | 0.86 | 0.86 | 0.87 | 0.87 | 0.86 | 0.87 | 0.87 |
| 50 | 0.67 | 0.71 | 0.59 | 0.64 | 0.68 | 0.64 | 0.61 | 0.69 | 0.73 |
| 51 | 0.74 | 0.70 | 0.70 | 0.65 | 0.66 | 0.73 | 0.69 | 0.66 | 0.63 |
| 52 | 0.77 | 0.73 | 0.74 | 0.75 | 0.74 | 0.70 | 0.75 | 0.79 | 0.71 |
| 53 | 0.70 | 0.71 | 0.69 | 0.70 | 0.68 | 0.68 | 0.64 | 0.70 | 0.69 |
| 54 | 0.81 | 0.84 | 0.82 | 0.80 | 0.84 | 0.83 | 0.81 | 0.85 | 0.83 |
| 55 | 0.67 | 0.59 | 0.65 | 0.63 | 0.53 | 0.59 | 0.50 | 0.69 | 0.63 |
| 56 | 0.76 | 0.79 | 0.69 | 0.75 | 0.78 | 0.78 | 0.72 | 0.80 | 0.79 |

|    |      |      |      |      |      |      |      |      |      |
|----|------|------|------|------|------|------|------|------|------|
| 1  |      |      |      |      |      |      |      |      |      |
| 2  | 0.73 | 0.72 | 0.66 | 0.74 | 0.74 | 0.79 | 0.69 | 0.77 | 0.75 |
| 3  | 0.73 | 0.67 | 0.73 | 0.78 | 0.77 | 0.75 | 0.76 | 0.79 | 0.75 |
| 4  | 0.73 | 0.74 | 0.67 | 0.74 | 0.79 | 0.74 | 0.75 | 0.76 | 0.77 |
| 5  | 0.62 | 0.62 | 0.61 | 0.55 | 0.45 | 0.54 | 0.48 | 0.66 | 0.58 |
| 6  | 0.86 | 0.87 | 0.85 | 0.85 | 0.87 | 0.86 | 0.85 | 0.86 | 0.88 |
| 7  | 0.86 | 0.86 | 0.83 | 0.86 | 0.89 | 0.86 | 0.87 | 0.87 | 0.88 |
| 8  | 0.89 | 0.82 | 0.85 | 0.85 | 0.85 | 0.87 | 0.84 | 0.87 | 0.84 |
| 9  | 0.82 | 0.84 | 0.80 | 0.85 | 0.85 | 0.87 | 0.77 | 0.86 | 0.82 |
| 10 | 0.89 | 0.89 | 0.87 | 0.87 | 0.89 | 0.88 | 0.87 | 0.88 | 0.89 |
| 11 | 0.91 | 0.88 | 0.92 | 0.92 | 0.92 | 0.92 | 0.91 | 0.93 | 0.92 |
| 12 | 0.75 | 0.62 | 0.74 | 0.67 | 0.76 | 0.70 | 0.64 | 0.78 | 0.74 |
| 13 | 0.81 | 0.75 | 0.73 | 0.73 | 0.70 | 0.73 | 0.64 | 0.71 | 0.71 |
| 14 | 0.89 | 0.87 | 0.85 | 0.85 | 0.88 | 0.80 | 0.83 | 0.87 | 0.83 |
| 15 | 0.91 | 0.90 | 0.90 | 0.89 | 0.88 | 0.87 | 0.89 | 0.90 | 0.89 |
| 16 | 0.91 | 0.92 | 0.91 | 0.92 | 0.93 | 0.92 | 0.88 | 0.93 | 0.93 |
| 17 | 0.95 | 0.96 | 0.96 | 0.96 | 0.96 | 0.96 | 0.96 | 0.96 | 0.96 |
| 18 | 0.97 | 0.96 | 0.96 | 0.95 | 0.97 | 0.97 | 0.97 | 0.97 | 0.97 |
| 19 |      |      |      |      |      |      |      |      |      |
| 20 |      |      |      |      |      |      |      |      |      |
| 21 |      |      |      |      |      |      |      |      |      |
| 22 |      |      |      |      |      |      |      |      |      |
| 23 |      |      |      |      |      |      |      |      |      |
| 24 |      |      |      |      |      |      |      |      |      |
| 25 |      |      |      |      |      |      |      |      |      |
| 26 |      |      |      |      |      |      |      |      |      |
| 27 |      |      |      |      |      |      |      |      |      |
| 28 |      |      |      |      |      |      |      |      |      |
| 29 |      |      |      |      |      |      |      |      |      |
| 30 |      |      |      |      |      |      |      |      |      |
| 31 |      |      |      |      |      |      |      |      |      |
| 32 |      |      |      |      |      |      |      |      |      |
| 33 |      |      |      |      |      |      |      |      |      |
| 34 |      |      |      |      |      |      |      |      |      |
| 35 |      |      |      |      |      |      |      |      |      |
| 36 |      |      |      |      |      |      |      |      |      |
| 37 |      |      |      |      |      |      |      |      |      |
| 38 |      |      |      |      |      |      |      |      |      |
| 39 |      |      |      |      |      |      |      |      |      |
| 40 |      |      |      |      |      |      |      |      |      |
| 41 |      |      |      |      |      |      |      |      |      |
| 42 |      |      |      |      |      |      |      |      |      |
| 43 |      |      |      |      |      |      |      |      |      |
| 44 |      |      |      |      |      |      |      |      |      |
| 45 |      |      |      |      |      |      |      |      |      |
| 46 |      |      |      |      |      |      |      |      |      |
| 47 |      |      |      |      |      |      |      |      |      |
| 48 |      |      |      |      |      |      |      |      |      |
| 49 |      |      |      |      |      |      |      |      |      |
| 50 |      |      |      |      |      |      |      |      |      |
| 51 |      |      |      |      |      |      |      |      |      |
| 52 |      |      |      |      |      |      |      |      |      |
| 53 |      |      |      |      |      |      |      |      |      |
| 54 |      |      |      |      |      |      |      |      |      |
| 55 |      |      |      |      |      |      |      |      |      |
| 56 |      |      |      |      |      |      |      |      |      |
| 57 |      |      |      |      |      |      |      |      |      |
| 58 |      |      |      |      |      |      |      |      |      |
| 59 |      |      |      |      |      |      |      |      |      |
| 60 |      |      |      |      |      |      |      |      |      |



1  
2  
3  
4  
5  
6  
7  
8  
9  
10  
11  
12  
13  
14  
15  
16  
17 819 827 845 861 900 923 938 963 974  
18  
19

|    | RTR  | RJZ  | RHM  | RTG  | R1H  | RK9  | RXW  | RR8  | RWP  |
|----|------|------|------|------|------|------|------|------|------|
| 20 |      |      |      |      |      |      |      |      |      |
| 21 |      |      |      |      |      |      |      |      |      |
| 22 |      |      |      |      |      |      |      |      |      |
| 23 | 0.71 | 0.72 | 0.72 | 0.72 | 0.75 | 0.72 | 0.74 | 0.74 | 0.74 |
| 24 | 0.71 | 0.71 | 0.73 | 0.72 | 0.73 | 0.73 | 0.74 | 0.74 | 0.74 |
| 25 | 0.61 | 0.61 | 0.65 | 0.63 | 0.63 | 0.62 | 0.61 | 0.68 | 0.60 |
| 26 | 0.45 | 0.36 | 0.44 | 0.47 | 0.49 | 0.47 | 0.48 | 0.53 | 0.45 |
| 27 | 0.56 | 0.54 | 0.63 | 0.58 | 0.60 | 0.62 | 0.59 | 0.62 | 0.55 |
| 28 | 0.73 | 0.74 | 0.75 | 0.75 | 0.77 | 0.75 | 0.77 | 0.75 | 0.77 |
| 29 | 0.77 | 0.77 | 0.77 | 0.77 | 0.79 | 0.78 | 0.79 | 0.79 | 0.80 |
| 30 | 0.69 | 0.70 | 0.69 | 0.66 | 0.74 | 0.69 | 0.70 | 0.70 | 0.71 |
| 31 | 0.72 | 0.69 | 0.69 | 0.69 | 0.72 | 0.72 | 0.71 | 0.71 | 0.74 |
| 32 | 0.66 | 0.71 | 0.70 | 0.69 | 0.75 | 0.70 | 0.72 | 0.67 | 0.72 |
| 33 | 0.66 | 0.67 | 0.72 | 0.67 | 0.68 | 0.68 | 0.68 | 0.70 | 0.67 |
| 34 | 0.34 | 0.35 | 0.43 | 0.42 | 0.42 | 0.35 | 0.50 | 0.46 | 0.37 |
| 35 | 0.74 | 0.73 | 0.74 | 0.73 | 0.78 | 0.75 | 0.77 | 0.75 | 0.77 |
| 36 | 0.81 | 0.82 | 0.82 | 0.82 | 0.84 | 0.82 | 0.84 | 0.84 | 0.84 |
| 37 | 0.62 | 0.66 | 0.70 | 0.62 | 0.68 | 0.69 | 0.69 | 0.69 | 0.64 |
| 38 | 0.56 | 0.64 | 0.65 | 0.63 | 0.67 | 0.68 | 0.64 | 0.70 | 0.65 |
| 39 | 0.79 | 0.81 | 0.79 | 0.81 | 0.83 | 0.81 | 0.82 | 0.80 | 0.81 |
| 40 | 0.73 | 0.68 | 0.70 | 0.72 | 0.78 | 0.75 | 0.78 | 0.71 | 0.75 |
| 41 | 0.74 | 0.76 | 0.79 | 0.76 | 0.78 | 0.78 | 0.75 | 0.81 | 0.76 |
| 42 | 0.82 | 0.84 | 0.83 | 0.82 | 0.85 | 0.83 | 0.84 | 0.85 | 0.85 |
| 43 | 0.81 | 0.80 | 0.82 | 0.82 | 0.83 | 0.82 | 0.84 | 0.84 | 0.84 |
| 44 | 0.81 | 0.81 | 0.81 | 0.82 | 0.85 | 0.82 | 0.83 | 0.84 | 0.83 |
| 45 | 0.38 | 0.42 | 0.48 | 0.36 | 0.46 | 0.36 | 0.31 | 0.42 | 0.42 |
| 46 | 0.71 | 0.75 | 0.72 | 0.74 | 0.76 | 0.74 | 0.74 | 0.76 | 0.72 |
| 47 | 0.74 | 0.73 | 0.77 | 0.70 | 0.80 | 0.78 | 0.78 | 0.76 | 0.79 |
| 48 | 0.83 | 0.83 | 0.82 | 0.85 | 0.85 | 0.84 | 0.86 | 0.87 | 0.86 |
| 49 | 0.87 | 0.88 | 0.88 | 0.88 | 0.89 | 0.89 | 0.89 | 0.89 | 0.89 |
| 50 | 0.72 | 0.72 | 0.75 | 0.72 | 0.76 | 0.71 | 0.69 | 0.77 | 0.73 |
| 51 | 0.71 | 0.65 | 0.68 | 0.72 | 0.79 | 0.70 | 0.76 | 0.70 | 0.75 |
| 52 | 0.77 | 0.78 | 0.79 | 0.75 | 0.83 | 0.75 | 0.79 | 0.74 | 0.81 |
| 53 | 0.75 | 0.71 | 0.76 | 0.69 | 0.77 | 0.78 | 0.71 | 0.72 | 0.73 |
| 54 | 0.83 | 0.84 | 0.84 | 0.81 | 0.88 | 0.84 | 0.85 | 0.85 | 0.86 |
| 55 | 0.65 | 0.62 | 0.61 | 0.59 | 0.73 | 0.65 | 0.66 | 0.69 | 0.63 |
| 56 | 0.79 | 0.81 | 0.81 | 0.79 | 0.83 | 0.80 | 0.79 | 0.83 | 0.83 |

|    |      |      |      |      |      |      |      |      |      |
|----|------|------|------|------|------|------|------|------|------|
| 1  |      |      |      |      |      |      |      |      |      |
| 2  | 0.70 | 0.78 | 0.77 | 0.77 | 0.85 | 0.75 | 0.79 | 0.79 | 0.74 |
| 3  | 0.76 | 0.77 | 0.79 | 0.79 | 0.83 | 0.79 | 0.77 | 0.80 | 0.72 |
| 4  | 0.79 | 0.75 | 0.79 | 0.79 | 0.81 | 0.75 | 0.79 | 0.83 | 0.81 |
| 5  | 0.67 | 0.68 | 0.63 | 0.60 | 0.71 | 0.68 | 0.62 | 0.65 | 0.65 |
| 6  | 0.88 | 0.87 | 0.90 | 0.88 | 0.89 | 0.89 | 0.88 | 0.91 | 0.89 |
| 7  | 0.88 | 0.88 | 0.88 | 0.89 | 0.89 | 0.87 | 0.89 | 0.90 | 0.90 |
| 8  | 0.84 | 0.88 | 0.88 | 0.82 | 0.90 | 0.88 | 0.88 | 0.85 | 0.86 |
| 9  | 0.80 | 0.87 | 0.87 | 0.85 | 0.90 | 0.87 | 0.89 | 0.89 | 0.87 |
| 10 | 0.80 | 0.87 | 0.87 | 0.85 | 0.90 | 0.87 | 0.89 | 0.89 | 0.87 |
| 11 | 0.89 | 0.89 | 0.88 | 0.89 | 0.92 | 0.89 | 0.91 | 0.90 | 0.90 |
| 12 | 0.91 | 0.92 | 0.93 | 0.92 | 0.93 | 0.89 | 0.92 | 0.94 | 0.92 |
| 13 | 0.65 | 0.80 | 0.80 | 0.65 | 0.76 | 0.78 | 0.70 | 0.71 | 0.75 |
| 14 | 0.70 | 0.80 | 0.74 | 0.70 | 0.79 | 0.72 | 0.80 | 0.68 | 0.62 |
| 15 | 0.87 | 0.87 | 0.87 | 0.87 | 0.86 | 0.86 | 0.87 | 0.82 | 0.92 |
| 16 | 0.87 | 0.87 | 0.87 | 0.87 | 0.86 | 0.86 | 0.87 | 0.82 | 0.92 |
| 17 | 0.90 | 0.90 | 0.91 | 0.90 | 0.93 | 0.88 | 0.90 | 0.87 | 0.92 |
| 18 | 0.91 | 0.93 | 0.94 | 0.91 | 0.93 | 0.93 | 0.92 | 0.94 | 0.92 |
| 19 | 0.96 | 0.96 | 0.96 | 0.96 | 0.97 | 0.96 | 0.96 | 0.96 | 0.96 |
| 20 | 0.97 | 0.97 | 0.97 | 0.97 | 0.97 | 0.97 | 0.97 | 0.98 | 0.97 |
| 21 |      |      |      |      |      |      |      |      |      |
| 22 |      |      |      |      |      |      |      |      |      |
| 23 |      |      |      |      |      |      |      |      |      |
| 24 |      |      |      |      |      |      |      |      |      |
| 25 |      |      |      |      |      |      |      |      |      |
| 26 |      |      |      |      |      |      |      |      |      |
| 27 |      |      |      |      |      |      |      |      |      |
| 28 |      |      |      |      |      |      |      |      |      |
| 29 |      |      |      |      |      |      |      |      |      |
| 30 |      |      |      |      |      |      |      |      |      |
| 31 |      |      |      |      |      |      |      |      |      |
| 32 |      |      |      |      |      |      |      |      |      |
| 33 |      |      |      |      |      |      |      |      |      |
| 34 |      |      |      |      |      |      |      |      |      |
| 35 |      |      |      |      |      |      |      |      |      |
| 36 |      |      |      |      |      |      |      |      |      |
| 37 |      |      |      |      |      |      |      |      |      |
| 38 |      |      |      |      |      |      |      |      |      |
| 39 |      |      |      |      |      |      |      |      |      |
| 40 |      |      |      |      |      |      |      |      |      |
| 41 |      |      |      |      |      |      |      |      |      |
| 42 |      |      |      |      |      |      |      |      |      |
| 43 |      |      |      |      |      |      |      |      |      |
| 44 |      |      |      |      |      |      |      |      |      |
| 45 |      |      |      |      |      |      |      |      |      |
| 46 |      |      |      |      |      |      |      |      |      |
| 47 |      |      |      |      |      |      |      |      |      |
| 48 |      |      |      |      |      |      |      |      |      |
| 49 |      |      |      |      |      |      |      |      |      |
| 50 |      |      |      |      |      |      |      |      |      |
| 51 |      |      |      |      |      |      |      |      |      |
| 52 |      |      |      |      |      |      |      |      |      |
| 53 |      |      |      |      |      |      |      |      |      |
| 54 |      |      |      |      |      |      |      |      |      |
| 55 |      |      |      |      |      |      |      |      |      |
| 56 |      |      |      |      |      |      |      |      |      |
| 57 |      |      |      |      |      |      |      |      |      |
| 58 |      |      |      |      |      |      |      |      |      |
| 59 |      |      |      |      |      |      |      |      |      |
| 60 |      |      |      |      |      |      |      |      |      |

1  
2  
3  
4  
5  
6  
7  
8  
9  
10  
11  
12  
13  
14  
15  
16  
17 976 982 992 1024 1053 1056 1062 1067 1225  
18  
19

|    | RWF  | RJE  | RGT  | RWA  | RJ1  | RRV  | RH8  | RVV  | RM1  |
|----|------|------|------|------|------|------|------|------|------|
| 20 |      |      |      |      |      |      |      |      |      |
| 21 |      |      |      |      |      |      |      |      |      |
| 22 |      |      |      |      |      |      |      |      |      |
| 23 | 0.74 | 0.74 | 0.74 | 0.75 | 0.76 | 0.78 | 0.74 | 0.75 | 0.76 |
| 24 | 0.73 | 0.76 | 0.75 | 0.76 | 0.76 | 0.75 | 0.74 | 0.76 | 0.78 |
| 25 | 0.57 | 0.65 | 0.66 | 0.69 | 0.65 | 0.67 | 0.63 | 0.62 | 0.66 |
| 26 | 0.52 | 0.50 | 0.49 | 0.50 | 0.50 | 0.44 | 0.48 | 0.46 | 0.51 |
| 27 | 0.54 | 0.60 | 0.59 | 0.64 | 0.62 | 0.63 | 0.57 | 0.64 | 0.66 |
| 28 | 0.75 | 0.77 | 0.77 | 0.77 | 0.78 | 0.80 | 0.77 | 0.79 | 0.81 |
| 29 | 0.80 | 0.80 | 0.80 | 0.80 | 0.81 | 0.81 | 0.80 | 0.81 | 0.83 |
| 30 | 0.72 | 0.70 | 0.73 | 0.71 | 0.74 | 0.76 | 0.71 | 0.74 | 0.76 |
| 31 | 0.70 | 0.71 | 0.75 | 0.73 | 0.75 | 0.77 | 0.74 | 0.71 | 0.76 |
| 32 | 0.71 | 0.71 | 0.70 | 0.72 | 0.73 | 0.76 | 0.70 | 0.75 | 0.75 |
| 33 | 0.65 | 0.71 | 0.70 | 0.71 | 0.70 | 0.71 | 0.66 | 0.69 | 0.72 |
| 34 | 0.42 | 0.43 | 0.51 | 0.41 | 0.44 | 0.44 | 0.47 | 0.42 | 0.47 |
| 35 | 0.75 | 0.77 | 0.77 | 0.78 | 0.80 | 0.79 | 0.75 | 0.80 | 0.79 |
| 36 | 0.84 | 0.84 | 0.84 | 0.84 | 0.85 | 0.85 | 0.84 | 0.86 | 0.87 |
| 37 | 0.64 | 0.67 | 0.70 | 0.69 | 0.70 | 0.71 | 0.67 | 0.70 | 0.68 |
| 38 | 0.53 | 0.66 | 0.63 | 0.68 | 0.65 | 0.70 | 0.61 | 0.68 | 0.67 |
| 39 | 0.80 | 0.83 | 0.81 | 0.83 | 0.83 | 0.84 | 0.81 | 0.84 | 0.85 |
| 40 | 0.77 | 0.78 | 0.74 | 0.76 | 0.77 | 0.77 | 0.74 | 0.77 | 0.79 |
| 41 | 0.72 | 0.77 | 0.80 | 0.81 | 0.78 | 0.80 | 0.74 | 0.77 | 0.81 |
| 42 | 0.85 | 0.84 | 0.85 | 0.86 | 0.86 | 0.87 | 0.84 | 0.86 | 0.87 |
| 43 | 0.84 | 0.85 | 0.84 | 0.83 | 0.86 | 0.85 | 0.84 | 0.85 | 0.86 |
| 44 | 0.83 | 0.84 | 0.83 | 0.83 | 0.85 | 0.86 | 0.82 | 0.85 | 0.86 |
| 45 | 0.34 | 0.45 | 0.46 | 0.50 | 0.37 | 0.50 | 0.27 | 0.53 | 0.47 |
| 46 | 0.71 | 0.76 | 0.75 | 0.77 | 0.75 | 0.77 | 0.71 | 0.73 | 0.76 |
| 47 | 0.72 | 0.75 | 0.74 | 0.79 | 0.74 | 0.81 | 0.72 | 0.82 | 0.81 |
| 48 | 0.86 | 0.88 | 0.85 | 0.87 | 0.87 | 0.87 | 0.86 | 0.86 | 0.88 |
| 49 | 0.89 | 0.89 | 0.89 | 0.90 | 0.90 | 0.90 | 0.89 | 0.90 | 0.91 |
| 50 | 0.64 | 0.76 | 0.75 | 0.77 | 0.77 | 0.78 | 0.69 | 0.74 | 0.78 |
| 51 | 0.75 | 0.76 | 0.75 | 0.75 | 0.73 | 0.75 | 0.72 | 0.78 | 0.78 |
| 52 | 0.80 | 0.81 | 0.80 | 0.80 | 0.82 | 0.82 | 0.72 | 0.82 | 0.82 |
| 53 | 0.72 | 0.78 | 0.76 | 0.77 | 0.71 | 0.77 | 0.75 | 0.73 | 0.77 |
| 54 | 0.84 | 0.85 | 0.85 | 0.87 | 0.87 | 0.90 | 0.84 | 0.87 | 0.88 |
| 55 | 0.63 | 0.68 | 0.64 | 0.76 | 0.69 | 0.66 | 0.58 | 0.75 | 0.73 |
| 56 | 0.78 | 0.82 | 0.81 | 0.85 | 0.84 | 0.84 | 0.80 | 0.82 | 0.82 |

|    |      |      |      |      |      |      |      |      |      |
|----|------|------|------|------|------|------|------|------|------|
| 1  |      |      |      |      |      |      |      |      |      |
| 2  | 0.75 | 0.81 | 0.76 | 0.76 | 0.83 | 0.83 | 0.74 | 0.80 | 0.82 |
| 3  | 0.77 | 0.77 | 0.79 | 0.76 | 0.83 | 0.84 | 0.74 | 0.81 | 0.82 |
| 4  | 0.76 | 0.82 | 0.79 | 0.79 | 0.85 | 0.82 | 0.80 | 0.80 | 0.82 |
| 5  | 0.64 | 0.70 | 0.64 | 0.66 | 0.63 | 0.73 | 0.56 | 0.69 | 0.71 |
| 6  | 0.85 | 0.90 | 0.90 | 0.92 | 0.88 | 0.90 | 0.87 | 0.89 | 0.91 |
| 7  | 0.88 | 0.92 | 0.89 | 0.89 | 0.91 | 0.91 | 0.90 | 0.91 | 0.91 |
| 8  | 0.87 | 0.88 | 0.86 | 0.88 | 0.89 | 0.89 | 0.86 | 0.91 | 0.86 |
| 9  | 0.84 | 0.88 | 0.89 | 0.86 | 0.90 | 0.91 | 0.85 | 0.91 | 0.91 |
| 10 | 0.84 | 0.88 | 0.89 | 0.86 | 0.90 | 0.91 | 0.85 | 0.91 | 0.91 |
| 11 | 0.90 | 0.91 | 0.90 | 0.92 | 0.92 | 0.92 | 0.90 | 0.91 | 0.92 |
| 12 | 0.94 | 0.92 | 0.94 | 0.94 | 0.94 | 0.94 | 0.94 | 0.95 | 0.95 |
| 13 | 0.76 | 0.74 | 0.71 | 0.77 | 0.81 | 0.83 | 0.69 | 0.75 | 0.81 |
| 14 | 0.78 | 0.79 | 0.75 | 0.69 | 0.77 | 0.77 | 0.66 | 0.83 | 0.66 |
| 15 | 0.91 | 0.87 | 0.83 | 0.91 | 0.88 | 0.84 | 0.89 | 0.92 | 0.87 |
| 16 | 0.90 | 0.91 | 0.91 | 0.92 | 0.92 | 0.91 | 0.82 | 0.93 | 0.91 |
| 17 | 0.90 | 0.91 | 0.91 | 0.92 | 0.92 | 0.91 | 0.82 | 0.93 | 0.91 |
| 18 | 0.92 | 0.94 | 0.94 | 0.94 | 0.94 | 0.94 | 0.92 | 0.94 | 0.94 |
| 19 | 0.96 | 0.97 | 0.97 | 0.97 | 0.97 | 0.97 | 0.96 | 0.97 | 0.97 |
| 20 | 0.97 | 0.97 | 0.98 | 0.97 | 0.98 | 0.98 | 0.97 | 0.97 | 0.97 |
| 21 |      |      |      |      |      |      |      |      |      |
| 22 |      |      |      |      |      |      |      |      |      |
| 23 |      |      |      |      |      |      |      |      |      |
| 24 |      |      |      |      |      |      |      |      |      |
| 25 |      |      |      |      |      |      |      |      |      |
| 26 |      |      |      |      |      |      |      |      |      |
| 27 |      |      |      |      |      |      |      |      |      |
| 28 |      |      |      |      |      |      |      |      |      |
| 29 |      |      |      |      |      |      |      |      |      |
| 30 |      |      |      |      |      |      |      |      |      |
| 31 |      |      |      |      |      |      |      |      |      |
| 32 |      |      |      |      |      |      |      |      |      |
| 33 |      |      |      |      |      |      |      |      |      |
| 34 |      |      |      |      |      |      |      |      |      |
| 35 |      |      |      |      |      |      |      |      |      |
| 36 |      |      |      |      |      |      |      |      |      |
| 37 |      |      |      |      |      |      |      |      |      |
| 38 |      |      |      |      |      |      |      |      |      |
| 39 |      |      |      |      |      |      |      |      |      |
| 40 |      |      |      |      |      |      |      |      |      |
| 41 |      |      |      |      |      |      |      |      |      |
| 42 |      |      |      |      |      |      |      |      |      |
| 43 |      |      |      |      |      |      |      |      |      |
| 44 |      |      |      |      |      |      |      |      |      |
| 45 |      |      |      |      |      |      |      |      |      |
| 46 |      |      |      |      |      |      |      |      |      |
| 47 |      |      |      |      |      |      |      |      |      |
| 48 |      |      |      |      |      |      |      |      |      |
| 49 |      |      |      |      |      |      |      |      |      |
| 50 |      |      |      |      |      |      |      |      |      |
| 51 |      |      |      |      |      |      |      |      |      |
| 52 |      |      |      |      |      |      |      |      |      |
| 53 |      |      |      |      |      |      |      |      |      |
| 54 |      |      |      |      |      |      |      |      |      |
| 55 |      |      |      |      |      |      |      |      |      |
| 56 |      |      |      |      |      |      |      |      |      |
| 57 |      |      |      |      |      |      |      |      |      |
| 58 |      |      |      |      |      |      |      |      |      |
| 59 |      |      |      |      |      |      |      |      |      |
| 60 |      |      |      |      |      |      |      |      |      |

1  
2  
3  
4  
5  
6  
7  
8  
9  
10  
11  
12  
13  
14  
15  
16  
17 1324 1344 1437 1451 1513 1972  
18  
19

|    | RTD  | RTE  | RWE  | RTH  | RHQ  | RPY  |
|----|------|------|------|------|------|------|
| 20 |      |      |      |      |      |      |
| 21 |      |      |      |      |      |      |
| 22 |      |      |      |      |      |      |
| 23 | 0.78 | 0.79 | 0.82 | 0.81 | 0.81 | 0.86 |
| 24 | 0.79 | 0.80 | 0.81 | 0.80 | 0.82 | 0.85 |
| 25 | 0.73 | 0.67 | 0.74 | 0.71 | 0.73 | 0.72 |
| 26 | 0.54 | 0.57 | 0.61 | 0.63 | 0.59 | 0.67 |
| 27 | 0.67 | 0.63 | 0.68 | 0.68 | 0.69 | 0.64 |
| 28 | 0.81 | 0.82 | 0.84 | 0.83 | 0.82 | 0.88 |
| 29 | 0.84 | 0.84 | 0.85 | 0.85 | 0.86 | 0.89 |
| 30 | 0.75 | 0.77 | 0.81 | 0.80 | 0.81 | 0.86 |
| 31 | 0.77 | 0.77 | 0.80 | 0.79 | 0.80 | 0.85 |
| 32 | 0.75 | 0.78 | 0.80 | 0.79 | 0.78 | 0.86 |
| 33 | 0.73 | 0.72 | 0.79 | 0.75 | 0.77 | 0.73 |
| 34 | 0.48 | 0.53 | 0.55 | 0.60 | 0.48 | 0.57 |
| 35 | 0.79 | 0.80 | 0.84 | 0.83 | 0.83 | 0.86 |
| 36 | 0.87 | 0.87 | 0.89 | 0.88 | 0.89 | 0.91 |
| 37 | 0.74 | 0.72 | 0.78 | 0.70 | 0.78 | 0.76 |
| 38 | 0.71 | 0.65 | 0.77 | 0.69 | 0.74 | 0.65 |
| 39 | 0.83 | 0.86 | 0.88 | 0.86 | 0.87 | 0.90 |
| 40 | 0.76 | 0.82 | 0.83 | 0.79 | 0.81 | 0.86 |
| 41 | 0.82 | 0.81 | 0.85 | 0.83 | 0.83 | 0.81 |
| 42 | 0.88 | 0.89 | 0.90 | 0.88 | 0.90 | 0.92 |
| 43 | 0.88 | 0.87 | 0.90 | 0.88 | 0.89 | 0.92 |
| 44 | 0.87 | 0.87 | 0.89 | 0.88 | 0.89 | 0.91 |
| 45 | 0.56 | 0.41 | 0.54 | 0.54 | 0.44 | 0.43 |
| 46 | 0.74 | 0.75 | 0.84 | 0.78 | 0.80 | 0.78 |
| 47 | 0.81 | 0.81 | 0.86 | 0.83 | 0.81 | 0.84 |
| 48 | 0.89 | 0.87 | 0.89 | 0.90 | 0.91 | 0.91 |
| 49 | 0.91 | 0.92 | 0.92 | 0.92 | 0.93 | 0.95 |
| 50 | 0.79 | 0.71 | 0.83 | 0.79 | 0.82 | 0.74 |
| 51 | 0.72 | 0.79 | 0.83 | 0.78 | 0.77 | 0.83 |
| 52 | 0.83 | 0.83 | 0.87 | 0.83 | 0.85 | 0.90 |
| 53 | 0.81 | 0.79 | 0.83 | 0.77 | 0.80 | 0.78 |
| 54 | 0.89 | 0.89 | 0.90 | 0.90 | 0.90 | 0.94 |
| 55 | 0.67 | 0.72 | 0.77 | 0.76 | 0.76 | 0.68 |
| 56 | 0.85 | 0.83 | 0.89 | 0.86 | 0.87 | 0.85 |

|    |      |      |      |      |      |      |
|----|------|------|------|------|------|------|
| 1  |      |      |      |      |      |      |
| 2  | 0.83 | 0.81 | 0.85 | 0.82 | 0.85 | 0.90 |
| 3  | 0.84 | 0.82 | 0.86 | 0.86 | 0.86 | 0.90 |
| 4  | 0.87 | 0.83 | 0.87 | 0.84 | 0.88 | 0.88 |
| 5  | 0.74 | 0.74 | 0.76 | 0.69 | 0.70 | 0.62 |
| 6  | 0.92 | 0.91 | 0.93 | 0.91 | 0.92 | 0.90 |
| 7  | 0.93 | 0.92 | 0.93 | 0.92 | 0.94 | 0.95 |
| 8  | 0.90 | 0.90 | 0.92 | 0.92 | 0.91 | 0.92 |
| 9  | 0.88 | 0.90 | 0.90 | 0.91 | 0.91 | 0.95 |
| 10 | 0.88 | 0.90 | 0.90 | 0.91 | 0.91 | 0.95 |
| 11 | 0.93 | 0.92 | 0.94 | 0.92 | 0.94 | 0.95 |
| 12 | 0.95 | 0.95 | 0.95 | 0.96 | 0.96 | 0.96 |
| 13 | 0.76 | 0.85 | 0.75 | 0.81 | 0.86 | 0.82 |
| 14 | 0.76 | 0.76 | 0.85 | 0.81 | 0.86 | 0.85 |
| 15 | 0.92 | 0.94 | 0.93 | 0.93 | 0.91 | 0.91 |
| 16 | 0.94 | 0.92 | 0.95 | 0.92 | 0.93 | 0.96 |
| 17 | 0.94 | 0.93 | 0.95 | 0.95 | 0.96 | 0.96 |
| 18 | 0.97 | 0.98 | 0.98 | 0.98 | 0.98 | 0.98 |
| 19 | 0.97 | 0.98 | 0.98 | 0.98 | 0.98 | 0.98 |
| 20 | 0.98 | 0.98 | 0.98 | 0.98 | 0.98 | 0.99 |
| 21 |      |      |      |      |      |      |
| 22 |      |      |      |      |      |      |
| 23 |      |      |      |      |      |      |
| 24 |      |      |      |      |      |      |
| 25 |      |      |      |      |      |      |
| 26 |      |      |      |      |      |      |
| 27 |      |      |      |      |      |      |
| 28 |      |      |      |      |      |      |
| 29 |      |      |      |      |      |      |
| 30 |      |      |      |      |      |      |
| 31 |      |      |      |      |      |      |
| 32 |      |      |      |      |      |      |
| 33 |      |      |      |      |      |      |
| 34 |      |      |      |      |      |      |
| 35 |      |      |      |      |      |      |
| 36 |      |      |      |      |      |      |
| 37 |      |      |      |      |      |      |
| 38 |      |      |      |      |      |      |
| 39 |      |      |      |      |      |      |
| 40 |      |      |      |      |      |      |
| 41 |      |      |      |      |      |      |
| 42 |      |      |      |      |      |      |
| 43 |      |      |      |      |      |      |
| 44 |      |      |      |      |      |      |
| 45 |      |      |      |      |      |      |
| 46 |      |      |      |      |      |      |
| 47 |      |      |      |      |      |      |
| 48 |      |      |      |      |      |      |
| 49 |      |      |      |      |      |      |
| 50 |      |      |      |      |      |      |
| 51 |      |      |      |      |      |      |
| 52 |      |      |      |      |      |      |
| 53 |      |      |      |      |      |      |
| 54 |      |      |      |      |      |      |
| 55 |      |      |      |      |      |      |
| 56 |      |      |      |      |      |      |
| 57 |      |      |      |      |      |      |
| 58 |      |      |      |      |      |      |
| 59 |      |      |      |      |      |      |
| 60 |      |      |      |      |      |      |

STROBE Statement—Checklist of items that should be included in reports of *cross-sectional studies*

|                              | Item No                                                                            | Recommendation                                                                                                                                                                                               | Page No |
|------------------------------|------------------------------------------------------------------------------------|--------------------------------------------------------------------------------------------------------------------------------------------------------------------------------------------------------------|---------|
| <b>Title and abstract</b>    | 1                                                                                  | (a) Indicate the study's design with a commonly used term in the title or the abstract                                                                                                                       | 1       |
|                              |                                                                                    | (b) Provide in the abstract an informative and balanced summary of what was done and what was found                                                                                                          | 2       |
| <b>Introduction</b>          |                                                                                    |                                                                                                                                                                                                              |         |
| Background/rationale         | 2                                                                                  | Explain the scientific background and rationale for the investigation being reported                                                                                                                         | 3,4     |
| Objectives                   | 3                                                                                  | State specific objectives, including any prespecified hypotheses                                                                                                                                             | 2,4     |
| <b>Methods</b>               |                                                                                    |                                                                                                                                                                                                              |         |
| Study design                 | 4                                                                                  | Present key elements of study design early in the paper                                                                                                                                                      | 4,5     |
| Setting                      | 5                                                                                  | Describe the setting, locations, and relevant dates, including periods of recruitment, exposure, follow-up, and data collection                                                                              | 4       |
| Participants                 | 6                                                                                  | (a) Give the eligibility criteria, and the sources and methods of selection of participants                                                                                                                  | 4       |
| Variables                    | 7                                                                                  | Clearly define all outcomes, exposures, predictors, potential confounders, and effect modifiers. Give diagnostic criteria, if applicable                                                                     | 4,5     |
| Data sources/<br>measurement | 8*                                                                                 | For each variable of interest, give sources of data and details of methods of assessment (measurement). Describe comparability of assessment methods if there is more than one group                         | 4       |
| Bias                         | 9                                                                                  | Describe any efforts to address potential sources of bias                                                                                                                                                    | NA      |
| Study size                   | 10                                                                                 | Explain how the study size was arrived at                                                                                                                                                                    | 4,5     |
| Quantitative variables       | 11                                                                                 | Explain how quantitative variables were handled in the analyses. If applicable, describe which groupings were chosen and why                                                                                 | 4       |
| Statistical methods          | 12                                                                                 | (a) Describe all statistical methods, including those used to control for confounding                                                                                                                        | 4,5     |
|                              |                                                                                    | (b) Describe any methods used to examine subgroups and interactions                                                                                                                                          | NA      |
|                              | (c) Explain how missing data were addressed                                        | 5                                                                                                                                                                                                            |         |
|                              | (d) If applicable, describe analytical methods taking account of sampling strategy | 5                                                                                                                                                                                                            |         |
|                              | (e) Describe any sensitivity analyses                                              | NA                                                                                                                                                                                                           |         |
| <b>Results</b>               |                                                                                    |                                                                                                                                                                                                              |         |
| Participants                 | 13*                                                                                | (a) Report numbers of individuals at each stage of study—eg numbers potentially eligible, examined for eligibility, confirmed eligible, included in the study, completing follow-up, and analysed            | 5       |
|                              |                                                                                    | (b) Give reasons for non-participation at each stage                                                                                                                                                         | 5       |
|                              |                                                                                    | (c) Consider use of a flow diagram                                                                                                                                                                           | NA      |
| Descriptive data             | 14*                                                                                | (a) Give characteristics of study participants (eg demographic, clinical, social) and information on exposures and potential confounders                                                                     | 5,6     |
|                              |                                                                                    | (b) Indicate number of participants with missing data for each variable of interest                                                                                                                          | 5,6     |
| Outcome data                 | 15*                                                                                | Report numbers of outcome events or summary measures                                                                                                                                                         | 6       |
| Main results                 | 16                                                                                 | (a) Give unadjusted estimates and, if applicable, confounder-adjusted estimates and their precision (eg, 95% confidence interval). Make clear which confounders were adjusted for and why they were included | 6       |

|                          |    |                                                                                                                                                                            |     |
|--------------------------|----|----------------------------------------------------------------------------------------------------------------------------------------------------------------------------|-----|
|                          |    | (b) Report category boundaries when continuous variables were categorized                                                                                                  | NA  |
|                          |    | (c) If relevant, consider translating estimates of relative risk into absolute risk for a meaningful time period                                                           | NA  |
| Other analyses           | 17 | Report other analyses done—eg analyses of subgroups and interactions, and sensitivity analyses                                                                             | NA  |
| <b>Discussion</b>        |    |                                                                                                                                                                            |     |
| Key results              | 18 | Summarise key results with reference to study objectives                                                                                                                   | 6   |
| Limitations              | 19 | Discuss limitations of the study, taking into account sources of potential bias or imprecision. Discuss both direction and magnitude of any potential bias                 | 7   |
| Interpretation           | 20 | Give a cautious overall interpretation of results considering objectives, limitations, multiplicity of analyses, results from similar studies, and other relevant evidence | 7,8 |
| Generalisability         | 21 | Discuss the generalisability (external validity) of the study results                                                                                                      | 8   |
| <b>Other information</b> |    |                                                                                                                                                                            |     |
| Funding                  | 22 | Give the source of funding and the role of the funders for the present study and, if applicable, for the original study on which the present article is based              | 1   |

\*Give information separately for exposed and unexposed groups.

**Note:** An Explanation and Elaboration article discusses each checklist item and gives methodological background and published examples of transparent reporting. The STROBE checklist is best used in conjunction with this article (freely available on the Web sites of PLoS Medicine at <http://www.plosmedicine.org/>, Annals of Internal Medicine at <http://www.annals.org/>, and Epidemiology at <http://www.epidem.com/>). Information on the STROBE Initiative is available at [www.strobe-statement.org](http://www.strobe-statement.org).



# BMJ Open

## The reliability of hospital scores for the Cancer Patient Experience Survey: analysis of publicly reported patient survey data

|                                 |                                                                                                                                                                                                                                                                                                                                                                                                                                      |
|---------------------------------|--------------------------------------------------------------------------------------------------------------------------------------------------------------------------------------------------------------------------------------------------------------------------------------------------------------------------------------------------------------------------------------------------------------------------------------|
| Journal:                        | <i>BMJ Open</i>                                                                                                                                                                                                                                                                                                                                                                                                                      |
| Manuscript ID                   | bmjopen-2019-029037.R2                                                                                                                                                                                                                                                                                                                                                                                                               |
| Article Type:                   | Research                                                                                                                                                                                                                                                                                                                                                                                                                             |
| Date Submitted by the Author:   | 04-Jun-2019                                                                                                                                                                                                                                                                                                                                                                                                                          |
| Complete List of Authors:       | Abel, Gary; University of Exeter, University of Exeter Medical School (Primary Care)<br>Gomez-Cano, Mayam; University of Exeter - Saint Lukes Campus<br>Pham, Tra My; University College London , Behavioural Science and Health; University College London, Primary Care and Population Health<br>Lyratzopoulos, Georgios ; University College London, Department of Epidemiology & Public Health, Health Behaviour Research Centre |
| <b>Primary Subject Heading</b>: | Health services research                                                                                                                                                                                                                                                                                                                                                                                                             |
| Secondary Subject Heading:      | Oncology                                                                                                                                                                                                                                                                                                                                                                                                                             |
| Keywords:                       | ONCOLOGY, Quality Improvement, Medical Management, Health service research, Patients, Health policy < HEALTH SERVICES ADMINISTRATION & MANAGEMENT                                                                                                                                                                                                                                                                                    |
|                                 |                                                                                                                                                                                                                                                                                                                                                                                                                                      |

SCHOLARONE™  
Manuscripts

# The reliability of hospital scores for the Cancer Patient Experience Survey: analysis of publicly reported patient survey data

Gary A Abel, Mayam Gomez-Cano, Tra My Pham, Georgios Lyratzopoulos

Gary A Abel, Senior Lecturer, University of Exeter Medical School, [g.a.abel@exeter.ac.uk](mailto:g.a.abel@exeter.ac.uk)

Mayam Gomez-Cano, Postdoctoral Research Associate, University of Exeter Medical

School, [m.c.gomez-cano@exeter.ac.uk](mailto:m.c.gomez-cano@exeter.ac.uk)

Tra My Pham, Research Associate, University College London, [tra.pham.09@ucl.ac.uk](mailto:tra.pham.09@ucl.ac.uk)

Georgios Lyratzopoulos, Professor of Cancer Epidemiology, University College London,

[y.lyratzopoulos@ucl.ac.uk](mailto:y.lyratzopoulos@ucl.ac.uk)

Corresponding Author

Gary A Abel

University of Exeter Medical School (Primary Care)

Smeall Building

St Luke's Campus

Exeter

EX1 2LU

UK

[g.a.abel@exeter.ac.uk](mailto:g.a.abel@exeter.ac.uk)

## Declarations.

**Competing Interests.** The authors report grants from MacMillan Cancer Support, during the conduct of the study. GA and GL have acted as academic consultants providing methodological advice to NHS England Insight team regarding the Cancer Patient Experience Survey.

**Funding.** This research was funded by Macmillan Cancer Support (grant number 5995414). GL is funded by a Cancer Research UK Advanced Clinician Scientist Fellowship award (grant number C18081/A18180). The work presented here represents that of the authors and does not necessarily represent those of the funding organisations.

**Ethical Approval.** This study is entirely based on publically available data and so ethical approval is not required. The actual survey was conducted by the survey providers after obtaining section 251 approval of the NHS Act 2006 and Health Service (Control of Patient Information) Regulations 2002.

**Guarantor.** GA is guarantor for this paper

**Contributorship.** GA and GL conceived and designed the study. GA developed the methodological framework. MGC performed the analysis. All authors (GA, MGC, TMP, GL) contributed to the interpretation of findings and the drafting of the manuscript.

1  
2  
3 **Acknowledgments.** We thank the NHS England as commissioner of the 2016 Cancer Patient  
4 Experience Survey, Quality Health as data collector and publisher of the dataset, all NHS  
5 Acute Trusts in England for provision of data samples, and all patients who responded to the  
6 survey.  
7

8  
9 **Data sharing statement.** This study is based entirely on publically available data which can  
10 be found at <http://www.ncpes.co.uk/reports/2016-reports/local-reports-1/data-tables-1>  
11

12 The Corresponding Author has the right to grant on behalf of all authors and does grant on  
13 behalf of all authors, a worldwide licence  
14 ([http://www.bmj.com/sites/default/files/BMJ%20Author%20Licence%20March%202013.do](http://www.bmj.com/sites/default/files/BMJ%20Author%20Licence%20March%202013.doc)  
15 c) to the Publishers and its licensees in perpetuity, in all forms, formats and media (whether  
16 known now or created in the future), to i) publish, reproduce, distribute, display and store the  
17 Contribution, ii) translate the Contribution into other languages, create adaptations, reprints,  
18 include within collections and create summaries, extracts and/or, abstracts of the Contribution  
19 and convert or allow conversion into any format including without limitation audio, iii) create  
20 any other derivative work(s) based in whole or part on the on the Contribution, iv) to exploit  
21 all subsidiary rights to exploit all subsidiary rights that currently exist or as may exist in the  
22 future in the Contribution, v) the inclusion of electronic links from the Contribution to third  
23 party material where-ever it may be located; and, vi) licence any third party to do any or all  
24 of the above.  
25  
26  
27  
28

## 29 **Abstract**

30 **Objectives** To assess the degree to which variations in publicly reported hospital scores  
31 arising from the English Cancer Patient Experience Survey (CPES) are subject to chance.  
32  
33

34 **Design** Secondary analysis of publically reported data.  
35

36 **Setting** English National Health Service hospitals  
37

38 **Participants** 72,756 patients who were recently treated for cancer in one of 146 hospitals and  
39 responded to the 2016 English Cancer Patient Experience Survey  
40

41 **Main outcome measures** Spearman-Brown reliability of hospital scores on 51 evaluative  
42 questions regarding cancer care.  
43

44 **Results** Hospitals varied in respondent sample size with a median hospital sample size of 419  
45 responses (range 31 - 1972). There were some hospitals with generally highly reliable scores  
46 across most questions, whereas other hospitals had generally unreliable scores (the median  
47 reliability of question scores within individual hospitals varied between 0.11 and 0.86).  
48 Similarly, there were some questions with generally high reliability across most hospitals  
49 whereas other questions had generally low reliability. Of the 7,377 individual hospital scores  
50 publically reported (146 hospitals by 51 questions, minus 69 suppressed scores), only 34%  
51 reached a reliability of 0.7, the minimum generally considered to be useful. In order for 80%  
52 of the individual hospital scores to reach a reliability of 0.7, some hospitals would require a  
53 four-fold increase in number of respondents; although in a few other hospitals sample sizes  
54 could be reduced.  
55  
56  
57  
58  
59  
60

1  
2  
3 **Conclusions** The English Patient Experience Survey represents a globally unique source for  
4 understanding cancer patient experience, but in its present form it is not reliable for high  
5 stakes comparisons of the performance of different hospitals. Revised sampling strategies and  
6 survey questions could help increase the reliability of hospital scores, and thus make the  
7 survey fit for use in performance comparisons.  
8  
9

### 10 **Strengths and limitations of this study**

- 11 • We make use of the actual data used in public reporting of a high profile survey with  
12 a high response rate, allowing us to make direct inferences about the quality indicators  
13 under consideration.  
14
- 15 • Mixed effects logistic regression models are used to effectively partition the observed  
16 variability in hospital scores into that which is due to chance and that which reflects  
17 true differences between hospitals.  
18
- 19 • Our analysis considers three different contributing factors affecting the reliability of  
20 hospital scores which can give insight into designing potential improvement efforts.  
21
- 22 • This study only considers the crude hospital scores and not those adjusted for patient  
23 case-mix which have recently been reported. However, as we expect any such  
24 adjustment to result in lower reliabilities the conclusions of the study remain valid.  
25  
26  
27  
28  
29  
30  
31  
32  
33  
34  
35  
36  
37  
38  
39  
40  
41  
42  
43  
44  
45  
46  
47  
48  
49  
50  
51  
52  
53  
54  
55  
56  
57  
58  
59  
60

## Introduction

‘Before you can improve it you first have to measure it’ is a common adage of the quality improvement movement across the world<sup>1</sup>. Coupled with a tendency towards greater public accountability, this maxim has led to an ever-increasing number of measurement initiatives, typically underpinned by public reporting of scores of healthcare organisations.<sup>2, 3</sup>

Together with patient safety and clinical effectiveness, patient experience is being increasingly accepted as a distinct dimension of care quality<sup>4</sup>. Relatedly, policy-makers regularly commission large scale nationwide patient surveys in the US and the UK.<sup>5-7</sup> Most such surveys are aimed at patients with diverse a range of conditions. However, a repeatable disease-specific survey for cancer patients was launched in England in 2010, and its findings are reported publicly and used by healthcare improvement teams in constructing and evaluating action plans.

The statistical reliability of measures of care quality remains a concern, as often the sample sizes involved in organisational comparisons are small. Ideally, measurement initiatives should follow prior examination of the statistical properties of indicators, but this is rarely the case. Some previous UK work has examined the reliability of indicators of stage at diagnosis, diagnostic activity, general practice patient experience and general practice high risk prescribing, on the whole providing cautionary findings indicating the risk of unreliability of organisational rankings.<sup>8-12</sup> Similar approaches and findings have been reported from the US and Dutch settings.<sup>13-19</sup>

These considerations highlight the need for examining the reliability of hospital scores for the Cancer Patient Experience survey, and have motivated us to examine this question empirically in this study. Its aim was to provide a detailed profile of the statistical reliability (and therefore of the role of chance) in hospital scores derived from the Cancer Patient Experience Survey.

## Methods

Data were analysed relating to respondents to the 2016 National Cancer Patient Experience Survey. The (English) National Cancer Patient Experience Survey 2016 survey questionnaire is the sixth iteration of the survey first undertaken in 2010. It includes many evaluative questions covering the experience of diagnosis, diagnostic testing, shared-decision-making, specialist nursing, inpatient care, anti-cancer treatment (surgery, radiotherapy, chemotherapy), hospital discharge and care in the community, together with an overall item for overall satisfaction with care. Survey results are reported publicly for each English hospital to drive local quality improvements, to assist commissioners and providers of cancer

care; and to inform the work of the various charities and stakeholder groups supporting cancer patients. The survey was mailed to all adult patients (aged 16 and over) discharged from a National Health Service hospital after inpatient or a day case cancer-related treatment during April-June 2016 after vital status checks at survey mail-out (between 3-5 months after the sampling period).

Respondents comprised patients aged 16 years and above who were treated for cancer in English National Health Service (NHS) hospitals during April-June 2016. The patients had relevant ICD10 codes for cancer (C00-99 excluding C44 and C84, and D05) and were not known to have died prior to the survey mail out. Questionnaires were sent by post and responses could be made by post, online or using a telephone translation service. Details of the survey and method of administration have been published previously<sup>20</sup>. In this study we make use of publically reported hospital level data<sup>21</sup>.

Survey questions have up to 7 response options which are dichotomised for public reporting such that hospitals scores represent the percentage of patients reporting a positive experience for each question. Scores are produced for hospital trusts and Clinical Commissioning Groups (CCG). Further details are given in the Technical Documentation<sup>22</sup>.

We calculated the Spearman-Brown (inter-unit) reliability of each hospital score. This is equivalent to the proportion of variation in hospital-level mean scores (for a given hospital sample size) attributable to the true (underlying) variation between them. Following previous work, we estimated reliability by partitioning the observed variability in hospital scores into two components, variability between hospitals and variability within hospitals, using mixed effects logistic regression models<sup>8, 23</sup>. For each question, a random intercept model (with no fixed effects other than the constant) was used to estimate the between hospital variance on the log-odds scale. This variance is a measure of the true (underlying) variation which can be thought of as that which would be seen with very large sample sizes in each hospital, such that the influence of sampling variation would be minimal<sup>8, 23</sup>. Since our scores are binary measures, the within hospital variance also depends on the level of achievement at each hospital, and can be described by the binomial distribution. In this context, for each question the reliability  $\lambda$  of hospital  $i$  is given by

$$\lambda_i = \frac{\sigma_b^2}{\sigma_b^2 + \frac{1}{p_i(1-p_i)n_i}} \quad 1$$

Where  $\sigma_b^2$  is the true (underlying) between hospital variance on the log-odds scale,  $p_i$  is the observed proportion of patients reporting a positive experience in hospital  $i$  and  $n_i$  is the sample size of hospital  $i$ . High stakes purposes have important consequences for an individual or organisation (i.e. when attached to a financial incentive, publicly reported league tables or an outcome measure in a research study) and therefore require high measure reliability. Reliability can takes values from 0 to 1. Values  $<0.70$  are considered to represent low reliability, whereas values  $\geq 0.90$  represent high reliability, required for 'high-stake' purposes; in-between values are considered to represent adequate reliability.

Where less than 21 responses were received for an individual question for a hospital, results were not publicly reported. Of the 148 hospitals included in the survey there were two hospitals with less than 21 responses for every question. We excluded these two hospitals from our analysis. However there remained 69 suppressed scores (from 18 hospitals) in the

publically reported data due to low numbers of respondents to certain questions applicable to only some patients. These scores were excluded from the analysis.

We calculated reliability for every hospital score on each question (a total of 146 hospitals multiplied by 51 questions = 7,446 individual scores, minus 69 suppressed scores = 7,377 individual scores).

Additionally, the model outputs were used to estimate the increase in sample size required for each hospital to reach a reliability of 0.7 for each question<sup>8,23</sup>. We used R version 3.4.4 for all analyses.

### Patient involvement

The Cancer Patient Experience Survey development and administration are supported by an advisory group which includes patient advocates. The present study forms part of a wider project funded by MacMillan Cancer Support for which there is an advisory group with patient representative participation.

### Results

Overall, there were 72,756 respondents to the National Cancer Patient Experience Survey in 2016 (response rate 66%) who were treated at the 146 hospitals included in our analysis. Our findings are displayed in three figures each comprising a grid of hospitals by questions. Hospitals are ordered according to the number of responders and questions are ordered according to the between hospital variance. Hospitals varied in respondent sample size with a median of 419 responses (range 31 - 1972). Due to different sections of the questionnaire corresponding to different care pathways, not all questions were applicable to all patients and so the number of respondents varied considerably for each of the 51 questions. The number of respondents answering individual questions varied between 15,968 (22%) and 71,773 (99%) with a median of 52,786 (73%). The number of respondents for each question in each hospital is shown in Figure 1 and supplementary material Table 1.

[Insert Figure 1.]

The percentage of patients reporting a positive experience was highly variable between questions and between hospitals (Figure 2 and supplementary material Table 2). The median percentage of patients reporting positive experience across individual questions was 79% (range 29% - 96%) while the corresponding median across individual hospitals was 75% (range 51% - 82%).

[Insert Figure 2.]

Figure 3 (and supplementary material Table 3) shows the reliability of the score for each question at each hospital. There were some hospitals with generally high reliability across most questions, whereas others had generally low reliability across survey items. The median reliability of question scores within individual hospitals was 0.60 (range 0.11 – 0.86). Similarly there were some questions with generally high reliability whereas others had generally low reliability. The median reliability of hospital scores within individual questions was 0.58 (range 0.21 – 0.93).

[Insert Figure 3.]

1  
2  
3 Given that reliability depends on the sample size, the between hospital variance and the  
4 hospital performance, we can examine how these factors influence reliability. Consistent with  
5 this hospitals which tended to have low reliability also had small sample sizes. Also questions  
6 with low reliability tended to be those where the between-hospital variance is low. However,  
7 there are some exceptions to this which can be seen as the horizontal lines composed mostly  
8 of red squares in Figure 3. Some CPES questions are unreliable across all hospitals because  
9 they have, across all hospitals, a small number of respondents to that particular question.  
10 Examples include questions only applicable to patients treated by radiotherapy (questions 44  
11 and 45). In general, questions with small sample sizes relate to patients on a particular care  
12 pathway. Other cases of low reliability can be seen in questions for which hospitals  
13 performance is consistently high (questions 5 and 25).  
14  
15  
16

17 Overall the reliability of hospitals scores for the survey is low. Of the 7,377 individual  
18 hospital-question pairs, only 35 % reached a reliability of 0.7, the minimum generally  
19 considered to be useful. As it is possible to improve reliability by increasing the sample size  
20 for a given hospital we calculated how many multiples of the current sample size would be  
21 required to reach a reliability of 0.7 for each question (Figure 4) It would be possible to  
22 increase the percentage of hospital scores reaching a reliability of 0.7 to 60% by doubling the  
23 individual hospital sample size. Further increases lead to smaller gains, though 80% of the  
24 individual hospital scores would have achieved a reliability of 0.7 or more with 4 times as  
25 much data (which represents the upper limit of what could be achieved within a single year of  
26 data collection, though could also be achieved by aggregating over longer time periods).  
27  
28  
29

30 [Insert Figure 4.]  
31  
32  
33

## 34 Discussion

35  
36 In this study we have profiled the reliability of a high-profile national patient experience  
37 survey for cancer patients. Our findings show that about two-thirds of hospital scores in this  
38 survey do not meet reliability levels generally accepted as useful. In practical terms this  
39 means that identification of hospitals that are performing well in specific aspects of care is  
40 hampered due to the influence of chance. The lack of reliability can be attributed to different  
41 factors which have variable influence.  
42  
43

44 Although there are thousands of healthcare quality indicators in current use, most are bereft  
45 of any evaluation of their statistical reliability. Patient experience scores of English general  
46 practices arising from early waves of the GPPS survey were found to have very high  
47 reliability, enabling subsequent reductions in the survey sample.<sup>9, 10</sup> In contrast, the present  
48 study, examining the reliability of CPES hospital scores for the first time, suggests the need  
49 for increases in the survey samples (see below). The present study forms part of an emerging  
50 body of literature examining the reliability of a diverse range of quality indicators, including  
51 from the UK, the US and The Netherlands<sup>8-19, 22, 23</sup>; we would nonetheless like to re-  
52 emphasise the mismatch between the very large number of indicators in current use and the  
53 small number of indicators that have been profiled for their reliability.  
54  
55  
56

57 The key strength of this study is the use of the actual data used in public reporting of a high  
58 profile survey with a high response rate. Its main limitation is that our analysis does not take  
59 into account the influence of patient case-mix. Certain patient groups have systematic  
60



1  
2  
3 tendencies towards reporting positive experiences compared to others<sup>24, 25</sup> and for this reason  
4 the results of the survey are reported in both adjusted and unadjusted form. Nonetheless, as  
5 patient case-mix explains some of the variability between hospitals<sup>26</sup>, had we calculated the  
6 reliability of case-mix adjusted scores we would have found the reliability would have been  
7 even lower than that presented here.  
8  
9

10 There are some hospitals that have low reliability for most questions as they treat a small  
11 number of patients, meaning that the uncertainty on their scores is inherently high. Further,  
12 there are some questions with low reliability due to limited true (underlying) variation  
13 between hospitals. In such cases, it is very hard to distinguish between hospitals since they  
14 are all performing at a similar level. As a consequence, in the absence of very large sample  
15 sizes, the observed variability between hospitals will be dominated by chance. A particular  
16 example of this phenomenon occurs for questions whose performance is consistently  
17 high/low across hospitals. It is harder to distinguish hospitals when performance is close to  
18 0% or 100%. Lastly, there are other questions with a small number of respondents as they are  
19 applicable to only subsets of patients. In brief the key mechanisms leading to low reliability  
20 are small hospital-level respondent sample, limited variability between hospitals (including  
21 because of ceiling/flooring effects) and small survey-level respondent sample.  
22  
23  
24

25 Given one of the main uses of NCPES is to inform hospital level performance, one might  
26 suggest that in its current form the survey is not fit for one of its main intended purposes  
27 (though it should be noted that the reliability limitations we report do not affect the use of the  
28 survey for providing national-level intelligence about the experience of cancer patients across  
29 English hospitals). It could be argued that rather than suppressing score made on the basis of  
30 less than 20 respondents as is currently done, all scores which have a reliability below 0.7  
31 should be suppressed. Work in other contexts have shown that when reliability of metrics is  
32 low there is a large amount of misclassification of performance.<sup>23, 27</sup> At the very least we  
33 believe that users of the survey results should be made aware of the reliability of the hospital  
34 scores (with such reliability estimates accompanying the publicly reported scores) so that an  
35 informed interpretation can be made by patients, clinicians, managers and members of the  
36 public. There is a range of reasons why such transparent reporting of reliability of hospital  
37 scores may be useful. For example, a hospital may chose to focus improvement efforts on  
38 those questions where they perform worse than average *and* where they know their scores to  
39 be reliable. As we already noted, hospital comparisons are not the only purpose of the  
40 NCPES. National assessments of patient experiences are supported by CPES and these data  
41 have been used to investigate variation and disparities in care between patient groups<sup>24, 25</sup>. For  
42 these uses that do not involve organisational comparisons, concerns about the lack of inter-  
43 unit reliability are not applicable. Furthermore, it can also be useful to know that all hospitals  
44 are performing above a target level even though we may not be able to distinguish between  
45 them.  
46  
47  
48  
49  
50  
51

52 There are various ways in which the survey could be changed in response to these findings.  
53 Firstly, by redesigning the survey instrument or related reporting conventions. For example,  
54 questions where the variability between hospitals is very low could be considered as  
55 candidates for removal from subsequent survey waves as there is little point in classifying  
56 hospitals on aspects of care for which they have no tangible differences between them. A  
57 similar approach could be taken for questions where hospital performance is very high,  
58 although it may also be possible to add to or redesign the response options (or associated  
59  
60

1  
2  
3 reporting conventions) to bring the mean reported scores closer to 50% - which will increase  
4 the reliability of these items. We do note that in both these situations there is something to be  
5 celebrated as a lack of variability suggests equitable healthcare delivery and -in the context of  
6 'ceiling' effects, a high performance implies high quality health care delivery. However,  
7 continued measurement of such aspect may not be the best use of patient survey resources. It  
8 is not without irony that the aims of quality improvement efforts underpinned by patient  
9 surveys are to improve service and reduce disparities, both of which reduce reliability and in  
10 turn reduce the usefulness of such survey items.  
11  
12

13  
14 Another way by which reliability could be increased is to increase the sample size. Currently  
15 the NCPES sample consists of all patients treated in a particular three-month period. If a  
16 whole year sample was used instead we would have up to four times as many patients  
17 available. Our findings suggest that the vast majority of hospitals-level scores in such a case  
18 would be reliable, though of course there would be an increase in cost of delivering the  
19 survey. Rather than continuing with the current 'census' approach (whereby all patients who  
20 fit eligibility criteria during the survey sampling period form part of the sampling frame),  
21 probability sampling could be used. This would mean surveying more patients than is  
22 currently done in hospitals treating small numbers of cancer patients and fewer than currently  
23 done in those treating many cancer patients, potentially having little impact on the total  
24 sample size. Indeed the optimal design for a survey that puts equal importance on every  
25 hospital is an equal sample size for each hospital and fixed target respondent numbers per  
26 unit of assessment are already used in a number of NHS and international surveys<sup>6, 7</sup>.  
27 However, changing the length of the sampling window will likely impact the composition of  
28 responders as this is dictated by variation in treatment modalities, early mortality and non-  
29 response, the effect of which will depend on the sampling window<sup>28</sup>. This in turn may impact  
30 the ability to compare results to those from previous years. An alternative approach of  
31 aggregating multiple years of survey results will also improve reliability, though it will  
32 reduce the timeliness of scores and potentially reduce the usability of the findings. Similarly,  
33 improvements in response rate can also increase the sample size, in turn improving reliability.  
34 The scope for improvement in this survey may be limited due to it already having a high  
35 response rate, but for other surveys that may not be true.  
36  
37  
38  
39  
40  
41

## 42 **Conclusion**

43  
44 The English Patient Experience Survey represents a globally unique source for understanding  
45 cancer patient experience, but in its present form it is not reliable for high stakes comparisons  
46 of the performance of different hospitals. In profiling the survey we have found that around  
47 two-thirds of hospital scores are not reliable. This severely hampers the use of this survey for  
48 hospital comparisons and raises questions over the suitability of its current design.  
49 Classifying hospitals as being a poor performer on an unreliable question may lead to unfair  
50 reputational loss and misplaced quality improvement efforts resulting in an opportunity cost.  
51 Classifying hospitals as high performers on unreliable questions may lead to false reassurance  
52 in related areas thus missing the opportunity for improvement. Redesigning the questions and  
53 sampling strategy used could dramatically improve the percentage of reliable hospital scores  
54 and thus making the survey far more useful.  
55  
56  
57  
58  
59  
60

## 61 **Figure legends**

**Figure 1** Sample sizes for each of the 146 hospitals included in the analysis by question (CPES 2016). Each rectangle corresponds to a single hospital and question. Its colour indicates one of five sample size categories as shown on the legend. The exact values for each cell in this plot are provided in supplementary material Table 1.

**Figure 2** Proportions of patients reporting a positive experience by question and for each of the 146 hospitals included in the analysis (CPES 2016). Each rectangle corresponds to a single hospital and question. Its colour indicates one of five proportions categories as shown on the legend. The exact values for each cell in this plot are provided in supplementary material Table 2.

**Figure 3** Main central grid: Reliability of hospital scores for each of the 146 hospitals included in the analysis (CPES 2016). Each rectangle corresponds to a single hospital and question. Its colour indicates one of four reliability categories as shown on the legend. Left hand side plot: The variance for each question on the log odds scale. The order of the questions has the same order than that of the main grid and is sorted from the question with lowest between hospital variance to the question with greatest between hospital variance. Bottom plot: The sample size for each hospital in terms of the total number of responders. The order of the hospitals has the same order than that of the main grid and is sorted from the hospital with the smallest sample size to the hospital with greatest sample size. The exact values for each cell in this plot are provided in the supplementary material Table 3.

**Figure 4** The expected percentage of hospital scores reaching a reliability of at least 0.7 when changing individual hospital sample sizes for each question.

1. Raleigh V and Foot S. *Getting the measure of quality: Opportunities and challenges*. 2010.
2. Quality Watch. NHS & Social Care Quality Indicators - Data & Statistics <http://www.qualitywatch.org.uk/indicators> (accessed 09/07/2018).
3. NHS Digital. Compendium of Population Health Indicators <https://digital.nhs.uk/data-and-information/publications/ci-hub/compendium-indicators>.
4. Darzi A. Quality and the NHS Next Stage Review. *The Lancet* 2008; 371: 1563-1564.
5. Centers for Medicare & Medicaid Services. Consumer Assessment of Healthcare Providers & Systems (CAHPS), <https://www.cms.gov/Research-Statistics-Data-and-Systems/Research/CAHPS/> (accessed 07/09/2018).
6. Ipsos MORI. 2018 GP Patient Survey Results Released, <https://www.ipsos.com/ipsos-mori/en-uk/2018-gp-patient-survey-results-released> (2018, accessed 07/09/2018).
7. Care Quality Commission. Adult inpatient survey 2017: Statistical release, <https://www.cqc.org.uk/publications/surveys/adult-inpatient-survey-2017> (2018).
8. Abel G, Saunders CL, Mendonca SC, et al. Variation and statistical reliability of publicly reported primary care diagnostic activity indicators for cancer: a cross-sectional ecological study of routine data. *BMJ Quality & Safety* 2018; 27: 21-30. DOI: 10.1136/bmjqs-2017-006607.
9. Roland M, Elliott M, Lyratzopoulos G, et al. Reliability of patient responses in pay for performance schemes: analysis of national General Practitioner Patient Survey data in England. *BMJ* 2009; 339. DOI: 10.1136/bmj.b3851.
10. Lyratzopoulos G, Elliott MN, Barbiere JM, et al. How can health care organizations be reliably compared?: Lessons from a national survey of patient experience. *Medical care* 2011; 49: 724-733. 2011/05/26. DOI: 10.1097/MLR.0b013e31821b3482.

11. Stocks SJ, Kontopantelis E, Akbarov A, et al. Examining variations in prescribing safety in UK general practice: cross sectional study using the Clinical Practice Research Datalink. *BMJ* 2015; 351. DOI: 10.1136/bmj.h5501.
12. Guthrie B, McCowan C, Davey P, et al. High risk prescribing in primary care patients particularly vulnerable to adverse drug events: cross sectional population database analysis in Scottish general practice. *BMJ* 2011; 342. DOI: 10.1136/bmj.d3514.
13. Verburg IWM, de Keizer NF, Holman R, et al. Individual and Clustered Rankability of ICUs According to Case-Mix-Adjusted Mortality\*. *Critical Care Medicine* 2016; 44: 901-909. DOI: 10.1097/ccm.0000000000001521.
14. Guglielminotti J and Li G. Monitoring Obstetric Anesthesia Safety across Hospitals through Multilevel Modeling. *Anesthesiology* 2015; 122: 1268-1279. DOI: 10.1097/ALN.0000000000000617.
15. Krell RW, Hozain A, Kao LS, et al. Reliability of risk-adjusted outcomes for profiling hospital surgical quality. *JAMA Surgery* 2014; 149: 467-474. DOI: 10.1001/jamasurg.2013.4249.
16. Shih T and Dimick JB. Reliability of Readmission Rates as a Hospital Quality Measure in Cardiac Surgery. *The Annals of Thoracic Surgery* 2014; 97: 1214-1218. DOI: <https://doi.org/10.1016/j.athoracsur.2013.11.048>.
17. Van Dishoeck A-M, Lingsma HF, Mackenbach JP, et al. Random variation and rankability of hospitals using outcome indicators. *BMJ Quality & Safety* 2011; 20: 869-874. DOI: 10.1136/bmjqs.2010.048058.
18. Henneman D, van Bommel ACM, Snijders A, et al. Ranking and Rankability of Hospital Postoperative Mortality Rates in Colorectal Cancer Surgery. *Annals of Surgery* 2014; 259: 844-849. DOI: 10.1097/sla.0000000000000561.
19. Sequist TD, Schneider EC, Li A, et al. Reliability of Medical Group and Physician Performance Measurement in the Primary Care Setting. *Medical care* 2011; 49: 126-131. DOI: 10.1097/MLR.0b013e3181d5690f.
20. Quality Health. Guidance material and survey material, <http://www.ncpes.co.uk/reports/2016-reports/guidance-material-and-survey-materials/3211-2016-cancer-survey-guidance/file> (2016).
21. Quality Health. National Cancer Experience Survey 2016. Reports. Data tables, <http://www.ncpes.co.uk/reports/2016-reports/local-reports-1/data-tables-1> (2017).
22. Quality Health. Technical Documentation, <http://www.ncpes.co.uk/reports/2016-reports/guidance-material-and-survey-materials/3210-2016-national-cancer-patient-experience-survey-technical-documentation/file> (2016).
23. Barclay ME, Lyratzopoulos G, Greenberg DC, et al. Missing data and chance variation in public reporting of cancer stage at diagnosis: Cross-sectional analysis of population-based data in England. *Cancer Epidemiology* 2018; 52: 28-42. DOI: <https://doi.org/10.1016/j.canep.2017.11.005>.
24. El Turabi A, Abel GA, Roland M, et al. Variation in reported experience of involvement in cancer treatment decision making: evidence from the National Cancer Patient Experience Survey. *British Journal Of Cancer* 2013; 109: 780. *Epidemiology*. DOI: 10.1038/bjc.2013.316  
<https://www.nature.com/articles/bjc2013316#supplementary-information>.
25. Saunders CL, Abel GA and Lyratzopoulos G. Inequalities in reported cancer patient experience by socio-demographic characteristic and cancer site: evidence from respondents to the English Cancer Patient Experience Survey. *European Journal of Cancer Care* 2015; 24: 85-98. DOI: doi:10.1111/ecc.12267.
26. Abel GA, Saunders CL and Lyratzopoulos G. Cancer patient experience, hospital performance and case mix: evidence from England. *Future Oncology* 2014; 10: 1589-1598. DOI: 10.2217/fon.13.266.
27. Yu H, Mehrotra A and Adams J. Reliability of utilization measures for primary care physician profiling. *Healthcare* 2013; 1: 22-29. DOI: <https://doi.org/10.1016/j.hjdsi.2013.04.002>.
28. Abel GA, Saunders CL and Lyratzopoulos G. Post-sampling mortality and non-response patterns in the English Cancer Patient Experience Survey: Implications for epidemiological studies

1  
2  
3 based on surveys of cancer patients. *Cancer Epidemiology* 2016; 41: 34-41. DOI:  
4 10.1016/j.canep.2015.12.010.  
5  
6  
7  
8  
9  
10  
11  
12  
13  
14  
15  
16  
17  
18  
19  
20  
21  
22  
23  
24  
25  
26  
27  
28  
29  
30  
31  
32  
33  
34  
35  
36  
37  
38  
39  
40  
41  
42  
43  
44  
45  
46  
47  
48  
49  
50  
51  
52  
53  
54  
55  
56  
57  
58  
59  
60

For peer review only

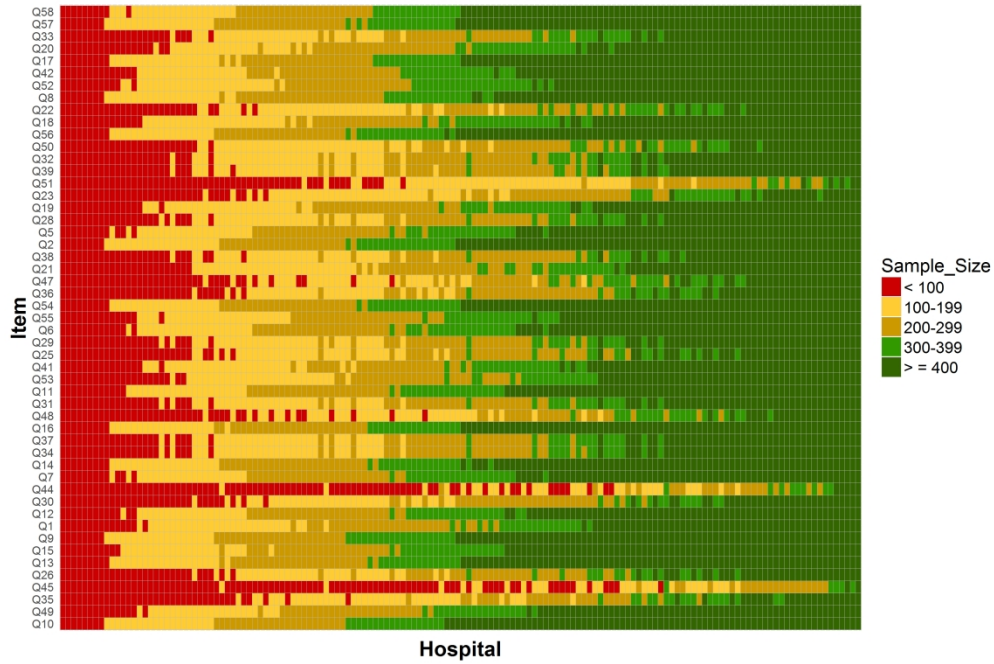

Figure 1 Sample sizes for each of the 146 hospitals included in the analysis by question (CPES 2016). Each rectangle corresponds to a single hospital and question. Its colour indicates one of five sample size categories as shown on the legend. The exact values for each cell in this plot are provided in supplementary material Table 1.

304x203mm (300 x 300 DPI)

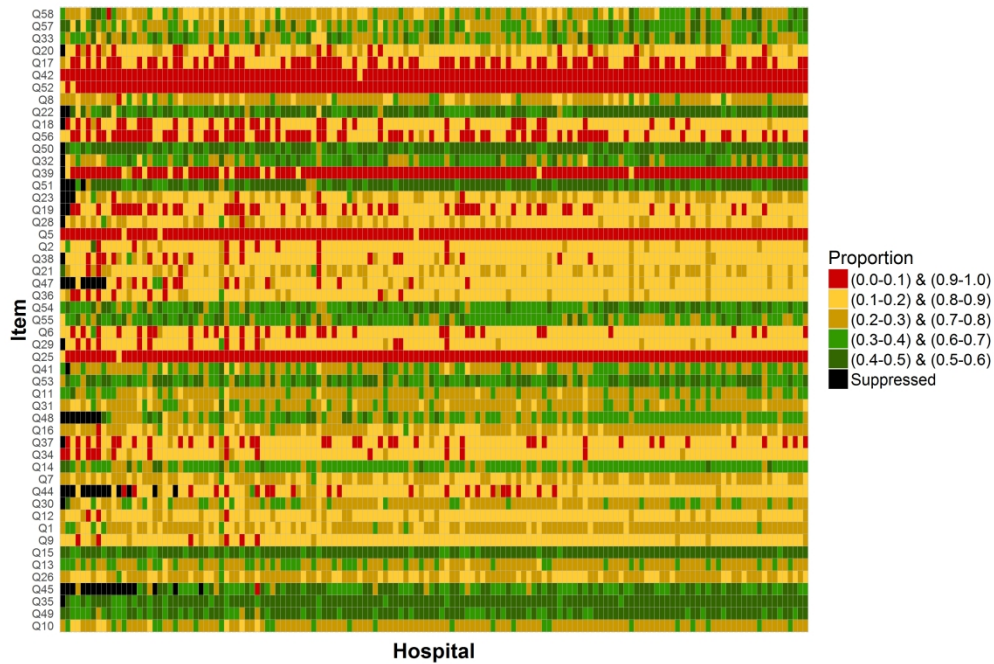

Figure 2 Proportions of patients reporting a positive experience by question and for each of the 146 hospitals included in the analysis (CPES 2016). Each rectangle corresponds to a single hospital and question. Its colour indicates one of five proportions categories as shown on the legend. The exact values for each cell in this plot are provided in supplementary material Table 2.

304x203mm (300 x 300 DPI)

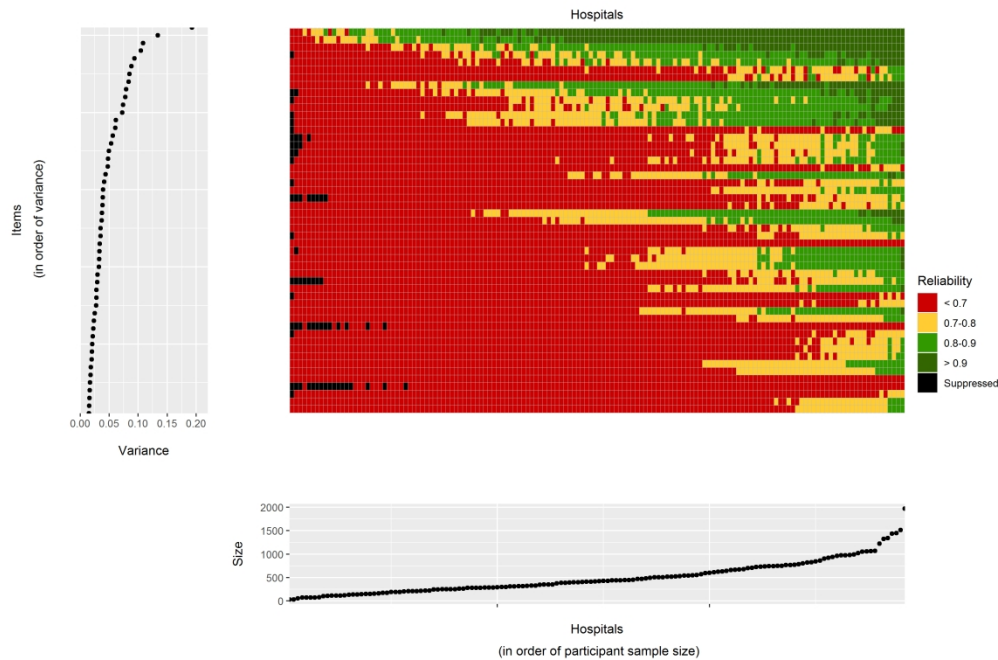

Main central grid: Reliability of hospital scores for each of the 146 hospitals included in the analysis (CPES 2016). Each rectangle corresponds to a single hospital and question. Its colour indicates one of four reliability categories as shown on the legend. Left hand side plot: The variance for each question on the log odds scale. The order of the questions has the same order than that of the main grid and is sorted from the question with lowest between hospital variance to the question with greatest between hospital variance. Bottom plot: The sample size for each hospital in terms of the total number of responders. The order of the hospitals has the same order than that of the main grid and is sorted from the hospital with the smallest sample size to the hospital with greatest sample size. The exact values for each cell in this plot are provided in the supplementary material Table 3.

304x203mm (300 x 300 DPI)



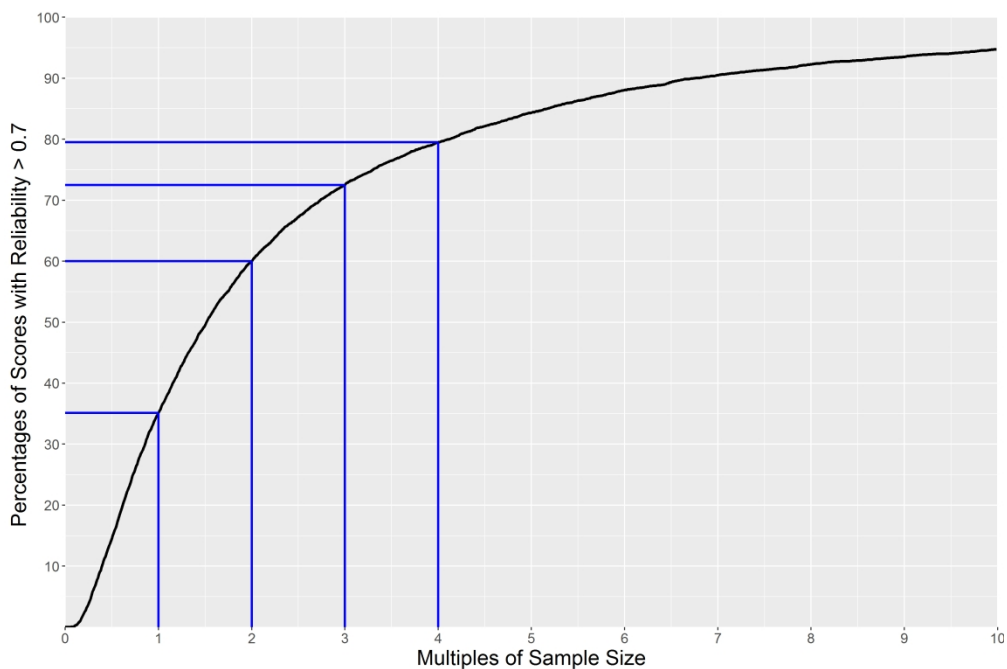

The expected percentage of hospital scores reaching a reliability of at least 0.7 when changing individual hospital sample sizes for each question.

304x203mm (300 x 300 DPI)

**Table 1.** Sample sizes by question for each of the 146 hospitals included in the analysis (CPES 2016). the cells in Figure 1.

| Questions | Hospitals |     |     |     |     |     |     |
|-----------|-----------|-----|-----|-----|-----|-----|-----|
|           | RQX       | RRJ | RT3 | RMP | RPC | REP | RAN |
| Q10       | 31        | 30  | 53  | 71  | 70  | 73  | 74  |
| Q49       | 22        | 27  | 44  | 62  | 54  | 68  | 63  |
| Q35       | 20        | 23  | 34  | 45  | 33  | 52  | 44  |
| Q45       | 6         | 6   | 1   | 22  | 6   | 13  | 17  |
| Q26       | 23        | 27  | 46  | 48  | 63  | 64  | 62  |
| Q13       | 29        | 30  | 44  | 65  | 61  | 67  | 66  |
| Q15       | 27        | 29  | 35  | 60  | 54  | 64  | 61  |
| Q9        | 30        | 31  | 53  | 69  | 68  | 71  | 73  |
| Q1        | 23        | 21  | 31  | 56  | 54  | 61  | 58  |
| Q12       | 29        | 23  | 45  | 65  | 54  | 64  | 58  |
| Q30       | 18        | 23  | 41  | 41  | 40  | 50  | 57  |
| Q44       | 8         | 6   | 2   | 22  | 7   | 15  | 18  |
| Q7        | 27        | 26  | 47  | 62  | 55  | 54  | 67  |
| Q14       | 29        | 31  | 47  | 67  | 64  | 68  | 66  |
| Q34       | 21        | 28  | 48  | 54  | 50  | 66  | 62  |
| Q37       | 20        | 28  | 48  | 53  | 50  | 66  | 63  |
| Q16       | 29        | 30  | 50  | 67  | 69  | 71  | 68  |
| Q48       | 5         | 1   | 2   | 20  | 6   | 15  | 6   |
| Q31       | 21        | 28  | 48  | 53  | 50  | 66  | 63  |
| Q11       | 29        | 28  | 37  | 60  | 57  | 65  | 61  |
| Q53       | 21        | 22  | 35  | 51  | 43  | 48  | 55  |
| Q41       | 23        | 19  | 28  | 51  | 40  | 47  | 51  |
| Q25       | 23        | 27  | 47  | 49  | 66  | 65  | 61  |
| Q29       | 20        | 28  | 49  | 55  | 50  | 64  | 63  |
| Q6        | 27        | 27  | 46  | 62  | 56  | 54  | 66  |
| Q55       | 24        | 28  | 38  | 49  | 57  | 54  | 50  |
| Q54       | 29        | 32  | 49  | 68  | 67  | 71  | 71  |
| Q36       | 21        | 26  | 44  | 50  | 45  | 63  | 58  |
| Q47       | 6         | 2   | 4   | 22  | 8   | 16  | 6   |
| Q21       | 24        | 23  | 33  | 53  | 38  | 44  | 44  |
| Q38       | 18        | 27  | 47  | 49  | 48  | 62  | 61  |
| Q2        | 31        | 32  | 50  | 70  | 70  | 72  | 71  |
| Q5        | 26        | 26  | 46  | 63  | 55  | 54  | 63  |
| Q28       | 20        | 28  | 49  | 54  | 49  | 65  | 63  |
| Q19       | 17        | 19  | 36  | 58  | 44  | 57  | 50  |
| Q23       | 18        | 14  | 20  | 39  | 23  | 23  | 32  |
| Q51       | 18        | 14  | 18  | 30  | 17  | 25  | 38  |
| Q39       | 19        | 28  | 44  | 53  | 47  | 64  | 56  |
| Q32       | 20        | 28  | 48  | 54  | 50  | 66  | 63  |
| Q50       | 19        | 23  | 24  | 59  | 29  | 38  | 53  |
| Q56       | 30        | 32  | 49  | 71  | 68  | 73  | 72  |
| Q18       | 18        | 21  | 38  | 62  | 48  | 60  | 55  |
| Q22       | 17        | 20  | 26  | 47  | 24  | 40  | 43  |
| Q8        | 26        | 30  | 47  | 67  | 69  | 71  | 68  |
| Q52       | 25        | 25  | 47  | 59  | 56  | 58  | 55  |

|    |            |    |    |    |    |    |    |    |
|----|------------|----|----|----|----|----|----|----|
| 1  |            |    |    |    |    |    |    |    |
| 2  | <b>Q42</b> | 23 | 21 | 33 | 61 | 61 | 54 | 60 |
| 3  | <b>Q17</b> | 29 | 27 | 47 | 68 | 67 | 70 | 68 |
| 4  | <b>Q20</b> | 19 | 24 | 34 | 61 | 45 | 57 | 51 |
| 5  | <b>Q33</b> | 21 | 28 | 48 | 54 | 49 | 66 | 62 |
| 6  | <b>Q57</b> | 29 | 32 | 48 | 69 | 66 | 73 | 71 |
| 7  | <b>Q58</b> | 29 | 26 | 49 | 66 | 64 | 69 | 70 |
| 8  |            |    |    |    |    |    |    |    |
| 9  |            |    |    |    |    |    |    |    |
| 10 |            |    |    |    |    |    |    |    |
| 11 |            |    |    |    |    |    |    |    |
| 12 |            |    |    |    |    |    |    |    |
| 13 |            |    |    |    |    |    |    |    |
| 14 |            |    |    |    |    |    |    |    |
| 15 |            |    |    |    |    |    |    |    |
| 16 |            |    |    |    |    |    |    |    |
| 17 |            |    |    |    |    |    |    |    |
| 18 |            |    |    |    |    |    |    |    |
| 19 |            |    |    |    |    |    |    |    |
| 20 |            |    |    |    |    |    |    |    |
| 21 |            |    |    |    |    |    |    |    |
| 22 |            |    |    |    |    |    |    |    |
| 23 |            |    |    |    |    |    |    |    |
| 24 |            |    |    |    |    |    |    |    |
| 25 |            |    |    |    |    |    |    |    |
| 26 |            |    |    |    |    |    |    |    |
| 27 |            |    |    |    |    |    |    |    |
| 28 |            |    |    |    |    |    |    |    |
| 29 |            |    |    |    |    |    |    |    |
| 30 |            |    |    |    |    |    |    |    |
| 31 |            |    |    |    |    |    |    |    |
| 32 |            |    |    |    |    |    |    |    |
| 33 |            |    |    |    |    |    |    |    |
| 34 |            |    |    |    |    |    |    |    |
| 35 |            |    |    |    |    |    |    |    |
| 36 |            |    |    |    |    |    |    |    |
| 37 |            |    |    |    |    |    |    |    |
| 38 |            |    |    |    |    |    |    |    |
| 39 |            |    |    |    |    |    |    |    |
| 40 |            |    |    |    |    |    |    |    |
| 41 |            |    |    |    |    |    |    |    |
| 42 |            |    |    |    |    |    |    |    |
| 43 |            |    |    |    |    |    |    |    |
| 44 |            |    |    |    |    |    |    |    |
| 45 |            |    |    |    |    |    |    |    |
| 46 |            |    |    |    |    |    |    |    |
| 47 |            |    |    |    |    |    |    |    |
| 48 |            |    |    |    |    |    |    |    |
| 49 |            |    |    |    |    |    |    |    |
| 50 |            |    |    |    |    |    |    |    |
| 51 |            |    |    |    |    |    |    |    |
| 52 |            |    |    |    |    |    |    |    |
| 53 |            |    |    |    |    |    |    |    |
| 54 |            |    |    |    |    |    |    |    |
| 55 |            |    |    |    |    |    |    |    |
| 56 |            |    |    |    |    |    |    |    |
| 57 |            |    |    |    |    |    |    |    |
| 58 |            |    |    |    |    |    |    |    |
| 59 |            |    |    |    |    |    |    |    |
| 60 |            |    |    |    |    |    |    |    |

For peer review only

These values correspond to

|    | <b>RGM</b> | <b>RBQ</b> | <b>R1F</b> | <b>RKE</b> | <b>RE9</b> | <b>RJ6</b> | <b>RVY</b> | <b>RA4</b> | <b>RJN</b> |
|----|------------|------------|------------|------------|------------|------------|------------|------------|------------|
| 10 | 75         | 101        | 107        | 110        | 112        | 115        | 118        | 133        | 134        |
| 11 | 70         | 84         | 83         | 86         | 88         | 89         | 88         | 102        | 97         |
| 12 | 33         | 59         | 49         | 50         | 44         | 50         | 35         | 52         | 43         |
| 13 | 16         | 15         | 16         | 20         | 14         | 19         | 11         | 19         | 33         |
| 14 | 48         | 79         | 69         | 57         | 46         | 68         | 52         | 74         | 76         |
| 15 | 62         | 95         | 101        | 106        | 110        | 108        | 116        | 127        | 131        |
| 16 | 57         | 89         | 94         | 94         | 100        | 101        | 102        | 115        | 124        |
| 17 | 75         | 100        | 108        | 105        | 110        | 112        | 118        | 131        | 133        |
| 18 | 45         | 71         | 70         | 89         | 82         | 79         | 92         | 104        | 83         |
| 19 | 66         | 87         | 93         | 99         | 100        | 96         | 99         | 110        | 115        |
| 20 | 48         | 70         | 61         | 49         | 53         | 64         | 42         | 60         | 50         |
| 21 | 16         | 16         | 20         | 22         | 16         | 22         | 12         | 22         | 36         |
| 22 | 73         | 80         | 100        | 86         | 96         | 103        | 94         | 117        | 108        |
| 23 | 67         | 96         | 103        | 103        | 106        | 109        | 112        | 123        | 130        |
| 24 | 53         | 83         | 75         | 57         | 57         | 76         | 51         | 79         | 66         |
| 25 | 53         | 83         | 75         | 57         | 57         | 76         | 52         | 79         | 66         |
| 26 | 70         | 99         | 102        | 106        | 108        | 106        | 112        | 128        | 131        |
| 27 | 11         | 21         | 28         | 55         | 52         | 40         | 44         | 60         | 62         |
| 28 | 53         | 82         | 75         | 56         | 57         | 76         | 51         | 78         | 65         |
| 29 | 64         | 85         | 94         | 95         | 97         | 103        | 103        | 114        | 120        |
| 30 | 51         | 73         | 71         | 81         | 84         | 75         | 83         | 82         | 98         |
| 31 | 48         | 64         | 76         | 79         | 92         | 82         | 83         | 94         | 103        |
| 32 | 49         | 80         | 68         | 56         | 46         | 70         | 51         | 74         | 78         |
| 33 | 53         | 83         | 75         | 56         | 56         | 75         | 52         | 78         | 66         |
| 34 | 73         | 80         | 99         | 84         | 94         | 103        | 95         | 118        | 108        |
| 35 | 62         | 77         | 92         | 79         | 87         | 76         | 94         | 101        | 105        |
| 36 | 75         | 97         | 102        | 101        | 109        | 107        | 117        | 129        | 130        |
| 37 | 50         | 76         | 66         | 52         | 50         | 58         | 44         | 64         | 56         |
| 38 | 14         | 20         | 31         | 59         | 60         | 43         | 53         | 65         | 68         |
| 39 | 45         | 67         | 67         | 86         | 78         | 64         | 76         | 78         | 77         |
| 40 | 52         | 79         | 70         | 51         | 53         | 69         | 44         | 71         | 59         |
| 41 | 72         | 102        | 107        | 110        | 108        | 112        | 117        | 129        | 131        |
| 42 | 73         | 81         | 101        | 87         | 96         | 101        | 95         | 118        | 106        |
| 43 | 53         | 81         | 75         | 55         | 56         | 73         | 52         | 79         | 66         |
| 44 | 56         | 73         | 82         | 94         | 95         | 71         | 78         | 84         | 101        |
| 45 | 22         | 37         | 39         | 60         | 49         | 44         | 45         | 56         | 55         |
| 46 | 22         | 56         | 36         | 37         | 33         | 35         | 37         | 27         | 35         |
| 47 | 51         | 81         | 71         | 54         | 55         | 69         | 47         | 76         | 64         |
| 48 | 53         | 82         | 75         | 57         | 57         | 75         | 50         | 78         | 65         |
| 49 | 35         | 77         | 62         | 60         | 60         | 56         | 60         | 42         | 71         |
| 50 | 75         | 99         | 105        | 105        | 109        | 107        | 120        | 132        | 133        |
| 51 | 63         | 78         | 86         | 98         | 94         | 73         | 82         | 97         | 107        |
| 52 | 37         | 58         | 58         | 63         | 72         | 48         | 56         | 69         | 49         |
| 53 | 70         | 100        | 100        | 105        | 104        | 106        | 109        | 125        | 125        |
| 54 | 65         | 83         | 85         | 90         | 100        | 101        | 89         | 115        | 110        |

|    |    |     |     |     |     |     |     |     |     |
|----|----|-----|-----|-----|-----|-----|-----|-----|-----|
| 1  |    |     |     |     |     |     |     |     |     |
| 2  | 59 | 79  | 87  | 94  | 97  | 94  | 94  | 115 | 125 |
| 3  | 74 | 98  | 105 | 109 | 106 | 100 | 110 | 129 | 127 |
| 4  | 50 | 73  | 84  | 92  | 87  | 75  | 87  | 86  | 93  |
| 5  | 53 | 81  | 75  | 57  | 57  | 74  | 49  | 78  | 65  |
| 6  | 74 | 100 | 103 | 105 | 109 | 109 | 117 | 131 | 130 |
| 7  | 70 | 97  | 105 | 102 | 104 | 98  | 120 | 124 | 127 |
| 8  |    |     |     |     |     |     |     |     |     |
| 9  |    |     |     |     |     |     |     |     |     |
| 10 |    |     |     |     |     |     |     |     |     |
| 11 |    |     |     |     |     |     |     |     |     |
| 12 |    |     |     |     |     |     |     |     |     |
| 13 |    |     |     |     |     |     |     |     |     |
| 14 |    |     |     |     |     |     |     |     |     |
| 15 |    |     |     |     |     |     |     |     |     |
| 16 |    |     |     |     |     |     |     |     |     |
| 17 |    |     |     |     |     |     |     |     |     |
| 18 |    |     |     |     |     |     |     |     |     |
| 19 |    |     |     |     |     |     |     |     |     |
| 20 |    |     |     |     |     |     |     |     |     |
| 21 |    |     |     |     |     |     |     |     |     |
| 22 |    |     |     |     |     |     |     |     |     |
| 23 |    |     |     |     |     |     |     |     |     |
| 24 |    |     |     |     |     |     |     |     |     |
| 25 |    |     |     |     |     |     |     |     |     |
| 26 |    |     |     |     |     |     |     |     |     |
| 27 |    |     |     |     |     |     |     |     |     |
| 28 |    |     |     |     |     |     |     |     |     |
| 29 |    |     |     |     |     |     |     |     |     |
| 30 |    |     |     |     |     |     |     |     |     |
| 31 |    |     |     |     |     |     |     |     |     |
| 32 |    |     |     |     |     |     |     |     |     |
| 33 |    |     |     |     |     |     |     |     |     |
| 34 |    |     |     |     |     |     |     |     |     |
| 35 |    |     |     |     |     |     |     |     |     |
| 36 |    |     |     |     |     |     |     |     |     |
| 37 |    |     |     |     |     |     |     |     |     |
| 38 |    |     |     |     |     |     |     |     |     |
| 39 |    |     |     |     |     |     |     |     |     |
| 40 |    |     |     |     |     |     |     |     |     |
| 41 |    |     |     |     |     |     |     |     |     |
| 42 |    |     |     |     |     |     |     |     |     |
| 43 |    |     |     |     |     |     |     |     |     |
| 44 |    |     |     |     |     |     |     |     |     |
| 45 |    |     |     |     |     |     |     |     |     |
| 46 |    |     |     |     |     |     |     |     |     |
| 47 |    |     |     |     |     |     |     |     |     |
| 48 |    |     |     |     |     |     |     |     |     |
| 49 |    |     |     |     |     |     |     |     |     |
| 50 |    |     |     |     |     |     |     |     |     |
| 51 |    |     |     |     |     |     |     |     |     |
| 52 |    |     |     |     |     |     |     |     |     |
| 53 |    |     |     |     |     |     |     |     |     |
| 54 |    |     |     |     |     |     |     |     |     |
| 55 |    |     |     |     |     |     |     |     |     |
| 56 |    |     |     |     |     |     |     |     |     |
| 57 |    |     |     |     |     |     |     |     |     |
| 58 |    |     |     |     |     |     |     |     |     |
| 59 |    |     |     |     |     |     |     |     |     |
| 60 |    |     |     |     |     |     |     |     |     |

For peer review only

1  
2  
3  
4  
5  
6  
7  
8  
9  
10  
11  
12  
13  
14  
15  
16  
17  
18  
19  
20  
21  
22  
23  
24  
25  
26  
27  
28  
29  
30  
31  
32  
33  
34  
35  
36  
37  
38  
39  
40  
41  
42  
43  
44  
45  
46  
47  
48  
49  
50  
51  
52  
53  
54  
55  
56  
57  
58  
59  
60

| <b>RAS</b> | <b>RFR</b> | <b>RAX</b> | <b>RWW</b> | <b>RM3</b> | <b>RQM</b> | <b>RVR</b> | <b>RJR</b> | <b>RC1</b> |
|------------|------------|------------|------------|------------|------------|------------|------------|------------|
| 137        | 138        | 143        | 149        | 150        | 157        | 170        | 175        | 187        |
| 111        | 121        | 113        | 114        | 133        | 112        | 120        | 130        | 136        |
| 60         | 67         | 62         | 62         | 90         | 62         | 55         | 61         | 85         |
| 25         | 24         | 15         | 24         | 29         | 32         | 12         | 25         | 35         |
| 71         | 72         | 92         | 77         | 92         | 70         | 66         | 82         | 129        |
| 128        | 132        | 132        | 136        | 146        | 149        | 154        | 163        | 179        |
| 121        | 122        | 112        | 129        | 132        | 134        | 139        | 150        | 160        |
| 136        | 137        | 142        | 147        | 146        | 154        | 166        | 172        | 187        |
| 101        | 104        | 108        | 105        | 102        | 110        | 128        | 127        | 133        |
| 113        | 117        | 116        | 120        | 130        | 140        | 136        | 156        | 158        |
| 67         | 68         | 78         | 77         | 97         | 61         | 76         | 76         | 100        |
| 28         | 27         | 18         | 28         | 36         | 36         | 15         | 30         | 41         |
| 115        | 117        | 125        | 126        | 128        | 128        | 135        | 155        | 165        |
| 128        | 133        | 132        | 135        | 143        | 144        | 155        | 164        | 174        |
| 79         | 83         | 100        | 89         | 112        | 88         | 83         | 89         | 119        |
| 79         | 81         | 100        | 88         | 112        | 87         | 83         | 89         | 119        |
| 133        | 134        | 133        | 143        | 145        | 150        | 154        | 166        | 179        |
| 56         | 54         | 49         | 36         | 49         | 73         | 57         | 61         | 58         |
| 79         | 83         | 100        | 89         | 110        | 87         | 82         | 89         | 117        |
| 128        | 122        | 122        | 129        | 121        | 138        | 147        | 155        | 167        |
| 87         | 85         | 92         | 94         | 106        | 98         | 92         | 113        | 128        |
| 102        | 109        | 98         | 106        | 106        | 117        | 109        | 110        | 139        |
| 71         | 72         | 94         | 80         | 93         | 71         | 64         | 82         | 130        |
| 78         | 83         | 100        | 89         | 112        | 87         | 83         | 88         | 118        |
| 116        | 116        | 122        | 128        | 128        | 130        | 133        | 157        | 163        |
| 108        | 111        | 96         | 111        | 114        | 110        | 118        | 134        | 149        |
| 128        | 129        | 134        | 140        | 140        | 150        | 161        | 169        | 176        |
| 65         | 75         | 77         | 77         | 95         | 73         | 67         | 69         | 104        |
| 60         | 58         | 53         | 40         | 55         | 77         | 61         | 68         | 65         |
| 81         | 84         | 68         | 86         | 90         | 93         | 85         | 92         | 105        |
| 73         | 79         | 96         | 84         | 105        | 76         | 76         | 83         | 112        |
| 135        | 136        | 144        | 151        | 148        | 154        | 161        | 172        | 184        |
| 114        | 117        | 124        | 125        | 129        | 124        | 129        | 156        | 165        |
| 79         | 83         | 100        | 89         | 111        | 87         | 82         | 87         | 117        |
| 105        | 114        | 97         | 105        | 114        | 111        | 134        | 131        | 122        |
| 59         | 57         | 53         | 63         | 62         | 70         | 51         | 54         | 67         |
| 38         | 51         | 36         | 40         | 64         | 43         | 35         | 44         | 45         |
| 76         | 83         | 95         | 86         | 106        | 79         | 79         | 86         | 111        |
| 79         | 81         | 99         | 86         | 111        | 88         | 83         | 89         | 119        |
| 64         | 85         | 56         | 85         | 92         | 73         | 66         | 74         | 78         |
| 137        | 135        | 145        | 145        | 147        | 156        | 163        | 171        | 181        |
| 108        | 125        | 108        | 111        | 116        | 115        | 140        | 133        | 122        |
| 66         | 79         | 45         | 77         | 86         | 68         | 54         | 63         | 80         |
| 130        | 133        | 124        | 140        | 138        | 139        | 158        | 163        | 170        |
| 115        | 110        | 116        | 111        | 135        | 136        | 130        | 139        | 157        |

|    |     |     |     |     |     |     |     |     |     |
|----|-----|-----|-----|-----|-----|-----|-----|-----|-----|
| 1  |     |     |     |     |     |     |     |     |     |
| 2  | 113 | 117 | 115 | 123 | 121 | 136 | 141 | 144 | 162 |
| 3  | 131 | 138 | 132 | 137 | 142 | 149 | 159 | 164 | 172 |
| 4  | 99  | 100 | 92  | 97  | 113 | 110 | 106 | 111 | 121 |
| 5  | 79  | 83  | 96  | 88  | 110 | 86  | 82  | 88  | 119 |
| 6  | 135 | 135 | 141 | 146 | 145 | 152 | 163 | 173 | 181 |
| 7  | 129 | 132 | 135 | 145 | 133 | 145 | 153 | 164 | 175 |
| 8  |     |     |     |     |     |     |     |     |     |
| 9  |     |     |     |     |     |     |     |     |     |
| 10 |     |     |     |     |     |     |     |     |     |
| 11 |     |     |     |     |     |     |     |     |     |
| 12 |     |     |     |     |     |     |     |     |     |
| 13 |     |     |     |     |     |     |     |     |     |
| 14 |     |     |     |     |     |     |     |     |     |
| 15 |     |     |     |     |     |     |     |     |     |
| 16 |     |     |     |     |     |     |     |     |     |
| 17 |     |     |     |     |     |     |     |     |     |
| 18 |     |     |     |     |     |     |     |     |     |
| 19 |     |     |     |     |     |     |     |     |     |
| 20 |     |     |     |     |     |     |     |     |     |
| 21 |     |     |     |     |     |     |     |     |     |
| 22 |     |     |     |     |     |     |     |     |     |
| 23 |     |     |     |     |     |     |     |     |     |
| 24 |     |     |     |     |     |     |     |     |     |
| 25 |     |     |     |     |     |     |     |     |     |
| 26 |     |     |     |     |     |     |     |     |     |
| 27 |     |     |     |     |     |     |     |     |     |
| 28 |     |     |     |     |     |     |     |     |     |
| 29 |     |     |     |     |     |     |     |     |     |
| 30 |     |     |     |     |     |     |     |     |     |
| 31 |     |     |     |     |     |     |     |     |     |
| 32 |     |     |     |     |     |     |     |     |     |
| 33 |     |     |     |     |     |     |     |     |     |
| 34 |     |     |     |     |     |     |     |     |     |
| 35 |     |     |     |     |     |     |     |     |     |
| 36 |     |     |     |     |     |     |     |     |     |
| 37 |     |     |     |     |     |     |     |     |     |
| 38 |     |     |     |     |     |     |     |     |     |
| 39 |     |     |     |     |     |     |     |     |     |
| 40 |     |     |     |     |     |     |     |     |     |
| 41 |     |     |     |     |     |     |     |     |     |
| 42 |     |     |     |     |     |     |     |     |     |
| 43 |     |     |     |     |     |     |     |     |     |
| 44 |     |     |     |     |     |     |     |     |     |
| 45 |     |     |     |     |     |     |     |     |     |
| 46 |     |     |     |     |     |     |     |     |     |
| 47 |     |     |     |     |     |     |     |     |     |
| 48 |     |     |     |     |     |     |     |     |     |
| 49 |     |     |     |     |     |     |     |     |     |
| 50 |     |     |     |     |     |     |     |     |     |
| 51 |     |     |     |     |     |     |     |     |     |
| 52 |     |     |     |     |     |     |     |     |     |
| 53 |     |     |     |     |     |     |     |     |     |
| 54 |     |     |     |     |     |     |     |     |     |
| 55 |     |     |     |     |     |     |     |     |     |
| 56 |     |     |     |     |     |     |     |     |     |
| 57 |     |     |     |     |     |     |     |     |     |
| 58 |     |     |     |     |     |     |     |     |     |
| 59 |     |     |     |     |     |     |     |     |     |
| 60 |     |     |     |     |     |     |     |     |     |

For peer review only

1  
2  
3  
4  
5  
6  
7  
8  
9  
10  
11  
12  
13  
14  
15  
16  
17  
18  
19  
20  
21  
22  
23  
24  
25  
26  
27  
28  
29  
30  
31  
32  
33  
34  
35  
36  
37  
38  
39  
40  
41  
42  
43  
44  
45  
46  
47  
48  
49  
50  
51  
52  
53  
54  
55  
56  
57  
58  
59  
60

| <b>RFF</b> | <b>RJ2</b> | <b>RA3</b> | <b>RBT</b> | <b>REN</b> | <b>RRF</b> | <b>RAP</b> | <b>RMC</b> | <b>RLQ</b> |
|------------|------------|------------|------------|------------|------------|------------|------------|------------|
| 189        | 191        | 197        | 209        | 208        | 209        | 208        | 214        | 213        |
| 150        | 157        | 150        | 168        | 170        | 161        | 180        | 170        | 169        |
| 84         | 87         | 57         | 74         | 89         | 81         | 80         | 101        | 68         |
| 27         | 33         | 20         | 22         | 135        | 25         | 77         | 36         | 43         |
| 99         | 96         | 94         | 119        | 59         | 119        | 88         | 138        | 109        |
| 168        | 187        | 182        | 197        | 204        | 196        | 203        | 205        | 204        |
| 148        | 179        | 177        | 184        | 201        | 173        | 188        | 184        | 185        |
| 187        | 191        | 190        | 205        | 204        | 205        | 208        | 211        | 213        |
| 137        | 145        | 150        | 154        | 173        | 146        | 134        | 134        | 165        |
| 159        | 176        | 157        | 171        | 183        | 181        | 180        | 192        | 190        |
| 93         | 91         | 72         | 93         | 94         | 101        | 95         | 116        | 82         |
| 28         | 36         | 27         | 25         | 160        | 30         | 81         | 51         | 49         |
| 154        | 164        | 163        | 185        | 178        | 177        | 167        | 189        | 160        |
| 173        | 188        | 186        | 194        | 201        | 201        | 203        | 204        | 200        |
| 118        | 106        | 91         | 109        | 110        | 120        | 106        | 139        | 102        |
| 118        | 106        | 88         | 111        | 110        | 123        | 106        | 139        | 102        |
| 174        | 189        | 188        | 202        | 203        | 192        | 203        | 203        | 212        |
| 76         | 117        | 94         | 66         | 88         | 72         | 132        | 64         | 74         |
| 118        | 107        | 90         | 111        | 110        | 121        | 106        | 139        | 102        |
| 158        | 177        | 168        | 181        | 177        | 183        | 187        | 191        | 187        |
| 117        | 133        | 117        | 125        | 158        | 137        | 155        | 137        | 149        |
| 129        | 146        | 140        | 142        | 169        | 150        | 159        | 162        | 147        |
| 102        | 95         | 94         | 122        | 57         | 123        | 86         | 139        | 112        |
| 118        | 107        | 91         | 111        | 110        | 121        | 108        | 140        | 102        |
| 152        | 164        | 164        | 185        | 175        | 175        | 169        | 190        | 161        |
| 143        | 138        | 144        | 154        | 167        | 171        | 168        | 159        | 166        |
| 180        | 180        | 186        | 199        | 202        | 202        | 202        | 205        | 215        |
| 88         | 95         | 81         | 98         | 95         | 110        | 86         | 120        | 88         |
| 82         | 125        | 97         | 73         | 95         | 83         | 145        | 75         | 83         |
| 114        | 140        | 115        | 121        | 152        | 127        | 156        | 145        | 131        |
| 105        | 98         | 82         | 104        | 102        | 112        | 100        | 133        | 95         |
| 182        | 191        | 192        | 199        | 205        | 205        | 210        | 214        | 214        |
| 151        | 159        | 165        | 185        | 174        | 176        | 167        | 187        | 164        |
| 118        | 107        | 89         | 110        | 109        | 118        | 107        | 139        | 102        |
| 126        | 147        | 142        | 156        | 159        | 143        | 179        | 158        | 150        |
| 79         | 103        | 78         | 80         | 84         | 77         | 129        | 75         | 86         |
| 68         | 62         | 50         | 64         | 97         | 62         | 89         | 63         | 62         |
| 112        | 105        | 89         | 102        | 107        | 115        | 99         | 137        | 100        |
| 118        | 107        | 90         | 110        | 110        | 120        | 105        | 138        | 101        |
| 108        | 105        | 68         | 112        | 114        | 119        | 131        | 109        | 126        |
| 185        | 189        | 192        | 203        | 208        | 206        | 208        | 213        | 219        |
| 136        | 152        | 147        | 163        | 159        | 148        | 178        | 159        | 156        |
| 109        | 119        | 99         | 94         | 119        | 107        | 142        | 105        | 99         |
| 175        | 178        | 177        | 191        | 200        | 198        | 194        | 207        | 200        |
| 140        | 168        | 152        | 169        | 167        | 173        | 188        | 173        | 166        |



|    |     |     |     |     |     |     |     |     |     |
|----|-----|-----|-----|-----|-----|-----|-----|-----|-----|
| 1  |     |     |     |     |     |     |     |     |     |
| 2  | 153 | 174 | 173 | 172 | 192 | 177 | 179 | 188 | 190 |
| 3  | 171 | 187 | 193 | 197 | 201 | 191 | 204 | 198 | 207 |
| 4  | 126 | 134 | 150 | 138 | 173 | 145 | 169 | 165 | 153 |
| 5  | 113 | 104 | 90  | 110 | 110 | 119 | 105 | 139 | 100 |
| 6  | 181 | 189 | 191 | 204 | 207 | 207 | 212 | 212 | 219 |
| 7  | 179 | 184 | 180 | 199 | 198 | 196 | 199 | 200 | 210 |
| 8  |     |     |     |     |     |     |     |     |     |
| 9  |     |     |     |     |     |     |     |     |     |
| 10 |     |     |     |     |     |     |     |     |     |
| 11 |     |     |     |     |     |     |     |     |     |
| 12 |     |     |     |     |     |     |     |     |     |
| 13 |     |     |     |     |     |     |     |     |     |
| 14 |     |     |     |     |     |     |     |     |     |
| 15 |     |     |     |     |     |     |     |     |     |
| 16 |     |     |     |     |     |     |     |     |     |
| 17 |     |     |     |     |     |     |     |     |     |
| 18 |     |     |     |     |     |     |     |     |     |
| 19 |     |     |     |     |     |     |     |     |     |
| 20 |     |     |     |     |     |     |     |     |     |
| 21 |     |     |     |     |     |     |     |     |     |
| 22 |     |     |     |     |     |     |     |     |     |
| 23 |     |     |     |     |     |     |     |     |     |
| 24 |     |     |     |     |     |     |     |     |     |
| 25 |     |     |     |     |     |     |     |     |     |
| 26 |     |     |     |     |     |     |     |     |     |
| 27 |     |     |     |     |     |     |     |     |     |
| 28 |     |     |     |     |     |     |     |     |     |
| 29 |     |     |     |     |     |     |     |     |     |
| 30 |     |     |     |     |     |     |     |     |     |
| 31 |     |     |     |     |     |     |     |     |     |
| 32 |     |     |     |     |     |     |     |     |     |
| 33 |     |     |     |     |     |     |     |     |     |
| 34 |     |     |     |     |     |     |     |     |     |
| 35 |     |     |     |     |     |     |     |     |     |
| 36 |     |     |     |     |     |     |     |     |     |
| 37 |     |     |     |     |     |     |     |     |     |
| 38 |     |     |     |     |     |     |     |     |     |
| 39 |     |     |     |     |     |     |     |     |     |
| 40 |     |     |     |     |     |     |     |     |     |
| 41 |     |     |     |     |     |     |     |     |     |
| 42 |     |     |     |     |     |     |     |     |     |
| 43 |     |     |     |     |     |     |     |     |     |
| 44 |     |     |     |     |     |     |     |     |     |
| 45 |     |     |     |     |     |     |     |     |     |
| 46 |     |     |     |     |     |     |     |     |     |
| 47 |     |     |     |     |     |     |     |     |     |
| 48 |     |     |     |     |     |     |     |     |     |
| 49 |     |     |     |     |     |     |     |     |     |
| 50 |     |     |     |     |     |     |     |     |     |
| 51 |     |     |     |     |     |     |     |     |     |
| 52 |     |     |     |     |     |     |     |     |     |
| 53 |     |     |     |     |     |     |     |     |     |
| 54 |     |     |     |     |     |     |     |     |     |
| 55 |     |     |     |     |     |     |     |     |     |
| 56 |     |     |     |     |     |     |     |     |     |
| 57 |     |     |     |     |     |     |     |     |     |
| 58 |     |     |     |     |     |     |     |     |     |
| 59 |     |     |     |     |     |     |     |     |     |
| 60 |     |     |     |     |     |     |     |     |     |

For peer review only

1  
2  
3  
4  
5  
6  
7  
8  
9  
10  
11  
12  
13  
14  
15  
16  
17  
18  
19  
20  
21  
22  
23  
24  
25  
26  
27  
28  
29  
30  
31  
32  
33  
34  
35  
36  
37  
38  
39  
40  
41  
42  
43  
44  
45  
46  
47  
48  
49  
50  
51  
52  
53  
54  
55  
56  
57  
58  
59  
60

| <b>RLT</b> | <b>RDZ</b> | <b>RBK</b> | <b>RQQ</b> | <b>RBN</b> | <b>RDD</b> | <b>RFS</b> | <b>RTK</b> | <b>RCF</b> |
|------------|------------|------------|------------|------------|------------|------------|------------|------------|
| 241        | 243        | 247        | 247        | 249        | 248        | 254        | 257        | 272        |
| 198        | 190        | 200        | 197        | 197        | 185        | 202        | 203        | 215        |
| 88         | 125        | 125        | 80         | 129        | 108        | 115        | 95         | 114        |
| 58         | 52         | 43         | 31         | 21         | 30         | 39         | 25         | 40         |
| 106        | 196        | 134        | 109        | 195        | 118        | 132        | 133        | 132        |
| 231        | 232        | 234        | 234        | 224        | 238        | 244        | 236        | 262        |
| 214        | 208        | 225        | 217        | 196        | 217        | 218        | 225        | 234        |
| 232        | 237        | 242        | 245        | 248        | 248        | 253        | 255        | 265        |
| 184        | 177        | 164        | 197        | 195        | 170        | 186        | 175        | 213        |
| 205        | 219        | 214        | 213        | 211        | 212        | 216        | 218        | 230        |
| 102        | 138        | 135        | 99         | 158        | 117        | 125        | 125        | 128        |
| 67         | 54         | 48         | 38         | 26         | 33         | 45         | 31         | 50         |
| 201        | 217        | 219        | 208        | 215        | 204        | 212        | 211        | 233        |
| 228        | 232        | 232        | 232        | 231        | 231        | 238        | 238        | 259        |
| 121        | 179        | 155        | 118        | 187        | 141        | 153        | 145        | 165        |
| 122        | 179        | 154        | 118        | 190        | 141        | 152        | 144        | 166        |
| 228        | 240        | 235        | 234        | 232        | 236        | 241        | 251        | 263        |
| 134        | 87         | 134        | 119        | 57         | 103        | 102        | 91         | 149        |
| 122        | 179        | 154        | 120        | 187        | 143        | 153        | 145        | 166        |
| 207        | 207        | 211        | 213        | 207        | 219        | 222        | 228        | 227        |
| 158        | 146        | 162        | 177        | 163        | 151        | 162        | 160        | 167        |
| 192        | 173        | 185        | 185        | 174        | 184        | 193        | 160        | 213        |
| 104        | 194        | 135        | 111        | 197        | 117        | 132        | 135        | 136        |
| 122        | 180        | 155        | 118        | 188        | 142        | 153        | 145        | 165        |
| 198        | 218        | 216        | 208        | 217        | 206        | 211        | 207        | 230        |
| 174        | 196        | 183        | 192        | 186        | 197        | 190        | 199        | 206        |
| 228        | 233        | 232        | 239        | 236        | 234        | 240        | 250        | 259        |
| 104        | 157        | 139        | 105        | 165        | 121        | 136        | 121        | 134        |
| 140        | 94         | 148        | 134        | 64         | 109        | 111        | 104        | 167        |
| 163        | 145        | 169        | 152        | 142        | 158        | 147        | 154        | 166        |
| 114        | 172        | 146        | 108        | 180        | 131        | 144        | 131        | 151        |
| 236        | 241        | 244        | 241        | 250        | 242        | 255        | 252        | 271        |
| 197        | 216        | 216        | 207        | 217        | 200        | 209        | 206        | 226        |
| 120        | 179        | 153        | 119        | 188        | 142        | 151        | 145        | 165        |
| 192        | 191        | 178        | 198        | 169        | 164        | 157        | 190        | 172        |
| 113        | 95         | 131        | 90         | 104        | 104        | 111        | 107        | 111        |
| 64         | 72         | 72         | 74         | 77         | 83         | 87         | 70         | 94         |
| 116        | 177        | 150        | 110        | 183        | 131        | 144        | 138        | 156        |
| 122        | 179        | 155        | 118        | 188        | 143        | 152        | 144        | 163        |
| 102        | 133        | 120        | 140        | 132        | 131        | 148        | 114        | 159        |
| 233        | 242        | 245        | 242        | 244        | 244        | 250        | 256        | 272        |
| 193        | 194        | 189        | 197        | 181        | 177        | 165        | 200        | 185        |
| 132        | 97         | 168        | 129        | 123        | 123        | 115        | 107        | 132        |
| 226        | 234        | 229        | 228        | 231        | 231        | 233        | 242        | 244        |
| 187        | 196        | 183        | 197        | 195        | 206        | 189        | 214        | 205        |

|    |     |     |     |     |     |     |     |     |     |
|----|-----|-----|-----|-----|-----|-----|-----|-----|-----|
| 1  |     |     |     |     |     |     |     |     |     |
| 2  | 212 | 201 | 210 | 222 | 204 | 196 | 218 | 204 | 250 |
| 3  | 231 | 240 | 235 | 235 | 232 | 227 | 235 | 245 | 254 |
| 4  | 170 | 174 | 209 | 179 | 167 | 176 | 174 | 172 | 215 |
| 5  | 119 | 177 | 153 | 118 | 186 | 140 | 153 | 145 | 163 |
| 6  | 234 | 241 | 240 | 241 | 243 | 239 | 250 | 256 | 268 |
| 7  | 227 | 235 | 235 | 234 | 231 | 232 | 243 | 247 | 259 |
| 8  |     |     |     |     |     |     |     |     |     |
| 9  |     |     |     |     |     |     |     |     |     |
| 10 |     |     |     |     |     |     |     |     |     |
| 11 |     |     |     |     |     |     |     |     |     |
| 12 |     |     |     |     |     |     |     |     |     |
| 13 |     |     |     |     |     |     |     |     |     |
| 14 |     |     |     |     |     |     |     |     |     |
| 15 |     |     |     |     |     |     |     |     |     |
| 16 |     |     |     |     |     |     |     |     |     |
| 17 |     |     |     |     |     |     |     |     |     |
| 18 |     |     |     |     |     |     |     |     |     |
| 19 |     |     |     |     |     |     |     |     |     |
| 20 |     |     |     |     |     |     |     |     |     |
| 21 |     |     |     |     |     |     |     |     |     |
| 22 |     |     |     |     |     |     |     |     |     |
| 23 |     |     |     |     |     |     |     |     |     |
| 24 |     |     |     |     |     |     |     |     |     |
| 25 |     |     |     |     |     |     |     |     |     |
| 26 |     |     |     |     |     |     |     |     |     |
| 27 |     |     |     |     |     |     |     |     |     |
| 28 |     |     |     |     |     |     |     |     |     |
| 29 |     |     |     |     |     |     |     |     |     |
| 30 |     |     |     |     |     |     |     |     |     |
| 31 |     |     |     |     |     |     |     |     |     |
| 32 |     |     |     |     |     |     |     |     |     |
| 33 |     |     |     |     |     |     |     |     |     |
| 34 |     |     |     |     |     |     |     |     |     |
| 35 |     |     |     |     |     |     |     |     |     |
| 36 |     |     |     |     |     |     |     |     |     |
| 37 |     |     |     |     |     |     |     |     |     |
| 38 |     |     |     |     |     |     |     |     |     |
| 39 |     |     |     |     |     |     |     |     |     |
| 40 |     |     |     |     |     |     |     |     |     |
| 41 |     |     |     |     |     |     |     |     |     |
| 42 |     |     |     |     |     |     |     |     |     |
| 43 |     |     |     |     |     |     |     |     |     |
| 44 |     |     |     |     |     |     |     |     |     |
| 45 |     |     |     |     |     |     |     |     |     |
| 46 |     |     |     |     |     |     |     |     |     |
| 47 |     |     |     |     |     |     |     |     |     |
| 48 |     |     |     |     |     |     |     |     |     |
| 49 |     |     |     |     |     |     |     |     |     |
| 50 |     |     |     |     |     |     |     |     |     |
| 51 |     |     |     |     |     |     |     |     |     |
| 52 |     |     |     |     |     |     |     |     |     |
| 53 |     |     |     |     |     |     |     |     |     |
| 54 |     |     |     |     |     |     |     |     |     |
| 55 |     |     |     |     |     |     |     |     |     |
| 56 |     |     |     |     |     |     |     |     |     |
| 57 |     |     |     |     |     |     |     |     |     |
| 58 |     |     |     |     |     |     |     |     |     |
| 59 |     |     |     |     |     |     |     |     |     |
| 60 |     |     |     |     |     |     |     |     |     |

For peer review only

1  
2  
3  
4  
5  
6  
7  
8  
9  
10  
11  
12  
13  
14  
15  
16  
17  
18  
19  
20  
21  
22  
23  
24  
25  
26  
27  
28  
29  
30  
31  
32  
33  
34  
35  
36  
37  
38  
39  
40  
41  
42  
43  
44  
45  
46  
47  
48  
49  
50  
51  
52  
53  
54  
55  
56  
57  
58  
59  
60

| <b>RWG</b> | <b>REM</b> | <b>RJF</b> | <b>RQW</b> | <b>RCB</b> | <b>RF4</b> | <b>RK5</b> | <b>RCD</b> | <b>RBZ</b> |
|------------|------------|------------|------------|------------|------------|------------|------------|------------|
| 274        | 279        | 274        | 282        | 285        | 282        | 290        | 294        | 296        |
| 210        | 224        | 223        | 227        | 228        | 216        | 234        | 229        | 229        |
| 118        | 142        | 129        | 120        | 162        | 136        | 155        | 116        | 120        |
| 35         | 68         | 40         | 41         | 46         | 115        | 36         | 47         | 46         |
| 182        | 176        | 155        | 144        | 211        | 171        | 193        | 144        | 162        |
| 245        | 267        | 262        | 272        | 276        | 271        | 275        | 281        | 278        |
| 217        | 254        | 244        | 239        | 252        | 259        | 250        | 248        | 259        |
| 270        | 271        | 272        | 280        | 284        | 278        | 283        | 293        | 288        |
| 193        | 176        | 210        | 224        | 219        | 192        | 221        | 204        | 247        |
| 234        | 246        | 236        | 241        | 252        | 244        | 249        | 259        | 249        |
| 149        | 161        | 148        | 140        | 184        | 148        | 170        | 130        | 147        |
| 39         | 81         | 49         | 51         | 52         | 128        | 41         | 55         | 59         |
| 235        | 243        | 245        | 258        | 257        | 256        | 264        | 256        | 251        |
| 250        | 259        | 261        | 265        | 273        | 270        | 276        | 278        | 279        |
| 183        | 191        | 179        | 170        | 228        | 182        | 209        | 160        | 170        |
| 187        | 191        | 178        | 168        | 229        | 181        | 209        | 159        | 171        |
| 256        | 272        | 270        | 264        | 280        | 277        | 279        | 288        | 280        |
| 65         | 79         | 146        | 129        | 121        | 128        | 94         | 118        | 154        |
| 185        | 191        | 179        | 171        | 227        | 183        | 207        | 160        | 171        |
| 240        | 231        | 246        | 256        | 256        | 243        | 260        | 246        | 252        |
| 182        | 176        | 192        | 185        | 193        | 168        | 190        | 203        | 236        |
| 168        | 195        | 212        | 217        | 203        | 211        | 208        | 210        | 189        |
| 183        | 181        | 156        | 141        | 213        | 171        | 195        | 145        | 160        |
| 186        | 191        | 179        | 167        | 229        | 183        | 208        | 160        | 170        |
| 235        | 242        | 244        | 255        | 255        | 254        | 261        | 257        | 249        |
| 205        | 203        | 211        | 220        | 222        | 215        | 233        | 213        | 230        |
| 260        | 265        | 269        | 277        | 278        | 271        | 277        | 278        | 285        |
| 163        | 164        | 152        | 138        | 210        | 153        | 187        | 138        | 155        |
| 76         | 93         | 161        | 157        | 132        | 144        | 106        | 133        | 162        |
| 157        | 181        | 183        | 173        | 183        | 187        | 165        | 186        | 178        |
| 176        | 179        | 170        | 160        | 220        | 170        | 194        | 149        | 160        |
| 270        | 273        | 273        | 282        | 283        | 284        | 292        | 289        | 291        |
| 234        | 240        | 244        | 255        | 254        | 250        | 263        | 259        | 248        |
| 184        | 190        | 177        | 171        | 228        | 181        | 208        | 160        | 171        |
| 200        | 198        | 186        | 213        | 212        | 220        | 213        | 233        | 222        |
| 111        | 107        | 124        | 117        | 131        | 160        | 121        | 140        | 117        |
| 82         | 101        | 81         | 70         | 83         | 101        | 71         | 91         | 87         |
| 176        | 188        | 165        | 162        | 224        | 173        | 201        | 156        | 170        |
| 185        | 190        | 179        | 171        | 227        | 182        | 206        | 159        | 168        |
| 139        | 169        | 153        | 146        | 136        | 153        | 133        | 166        | 152        |
| 270        | 273        | 270        | 281        | 285        | 283        | 285        | 293        | 290        |
| 210        | 210        | 193        | 228        | 223        | 232        | 219        | 247        | 236        |
| 113        | 165        | 150        | 137        | 137        | 161        | 146        | 153        | 128        |
| 254        | 255        | 263        | 262        | 266        | 270        | 278        | 274        | 267        |
| 239        | 222        | 251        | 251        | 238        | 225        | 243        | 243        | 267        |

|    |     |     |     |     |     |     |     |     |     |
|----|-----|-----|-----|-----|-----|-----|-----|-----|-----|
| 1  |     |     |     |     |     |     |     |     |     |
| 2  | 204 | 245 | 240 | 263 | 233 | 251 | 246 | 254 | 251 |
| 3  | 262 | 266 | 261 | 264 | 272 | 279 | 283 | 286 | 279 |
| 4  | 198 | 202 | 185 | 203 | 211 | 203 | 205 | 228 | 200 |
| 5  | 185 | 191 | 177 | 167 | 225 | 181 | 208 | 158 | 170 |
| 6  | 264 | 274 | 269 | 282 | 284 | 276 | 286 | 290 | 292 |
| 7  | 259 | 260 | 262 | 269 | 274 | 272 | 275 | 271 | 282 |
| 8  |     |     |     |     |     |     |     |     |     |
| 9  |     |     |     |     |     |     |     |     |     |
| 10 |     |     |     |     |     |     |     |     |     |
| 11 |     |     |     |     |     |     |     |     |     |
| 12 |     |     |     |     |     |     |     |     |     |
| 13 |     |     |     |     |     |     |     |     |     |
| 14 |     |     |     |     |     |     |     |     |     |
| 15 |     |     |     |     |     |     |     |     |     |
| 16 |     |     |     |     |     |     |     |     |     |
| 17 |     |     |     |     |     |     |     |     |     |
| 18 |     |     |     |     |     |     |     |     |     |
| 19 |     |     |     |     |     |     |     |     |     |
| 20 |     |     |     |     |     |     |     |     |     |
| 21 |     |     |     |     |     |     |     |     |     |
| 22 |     |     |     |     |     |     |     |     |     |
| 23 |     |     |     |     |     |     |     |     |     |
| 24 |     |     |     |     |     |     |     |     |     |
| 25 |     |     |     |     |     |     |     |     |     |
| 26 |     |     |     |     |     |     |     |     |     |
| 27 |     |     |     |     |     |     |     |     |     |
| 28 |     |     |     |     |     |     |     |     |     |
| 29 |     |     |     |     |     |     |     |     |     |
| 30 |     |     |     |     |     |     |     |     |     |
| 31 |     |     |     |     |     |     |     |     |     |
| 32 |     |     |     |     |     |     |     |     |     |
| 33 |     |     |     |     |     |     |     |     |     |
| 34 |     |     |     |     |     |     |     |     |     |
| 35 |     |     |     |     |     |     |     |     |     |
| 36 |     |     |     |     |     |     |     |     |     |
| 37 |     |     |     |     |     |     |     |     |     |
| 38 |     |     |     |     |     |     |     |     |     |
| 39 |     |     |     |     |     |     |     |     |     |
| 40 |     |     |     |     |     |     |     |     |     |
| 41 |     |     |     |     |     |     |     |     |     |
| 42 |     |     |     |     |     |     |     |     |     |
| 43 |     |     |     |     |     |     |     |     |     |
| 44 |     |     |     |     |     |     |     |     |     |
| 45 |     |     |     |     |     |     |     |     |     |
| 46 |     |     |     |     |     |     |     |     |     |
| 47 |     |     |     |     |     |     |     |     |     |
| 48 |     |     |     |     |     |     |     |     |     |
| 49 |     |     |     |     |     |     |     |     |     |
| 50 |     |     |     |     |     |     |     |     |     |
| 51 |     |     |     |     |     |     |     |     |     |
| 52 |     |     |     |     |     |     |     |     |     |
| 53 |     |     |     |     |     |     |     |     |     |
| 54 |     |     |     |     |     |     |     |     |     |
| 55 |     |     |     |     |     |     |     |     |     |
| 56 |     |     |     |     |     |     |     |     |     |
| 57 |     |     |     |     |     |     |     |     |     |
| 58 |     |     |     |     |     |     |     |     |     |
| 59 |     |     |     |     |     |     |     |     |     |
| 60 |     |     |     |     |     |     |     |     |     |

For peer review only

1  
2  
3  
4  
5  
6  
7  
8  
9  
10  
11  
12  
13  
14  
15  
16  
17  
18  
19  
20  
21  
22  
23  
24  
25  
26  
27  
28  
29  
30  
31  
32  
33  
34  
35  
36  
37  
38  
39  
40  
41  
42  
43  
44  
45  
46  
47  
48  
49  
50  
51  
52  
53  
54  
55  
56  
57  
58  
59  
60

| <b>RTP</b> | <b>RWJ</b> | <b>RC9</b> | <b>RGP</b> | <b>RD8</b> | <b>RBD</b> | <b>RNQ</b> | <b>RP5</b> | <b>RVJ</b> |
|------------|------------|------------|------------|------------|------------|------------|------------|------------|
| 306        | 305        | 306        | 308        | 315        | 321        | 324        | 337        | 350        |
| 237        | 227        | 251        | 251        | 249        | 256        | 263        | 274        | 290        |
| 95         | 165        | 122        | 133        | 127        | 116        | 141        | 150        | 172        |
| 79         | 47         | 55         | 45         | 44         | 39         | 69         | 44         | 82         |
| 159        | 205        | 182        | 142        | 161        | 164        | 175        | 174        | 275        |
| 294        | 285        | 294        | 295        | 306        | 299        | 307        | 313        | 335        |
| 272        | 260        | 272        | 268        | 288        | 270        | 288        | 292        | 304        |
| 306        | 304        | 302        | 308        | 312        | 315        | 320        | 331        | 345        |
| 230        | 259        | 212        | 239        | 235        | 238        | 224        | 243        | 254        |
| 266        | 272        | 278        | 255        | 267        | 262        | 278        | 289        | 311        |
| 117        | 182        | 155        | 160        | 148        | 135        | 152        | 179        | 202        |
| 96         | 50         | 59         | 59         | 56         | 49         | 79         | 53         | 95         |
| 269        | 269        | 271        | 279        | 269        | 272        | 288        | 289        | 310        |
| 298        | 283        | 298        | 294        | 303        | 293        | 311        | 319        | 335        |
| 149        | 227        | 182        | 184        | 181        | 166        | 191        | 216        | 241        |
| 147        | 225        | 182        | 182        | 183        | 167        | 191        | 215        | 244        |
| 299        | 294        | 297        | 292        | 302        | 303        | 313        | 318        | 333        |
| 147        | 66         | 139        | 133        | 178        | 128        | 165        | 106        | 74         |
| 150        | 227        | 182        | 184        | 183        | 167        | 192        | 215        | 243        |
| 276        | 263        | 273        | 265        | 274        | 272        | 277        | 293        | 311        |
| 198        | 205        | 201        | 206        | 221        | 225        | 208        | 219        | 234        |
| 224        | 194        | 223        | 226        | 232        | 234        | 249        | 235        | 244        |
| 158        | 208        | 184        | 141        | 164        | 164        | 174        | 177        | 277        |
| 150        | 226        | 182        | 183        | 183        | 166        | 191        | 213        | 244        |
| 267        | 267        | 271        | 281        | 269        | 274        | 290        | 286        | 309        |
| 230        | 238        | 247        | 236        | 227        | 247        | 250        | 249        | 269        |
| 289        | 291        | 303        | 298        | 306        | 309        | 313        | 320        | 327        |
| 121        | 192        | 163        | 159        | 157        | 144        | 171        | 202        | 219        |
| 163        | 71         | 158        | 152        | 192        | 142        | 184        | 122        | 85         |
| 193        | 182        | 216        | 195        | 221        | 193        | 209        | 200        | 235        |
| 133        | 213        | 169        | 171        | 173        | 156        | 173        | 195        | 233        |
| 302        | 298        | 308        | 307        | 313        | 316        | 320        | 336        | 341        |
| 270        | 266        | 268        | 281        | 266        | 271        | 286        | 279        | 302        |
| 150        | 225        | 181        | 183        | 182        | 165        | 190        | 213        | 243        |
| 234        | 224        | 249        | 215        | 212        | 242        | 237        | 236        | 259        |
| 136        | 112        | 150        | 125        | 155        | 137        | 136        | 144        | 148        |
| 75         | 108        | 121        | 86         | 90         | 98         | 83         | 119        | 109        |
| 141        | 216        | 173        | 170        | 172        | 160        | 185        | 202        | 236        |
| 149        | 225        | 180        | 182        | 180        | 166        | 190        | 215        | 240        |
| 148        | 165        | 199        | 159        | 135        | 173        | 151        | 210        | 151        |
| 303        | 298        | 306        | 305        | 313        | 314        | 323        | 329        | 344        |
| 239        | 231        | 260        | 223        | 217        | 252        | 258        | 248        | 263        |
| 130        | 128        | 168        | 175        | 159        | 169        | 164        | 177        | 144        |
| 289        | 282        | 285        | 292        | 299        | 299        | 298        | 323        | 335        |
| 273        | 268        | 274        | 232        | 272        | 253        | 267        | 262        | 291        |

|    |     |     |     |     |     |     |     |     |     |
|----|-----|-----|-----|-----|-----|-----|-----|-----|-----|
| 1  |     |     |     |     |     |     |     |     |     |
| 2  | 277 | 233 | 273 | 272 | 273 | 259 | 277 | 276 | 281 |
| 3  | 293 | 289 | 299 | 284 | 296 | 307 | 315 | 319 | 330 |
| 4  | 209 | 201 | 239 | 234 | 233 | 226 | 239 | 249 | 282 |
| 5  | 149 | 222 | 178 | 181 | 182 | 164 | 187 | 215 | 238 |
| 6  | 304 | 298 | 302 | 298 | 309 | 314 | 317 | 331 | 340 |
| 7  | 292 | 285 | 290 | 292 | 298 | 302 | 312 | 318 | 329 |
| 8  |     |     |     |     |     |     |     |     |     |
| 9  |     |     |     |     |     |     |     |     |     |
| 10 |     |     |     |     |     |     |     |     |     |
| 11 |     |     |     |     |     |     |     |     |     |
| 12 |     |     |     |     |     |     |     |     |     |
| 13 |     |     |     |     |     |     |     |     |     |
| 14 |     |     |     |     |     |     |     |     |     |
| 15 |     |     |     |     |     |     |     |     |     |
| 16 |     |     |     |     |     |     |     |     |     |
| 17 |     |     |     |     |     |     |     |     |     |
| 18 |     |     |     |     |     |     |     |     |     |
| 19 |     |     |     |     |     |     |     |     |     |
| 20 |     |     |     |     |     |     |     |     |     |
| 21 |     |     |     |     |     |     |     |     |     |
| 22 |     |     |     |     |     |     |     |     |     |
| 23 |     |     |     |     |     |     |     |     |     |
| 24 |     |     |     |     |     |     |     |     |     |
| 25 |     |     |     |     |     |     |     |     |     |
| 26 |     |     |     |     |     |     |     |     |     |
| 27 |     |     |     |     |     |     |     |     |     |
| 28 |     |     |     |     |     |     |     |     |     |
| 29 |     |     |     |     |     |     |     |     |     |
| 30 |     |     |     |     |     |     |     |     |     |
| 31 |     |     |     |     |     |     |     |     |     |
| 32 |     |     |     |     |     |     |     |     |     |
| 33 |     |     |     |     |     |     |     |     |     |
| 34 |     |     |     |     |     |     |     |     |     |
| 35 |     |     |     |     |     |     |     |     |     |
| 36 |     |     |     |     |     |     |     |     |     |
| 37 |     |     |     |     |     |     |     |     |     |
| 38 |     |     |     |     |     |     |     |     |     |
| 39 |     |     |     |     |     |     |     |     |     |
| 40 |     |     |     |     |     |     |     |     |     |
| 41 |     |     |     |     |     |     |     |     |     |
| 42 |     |     |     |     |     |     |     |     |     |
| 43 |     |     |     |     |     |     |     |     |     |
| 44 |     |     |     |     |     |     |     |     |     |
| 45 |     |     |     |     |     |     |     |     |     |
| 46 |     |     |     |     |     |     |     |     |     |
| 47 |     |     |     |     |     |     |     |     |     |
| 48 |     |     |     |     |     |     |     |     |     |
| 49 |     |     |     |     |     |     |     |     |     |
| 50 |     |     |     |     |     |     |     |     |     |
| 51 |     |     |     |     |     |     |     |     |     |
| 52 |     |     |     |     |     |     |     |     |     |
| 53 |     |     |     |     |     |     |     |     |     |
| 54 |     |     |     |     |     |     |     |     |     |
| 55 |     |     |     |     |     |     |     |     |     |
| 56 |     |     |     |     |     |     |     |     |     |
| 57 |     |     |     |     |     |     |     |     |     |
| 58 |     |     |     |     |     |     |     |     |     |
| 59 |     |     |     |     |     |     |     |     |     |
| 60 |     |     |     |     |     |     |     |     |     |

For peer review only

1  
2  
3  
4  
5  
6  
7  
8  
9  
10  
11  
12  
13  
14  
15  
16  
17  
18  
19  
20  
21  
22  
23  
24  
25  
26  
27  
28  
29  
30  
31  
32  
33  
34  
35  
36  
37  
38  
39  
40  
41  
42  
43  
44  
45  
46  
47  
48  
49  
50  
51  
52  
53  
54  
55  
56  
57  
58  
59  
60

|    | <b>RW3</b> | <b>RJC</b> | <b>RAE</b> | <b>RBL</b> | <b>RGR</b> | <b>RQ6</b> | <b>R1K</b> | <b>RN7</b> | <b>RHW</b> |
|----|------------|------------|------------|------------|------------|------------|------------|------------|------------|
| 10 | 349        | 347        | 372        | 377        | 383        | 387        | 390        | 395        | 394        |
| 11 | 290        | 270        | 299        | 287        | 286        | 321        | 297        | 312        | 319        |
| 12 | 174        | 126        | 205        | 172        | 151        | 177        | 166        | 152        | 180        |
| 13 | 47         | 59         | 51         | 80         | 63         | 98         | 66         | 61         | 189        |
| 14 | 169        | 161        | 247        | 205        | 209        | 217        | 214        | 181        | 236        |
| 15 | 329        | 335        | 353        | 349        | 355        | 377        | 366        | 376        | 389        |
| 16 | 292        | 312        | 334        | 311        | 331        | 360        | 340        | 345        | 366        |
| 17 | 342        | 341        | 368        | 367        | 374        | 385        | 384        | 387        | 395        |
| 18 | 247        | 235        | 262        | 282        | 283        | 259        | 263        | 264        | 273        |
| 19 | 296        | 292        | 312        | 338        | 325        | 359        | 336        | 341        | 357        |
| 20 | 200        | 146        | 222        | 183        | 179        | 200        | 189        | 178        | 220        |
| 21 | 51         | 66         | 56         | 93         | 69         | 110        | 69         | 71         | 219        |
| 22 | 274        | 283        | 320        | 331        | 321        | 300        | 329        | 327        | 361        |
| 23 | 317        | 338        | 350        | 352        | 356        | 369        | 362        | 373        | 387        |
| 24 | 232        | 180        | 268        | 239        | 227        | 241        | 221        | 205        | 257        |
| 25 | 232        | 182        | 272        | 243        | 227        | 242        | 223        | 204        | 258        |
| 26 | 327        | 338        | 352        | 350        | 365        | 375        | 369        | 366        | 395        |
| 27 | 124        | 189        | 143        | 103        | 177        | 92         | 174        | 179        | 152        |
| 28 | 231        | 181        | 272        | 244        | 227        | 240        | 223        | 206        | 258        |
| 29 | 296        | 306        | 334        | 341        | 345        | 343        | 330        | 347        | 350        |
| 30 | 220        | 238        | 232        | 244        | 264        | 245        | 256        | 260        | 284        |
| 31 | 240        | 268        | 268        | 269        | 265        | 280        | 280        | 273        | 293        |
| 32 | 169        | 161        | 249        | 211        | 211        | 218        | 214        | 183        | 236        |
| 33 | 232        | 180        | 271        | 242        | 227        | 240        | 226        | 206        | 259        |
| 34 | 267        | 283        | 320        | 332        | 315        | 298        | 327        | 323        | 360        |
| 35 | 256        | 271        | 284        | 299        | 289        | 311        | 285        | 295        | 297        |
| 36 | 333        | 330        | 361        | 358        | 368        | 377        | 364        | 380        | 390        |
| 37 | 208        | 148        | 243        | 205        | 187        | 217        | 193        | 176        | 219        |
| 38 | 132        | 208        | 153        | 118        | 195        | 101        | 185        | 203        | 174        |
| 39 | 225        | 225        | 246        | 214        | 222        | 251        | 251        | 237        | 274        |
| 40 | 213        | 171        | 243        | 234        | 216        | 230        | 210        | 191        | 241        |
| 41 | 341        | 341        | 368        | 366        | 375        | 384        | 387        | 380        | 395        |
| 42 | 273        | 283        | 315        | 330        | 320        | 295        | 324        | 321        | 356        |
| 43 | 231        | 180        | 269        | 243        | 226        | 240        | 223        | 205        | 259        |
| 44 | 269        | 252        | 245        | 255        | 271        | 293        | 284        | 274        | 304        |
| 45 | 155        | 171        | 169        | 138        | 147        | 160        | 200        | 174        | 183        |
| 46 | 114        | 80         | 129        | 107        | 100        | 130        | 143        | 109        | 129        |
| 47 | 219        | 179        | 263        | 233        | 215        | 236        | 213        | 195        | 248        |
| 48 | 232        | 179        | 269        | 243        | 226        | 241        | 222        | 206        | 256        |
| 49 | 192        | 141        | 208        | 175        | 160        | 210        | 213        | 209        | 216        |
| 50 | 342        | 348        | 364        | 374        | 376        | 387        | 377        | 389        | 398        |
| 51 | 282        | 256        | 250        | 265        | 283        | 315        | 298        | 295        | 325        |
| 52 | 198        | 179        | 210        | 166        | 164        | 211        | 211        | 187        | 170        |
| 53 | 322        | 326        | 354        | 352        | 348        | 370        | 339        | 367        | 361        |
| 54 | 287        | 280        | 283        | 301        | 308        | 337        | 336        | 338        | 341        |



|    |     |     |     |     |     |     |     |     |     |
|----|-----|-----|-----|-----|-----|-----|-----|-----|-----|
| 1  |     |     |     |     |     |     |     |     |     |
| 2  | 274 | 317 | 323 | 327 | 331 | 337 | 320 | 338 | 347 |
| 3  | 334 | 333 | 345 | 351 | 360 | 372 | 364 | 365 | 383 |
| 4  | 247 | 265 | 280 | 264 | 243 | 272 | 278 | 262 | 296 |
| 5  | 229 | 180 | 266 | 241 | 224 | 239 | 218 | 205 | 256 |
| 6  | 345 | 344 | 364 | 371 | 374 | 385 | 378 | 383 | 396 |
| 7  | 330 | 327 | 348 | 354 | 369 | 368 | 354 | 373 | 387 |
| 8  |     |     |     |     |     |     |     |     |     |
| 9  |     |     |     |     |     |     |     |     |     |
| 10 |     |     |     |     |     |     |     |     |     |
| 11 |     |     |     |     |     |     |     |     |     |
| 12 |     |     |     |     |     |     |     |     |     |
| 13 |     |     |     |     |     |     |     |     |     |
| 14 |     |     |     |     |     |     |     |     |     |
| 15 |     |     |     |     |     |     |     |     |     |
| 16 |     |     |     |     |     |     |     |     |     |
| 17 |     |     |     |     |     |     |     |     |     |
| 18 |     |     |     |     |     |     |     |     |     |
| 19 |     |     |     |     |     |     |     |     |     |
| 20 |     |     |     |     |     |     |     |     |     |
| 21 |     |     |     |     |     |     |     |     |     |
| 22 |     |     |     |     |     |     |     |     |     |
| 23 |     |     |     |     |     |     |     |     |     |
| 24 |     |     |     |     |     |     |     |     |     |
| 25 |     |     |     |     |     |     |     |     |     |
| 26 |     |     |     |     |     |     |     |     |     |
| 27 |     |     |     |     |     |     |     |     |     |
| 28 |     |     |     |     |     |     |     |     |     |
| 29 |     |     |     |     |     |     |     |     |     |
| 30 |     |     |     |     |     |     |     |     |     |
| 31 |     |     |     |     |     |     |     |     |     |
| 32 |     |     |     |     |     |     |     |     |     |
| 33 |     |     |     |     |     |     |     |     |     |
| 34 |     |     |     |     |     |     |     |     |     |
| 35 |     |     |     |     |     |     |     |     |     |
| 36 |     |     |     |     |     |     |     |     |     |
| 37 |     |     |     |     |     |     |     |     |     |
| 38 |     |     |     |     |     |     |     |     |     |
| 39 |     |     |     |     |     |     |     |     |     |
| 40 |     |     |     |     |     |     |     |     |     |
| 41 |     |     |     |     |     |     |     |     |     |
| 42 |     |     |     |     |     |     |     |     |     |
| 43 |     |     |     |     |     |     |     |     |     |
| 44 |     |     |     |     |     |     |     |     |     |
| 45 |     |     |     |     |     |     |     |     |     |
| 46 |     |     |     |     |     |     |     |     |     |
| 47 |     |     |     |     |     |     |     |     |     |
| 48 |     |     |     |     |     |     |     |     |     |
| 49 |     |     |     |     |     |     |     |     |     |
| 50 |     |     |     |     |     |     |     |     |     |
| 51 |     |     |     |     |     |     |     |     |     |
| 52 |     |     |     |     |     |     |     |     |     |
| 53 |     |     |     |     |     |     |     |     |     |
| 54 |     |     |     |     |     |     |     |     |     |
| 55 |     |     |     |     |     |     |     |     |     |
| 56 |     |     |     |     |     |     |     |     |     |
| 57 |     |     |     |     |     |     |     |     |     |
| 58 |     |     |     |     |     |     |     |     |     |
| 59 |     |     |     |     |     |     |     |     |     |
| 60 |     |     |     |     |     |     |     |     |     |

For peer review only

1  
2  
3  
4  
5  
6  
7  
8  
9  
10  
11  
12  
13  
14  
15  
16  
17  
18  
19  
20  
21  
22  
23  
24  
25  
26  
27  
28  
29  
30  
31  
32  
33  
34  
35  
36  
37  
38  
39  
40  
41  
42  
43  
44  
45  
46  
47  
48  
49  
50  
51  
52  
53  
54  
55  
56  
57  
58  
59  
60

| RNL | RCX | RPA | RWH | RM2 | RR7 | RNS | RN3 | RGN |
|-----|-----|-----|-----|-----|-----|-----|-----|-----|
| 406 | 407 | 409 | 421 | 423 | 428 | 432 | 425 | 432 |
| 318 | 319 | 343 | 332 | 338 | 342 | 347 | 358 | 329 |
| 164 | 179 | 184 | 216 | 242 | 189 | 207 | 202 | 201 |
| 97  | 70  | 76  | 130 | 74  | 102 | 108 | 71  | 95  |
| 193 | 208 | 218 | 232 | 336 | 248 | 212 | 244 | 252 |
| 383 | 374 | 397 | 405 | 402 | 416 | 422 | 409 | 405 |
| 363 | 341 | 374 | 382 | 373 | 382 | 393 | 384 | 366 |
| 399 | 399 | 401 | 418 | 414 | 419 | 429 | 422 | 431 |
| 297 | 305 | 292 | 320 | 249 | 290 | 307 | 297 | 327 |
| 355 | 341 | 351 | 369 | 373 | 396 | 397 | 364 | 381 |
| 188 | 186 | 221 | 251 | 280 | 206 | 233 | 222 | 224 |
| 119 | 84  | 93  | 168 | 87  | 114 | 123 | 82  | 113 |
| 343 | 366 | 379 | 375 | 377 | 383 | 381 | 396 | 393 |
| 382 | 374 | 398 | 402 | 399 | 412 | 418 | 409 | 397 |
| 225 | 231 | 266 | 293 | 330 | 251 | 269 | 288 | 275 |
| 225 | 235 | 265 | 291 | 331 | 249 | 269 | 289 | 276 |
| 388 | 387 | 394 | 403 | 409 | 409 | 416 | 406 | 405 |
| 196 | 184 | 199 | 172 | 114 | 179 | 251 | 245 | 176 |
| 226 | 232 | 265 | 290 | 329 | 250 | 270 | 288 | 277 |
| 353 | 351 | 382 | 374 | 366 | 355 | 389 | 386 | 382 |
| 311 | 245 | 262 | 298 | 296 | 314 | 301 | 297 | 277 |
| 326 | 288 | 292 | 308 | 279 | 320 | 338 | 323 | 323 |
| 194 | 210 | 220 | 230 | 335 | 248 | 212 | 247 | 256 |
| 226 | 233 | 266 | 295 | 331 | 253 | 269 | 289 | 275 |
| 343 | 364 | 376 | 376 | 373 | 383 | 376 | 395 | 395 |
| 322 | 303 | 325 | 325 | 326 | 315 | 342 | 313 | 333 |
| 390 | 385 | 398 | 409 | 407 | 403 | 419 | 409 | 415 |
| 197 | 198 | 230 | 249 | 308 | 231 | 243 | 248 | 236 |
| 216 | 198 | 226 | 199 | 123 | 204 | 271 | 274 | 204 |
| 261 | 254 | 268 | 294 | 273 | 299 | 306 | 302 | 260 |
| 215 | 221 | 247 | 265 | 308 | 233 | 258 | 264 | 264 |
| 395 | 396 | 406 | 413 | 420 | 423 | 427 | 421 | 428 |
| 343 | 357 | 376 | 370 | 375 | 374 | 374 | 391 | 389 |
| 225 | 228 | 265 | 293 | 330 | 250 | 271 | 290 | 274 |
| 288 | 266 | 291 | 302 | 306 | 329 | 336 | 307 | 299 |
| 180 | 182 | 198 | 222 | 185 | 212 | 207 | 211 | 177 |
| 111 | 106 | 110 | 131 | 160 | 129 | 144 | 115 | 105 |
| 214 | 226 | 250 | 286 | 317 | 241 | 257 | 279 | 267 |
| 222 | 230 | 266 | 292 | 329 | 248 | 267 | 289 | 274 |
| 187 | 203 | 213 | 199 | 229 | 214 | 249 | 230 | 179 |
| 402 | 397 | 409 | 416 | 417 | 418 | 425 | 421 | 426 |
| 304 | 281 | 307 | 323 | 322 | 349 | 355 | 320 | 305 |
| 206 | 206 | 221 | 221 | 227 | 223 | 226 | 235 | 189 |
| 380 | 380 | 378 | 386 | 393 | 400 | 422 | 399 | 394 |
| 320 | 309 | 368 | 363 | 337 | 367 | 390 | 384 | 369 |

|    |     |     |     |     |     |     |     |     |     |
|----|-----|-----|-----|-----|-----|-----|-----|-----|-----|
| 1  |     |     |     |     |     |     |     |     |     |
| 2  | 364 | 349 | 365 | 368 | 345 | 379 | 392 | 388 | 363 |
| 3  | 383 | 388 | 393 | 400 | 412 | 412 | 418 | 405 | 407 |
| 4  | 295 | 281 | 317 | 324 | 299 | 316 | 313 | 337 | 314 |
| 5  | 224 | 230 | 261 | 287 | 322 | 246 | 267 | 289 | 273 |
| 6  | 399 | 394 | 403 | 413 | 417 | 418 | 426 | 416 | 421 |
| 7  | 381 | 382 | 398 | 401 | 401 | 407 | 414 | 408 | 412 |
| 8  |     |     |     |     |     |     |     |     |     |
| 9  |     |     |     |     |     |     |     |     |     |
| 10 |     |     |     |     |     |     |     |     |     |
| 11 |     |     |     |     |     |     |     |     |     |
| 12 |     |     |     |     |     |     |     |     |     |
| 13 |     |     |     |     |     |     |     |     |     |
| 14 |     |     |     |     |     |     |     |     |     |
| 15 |     |     |     |     |     |     |     |     |     |
| 16 |     |     |     |     |     |     |     |     |     |
| 17 |     |     |     |     |     |     |     |     |     |
| 18 |     |     |     |     |     |     |     |     |     |
| 19 |     |     |     |     |     |     |     |     |     |
| 20 |     |     |     |     |     |     |     |     |     |
| 21 |     |     |     |     |     |     |     |     |     |
| 22 |     |     |     |     |     |     |     |     |     |
| 23 |     |     |     |     |     |     |     |     |     |
| 24 |     |     |     |     |     |     |     |     |     |
| 25 |     |     |     |     |     |     |     |     |     |
| 26 |     |     |     |     |     |     |     |     |     |
| 27 |     |     |     |     |     |     |     |     |     |
| 28 |     |     |     |     |     |     |     |     |     |
| 29 |     |     |     |     |     |     |     |     |     |
| 30 |     |     |     |     |     |     |     |     |     |
| 31 |     |     |     |     |     |     |     |     |     |
| 32 |     |     |     |     |     |     |     |     |     |
| 33 |     |     |     |     |     |     |     |     |     |
| 34 |     |     |     |     |     |     |     |     |     |
| 35 |     |     |     |     |     |     |     |     |     |
| 36 |     |     |     |     |     |     |     |     |     |
| 37 |     |     |     |     |     |     |     |     |     |
| 38 |     |     |     |     |     |     |     |     |     |
| 39 |     |     |     |     |     |     |     |     |     |
| 40 |     |     |     |     |     |     |     |     |     |
| 41 |     |     |     |     |     |     |     |     |     |
| 42 |     |     |     |     |     |     |     |     |     |
| 43 |     |     |     |     |     |     |     |     |     |
| 44 |     |     |     |     |     |     |     |     |     |
| 45 |     |     |     |     |     |     |     |     |     |
| 46 |     |     |     |     |     |     |     |     |     |
| 47 |     |     |     |     |     |     |     |     |     |
| 48 |     |     |     |     |     |     |     |     |     |
| 49 |     |     |     |     |     |     |     |     |     |
| 50 |     |     |     |     |     |     |     |     |     |
| 51 |     |     |     |     |     |     |     |     |     |
| 52 |     |     |     |     |     |     |     |     |     |
| 53 |     |     |     |     |     |     |     |     |     |
| 54 |     |     |     |     |     |     |     |     |     |
| 55 |     |     |     |     |     |     |     |     |     |
| 56 |     |     |     |     |     |     |     |     |     |
| 57 |     |     |     |     |     |     |     |     |     |
| 58 |     |     |     |     |     |     |     |     |     |
| 59 |     |     |     |     |     |     |     |     |     |
| 60 |     |     |     |     |     |     |     |     |     |

For peer review only

1  
2  
3  
4  
5  
6  
7  
8  
9  
10  
11  
12  
13  
14  
15  
16  
17  
18  
19  
20  
21  
22  
23  
24  
25  
26  
27  
28  
29  
30  
31  
32  
33  
34  
35  
36  
37  
38  
39  
40  
41  
42  
43  
44  
45  
46  
47  
48  
49  
50  
51  
52  
53  
54  
55  
56  
57  
58  
59  
60

|  | RVW | RNZ | RDE | RLN | RWY | RGQ | RXP | RXH | RXK |
|--|-----|-----|-----|-----|-----|-----|-----|-----|-----|
|  | 439 | 442 | 446 | 464 | 465 | 479 | 494 | 499 | 500 |
|  | 375 | 338 | 369 | 391 | 356 | 376 | 401 | 378 | 418 |
|  | 207 | 171 | 202 | 183 | 172 | 190 | 214 | 226 | 215 |
|  | 96  | 67  | 110 | 70  | 76  | 127 | 70  | 108 | 104 |
|  | 234 | 241 | 211 | 210 | 241 | 202 | 244 | 304 | 280 |
|  | 423 | 419 | 436 | 444 | 440 | 454 | 470 | 462 | 485 |
|  | 391 | 380 | 411 | 405 | 419 | 409 | 422 | 425 | 460 |
|  | 431 | 441 | 441 | 453 | 457 | 467 | 488 | 497 | 491 |
|  | 279 | 311 | 332 | 349 | 341 | 353 | 387 | 349 | 324 |
|  | 393 | 379 | 402 | 420 | 395 | 386 | 429 | 430 | 446 |
|  | 235 | 205 | 216 | 215 | 209 | 230 | 227 | 240 | 245 |
|  | 121 | 77  | 139 | 73  | 90  | 150 | 81  | 130 | 124 |
|  | 375 | 383 | 384 | 391 | 404 | 408 | 408 | 413 | 437 |
|  | 419 | 420 | 434 | 443 | 449 | 448 | 475 | 465 | 485 |
|  | 274 | 252 | 257 | 254 | 270 | 266 | 279 | 307 | 298 |
|  | 277 | 251 | 258 | 255 | 270 | 268 | 282 | 305 | 299 |
|  | 412 | 431 | 437 | 441 | 455 | 443 | 462 | 483 | 473 |
|  | 237 | 193 | 210 | 219 | 235 | 237 | 244 | 156 | 242 |
|  | 276 | 251 | 257 | 253 | 272 | 269 | 281 | 307 | 299 |
|  | 385 | 377 | 400 | 411 | 408 | 410 | 436 | 438 | 455 |
|  | 274 | 282 | 293 | 332 | 295 | 304 | 350 | 310 | 322 |
|  | 352 | 306 | 336 | 343 | 347 | 373 | 380 | 345 | 355 |
|  | 234 | 239 | 215 | 212 | 244 | 205 | 243 | 311 | 277 |
|  | 276 | 252 | 258 | 254 | 274 | 271 | 283 | 310 | 300 |
|  | 375 | 383 | 379 | 384 | 401 | 406 | 402 | 410 | 434 |
|  | 331 | 348 | 321 | 352 | 359 | 369 | 375 | 403 | 375 |
|  | 412 | 428 | 426 | 447 | 449 | 458 | 478 | 473 | 475 |
|  | 244 | 218 | 221 | 220 | 227 | 221 | 244 | 257 | 268 |
|  | 261 | 215 | 228 | 231 | 255 | 250 | 274 | 181 | 258 |
|  | 292 | 275 | 309 | 301 | 294 | 270 | 288 | 306 | 339 |
|  | 261 | 224 | 242 | 239 | 244 | 248 | 261 | 289 | 276 |
|  | 431 | 435 | 446 | 457 | 458 | 464 | 482 | 490 | 493 |
|  | 378 | 379 | 374 | 379 | 405 | 409 | 400 | 410 | 427 |
|  | 274 | 250 | 257 | 254 | 272 | 270 | 281 | 306 | 299 |
|  | 331 | 313 | 362 | 345 | 329 | 359 | 384 | 325 | 354 |
|  | 217 | 183 | 191 | 204 | 223 | 202 | 207 | 208 | 244 |
|  | 125 | 115 | 132 | 159 | 138 | 122 | 170 | 134 | 153 |
|  | 266 | 237 | 253 | 241 | 261 | 260 | 279 | 293 | 288 |
|  | 276 | 250 | 253 | 254 | 271 | 268 | 279 | 306 | 298 |
|  | 212 | 215 | 214 | 291 | 243 | 222 | 278 | 204 | 254 |
|  | 432 | 436 | 444 | 455 | 462 | 469 | 486 | 490 | 495 |
|  | 342 | 326 | 383 | 364 | 338 | 380 | 393 | 346 | 363 |
|  | 250 | 194 | 209 | 284 | 233 | 212 | 264 | 241 | 307 |
|  | 425 | 403 | 415 | 439 | 424 | 420 | 462 | 485 | 478 |
|  | 361 | 365 | 379 | 395 | 385 | 386 | 397 | 405 | 399 |

|    |     |     |     |     |     |     |     |     |     |
|----|-----|-----|-----|-----|-----|-----|-----|-----|-----|
| 1  |     |     |     |     |     |     |     |     |     |
| 2  | 404 | 389 | 395 | 397 | 403 | 438 | 428 | 412 | 421 |
| 3  | 409 | 422 | 439 | 443 | 446 | 455 | 467 | 479 | 476 |
| 4  | 314 | 307 | 356 | 335 | 324 | 356 | 331 | 351 | 375 |
| 5  | 275 | 247 | 250 | 254 | 271 | 264 | 280 | 306 | 300 |
| 6  | 432 | 436 | 444 | 455 | 457 | 471 | 480 | 486 | 491 |
| 7  | 405 | 421 | 429 | 438 | 437 | 453 | 460 | 471 | 458 |
| 8  |     |     |     |     |     |     |     |     |     |
| 9  |     |     |     |     |     |     |     |     |     |
| 10 |     |     |     |     |     |     |     |     |     |
| 11 |     |     |     |     |     |     |     |     |     |
| 12 |     |     |     |     |     |     |     |     |     |
| 13 |     |     |     |     |     |     |     |     |     |
| 14 |     |     |     |     |     |     |     |     |     |
| 15 |     |     |     |     |     |     |     |     |     |
| 16 |     |     |     |     |     |     |     |     |     |
| 17 |     |     |     |     |     |     |     |     |     |
| 18 |     |     |     |     |     |     |     |     |     |
| 19 |     |     |     |     |     |     |     |     |     |
| 20 |     |     |     |     |     |     |     |     |     |
| 21 |     |     |     |     |     |     |     |     |     |
| 22 |     |     |     |     |     |     |     |     |     |
| 23 |     |     |     |     |     |     |     |     |     |
| 24 |     |     |     |     |     |     |     |     |     |
| 25 |     |     |     |     |     |     |     |     |     |
| 26 |     |     |     |     |     |     |     |     |     |
| 27 |     |     |     |     |     |     |     |     |     |
| 28 |     |     |     |     |     |     |     |     |     |
| 29 |     |     |     |     |     |     |     |     |     |
| 30 |     |     |     |     |     |     |     |     |     |
| 31 |     |     |     |     |     |     |     |     |     |
| 32 |     |     |     |     |     |     |     |     |     |
| 33 |     |     |     |     |     |     |     |     |     |
| 34 |     |     |     |     |     |     |     |     |     |
| 35 |     |     |     |     |     |     |     |     |     |
| 36 |     |     |     |     |     |     |     |     |     |
| 37 |     |     |     |     |     |     |     |     |     |
| 38 |     |     |     |     |     |     |     |     |     |
| 39 |     |     |     |     |     |     |     |     |     |
| 40 |     |     |     |     |     |     |     |     |     |
| 41 |     |     |     |     |     |     |     |     |     |
| 42 |     |     |     |     |     |     |     |     |     |
| 43 |     |     |     |     |     |     |     |     |     |
| 44 |     |     |     |     |     |     |     |     |     |
| 45 |     |     |     |     |     |     |     |     |     |
| 46 |     |     |     |     |     |     |     |     |     |
| 47 |     |     |     |     |     |     |     |     |     |
| 48 |     |     |     |     |     |     |     |     |     |
| 49 |     |     |     |     |     |     |     |     |     |
| 50 |     |     |     |     |     |     |     |     |     |
| 51 |     |     |     |     |     |     |     |     |     |
| 52 |     |     |     |     |     |     |     |     |     |
| 53 |     |     |     |     |     |     |     |     |     |
| 54 |     |     |     |     |     |     |     |     |     |
| 55 |     |     |     |     |     |     |     |     |     |
| 56 |     |     |     |     |     |     |     |     |     |
| 57 |     |     |     |     |     |     |     |     |     |
| 58 |     |     |     |     |     |     |     |     |     |
| 59 |     |     |     |     |     |     |     |     |     |
| 60 |     |     |     |     |     |     |     |     |     |

For peer review only

1  
2  
3  
4  
5  
6  
7  
8  
9  
10  
11  
12  
13  
14  
15  
16  
17  
18  
19  
20  
21  
22  
23  
24  
25  
26  
27  
28  
29  
30  
31  
32  
33  
34  
35  
36  
37  
38  
39  
40  
41  
42  
43  
44  
45  
46  
47  
48  
49  
50  
51  
52  
53  
54  
55  
56  
57  
58  
59  
60

| RD1 | RJL | RXF | RQ8 | RXQ | RTF | RD3 | RW6 | RNA |
|-----|-----|-----|-----|-----|-----|-----|-----|-----|
| 496 | 507 | 511 | 517 | 519 | 530 | 538 | 543 | 547 |
| 400 | 403 | 440 | 422 | 414 | 439 | 432 | 437 | 440 |
| 200 | 241 | 233 | 232 | 203 | 191 | 234 | 220 | 245 |
| 118 | 83  | 82  | 74  | 54  | 96  | 153 | 100 | 67  |
| 263 | 256 | 264 | 309 | 284 | 219 | 274 | 237 | 301 |
| 473 | 492 | 482 | 483 | 491 | 515 | 513 | 507 | 512 |
| 443 | 455 | 462 | 448 | 459 | 484 | 484 | 478 | 478 |
| 494 | 502 | 499 | 511 | 512 | 522 | 528 | 528 | 536 |
| 362 | 394 | 379 | 383 | 389 | 396 | 397 | 426 | 395 |
| 435 | 444 | 452 | 445 | 436 | 464 | 454 | 468 | 477 |
| 242 | 259 | 276 | 263 | 243 | 213 | 290 | 246 | 271 |
| 141 | 95  | 88  | 84  | 59  | 119 | 185 | 125 | 81  |
| 395 | 452 | 424 | 446 | 451 | 430 | 473 | 458 | 476 |
| 478 | 490 | 486 | 500 | 497 | 515 | 515 | 505 | 515 |
| 295 | 312 | 320 | 305 | 308 | 258 | 337 | 299 | 326 |
| 297 | 312 | 321 | 307 | 306 | 258 | 338 | 301 | 329 |
| 480 | 489 | 491 | 500 | 504 | 516 | 523 | 517 | 524 |
| 205 | 289 | 284 | 244 | 263 | 321 | 266 | 166 | 285 |
| 299 | 311 | 316 | 305 | 307 | 260 | 340 | 301 | 328 |
| 457 | 432 | 457 | 450 | 443 | 446 | 461 | 486 | 480 |
| 353 | 321 | 351 | 332 | 343 | 395 | 371 | 373 | 349 |
| 336 | 398 | 396 | 401 | 381 | 426 | 392 | 389 | 418 |
| 265 | 257 | 272 | 311 | 290 | 220 | 275 | 238 | 306 |
| 297 | 311 | 321 | 307 | 309 | 260 | 337 | 298 | 329 |
| 396 | 453 | 425 | 448 | 451 | 420 | 475 | 455 | 475 |
| 375 | 388 | 393 | 416 | 410 | 413 | 411 | 408 | 418 |
| 483 | 478 | 494 | 496 | 497 | 526 | 515 | 518 | 525 |
| 260 | 273 | 272 | 257 | 254 | 232 | 288 | 260 | 262 |
| 228 | 315 | 316 | 261 | 293 | 352 | 290 | 181 | 315 |
| 291 | 340 | 337 | 329 | 305 | 353 | 349 | 336 | 344 |
| 272 | 294 | 291 | 293 | 292 | 235 | 326 | 279 | 310 |
| 487 | 502 | 504 | 510 | 507 | 524 | 525 | 537 | 540 |
| 392 | 450 | 425 | 446 | 449 | 421 | 471 | 443 | 470 |
| 296 | 311 | 318 | 305 | 307 | 257 | 339 | 301 | 329 |
| 342 | 391 | 341 | 394 | 363 | 400 | 438 | 354 | 359 |
| 217 | 214 | 240 | 229 | 216 | 235 | 231 | 246 | 253 |
| 131 | 132 | 181 | 134 | 141 | 165 | 182 | 206 | 145 |
| 290 | 292 | 304 | 301 | 299 | 246 | 338 | 282 | 318 |
| 293 | 311 | 316 | 305 | 307 | 258 | 337 | 299 | 329 |
| 223 | 256 | 296 | 226 | 208 | 334 | 342 | 335 | 240 |
| 497 | 495 | 506 | 512 | 518 | 530 | 534 | 535 | 542 |
| 368 | 399 | 359 | 414 | 388 | 424 | 463 | 370 | 381 |
| 237 | 304 | 292 | 262 | 219 | 309 | 264 | 298 | 318 |
| 464 | 468 | 482 | 484 | 461 | 489 | 492 | 497 | 506 |
| 453 | 371 | 405 | 434 | 428 | 473 | 423 | 425 | 420 |

|    |     |     |     |     |     |     |     |     |     |
|----|-----|-----|-----|-----|-----|-----|-----|-----|-----|
| 1  |     |     |     |     |     |     |     |     |     |
| 2  | 433 | 459 | 448 | 456 | 462 | 481 | 479 | 452 | 497 |
| 3  | 476 | 493 | 472 | 498 | 496 | 515 | 526 | 507 | 517 |
| 4  | 357 | 374 | 381 | 369 | 388 | 385 | 404 | 381 | 431 |
| 5  | 294 | 308 | 317 | 304 | 302 | 254 | 335 | 300 | 323 |
| 6  | 494 | 499 | 507 | 508 | 514 | 530 | 529 | 527 | 538 |
| 7  | 474 | 485 | 479 | 490 | 504 | 508 | 495 | 519 | 517 |
| 8  |     |     |     |     |     |     |     |     |     |
| 9  |     |     |     |     |     |     |     |     |     |
| 10 |     |     |     |     |     |     |     |     |     |
| 11 |     |     |     |     |     |     |     |     |     |
| 12 |     |     |     |     |     |     |     |     |     |
| 13 |     |     |     |     |     |     |     |     |     |
| 14 |     |     |     |     |     |     |     |     |     |
| 15 |     |     |     |     |     |     |     |     |     |
| 16 |     |     |     |     |     |     |     |     |     |
| 17 |     |     |     |     |     |     |     |     |     |
| 18 |     |     |     |     |     |     |     |     |     |
| 19 |     |     |     |     |     |     |     |     |     |
| 20 |     |     |     |     |     |     |     |     |     |
| 21 |     |     |     |     |     |     |     |     |     |
| 22 |     |     |     |     |     |     |     |     |     |
| 23 |     |     |     |     |     |     |     |     |     |
| 24 |     |     |     |     |     |     |     |     |     |
| 25 |     |     |     |     |     |     |     |     |     |
| 26 |     |     |     |     |     |     |     |     |     |
| 27 |     |     |     |     |     |     |     |     |     |
| 28 |     |     |     |     |     |     |     |     |     |
| 29 |     |     |     |     |     |     |     |     |     |
| 30 |     |     |     |     |     |     |     |     |     |
| 31 |     |     |     |     |     |     |     |     |     |
| 32 |     |     |     |     |     |     |     |     |     |
| 33 |     |     |     |     |     |     |     |     |     |
| 34 |     |     |     |     |     |     |     |     |     |
| 35 |     |     |     |     |     |     |     |     |     |
| 36 |     |     |     |     |     |     |     |     |     |
| 37 |     |     |     |     |     |     |     |     |     |
| 38 |     |     |     |     |     |     |     |     |     |
| 39 |     |     |     |     |     |     |     |     |     |
| 40 |     |     |     |     |     |     |     |     |     |
| 41 |     |     |     |     |     |     |     |     |     |
| 42 |     |     |     |     |     |     |     |     |     |
| 43 |     |     |     |     |     |     |     |     |     |
| 44 |     |     |     |     |     |     |     |     |     |
| 45 |     |     |     |     |     |     |     |     |     |
| 46 |     |     |     |     |     |     |     |     |     |
| 47 |     |     |     |     |     |     |     |     |     |
| 48 |     |     |     |     |     |     |     |     |     |
| 49 |     |     |     |     |     |     |     |     |     |
| 50 |     |     |     |     |     |     |     |     |     |
| 51 |     |     |     |     |     |     |     |     |     |
| 52 |     |     |     |     |     |     |     |     |     |
| 53 |     |     |     |     |     |     |     |     |     |
| 54 |     |     |     |     |     |     |     |     |     |
| 55 |     |     |     |     |     |     |     |     |     |
| 56 |     |     |     |     |     |     |     |     |     |
| 57 |     |     |     |     |     |     |     |     |     |
| 58 |     |     |     |     |     |     |     |     |     |
| 59 |     |     |     |     |     |     |     |     |     |
| 60 |     |     |     |     |     |     |     |     |     |

For peer review only

1  
2  
3  
4  
5  
6  
7  
8  
9  
10  
11  
12  
13  
14  
15  
16  
17  
18  
19  
20  
21  
22  
23  
24  
25  
26  
27  
28  
29  
30  
31  
32  
33  
34  
35  
36  
37  
38  
39  
40  
41  
42  
43  
44  
45  
46  
47  
48  
49  
50  
51  
52  
53  
54  
55  
56  
57  
58  
59  
60

|    | RA9 | RA2 | RTX | RXC | RXL | RBA | RAJ | RRK | RHU |
|----|-----|-----|-----|-----|-----|-----|-----|-----|-----|
| 10 | 562 | 591 | 595 | 601 | 616 | 628 | 636 | 644 | 661 |
| 11 | 440 | 444 | 458 | 442 | 508 | 474 | 493 | 512 | 533 |
| 12 | 227 | 301 | 218 | 240 | 285 | 255 | 291 | 373 | 307 |
| 13 | 175 | 131 | 79  | 69  | 83  | 139 | 178 | 119 | 240 |
| 14 | 324 | 399 | 273 | 294 | 318 | 332 | 299 | 398 | 402 |
| 15 | 532 | 560 | 571 | 578 | 594 | 595 | 620 | 613 | 631 |
| 16 | 497 | 536 | 524 | 521 | 552 | 555 | 584 | 577 | 590 |
| 17 | 563 | 581 | 581 | 589 | 609 | 620 | 623 | 644 | 649 |
| 18 | 411 | 451 | 434 | 476 | 456 | 451 | 449 | 475 | 482 |
| 19 | 484 | 537 | 521 | 518 | 540 | 543 | 567 | 564 | 580 |
| 20 | 263 | 363 | 248 | 276 | 317 | 298 | 333 | 423 | 371 |
| 21 | 211 | 170 | 85  | 78  | 107 | 169 | 226 | 150 | 266 |
| 22 | 521 | 501 | 520 | 508 | 511 | 539 | 536 | 559 | 593 |
| 23 | 539 | 562 | 563 | 579 | 589 | 602 | 613 | 616 | 625 |
| 24 | 321 | 454 | 314 | 334 | 370 | 359 | 401 | 504 | 452 |
| 25 | 323 | 454 | 315 | 333 | 372 | 361 | 402 | 507 | 451 |
| 26 | 553 | 569 | 570 | 583 | 598 | 602 | 615 | 617 | 640 |
| 27 | 210 | 189 | 293 | 290 | 301 | 304 | 323 | 215 | 336 |
| 28 | 321 | 454 | 314 | 334 | 371 | 361 | 402 | 504 | 452 |
| 29 | 496 | 518 | 493 | 534 | 542 | 558 | 556 | 566 | 593 |
| 30 | 347 | 408 | 406 | 406 | 402 | 420 | 405 | 439 | 439 |
| 31 | 426 | 402 | 465 | 439 | 471 | 449 | 479 | 455 | 466 |
| 32 | 328 | 400 | 271 | 294 | 321 | 328 | 299 | 404 | 401 |
| 33 | 323 | 454 | 315 | 333 | 372 | 363 | 402 | 506 | 452 |
| 34 | 511 | 496 | 523 | 502 | 513 | 529 | 534 | 555 | 591 |
| 35 | 432 | 450 | 462 | 473 | 476 | 478 | 472 | 529 | 517 |
| 36 | 554 | 568 | 577 | 584 | 580 | 607 | 605 | 629 | 616 |
| 37 | 285 | 394 | 250 | 289 | 337 | 308 | 334 | 451 | 399 |
| 38 | 234 | 222 | 324 | 327 | 331 | 337 | 355 | 243 | 366 |
| 39 | 367 | 355 | 352 | 368 | 400 | 385 | 431 | 403 | 450 |
| 40 | 305 | 425 | 289 | 305 | 348 | 327 | 377 | 490 | 422 |
| 41 | 557 | 579 | 587 | 597 | 608 | 617 | 631 | 642 | 650 |
| 42 | 513 | 498 | 525 | 500 | 500 | 528 | 531 | 553 | 588 |
| 43 | 318 | 452 | 315 | 332 | 373 | 359 | 402 | 506 | 450 |
| 44 | 415 | 454 | 427 | 465 | 487 | 464 | 468 | 452 | 461 |
| 45 | 226 | 255 | 229 | 241 | 263 | 284 | 298 | 301 | 323 |
| 46 | 137 | 151 | 147 | 151 | 184 | 140 | 186 | 210 | 200 |
| 47 | 314 | 439 | 296 | 321 | 362 | 353 | 387 | 495 | 446 |
| 48 | 318 | 452 | 313 | 332 | 370 | 358 | 399 | 504 | 447 |
| 49 | 215 | 268 | 306 | 279 | 354 | 243 | 337 | 321 | 293 |
| 50 | 564 | 578 | 591 | 599 | 612 | 619 | 626 | 649 | 652 |
| 51 | 422 | 465 | 443 | 500 | 514 | 477 | 490 | 472 | 507 |
| 52 | 291 | 233 | 321 | 288 | 322 | 283 | 323 | 356 | 335 |
| 53 | 534 | 547 | 561 | 552 | 570 | 588 | 592 | 604 | 615 |
| 54 | 427 | 527 | 491 | 511 | 459 | 581 | 526 | 538 | 498 |



|    |     |     |     |     |     |     |     |     |     |
|----|-----|-----|-----|-----|-----|-----|-----|-----|-----|
| 1  |     |     |     |     |     |     |     |     |     |
| 2  | 507 | 487 | 539 | 539 | 534 | 551 | 553 | 557 | 575 |
| 3  | 546 | 567 | 559 | 587 | 602 | 597 | 613 | 614 | 637 |
| 4  | 456 | 404 | 436 | 395 | 454 | 438 | 520 | 426 | 519 |
| 5  | 312 | 452 | 312 | 332 | 366 | 359 | 399 | 504 | 448 |
| 6  | 561 | 574 | 588 | 596 | 612 | 614 | 624 | 640 | 643 |
| 7  | 543 | 553 | 579 | 575 | 595 | 589 | 602 | 623 | 625 |
| 8  |     |     |     |     |     |     |     |     |     |
| 9  |     |     |     |     |     |     |     |     |     |
| 10 |     |     |     |     |     |     |     |     |     |
| 11 |     |     |     |     |     |     |     |     |     |
| 12 |     |     |     |     |     |     |     |     |     |
| 13 |     |     |     |     |     |     |     |     |     |
| 14 |     |     |     |     |     |     |     |     |     |
| 15 |     |     |     |     |     |     |     |     |     |
| 16 |     |     |     |     |     |     |     |     |     |
| 17 |     |     |     |     |     |     |     |     |     |
| 18 |     |     |     |     |     |     |     |     |     |
| 19 |     |     |     |     |     |     |     |     |     |
| 20 |     |     |     |     |     |     |     |     |     |
| 21 |     |     |     |     |     |     |     |     |     |
| 22 |     |     |     |     |     |     |     |     |     |
| 23 |     |     |     |     |     |     |     |     |     |
| 24 |     |     |     |     |     |     |     |     |     |
| 25 |     |     |     |     |     |     |     |     |     |
| 26 |     |     |     |     |     |     |     |     |     |
| 27 |     |     |     |     |     |     |     |     |     |
| 28 |     |     |     |     |     |     |     |     |     |
| 29 |     |     |     |     |     |     |     |     |     |
| 30 |     |     |     |     |     |     |     |     |     |
| 31 |     |     |     |     |     |     |     |     |     |
| 32 |     |     |     |     |     |     |     |     |     |
| 33 |     |     |     |     |     |     |     |     |     |
| 34 |     |     |     |     |     |     |     |     |     |
| 35 |     |     |     |     |     |     |     |     |     |
| 36 |     |     |     |     |     |     |     |     |     |
| 37 |     |     |     |     |     |     |     |     |     |
| 38 |     |     |     |     |     |     |     |     |     |
| 39 |     |     |     |     |     |     |     |     |     |
| 40 |     |     |     |     |     |     |     |     |     |
| 41 |     |     |     |     |     |     |     |     |     |
| 42 |     |     |     |     |     |     |     |     |     |
| 43 |     |     |     |     |     |     |     |     |     |
| 44 |     |     |     |     |     |     |     |     |     |
| 45 |     |     |     |     |     |     |     |     |     |
| 46 |     |     |     |     |     |     |     |     |     |
| 47 |     |     |     |     |     |     |     |     |     |
| 48 |     |     |     |     |     |     |     |     |     |
| 49 |     |     |     |     |     |     |     |     |     |
| 50 |     |     |     |     |     |     |     |     |     |
| 51 |     |     |     |     |     |     |     |     |     |
| 52 |     |     |     |     |     |     |     |     |     |
| 53 |     |     |     |     |     |     |     |     |     |
| 54 |     |     |     |     |     |     |     |     |     |
| 55 |     |     |     |     |     |     |     |     |     |
| 56 |     |     |     |     |     |     |     |     |     |
| 57 |     |     |     |     |     |     |     |     |     |
| 58 |     |     |     |     |     |     |     |     |     |
| 59 |     |     |     |     |     |     |     |     |     |
| 60 |     |     |     |     |     |     |     |     |     |

For peer review only

1  
2  
3  
4  
5  
6  
7  
8  
9  
10  
11  
12  
13  
14  
15  
16  
17  
18  
19  
20  
21  
22  
23  
24  
25  
26  
27  
28  
29  
30  
31  
32  
33  
34  
35  
36  
37  
38  
39  
40  
41  
42  
43  
44  
45  
46  
47  
48  
49  
50  
51  
52  
53  
54  
55  
56  
57  
58  
59  
60

| RXR | RJ7 | RR1 | RYR | RXN | RYJ | RX1 | RWD | RL4 |
|-----|-----|-----|-----|-----|-----|-----|-----|-----|
| 668 | 661 | 689 | 702 | 712 | 713 | 729 | 733 | 735 |
| 558 | 520 | 552 | 526 | 571 | 559 | 587 | 591 | 592 |
| 278 | 332 | 348 | 263 | 302 | 397 | 404 | 304 | 336 |
| 101 | 115 | 109 | 91  | 310 | 196 | 240 | 237 | 165 |
| 300 | 378 | 447 | 334 | 414 | 428 | 473 | 346 | 375 |
| 642 | 640 | 665 | 654 | 680 | 696 | 689 | 711 | 705 |
| 601 | 595 | 614 | 611 | 653 | 670 | 666 | 657 | 658 |
| 660 | 657 | 683 | 693 | 711 | 706 | 715 | 729 | 723 |
| 497 | 452 | 508 | 492 | 545 | 510 | 537 | 529 | 544 |
| 582 | 598 | 601 | 599 | 641 | 632 | 646 | 644 | 656 |
| 295 | 367 | 402 | 307 | 343 | 407 | 449 | 347 | 389 |
| 126 | 132 | 130 | 116 | 372 | 228 | 294 | 269 | 199 |
| 585 | 563 | 642 | 595 | 632 | 611 | 666 | 632 | 633 |
| 637 | 635 | 652 | 657 | 685 | 688 | 701 | 696 | 707 |
| 351 | 435 | 482 | 365 | 406 | 495 | 549 | 413 | 448 |
| 348 | 438 | 484 | 363 | 407 | 493 | 548 | 414 | 451 |
| 640 | 643 | 669 | 676 | 692 | 691 | 712 | 700 | 705 |
| 317 | 324 | 347 | 367 | 240 | 382 | 338 | 368 | 373 |
| 351 | 438 | 482 | 364 | 407 | 497 | 550 | 414 | 454 |
| 567 | 588 | 618 | 633 | 632 | 624 | 662 | 655 | 654 |
| 489 | 455 | 462 | 445 | 486 | 506 | 517 | 540 | 489 |
| 517 | 481 | 506 | 523 | 530 | 574 | 526 | 549 | 550 |
| 307 | 375 | 448 | 334 | 419 | 428 | 477 | 348 | 374 |
| 351 | 443 | 484 | 365 | 411 | 497 | 549 | 413 | 454 |
| 582 | 563 | 638 | 603 | 634 | 610 | 669 | 624 | 635 |
| 505 | 501 | 514 | 534 | 571 | 551 | 551 | 555 | 560 |
| 644 | 642 | 659 | 674 | 691 | 686 | 708 | 693 | 695 |
| 311 | 387 | 414 | 310 | 366 | 465 | 481 | 331 | 395 |
| 346 | 347 | 389 | 393 | 282 | 414 | 372 | 407 | 430 |
| 421 | 434 | 440 | 439 | 464 | 515 | 511 | 493 | 478 |
| 328 | 403 | 459 | 345 | 372 | 463 | 511 | 386 | 423 |
| 659 | 651 | 678 | 693 | 714 | 709 | 722 | 725 | 724 |
| 578 | 557 | 631 | 600 | 627 | 608 | 654 | 628 | 629 |
| 350 | 435 | 482 | 363 | 408 | 496 | 546 | 407 | 451 |
| 500 | 501 | 492 | 501 | 532 | 582 | 559 | 495 | 516 |
| 311 | 346 | 296 | 285 | 292 | 409 | 370 | 322 | 348 |
| 266 | 202 | 219 | 163 | 243 | 268 | 213 | 205 | 207 |
| 335 | 416 | 454 | 350 | 386 | 473 | 519 | 404 | 439 |
| 349 | 439 | 480 | 362 | 403 | 494 | 544 | 412 | 448 |
| 473 | 300 | 362 | 282 | 396 | 387 | 334 | 345 | 342 |
| 655 | 661 | 680 | 693 | 707 | 710 | 718 | 719 | 723 |
| 534 | 527 | 506 | 525 | 553 | 614 | 569 | 518 | 541 |
| 365 | 349 | 378 | 298 | 354 | 415 | 394 | 394 | 417 |
| 642 | 619 | 667 | 632 | 691 | 654 | 681 | 701 | 695 |
| 509 | 592 | 592 | 578 | 574 | 625 | 610 | 585 | 553 |

|    |     |     |     |     |     |     |     |     |     |
|----|-----|-----|-----|-----|-----|-----|-----|-----|-----|
| 1  |     |     |     |     |     |     |     |     |     |
| 2  | 579 | 578 | 578 | 622 | 631 | 633 | 622 | 633 | 650 |
| 3  | 644 | 645 | 653 | 672 | 687 | 697 | 706 | 682 | 686 |
| 4  | 475 | 478 | 524 | 530 | 507 | 551 | 586 | 555 | 571 |
| 5  | 350 | 434 | 480 | 363 | 401 | 494 | 543 | 414 | 446 |
| 6  | 653 | 652 | 672 | 688 | 698 | 710 | 716 | 709 | 715 |
| 7  | 625 | 629 | 658 | 672 | 692 | 675 | 679 | 693 | 700 |
| 8  |     |     |     |     |     |     |     |     |     |
| 9  |     |     |     |     |     |     |     |     |     |
| 10 |     |     |     |     |     |     |     |     |     |
| 11 |     |     |     |     |     |     |     |     |     |
| 12 |     |     |     |     |     |     |     |     |     |
| 13 |     |     |     |     |     |     |     |     |     |
| 14 |     |     |     |     |     |     |     |     |     |
| 15 |     |     |     |     |     |     |     |     |     |
| 16 |     |     |     |     |     |     |     |     |     |
| 17 |     |     |     |     |     |     |     |     |     |
| 18 |     |     |     |     |     |     |     |     |     |
| 19 |     |     |     |     |     |     |     |     |     |
| 20 |     |     |     |     |     |     |     |     |     |
| 21 |     |     |     |     |     |     |     |     |     |
| 22 |     |     |     |     |     |     |     |     |     |
| 23 |     |     |     |     |     |     |     |     |     |
| 24 |     |     |     |     |     |     |     |     |     |
| 25 |     |     |     |     |     |     |     |     |     |
| 26 |     |     |     |     |     |     |     |     |     |
| 27 |     |     |     |     |     |     |     |     |     |
| 28 |     |     |     |     |     |     |     |     |     |
| 29 |     |     |     |     |     |     |     |     |     |
| 30 |     |     |     |     |     |     |     |     |     |
| 31 |     |     |     |     |     |     |     |     |     |
| 32 |     |     |     |     |     |     |     |     |     |
| 33 |     |     |     |     |     |     |     |     |     |
| 34 |     |     |     |     |     |     |     |     |     |
| 35 |     |     |     |     |     |     |     |     |     |
| 36 |     |     |     |     |     |     |     |     |     |
| 37 |     |     |     |     |     |     |     |     |     |
| 38 |     |     |     |     |     |     |     |     |     |
| 39 |     |     |     |     |     |     |     |     |     |
| 40 |     |     |     |     |     |     |     |     |     |
| 41 |     |     |     |     |     |     |     |     |     |
| 42 |     |     |     |     |     |     |     |     |     |
| 43 |     |     |     |     |     |     |     |     |     |
| 44 |     |     |     |     |     |     |     |     |     |
| 45 |     |     |     |     |     |     |     |     |     |
| 46 |     |     |     |     |     |     |     |     |     |
| 47 |     |     |     |     |     |     |     |     |     |
| 48 |     |     |     |     |     |     |     |     |     |
| 49 |     |     |     |     |     |     |     |     |     |
| 50 |     |     |     |     |     |     |     |     |     |
| 51 |     |     |     |     |     |     |     |     |     |
| 52 |     |     |     |     |     |     |     |     |     |
| 53 |     |     |     |     |     |     |     |     |     |
| 54 |     |     |     |     |     |     |     |     |     |
| 55 |     |     |     |     |     |     |     |     |     |
| 56 |     |     |     |     |     |     |     |     |     |
| 57 |     |     |     |     |     |     |     |     |     |
| 58 |     |     |     |     |     |     |     |     |     |
| 59 |     |     |     |     |     |     |     |     |     |
| 60 |     |     |     |     |     |     |     |     |     |

For peer review only

1  
2  
3  
4  
5  
6  
7  
8  
9  
10  
11  
12  
13  
14  
15  
16  
17  
18  
19  
20  
21  
22  
23  
24  
25  
26  
27  
28  
29  
30  
31  
32  
33  
34  
35  
36  
37  
38  
39  
40  
41  
42  
43  
44  
45  
46  
47  
48  
49  
50  
51  
52  
53  
54  
55  
56  
57  
58  
59  
60

| RN5 | RDU | RBV | RA7 | REF | RAL | RKB | RTR | RJZ |
|-----|-----|-----|-----|-----|-----|-----|-----|-----|
| 733 | 738 | 751 | 759 | 763 | 765 | 796 | 807 | 809 |
| 621 | 577 | 621 | 628 | 591 | 602 | 649 | 659 | 625 |
| 334 | 288 | 423 | 343 | 305 | 348 | 397 | 400 | 394 |
| 138 | 100 | 198 | 232 | 188 | 163 | 184 | 208 | 145 |
| 410 | 391 | 405 | 410 | 380 | 422 | 419 | 458 | 387 |
| 713 | 697 | 733 | 723 | 716 | 723 | 757 | 780 | 771 |
| 665 | 648 | 698 | 676 | 662 | 684 | 715 | 736 | 741 |
| 733 | 728 | 742 | 749 | 757 | 752 | 776 | 797 | 800 |
| 548 | 537 | 578 | 573 | 572 | 524 | 598 | 656 | 573 |
| 645 | 628 | 661 | 670 | 676 | 655 | 703 | 710 | 711 |
| 396 | 348 | 448 | 403 | 340 | 387 | 429 | 453 | 423 |
| 159 | 119 | 231 | 284 | 224 | 187 | 210 | 244 | 165 |
| 636 | 652 | 632 | 640 | 656 | 677 | 676 | 697 | 663 |
| 710 | 707 | 736 | 725 | 709 | 728 | 759 | 782 | 764 |
| 454 | 432 | 547 | 467 | 419 | 472 | 508 | 536 | 495 |
| 455 | 433 | 547 | 467 | 422 | 469 | 502 | 535 | 497 |
| 722 | 708 | 733 | 735 | 729 | 733 | 765 | 787 | 782 |
| 350 | 289 | 359 | 429 | 309 | 280 | 370 | 423 | 341 |
| 458 | 432 | 549 | 468 | 422 | 470 | 503 | 534 | 491 |
| 644 | 654 | 666 | 631 | 666 | 673 | 699 | 684 | 734 |
| 479 | 495 | 536 | 522 | 542 | 520 | 526 | 595 | 509 |
| 543 | 540 | 579 | 559 | 534 | 557 | 608 | 633 | 595 |
| 410 | 393 | 403 | 413 | 379 | 427 | 429 | 457 | 382 |
| 456 | 433 | 547 | 467 | 423 | 473 | 508 | 536 | 492 |
| 638 | 652 | 631 | 638 | 656 | 675 | 673 | 696 | 667 |
| 578 | 586 | 598 | 588 | 579 | 578 | 615 | 606 | 625 |
| 714 | 713 | 732 | 734 | 729 | 747 | 755 | 772 | 781 |
| 387 | 385 | 474 | 416 | 369 | 419 | 450 | 467 | 430 |
| 393 | 321 | 397 | 472 | 339 | 310 | 414 | 464 | 376 |
| 477 | 454 | 512 | 514 | 477 | 498 | 532 | 531 | 554 |
| 431 | 411 | 514 | 425 | 401 | 439 | 481 | 496 | 462 |
| 720 | 731 | 753 | 747 | 757 | 762 | 782 | 797 | 801 |
| 634 | 641 | 625 | 635 | 650 | 656 | 672 | 673 | 663 |
| 455 | 430 | 546 | 469 | 420 | 472 | 507 | 534 | 486 |
| 546 | 557 | 519 | 595 | 551 | 556 | 624 | 579 | 605 |
| 327 | 341 | 376 | 365 | 363 | 376 | 390 | 357 | 413 |
| 154 | 200 | 269 | 227 | 211 | 238 | 243 | 264 | 233 |
| 447 | 422 | 532 | 439 | 403 | 439 | 477 | 514 | 475 |
| 457 | 430 | 545 | 468 | 420 | 470 | 504 | 529 | 493 |
| 280 | 367 | 480 | 334 | 383 | 379 | 395 | 426 | 412 |
| 727 | 732 | 746 | 751 | 752 | 758 | 785 | 804 | 800 |
| 578 | 585 | 553 | 624 | 588 | 592 | 638 | 601 | 633 |
| 328 | 352 | 421 | 399 | 352 | 380 | 436 | 406 | 413 |
| 673 | 672 | 704 | 696 | 720 | 719 | 731 | 760 | 756 |
| 578 | 667 | 615 | 628 | 620 | 677 | 611 | 660 | 706 |

|    |     |     |     |     |     |     |     |     |     |
|----|-----|-----|-----|-----|-----|-----|-----|-----|-----|
| 1  |     |     |     |     |     |     |     |     |     |
| 2  | 630 | 647 | 678 | 666 | 638 | 652 | 704 | 725 | 702 |
| 3  | 709 | 712 | 714 | 728 | 728 | 738 | 769 | 758 | 778 |
| 4  | 521 | 516 | 543 | 607 | 542 | 558 | 629 | 594 | 603 |
| 5  | 452 | 428 | 540 | 465 | 421 | 469 | 505 | 527 | 488 |
| 6  | 723 | 729 | 752 | 744 | 742 | 752 | 776 | 796 | 794 |
| 7  | 708 | 705 | 728 | 708 | 717 | 718 | 748 | 768 | 765 |
| 8  |     |     |     |     |     |     |     |     |     |
| 9  |     |     |     |     |     |     |     |     |     |
| 10 |     |     |     |     |     |     |     |     |     |
| 11 |     |     |     |     |     |     |     |     |     |
| 12 |     |     |     |     |     |     |     |     |     |
| 13 |     |     |     |     |     |     |     |     |     |
| 14 |     |     |     |     |     |     |     |     |     |
| 15 |     |     |     |     |     |     |     |     |     |
| 16 |     |     |     |     |     |     |     |     |     |
| 17 |     |     |     |     |     |     |     |     |     |
| 18 |     |     |     |     |     |     |     |     |     |
| 19 |     |     |     |     |     |     |     |     |     |
| 20 |     |     |     |     |     |     |     |     |     |
| 21 |     |     |     |     |     |     |     |     |     |
| 22 |     |     |     |     |     |     |     |     |     |
| 23 |     |     |     |     |     |     |     |     |     |
| 24 |     |     |     |     |     |     |     |     |     |
| 25 |     |     |     |     |     |     |     |     |     |
| 26 |     |     |     |     |     |     |     |     |     |
| 27 |     |     |     |     |     |     |     |     |     |
| 28 |     |     |     |     |     |     |     |     |     |
| 29 |     |     |     |     |     |     |     |     |     |
| 30 |     |     |     |     |     |     |     |     |     |
| 31 |     |     |     |     |     |     |     |     |     |
| 32 |     |     |     |     |     |     |     |     |     |
| 33 |     |     |     |     |     |     |     |     |     |
| 34 |     |     |     |     |     |     |     |     |     |
| 35 |     |     |     |     |     |     |     |     |     |
| 36 |     |     |     |     |     |     |     |     |     |
| 37 |     |     |     |     |     |     |     |     |     |
| 38 |     |     |     |     |     |     |     |     |     |
| 39 |     |     |     |     |     |     |     |     |     |
| 40 |     |     |     |     |     |     |     |     |     |
| 41 |     |     |     |     |     |     |     |     |     |
| 42 |     |     |     |     |     |     |     |     |     |
| 43 |     |     |     |     |     |     |     |     |     |
| 44 |     |     |     |     |     |     |     |     |     |
| 45 |     |     |     |     |     |     |     |     |     |
| 46 |     |     |     |     |     |     |     |     |     |
| 47 |     |     |     |     |     |     |     |     |     |
| 48 |     |     |     |     |     |     |     |     |     |
| 49 |     |     |     |     |     |     |     |     |     |
| 50 |     |     |     |     |     |     |     |     |     |
| 51 |     |     |     |     |     |     |     |     |     |
| 52 |     |     |     |     |     |     |     |     |     |
| 53 |     |     |     |     |     |     |     |     |     |
| 54 |     |     |     |     |     |     |     |     |     |
| 55 |     |     |     |     |     |     |     |     |     |
| 56 |     |     |     |     |     |     |     |     |     |
| 57 |     |     |     |     |     |     |     |     |     |
| 58 |     |     |     |     |     |     |     |     |     |
| 59 |     |     |     |     |     |     |     |     |     |
| 60 |     |     |     |     |     |     |     |     |     |

For peer review only

1  
2  
3  
4  
5  
6  
7  
8  
9  
10  
11  
12  
13  
14  
15  
16  
17  
18  
19  
20  
21  
22  
23  
24  
25  
26  
27  
28  
29  
30  
31  
32  
33  
34  
35  
36  
37  
38  
39  
40  
41  
42  
43  
44  
45  
46  
47  
48  
49  
50  
51  
52  
53  
54  
55  
56  
57  
58  
59  
60

|    | RHM | RTG | R1H | RK9 | RXW | RR8 | RWP | RWF | RJE |
|----|-----|-----|-----|-----|-----|-----|-----|-----|-----|
| 10 | 839 | 852 | 887 | 916 | 928 | 956 | 962 | 962 | 971 |
| 11 | 694 | 692 | 708 | 743 | 765 | 778 | 777 | 734 | 849 |
| 12 | 462 | 433 | 427 | 412 | 401 | 543 | 385 | 346 | 458 |
| 13 | 206 | 224 | 251 | 220 | 225 | 293 | 209 | 277 | 251 |
| 14 | 506 | 482 | 454 | 516 | 458 | 644 | 454 | 430 | 532 |
| 15 | 796 | 815 | 869 | 869 | 906 | 906 | 921 | 937 | 934 |
| 16 | 727 | 763 | 819 | 798 | 848 | 855 | 867 | 876 | 893 |
| 17 | 827 | 842 | 880 | 904 | 922 | 936 | 955 | 946 | 963 |
| 18 | 631 | 623 | 617 | 684 | 671 | 712 | 743 | 717 | 679 |
| 19 | 742 | 754 | 791 | 795 | 827 | 852 | 822 | 839 | 853 |
| 20 | 552 | 470 | 470 | 467 | 439 | 616 | 456 | 401 | 530 |
| 21 | 248 | 258 | 285 | 253 | 267 | 349 | 253 | 332 | 282 |
| 22 | 725 | 722 | 772 | 797 | 816 | 834 | 809 | 832 | 851 |
| 23 | 802 | 808 | 860 | 862 | 891 | 924 | 913 | 922 | 936 |
| 24 | 636 | 563 | 531 | 570 | 528 | 736 | 549 | 486 | 613 |
| 25 | 637 | 564 | 534 | 574 | 528 | 740 | 550 | 485 | 611 |
| 26 | 802 | 827 | 855 | 875 | 896 | 928 | 925 | 935 | 943 |
| 27 | 353 | 416 | 534 | 440 | 525 | 380 | 496 | 488 | 533 |
| 28 | 637 | 561 | 534 | 574 | 528 | 739 | 551 | 487 | 615 |
| 29 | 710 | 753 | 786 | 780 | 794 | 831 | 827 | 860 | 845 |
| 30 | 549 | 586 | 614 | 647 | 692 | 647 | 727 | 690 | 695 |
| 31 | 590 | 647 | 716 | 657 | 731 | 709 | 698 | 724 | 749 |
| 32 | 503 | 486 | 457 | 512 | 453 | 648 | 457 | 436 | 522 |
| 33 | 638 | 561 | 533 | 575 | 530 | 741 | 551 | 488 | 614 |
| 34 | 725 | 728 | 778 | 799 | 807 | 831 | 806 | 831 | 847 |
| 35 | 640 | 675 | 679 | 711 | 710 | 737 | 748 | 760 | 779 |
| 36 | 790 | 821 | 858 | 885 | 894 | 925 | 938 | 937 | 935 |
| 37 | 575 | 489 | 479 | 506 | 469 | 660 | 479 | 413 | 529 |
| 38 | 390 | 471 | 569 | 489 | 574 | 434 | 546 | 530 | 587 |
| 39 | 555 | 570 | 651 | 591 | 630 | 635 | 597 | 628 | 658 |
| 40 | 590 | 542 | 486 | 541 | 506 | 695 | 518 | 471 | 560 |
| 41 | 822 | 833 | 877 | 900 | 915 | 945 | 958 | 950 | 957 |
| 42 | 720 | 722 | 765 | 794 | 801 | 825 | 804 | 827 | 844 |
| 43 | 633 | 562 | 527 | 573 | 529 | 737 | 550 | 487 | 609 |
| 44 | 606 | 603 | 677 | 646 | 674 | 739 | 619 | 677 | 751 |
| 45 | 383 | 395 | 543 | 387 | 446 | 439 | 447 | 433 | 468 |
| 46 | 276 | 273 | 333 | 220 | 277 | 345 | 300 | 226 | 322 |
| 47 | 619 | 549 | 510 | 549 | 500 | 721 | 527 | 475 | 586 |
| 48 | 635 | 561 | 527 | 567 | 527 | 735 | 546 | 488 | 611 |
| 49 | 426 | 465 | 502 | 375 | 453 | 514 | 552 | 414 | 612 |
| 50 | 826 | 845 | 876 | 903 | 926 | 950 | 962 | 956 | 966 |
| 51 | 647 | 624 | 717 | 693 | 718 | 786 | 660 | 710 | 773 |
| 52 | 395 | 425 | 572 | 428 | 490 | 483 | 441 | 460 | 541 |
| 53 | 774 | 792 | 836 | 860 | 873 | 895 | 909 | 875 | 894 |
| 54 | 640 | 685 | 780 | 722 | 767 | 781 | 801 | 882 | 754 |

|    |     |     |     |     |     |     |     |     |     |
|----|-----|-----|-----|-----|-----|-----|-----|-----|-----|
| 1  |     |     |     |     |     |     |     |     |     |
| 2  | 714 | 773 | 793 | 800 | 841 | 839 | 851 | 883 | 863 |
| 3  | 805 | 827 | 841 | 868 | 877 | 925 | 920 | 926 | 949 |
| 4  | 602 | 641 | 683 | 738 | 706 | 739 | 675 | 708 | 720 |
| 5  | 632 | 562 | 518 | 566 | 526 | 733 | 549 | 484 | 606 |
| 6  | 821 | 843 | 869 | 903 | 905 | 939 | 958 | 948 | 960 |
| 7  | 796 | 806 | 837 | 860 | 894 | 900 | 931 | 922 | 915 |
| 8  |     |     |     |     |     |     |     |     |     |
| 9  |     |     |     |     |     |     |     |     |     |
| 10 |     |     |     |     |     |     |     |     |     |
| 11 |     |     |     |     |     |     |     |     |     |
| 12 |     |     |     |     |     |     |     |     |     |
| 13 |     |     |     |     |     |     |     |     |     |
| 14 |     |     |     |     |     |     |     |     |     |
| 15 |     |     |     |     |     |     |     |     |     |
| 16 |     |     |     |     |     |     |     |     |     |
| 17 |     |     |     |     |     |     |     |     |     |
| 18 |     |     |     |     |     |     |     |     |     |
| 19 |     |     |     |     |     |     |     |     |     |
| 20 |     |     |     |     |     |     |     |     |     |
| 21 |     |     |     |     |     |     |     |     |     |
| 22 |     |     |     |     |     |     |     |     |     |
| 23 |     |     |     |     |     |     |     |     |     |
| 24 |     |     |     |     |     |     |     |     |     |
| 25 |     |     |     |     |     |     |     |     |     |
| 26 |     |     |     |     |     |     |     |     |     |
| 27 |     |     |     |     |     |     |     |     |     |
| 28 |     |     |     |     |     |     |     |     |     |
| 29 |     |     |     |     |     |     |     |     |     |
| 30 |     |     |     |     |     |     |     |     |     |
| 31 |     |     |     |     |     |     |     |     |     |
| 32 |     |     |     |     |     |     |     |     |     |
| 33 |     |     |     |     |     |     |     |     |     |
| 34 |     |     |     |     |     |     |     |     |     |
| 35 |     |     |     |     |     |     |     |     |     |
| 36 |     |     |     |     |     |     |     |     |     |
| 37 |     |     |     |     |     |     |     |     |     |
| 38 |     |     |     |     |     |     |     |     |     |
| 39 |     |     |     |     |     |     |     |     |     |
| 40 |     |     |     |     |     |     |     |     |     |
| 41 |     |     |     |     |     |     |     |     |     |
| 42 |     |     |     |     |     |     |     |     |     |
| 43 |     |     |     |     |     |     |     |     |     |
| 44 |     |     |     |     |     |     |     |     |     |
| 45 |     |     |     |     |     |     |     |     |     |
| 46 |     |     |     |     |     |     |     |     |     |
| 47 |     |     |     |     |     |     |     |     |     |
| 48 |     |     |     |     |     |     |     |     |     |
| 49 |     |     |     |     |     |     |     |     |     |
| 50 |     |     |     |     |     |     |     |     |     |
| 51 |     |     |     |     |     |     |     |     |     |
| 52 |     |     |     |     |     |     |     |     |     |
| 53 |     |     |     |     |     |     |     |     |     |
| 54 |     |     |     |     |     |     |     |     |     |
| 55 |     |     |     |     |     |     |     |     |     |
| 56 |     |     |     |     |     |     |     |     |     |
| 57 |     |     |     |     |     |     |     |     |     |
| 58 |     |     |     |     |     |     |     |     |     |
| 59 |     |     |     |     |     |     |     |     |     |
| 60 |     |     |     |     |     |     |     |     |     |

For peer review only

1  
2  
3  
4  
5  
6  
7  
8  
9  
10  
11  
12  
13  
14  
15  
16  
17  
18  
19  
20  
21  
22  
23  
24  
25  
26  
27  
28  
29  
30  
31  
32  
33  
34  
35  
36  
37  
38  
39  
40  
41  
42  
43  
44  
45  
46  
47  
48  
49  
50  
51  
52  
53  
54  
55  
56  
57  
58  
59  
60

| RGT | RWA  | RJ1  | RRV  | RH8  | RVV  | RM1  | RTD  | RTE  |
|-----|------|------|------|------|------|------|------|------|
| 977 | 1004 | 1034 | 1033 | 1047 | 1053 | 1207 | 1315 | 1320 |
| 795 | 845  | 855  | 805  | 821  | 821  | 955  | 1047 | 1057 |
| 494 | 561  | 468  | 506  | 444  | 412  | 494  | 678  | 515  |
| 254 | 261  | 255  | 200  | 244  | 212  | 298  | 301  | 345  |
| 574 | 584  | 551  | 511  | 583  | 594  | 643  | 804  | 685  |
| 944 | 975  | 1010 | 1013 | 995  | 1001 | 1149 | 1257 | 1269 |
| 893 | 912  | 955  | 965  | 914  | 908  | 1079 | 1183 | 1173 |
| 955 | 997  | 1026 | 1015 | 1029 | 1041 | 1190 | 1297 | 1319 |
| 747 | 745  | 782  | 773  | 817  | 754  | 902  | 956  | 1002 |
| 845 | 892  | 927  | 915  | 919  | 901  | 1019 | 1162 | 1141 |
| 584 | 629  | 529  | 565  | 542  | 483  | 573  | 744  | 616  |
| 312 | 320  | 301  | 234  | 306  | 273  | 354  | 356  | 406  |
| 873 | 888  | 895  | 865  | 878  | 926  | 1063 | 1142 | 1153 |
| 946 | 978  | 1006 | 998  | 1012 | 1003 | 1146 | 1246 | 1261 |
| 678 | 750  | 631  | 659  | 648  | 600  | 707  | 903  | 753  |
| 676 | 751  | 633  | 658  | 645  | 607  | 708  | 901  | 752  |
| 956 | 990  | 1011 | 1007 | 1029 | 996  | 1155 | 1274 | 1283 |
| 486 | 509  | 517  | 526  | 448  | 477  | 576  | 523  | 685  |
| 682 | 750  | 632  | 661  | 648  | 604  | 708  | 907  | 754  |
| 853 | 848  | 913  | 900  | 890  | 922  | 1043 | 1122 | 1100 |
| 676 | 631  | 774  | 704  | 788  | 705  | 857  | 929  | 937  |
| 722 | 758  | 760  | 781  | 754  | 760  | 860  | 963  | 931  |
| 576 | 588  | 550  | 515  | 579  | 596  | 645  | 817  | 689  |
| 680 | 751  | 633  | 663  | 652  | 603  | 711  | 905  | 751  |
| 871 | 884  | 884  | 860  | 874  | 928  | 1060 | 1135 | 1137 |
| 741 | 776  | 788  | 798  | 808  | 798  | 932  | 992  | 1026 |
| 948 | 974  | 1002 | 1003 | 1016 | 994  | 1164 | 1256 | 1279 |
| 595 | 655  | 586  | 594  | 573  | 516  | 616  | 806  | 649  |
| 541 | 561  | 553  | 558  | 498  | 566  | 636  | 578  | 772  |
| 622 | 688  | 749  | 759  | 668  | 637  | 748  | 836  | 871  |
| 645 | 700  | 596  | 610  | 599  | 573  | 662  | 849  | 687  |
| 963 | 1002 | 1029 | 1026 | 1032 | 1043 | 1197 | 1304 | 1313 |
| 863 | 885  | 883  | 858  | 867  | 928  | 1047 | 1129 | 1141 |
| 676 | 751  | 623  | 662  | 646  | 603  | 710  | 901  | 750  |
| 767 | 680  | 785  | 861  | 778  | 659  | 913  | 916  | 865  |
| 455 | 481  | 552  | 590  | 438  | 399  | 480  | 538  | 584  |
| 277 | 281  | 409  | 357  | 288  | 299  | 331  | 492  | 358  |
| 657 | 736  | 610  | 640  | 626  | 584  | 689  | 871  | 725  |
| 678 | 749  | 633  | 657  | 643  | 597  | 704  | 903  | 753  |
| 451 | 468  | 593  | 542  | 510  | 574  | 574  | 781  | 665  |
| 966 | 999  | 1040 | 1036 | 1046 | 1042 | 1201 | 1292 | 1315 |
| 794 | 701  | 817  | 902  | 816  | 716  | 959  | 955  | 896  |
| 436 | 596  | 609  | 612  | 495  | 483  | 627  | 690  | 606  |
| 887 | 941  | 963  | 953  | 955  | 983  | 1133 | 1222 | 1212 |
| 880 | 748  | 930  | 940  | 901  | 893  | 958  | 1149 | 1011 |



|    |     |     |      |      |      |      |      |      |      |
|----|-----|-----|------|------|------|------|------|------|------|
| 1  |     |     |      |      |      |      |      |      |      |
| 2  | 900 | 915 | 902  | 922  | 913  | 918  | 1067 | 1156 | 1149 |
| 3  | 949 | 971 | 1002 | 1013 | 1013 | 987  | 1160 | 1257 | 1242 |
| 4  | 724 | 783 | 817  | 801  | 853  | 724  | 961  | 939  | 1031 |
| 5  | 668 | 742 | 632  | 654  | 643  | 594  | 699  | 896  | 750  |
| 6  | 964 | 997 | 1028 | 1022 | 1030 | 1025 | 1195 | 1288 | 1300 |
| 7  | 935 | 965 | 986  | 968  | 1001 | 1010 | 1150 | 1233 | 1272 |
| 8  |     |     |      |      |      |      |      |      |      |
| 9  |     |     |      |      |      |      |      |      |      |
| 10 |     |     |      |      |      |      |      |      |      |
| 11 |     |     |      |      |      |      |      |      |      |
| 12 |     |     |      |      |      |      |      |      |      |
| 13 |     |     |      |      |      |      |      |      |      |
| 14 |     |     |      |      |      |      |      |      |      |
| 15 |     |     |      |      |      |      |      |      |      |
| 16 |     |     |      |      |      |      |      |      |      |
| 17 |     |     |      |      |      |      |      |      |      |
| 18 |     |     |      |      |      |      |      |      |      |
| 19 |     |     |      |      |      |      |      |      |      |
| 20 |     |     |      |      |      |      |      |      |      |
| 21 |     |     |      |      |      |      |      |      |      |
| 22 |     |     |      |      |      |      |      |      |      |
| 23 |     |     |      |      |      |      |      |      |      |
| 24 |     |     |      |      |      |      |      |      |      |
| 25 |     |     |      |      |      |      |      |      |      |
| 26 |     |     |      |      |      |      |      |      |      |
| 27 |     |     |      |      |      |      |      |      |      |
| 28 |     |     |      |      |      |      |      |      |      |
| 29 |     |     |      |      |      |      |      |      |      |
| 30 |     |     |      |      |      |      |      |      |      |
| 31 |     |     |      |      |      |      |      |      |      |
| 32 |     |     |      |      |      |      |      |      |      |
| 33 |     |     |      |      |      |      |      |      |      |
| 34 |     |     |      |      |      |      |      |      |      |
| 35 |     |     |      |      |      |      |      |      |      |
| 36 |     |     |      |      |      |      |      |      |      |
| 37 |     |     |      |      |      |      |      |      |      |
| 38 |     |     |      |      |      |      |      |      |      |
| 39 |     |     |      |      |      |      |      |      |      |
| 40 |     |     |      |      |      |      |      |      |      |
| 41 |     |     |      |      |      |      |      |      |      |
| 42 |     |     |      |      |      |      |      |      |      |
| 43 |     |     |      |      |      |      |      |      |      |
| 44 |     |     |      |      |      |      |      |      |      |
| 45 |     |     |      |      |      |      |      |      |      |
| 46 |     |     |      |      |      |      |      |      |      |
| 47 |     |     |      |      |      |      |      |      |      |
| 48 |     |     |      |      |      |      |      |      |      |
| 49 |     |     |      |      |      |      |      |      |      |
| 50 |     |     |      |      |      |      |      |      |      |
| 51 |     |     |      |      |      |      |      |      |      |
| 52 |     |     |      |      |      |      |      |      |      |
| 53 |     |     |      |      |      |      |      |      |      |
| 54 |     |     |      |      |      |      |      |      |      |
| 55 |     |     |      |      |      |      |      |      |      |
| 56 |     |     |      |      |      |      |      |      |      |
| 57 |     |     |      |      |      |      |      |      |      |
| 58 |     |     |      |      |      |      |      |      |      |
| 59 |     |     |      |      |      |      |      |      |      |
| 60 |     |     |      |      |      |      |      |      |      |

For peer review only

1  
2  
3  
4  
5  
6  
7  
8  
9  
10  
11  
12  
13  
14  
15  
16  
17  
18  
19  
20  
21  
22  
23  
24  
25  
26  
27  
28  
29  
30  
31  
32  
33  
34  
35  
36  
37  
38  
39  
40  
41  
42  
43  
44  
45  
46  
47  
48  
49  
50  
51  
52  
53  
54  
55  
56  
57  
58  
59  
60

| <b>RWE</b> | <b>RTH</b> | <b>RHQ</b> | <b>RPY</b> |
|------------|------------|------------|------------|
| 1421       | 1428       | 1494       | 1920       |
| 1146       | 1117       | 1258       | 1471       |
| 725        | 617        | 685        | 670        |
| 391        | 424        | 375        | 537        |
| 751        | 817        | 767        | 709        |
| 1358       | 1380       | 1436       | 1893       |
| 1290       | 1283       | 1356       | 1803       |
| 1396       | 1400       | 1471       | 1894       |
| 1047       | 1085       | 1102       | 1485       |
| 1257       | 1272       | 1336       | 1750       |
| 803        | 725        | 779        | 719        |
| 450        | 519        | 441        | 620        |
| 1212       | 1241       | 1222       | 1664       |
| 1356       | 1370       | 1438       | 1870       |
| 952        | 893        | 912        | 892        |
| 948        | 892        | 912        | 894        |
| 1366       | 1382       | 1446       | 1898       |
| 714        | 564        | 706        | 1036       |
| 950        | 893        | 917        | 890        |
| 1269       | 1230       | 1285       | 1639       |
| 1062       | 1033       | 1033       | 1347       |
| 1059       | 1025       | 1125       | 1528       |
| 759        | 815        | 764        | 712        |
| 951        | 897        | 911        | 893        |
| 1210       | 1241       | 1216       | 1665       |
| 1098       | 1126       | 1154       | 1494       |
| 1358       | 1375       | 1442       | 1877       |
| 835        | 779        | 826        | 772        |
| 782        | 624        | 779        | 1119       |
| 944        | 920        | 1058       | 1358       |
| 903        | 831        | 855        | 821        |
| 1399       | 1413       | 1481       | 1911       |
| 1210       | 1238       | 1199       | 1654       |
| 953        | 889        | 909        | 886        |
| 965        | 990        | 1096       | 1561       |
| 680        | 624        | 739        | 1110       |
| 462        | 392        | 543        | 562        |
| 921        | 860        | 889        | 861        |
| 947        | 892        | 904        | 889        |
| 750        | 638        | 879        | 960        |
| 1396       | 1420       | 1478       | 1938       |
| 997        | 1041       | 1123       | 1642       |
| 792        | 629        | 894        | 1031       |
| 1312       | 1295       | 1385       | 1786       |
| 1309       | 1274       | 1180       | 1743       |

|    |      |      |      |      |
|----|------|------|------|------|
| 1  |      |      |      |      |
| 2  | 1259 | 1251 | 1317 | 1788 |
| 3  | 1350 | 1357 | 1422 | 1897 |
| 4  | 1015 | 1091 | 1213 | 1426 |
| 5  | 946  | 888  | 908  | 881  |
| 6  | 1385 | 1412 | 1471 | 1926 |
| 7  | 1338 | 1366 | 1421 | 1857 |
| 8  |      |      |      |      |
| 9  |      |      |      |      |
| 10 |      |      |      |      |
| 11 |      |      |      |      |
| 12 |      |      |      |      |
| 13 |      |      |      |      |
| 14 |      |      |      |      |
| 15 |      |      |      |      |
| 16 |      |      |      |      |
| 17 |      |      |      |      |
| 18 |      |      |      |      |
| 19 |      |      |      |      |
| 20 |      |      |      |      |
| 21 |      |      |      |      |
| 22 |      |      |      |      |
| 23 |      |      |      |      |
| 24 |      |      |      |      |
| 25 |      |      |      |      |
| 26 |      |      |      |      |
| 27 |      |      |      |      |
| 28 |      |      |      |      |
| 29 |      |      |      |      |
| 30 |      |      |      |      |
| 31 |      |      |      |      |
| 32 |      |      |      |      |
| 33 |      |      |      |      |
| 34 |      |      |      |      |
| 35 |      |      |      |      |
| 36 |      |      |      |      |
| 37 |      |      |      |      |
| 38 |      |      |      |      |
| 39 |      |      |      |      |
| 40 |      |      |      |      |
| 41 |      |      |      |      |
| 42 |      |      |      |      |
| 43 |      |      |      |      |
| 44 |      |      |      |      |
| 45 |      |      |      |      |
| 46 |      |      |      |      |
| 47 |      |      |      |      |
| 48 |      |      |      |      |
| 49 |      |      |      |      |
| 50 |      |      |      |      |
| 51 |      |      |      |      |
| 52 |      |      |      |      |
| 53 |      |      |      |      |
| 54 |      |      |      |      |
| 55 |      |      |      |      |
| 56 |      |      |      |      |
| 57 |      |      |      |      |
| 58 |      |      |      |      |
| 59 |      |      |      |      |
| 60 |      |      |      |      |

For peer review only

**Table 2.** Porportions of patients reporting a positive experience by question and for each of the 146 h values correspond to the cells in Figure 2.

**Note**

Entries with NA come from hospitals which received less than 21 respondes for the corresponding question.

| Questions | Hospitals |      |      |      |      |      |      |
|-----------|-----------|------|------|------|------|------|------|
|           | RQX       | RRJ  | RT3  | RMP  | RPC  | REP  | RAN  |
| Q10       | 0.71      | 0.70 | 0.81 | 0.82 | 0.74 | 0.75 | 0.73 |
| Q49       | 0.50      | 0.41 | 0.64 | 0.65 | 0.67 | 0.60 | 0.57 |
| Q35       | NA        | 0.57 | 0.62 | 0.62 | 0.42 | 0.62 | 0.59 |
| Q45       | NA        | NA   | NA   | 0.77 | NA   | NA   | NA   |
| Q26       | 0.78      | 0.74 | 0.80 | 0.81 | 0.81 | 0.83 | 0.77 |
| Q13       | 0.66      | 0.63 | 0.66 | 0.74 | 0.69 | 0.72 | 0.65 |
| Q15       | 0.48      | 0.59 | 0.66 | 0.62 | 0.57 | 0.52 | 0.41 |
| Q9        | 0.80      | 0.81 | 0.87 | 0.93 | 0.85 | 0.80 | 0.79 |
| Q1        | 0.78      | 0.62 | 0.65 | 0.73 | 0.87 | 0.80 | 0.64 |
| Q12       | 0.72      | 0.83 | 0.80 | 0.89 | 0.80 | 0.91 | 0.86 |
| Q30       | NA        | 0.52 | 0.71 | 0.76 | 0.85 | 0.80 | 0.68 |
| Q44       | NA        | NA   | NA   | 0.86 | NA   | NA   | NA   |
| Q7        | 0.74      | 0.73 | 0.83 | 0.79 | 0.75 | 0.85 | 0.70 |
| Q14       | 0.52      | 0.48 | 0.64 | 0.76 | 0.63 | 0.71 | 0.62 |
| Q34       | 0.90      | 0.96 | 0.90 | 0.93 | 0.88 | 0.97 | 0.94 |
| Q37       | NA        | 0.93 | 0.90 | 0.91 | 0.90 | 0.91 | 0.86 |
| Q16       | 0.72      | 0.73 | 0.76 | 0.84 | 0.77 | 0.77 | 0.74 |
| Q48       | NA        | NA   | NA   | NA   | NA   | NA   | NA   |
| Q31       | 0.71      | 0.71 | 0.81 | 0.81 | 0.76 | 0.80 | 0.70 |
| Q11       | 0.62      | 0.68 | 0.59 | 0.75 | 0.72 | 0.66 | 0.66 |
| Q53       | 0.76      | 0.41 | 0.60 | 0.67 | 0.72 | 0.58 | 0.51 |
| Q41       | 0.70      | NA   | 0.71 | 0.78 | 0.60 | 0.79 | 0.71 |
| Q25       | 0.83      | 0.93 | 0.94 | 0.98 | 0.95 | 0.98 | 0.90 |
| Q29       | NA        | 0.89 | 0.90 | 0.91 | 0.90 | 0.94 | 0.87 |
| Q6        | 0.89      | 0.85 | 0.91 | 0.85 | 0.93 | 0.87 | 0.67 |
| Q55       | 0.17      | 0.36 | 0.37 | 0.49 | 0.26 | 0.35 | 0.28 |
| Q54       | 0.62      | 0.47 | 0.63 | 0.69 | 0.67 | 0.61 | 0.45 |
| Q36       | 0.81      | 0.77 | 0.91 | 0.94 | 0.89 | 0.90 | 0.83 |
| Q47       | NA        | NA   | NA   | 0.86 | NA   | NA   | NA   |
| Q21       | 0.58      | 0.74 | 0.85 | 0.85 | 0.84 | 0.91 | 0.77 |
| Q38       | NA        | 0.85 | 0.85 | 0.90 | 0.90 | 0.95 | 0.84 |
| Q2        | 0.87      | 0.66 | 0.86 | 0.89 | 0.84 | 0.81 | 0.49 |
| Q5        | 1.00      | 0.96 | 0.96 | 0.97 | 0.91 | 0.96 | 0.92 |
| Q28       | NA        | 0.86 | 0.76 | 0.87 | 0.76 | 0.89 | 0.76 |
| Q19       | NA        | NA   | 0.94 | 0.93 | 0.84 | 0.88 | 0.80 |
| Q23       | NA        | NA   | NA   | 0.87 | 0.78 | 0.83 | 0.66 |
| Q51       | NA        | NA   | NA   | 0.63 | NA   | 0.24 | 0.47 |
| Q39       | NA        | 0.82 | 0.95 | 0.96 | 0.91 | 0.97 | 0.91 |
| Q32       | NA        | 0.82 | 0.77 | 0.65 | 0.78 | 0.79 | 0.76 |
| Q50       | NA        | 0.57 | 0.33 | 0.69 | 0.55 | 0.39 | 0.57 |
| Q56       | 0.83      | 0.88 | 0.96 | 0.92 | 0.90 | 0.93 | 0.82 |
| Q18       | NA        | 0.95 | 0.87 | 0.92 | 0.85 | 0.93 | 0.76 |

|    |            |      |      |      |      |      |      |      |
|----|------------|------|------|------|------|------|------|------|
| 1  |            |      |      |      |      |      |      |      |
| 2  | <b>Q22</b> | NA   | NA   | 0.50 | 0.81 | 0.46 | 0.77 | 0.67 |
| 3  | <b>Q8</b>  | 0.77 | 0.77 | 0.79 | 0.81 | 0.74 | 0.72 | 0.74 |
| 4  | <b>Q52</b> | 0.84 | 0.92 | 0.87 | 1.00 | 0.95 | 0.95 | 0.91 |
| 5  | <b>Q42</b> | 0.91 | 1.00 | 0.97 | 0.97 | 0.92 | 1.00 | 0.95 |
| 6  | <b>Q17</b> | 0.72 | 0.89 | 0.94 | 0.97 | 0.82 | 0.96 | 0.87 |
| 7  | <b>Q20</b> | NA   | 0.83 | 0.85 | 0.90 | 0.78 | 0.95 | 0.80 |
| 8  | <b>Q33</b> | 0.38 | 0.71 | 0.67 | 0.65 | 0.67 | 0.79 | 0.55 |
| 9  | <b>Q57</b> | 0.59 | 0.56 | 0.85 | 0.55 | 0.82 | 0.66 | 0.56 |
| 10 | <b>Q58</b> | 0.31 | 0.23 | 0.22 | 0.27 | 0.14 | 0.29 | 0.59 |
| 11 |            |      |      |      |      |      |      |      |
| 12 |            |      |      |      |      |      |      |      |
| 13 |            |      |      |      |      |      |      |      |
| 14 |            |      |      |      |      |      |      |      |
| 15 |            |      |      |      |      |      |      |      |
| 16 |            |      |      |      |      |      |      |      |
| 17 |            |      |      |      |      |      |      |      |
| 18 |            |      |      |      |      |      |      |      |
| 19 |            |      |      |      |      |      |      |      |
| 20 |            |      |      |      |      |      |      |      |
| 21 |            |      |      |      |      |      |      |      |
| 22 |            |      |      |      |      |      |      |      |
| 23 |            |      |      |      |      |      |      |      |
| 24 |            |      |      |      |      |      |      |      |
| 25 |            |      |      |      |      |      |      |      |
| 26 |            |      |      |      |      |      |      |      |
| 27 |            |      |      |      |      |      |      |      |
| 28 |            |      |      |      |      |      |      |      |
| 29 |            |      |      |      |      |      |      |      |
| 30 |            |      |      |      |      |      |      |      |
| 31 |            |      |      |      |      |      |      |      |
| 32 |            |      |      |      |      |      |      |      |
| 33 |            |      |      |      |      |      |      |      |
| 34 |            |      |      |      |      |      |      |      |
| 35 |            |      |      |      |      |      |      |      |
| 36 |            |      |      |      |      |      |      |      |
| 37 |            |      |      |      |      |      |      |      |
| 38 |            |      |      |      |      |      |      |      |
| 39 |            |      |      |      |      |      |      |      |
| 40 |            |      |      |      |      |      |      |      |
| 41 |            |      |      |      |      |      |      |      |
| 42 |            |      |      |      |      |      |      |      |
| 43 |            |      |      |      |      |      |      |      |
| 44 |            |      |      |      |      |      |      |      |
| 45 |            |      |      |      |      |      |      |      |
| 46 |            |      |      |      |      |      |      |      |
| 47 |            |      |      |      |      |      |      |      |
| 48 |            |      |      |      |      |      |      |      |
| 49 |            |      |      |      |      |      |      |      |
| 50 |            |      |      |      |      |      |      |      |
| 51 |            |      |      |      |      |      |      |      |
| 52 |            |      |      |      |      |      |      |      |
| 53 |            |      |      |      |      |      |      |      |
| 54 |            |      |      |      |      |      |      |      |
| 55 |            |      |      |      |      |      |      |      |
| 56 |            |      |      |      |      |      |      |      |
| 57 |            |      |      |      |      |      |      |      |
| 58 |            |      |      |      |      |      |      |      |
| 59 |            |      |      |      |      |      |      |      |
| 60 |            |      |      |      |      |      |      |      |

For peer review only

hospitals included in the analysis (CPES 2016). These

|    | <b>RGM</b> | <b>RBQ</b> | <b>R1F</b> | <b>RKE</b> | <b>RE9</b> | <b>RJ6</b> | <b>RVY</b> | <b>RA4</b> | <b>RJN</b> |
|----|------------|------------|------------|------------|------------|------------|------------|------------|------------|
| 14 | 0.85       | 0.83       | 0.76       | 0.68       | 0.71       | 0.67       | 0.72       | 0.79       | 0.77       |
| 15 | 0.71       | 0.62       | 0.55       | 0.63       | 0.65       | 0.67       | 0.50       | 0.60       | 0.63       |
| 16 | 0.58       | 0.56       | 0.53       | 0.60       | 0.66       | 0.60       | 0.43       | 0.62       | 0.56       |
| 17 | NA         | 0.64       |
| 18 | 0.81       | 0.81       | 0.78       | 0.79       | 0.67       | 0.82       | 0.79       | 0.76       | 0.79       |
| 19 | 0.79       | 0.79       | 0.67       | 0.69       | 0.75       | 0.78       | 0.73       | 0.74       | 0.68       |
| 20 | 0.60       | 0.65       | 0.59       | 0.56       | 0.62       | 0.59       | 0.60       | 0.50       | 0.58       |
| 21 | 0.96       | 0.82       | 0.86       | 0.86       | 0.90       | 0.87       | 0.79       | 0.86       | 0.89       |
| 22 | 0.80       | 0.66       | 0.74       | 0.76       | 0.78       | 0.72       | 0.79       | 0.85       | 0.78       |
| 23 | 0.94       | 0.86       | 0.76       | 0.83       | 0.82       | 0.86       | 0.81       | 0.82       | 0.83       |
| 24 | 0.85       | 0.76       | 0.75       | 0.82       | 0.72       | 0.69       | 0.64       | 0.80       | 0.74       |
| 25 | NA         | NA         | NA         | 0.82       | NA         | 0.91       | NA         | 0.91       | 0.89       |
| 26 | 0.89       | 0.74       | 0.80       | 0.78       | 0.75       | 0.78       | 0.85       | 0.75       | 0.88       |
| 27 | 0.69       | 0.69       | 0.62       | 0.73       | 0.76       | 0.71       | 0.60       | 0.76       | 0.68       |
| 28 | 0.92       | 0.84       | 0.75       | 0.91       | 0.88       | 0.87       | 0.78       | 0.85       | 0.83       |
| 29 | 0.94       | 0.89       | 0.85       | 0.93       | 0.91       | 0.87       | 0.85       | 0.91       | 0.88       |
| 30 | 0.93       | 0.81       | 0.72       | 0.75       | 0.79       | 0.75       | 0.81       | 0.85       | 0.85       |
| 31 | NA         | 0.48       | 0.61       | 0.73       | 0.73       | 0.77       | 0.73       | 0.75       | 0.71       |
| 32 | 0.75       | 0.84       | 0.76       | 0.79       | 0.74       | 0.72       | 0.71       | 0.73       | 0.82       |
| 33 | 0.80       | 0.62       | 0.66       | 0.69       | 0.75       | 0.74       | 0.79       | 0.74       | 0.81       |
| 34 | 0.63       | 0.53       | 0.59       | 0.69       | 0.61       | 0.61       | 0.55       | 0.65       | 0.63       |
| 35 | 0.71       | 0.67       | 0.72       | 0.73       | 0.78       | 0.74       | 0.76       | 0.79       | 0.72       |
| 36 | 1.00       | 1.00       | 0.96       | 0.98       | 0.89       | 0.93       | 0.94       | 0.97       | 0.92       |
| 37 | 0.94       | 0.84       | 0.88       | 0.84       | 0.80       | 0.84       | 0.88       | 0.81       | 0.91       |
| 38 | 0.92       | 0.88       | 0.86       | 0.89       | 0.95       | 0.89       | 0.89       | 0.88       | 0.94       |
| 39 | 0.42       | 0.38       | 0.37       | 0.43       | 0.37       | 0.42       | 0.27       | 0.31       | 0.35       |
| 40 | 0.76       | 0.56       | 0.55       | 0.68       | 0.72       | 0.65       | 0.62       | 0.71       | 0.69       |
| 41 | 0.96       | 0.87       | 0.88       | 0.92       | 0.82       | 0.83       | 0.80       | 0.84       | 0.88       |
| 42 | NA         | NA         | 0.84       | 0.86       | 0.95       | 0.88       | 0.77       | 0.91       | 0.87       |
| 43 | 0.91       | 0.70       | 0.72       | 0.86       | 0.88       | 0.86       | 0.80       | 0.83       | 0.90       |
| 44 | 0.94       | 0.92       | 0.86       | 0.90       | 0.77       | 0.86       | 0.68       | 0.76       | 0.90       |
| 45 | 0.94       | 0.85       | 0.83       | 0.86       | 0.88       | 0.84       | 0.84       | 0.91       | 0.89       |
| 46 | 0.96       | 0.93       | 0.91       | 0.91       | 0.97       | 0.89       | 0.95       | 0.97       | 0.95       |
| 47 | 0.85       | 0.65       | 0.77       | 0.84       | 0.79       | 0.75       | 0.87       | 0.86       | 0.86       |
| 48 | 0.96       | 0.81       | 0.88       | 0.91       | 0.93       | 0.94       | 0.95       | 0.94       | 0.94       |
| 49 | 0.77       | 0.78       | 0.82       | 0.93       | 0.84       | 0.70       | 0.73       | 0.82       | 0.76       |
| 50 | 0.41       | 0.45       | 0.42       | 0.41       | 0.55       | 0.34       | 0.38       | 0.44       | 0.63       |
| 51 | 0.96       | 0.90       | 0.90       | 0.96       | 0.96       | 0.90       | 0.79       | 0.92       | 0.98       |
| 52 | 0.81       | 0.79       | 0.63       | 0.68       | 0.68       | 0.68       | 0.48       | 0.63       | 0.82       |
| 53 | 0.43       | 0.56       | 0.47       | 0.48       | 0.55       | 0.46       | 0.42       | 0.52       | 0.58       |
| 54 | 0.96       | 0.94       | 0.85       | 0.95       | 0.95       | 0.91       | 0.93       | 0.90       | 0.90       |
| 55 | 0.90       | 0.90       | 0.84       | 0.90       | 0.96       | 0.97       | 0.82       | 0.89       | 0.94       |

|    |      |      |      |      |      |      |      |      |      |
|----|------|------|------|------|------|------|------|------|------|
| 1  |      |      |      |      |      |      |      |      |      |
| 2  | 0.62 | 0.52 | 0.50 | 0.83 | 0.64 | 0.46 | 0.39 | 0.70 | 0.55 |
| 3  | 0.87 | 0.79 | 0.74 | 0.79 | 0.90 | 0.81 | 0.70 | 0.83 | 0.78 |
| 4  | 0.95 | 0.94 | 0.93 | 0.93 | 0.99 | 0.95 | 0.97 | 0.97 | 0.97 |
| 5  | 0.98 | 0.96 | 0.94 | 0.96 | 0.97 | 0.97 | 1.00 | 0.98 | 0.97 |
| 6  | 0.91 | 0.90 | 0.90 | 0.97 | 0.96 | 0.88 | 0.84 | 0.88 | 0.94 |
| 7  | 0.92 | 0.74 | 0.81 | 0.96 | 0.86 | 0.88 | 0.82 | 0.86 | 0.87 |
| 8  | 0.83 | 0.70 | 0.55 | 0.72 | 0.77 | 0.49 | 0.71 | 0.69 | 0.71 |
| 9  | 0.78 | 0.68 | 0.77 | 0.68 | 0.82 | 0.70 | 0.70 | 0.84 | 0.72 |
| 10 | 0.78 | 0.68 | 0.77 | 0.68 | 0.82 | 0.70 | 0.70 | 0.84 | 0.72 |
| 11 | 0.51 | 0.34 | 0.07 | 0.38 | 0.24 | 0.28 | 0.11 | 0.25 | 0.24 |
| 12 |      |      |      |      |      |      |      |      |      |
| 13 |      |      |      |      |      |      |      |      |      |
| 14 |      |      |      |      |      |      |      |      |      |
| 15 |      |      |      |      |      |      |      |      |      |
| 16 |      |      |      |      |      |      |      |      |      |
| 17 |      |      |      |      |      |      |      |      |      |
| 18 |      |      |      |      |      |      |      |      |      |
| 19 |      |      |      |      |      |      |      |      |      |
| 20 |      |      |      |      |      |      |      |      |      |
| 21 |      |      |      |      |      |      |      |      |      |
| 22 |      |      |      |      |      |      |      |      |      |
| 23 |      |      |      |      |      |      |      |      |      |
| 24 |      |      |      |      |      |      |      |      |      |
| 25 |      |      |      |      |      |      |      |      |      |
| 26 |      |      |      |      |      |      |      |      |      |
| 27 |      |      |      |      |      |      |      |      |      |
| 28 |      |      |      |      |      |      |      |      |      |
| 29 |      |      |      |      |      |      |      |      |      |
| 30 |      |      |      |      |      |      |      |      |      |
| 31 |      |      |      |      |      |      |      |      |      |
| 32 |      |      |      |      |      |      |      |      |      |
| 33 |      |      |      |      |      |      |      |      |      |
| 34 |      |      |      |      |      |      |      |      |      |
| 35 |      |      |      |      |      |      |      |      |      |
| 36 |      |      |      |      |      |      |      |      |      |
| 37 |      |      |      |      |      |      |      |      |      |
| 38 |      |      |      |      |      |      |      |      |      |
| 39 |      |      |      |      |      |      |      |      |      |
| 40 |      |      |      |      |      |      |      |      |      |
| 41 |      |      |      |      |      |      |      |      |      |
| 42 |      |      |      |      |      |      |      |      |      |
| 43 |      |      |      |      |      |      |      |      |      |
| 44 |      |      |      |      |      |      |      |      |      |
| 45 |      |      |      |      |      |      |      |      |      |
| 46 |      |      |      |      |      |      |      |      |      |
| 47 |      |      |      |      |      |      |      |      |      |
| 48 |      |      |      |      |      |      |      |      |      |
| 49 |      |      |      |      |      |      |      |      |      |
| 50 |      |      |      |      |      |      |      |      |      |
| 51 |      |      |      |      |      |      |      |      |      |
| 52 |      |      |      |      |      |      |      |      |      |
| 53 |      |      |      |      |      |      |      |      |      |
| 54 |      |      |      |      |      |      |      |      |      |
| 55 |      |      |      |      |      |      |      |      |      |
| 56 |      |      |      |      |      |      |      |      |      |
| 57 |      |      |      |      |      |      |      |      |      |
| 58 |      |      |      |      |      |      |      |      |      |
| 59 |      |      |      |      |      |      |      |      |      |
| 60 |      |      |      |      |      |      |      |      |      |

For peer review only

1  
2  
3  
4  
5  
6  
7  
8  
9  
10  
11  
12  
13  
14  
15  
16  
17  
18  
19  
20  
21  
22  
23  
24  
25  
26  
27  
28  
29  
30  
31  
32  
33  
34  
35  
36  
37  
38  
39  
40  
41  
42  
43  
44  
45  
46  
47  
48  
49  
50  
51  
52  
53  
54  
55  
56  
57  
58  
59  
60

|  | <b>RAS</b> | <b>RFR</b> | <b>RAX</b> | <b>RWW</b> | <b>RM3</b> | <b>RQM</b> | <b>RVR</b> | <b>RJR</b> | <b>RC1</b> |
|--|------------|------------|------------|------------|------------|------------|------------|------------|------------|
|  | 0.73       | 0.83       | 0.66       | 0.69       | 0.73       | 0.70       | 0.65       | 0.73       | 0.79       |
|  | 0.54       | 0.64       | 0.51       | 0.55       | 0.69       | 0.57       | 0.59       | 0.65       | 0.57       |
|  | 0.52       | 0.67       | 0.48       | 0.52       | 0.66       | 0.45       | 0.55       | 0.57       | 0.45       |
|  | 0.56       | 0.71       | NA         | 0.50       | 0.55       | 0.63       | NA         | 0.60       | 0.63       |
|  | 0.76       | 0.88       | 0.84       | 0.75       | 0.83       | 0.71       | 0.79       | 0.78       | 0.78       |
|  | 0.68       | 0.76       | 0.63       | 0.65       | 0.82       | 0.70       | 0.69       | 0.73       | 0.77       |
|  | 0.53       | 0.62       | 0.39       | 0.49       | 0.58       | 0.56       | 0.47       | 0.54       | 0.61       |
|  | 0.88       | 0.90       | 0.85       | 0.84       | 0.89       | 0.84       | 0.83       | 0.86       | 0.84       |
|  | 0.74       | 0.85       | 0.74       | 0.83       | 0.76       | 0.77       | 0.70       | 0.80       | 0.75       |
|  | 0.85       | 0.89       | 0.79       | 0.79       | 0.89       | 0.78       | 0.82       | 0.85       | 0.82       |
|  | 0.64       | 0.84       | 0.72       | 0.71       | 0.80       | 0.69       | 0.71       | 0.74       | 0.73       |
|  | 0.82       | 0.89       | NA         | 0.75       | 0.89       | 0.89       | NA         | 0.83       | 0.83       |
|  | 0.74       | 0.79       | 0.77       | 0.74       | 0.86       | 0.78       | 0.76       | 0.88       | 0.81       |
|  | 0.71       | 0.74       | 0.57       | 0.59       | 0.74       | 0.60       | 0.68       | 0.70       | 0.67       |
|  | 0.86       | 0.90       | 0.87       | 0.81       | 0.87       | 0.84       | 0.89       | 0.90       | 0.83       |
|  | 0.86       | 0.90       | 0.88       | 0.89       | 0.88       | 0.76       | 0.86       | 0.93       | 0.86       |
|  | 0.77       | 0.81       | 0.80       | 0.69       | 0.86       | 0.71       | 0.79       | 0.86       | 0.79       |
|  | 0.70       | 0.56       | 0.63       | 0.50       | 0.88       | 0.73       | 0.77       | 0.75       | 0.67       |
|  | 0.65       | 0.84       | 0.76       | 0.79       | 0.68       | 0.64       | 0.66       | 0.75       | 0.72       |
|  | 0.79       | 0.80       | 0.72       | 0.66       | 0.76       | 0.67       | 0.74       | 0.81       | 0.73       |
|  | 0.61       | 0.71       | 0.60       | 0.60       | 0.57       | 0.56       | 0.64       | 0.62       | 0.55       |
|  | 0.69       | 0.79       | 0.71       | 0.70       | 0.82       | 0.68       | 0.77       | 0.68       | 0.68       |
|  | 0.96       | 0.99       | 0.97       | 0.94       | 0.95       | 0.90       | 0.91       | 0.99       | 0.95       |
|  | 0.83       | 0.92       | 0.83       | 0.87       | 0.89       | 0.87       | 0.87       | 0.89       | 0.82       |
|  | 0.87       | 0.91       | 0.92       | 0.79       | 0.90       | 0.88       | 0.83       | 0.90       | 0.86       |
|  | 0.39       | 0.50       | 0.30       | 0.38       | 0.45       | 0.38       | 0.38       | 0.44       | 0.30       |
|  | 0.57       | 0.71       | 0.61       | 0.58       | 0.64       | 0.60       | 0.65       | 0.62       | 0.60       |
|  | 0.83       | 0.91       | 0.81       | 0.81       | 0.91       | 0.81       | 0.87       | 0.80       | 0.76       |
|  | 0.92       | 0.90       | 0.70       | 0.68       | 0.96       | 0.83       | 0.90       | 0.93       | 0.89       |
|  | 0.80       | 0.89       | 0.76       | 0.73       | 0.89       | 0.80       | 0.87       | 0.90       | 0.73       |
|  | 0.79       | 0.91       | 0.86       | 0.83       | 0.90       | 0.82       | 0.93       | 0.88       | 0.78       |
|  | 0.79       | 0.88       | 0.87       | 0.76       | 0.87       | 0.81       | 0.88       | 0.85       | 0.82       |
|  | 0.90       | 0.97       | 0.91       | 0.89       | 0.94       | 0.90       | 0.96       | 0.97       | 0.96       |
|  | 0.75       | 0.84       | 0.87       | 0.81       | 0.84       | 0.80       | 0.84       | 0.86       | 0.74       |
|  | 0.90       | 0.95       | 0.93       | 0.90       | 0.93       | 0.88       | 0.92       | 0.90       | 0.84       |
|  | 0.75       | 0.89       | 0.74       | 0.76       | 0.84       | 0.80       | 0.86       | 0.87       | 0.72       |
|  | 0.47       | 0.57       | 0.36       | 0.35       | 0.61       | 0.49       | 0.51       | 0.48       | 0.33       |
|  | 0.88       | 0.99       | 0.95       | 0.91       | 0.94       | 0.89       | 0.95       | 0.99       | 0.86       |
|  | 0.61       | 0.74       | 0.70       | 0.67       | 0.66       | 0.73       | 0.70       | 0.66       | 0.60       |
|  | 0.56       | 0.64       | 0.54       | 0.49       | 0.63       | 0.48       | 0.61       | 0.62       | 0.50       |
|  | 0.91       | 0.91       | 0.87       | 0.86       | 0.93       | 0.90       | 0.92       | 0.87       | 0.88       |
|  | 0.94       | 0.92       | 0.90       | 0.88       | 0.82       | 0.88       | 0.91       | 0.89       | 0.84       |



|    |      |      |      |      |      |      |      |      |      |
|----|------|------|------|------|------|------|------|------|------|
| 1  |      |      |      |      |      |      |      |      |      |
| 2  | 0.56 | 0.62 | 0.53 | 0.64 | 0.59 | 0.50 | 0.61 | 0.60 | 0.43 |
| 3  | 0.69 | 0.82 | 0.60 | 0.73 | 0.78 | 0.61 | 0.78 | 0.83 | 0.71 |
| 4  | 0.97 | 0.93 | 0.91 | 0.93 | 0.97 | 0.93 | 0.97 | 0.97 | 0.98 |
| 5  | 0.97 | 0.96 | 0.97 | 0.94 | 0.98 | 0.93 | 0.98 | 0.97 | 0.99 |
| 6  | 0.85 | 0.99 | 0.90 | 0.85 | 0.94 | 0.84 | 0.92 | 0.90 | 0.85 |
| 7  | 0.81 | 0.87 | 0.79 | 0.75 | 0.84 | 0.85 | 0.91 | 0.93 | 0.79 |
| 8  | 0.71 | 0.70 | 0.49 | 0.69 | 0.76 | 0.49 | 0.63 | 0.69 | 0.54 |
| 9  | 0.66 | 0.73 | 0.78 | 0.75 | 0.75 | 0.64 | 0.68 | 0.73 | 0.64 |
| 10 | 0.66 | 0.73 | 0.78 | 0.75 | 0.75 | 0.64 | 0.68 | 0.73 | 0.64 |
| 11 | 0.24 | 0.30 | 0.14 | 0.10 | 0.37 | 0.23 | 0.30 | 0.22 | 0.13 |
| 12 |      |      |      |      |      |      |      |      |      |
| 13 |      |      |      |      |      |      |      |      |      |
| 14 |      |      |      |      |      |      |      |      |      |
| 15 |      |      |      |      |      |      |      |      |      |
| 16 |      |      |      |      |      |      |      |      |      |
| 17 |      |      |      |      |      |      |      |      |      |
| 18 |      |      |      |      |      |      |      |      |      |
| 19 |      |      |      |      |      |      |      |      |      |
| 20 |      |      |      |      |      |      |      |      |      |
| 21 |      |      |      |      |      |      |      |      |      |
| 22 |      |      |      |      |      |      |      |      |      |
| 23 |      |      |      |      |      |      |      |      |      |
| 24 |      |      |      |      |      |      |      |      |      |
| 25 |      |      |      |      |      |      |      |      |      |
| 26 |      |      |      |      |      |      |      |      |      |
| 27 |      |      |      |      |      |      |      |      |      |
| 28 |      |      |      |      |      |      |      |      |      |
| 29 |      |      |      |      |      |      |      |      |      |
| 30 |      |      |      |      |      |      |      |      |      |
| 31 |      |      |      |      |      |      |      |      |      |
| 32 |      |      |      |      |      |      |      |      |      |
| 33 |      |      |      |      |      |      |      |      |      |
| 34 |      |      |      |      |      |      |      |      |      |
| 35 |      |      |      |      |      |      |      |      |      |
| 36 |      |      |      |      |      |      |      |      |      |
| 37 |      |      |      |      |      |      |      |      |      |
| 38 |      |      |      |      |      |      |      |      |      |
| 39 |      |      |      |      |      |      |      |      |      |
| 40 |      |      |      |      |      |      |      |      |      |
| 41 |      |      |      |      |      |      |      |      |      |
| 42 |      |      |      |      |      |      |      |      |      |
| 43 |      |      |      |      |      |      |      |      |      |
| 44 |      |      |      |      |      |      |      |      |      |
| 45 |      |      |      |      |      |      |      |      |      |
| 46 |      |      |      |      |      |      |      |      |      |
| 47 |      |      |      |      |      |      |      |      |      |
| 48 |      |      |      |      |      |      |      |      |      |
| 49 |      |      |      |      |      |      |      |      |      |
| 50 |      |      |      |      |      |      |      |      |      |
| 51 |      |      |      |      |      |      |      |      |      |
| 52 |      |      |      |      |      |      |      |      |      |
| 53 |      |      |      |      |      |      |      |      |      |
| 54 |      |      |      |      |      |      |      |      |      |
| 55 |      |      |      |      |      |      |      |      |      |
| 56 |      |      |      |      |      |      |      |      |      |
| 57 |      |      |      |      |      |      |      |      |      |
| 58 |      |      |      |      |      |      |      |      |      |
| 59 |      |      |      |      |      |      |      |      |      |
| 60 |      |      |      |      |      |      |      |      |      |

For peer review only

1  
2  
3  
4  
5  
6  
7  
8  
9  
10  
11  
12  
13  
14  
15  
16  
17  
18  
19  
20  
21  
22  
23  
24  
25  
26  
27  
28  
29  
30  
31  
32  
33  
34  
35  
36  
37  
38  
39  
40  
41  
42  
43  
44  
45  
46  
47  
48  
49  
50  
51  
52  
53  
54  
55  
56  
57  
58  
59  
60

|  | <b>RFF</b> | <b>RJ2</b> | <b>RA3</b> | <b>RBT</b> | <b>REN</b> | <b>RRF</b> | <b>RAP</b> | <b>RMC</b> | <b>RLQ</b> |
|--|------------|------------|------------|------------|------------|------------|------------|------------|------------|
|  | 0.76       | 0.66       | 0.71       | 0.73       | 0.74       | 0.70       | 0.64       | 0.81       | 0.76       |
|  | 0.63       | 0.52       | 0.56       | 0.63       | 0.59       | 0.59       | 0.48       | 0.65       | 0.62       |
|  | 0.54       | 0.56       | 0.40       | 0.51       | 0.62       | 0.54       | 0.45       | 0.69       | 0.47       |
|  | 0.63       | 0.61       | NA         | 0.68       | 0.58       | 0.72       | 0.51       | 0.64       | 0.60       |
|  | 0.82       | 0.73       | 0.80       | 0.81       | 0.83       | 0.78       | 0.67       | 0.83       | 0.75       |
|  | 0.75       | 0.72       | 0.65       | 0.73       | 0.70       | 0.74       | 0.60       | 0.79       | 0.74       |
|  | 0.58       | 0.53       | 0.48       | 0.59       | 0.63       | 0.57       | 0.48       | 0.69       | 0.59       |
|  | 0.90       | 0.84       | 0.79       | 0.87       | 0.83       | 0.84       | 0.77       | 0.92       | 0.88       |
|  | 0.77       | 0.73       | 0.71       | 0.82       | 0.79       | 0.84       | 0.69       | 0.81       | 0.84       |
|  | 0.84       | 0.81       | 0.75       | 0.82       | 0.88       | 0.80       | 0.73       | 0.93       | 0.86       |
|  | 0.78       | 0.78       | 0.63       | 0.70       | 0.77       | 0.76       | 0.66       | 0.82       | 0.65       |
|  | 0.93       | 0.86       | 0.89       | 0.80       | 0.87       | 0.93       | 0.85       | 0.92       | 0.84       |
|  | 0.81       | 0.76       | 0.74       | 0.78       | 0.81       | 0.79       | 0.64       | 0.84       | 0.84       |
|  | 0.68       | 0.64       | 0.61       | 0.69       | 0.64       | 0.65       | 0.56       | 0.73       | 0.63       |
|  | 0.89       | 0.82       | 0.85       | 0.89       | 0.89       | 0.88       | 0.76       | 0.91       | 0.78       |
|  | 0.93       | 0.81       | 0.89       | 0.87       | 0.93       | 0.89       | 0.75       | 0.91       | 0.80       |
|  | 0.82       | 0.78       | 0.72       | 0.83       | 0.80       | 0.77       | 0.62       | 0.86       | 0.81       |
|  | 0.76       | 0.73       | 0.62       | 0.76       | 0.64       | 0.69       | 0.54       | 0.72       | 0.72       |
|  | 0.86       | 0.72       | 0.77       | 0.77       | 0.78       | 0.84       | 0.55       | 0.81       | 0.70       |
|  | 0.72       | 0.77       | 0.71       | 0.72       | 0.73       | 0.75       | 0.67       | 0.84       | 0.75       |
|  | 0.63       | 0.52       | 0.45       | 0.71       | 0.67       | 0.69       | 0.52       | 0.69       | 0.73       |
|  | 0.79       | 0.71       | 0.67       | 0.71       | 0.69       | 0.70       | 0.56       | 0.81       | 0.69       |
|  | 1.00       | 0.96       | 0.94       | 0.99       | 0.96       | 0.97       | 0.95       | 0.98       | 0.94       |
|  | 0.92       | 0.80       | 0.85       | 0.81       | 0.84       | 0.89       | 0.69       | 0.91       | 0.82       |
|  | 0.92       | 0.87       | 0.85       | 0.91       | 0.88       | 0.93       | 0.85       | 0.92       | 0.89       |
|  | 0.41       | 0.31       | 0.28       | 0.32       | 0.37       | 0.41       | 0.40       | 0.26       | 0.32       |
|  | 0.70       | 0.54       | 0.58       | 0.73       | 0.68       | 0.67       | 0.49       | 0.71       | 0.68       |
|  | 0.88       | 0.86       | 0.86       | 0.85       | 0.80       | 0.85       | 0.69       | 0.88       | 0.83       |
|  | 0.89       | 0.86       | 0.85       | 0.86       | 0.82       | 0.86       | 0.72       | 0.91       | 0.87       |
|  | 0.85       | 0.81       | 0.82       | 0.78       | 0.86       | 0.84       | 0.76       | 0.88       | 0.76       |
|  | 0.91       | 0.84       | 0.84       | 0.87       | 0.84       | 0.82       | 0.77       | 0.91       | 0.84       |
|  | 0.85       | 0.82       | 0.81       | 0.88       | 0.86       | 0.89       | 0.79       | 0.93       | 0.86       |
|  | 0.94       | 0.91       | 0.91       | 0.95       | 0.95       | 0.91       | 0.92       | 0.93       | 0.96       |
|  | 0.90       | 0.75       | 0.79       | 0.82       | 0.83       | 0.85       | 0.65       | 0.83       | 0.76       |
|  | 0.88       | 0.87       | 0.92       | 0.89       | 0.90       | 0.89       | 0.83       | 0.94       | 0.92       |
|  | 0.90       | 0.83       | 0.86       | 0.82       | 0.80       | 0.84       | 0.82       | 0.81       | 0.77       |
|  | 0.54       | 0.44       | 0.34       | 0.45       | 0.51       | 0.52       | 0.25       | 0.57       | 0.65       |
|  | 0.96       | 0.97       | 0.93       | 0.97       | 0.95       | 0.93       | 0.87       | 0.94       | 0.90       |
|  | 0.78       | 0.62       | 0.67       | 0.60       | 0.72       | 0.72       | 0.55       | 0.75       | 0.77       |
|  | 0.61       | 0.46       | 0.43       | 0.63       | 0.60       | 0.55       | 0.49       | 0.59       | 0.67       |
|  | 0.93       | 0.88       | 0.88       | 0.91       | 0.93       | 0.90       | 0.83       | 0.95       | 0.91       |
|  | 0.91       | 0.84       | 0.88       | 0.88       | 0.92       | 0.87       | 0.86       | 0.94       | 0.87       |

|    |      |      |      |      |      |      |      |      |      |
|----|------|------|------|------|------|------|------|------|------|
| 1  |      |      |      |      |      |      |      |      |      |
| 2  | 0.62 | 0.62 | 0.69 | 0.54 | 0.61 | 0.51 | 0.56 | 0.63 | 0.55 |
| 3  | 0.74 | 0.72 | 0.75 | 0.75 | 0.77 | 0.87 | 0.71 | 0.88 | 0.74 |
| 4  | 0.95 | 0.92 | 0.98 | 0.93 | 0.95 | 0.97 | 0.90 | 0.97 | 0.95 |
| 5  | 0.96 | 0.95 | 0.97 | 0.96 | 0.96 | 0.95 | 0.92 | 0.98 | 0.97 |
| 6  | 0.89 | 0.95 | 0.90 | 0.93 | 0.88 | 0.91 | 0.91 | 0.92 | 0.89 |
| 7  | 0.88 | 0.84 | 0.83 | 0.83 | 0.91 | 0.86 | 0.84 | 0.91 | 0.84 |
| 8  | 0.65 | 0.63 | 0.74 | 0.78 | 0.65 | 0.80 | 0.39 | 0.75 | 0.70 |
| 9  | 0.81 | 0.69 | 0.71 | 0.75 | 0.76 | 0.86 | 0.50 | 0.81 | 0.74 |
| 10 | 0.81 | 0.69 | 0.71 | 0.75 | 0.76 | 0.86 | 0.50 | 0.81 | 0.74 |
| 11 | 0.18 | 0.18 | 0.27 | 0.15 | 0.20 | 0.17 | 0.26 | 0.16 | 0.28 |
| 12 |      |      |      |      |      |      |      |      |      |
| 13 |      |      |      |      |      |      |      |      |      |
| 14 |      |      |      |      |      |      |      |      |      |
| 15 |      |      |      |      |      |      |      |      |      |
| 16 |      |      |      |      |      |      |      |      |      |
| 17 |      |      |      |      |      |      |      |      |      |
| 18 |      |      |      |      |      |      |      |      |      |
| 19 |      |      |      |      |      |      |      |      |      |
| 20 |      |      |      |      |      |      |      |      |      |
| 21 |      |      |      |      |      |      |      |      |      |
| 22 |      |      |      |      |      |      |      |      |      |
| 23 |      |      |      |      |      |      |      |      |      |
| 24 |      |      |      |      |      |      |      |      |      |
| 25 |      |      |      |      |      |      |      |      |      |
| 26 |      |      |      |      |      |      |      |      |      |
| 27 |      |      |      |      |      |      |      |      |      |
| 28 |      |      |      |      |      |      |      |      |      |
| 29 |      |      |      |      |      |      |      |      |      |
| 30 |      |      |      |      |      |      |      |      |      |
| 31 |      |      |      |      |      |      |      |      |      |
| 32 |      |      |      |      |      |      |      |      |      |
| 33 |      |      |      |      |      |      |      |      |      |
| 34 |      |      |      |      |      |      |      |      |      |
| 35 |      |      |      |      |      |      |      |      |      |
| 36 |      |      |      |      |      |      |      |      |      |
| 37 |      |      |      |      |      |      |      |      |      |
| 38 |      |      |      |      |      |      |      |      |      |
| 39 |      |      |      |      |      |      |      |      |      |
| 40 |      |      |      |      |      |      |      |      |      |
| 41 |      |      |      |      |      |      |      |      |      |
| 42 |      |      |      |      |      |      |      |      |      |
| 43 |      |      |      |      |      |      |      |      |      |
| 44 |      |      |      |      |      |      |      |      |      |
| 45 |      |      |      |      |      |      |      |      |      |
| 46 |      |      |      |      |      |      |      |      |      |
| 47 |      |      |      |      |      |      |      |      |      |
| 48 |      |      |      |      |      |      |      |      |      |
| 49 |      |      |      |      |      |      |      |      |      |
| 50 |      |      |      |      |      |      |      |      |      |
| 51 |      |      |      |      |      |      |      |      |      |
| 52 |      |      |      |      |      |      |      |      |      |
| 53 |      |      |      |      |      |      |      |      |      |
| 54 |      |      |      |      |      |      |      |      |      |
| 55 |      |      |      |      |      |      |      |      |      |
| 56 |      |      |      |      |      |      |      |      |      |
| 57 |      |      |      |      |      |      |      |      |      |
| 58 |      |      |      |      |      |      |      |      |      |
| 59 |      |      |      |      |      |      |      |      |      |
| 60 |      |      |      |      |      |      |      |      |      |

For peer review only

1  
2  
3  
4  
5  
6  
7  
8  
9  
10  
11  
12  
13  
14  
15  
16  
17  
18  
19  
20  
21  
22  
23  
24  
25  
26  
27  
28  
29  
30  
31  
32  
33  
34  
35  
36  
37  
38  
39  
40  
41  
42  
43  
44  
45  
46  
47  
48  
49  
50  
51  
52  
53  
54  
55  
56  
57  
58  
59  
60

| RLT  | RDZ  | RBK  | RQQ  | RBN  | RDD  | RFS  | RTK  | RCF  |
|------|------|------|------|------|------|------|------|------|
| 0.76 | 0.82 | 0.75 | 0.72 | 0.81 | 0.71 | 0.68 | 0.67 | 0.73 |
| 0.65 | 0.73 | 0.55 | 0.55 | 0.71 | 0.52 | 0.60 | 0.54 | 0.57 |
| 0.55 | 0.58 | 0.50 | 0.49 | 0.66 | 0.55 | 0.49 | 0.43 | 0.53 |
| 0.60 | 0.69 | 0.47 | 0.65 | 0.90 | 0.57 | 0.62 | 0.72 | 0.50 |
| 0.77 | 0.82 | 0.77 | 0.79 | 0.85 | 0.78 | 0.77 | 0.75 | 0.78 |
| 0.76 | 0.76 | 0.68 | 0.67 | 0.76 | 0.69 | 0.72 | 0.66 | 0.71 |
| 0.58 | 0.62 | 0.52 | 0.51 | 0.65 | 0.52 | 0.56 | 0.48 | 0.53 |
| 0.82 | 0.90 | 0.81 | 0.82 | 0.91 | 0.84 | 0.86 | 0.84 | 0.82 |
| 0.72 | 0.87 | 0.77 | 0.73 | 0.88 | 0.79 | 0.84 | 0.80 | 0.79 |
| 0.85 | 0.86 | 0.80 | 0.80 | 0.84 | 0.80 | 0.80 | 0.78 | 0.82 |
| 0.81 | 0.81 | 0.73 | 0.71 | 0.78 | 0.68 | 0.72 | 0.69 | 0.66 |
| 0.81 | 0.83 | 0.75 | 0.68 | 0.96 | 0.85 | 0.96 | 0.90 | 0.90 |
| 0.79 | 0.80 | 0.72 | 0.79 | 0.83 | 0.77 | 0.80 | 0.77 | 0.74 |
| 0.68 | 0.75 | 0.62 | 0.66 | 0.66 | 0.60 | 0.68 | 0.61 | 0.64 |
| 0.85 | 0.88 | 0.82 | 0.86 | 0.92 | 0.84 | 0.87 | 0.89 | 0.90 |
| 0.83 | 0.92 | 0.84 | 0.91 | 0.91 | 0.83 | 0.88 | 0.88 | 0.83 |
| 0.79 | 0.83 | 0.73 | 0.79 | 0.81 | 0.77 | 0.80 | 0.70 | 0.77 |
| 0.81 | 0.70 | 0.65 | 0.69 | 0.63 | 0.62 | 0.72 | 0.69 | 0.64 |
| 0.70 | 0.77 | 0.68 | 0.75 | 0.75 | 0.70 | 0.73 | 0.72 | 0.68 |
| 0.74 | 0.77 | 0.70 | 0.74 | 0.73 | 0.74 | 0.73 | 0.72 | 0.78 |
| 0.54 | 0.62 | 0.56 | 0.62 | 0.67 | 0.55 | 0.71 | 0.59 | 0.70 |
| 0.80 | 0.80 | 0.65 | 0.70 | 0.71 | 0.69 | 0.74 | 0.63 | 0.73 |
| 0.97 | 0.97 | 0.96 | 0.93 | 0.98 | 0.97 | 0.93 | 0.97 | 0.95 |
| 0.84 | 0.92 | 0.81 | 0.86 | 0.93 | 0.79 | 0.84 | 0.82 | 0.85 |
| 0.88 | 0.92 | 0.86 | 0.88 | 0.91 | 0.87 | 0.91 | 0.88 | 0.90 |
| 0.40 | 0.34 | 0.40 | 0.27 | 0.35 | 0.32 | 0.35 | 0.33 | 0.38 |
| 0.65 | 0.74 | 0.58 | 0.66 | 0.68 | 0.58 | 0.68 | 0.64 | 0.61 |
| 0.83 | 0.85 | 0.76 | 0.84 | 0.87 | 0.88 | 0.82 | 0.83 | 0.77 |
| 0.92 | 0.81 | 0.76 | 0.78 | 0.89 | 0.86 | 0.90 | 0.80 | 0.80 |
| 0.84 | 0.83 | 0.82 | 0.76 | 0.87 | 0.80 | 0.84 | 0.77 | 0.81 |
| 0.87 | 0.91 | 0.84 | 0.82 | 0.89 | 0.82 | 0.85 | 0.83 | 0.86 |
| 0.85 | 0.91 | 0.82 | 0.88 | 0.91 | 0.86 | 0.89 | 0.84 | 0.90 |
| 0.94 | 0.94 | 0.94 | 0.93 | 0.93 | 0.93 | 0.93 | 0.96 | 0.96 |
| 0.76 | 0.92 | 0.78 | 0.75 | 0.90 | 0.76 | 0.80 | 0.84 | 0.88 |
| 0.94 | 0.95 | 0.85 | 0.91 | 0.94 | 0.88 | 0.89 | 0.87 | 0.90 |
| 0.91 | 0.86 | 0.82 | 0.78 | 0.86 | 0.81 | 0.79 | 0.82 | 0.79 |
| 0.50 | 0.57 | 0.31 | 0.53 | 0.53 | 0.47 | 0.47 | 0.41 | 0.47 |
| 0.91 | 0.97 | 0.94 | 0.95 | 0.96 | 0.88 | 0.94 | 0.88 | 0.93 |
| 0.63 | 0.76 | 0.66 | 0.68 | 0.78 | 0.64 | 0.65 | 0.67 | 0.55 |
| 0.53 | 0.64 | 0.42 | 0.61 | 0.57 | 0.55 | 0.55 | 0.44 | 0.62 |
| 0.95 | 0.94 | 0.85 | 0.90 | 0.91 | 0.94 | 0.93 | 0.89 | 0.92 |
| 0.93 | 0.92 | 0.84 | 0.93 | 0.92 | 0.86 | 0.91 | 0.88 | 0.92 |

|    |      |      |      |      |      |      |      |      |      |
|----|------|------|------|------|------|------|------|------|------|
| 1  |      |      |      |      |      |      |      |      |      |
| 2  | 0.61 | 0.52 | 0.70 | 0.50 | 0.63 | 0.60 | 0.44 | 0.44 | 0.63 |
| 3  | 0.73 | 0.89 | 0.74 | 0.73 | 0.73 | 0.73 | 0.74 | 0.70 | 0.78 |
| 4  | 0.97 | 0.97 | 0.92 | 0.95 | 0.96 | 0.94 | 0.96 | 0.97 | 0.98 |
| 5  | 0.98 | 0.99 | 0.92 | 0.96 | 0.98 | 0.95 | 0.96 | 0.95 | 0.98 |
| 6  | 0.92 | 0.93 | 0.89 | 0.89 | 0.90 | 0.90 | 0.83 | 0.89 | 0.86 |
| 7  | 0.86 | 0.90 | 0.83 | 0.83 | 0.92 | 0.78 | 0.86 | 0.77 | 0.86 |
| 8  | 0.66 | 0.73 | 0.67 | 0.53 | 0.71 | 0.56 | 0.72 | 0.72 | 0.72 |
| 9  | 0.77 | 0.77 | 0.64 | 0.75 | 0.82 | 0.79 | 0.66 | 0.76 | 0.57 |
| 10 | 0.77 | 0.77 | 0.64 | 0.75 | 0.82 | 0.79 | 0.66 | 0.76 | 0.57 |
| 11 | 0.29 | 0.19 | 0.29 | 0.25 | 0.11 | 0.13 | 0.20 | 0.18 | 0.31 |
| 12 |      |      |      |      |      |      |      |      |      |
| 13 |      |      |      |      |      |      |      |      |      |
| 14 |      |      |      |      |      |      |      |      |      |
| 15 |      |      |      |      |      |      |      |      |      |
| 16 |      |      |      |      |      |      |      |      |      |
| 17 |      |      |      |      |      |      |      |      |      |
| 18 |      |      |      |      |      |      |      |      |      |
| 19 |      |      |      |      |      |      |      |      |      |
| 20 |      |      |      |      |      |      |      |      |      |
| 21 |      |      |      |      |      |      |      |      |      |
| 22 |      |      |      |      |      |      |      |      |      |
| 23 |      |      |      |      |      |      |      |      |      |
| 24 |      |      |      |      |      |      |      |      |      |
| 25 |      |      |      |      |      |      |      |      |      |
| 26 |      |      |      |      |      |      |      |      |      |
| 27 |      |      |      |      |      |      |      |      |      |
| 28 |      |      |      |      |      |      |      |      |      |
| 29 |      |      |      |      |      |      |      |      |      |
| 30 |      |      |      |      |      |      |      |      |      |
| 31 |      |      |      |      |      |      |      |      |      |
| 32 |      |      |      |      |      |      |      |      |      |
| 33 |      |      |      |      |      |      |      |      |      |
| 34 |      |      |      |      |      |      |      |      |      |
| 35 |      |      |      |      |      |      |      |      |      |
| 36 |      |      |      |      |      |      |      |      |      |
| 37 |      |      |      |      |      |      |      |      |      |
| 38 |      |      |      |      |      |      |      |      |      |
| 39 |      |      |      |      |      |      |      |      |      |
| 40 |      |      |      |      |      |      |      |      |      |
| 41 |      |      |      |      |      |      |      |      |      |
| 42 |      |      |      |      |      |      |      |      |      |
| 43 |      |      |      |      |      |      |      |      |      |
| 44 |      |      |      |      |      |      |      |      |      |
| 45 |      |      |      |      |      |      |      |      |      |
| 46 |      |      |      |      |      |      |      |      |      |
| 47 |      |      |      |      |      |      |      |      |      |
| 48 |      |      |      |      |      |      |      |      |      |
| 49 |      |      |      |      |      |      |      |      |      |
| 50 |      |      |      |      |      |      |      |      |      |
| 51 |      |      |      |      |      |      |      |      |      |
| 52 |      |      |      |      |      |      |      |      |      |
| 53 |      |      |      |      |      |      |      |      |      |
| 54 |      |      |      |      |      |      |      |      |      |
| 55 |      |      |      |      |      |      |      |      |      |
| 56 |      |      |      |      |      |      |      |      |      |
| 57 |      |      |      |      |      |      |      |      |      |
| 58 |      |      |      |      |      |      |      |      |      |
| 59 |      |      |      |      |      |      |      |      |      |
| 60 |      |      |      |      |      |      |      |      |      |

For peer review only

1  
2  
3  
4  
5  
6  
7  
8  
9  
10  
11  
12  
13  
14  
15  
16  
17  
18  
19  
20  
21  
22  
23  
24  
25  
26  
27  
28  
29  
30  
31  
32  
33  
34  
35  
36  
37  
38  
39  
40  
41  
42  
43  
44  
45  
46  
47  
48  
49  
50  
51  
52  
53  
54  
55  
56  
57  
58  
59  
60

| <b>RWG</b> | <b>REM</b> | <b>RJF</b> | <b>RQW</b> | <b>RCB</b> | <b>RF4</b> | <b>RK5</b> | <b>RCD</b> | <b>RBZ</b> |
|------------|------------|------------|------------|------------|------------|------------|------------|------------|
| 0.74       | 0.72       | 0.72       | 0.76       | 0.76       | 0.76       | 0.66       | 0.77       | 0.73       |
| 0.59       | 0.57       | 0.58       | 0.54       | 0.60       | 0.50       | 0.55       | 0.62       | 0.57       |
| 0.49       | 0.49       | 0.52       | 0.54       | 0.57       | 0.49       | 0.45       | 0.63       | 0.58       |
| 0.63       | 0.47       | 0.55       | 0.59       | 0.65       | 0.50       | 0.42       | 0.57       | 0.43       |
| 0.79       | 0.77       | 0.79       | 0.80       | 0.82       | 0.76       | 0.72       | 0.81       | 0.78       |
| 0.69       | 0.70       | 0.69       | 0.68       | 0.75       | 0.70       | 0.67       | 0.75       | 0.73       |
| 0.47       | 0.52       | 0.53       | 0.48       | 0.61       | 0.53       | 0.56       | 0.60       | 0.52       |
| 0.83       | 0.84       | 0.86       | 0.84       | 0.89       | 0.86       | 0.79       | 0.89       | 0.85       |
| 0.83       | 0.80       | 0.76       | 0.81       | 0.80       | 0.82       | 0.81       | 0.81       | 0.77       |
| 0.81       | 0.86       | 0.81       | 0.82       | 0.87       | 0.81       | 0.76       | 0.85       | 0.79       |
| 0.66       | 0.76       | 0.62       | 0.68       | 0.77       | 0.74       | 0.75       | 0.84       | 0.73       |
| 0.85       | 0.80       | 0.92       | 0.73       | 0.87       | 0.79       | 0.76       | 0.82       | 0.83       |
| 0.79       | 0.81       | 0.77       | 0.83       | 0.83       | 0.78       | 0.69       | 0.85       | 0.82       |
| 0.62       | 0.62       | 0.62       | 0.60       | 0.76       | 0.67       | 0.63       | 0.76       | 0.68       |
| 0.85       | 0.89       | 0.89       | 0.84       | 0.84       | 0.86       | 0.88       | 0.89       | 0.89       |
| 0.88       | 0.87       | 0.88       | 0.87       | 0.88       | 0.85       | 0.90       | 0.88       | 0.92       |
| 0.77       | 0.77       | 0.77       | 0.79       | 0.81       | 0.73       | 0.71       | 0.85       | 0.80       |
| 0.69       | 0.58       | 0.66       | 0.70       | 0.66       | 0.59       | 0.55       | 0.77       | 0.67       |
| 0.74       | 0.74       | 0.76       | 0.71       | 0.73       | 0.66       | 0.80       | 0.74       | 0.81       |
| 0.74       | 0.64       | 0.72       | 0.73       | 0.79       | 0.74       | 0.69       | 0.87       | 0.78       |
| 0.64       | 0.61       | 0.58       | 0.65       | 0.68       | 0.56       | 0.54       | 0.66       | 0.71       |
| 0.71       | 0.65       | 0.77       | 0.67       | 0.74       | 0.67       | 0.65       | 0.82       | 0.71       |
| 0.98       | 0.94       | 0.98       | 0.96       | 0.97       | 0.96       | 0.94       | 0.99       | 0.96       |
| 0.87       | 0.88       | 0.83       | 0.83       | 0.89       | 0.85       | 0.86       | 0.87       | 0.86       |
| 0.86       | 0.92       | 0.87       | 0.91       | 0.94       | 0.84       | 0.85       | 0.93       | 0.92       |
| 0.31       | 0.33       | 0.28       | 0.31       | 0.40       | 0.36       | 0.28       | 0.43       | 0.27       |
| 0.58       | 0.68       | 0.64       | 0.58       | 0.62       | 0.55       | 0.61       | 0.70       | 0.71       |
| 0.82       | 0.80       | 0.85       | 0.80       | 0.84       | 0.80       | 0.83       | 0.84       | 0.88       |
| 0.82       | 0.84       | 0.86       | 0.84       | 0.86       | 0.82       | 0.83       | 0.90       | 0.84       |
| 0.78       | 0.76       | 0.81       | 0.79       | 0.85       | 0.77       | 0.70       | 0.92       | 0.81       |
| 0.86       | 0.84       | 0.84       | 0.85       | 0.89       | 0.84       | 0.81       | 0.91       | 0.84       |
| 0.84       | 0.86       | 0.85       | 0.85       | 0.87       | 0.81       | 0.90       | 0.90       | 0.87       |
| 0.93       | 0.93       | 0.94       | 0.94       | 0.94       | 0.91       | 0.94       | 0.96       | 0.98       |
| 0.80       | 0.87       | 0.85       | 0.72       | 0.86       | 0.78       | 0.83       | 0.87       | 0.78       |
| 0.93       | 0.88       | 0.90       | 0.88       | 0.92       | 0.84       | 0.85       | 0.92       | 0.91       |
| 0.85       | 0.88       | 0.71       | 0.76       | 0.86       | 0.80       | 0.77       | 0.93       | 0.85       |
| 0.51       | 0.51       | 0.41       | 0.40       | 0.49       | 0.29       | 0.28       | 0.67       | 0.51       |
| 0.92       | 0.94       | 0.94       | 0.90       | 0.98       | 0.93       | 0.94       | 0.96       | 0.95       |
| 0.66       | 0.59       | 0.68       | 0.57       | 0.63       | 0.65       | 0.67       | 0.72       | 0.65       |
| 0.58       | 0.64       | 0.45       | 0.49       | 0.59       | 0.41       | 0.38       | 0.71       | 0.69       |
| 0.87       | 0.91       | 0.92       | 0.90       | 0.92       | 0.91       | 0.87       | 0.98       | 0.95       |
| 0.89       | 0.89       | 0.84       | 0.86       | 0.87       | 0.85       | 0.85       | 0.93       | 0.95       |

|    |      |      |      |      |      |      |      |      |      |
|----|------|------|------|------|------|------|------|------|------|
| 1  |      |      |      |      |      |      |      |      |      |
| 2  | 0.57 | 0.55 | 0.53 | 0.50 | 0.69 | 0.47 | 0.42 | 0.86 | 0.59 |
| 3  | 0.73 | 0.75 | 0.82 | 0.72 | 0.73 | 0.73 | 0.78 | 0.77 | 0.78 |
| 4  | 0.96 | 0.94 | 0.97 | 0.94 | 0.98 | 0.90 | 0.96 | 0.97 | 0.97 |
| 5  | 0.94 | 0.97 | 0.96 | 0.94 | 0.96 | 0.97 | 0.97 | 0.99 | 0.97 |
| 6  | 0.90 | 0.89 | 0.91 | 0.91 | 0.92 | 0.94 | 0.87 | 0.97 | 0.91 |
| 7  | 0.89 | 0.80 | 0.74 | 0.81 | 0.87 | 0.71 | 0.72 | 0.92 | 0.83 |
| 8  | 0.68 | 0.69 | 0.72 | 0.62 | 0.68 | 0.52 | 0.82 | 0.82 | 0.85 |
| 9  | 0.64 | 0.70 | 0.49 | 0.70 | 0.77 | 0.64 | 0.61 | 0.84 | 0.71 |
| 10 | 0.64 | 0.70 | 0.49 | 0.70 | 0.77 | 0.64 | 0.61 | 0.84 | 0.71 |
| 11 | 0.12 | 0.20 | 0.27 | 0.27 | 0.24 | 0.23 | 0.19 | 0.24 | 0.23 |
| 12 |      |      |      |      |      |      |      |      |      |
| 13 |      |      |      |      |      |      |      |      |      |
| 14 |      |      |      |      |      |      |      |      |      |
| 15 |      |      |      |      |      |      |      |      |      |
| 16 |      |      |      |      |      |      |      |      |      |
| 17 |      |      |      |      |      |      |      |      |      |
| 18 |      |      |      |      |      |      |      |      |      |
| 19 |      |      |      |      |      |      |      |      |      |
| 20 |      |      |      |      |      |      |      |      |      |
| 21 |      |      |      |      |      |      |      |      |      |
| 22 |      |      |      |      |      |      |      |      |      |
| 23 |      |      |      |      |      |      |      |      |      |
| 24 |      |      |      |      |      |      |      |      |      |
| 25 |      |      |      |      |      |      |      |      |      |
| 26 |      |      |      |      |      |      |      |      |      |
| 27 |      |      |      |      |      |      |      |      |      |
| 28 |      |      |      |      |      |      |      |      |      |
| 29 |      |      |      |      |      |      |      |      |      |
| 30 |      |      |      |      |      |      |      |      |      |
| 31 |      |      |      |      |      |      |      |      |      |
| 32 |      |      |      |      |      |      |      |      |      |
| 33 |      |      |      |      |      |      |      |      |      |
| 34 |      |      |      |      |      |      |      |      |      |
| 35 |      |      |      |      |      |      |      |      |      |
| 36 |      |      |      |      |      |      |      |      |      |
| 37 |      |      |      |      |      |      |      |      |      |
| 38 |      |      |      |      |      |      |      |      |      |
| 39 |      |      |      |      |      |      |      |      |      |
| 40 |      |      |      |      |      |      |      |      |      |
| 41 |      |      |      |      |      |      |      |      |      |
| 42 |      |      |      |      |      |      |      |      |      |
| 43 |      |      |      |      |      |      |      |      |      |
| 44 |      |      |      |      |      |      |      |      |      |
| 45 |      |      |      |      |      |      |      |      |      |
| 46 |      |      |      |      |      |      |      |      |      |
| 47 |      |      |      |      |      |      |      |      |      |
| 48 |      |      |      |      |      |      |      |      |      |
| 49 |      |      |      |      |      |      |      |      |      |
| 50 |      |      |      |      |      |      |      |      |      |
| 51 |      |      |      |      |      |      |      |      |      |
| 52 |      |      |      |      |      |      |      |      |      |
| 53 |      |      |      |      |      |      |      |      |      |
| 54 |      |      |      |      |      |      |      |      |      |
| 55 |      |      |      |      |      |      |      |      |      |
| 56 |      |      |      |      |      |      |      |      |      |
| 57 |      |      |      |      |      |      |      |      |      |
| 58 |      |      |      |      |      |      |      |      |      |
| 59 |      |      |      |      |      |      |      |      |      |
| 60 |      |      |      |      |      |      |      |      |      |

For peer review only

1  
2  
3  
4  
5  
6  
7  
8  
9  
10  
11  
12  
13  
14  
15  
16  
17  
18  
19  
20  
21  
22  
23  
24  
25  
26  
27  
28  
29  
30  
31  
32  
33  
34  
35  
36  
37  
38  
39  
40  
41  
42  
43  
44  
45  
46  
47  
48  
49  
50  
51  
52  
53  
54  
55  
56  
57  
58  
59  
60

|  | <b>RTP</b> | <b>RWJ</b> | <b>RC9</b> | <b>RGP</b> | <b>RD8</b> | <b>RBD</b> | <b>RNQ</b> | <b>RP5</b> | <b>RVJ</b> |
|--|------------|------------|------------|------------|------------|------------|------------|------------|------------|
|  | 0.74       | 0.75       | 0.75       | 0.73       | 0.65       | 0.75       | 0.77       | 0.72       | 0.79       |
|  | 0.56       | 0.52       | 0.62       | 0.60       | 0.47       | 0.56       | 0.54       | 0.54       | 0.56       |
|  | 0.45       | 0.47       | 0.57       | 0.54       | 0.44       | 0.52       | 0.52       | 0.51       | 0.49       |
|  | 0.66       | 0.64       | 0.62       | 0.67       | 0.68       | 0.69       | 0.61       | 0.50       | 0.50       |
|  | 0.73       | 0.80       | 0.82       | 0.73       | 0.73       | 0.80       | 0.85       | 0.78       | 0.74       |
|  | 0.72       | 0.69       | 0.75       | 0.68       | 0.68       | 0.70       | 0.72       | 0.64       | 0.70       |
|  | 0.50       | 0.55       | 0.56       | 0.52       | 0.47       | 0.51       | 0.53       | 0.54       | 0.54       |
|  | 0.82       | 0.83       | 0.87       | 0.81       | 0.81       | 0.85       | 0.86       | 0.85       | 0.87       |
|  | 0.83       | 0.77       | 0.76       | 0.76       | 0.80       | 0.78       | 0.79       | 0.77       | 0.77       |
|  | 0.84       | 0.81       | 0.85       | 0.77       | 0.78       | 0.81       | 0.83       | 0.80       | 0.84       |
|  | 0.67       | 0.74       | 0.76       | 0.76       | 0.72       | 0.76       | 0.75       | 0.74       | 0.74       |
|  | 0.92       | 0.86       | 0.92       | 0.85       | 0.86       | 0.84       | 0.81       | 0.81       | 0.82       |
|  | 0.76       | 0.81       | 0.83       | 0.79       | 0.70       | 0.84       | 0.78       | 0.76       | 0.79       |
|  | 0.66       | 0.63       | 0.68       | 0.66       | 0.63       | 0.66       | 0.67       | 0.61       | 0.64       |
|  | 0.88       | 0.81       | 0.88       | 0.88       | 0.87       | 0.86       | 0.87       | 0.87       | 0.94       |
|  | 0.94       | 0.88       | 0.88       | 0.88       | 0.85       | 0.90       | 0.92       | 0.85       | 0.88       |
|  | 0.79       | 0.75       | 0.80       | 0.76       | 0.72       | 0.80       | 0.74       | 0.72       | 0.83       |
|  | 0.71       | 0.77       | 0.71       | 0.59       | 0.53       | 0.71       | 0.68       | 0.58       | 0.68       |
|  | 0.69       | 0.74       | 0.74       | 0.77       | 0.68       | 0.81       | 0.72       | 0.75       | 0.75       |
|  | 0.77       | 0.76       | 0.72       | 0.73       | 0.63       | 0.71       | 0.74       | 0.71       | 0.75       |
|  | 0.58       | 0.62       | 0.60       | 0.65       | 0.54       | 0.68       | 0.61       | 0.59       | 0.60       |
|  | 0.70       | 0.72       | 0.71       | 0.74       | 0.65       | 0.73       | 0.68       | 0.71       | 0.73       |
|  | 0.96       | 0.96       | 0.96       | 0.96       | 0.90       | 0.97       | 0.97       | 0.97       | 0.96       |
|  | 0.85       | 0.83       | 0.86       | 0.83       | 0.84       | 0.84       | 0.86       | 0.81       | 0.86       |
|  | 0.87       | 0.92       | 0.87       | 0.86       | 0.87       | 0.91       | 0.84       | 0.87       | 0.84       |
|  | 0.30       | 0.31       | 0.45       | 0.34       | 0.31       | 0.31       | 0.30       | 0.32       | 0.40       |
|  | 0.60       | 0.60       | 0.62       | 0.65       | 0.55       | 0.62       | 0.56       | 0.53       | 0.65       |
|  | 0.81       | 0.84       | 0.83       | 0.86       | 0.83       | 0.85       | 0.87       | 0.85       | 0.83       |
|  | 0.88       | 0.86       | 0.92       | 0.81       | 0.81       | 0.85       | 0.88       | 0.74       | 0.82       |
|  | 0.79       | 0.77       | 0.85       | 0.77       | 0.80       | 0.81       | 0.77       | 0.79       | 0.87       |
|  | 0.89       | 0.87       | 0.86       | 0.80       | 0.82       | 0.83       | 0.86       | 0.84       | 0.91       |
|  | 0.83       | 0.87       | 0.84       | 0.83       | 0.83       | 0.84       | 0.82       | 0.83       | 0.83       |
|  | 0.95       | 0.96       | 0.96       | 0.93       | 0.92       | 0.98       | 0.94       | 0.92       | 0.92       |
|  | 0.86       | 0.80       | 0.78       | 0.75       | 0.77       | 0.82       | 0.78       | 0.83       | 0.87       |
|  | 0.84       | 0.89       | 0.86       | 0.91       | 0.86       | 0.92       | 0.84       | 0.83       | 0.90       |
|  | 0.88       | 0.82       | 0.86       | 0.82       | 0.69       | 0.77       | 0.80       | 0.77       | 0.73       |
|  | 0.35       | 0.51       | 0.52       | 0.45       | 0.30       | 0.48       | 0.42       | 0.35       | 0.40       |
|  | 0.94       | 0.93       | 0.93       | 0.94       | 0.91       | 0.98       | 0.91       | 0.92       | 0.92       |
|  | 0.70       | 0.64       | 0.66       | 0.58       | 0.53       | 0.67       | 0.62       | 0.57       | 0.68       |
|  | 0.49       | 0.55       | 0.70       | 0.53       | 0.39       | 0.62       | 0.47       | 0.54       | 0.57       |
|  | 0.86       | 0.90       | 0.92       | 0.93       | 0.87       | 0.89       | 0.83       | 0.83       | 0.85       |
|  | 0.82       | 0.84       | 0.87       | 0.93       | 0.81       | 0.91       | 0.80       | 0.81       | 0.83       |



|    |      |      |      |      |      |      |      |      |      |
|----|------|------|------|------|------|------|------|------|------|
| 1  |      |      |      |      |      |      |      |      |      |
| 2  | 0.48 | 0.38 | 0.69 | 0.62 | 0.47 | 0.62 | 0.40 | 0.47 | 0.54 |
| 3  | 0.87 | 0.66 | 0.78 | 0.71 | 0.73 | 0.76 | 0.73 | 0.76 | 0.72 |
| 4  | 0.97 | 0.95 | 0.96 | 0.94 | 0.95 | 0.93 | 0.93 | 0.92 | 0.96 |
| 5  | 0.96 | 0.95 | 0.93 | 0.95 | 0.96 | 0.97 | 0.90 | 0.94 | 0.94 |
| 6  | 0.91 | 0.92 | 0.97 | 0.88 | 0.83 | 0.91 | 0.89 | 0.89 | 0.94 |
| 7  | 0.90 | 0.79 | 0.86 | 0.85 | 0.77 | 0.89 | 0.72 | 0.86 | 0.90 |
| 8  | 0.59 | 0.65 | 0.59 | 0.67 | 0.66 | 0.73 | 0.74 | 0.78 | 0.71 |
| 9  | 0.69 | 0.74 | 0.63 | 0.77 | 0.69 | 0.77 | 0.61 | 0.69 | 0.76 |
| 10 | 0.69 | 0.74 | 0.63 | 0.77 | 0.69 | 0.77 | 0.61 | 0.69 | 0.76 |
| 11 | 0.22 | 0.16 | 0.22 | 0.12 | 0.30 | 0.22 | 0.17 | 0.19 | 0.27 |
| 12 |      |      |      |      |      |      |      |      |      |
| 13 |      |      |      |      |      |      |      |      |      |
| 14 |      |      |      |      |      |      |      |      |      |
| 15 |      |      |      |      |      |      |      |      |      |
| 16 |      |      |      |      |      |      |      |      |      |
| 17 |      |      |      |      |      |      |      |      |      |
| 18 |      |      |      |      |      |      |      |      |      |
| 19 |      |      |      |      |      |      |      |      |      |
| 20 |      |      |      |      |      |      |      |      |      |
| 21 |      |      |      |      |      |      |      |      |      |
| 22 |      |      |      |      |      |      |      |      |      |
| 23 |      |      |      |      |      |      |      |      |      |
| 24 |      |      |      |      |      |      |      |      |      |
| 25 |      |      |      |      |      |      |      |      |      |
| 26 |      |      |      |      |      |      |      |      |      |
| 27 |      |      |      |      |      |      |      |      |      |
| 28 |      |      |      |      |      |      |      |      |      |
| 29 |      |      |      |      |      |      |      |      |      |
| 30 |      |      |      |      |      |      |      |      |      |
| 31 |      |      |      |      |      |      |      |      |      |
| 32 |      |      |      |      |      |      |      |      |      |
| 33 |      |      |      |      |      |      |      |      |      |
| 34 |      |      |      |      |      |      |      |      |      |
| 35 |      |      |      |      |      |      |      |      |      |
| 36 |      |      |      |      |      |      |      |      |      |
| 37 |      |      |      |      |      |      |      |      |      |
| 38 |      |      |      |      |      |      |      |      |      |
| 39 |      |      |      |      |      |      |      |      |      |
| 40 |      |      |      |      |      |      |      |      |      |
| 41 |      |      |      |      |      |      |      |      |      |
| 42 |      |      |      |      |      |      |      |      |      |
| 43 |      |      |      |      |      |      |      |      |      |
| 44 |      |      |      |      |      |      |      |      |      |
| 45 |      |      |      |      |      |      |      |      |      |
| 46 |      |      |      |      |      |      |      |      |      |
| 47 |      |      |      |      |      |      |      |      |      |
| 48 |      |      |      |      |      |      |      |      |      |
| 49 |      |      |      |      |      |      |      |      |      |
| 50 |      |      |      |      |      |      |      |      |      |
| 51 |      |      |      |      |      |      |      |      |      |
| 52 |      |      |      |      |      |      |      |      |      |
| 53 |      |      |      |      |      |      |      |      |      |
| 54 |      |      |      |      |      |      |      |      |      |
| 55 |      |      |      |      |      |      |      |      |      |
| 56 |      |      |      |      |      |      |      |      |      |
| 57 |      |      |      |      |      |      |      |      |      |
| 58 |      |      |      |      |      |      |      |      |      |
| 59 |      |      |      |      |      |      |      |      |      |
| 60 |      |      |      |      |      |      |      |      |      |

For peer review only

1  
2  
3  
4  
5  
6  
7  
8  
9  
10  
11  
12  
13  
14  
15  
16  
17  
18  
19  
20  
21  
22  
23  
24  
25  
26  
27  
28  
29  
30  
31  
32  
33  
34  
35  
36  
37  
38  
39  
40  
41  
42  
43  
44  
45  
46  
47  
48  
49  
50  
51  
52  
53  
54  
55  
56  
57  
58  
59  
60

| <b>RW3</b> | <b>RJC</b> | <b>RAE</b> | <b>RBL</b> | <b>RGR</b> | <b>RQ6</b> | <b>R1K</b> | <b>RN7</b> | <b>RHW</b> |
|------------|------------|------------|------------|------------|------------|------------|------------|------------|
| 0.68       | 0.78       | 0.70       | 0.75       | 0.74       | 0.71       | 0.73       | 0.76       | 0.75       |
| 0.60       | 0.59       | 0.54       | 0.60       | 0.57       | 0.63       | 0.58       | 0.62       | 0.58       |
| 0.51       | 0.56       | 0.39       | 0.56       | 0.55       | 0.58       | 0.51       | 0.47       | 0.46       |
| 0.74       | 0.54       | 0.57       | 0.44       | 0.57       | 0.67       | 0.68       | 0.67       | 0.49       |
| 0.75       | 0.84       | 0.75       | 0.80       | 0.84       | 0.86       | 0.75       | 0.80       | 0.81       |
| 0.74       | 0.77       | 0.69       | 0.74       | 0.72       | 0.76       | 0.68       | 0.80       | 0.78       |
| 0.59       | 0.54       | 0.49       | 0.57       | 0.53       | 0.59       | 0.54       | 0.60       | 0.56       |
| 0.86       | 0.85       | 0.82       | 0.84       | 0.83       | 0.86       | 0.86       | 0.86       | 0.81       |
| 0.68       | 0.80       | 0.78       | 0.80       | 0.83       | 0.70       | 0.70       | 0.76       | 0.82       |
| 0.84       | 0.84       | 0.82       | 0.83       | 0.86       | 0.86       | 0.78       | 0.87       | 0.82       |
| 0.77       | 0.82       | 0.65       | 0.74       | 0.75       | 0.78       | 0.71       | 0.75       | 0.71       |
| 0.88       | 0.83       | 0.89       | 0.84       | 0.86       | 0.85       | 0.86       | 0.92       | 0.84       |
| 0.81       | 0.83       | 0.74       | 0.83       | 0.81       | 0.85       | 0.76       | 0.81       | 0.75       |
| 0.67       | 0.67       | 0.60       | 0.66       | 0.65       | 0.69       | 0.64       | 0.75       | 0.64       |
| 0.87       | 0.87       | 0.78       | 0.86       | 0.87       | 0.88       | 0.86       | 0.80       | 0.88       |
| 0.84       | 0.93       | 0.83       | 0.90       | 0.92       | 0.89       | 0.88       | 0.89       | 0.92       |
| 0.81       | 0.81       | 0.71       | 0.77       | 0.80       | 0.80       | 0.70       | 0.85       | 0.78       |
| 0.76       | 0.71       | 0.61       | 0.59       | 0.68       | 0.73       | 0.64       | 0.75       | 0.61       |
| 0.68       | 0.78       | 0.69       | 0.77       | 0.79       | 0.79       | 0.76       | 0.71       | 0.74       |
| 0.73       | 0.76       | 0.69       | 0.74       | 0.76       | 0.72       | 0.72       | 0.80       | 0.75       |
| 0.59       | 0.76       | 0.54       | 0.62       | 0.70       | 0.63       | 0.59       | 0.63       | 0.64       |
| 0.71       | 0.74       | 0.59       | 0.68       | 0.68       | 0.72       | 0.69       | 0.75       | 0.66       |
| 0.98       | 0.96       | 0.94       | 0.97       | 0.94       | 0.97       | 0.94       | 0.96       | 0.97       |
| 0.82       | 0.86       | 0.78       | 0.88       | 0.90       | 0.92       | 0.85       | 0.86       | 0.81       |
| 0.88       | 0.89       | 0.89       | 0.86       | 0.85       | 0.87       | 0.85       | 0.87       | 0.86       |
| 0.36       | 0.37       | 0.33       | 0.31       | 0.35       | 0.36       | 0.39       | 0.40       | 0.29       |
| 0.58       | 0.66       | 0.57       | 0.66       | 0.70       | 0.68       | 0.60       | 0.67       | 0.54       |
| 0.84       | 0.93       | 0.78       | 0.82       | 0.90       | 0.90       | 0.84       | 0.85       | 0.89       |
| 0.89       | 0.88       | 0.81       | 0.80       | 0.84       | 0.86       | 0.79       | 0.90       | 0.86       |
| 0.82       | 0.88       | 0.76       | 0.84       | 0.81       | 0.85       | 0.81       | 0.87       | 0.82       |
| 0.80       | 0.83       | 0.81       | 0.87       | 0.90       | 0.91       | 0.80       | 0.88       | 0.90       |
| 0.84       | 0.85       | 0.85       | 0.85       | 0.85       | 0.83       | 0.80       | 0.81       | 0.82       |
| 0.94       | 0.97       | 0.92       | 0.94       | 0.94       | 0.95       | 0.90       | 0.95       | 0.89       |
| 0.76       | 0.85       | 0.75       | 0.86       | 0.87       | 0.85       | 0.75       | 0.83       | 0.84       |
| 0.90       | 0.94       | 0.83       | 0.90       | 0.90       | 0.90       | 0.86       | 0.89       | 0.88       |
| 0.82       | 0.86       | 0.80       | 0.72       | 0.77       | 0.81       | 0.81       | 0.89       | 0.78       |
| 0.52       | 0.51       | 0.45       | 0.52       | 0.36       | 0.52       | 0.45       | 0.48       | 0.45       |
| 0.91       | 0.92       | 0.93       | 0.93       | 0.94       | 0.96       | 0.93       | 0.95       | 0.96       |
| 0.60       | 0.70       | 0.59       | 0.73       | 0.73       | 0.76       | 0.70       | 0.65       | 0.71       |
| 0.53       | 0.62       | 0.50       | 0.58       | 0.41       | 0.62       | 0.53       | 0.62       | 0.58       |
| 0.89       | 0.94       | 0.86       | 0.90       | 0.92       | 0.95       | 0.87       | 0.92       | 0.85       |
| 0.87       | 0.96       | 0.86       | 0.89       | 0.87       | 0.88       | 0.86       | 0.88       | 0.84       |

|    |      |      |      |      |      |      |      |      |      |
|----|------|------|------|------|------|------|------|------|------|
| 1  |      |      |      |      |      |      |      |      |      |
| 2  | 0.65 | 0.72 | 0.52 | 0.48 | 0.55 | 0.52 | 0.52 | 0.60 | 0.49 |
| 3  | 0.77 | 0.71 | 0.81 | 0.85 | 0.68 | 0.72 | 0.71 | 0.77 | 0.76 |
| 4  | 0.94 | 0.96 | 0.94 | 0.95 | 0.96 | 0.98 | 0.96 | 0.95 | 0.94 |
| 5  | 0.96 | 0.97 | 0.94 | 0.95 | 0.98 | 0.97 | 0.96 | 0.92 | 0.95 |
| 6  | 0.93 | 0.88 | 0.83 | 0.90 | 0.86 | 0.91 | 0.89 | 0.91 | 0.95 |
| 7  | 0.82 | 0.91 | 0.81 | 0.85 | 0.81 | 0.85 | 0.79 | 0.85 | 0.82 |
| 8  | 0.69 | 0.76 | 0.68 | 0.71 | 0.67 | 0.74 | 0.53 | 0.62 | 0.63 |
| 9  | 0.70 | 0.88 | 0.63 | 0.77 | 0.64 | 0.72 | 0.62 | 0.75 | 0.67 |
| 10 | 0.70 | 0.88 | 0.63 | 0.77 | 0.64 | 0.72 | 0.62 | 0.75 | 0.67 |
| 11 | 0.32 | 0.24 | 0.27 | 0.21 | 0.26 | 0.37 | 0.26 | 0.25 | 0.16 |
| 12 |      |      |      |      |      |      |      |      |      |
| 13 |      |      |      |      |      |      |      |      |      |
| 14 |      |      |      |      |      |      |      |      |      |
| 15 |      |      |      |      |      |      |      |      |      |
| 16 |      |      |      |      |      |      |      |      |      |
| 17 |      |      |      |      |      |      |      |      |      |
| 18 |      |      |      |      |      |      |      |      |      |
| 19 |      |      |      |      |      |      |      |      |      |
| 20 |      |      |      |      |      |      |      |      |      |
| 21 |      |      |      |      |      |      |      |      |      |
| 22 |      |      |      |      |      |      |      |      |      |
| 23 |      |      |      |      |      |      |      |      |      |
| 24 |      |      |      |      |      |      |      |      |      |
| 25 |      |      |      |      |      |      |      |      |      |
| 26 |      |      |      |      |      |      |      |      |      |
| 27 |      |      |      |      |      |      |      |      |      |
| 28 |      |      |      |      |      |      |      |      |      |
| 29 |      |      |      |      |      |      |      |      |      |
| 30 |      |      |      |      |      |      |      |      |      |
| 31 |      |      |      |      |      |      |      |      |      |
| 32 |      |      |      |      |      |      |      |      |      |
| 33 |      |      |      |      |      |      |      |      |      |
| 34 |      |      |      |      |      |      |      |      |      |
| 35 |      |      |      |      |      |      |      |      |      |
| 36 |      |      |      |      |      |      |      |      |      |
| 37 |      |      |      |      |      |      |      |      |      |
| 38 |      |      |      |      |      |      |      |      |      |
| 39 |      |      |      |      |      |      |      |      |      |
| 40 |      |      |      |      |      |      |      |      |      |
| 41 |      |      |      |      |      |      |      |      |      |
| 42 |      |      |      |      |      |      |      |      |      |
| 43 |      |      |      |      |      |      |      |      |      |
| 44 |      |      |      |      |      |      |      |      |      |
| 45 |      |      |      |      |      |      |      |      |      |
| 46 |      |      |      |      |      |      |      |      |      |
| 47 |      |      |      |      |      |      |      |      |      |
| 48 |      |      |      |      |      |      |      |      |      |
| 49 |      |      |      |      |      |      |      |      |      |
| 50 |      |      |      |      |      |      |      |      |      |
| 51 |      |      |      |      |      |      |      |      |      |
| 52 |      |      |      |      |      |      |      |      |      |
| 53 |      |      |      |      |      |      |      |      |      |
| 54 |      |      |      |      |      |      |      |      |      |
| 55 |      |      |      |      |      |      |      |      |      |
| 56 |      |      |      |      |      |      |      |      |      |
| 57 |      |      |      |      |      |      |      |      |      |
| 58 |      |      |      |      |      |      |      |      |      |
| 59 |      |      |      |      |      |      |      |      |      |
| 60 |      |      |      |      |      |      |      |      |      |

For peer review only

1  
2  
3  
4  
5  
6  
7  
8  
9  
10  
11  
12  
13  
14  
15  
16  
17  
18  
19  
20  
21  
22  
23  
24  
25  
26  
27  
28  
29  
30  
31  
32  
33  
34  
35  
36  
37  
38  
39  
40  
41  
42  
43  
44  
45  
46  
47  
48  
49  
50  
51  
52  
53  
54  
55  
56  
57  
58  
59  
60

| <b>RNL</b> | <b>RCX</b> | <b>RPA</b> | <b>RWH</b> | <b>RM2</b> | <b>RR7</b> | <b>RNS</b> | <b>RN3</b> | <b>RGN</b> |
|------------|------------|------------|------------|------------|------------|------------|------------|------------|
| 0.72       | 0.77       | 0.73       | 0.72       | 0.80       | 0.75       | 0.70       | 0.75       | 0.77       |
| 0.53       | 0.59       | 0.52       | 0.55       | 0.60       | 0.60       | 0.60       | 0.56       | 0.58       |
| 0.53       | 0.50       | 0.44       | 0.50       | 0.54       | 0.65       | 0.52       | 0.47       | 0.59       |
| 0.54       | 0.76       | 0.66       | 0.47       | 0.62       | 0.62       | 0.52       | 0.49       | 0.66       |
| 0.74       | 0.83       | 0.75       | 0.77       | 0.86       | 0.84       | 0.74       | 0.80       | 0.83       |
| 0.69       | 0.73       | 0.74       | 0.70       | 0.77       | 0.81       | 0.77       | 0.75       | 0.76       |
| 0.52       | 0.58       | 0.57       | 0.52       | 0.63       | 0.61       | 0.50       | 0.51       | 0.61       |
| 0.85       | 0.89       | 0.83       | 0.81       | 0.86       | 0.89       | 0.83       | 0.86       | 0.86       |
| 0.81       | 0.77       | 0.76       | 0.75       | 0.81       | 0.85       | 0.74       | 0.79       | 0.80       |
| 0.75       | 0.83       | 0.82       | 0.80       | 0.88       | 0.89       | 0.84       | 0.82       | 0.84       |
| 0.72       | 0.78       | 0.71       | 0.73       | 0.77       | 0.79       | 0.67       | 0.68       | 0.73       |
| 0.79       | 0.87       | 0.84       | 0.82       | 0.85       | 0.90       | 0.81       | 0.82       | 0.88       |
| 0.76       | 0.80       | 0.79       | 0.75       | 0.84       | 0.85       | 0.77       | 0.81       | 0.81       |
| 0.60       | 0.68       | 0.62       | 0.63       | 0.69       | 0.79       | 0.69       | 0.66       | 0.69       |
| 0.84       | 0.82       | 0.83       | 0.84       | 0.85       | 0.90       | 0.83       | 0.87       | 0.92       |
| 0.89       | 0.85       | 0.80       | 0.89       | 0.88       | 0.93       | 0.86       | 0.88       | 0.90       |
| 0.74       | 0.81       | 0.75       | 0.75       | 0.81       | 0.84       | 0.79       | 0.80       | 0.81       |
| 0.61       | 0.70       | 0.69       | 0.58       | 0.67       | 0.74       | 0.66       | 0.61       | 0.68       |
| 0.83       | 0.73       | 0.69       | 0.74       | 0.71       | 0.84       | 0.72       | 0.70       | 0.80       |
| 0.69       | 0.77       | 0.77       | 0.69       | 0.72       | 0.75       | 0.77       | 0.80       | 0.78       |
| 0.67       | 0.71       | 0.57       | 0.61       | 0.61       | 0.60       | 0.60       | 0.64       | 0.67       |
| 0.67       | 0.73       | 0.66       | 0.65       | 0.73       | 0.80       | 0.73       | 0.69       | 0.69       |
| 0.94       | 0.94       | 0.97       | 0.96       | 0.98       | 0.98       | 0.92       | 0.97       | 0.97       |
| 0.80       | 0.83       | 0.81       | 0.87       | 0.90       | 0.90       | 0.83       | 0.84       | 0.84       |
| 0.86       | 0.89       | 0.85       | 0.83       | 0.90       | 0.93       | 0.84       | 0.86       | 0.89       |
| 0.34       | 0.35       | 0.27       | 0.28       | 0.32       | 0.46       | 0.29       | 0.31       | 0.44       |
| 0.55       | 0.68       | 0.58       | 0.55       | 0.63       | 0.69       | 0.58       | 0.59       | 0.66       |
| 0.89       | 0.83       | 0.83       | 0.80       | 0.87       | 0.88       | 0.85       | 0.79       | 0.83       |
| 0.76       | 0.85       | 0.84       | 0.81       | 0.86       | 0.89       | 0.85       | 0.84       | 0.84       |
| 0.76       | 0.83       | 0.80       | 0.82       | 0.80       | 0.87       | 0.81       | 0.80       | 0.83       |
| 0.83       | 0.86       | 0.84       | 0.79       | 0.85       | 0.91       | 0.79       | 0.85       | 0.90       |
| 0.85       | 0.85       | 0.82       | 0.81       | 0.89       | 0.92       | 0.82       | 0.80       | 0.85       |
| 0.94       | 0.94       | 0.91       | 0.91       | 0.95       | 0.98       | 0.92       | 0.94       | 0.96       |
| 0.88       | 0.82       | 0.78       | 0.80       | 0.85       | 0.86       | 0.76       | 0.84       | 0.80       |
| 0.87       | 0.90       | 0.86       | 0.87       | 0.88       | 0.92       | 0.89       | 0.90       | 0.92       |
| 0.79       | 0.85       | 0.88       | 0.84       | 0.72       | 0.84       | 0.85       | 0.75       | 0.93       |
| 0.41       | 0.42       | 0.43       | 0.44       | 0.45       | 0.56       | 0.45       | 0.36       | 0.52       |
| 0.93       | 0.93       | 0.92       | 0.91       | 0.93       | 0.97       | 0.94       | 0.95       | 0.96       |
| 0.65       | 0.68       | 0.61       | 0.69       | 0.62       | 0.79       | 0.65       | 0.51       | 0.69       |
| 0.48       | 0.49       | 0.53       | 0.47       | 0.47       | 0.64       | 0.57       | 0.47       | 0.57       |
| 0.79       | 0.88       | 0.90       | 0.86       | 0.89       | 0.93       | 0.87       | 0.88       | 0.92       |
| 0.84       | 0.90       | 0.86       | 0.84       | 0.89       | 0.92       | 0.86       | 0.82       | 0.87       |

|    |      |      |      |      |      |      |      |      |      |
|----|------|------|------|------|------|------|------|------|------|
| 1  |      |      |      |      |      |      |      |      |      |
| 2  | 0.50 | 0.56 | 0.65 | 0.59 | 0.56 | 0.64 | 0.66 | 0.63 | 0.67 |
| 3  | 0.76 | 0.76 | 0.69 | 0.69 | 0.76 | 0.83 | 0.80 | 0.76 | 0.75 |
| 4  | 0.96 | 0.93 | 0.96 | 0.96 | 0.93 | 0.97 | 0.94 | 0.97 | 0.98 |
| 5  | 0.91 | 0.96 | 0.96 | 0.94 | 0.97 | 0.96 | 0.93 | 0.96 | 0.96 |
| 6  | 0.85 | 0.87 | 0.90 | 0.87 | 0.92 | 0.95 | 0.93 | 0.90 | 0.91 |
| 7  | 0.77 | 0.84 | 0.82 | 0.88 | 0.86 | 0.84 | 0.81 | 0.88 | 0.88 |
| 8  | 0.79 | 0.73 | 0.51 | 0.59 | 0.62 | 0.71 | 0.68 | 0.73 | 0.74 |
| 9  | 0.70 | 0.73 | 0.65 | 0.49 | 0.67 | 0.78 | 0.68 | 0.60 | 0.67 |
| 10 | 0.70 | 0.73 | 0.65 | 0.49 | 0.67 | 0.78 | 0.68 | 0.60 | 0.67 |
| 11 | 0.16 | 0.26 | 0.22 | 0.23 | 0.34 | 0.19 | 0.23 | 0.34 | 0.23 |
| 12 |      |      |      |      |      |      |      |      |      |
| 13 |      |      |      |      |      |      |      |      |      |
| 14 |      |      |      |      |      |      |      |      |      |
| 15 |      |      |      |      |      |      |      |      |      |
| 16 |      |      |      |      |      |      |      |      |      |
| 17 |      |      |      |      |      |      |      |      |      |
| 18 |      |      |      |      |      |      |      |      |      |
| 19 |      |      |      |      |      |      |      |      |      |
| 20 |      |      |      |      |      |      |      |      |      |
| 21 |      |      |      |      |      |      |      |      |      |
| 22 |      |      |      |      |      |      |      |      |      |
| 23 |      |      |      |      |      |      |      |      |      |
| 24 |      |      |      |      |      |      |      |      |      |
| 25 |      |      |      |      |      |      |      |      |      |
| 26 |      |      |      |      |      |      |      |      |      |
| 27 |      |      |      |      |      |      |      |      |      |
| 28 |      |      |      |      |      |      |      |      |      |
| 29 |      |      |      |      |      |      |      |      |      |
| 30 |      |      |      |      |      |      |      |      |      |
| 31 |      |      |      |      |      |      |      |      |      |
| 32 |      |      |      |      |      |      |      |      |      |
| 33 |      |      |      |      |      |      |      |      |      |
| 34 |      |      |      |      |      |      |      |      |      |
| 35 |      |      |      |      |      |      |      |      |      |
| 36 |      |      |      |      |      |      |      |      |      |
| 37 |      |      |      |      |      |      |      |      |      |
| 38 |      |      |      |      |      |      |      |      |      |
| 39 |      |      |      |      |      |      |      |      |      |
| 40 |      |      |      |      |      |      |      |      |      |
| 41 |      |      |      |      |      |      |      |      |      |
| 42 |      |      |      |      |      |      |      |      |      |
| 43 |      |      |      |      |      |      |      |      |      |
| 44 |      |      |      |      |      |      |      |      |      |
| 45 |      |      |      |      |      |      |      |      |      |
| 46 |      |      |      |      |      |      |      |      |      |
| 47 |      |      |      |      |      |      |      |      |      |
| 48 |      |      |      |      |      |      |      |      |      |
| 49 |      |      |      |      |      |      |      |      |      |
| 50 |      |      |      |      |      |      |      |      |      |
| 51 |      |      |      |      |      |      |      |      |      |
| 52 |      |      |      |      |      |      |      |      |      |
| 53 |      |      |      |      |      |      |      |      |      |
| 54 |      |      |      |      |      |      |      |      |      |
| 55 |      |      |      |      |      |      |      |      |      |
| 56 |      |      |      |      |      |      |      |      |      |
| 57 |      |      |      |      |      |      |      |      |      |
| 58 |      |      |      |      |      |      |      |      |      |
| 59 |      |      |      |      |      |      |      |      |      |
| 60 |      |      |      |      |      |      |      |      |      |

For peer review only

1  
2  
3  
4  
5  
6  
7  
8  
9  
10  
11  
12  
13  
14  
15  
16  
17  
18  
19  
20  
21  
22  
23  
24  
25  
26  
27  
28  
29  
30  
31  
32  
33  
34  
35  
36  
37  
38  
39  
40  
41  
42  
43  
44  
45  
46  
47  
48  
49  
50  
51  
52  
53  
54  
55  
56  
57  
58  
59  
60

| <b>RVW</b> | <b>RNZ</b> | <b>RDE</b> | <b>RLN</b> | <b>RWY</b> | <b>RGQ</b> | <b>RXP</b> | <b>RXH</b> | <b>RXK</b> |
|------------|------------|------------|------------|------------|------------|------------|------------|------------|
| 0.77       | 0.76       | 0.76       | 0.73       | 0.74       | 0.69       | 0.73       | 0.77       | 0.75       |
| 0.65       | 0.63       | 0.62       | 0.61       | 0.57       | 0.62       | 0.59       | 0.60       | 0.57       |
| 0.55       | 0.58       | 0.53       | 0.58       | 0.49       | 0.55       | 0.55       | 0.55       | 0.47       |
| 0.72       | 0.61       | 0.69       | 0.59       | 0.59       | 0.65       | 0.64       | 0.69       | 0.59       |
| 0.82       | 0.82       | 0.80       | 0.80       | 0.75       | 0.78       | 0.78       | 0.79       | 0.75       |
| 0.80       | 0.72       | 0.78       | 0.76       | 0.75       | 0.69       | 0.71       | 0.71       | 0.74       |
| 0.63       | 0.54       | 0.62       | 0.58       | 0.51       | 0.52       | 0.54       | 0.53       | 0.55       |
| 0.88       | 0.83       | 0.86       | 0.85       | 0.84       | 0.82       | 0.82       | 0.85       | 0.90       |
| 0.77       | 0.79       | 0.79       | 0.72       | 0.79       | 0.78       | 0.79       | 0.80       | 0.75       |
| 0.88       | 0.86       | 0.83       | 0.83       | 0.83       | 0.83       | 0.81       | 0.82       | 0.85       |
| 0.80       | 0.80       | 0.72       | 0.76       | 0.72       | 0.77       | 0.71       | 0.73       | 0.67       |
| 0.91       | 0.87       | 0.91       | 0.82       | 0.90       | 0.91       | 0.77       | 0.93       | 0.90       |
| 0.83       | 0.84       | 0.80       | 0.78       | 0.78       | 0.83       | 0.80       | 0.80       | 0.80       |
| 0.74       | 0.68       | 0.72       | 0.74       | 0.66       | 0.67       | 0.65       | 0.63       | 0.66       |
| 0.87       | 0.87       | 0.89       | 0.83       | 0.84       | 0.88       | 0.85       | 0.86       | 0.86       |
| 0.87       | 0.89       | 0.89       | 0.89       | 0.89       | 0.90       | 0.87       | 0.88       | 0.84       |
| 0.85       | 0.81       | 0.81       | 0.78       | 0.77       | 0.78       | 0.74       | 0.78       | 0.77       |
| 0.73       | 0.76       | 0.70       | 0.77       | 0.68       | 0.69       | 0.69       | 0.74       | 0.71       |
| 0.76       | 0.78       | 0.72       | 0.77       | 0.75       | 0.74       | 0.72       | 0.75       | 0.70       |
| 0.76       | 0.74       | 0.80       | 0.71       | 0.75       | 0.70       | 0.71       | 0.73       | 0.79       |
| 0.59       | 0.67       | 0.57       | 0.63       | 0.64       | 0.65       | 0.65       | 0.67       | 0.55       |
| 0.80       | 0.78       | 0.76       | 0.75       | 0.73       | 0.78       | 0.74       | 0.69       | 0.70       |
| 0.97       | 0.97       | 0.96       | 0.94       | 0.96       | 0.97       | 0.95       | 0.97       | 0.96       |
| 0.84       | 0.89       | 0.81       | 0.88       | 0.82       | 0.86       | 0.77       | 0.86       | 0.81       |
| 0.91       | 0.93       | 0.87       | 0.90       | 0.89       | 0.87       | 0.88       | 0.82       | 0.88       |
| 0.37       | 0.36       | 0.37       | 0.39       | 0.38       | 0.36       | 0.33       | 0.35       | 0.39       |
| 0.71       | 0.65       | 0.64       | 0.68       | 0.64       | 0.64       | 0.61       | 0.63       | 0.58       |
| 0.84       | 0.81       | 0.82       | 0.81       | 0.87       | 0.85       | 0.85       | 0.85       | 0.76       |
| 0.90       | 0.88       | 0.86       | 0.85       | 0.83       | 0.80       | 0.84       | 0.89       | 0.86       |
| 0.87       | 0.80       | 0.83       | 0.79       | 0.77       | 0.85       | 0.78       | 0.79       | 0.84       |
| 0.85       | 0.89       | 0.90       | 0.86       | 0.86       | 0.87       | 0.85       | 0.86       | 0.83       |
| 0.88       | 0.87       | 0.82       | 0.85       | 0.84       | 0.84       | 0.84       | 0.81       | 0.84       |
| 0.95       | 0.96       | 0.94       | 0.93       | 0.95       | 0.96       | 0.94       | 0.93       | 0.94       |
| 0.86       | 0.88       | 0.83       | 0.79       | 0.87       | 0.89       | 0.77       | 0.80       | 0.77       |
| 0.92       | 0.92       | 0.92       | 0.89       | 0.85       | 0.91       | 0.88       | 0.89       | 0.87       |
| 0.82       | 0.86       | 0.81       | 0.79       | 0.84       | 0.85       | 0.79       | 0.82       | 0.86       |
| 0.50       | 0.50       | 0.49       | 0.53       | 0.51       | 0.56       | 0.49       | 0.53       | 0.39       |
| 0.93       | 0.97       | 0.95       | 0.92       | 0.96       | 0.95       | 0.94       | 0.94       | 0.93       |
| 0.67       | 0.70       | 0.64       | 0.70       | 0.66       | 0.65       | 0.57       | 0.74       | 0.66       |
| 0.59       | 0.57       | 0.49       | 0.56       | 0.56       | 0.58       | 0.58       | 0.49       | 0.49       |
| 0.93       | 0.92       | 0.90       | 0.92       | 0.93       | 0.90       | 0.90       | 0.88       | 0.91       |
| 0.94       | 0.88       | 0.88       | 0.89       | 0.85       | 0.82       | 0.90       | 0.82       | 0.88       |

|    |      |      |      |      |      |      |      |      |      |
|----|------|------|------|------|------|------|------|------|------|
| 1  |      |      |      |      |      |      |      |      |      |
| 2  | 0.63 | 0.63 | 0.57 | 0.56 | 0.48 | 0.65 | 0.53 | 0.52 | 0.62 |
| 3  | 0.87 | 0.71 | 0.77 | 0.79 | 0.74 | 0.72 | 0.72 | 0.88 | 0.87 |
| 4  | 0.96 | 0.95 | 0.97 | 0.97 | 0.96 | 0.97 | 0.97 | 0.96 | 0.94 |
| 5  | 0.98 | 0.97 | 0.95 | 0.97 | 0.96 | 0.97 | 0.96 | 0.95 | 0.93 |
| 6  | 0.91 | 0.88 | 0.94 | 0.91 | 0.86 | 0.93 | 0.91 | 0.84 | 0.92 |
| 7  | 0.84 | 0.82 | 0.89 | 0.80 | 0.75 | 0.88 | 0.77 | 0.85 | 0.79 |
| 8  | 0.67 | 0.72 | 0.60 | 0.70 | 0.65 | 0.73 | 0.74 | 0.73 | 0.69 |
| 9  | 0.81 | 0.79 | 0.72 | 0.78 | 0.74 | 0.71 | 0.76 | 0.65 | 0.61 |
| 10 | 0.81 | 0.79 | 0.72 | 0.78 | 0.74 | 0.71 | 0.76 | 0.65 | 0.61 |
| 11 | 0.22 | 0.23 | 0.34 | 0.24 | 0.33 | 0.23 | 0.21 | 0.26 | 0.33 |
| 12 |      |      |      |      |      |      |      |      |      |
| 13 |      |      |      |      |      |      |      |      |      |
| 14 |      |      |      |      |      |      |      |      |      |
| 15 |      |      |      |      |      |      |      |      |      |
| 16 |      |      |      |      |      |      |      |      |      |
| 17 |      |      |      |      |      |      |      |      |      |
| 18 |      |      |      |      |      |      |      |      |      |
| 19 |      |      |      |      |      |      |      |      |      |
| 20 |      |      |      |      |      |      |      |      |      |
| 21 |      |      |      |      |      |      |      |      |      |
| 22 |      |      |      |      |      |      |      |      |      |
| 23 |      |      |      |      |      |      |      |      |      |
| 24 |      |      |      |      |      |      |      |      |      |
| 25 |      |      |      |      |      |      |      |      |      |
| 26 |      |      |      |      |      |      |      |      |      |
| 27 |      |      |      |      |      |      |      |      |      |
| 28 |      |      |      |      |      |      |      |      |      |
| 29 |      |      |      |      |      |      |      |      |      |
| 30 |      |      |      |      |      |      |      |      |      |
| 31 |      |      |      |      |      |      |      |      |      |
| 32 |      |      |      |      |      |      |      |      |      |
| 33 |      |      |      |      |      |      |      |      |      |
| 34 |      |      |      |      |      |      |      |      |      |
| 35 |      |      |      |      |      |      |      |      |      |
| 36 |      |      |      |      |      |      |      |      |      |
| 37 |      |      |      |      |      |      |      |      |      |
| 38 |      |      |      |      |      |      |      |      |      |
| 39 |      |      |      |      |      |      |      |      |      |
| 40 |      |      |      |      |      |      |      |      |      |
| 41 |      |      |      |      |      |      |      |      |      |
| 42 |      |      |      |      |      |      |      |      |      |
| 43 |      |      |      |      |      |      |      |      |      |
| 44 |      |      |      |      |      |      |      |      |      |
| 45 |      |      |      |      |      |      |      |      |      |
| 46 |      |      |      |      |      |      |      |      |      |
| 47 |      |      |      |      |      |      |      |      |      |
| 48 |      |      |      |      |      |      |      |      |      |
| 49 |      |      |      |      |      |      |      |      |      |
| 50 |      |      |      |      |      |      |      |      |      |
| 51 |      |      |      |      |      |      |      |      |      |
| 52 |      |      |      |      |      |      |      |      |      |
| 53 |      |      |      |      |      |      |      |      |      |
| 54 |      |      |      |      |      |      |      |      |      |
| 55 |      |      |      |      |      |      |      |      |      |
| 56 |      |      |      |      |      |      |      |      |      |
| 57 |      |      |      |      |      |      |      |      |      |
| 58 |      |      |      |      |      |      |      |      |      |
| 59 |      |      |      |      |      |      |      |      |      |
| 60 |      |      |      |      |      |      |      |      |      |

For peer review only

1  
2  
3  
4  
5  
6  
7  
8  
9  
10  
11  
12  
13  
14  
15  
16  
17  
18  
19  
20  
21  
22  
23  
24  
25  
26  
27  
28  
29  
30  
31  
32  
33  
34  
35  
36  
37  
38  
39  
40  
41  
42  
43  
44  
45  
46  
47  
48  
49  
50  
51  
52  
53  
54  
55  
56  
57  
58  
59  
60

| <b>RD1</b> | <b>RJL</b> | <b>RXF</b> | <b>RQ8</b> | <b>RXQ</b> | <b>RTF</b> | <b>RD3</b> | <b>RW6</b> | <b>RNA</b> |
|------------|------------|------------|------------|------------|------------|------------|------------|------------|
| 0.70       | 0.72       | 0.74       | 0.72       | 0.77       | 0.75       | 0.70       | 0.69       | 0.74       |
| 0.59       | 0.53       | 0.56       | 0.63       | 0.55       | 0.65       | 0.62       | 0.51       | 0.59       |
| 0.48       | 0.52       | 0.55       | 0.54       | 0.51       | 0.49       | 0.55       | 0.53       | 0.52       |
| 0.64       | 0.63       | 0.63       | 0.72       | 0.69       | 0.57       | 0.60       | 0.52       | 0.60       |
| 0.78       | 0.82       | 0.77       | 0.84       | 0.77       | 0.79       | 0.81       | 0.73       | 0.80       |
| 0.75       | 0.72       | 0.78       | 0.75       | 0.72       | 0.81       | 0.70       | 0.69       | 0.76       |
| 0.55       | 0.52       | 0.55       | 0.53       | 0.55       | 0.62       | 0.51       | 0.54       | 0.55       |
| 0.84       | 0.80       | 0.82       | 0.83       | 0.85       | 0.88       | 0.85       | 0.85       | 0.86       |
| 0.77       | 0.76       | 0.77       | 0.81       | 0.76       | 0.81       | 0.78       | 0.74       | 0.75       |
| 0.84       | 0.81       | 0.83       | 0.84       | 0.83       | 0.87       | 0.82       | 0.82       | 0.84       |
| 0.74       | 0.72       | 0.75       | 0.72       | 0.71       | 0.77       | 0.77       | 0.73       | 0.73       |
| 0.89       | 0.91       | 0.88       | 0.89       | 0.83       | 0.91       | 0.85       | 0.90       | 0.91       |
| 0.81       | 0.77       | 0.81       | 0.79       | 0.82       | 0.84       | 0.78       | 0.78       | 0.80       |
| 0.65       | 0.69       | 0.72       | 0.70       | 0.63       | 0.77       | 0.70       | 0.63       | 0.66       |
| 0.88       | 0.87       | 0.89       | 0.86       | 0.84       | 0.87       | 0.89       | 0.84       | 0.84       |
| 0.90       | 0.90       | 0.87       | 0.91       | 0.90       | 0.88       | 0.90       | 0.86       | 0.88       |
| 0.81       | 0.76       | 0.78       | 0.79       | 0.78       | 0.81       | 0.78       | 0.74       | 0.77       |
| 0.71       | 0.69       | 0.73       | 0.75       | 0.69       | 0.79       | 0.65       | 0.67       | 0.67       |
| 0.75       | 0.80       | 0.71       | 0.73       | 0.80       | 0.78       | 0.76       | 0.69       | 0.77       |
| 0.77       | 0.68       | 0.74       | 0.76       | 0.73       | 0.74       | 0.70       | 0.73       | 0.74       |
| 0.67       | 0.58       | 0.58       | 0.58       | 0.65       | 0.66       | 0.66       | 0.57       | 0.56       |
| 0.71       | 0.68       | 0.76       | 0.74       | 0.70       | 0.81       | 0.73       | 0.65       | 0.67       |
| 0.95       | 0.95       | 0.94       | 0.98       | 0.94       | 0.93       | 0.96       | 0.95       | 0.98       |
| 0.85       | 0.86       | 0.83       | 0.85       | 0.84       | 0.87       | 0.88       | 0.82       | 0.84       |
| 0.90       | 0.85       | 0.88       | 0.87       | 0.87       | 0.91       | 0.91       | 0.88       | 0.84       |
| 0.34       | 0.35       | 0.38       | 0.33       | 0.30       | 0.38       | 0.36       | 0.35       | 0.35       |
| 0.63       | 0.62       | 0.64       | 0.62       | 0.61       | 0.67       | 0.65       | 0.57       | 0.62       |
| 0.83       | 0.88       | 0.83       | 0.89       | 0.84       | 0.84       | 0.87       | 0.80       | 0.85       |
| 0.82       | 0.85       | 0.87       | 0.87       | 0.86       | 0.89       | 0.82       | 0.84       | 0.87       |
| 0.80       | 0.81       | 0.80       | 0.84       | 0.81       | 0.83       | 0.81       | 0.78       | 0.82       |
| 0.84       | 0.81       | 0.81       | 0.88       | 0.86       | 0.83       | 0.88       | 0.76       | 0.89       |
| 0.87       | 0.84       | 0.86       | 0.85       | 0.87       | 0.86       | 0.84       | 0.86       | 0.85       |
| 0.95       | 0.94       | 0.95       | 0.93       | 0.95       | 0.97       | 0.96       | 0.91       | 0.94       |
| 0.84       | 0.80       | 0.83       | 0.80       | 0.86       | 0.88       | 0.89       | 0.80       | 0.83       |
| 0.92       | 0.89       | 0.89       | 0.90       | 0.87       | 0.92       | 0.93       | 0.83       | 0.89       |
| 0.85       | 0.74       | 0.83       | 0.79       | 0.78       | 0.82       | 0.76       | 0.78       | 0.78       |
| 0.40       | 0.42       | 0.43       | 0.47       | 0.33       | 0.57       | 0.52       | 0.40       | 0.39       |
| 0.92       | 0.95       | 0.94       | 0.93       | 0.94       | 0.90       | 0.95       | 0.90       | 0.94       |
| 0.61       | 0.66       | 0.56       | 0.72       | 0.74       | 0.68       | 0.71       | 0.63       | 0.59       |
| 0.46       | 0.50       | 0.52       | 0.53       | 0.44       | 0.63       | 0.65       | 0.48       | 0.45       |
| 0.93       | 0.84       | 0.91       | 0.89       | 0.91       | 0.91       | 0.92       | 0.86       | 0.88       |
| 0.90       | 0.90       | 0.90       | 0.86       | 0.80       | 0.91       | 0.91       | 0.82       | 0.84       |



|    |      |      |      |      |      |      |      |      |      |
|----|------|------|------|------|------|------|------|------|------|
| 1  |      |      |      |      |      |      |      |      |      |
| 2  | 0.59 | 0.51 | 0.55 | 0.62 | 0.60 | 0.65 | 0.58 | 0.57 | 0.59 |
| 3  | 0.74 | 0.67 | 0.78 | 0.72 | 0.75 | 0.73 | 0.74 | 0.73 | 0.82 |
| 4  | 0.97 | 0.94 | 0.95 | 0.97 | 0.95 | 0.98 | 0.95 | 0.94 | 0.94 |
| 5  | 0.97 | 0.95 | 0.97 | 0.97 | 0.96 | 0.97 | 0.97 | 0.94 | 0.93 |
| 6  | 0.90 | 0.88 | 0.84 | 0.91 | 0.90 | 0.92 | 0.94 | 0.88 | 0.86 |
| 7  | 0.85 | 0.78 | 0.82 | 0.81 | 0.87 | 0.82 | 0.84 | 0.80 | 0.87 |
| 8  | 0.74 | 0.68 | 0.70 | 0.66 | 0.66 | 0.69 | 0.73 | 0.70 | 0.53 |
| 9  | 0.67 | 0.68 | 0.72 | 0.67 | 0.74 | 0.84 | 0.79 | 0.63 | 0.46 |
| 10 | 0.67 | 0.68 | 0.72 | 0.67 | 0.74 | 0.84 | 0.79 | 0.63 | 0.46 |
| 11 | 0.28 | 0.22 | 0.31 | 0.20 | 0.27 | 0.19 | 0.23 | 0.18 | 0.23 |
| 12 |      |      |      |      |      |      |      |      |      |
| 13 |      |      |      |      |      |      |      |      |      |
| 14 |      |      |      |      |      |      |      |      |      |
| 15 |      |      |      |      |      |      |      |      |      |
| 16 |      |      |      |      |      |      |      |      |      |
| 17 |      |      |      |      |      |      |      |      |      |
| 18 |      |      |      |      |      |      |      |      |      |
| 19 |      |      |      |      |      |      |      |      |      |
| 20 |      |      |      |      |      |      |      |      |      |
| 21 |      |      |      |      |      |      |      |      |      |
| 22 |      |      |      |      |      |      |      |      |      |
| 23 |      |      |      |      |      |      |      |      |      |
| 24 |      |      |      |      |      |      |      |      |      |
| 25 |      |      |      |      |      |      |      |      |      |
| 26 |      |      |      |      |      |      |      |      |      |
| 27 |      |      |      |      |      |      |      |      |      |
| 28 |      |      |      |      |      |      |      |      |      |
| 29 |      |      |      |      |      |      |      |      |      |
| 30 |      |      |      |      |      |      |      |      |      |
| 31 |      |      |      |      |      |      |      |      |      |
| 32 |      |      |      |      |      |      |      |      |      |
| 33 |      |      |      |      |      |      |      |      |      |
| 34 |      |      |      |      |      |      |      |      |      |
| 35 |      |      |      |      |      |      |      |      |      |
| 36 |      |      |      |      |      |      |      |      |      |
| 37 |      |      |      |      |      |      |      |      |      |
| 38 |      |      |      |      |      |      |      |      |      |
| 39 |      |      |      |      |      |      |      |      |      |
| 40 |      |      |      |      |      |      |      |      |      |
| 41 |      |      |      |      |      |      |      |      |      |
| 42 |      |      |      |      |      |      |      |      |      |
| 43 |      |      |      |      |      |      |      |      |      |
| 44 |      |      |      |      |      |      |      |      |      |
| 45 |      |      |      |      |      |      |      |      |      |
| 46 |      |      |      |      |      |      |      |      |      |
| 47 |      |      |      |      |      |      |      |      |      |
| 48 |      |      |      |      |      |      |      |      |      |
| 49 |      |      |      |      |      |      |      |      |      |
| 50 |      |      |      |      |      |      |      |      |      |
| 51 |      |      |      |      |      |      |      |      |      |
| 52 |      |      |      |      |      |      |      |      |      |
| 53 |      |      |      |      |      |      |      |      |      |
| 54 |      |      |      |      |      |      |      |      |      |
| 55 |      |      |      |      |      |      |      |      |      |
| 56 |      |      |      |      |      |      |      |      |      |
| 57 |      |      |      |      |      |      |      |      |      |
| 58 |      |      |      |      |      |      |      |      |      |
| 59 |      |      |      |      |      |      |      |      |      |
| 60 |      |      |      |      |      |      |      |      |      |

For peer review only

1  
2  
3  
4  
5  
6  
7  
8  
9  
10  
11  
12  
13  
14  
15  
16  
17  
18  
19  
20  
21  
22  
23  
24  
25  
26  
27  
28  
29  
30  
31  
32  
33  
34  
35  
36  
37  
38  
39  
40  
41  
42  
43  
44  
45  
46  
47  
48  
49  
50  
51  
52  
53  
54  
55  
56  
57  
58  
59  
60

|  | <b>RA9</b> | <b>RA2</b> | <b>RTX</b> | <b>RXC</b> | <b>RXL</b> | <b>RBA</b> | <b>RAJ</b> | <b>RRK</b> | <b>RHU</b> |
|--|------------|------------|------------|------------|------------|------------|------------|------------|------------|
|  | 0.80       | 0.74       | 0.74       | 0.73       | 0.76       | 0.76       | 0.75       | 0.70       | 0.73       |
|  | 0.66       | 0.58       | 0.62       | 0.55       | 0.56       | 0.62       | 0.61       | 0.57       | 0.60       |
|  | 0.61       | 0.49       | 0.54       | 0.52       | 0.52       | 0.58       | 0.56       | 0.51       | 0.48       |
|  | 0.65       | 0.66       | 0.66       | 0.62       | 0.54       | 0.67       | 0.59       | 0.63       | 0.55       |
|  | 0.81       | 0.80       | 0.84       | 0.82       | 0.81       | 0.82       | 0.78       | 0.78       | 0.83       |
|  | 0.77       | 0.73       | 0.76       | 0.71       | 0.73       | 0.77       | 0.72       | 0.73       | 0.74       |
|  | 0.63       | 0.55       | 0.57       | 0.51       | 0.52       | 0.58       | 0.57       | 0.60       | 0.58       |
|  | 0.88       | 0.87       | 0.86       | 0.84       | 0.84       | 0.85       | 0.86       | 0.85       | 0.87       |
|  | 0.78       | 0.77       | 0.78       | 0.76       | 0.77       | 0.77       | 0.83       | 0.72       | 0.76       |
|  | 0.85       | 0.83       | 0.86       | 0.82       | 0.82       | 0.84       | 0.84       | 0.84       | 0.84       |
|  | 0.82       | 0.71       | 0.77       | 0.77       | 0.74       | 0.82       | 0.72       | 0.73       | 0.73       |
|  | 0.87       | 0.87       | 0.88       | 0.79       | 0.83       | 0.88       | 0.85       | 0.90       | 0.86       |
|  | 0.84       | 0.77       | 0.82       | 0.77       | 0.78       | 0.84       | 0.80       | 0.80       | 0.81       |
|  | 0.73       | 0.65       | 0.71       | 0.65       | 0.67       | 0.72       | 0.69       | 0.63       | 0.67       |
|  | 0.86       | 0.81       | 0.84       | 0.83       | 0.89       | 0.91       | 0.85       | 0.85       | 0.84       |
|  | 0.88       | 0.88       | 0.89       | 0.88       | 0.89       | 0.94       | 0.86       | 0.88       | 0.89       |
|  | 0.86       | 0.79       | 0.81       | 0.78       | 0.78       | 0.81       | 0.75       | 0.79       | 0.80       |
|  | 0.70       | 0.63       | 0.77       | 0.68       | 0.68       | 0.72       | 0.62       | 0.61       | 0.61       |
|  | 0.78       | 0.71       | 0.79       | 0.73       | 0.74       | 0.81       | 0.73       | 0.71       | 0.75       |
|  | 0.80       | 0.76       | 0.74       | 0.73       | 0.73       | 0.81       | 0.76       | 0.75       | 0.72       |
|  | 0.63       | 0.59       | 0.71       | 0.66       | 0.59       | 0.70       | 0.60       | 0.65       | 0.61       |
|  | 0.78       | 0.71       | 0.79       | 0.69       | 0.74       | 0.78       | 0.75       | 0.67       | 0.67       |
|  | 0.95       | 0.96       | 0.96       | 0.98       | 0.96       | 0.96       | 0.95       | 0.95       | 0.95       |
|  | 0.87       | 0.86       | 0.85       | 0.86       | 0.86       | 0.89       | 0.83       | 0.84       | 0.88       |
|  | 0.90       | 0.84       | 0.88       | 0.86       | 0.88       | 0.90       | 0.89       | 0.86       | 0.85       |
|  | 0.34       | 0.30       | 0.40       | 0.28       | 0.41       | 0.40       | 0.29       | 0.36       | 0.30       |
|  | 0.67       | 0.62       | 0.68       | 0.61       | 0.62       | 0.70       | 0.64       | 0.59       | 0.62       |
|  | 0.87       | 0.82       | 0.88       | 0.85       | 0.85       | 0.90       | 0.87       | 0.81       | 0.85       |
|  | 0.90       | 0.84       | 0.88       | 0.87       | 0.86       | 0.89       | 0.83       | 0.84       | 0.83       |
|  | 0.89       | 0.81       | 0.81       | 0.79       | 0.80       | 0.85       | 0.84       | 0.76       | 0.84       |
|  | 0.90       | 0.88       | 0.88       | 0.85       | 0.86       | 0.88       | 0.90       | 0.88       | 0.85       |
|  | 0.85       | 0.79       | 0.83       | 0.81       | 0.85       | 0.87       | 0.85       | 0.81       | 0.82       |
|  | 0.96       | 0.95       | 0.95       | 0.95       | 0.91       | 0.96       | 0.96       | 0.94       | 0.93       |
|  | 0.88       | 0.84       | 0.88       | 0.81       | 0.82       | 0.85       | 0.84       | 0.82       | 0.80       |
|  | 0.89       | 0.92       | 0.91       | 0.84       | 0.90       | 0.91       | 0.91       | 0.86       | 0.89       |
|  | 0.81       | 0.80       | 0.83       | 0.76       | 0.86       | 0.89       | 0.81       | 0.75       | 0.79       |
|  | 0.40       | 0.48       | 0.52       | 0.41       | 0.53       | 0.44       | 0.47       | 0.42       | 0.44       |
|  | 0.96       | 0.94       | 0.91       | 0.95       | 0.93       | 0.95       | 0.97       | 0.95       | 0.95       |
|  | 0.75       | 0.69       | 0.74       | 0.70       | 0.73       | 0.81       | 0.66       | 0.59       | 0.64       |
|  | 0.52       | 0.56       | 0.59       | 0.47       | 0.60       | 0.51       | 0.63       | 0.50       | 0.49       |
|  | 0.93       | 0.88       | 0.90       | 0.88       | 0.91       | 0.93       | 0.91       | 0.91       | 0.90       |
|  | 0.87       | 0.87       | 0.88       | 0.83       | 0.84       | 0.90       | 0.87       | 0.88       | 0.82       |

|    |      |      |      |      |      |      |      |      |      |
|----|------|------|------|------|------|------|------|------|------|
| 1  |      |      |      |      |      |      |      |      |      |
| 2  | 0.75 | 0.38 | 0.65 | 0.51 | 0.61 | 0.60 | 0.57 | 0.57 | 0.51 |
| 3  | 0.81 | 0.75 | 0.81 | 0.71 | 0.76 | 0.77 | 0.74 | 0.80 | 0.80 |
| 4  | 0.94 | 0.95 | 0.97 | 0.97 | 0.96 | 0.98 | 0.98 | 0.94 | 0.94 |
| 5  | 0.97 | 0.94 | 0.95 | 0.96 | 0.98 | 0.98 | 0.93 | 0.96 | 0.96 |
| 6  | 0.92 | 0.90 | 0.90 | 0.93 | 0.95 | 0.92 | 0.89 | 0.90 | 0.91 |
| 7  | 0.92 | 0.82 | 0.85 | 0.75 | 0.83 | 0.88 | 0.92 | 0.76 | 0.89 |
| 8  | 0.68 | 0.67 | 0.73 | 0.78 | 0.53 | 0.73 | 0.55 | 0.64 | 0.63 |
| 9  | 0.77 | 0.65 | 0.74 | 0.67 | 0.71 | 0.86 | 0.70 | 0.64 | 0.66 |
| 10 | 0.77 | 0.65 | 0.74 | 0.67 | 0.71 | 0.86 | 0.70 | 0.64 | 0.66 |
| 11 | 0.20 | 0.25 | 0.30 | 0.22 | 0.21 | 0.26 | 0.24 | 0.39 | 0.24 |
| 12 |      |      |      |      |      |      |      |      |      |
| 13 |      |      |      |      |      |      |      |      |      |
| 14 |      |      |      |      |      |      |      |      |      |
| 15 |      |      |      |      |      |      |      |      |      |
| 16 |      |      |      |      |      |      |      |      |      |
| 17 |      |      |      |      |      |      |      |      |      |
| 18 |      |      |      |      |      |      |      |      |      |
| 19 |      |      |      |      |      |      |      |      |      |
| 20 |      |      |      |      |      |      |      |      |      |
| 21 |      |      |      |      |      |      |      |      |      |
| 22 |      |      |      |      |      |      |      |      |      |
| 23 |      |      |      |      |      |      |      |      |      |
| 24 |      |      |      |      |      |      |      |      |      |
| 25 |      |      |      |      |      |      |      |      |      |
| 26 |      |      |      |      |      |      |      |      |      |
| 27 |      |      |      |      |      |      |      |      |      |
| 28 |      |      |      |      |      |      |      |      |      |
| 29 |      |      |      |      |      |      |      |      |      |
| 30 |      |      |      |      |      |      |      |      |      |
| 31 |      |      |      |      |      |      |      |      |      |
| 32 |      |      |      |      |      |      |      |      |      |
| 33 |      |      |      |      |      |      |      |      |      |
| 34 |      |      |      |      |      |      |      |      |      |
| 35 |      |      |      |      |      |      |      |      |      |
| 36 |      |      |      |      |      |      |      |      |      |
| 37 |      |      |      |      |      |      |      |      |      |
| 38 |      |      |      |      |      |      |      |      |      |
| 39 |      |      |      |      |      |      |      |      |      |
| 40 |      |      |      |      |      |      |      |      |      |
| 41 |      |      |      |      |      |      |      |      |      |
| 42 |      |      |      |      |      |      |      |      |      |
| 43 |      |      |      |      |      |      |      |      |      |
| 44 |      |      |      |      |      |      |      |      |      |
| 45 |      |      |      |      |      |      |      |      |      |
| 46 |      |      |      |      |      |      |      |      |      |
| 47 |      |      |      |      |      |      |      |      |      |
| 48 |      |      |      |      |      |      |      |      |      |
| 49 |      |      |      |      |      |      |      |      |      |
| 50 |      |      |      |      |      |      |      |      |      |
| 51 |      |      |      |      |      |      |      |      |      |
| 52 |      |      |      |      |      |      |      |      |      |
| 53 |      |      |      |      |      |      |      |      |      |
| 54 |      |      |      |      |      |      |      |      |      |
| 55 |      |      |      |      |      |      |      |      |      |
| 56 |      |      |      |      |      |      |      |      |      |
| 57 |      |      |      |      |      |      |      |      |      |
| 58 |      |      |      |      |      |      |      |      |      |
| 59 |      |      |      |      |      |      |      |      |      |
| 60 |      |      |      |      |      |      |      |      |      |

For peer review only

1  
2  
3  
4  
5  
6  
7  
8  
9  
10  
11  
12  
13  
14  
15  
16  
17  
18  
19  
20  
21  
22  
23  
24  
25  
26  
27  
28  
29  
30  
31  
32  
33  
34  
35  
36  
37  
38  
39  
40  
41  
42  
43  
44  
45  
46  
47  
48  
49  
50  
51  
52  
53  
54  
55  
56  
57  
58  
59  
60

| <b>RXR</b> | <b>RJ7</b> | <b>RR1</b> | <b>RYR</b> | <b>RXN</b> | <b>RYJ</b> | <b>RX1</b> | <b>RWD</b> | <b>RL4</b> |
|------------|------------|------------|------------|------------|------------|------------|------------|------------|
| 0.75       | 0.71       | 0.76       | 0.71       | 0.77       | 0.70       | 0.74       | 0.74       | 0.72       |
| 0.53       | 0.56       | 0.55       | 0.56       | 0.60       | 0.55       | 0.54       | 0.48       | 0.57       |
| 0.50       | 0.54       | 0.47       | 0.61       | 0.51       | 0.50       | 0.49       | 0.51       | 0.49       |
| 0.60       | 0.60       | 0.61       | 0.58       | 0.61       | 0.61       | 0.57       | 0.57       | 0.53       |
| 0.77       | 0.79       | 0.78       | 0.83       | 0.77       | 0.74       | 0.78       | 0.76       | 0.81       |
| 0.67       | 0.71       | 0.72       | 0.71       | 0.73       | 0.68       | 0.74       | 0.69       | 0.74       |
| 0.49       | 0.53       | 0.56       | 0.53       | 0.57       | 0.49       | 0.56       | 0.51       | 0.54       |
| 0.85       | 0.84       | 0.87       | 0.87       | 0.87       | 0.82       | 0.85       | 0.83       | 0.86       |
| 0.77       | 0.75       | 0.78       | 0.77       | 0.81       | 0.71       | 0.78       | 0.80       | 0.74       |
| 0.81       | 0.82       | 0.83       | 0.81       | 0.84       | 0.80       | 0.85       | 0.80       | 0.84       |
| 0.69       | 0.75       | 0.71       | 0.77       | 0.74       | 0.70       | 0.71       | 0.67       | 0.71       |
| 0.84       | 0.83       | 0.88       | 0.84       | 0.87       | 0.81       | 0.88       | 0.88       | 0.83       |
| 0.77       | 0.76       | 0.79       | 0.81       | 0.84       | 0.72       | 0.78       | 0.76       | 0.80       |
| 0.62       | 0.62       | 0.64       | 0.66       | 0.69       | 0.61       | 0.64       | 0.61       | 0.64       |
| 0.85       | 0.84       | 0.84       | 0.84       | 0.82       | 0.81       | 0.86       | 0.84       | 0.84       |
| 0.87       | 0.84       | 0.87       | 0.92       | 0.86       | 0.85       | 0.88       | 0.87       | 0.88       |
| 0.76       | 0.75       | 0.76       | 0.77       | 0.79       | 0.71       | 0.78       | 0.74       | 0.76       |
| 0.64       | 0.67       | 0.69       | 0.65       | 0.64       | 0.70       | 0.61       | 0.60       | 0.65       |
| 0.70       | 0.69       | 0.72       | 0.74       | 0.73       | 0.66       | 0.71       | 0.71       | 0.69       |
| 0.68       | 0.73       | 0.76       | 0.76       | 0.80       | 0.66       | 0.77       | 0.71       | 0.76       |
| 0.63       | 0.59       | 0.58       | 0.61       | 0.65       | 0.51       | 0.59       | 0.59       | 0.57       |
| 0.68       | 0.67       | 0.67       | 0.71       | 0.74       | 0.65       | 0.70       | 0.62       | 0.68       |
| 0.96       | 0.95       | 0.96       | 0.95       | 0.96       | 0.93       | 0.97       | 0.96       | 0.97       |
| 0.80       | 0.86       | 0.83       | 0.87       | 0.85       | 0.80       | 0.82       | 0.79       | 0.81       |
| 0.87       | 0.91       | 0.85       | 0.88       | 0.89       | 0.85       | 0.89       | 0.88       | 0.85       |
| 0.41       | 0.29       | 0.32       | 0.25       | 0.35       | 0.31       | 0.37       | 0.30       | 0.30       |
| 0.60       | 0.55       | 0.59       | 0.64       | 0.66       | 0.51       | 0.59       | 0.55       | 0.61       |
| 0.78       | 0.83       | 0.80       | 0.85       | 0.81       | 0.76       | 0.89       | 0.80       | 0.79       |
| 0.80       | 0.82       | 0.88       | 0.83       | 0.84       | 0.78       | 0.85       | 0.76       | 0.83       |
| 0.76       | 0.79       | 0.80       | 0.83       | 0.83       | 0.79       | 0.85       | 0.77       | 0.83       |
| 0.80       | 0.82       | 0.86       | 0.88       | 0.88       | 0.80       | 0.87       | 0.83       | 0.83       |
| 0.82       | 0.82       | 0.84       | 0.84       | 0.87       | 0.77       | 0.84       | 0.84       | 0.79       |
| 0.94       | 0.94       | 0.93       | 0.94       | 0.95       | 0.92       | 0.94       | 0.93       | 0.95       |
| 0.80       | 0.81       | 0.81       | 0.86       | 0.81       | 0.76       | 0.82       | 0.80       | 0.77       |
| 0.86       | 0.84       | 0.87       | 0.86       | 0.88       | 0.83       | 0.87       | 0.87       | 0.89       |
| 0.81       | 0.84       | 0.79       | 0.85       | 0.84       | 0.79       | 0.79       | 0.80       | 0.87       |
| 0.54       | 0.35       | 0.42       | 0.39       | 0.52       | 0.35       | 0.41       | 0.37       | 0.41       |
| 0.91       | 0.93       | 0.90       | 0.94       | 0.94       | 0.89       | 0.94       | 0.93       | 0.93       |
| 0.59       | 0.68       | 0.66       | 0.72       | 0.65       | 0.64       | 0.64       | 0.60       | 0.56       |
| 0.67       | 0.41       | 0.55       | 0.43       | 0.62       | 0.39       | 0.48       | 0.42       | 0.47       |
| 0.91       | 0.84       | 0.88       | 0.89       | 0.90       | 0.82       | 0.89       | 0.82       | 0.91       |
| 0.87       | 0.83       | 0.86       | 0.82       | 0.88       | 0.80       | 0.86       | 0.87       | 0.86       |

|    |      |      |      |      |      |      |      |      |      |
|----|------|------|------|------|------|------|------|------|------|
| 1  |      |      |      |      |      |      |      |      |      |
| 2  | 0.53 | 0.51 | 0.56 | 0.53 | 0.56 | 0.56 | 0.51 | 0.50 | 0.59 |
| 3  | 0.85 | 0.73 | 0.89 | 0.77 | 0.86 | 0.68 | 0.80 | 0.77 | 0.85 |
| 4  | 0.94 | 0.93 | 0.96 | 0.96 | 0.94 | 0.90 | 0.95 | 0.94 | 0.96 |
| 5  | 0.95 | 0.95 | 0.95 | 0.95 | 0.96 | 0.93 | 0.96 | 0.92 | 0.94 |
| 6  | 0.93 | 0.89 | 0.89 | 0.90 | 0.92 | 0.94 | 0.93 | 0.86 | 0.89 |
| 7  | 0.80 | 0.81 | 0.82 | 0.83 | 0.87 | 0.85 | 0.90 | 0.78 | 0.82 |
| 8  | 0.67 | 0.55 | 0.62 | 0.77 | 0.69 | 0.59 | 0.73 | 0.65 | 0.59 |
| 9  | 0.69 | 0.55 | 0.66 | 0.69 | 0.73 | 0.60 | 0.63 | 0.67 | 0.58 |
| 10 | 0.69 | 0.55 | 0.66 | 0.69 | 0.73 | 0.60 | 0.63 | 0.67 | 0.58 |
| 11 | 0.20 | 0.31 | 0.19 | 0.29 | 0.16 | 0.50 | 0.35 | 0.30 | 0.22 |
| 12 |      |      |      |      |      |      |      |      |      |
| 13 |      |      |      |      |      |      |      |      |      |
| 14 |      |      |      |      |      |      |      |      |      |
| 15 |      |      |      |      |      |      |      |      |      |
| 16 |      |      |      |      |      |      |      |      |      |
| 17 |      |      |      |      |      |      |      |      |      |
| 18 |      |      |      |      |      |      |      |      |      |
| 19 |      |      |      |      |      |      |      |      |      |
| 20 |      |      |      |      |      |      |      |      |      |
| 21 |      |      |      |      |      |      |      |      |      |
| 22 |      |      |      |      |      |      |      |      |      |
| 23 |      |      |      |      |      |      |      |      |      |
| 24 |      |      |      |      |      |      |      |      |      |
| 25 |      |      |      |      |      |      |      |      |      |
| 26 |      |      |      |      |      |      |      |      |      |
| 27 |      |      |      |      |      |      |      |      |      |
| 28 |      |      |      |      |      |      |      |      |      |
| 29 |      |      |      |      |      |      |      |      |      |
| 30 |      |      |      |      |      |      |      |      |      |
| 31 |      |      |      |      |      |      |      |      |      |
| 32 |      |      |      |      |      |      |      |      |      |
| 33 |      |      |      |      |      |      |      |      |      |
| 34 |      |      |      |      |      |      |      |      |      |
| 35 |      |      |      |      |      |      |      |      |      |
| 36 |      |      |      |      |      |      |      |      |      |
| 37 |      |      |      |      |      |      |      |      |      |
| 38 |      |      |      |      |      |      |      |      |      |
| 39 |      |      |      |      |      |      |      |      |      |
| 40 |      |      |      |      |      |      |      |      |      |
| 41 |      |      |      |      |      |      |      |      |      |
| 42 |      |      |      |      |      |      |      |      |      |
| 43 |      |      |      |      |      |      |      |      |      |
| 44 |      |      |      |      |      |      |      |      |      |
| 45 |      |      |      |      |      |      |      |      |      |
| 46 |      |      |      |      |      |      |      |      |      |
| 47 |      |      |      |      |      |      |      |      |      |
| 48 |      |      |      |      |      |      |      |      |      |
| 49 |      |      |      |      |      |      |      |      |      |
| 50 |      |      |      |      |      |      |      |      |      |
| 51 |      |      |      |      |      |      |      |      |      |
| 52 |      |      |      |      |      |      |      |      |      |
| 53 |      |      |      |      |      |      |      |      |      |
| 54 |      |      |      |      |      |      |      |      |      |
| 55 |      |      |      |      |      |      |      |      |      |
| 56 |      |      |      |      |      |      |      |      |      |
| 57 |      |      |      |      |      |      |      |      |      |
| 58 |      |      |      |      |      |      |      |      |      |
| 59 |      |      |      |      |      |      |      |      |      |
| 60 |      |      |      |      |      |      |      |      |      |

For peer review only

1  
2  
3  
4  
5  
6  
7  
8  
9  
10  
11  
12  
13  
14  
15  
16  
17  
18  
19  
20  
21  
22  
23  
24  
25  
26  
27  
28  
29  
30  
31  
32  
33  
34  
35  
36  
37  
38  
39  
40  
41  
42  
43  
44  
45  
46  
47  
48  
49  
50  
51  
52  
53  
54  
55  
56  
57  
58  
59  
60

| <b>RN5</b> | <b>RDU</b> | <b>RBV</b> | <b>RA7</b> | <b>REF</b> | <b>RAL</b> | <b>RKB</b> | <b>RTR</b> | <b>RJZ</b> |
|------------|------------|------------|------------|------------|------------|------------|------------|------------|
| 0.70       | 0.72       | 0.72       | 0.72       | 0.77       | 0.70       | 0.71       | 0.72       | 0.69       |
| 0.56       | 0.58       | 0.60       | 0.55       | 0.60       | 0.52       | 0.58       | 0.60       | 0.52       |
| 0.56       | 0.53       | 0.58       | 0.50       | 0.50       | 0.46       | 0.48       | 0.55       | 0.53       |
| 0.46       | 0.61       | 0.62       | 0.62       | 0.59       | 0.58       | 0.62       | 0.58       | 0.58       |
| 0.82       | 0.80       | 0.77       | 0.79       | 0.82       | 0.73       | 0.79       | 0.79       | 0.76       |
| 0.71       | 0.71       | 0.74       | 0.74       | 0.75       | 0.66       | 0.74       | 0.74       | 0.71       |
| 0.48       | 0.51       | 0.55       | 0.50       | 0.55       | 0.47       | 0.58       | 0.53       | 0.49       |
| 0.83       | 0.84       | 0.81       | 0.82       | 0.85       | 0.79       | 0.83       | 0.83       | 0.81       |
| 0.73       | 0.78       | 0.74       | 0.78       | 0.76       | 0.73       | 0.75       | 0.74       | 0.74       |
| 0.81       | 0.82       | 0.84       | 0.81       | 0.84       | 0.76       | 0.85       | 0.84       | 0.79       |
| 0.75       | 0.76       | 0.74       | 0.71       | 0.70       | 0.70       | 0.69       | 0.73       | 0.66       |
| 0.81       | 0.82       | 0.86       | 0.85       | 0.87       | 0.84       | 0.86       | 0.89       | 0.82       |
| 0.78       | 0.78       | 0.79       | 0.78       | 0.84       | 0.73       | 0.80       | 0.78       | 0.77       |
| 0.63       | 0.64       | 0.63       | 0.64       | 0.68       | 0.60       | 0.68       | 0.68       | 0.61       |
| 0.89       | 0.85       | 0.82       | 0.83       | 0.83       | 0.85       | 0.78       | 0.88       | 0.82       |
| 0.90       | 0.90       | 0.90       | 0.89       | 0.87       | 0.88       | 0.86       | 0.90       | 0.85       |
| 0.76       | 0.79       | 0.79       | 0.78       | 0.79       | 0.72       | 0.77       | 0.78       | 0.74       |
| 0.67       | 0.66       | 0.70       | 0.65       | 0.68       | 0.64       | 0.65       | 0.66       | 0.69       |
| 0.76       | 0.77       | 0.82       | 0.74       | 0.77       | 0.71       | 0.68       | 0.77       | 0.68       |
| 0.71       | 0.72       | 0.70       | 0.68       | 0.79       | 0.68       | 0.71       | 0.70       | 0.68       |
| 0.61       | 0.62       | 0.56       | 0.59       | 0.64       | 0.57       | 0.56       | 0.66       | 0.56       |
| 0.74       | 0.69       | 0.70       | 0.68       | 0.73       | 0.62       | 0.69       | 0.73       | 0.69       |
| 0.96       | 0.94       | 0.96       | 0.95       | 0.95       | 0.94       | 0.97       | 0.96       | 0.94       |
| 0.89       | 0.84       | 0.88       | 0.83       | 0.85       | 0.84       | 0.82       | 0.84       | 0.78       |
| 0.86       | 0.89       | 0.87       | 0.88       | 0.86       | 0.88       | 0.88       | 0.86       | 0.87       |
| 0.25       | 0.28       | 0.29       | 0.30       | 0.33       | 0.29       | 0.34       | 0.32       | 0.29       |
| 0.61       | 0.63       | 0.57       | 0.57       | 0.67       | 0.52       | 0.60       | 0.65       | 0.51       |
| 0.89       | 0.86       | 0.87       | 0.87       | 0.87       | 0.83       | 0.81       | 0.82       | 0.80       |
| 0.81       | 0.81       | 0.85       | 0.82       | 0.78       | 0.80       | 0.88       | 0.84       | 0.85       |
| 0.81       | 0.79       | 0.84       | 0.86       | 0.80       | 0.73       | 0.86       | 0.80       | 0.79       |
| 0.85       | 0.84       | 0.89       | 0.86       | 0.88       | 0.85       | 0.87       | 0.82       | 0.85       |
| 0.83       | 0.85       | 0.80       | 0.82       | 0.85       | 0.78       | 0.83       | 0.83       | 0.82       |
| 0.93       | 0.94       | 0.96       | 0.95       | 0.97       | 0.92       | 0.94       | 0.94       | 0.95       |
| 0.88       | 0.83       | 0.84       | 0.80       | 0.85       | 0.76       | 0.82       | 0.83       | 0.77       |
| 0.92       | 0.89       | 0.88       | 0.85       | 0.91       | 0.86       | 0.89       | 0.91       | 0.86       |
| 0.80       | 0.74       | 0.79       | 0.81       | 0.79       | 0.74       | 0.83       | 0.78       | 0.81       |
| 0.37       | 0.46       | 0.56       | 0.33       | 0.45       | 0.39       | 0.41       | 0.47       | 0.37       |
| 0.94       | 0.95       | 0.97       | 0.95       | 0.96       | 0.92       | 0.95       | 0.93       | 0.92       |
| 0.73       | 0.70       | 0.73       | 0.69       | 0.66       | 0.69       | 0.63       | 0.67       | 0.64       |
| 0.46       | 0.61       | 0.59       | 0.42       | 0.56       | 0.42       | 0.50       | 0.56       | 0.46       |
| 0.88       | 0.88       | 0.89       | 0.87       | 0.89       | 0.87       | 0.90       | 0.90       | 0.86       |
| 0.90       | 0.86       | 0.85       | 0.84       | 0.92       | 0.84       | 0.90       | 0.91       | 0.84       |

|    |      |      |      |      |      |      |      |      |      |
|----|------|------|------|------|------|------|------|------|------|
| 1  |      |      |      |      |      |      |      |      |      |
| 2  | 0.51 | 0.50 | 0.57 | 0.59 | 0.60 | 0.50 | 0.59 | 0.50 | 0.48 |
| 3  | 0.69 | 0.69 | 0.70 | 0.75 | 0.79 | 0.68 | 0.74 | 0.78 | 0.76 |
| 4  | 0.94 | 0.96 | 0.94 | 0.95 | 0.96 | 0.93 | 0.94 | 0.97 | 0.93 |
| 5  | 0.95 | 0.95 | 0.96 | 0.95 | 0.97 | 0.96 | 0.96 | 0.96 | 0.93 |
| 6  | 0.91 | 0.90 | 0.88 | 0.94 | 0.92 | 0.89 | 0.92 | 0.90 | 0.89 |
| 7  | 0.79 | 0.83 | 0.85 | 0.88 | 0.82 | 0.80 | 0.86 | 0.83 | 0.83 |
| 8  | 0.73 | 0.63 | 0.64 | 0.65 | 0.79 | 0.55 | 0.55 | 0.75 | 0.60 |
| 9  | 0.66 | 0.66 | 0.61 | 0.67 | 0.68 | 0.65 | 0.68 | 0.72 | 0.56 |
| 10 | 0.66 | 0.66 | 0.61 | 0.67 | 0.68 | 0.65 | 0.68 | 0.72 | 0.56 |
| 11 | 0.23 | 0.16 | 0.36 | 0.35 | 0.33 | 0.31 | 0.33 | 0.25 | 0.33 |
| 12 |      |      |      |      |      |      |      |      |      |
| 13 |      |      |      |      |      |      |      |      |      |
| 14 |      |      |      |      |      |      |      |      |      |
| 15 |      |      |      |      |      |      |      |      |      |
| 16 |      |      |      |      |      |      |      |      |      |
| 17 |      |      |      |      |      |      |      |      |      |
| 18 |      |      |      |      |      |      |      |      |      |
| 19 |      |      |      |      |      |      |      |      |      |
| 20 |      |      |      |      |      |      |      |      |      |
| 21 |      |      |      |      |      |      |      |      |      |
| 22 |      |      |      |      |      |      |      |      |      |
| 23 |      |      |      |      |      |      |      |      |      |
| 24 |      |      |      |      |      |      |      |      |      |
| 25 |      |      |      |      |      |      |      |      |      |
| 26 |      |      |      |      |      |      |      |      |      |
| 27 |      |      |      |      |      |      |      |      |      |
| 28 |      |      |      |      |      |      |      |      |      |
| 29 |      |      |      |      |      |      |      |      |      |
| 30 |      |      |      |      |      |      |      |      |      |
| 31 |      |      |      |      |      |      |      |      |      |
| 32 |      |      |      |      |      |      |      |      |      |
| 33 |      |      |      |      |      |      |      |      |      |
| 34 |      |      |      |      |      |      |      |      |      |
| 35 |      |      |      |      |      |      |      |      |      |
| 36 |      |      |      |      |      |      |      |      |      |
| 37 |      |      |      |      |      |      |      |      |      |
| 38 |      |      |      |      |      |      |      |      |      |
| 39 |      |      |      |      |      |      |      |      |      |
| 40 |      |      |      |      |      |      |      |      |      |
| 41 |      |      |      |      |      |      |      |      |      |
| 42 |      |      |      |      |      |      |      |      |      |
| 43 |      |      |      |      |      |      |      |      |      |
| 44 |      |      |      |      |      |      |      |      |      |
| 45 |      |      |      |      |      |      |      |      |      |
| 46 |      |      |      |      |      |      |      |      |      |
| 47 |      |      |      |      |      |      |      |      |      |
| 48 |      |      |      |      |      |      |      |      |      |
| 49 |      |      |      |      |      |      |      |      |      |
| 50 |      |      |      |      |      |      |      |      |      |
| 51 |      |      |      |      |      |      |      |      |      |
| 52 |      |      |      |      |      |      |      |      |      |
| 53 |      |      |      |      |      |      |      |      |      |
| 54 |      |      |      |      |      |      |      |      |      |
| 55 |      |      |      |      |      |      |      |      |      |
| 56 |      |      |      |      |      |      |      |      |      |
| 57 |      |      |      |      |      |      |      |      |      |
| 58 |      |      |      |      |      |      |      |      |      |
| 59 |      |      |      |      |      |      |      |      |      |
| 60 |      |      |      |      |      |      |      |      |      |

For peer review only

1  
2  
3  
4  
5  
6  
7  
8  
9  
10  
11  
12  
13  
14  
15  
16  
17  
18  
19  
20  
21  
22  
23  
24  
25  
26  
27  
28  
29  
30  
31  
32  
33  
34  
35  
36  
37  
38  
39  
40  
41  
42  
43  
44  
45  
46  
47  
48  
49  
50  
51  
52  
53  
54  
55  
56  
57  
58  
59  
60

| <b>RHM</b> | <b>RTG</b> | <b>R1H</b> | <b>RK9</b> | <b>RXW</b> | <b>RR8</b> | <b>RWP</b> | <b>RWF</b> | <b>RJE</b> |
|------------|------------|------------|------------|------------|------------|------------|------------|------------|
| 0.72       | 0.73       | 0.68       | 0.75       | 0.72       | 0.73       | 0.73       | 0.74       | 0.74       |
| 0.55       | 0.62       | 0.52       | 0.59       | 0.55       | 0.61       | 0.58       | 0.58       | 0.59       |
| 0.47       | 0.53       | 0.48       | 0.46       | 0.51       | 0.50       | 0.48       | 0.58       | 0.50       |
| 0.61       | 0.59       | 0.61       | 0.57       | 0.52       | 0.60       | 0.58       | 0.59       | 0.53       |
| 0.73       | 0.78       | 0.72       | 0.75       | 0.75       | 0.81       | 0.80       | 0.80       | 0.79       |
| 0.70       | 0.72       | 0.69       | 0.73       | 0.69       | 0.75       | 0.71       | 0.76       | 0.73       |
| 0.53       | 0.56       | 0.51       | 0.55       | 0.52       | 0.57       | 0.52       | 0.58       | 0.56       |
| 0.84       | 0.87       | 0.79       | 0.85       | 0.85       | 0.85       | 0.84       | 0.84       | 0.86       |
| 0.77       | 0.77       | 0.71       | 0.75       | 0.76       | 0.78       | 0.74       | 0.79       | 0.76       |
| 0.82       | 0.83       | 0.75       | 0.83       | 0.81       | 0.87       | 0.81       | 0.83       | 0.83       |
| 0.69       | 0.71       | 0.71       | 0.70       | 0.67       | 0.77       | 0.71       | 0.70       | 0.68       |
| 0.84       | 0.85       | 0.87       | 0.89       | 0.79       | 0.88       | 0.89       | 0.89       | 0.87       |
| 0.79       | 0.79       | 0.72       | 0.80       | 0.77       | 0.81       | 0.77       | 0.81       | 0.78       |
| 0.62       | 0.67       | 0.59       | 0.68       | 0.63       | 0.67       | 0.63       | 0.67       | 0.67       |
| 0.84       | 0.88       | 0.82       | 0.82       | 0.81       | 0.87       | 0.87       | 0.84       | 0.86       |
| 0.88       | 0.88       | 0.84       | 0.84       | 0.86       | 0.87       | 0.86       | 0.91       | 0.87       |
| 0.78       | 0.77       | 0.70       | 0.78       | 0.77       | 0.81       | 0.79       | 0.80       | 0.76       |
| 0.64       | 0.69       | 0.66       | 0.65       | 0.63       | 0.66       | 0.70       | 0.64       | 0.63       |
| 0.72       | 0.75       | 0.66       | 0.71       | 0.75       | 0.73       | 0.73       | 0.77       | 0.75       |
| 0.68       | 0.75       | 0.63       | 0.74       | 0.69       | 0.71       | 0.70       | 0.73       | 0.75       |
| 0.57       | 0.64       | 0.55       | 0.67       | 0.62       | 0.60       | 0.68       | 0.65       | 0.58       |
| 0.68       | 0.71       | 0.61       | 0.70       | 0.72       | 0.69       | 0.70       | 0.72       | 0.70       |
| 0.94       | 0.97       | 0.94       | 0.97       | 0.97       | 0.97       | 0.95       | 0.96       | 0.95       |
| 0.87       | 0.82       | 0.79       | 0.83       | 0.80       | 0.86       | 0.84       | 0.83       | 0.83       |
| 0.84       | 0.90       | 0.81       | 0.85       | 0.86       | 0.87       | 0.84       | 0.90       | 0.89       |
| 0.25       | 0.36       | 0.32       | 0.29       | 0.34       | 0.45       | 0.35       | 0.34       | 0.46       |
| 0.56       | 0.62       | 0.51       | 0.61       | 0.58       | 0.61       | 0.64       | 0.66       | 0.58       |
| 0.84       | 0.84       | 0.78       | 0.85       | 0.85       | 0.85       | 0.82       | 0.87       | 0.81       |
| 0.83       | 0.83       | 0.79       | 0.85       | 0.82       | 0.83       | 0.83       | 0.82       | 0.83       |
| 0.78       | 0.84       | 0.73       | 0.85       | 0.81       | 0.87       | 0.77       | 0.80       | 0.79       |
| 0.85       | 0.89       | 0.78       | 0.80       | 0.86       | 0.90       | 0.86       | 0.85       | 0.81       |
| 0.82       | 0.86       | 0.76       | 0.85       | 0.82       | 0.84       | 0.81       | 0.85       | 0.84       |
| 0.95       | 0.96       | 0.92       | 0.95       | 0.95       | 0.94       | 0.95       | 0.95       | 0.94       |
| 0.83       | 0.83       | 0.74       | 0.83       | 0.81       | 0.84       | 0.75       | 0.82       | 0.82       |
| 0.87       | 0.87       | 0.79       | 0.90       | 0.87       | 0.88       | 0.90       | 0.90       | 0.87       |
| 0.76       | 0.77       | 0.79       | 0.76       | 0.83       | 0.77       | 0.88       | 0.82       | 0.84       |
| 0.40       | 0.50       | 0.34       | 0.44       | 0.39       | 0.57       | 0.47       | 0.48       | 0.43       |
| 0.95       | 0.95       | 0.91       | 0.93       | 0.94       | 0.96       | 0.94       | 0.93       | 0.93       |
| 0.64       | 0.70       | 0.60       | 0.59       | 0.65       | 0.62       | 0.64       | 0.76       | 0.61       |
| 0.45       | 0.58       | 0.36       | 0.49       | 0.45       | 0.59       | 0.62       | 0.51       | 0.56       |
| 0.86       | 0.92       | 0.84       | 0.87       | 0.88       | 0.91       | 0.91       | 0.90       | 0.89       |
| 0.85       | 0.87       | 0.80       | 0.85       | 0.82       | 0.85       | 0.84       | 0.89       | 0.86       |



|    |      |      |      |      |      |      |      |      |      |
|----|------|------|------|------|------|------|------|------|------|
| 1  |      |      |      |      |      |      |      |      |      |
| 2  | 0.41 | 0.56 | 0.48 | 0.56 | 0.57 | 0.61 | 0.49 | 0.61 | 0.58 |
| 3  | 0.70 | 0.78 | 0.72 | 0.87 | 0.81 | 0.69 | 0.82 | 0.71 | 0.80 |
| 4  | 0.92 | 0.97 | 0.95 | 0.94 | 0.96 | 0.96 | 0.95 | 0.96 | 0.95 |
| 5  | 0.95 | 0.96 | 0.94 | 0.96 | 0.94 | 0.97 | 0.98 | 0.95 | 0.95 |
| 6  | 0.90 | 0.91 | 0.91 | 0.91 | 0.91 | 0.94 | 0.84 | 0.87 | 0.92 |
| 7  | 0.81 | 0.84 | 0.75 | 0.89 | 0.86 | 0.90 | 0.79 | 0.86 | 0.83 |
| 8  | 0.69 | 0.77 | 0.55 | 0.64 | 0.69 | 0.73 | 0.74 | 0.62 | 0.66 |
| 9  | 0.60 | 0.72 | 0.49 | 0.67 | 0.69 | 0.70 | 0.70 | 0.70 | 0.68 |
| 10 | 0.60 | 0.72 | 0.49 | 0.67 | 0.69 | 0.70 | 0.70 | 0.70 | 0.68 |
| 11 | 0.41 | 0.25 | 0.35 | 0.27 | 0.23 | 0.45 | 0.32 | 0.25 | 0.21 |
| 12 |      |      |      |      |      |      |      |      |      |
| 13 |      |      |      |      |      |      |      |      |      |
| 14 |      |      |      |      |      |      |      |      |      |
| 15 |      |      |      |      |      |      |      |      |      |
| 16 |      |      |      |      |      |      |      |      |      |
| 17 |      |      |      |      |      |      |      |      |      |
| 18 |      |      |      |      |      |      |      |      |      |
| 19 |      |      |      |      |      |      |      |      |      |
| 20 |      |      |      |      |      |      |      |      |      |
| 21 |      |      |      |      |      |      |      |      |      |
| 22 |      |      |      |      |      |      |      |      |      |
| 23 |      |      |      |      |      |      |      |      |      |
| 24 |      |      |      |      |      |      |      |      |      |
| 25 |      |      |      |      |      |      |      |      |      |
| 26 |      |      |      |      |      |      |      |      |      |
| 27 |      |      |      |      |      |      |      |      |      |
| 28 |      |      |      |      |      |      |      |      |      |
| 29 |      |      |      |      |      |      |      |      |      |
| 30 |      |      |      |      |      |      |      |      |      |
| 31 |      |      |      |      |      |      |      |      |      |
| 32 |      |      |      |      |      |      |      |      |      |
| 33 |      |      |      |      |      |      |      |      |      |
| 34 |      |      |      |      |      |      |      |      |      |
| 35 |      |      |      |      |      |      |      |      |      |
| 36 |      |      |      |      |      |      |      |      |      |
| 37 |      |      |      |      |      |      |      |      |      |
| 38 |      |      |      |      |      |      |      |      |      |
| 39 |      |      |      |      |      |      |      |      |      |
| 40 |      |      |      |      |      |      |      |      |      |
| 41 |      |      |      |      |      |      |      |      |      |
| 42 |      |      |      |      |      |      |      |      |      |
| 43 |      |      |      |      |      |      |      |      |      |
| 44 |      |      |      |      |      |      |      |      |      |
| 45 |      |      |      |      |      |      |      |      |      |
| 46 |      |      |      |      |      |      |      |      |      |
| 47 |      |      |      |      |      |      |      |      |      |
| 48 |      |      |      |      |      |      |      |      |      |
| 49 |      |      |      |      |      |      |      |      |      |
| 50 |      |      |      |      |      |      |      |      |      |
| 51 |      |      |      |      |      |      |      |      |      |
| 52 |      |      |      |      |      |      |      |      |      |
| 53 |      |      |      |      |      |      |      |      |      |
| 54 |      |      |      |      |      |      |      |      |      |
| 55 |      |      |      |      |      |      |      |      |      |
| 56 |      |      |      |      |      |      |      |      |      |
| 57 |      |      |      |      |      |      |      |      |      |
| 58 |      |      |      |      |      |      |      |      |      |
| 59 |      |      |      |      |      |      |      |      |      |
| 60 |      |      |      |      |      |      |      |      |      |

For peer review only

1  
2  
3  
4  
5  
6  
7  
8  
9  
10  
11  
12  
13  
14  
15  
16  
17  
18  
19  
20  
21  
22  
23  
24  
25  
26  
27  
28  
29  
30  
31  
32  
33  
34  
35  
36  
37  
38  
39  
40  
41  
42  
43  
44  
45  
46  
47  
48  
49  
50  
51  
52  
53  
54  
55  
56  
57  
58  
59  
60

| <b>RGT</b> | <b>RWA</b> | <b>RJ1</b> | <b>RRV</b> | <b>RH8</b> | <b>RVV</b> | <b>RM1</b> | <b>RTD</b> | <b>RTE</b> |
|------------|------------|------------|------------|------------|------------|------------|------------|------------|
| 0.74       | 0.73       | 0.73       | 0.67       | 0.76       | 0.74       | 0.78       | 0.76       | 0.75       |
| 0.58       | 0.56       | 0.59       | 0.57       | 0.65       | 0.53       | 0.58       | 0.60       | 0.59       |
| 0.54       | 0.53       | 0.50       | 0.50       | 0.57       | 0.47       | 0.50       | 0.55       | 0.47       |
| 0.61       | 0.61       | 0.60       | 0.59       | 0.61       | 0.56       | 0.68       | 0.61       | 0.59       |
| 0.82       | 0.76       | 0.77       | 0.73       | 0.84       | 0.77       | 0.77       | 0.81       | 0.82       |
| 0.73       | 0.73       | 0.73       | 0.68       | 0.75       | 0.71       | 0.70       | 0.75       | 0.72       |
| 0.53       | 0.55       | 0.59       | 0.50       | 0.58       | 0.49       | 0.51       | 0.61       | 0.53       |
| 0.82       | 0.85       | 0.83       | 0.81       | 0.86       | 0.83       | 0.84       | 0.87       | 0.85       |
| 0.72       | 0.75       | 0.75       | 0.70       | 0.78       | 0.79       | 0.77       | 0.78       | 0.78       |
| 0.84       | 0.83       | 0.83       | 0.78       | 0.86       | 0.80       | 0.83       | 0.85       | 0.82       |
| 0.75       | 0.76       | 0.70       | 0.72       | 0.79       | 0.69       | 0.71       | 0.78       | 0.74       |
| 0.82       | 0.89       | 0.87       | 0.82       | 0.85       | 0.86       | 0.88       | 0.87       | 0.86       |
| 0.79       | 0.78       | 0.75       | 0.75       | 0.82       | 0.77       | 0.81       | 0.83       | 0.82       |
| 0.67       | 0.67       | 0.67       | 0.61       | 0.71       | 0.57       | 0.66       | 0.70       | 0.67       |
| 0.86       | 0.87       | 0.84       | 0.84       | 0.87       | 0.82       | 0.87       | 0.86       | 0.86       |
| 0.90       | 0.89       | 0.88       | 0.85       | 0.91       | 0.85       | 0.88       | 0.89       | 0.90       |
| 0.81       | 0.77       | 0.77       | 0.75       | 0.82       | 0.75       | 0.77       | 0.83       | 0.77       |
| 0.72       | 0.68       | 0.66       | 0.69       | 0.69       | 0.61       | 0.65       | 0.70       | 0.67       |
| 0.74       | 0.73       | 0.75       | 0.70       | 0.82       | 0.74       | 0.70       | 0.79       | 0.75       |
| 0.71       | 0.65       | 0.69       | 0.64       | 0.76       | 0.68       | 0.72       | 0.72       | 0.68       |
| 0.60       | 0.58       | 0.56       | 0.55       | 0.72       | 0.61       | 0.66       | 0.64       | 0.65       |
| 0.73       | 0.72       | 0.67       | 0.65       | 0.76       | 0.66       | 0.70       | 0.72       | 0.69       |
| 0.95       | 0.95       | 0.97       | 0.94       | 0.98       | 0.94       | 0.96       | 0.95       | 0.97       |
| 0.85       | 0.85       | 0.84       | 0.82       | 0.88       | 0.85       | 0.85       | 0.90       | 0.87       |
| 0.90       | 0.85       | 0.90       | 0.83       | 0.91       | 0.84       | 0.87       | 0.88       | 0.88       |
| 0.30       | 0.35       | 0.35       | 0.32       | 0.29       | 0.31       | 0.31       | 0.33       | 0.23       |
| 0.62       | 0.61       | 0.53       | 0.51       | 0.69       | 0.58       | 0.65       | 0.65       | 0.62       |
| 0.84       | 0.84       | 0.81       | 0.80       | 0.88       | 0.82       | 0.82       | 0.86       | 0.89       |
| 0.82       | 0.83       | 0.85       | 0.83       | 0.85       | 0.80       | 0.82       | 0.87       | 0.85       |
| 0.80       | 0.82       | 0.81       | 0.81       | 0.89       | 0.76       | 0.81       | 0.82       | 0.82       |
| 0.87       | 0.87       | 0.89       | 0.84       | 0.85       | 0.87       | 0.85       | 0.86       | 0.84       |
| 0.83       | 0.82       | 0.81       | 0.74       | 0.87       | 0.81       | 0.83       | 0.84       | 0.83       |
| 0.95       | 0.92       | 0.94       | 0.95       | 0.97       | 0.93       | 0.94       | 0.96       | 0.95       |
| 0.84       | 0.81       | 0.78       | 0.79       | 0.85       | 0.81       | 0.84       | 0.84       | 0.84       |
| 0.91       | 0.90       | 0.85       | 0.86       | 0.92       | 0.86       | 0.89       | 0.88       | 0.89       |
| 0.80       | 0.85       | 0.79       | 0.78       | 0.86       | 0.72       | 0.77       | 0.76       | 0.83       |
| 0.42       | 0.42       | 0.39       | 0.35       | 0.53       | 0.38       | 0.48       | 0.53       | 0.48       |
| 0.95       | 0.95       | 0.95       | 0.93       | 0.96       | 0.93       | 0.94       | 0.94       | 0.93       |
| 0.70       | 0.60       | 0.73       | 0.68       | 0.79       | 0.65       | 0.56       | 0.71       | 0.66       |
| 0.52       | 0.48       | 0.46       | 0.44       | 0.63       | 0.51       | 0.56       | 0.61       | 0.58       |
| 0.91       | 0.88       | 0.89       | 0.88       | 0.92       | 0.84       | 0.92       | 0.90       | 0.90       |
| 0.85       | 0.87       | 0.82       | 0.83       | 0.90       | 0.78       | 0.85       | 0.89       | 0.85       |

|    |      |      |      |      |      |      |      |      |      |
|----|------|------|------|------|------|------|------|------|------|
| 1  |      |      |      |      |      |      |      |      |      |
| 2  | 0.55 | 0.59 | 0.55 | 0.59 | 0.66 | 0.51 | 0.63 | 0.49 | 0.57 |
| 3  | 0.71 | 0.71 | 0.75 | 0.73 | 0.75 | 0.67 | 0.75 | 0.74 | 0.76 |
| 4  | 0.97 | 0.95 | 0.94 | 0.94 | 0.97 | 0.96 | 0.95 | 0.97 | 0.93 |
| 5  | 0.96 | 0.97 | 0.96 | 0.96 | 0.97 | 0.93 | 0.98 | 0.97 | 0.97 |
| 6  | 0.94 | 0.88 | 0.92 | 0.94 | 0.91 | 0.85 | 0.94 | 0.89 | 0.84 |
| 7  | 0.85 | 0.83 | 0.84 | 0.86 | 0.94 | 0.77 | 0.89 | 0.81 | 0.88 |
| 8  | 0.62 | 0.71 | 0.60 | 0.66 | 0.79 | 0.63 | 0.67 | 0.79 | 0.77 |
| 9  | 0.62 | 0.66 | 0.62 | 0.53 | 0.73 | 0.66 | 0.76 | 0.69 | 0.61 |
| 10 | 0.62 | 0.66 | 0.62 | 0.53 | 0.73 | 0.66 | 0.76 | 0.69 | 0.61 |
| 11 | 0.51 | 0.26 | 0.47 | 0.54 | 0.27 | 0.22 | 0.22 | 0.27 | 0.23 |
| 12 |      |      |      |      |      |      |      |      |      |
| 13 |      |      |      |      |      |      |      |      |      |
| 14 |      |      |      |      |      |      |      |      |      |
| 15 |      |      |      |      |      |      |      |      |      |
| 16 |      |      |      |      |      |      |      |      |      |
| 17 |      |      |      |      |      |      |      |      |      |
| 18 |      |      |      |      |      |      |      |      |      |
| 19 |      |      |      |      |      |      |      |      |      |
| 20 |      |      |      |      |      |      |      |      |      |
| 21 |      |      |      |      |      |      |      |      |      |
| 22 |      |      |      |      |      |      |      |      |      |
| 23 |      |      |      |      |      |      |      |      |      |
| 24 |      |      |      |      |      |      |      |      |      |
| 25 |      |      |      |      |      |      |      |      |      |
| 26 |      |      |      |      |      |      |      |      |      |
| 27 |      |      |      |      |      |      |      |      |      |
| 28 |      |      |      |      |      |      |      |      |      |
| 29 |      |      |      |      |      |      |      |      |      |
| 30 |      |      |      |      |      |      |      |      |      |
| 31 |      |      |      |      |      |      |      |      |      |
| 32 |      |      |      |      |      |      |      |      |      |
| 33 |      |      |      |      |      |      |      |      |      |
| 34 |      |      |      |      |      |      |      |      |      |
| 35 |      |      |      |      |      |      |      |      |      |
| 36 |      |      |      |      |      |      |      |      |      |
| 37 |      |      |      |      |      |      |      |      |      |
| 38 |      |      |      |      |      |      |      |      |      |
| 39 |      |      |      |      |      |      |      |      |      |
| 40 |      |      |      |      |      |      |      |      |      |
| 41 |      |      |      |      |      |      |      |      |      |
| 42 |      |      |      |      |      |      |      |      |      |
| 43 |      |      |      |      |      |      |      |      |      |
| 44 |      |      |      |      |      |      |      |      |      |
| 45 |      |      |      |      |      |      |      |      |      |
| 46 |      |      |      |      |      |      |      |      |      |
| 47 |      |      |      |      |      |      |      |      |      |
| 48 |      |      |      |      |      |      |      |      |      |
| 49 |      |      |      |      |      |      |      |      |      |
| 50 |      |      |      |      |      |      |      |      |      |
| 51 |      |      |      |      |      |      |      |      |      |
| 52 |      |      |      |      |      |      |      |      |      |
| 53 |      |      |      |      |      |      |      |      |      |
| 54 |      |      |      |      |      |      |      |      |      |
| 55 |      |      |      |      |      |      |      |      |      |
| 56 |      |      |      |      |      |      |      |      |      |
| 57 |      |      |      |      |      |      |      |      |      |
| 58 |      |      |      |      |      |      |      |      |      |
| 59 |      |      |      |      |      |      |      |      |      |
| 60 |      |      |      |      |      |      |      |      |      |

For peer review only

1  
2  
3  
4  
5  
6  
7  
8  
9  
10  
11  
12  
13  
14  
15  
16  
17  
18  
19  
20  
21  
22  
23  
24  
25  
26  
27  
28  
29  
30  
31  
32  
33  
34  
35  
36  
37  
38  
39  
40  
41  
42  
43  
44  
45  
46  
47  
48  
49  
50  
51  
52  
53  
54  
55  
56  
57  
58  
59  
60

|  | <b>RWE</b> | <b>RTH</b> | <b>RHQ</b> | <b>RPY</b> |
|--|------------|------------|------------|------------|
|  | 0.68       | 0.73       | 0.74       | 0.71       |
|  | 0.56       | 0.62       | 0.59       | 0.58       |
|  | 0.47       | 0.53       | 0.53       | 0.59       |
|  | 0.57       | 0.57       | 0.61       | 0.63       |
|  | 0.78       | 0.80       | 0.77       | 0.82       |
|  | 0.68       | 0.74       | 0.76       | 0.70       |
|  | 0.50       | 0.58       | 0.57       | 0.53       |
|  | 0.81       | 0.83       | 0.82       | 0.80       |
|  | 0.73       | 0.79       | 0.76       | 0.73       |
|  | 0.81       | 0.83       | 0.85       | 0.79       |
|  | 0.67       | 0.74       | 0.72       | 0.78       |
|  | 0.86       | 0.85       | 0.90       | 0.90       |
|  | 0.76       | 0.79       | 0.78       | 0.80       |
|  | 0.61       | 0.66       | 0.67       | 0.64       |
|  | 0.83       | 0.89       | 0.83       | 0.85       |
|  | 0.85       | 0.90       | 0.87       | 0.92       |
|  | 0.75       | 0.79       | 0.78       | 0.77       |
|  | 0.62       | 0.66       | 0.69       | 0.73       |
|  | 0.72       | 0.75       | 0.77       | 0.80       |
|  | 0.70       | 0.74       | 0.69       | 0.69       |
|  | 0.57       | 0.68       | 0.61       | 0.55       |
|  | 0.66       | 0.70       | 0.69       | 0.72       |
|  | 0.95       | 0.95       | 0.97       | 0.97       |
|  | 0.80       | 0.87       | 0.85       | 0.87       |
|  | 0.83       | 0.88       | 0.88       | 0.90       |
|  | 0.29       | 0.34       | 0.34       | 0.26       |
|  | 0.59       | 0.63       | 0.61       | 0.55       |
|  | 0.81       | 0.85       | 0.83       | 0.89       |
|  | 0.79       | 0.82       | 0.87       | 0.87       |
|  | 0.76       | 0.83       | 0.83       | 0.79       |
|  | 0.84       | 0.89       | 0.87       | 0.88       |
|  | 0.81       | 0.82       | 0.84       | 0.78       |
|  | 0.94       | 0.94       | 0.94       | 0.97       |
|  | 0.77       | 0.83       | 0.82       | 0.85       |
|  | 0.87       | 0.89       | 0.89       | 0.86       |
|  | 0.78       | 0.75       | 0.80       | 0.80       |
|  | 0.44       | 0.44       | 0.46       | 0.39       |
|  | 0.94       | 0.95       | 0.96       | 0.97       |
|  | 0.62       | 0.73       | 0.67       | 0.79       |
|  | 0.51       | 0.54       | 0.56       | 0.48       |
|  | 0.88       | 0.88       | 0.89       | 0.91       |
|  | 0.87       | 0.85       | 0.87       | 0.83       |

|    |      |      |      |      |
|----|------|------|------|------|
| 1  |      |      |      |      |
| 2  | 0.55 | 0.59 | 0.59 | 0.57 |
| 3  | 0.75 | 0.73 | 0.76 | 0.82 |
| 4  | 0.97 | 0.96 | 0.93 | 0.97 |
| 5  | 0.95 | 0.96 | 0.95 | 0.96 |
| 6  | 0.89 | 0.89 | 0.91 | 0.94 |
| 7  | 0.76 | 0.88 | 0.89 | 0.82 |
| 8  | 0.75 | 0.73 | 0.67 | 0.65 |
| 9  | 0.56 | 0.68 | 0.64 | 0.59 |
| 10 | 0.32 | 0.43 | 0.37 | 0.56 |
| 11 |      |      |      |      |
| 12 |      |      |      |      |
| 13 |      |      |      |      |
| 14 |      |      |      |      |
| 15 |      |      |      |      |
| 16 |      |      |      |      |
| 17 |      |      |      |      |
| 18 |      |      |      |      |
| 19 |      |      |      |      |
| 20 |      |      |      |      |
| 21 |      |      |      |      |
| 22 |      |      |      |      |
| 23 |      |      |      |      |
| 24 |      |      |      |      |
| 25 |      |      |      |      |
| 26 |      |      |      |      |
| 27 |      |      |      |      |
| 28 |      |      |      |      |
| 29 |      |      |      |      |
| 30 |      |      |      |      |
| 31 |      |      |      |      |
| 32 |      |      |      |      |
| 33 |      |      |      |      |
| 34 |      |      |      |      |
| 35 |      |      |      |      |
| 36 |      |      |      |      |
| 37 |      |      |      |      |
| 38 |      |      |      |      |
| 39 |      |      |      |      |
| 40 |      |      |      |      |
| 41 |      |      |      |      |
| 42 |      |      |      |      |
| 43 |      |      |      |      |
| 44 |      |      |      |      |
| 45 |      |      |      |      |
| 46 |      |      |      |      |
| 47 |      |      |      |      |
| 48 |      |      |      |      |
| 49 |      |      |      |      |
| 50 |      |      |      |      |
| 51 |      |      |      |      |
| 52 |      |      |      |      |
| 53 |      |      |      |      |
| 54 |      |      |      |      |
| 55 |      |      |      |      |
| 56 |      |      |      |      |
| 57 |      |      |      |      |
| 58 |      |      |      |      |
| 59 |      |      |      |      |
| 60 |      |      |      |      |

For peer review only

**Table 3.** Main central grid: Reliability of hospital scores by question for each of the 146 hospitals included between hospital variance starting with the question with the lowest variance ( Q10 with between hospital variance 0.0151), starting with the hospital with the lowest sample size (RQX with sample size equal to 31). These

**Notes**

- The **between hospital variance** is given in a log-odds scale. These variances are the direct output of the reliability analysis.
- The **sample size** is the number of completed questionnaires received by the corresponding hospital.
- Entries with NA come from hospitals which received less than 21 responses for the corresponding question.

| Between Hospital Variance | Sample Size | 31   | 32   | 53   | 71   | 71   |
|---------------------------|-------------|------|------|------|------|------|
|                           | Hospitals   | RQX  | RRJ  | RT3  | RMP  | RPC  |
| 0.0151                    | Q10         | 0.09 | 0.09 | 0.11 | 0.14 | 0.17 |
| 0.0154                    | Q49         | 0.08 | 0.09 | 0.14 | 0.18 | 0.16 |
| 0.0159                    | Q35         | NA   | 0.08 | 0.11 | 0.14 | 0.11 |
| 0.0162                    | Q45         | NA   | NA   | NA   | 0.06 | NA   |
| 0.0168                    | Q26         | 0.06 | 0.08 | 0.11 | 0.11 | 0.14 |
| 0.0178                    | Q13         | 0.10 | 0.11 | 0.15 | 0.18 | 0.19 |
| 0.0182                    | Q15         | 0.11 | 0.11 | 0.13 | 0.21 | 0.19 |
| 0.0198                    | Q9          | 0.09 | 0.09 | 0.11 | 0.08 | 0.14 |
| 0.0200                    | Q1          | 0.07 | 0.09 | 0.12 | 0.18 | 0.11 |
| 0.0207                    | Q12         | 0.11 | 0.06 | 0.13 | 0.11 | 0.15 |
| 0.0216                    | Q30         | NA   | 0.11 | 0.16 | 0.14 | 0.10 |
| 0.0227                    | Q44         | NA   | NA   | NA   | 0.06 | NA   |
| 0.0234                    | Q7          | 0.11 | 0.11 | 0.13 | 0.19 | 0.20 |
| 0.0249                    | Q14         | 0.15 | 0.16 | 0.21 | 0.23 | 0.27 |
| 0.0273                    | Q34         | 0.05 | 0.03 | 0.11 | 0.09 | 0.13 |
| 0.0280                    | Q37         | NA   | 0.05 | 0.11 | 0.11 | 0.11 |
| 0.0280                    | Q16         | 0.14 | 0.14 | 0.20 | 0.20 | 0.26 |
| 0.0293                    | Q48         | NA   | NA   | NA   | NA   | NA   |
| 0.0296                    | Q31         | 0.11 | 0.14 | 0.18 | 0.19 | 0.21 |
| 0.0321                    | Q11         | 0.18 | 0.16 | 0.22 | 0.27 | 0.27 |
| 0.0328                    | Q53         | 0.11 | 0.15 | 0.22 | 0.27 | 0.22 |
| 0.0332                    | Q41         | 0.14 | NA   | 0.16 | 0.22 | 0.24 |
| 0.0337                    | Q25         | 0.10 | 0.06 | 0.09 | 0.03 | 0.09 |
| 0.0349                    | Q29         | NA   | 0.09 | 0.14 | 0.14 | 0.14 |
| 0.0350                    | Q6          | 0.09 | 0.11 | 0.11 | 0.21 | 0.12 |
| 0.0371                    | Q55         | 0.11 | 0.19 | 0.25 | 0.31 | 0.29 |
| 0.0374                    | Q54         | 0.20 | 0.23 | 0.30 | 0.35 | 0.36 |
| 0.0383                    | Q36         | 0.11 | 0.15 | 0.12 | 0.10 | 0.15 |
| 0.0387                    | Q47         | NA   | NA   | NA   | 0.09 | NA   |
| 0.0395                    | Q21         | 0.19 | 0.15 | 0.14 | 0.21 | 0.17 |
| 0.0414                    | Q38         | NA   | 0.12 | 0.20 | 0.16 | 0.16 |
| 0.0439                    | Q2          | 0.13 | 0.24 | 0.21 | 0.24 | 0.29 |
| 0.0475                    | Q5          | 0.00 | 0.04 | 0.08 | 0.08 | 0.18 |
| 0.0483                    | Q28         | NA   | 0.14 | 0.30 | 0.23 | 0.30 |

|    |        |            |      |      |      |      |      |  |
|----|--------|------------|------|------|------|------|------|--|
| 1  |        |            |      |      |      |      |      |  |
| 2  | 0.0497 | <b>Q19</b> | NA   | NA   | 0.09 | 0.16 | 0.23 |  |
| 3  | 0.0532 | <b>Q23</b> | NA   | NA   | NA   | 0.19 | 0.17 |  |
| 4  | 0.0564 | <b>Q51</b> | NA   | NA   | NA   | 0.28 | NA   |  |
| 5  | 0.0607 | <b>Q39</b> | NA   | 0.20 | 0.10 | 0.10 | 0.18 |  |
| 6  | 0.0615 | <b>Q32</b> | NA   | 0.20 | 0.34 | 0.43 | 0.35 |  |
| 7  | 0.0727 | <b>Q50</b> | NA   | 0.29 | 0.28 | 0.48 | 0.34 |  |
| 8  | 0.0740 | <b>Q56</b> | 0.24 | 0.21 | 0.12 | 0.29 | 0.32 |  |
| 9  | 0.0778 | <b>Q18</b> | NA   | 0.07 | 0.25 | 0.26 | 0.32 |  |
| 10 | 0.0793 | <b>Q22</b> | NA   | NA   | 0.34 | 0.37 | 0.32 |  |
| 11 | 0.0836 | <b>Q8</b>  | 0.28 | 0.31 | 0.40 | 0.47 | 0.53 |  |
| 12 | 0.0849 | <b>Q52</b> | 0.22 | 0.14 | 0.31 | 0.00 | 0.19 |  |
| 13 | 0.0881 | <b>Q42</b> | 0.14 | 0.00 | 0.08 | 0.15 | 0.29 |  |
| 14 | 0.0936 | <b>Q17</b> | 0.35 | 0.20 | 0.21 | 0.15 | 0.48 |  |
| 15 | 0.1046 | <b>Q20</b> | NA   | 0.26 | 0.31 | 0.36 | 0.45 |  |
| 16 | 0.1084 | <b>Q33</b> | 0.35 | 0.38 | 0.54 | 0.57 | 0.54 |  |
| 17 | 0.1341 | <b>Q57</b> | 0.49 | 0.51 | 0.44 | 0.70 | 0.57 |  |
| 18 | 0.1930 | <b>Q58</b> | 0.54 | 0.47 | 0.62 | 0.72 | 0.60 |  |
| 19 |        |            |      |      |      |      |      |  |
| 20 |        |            |      |      |      |      |      |  |
| 21 |        |            |      |      |      |      |      |  |
| 22 |        |            |      |      |      |      |      |  |
| 23 |        |            |      |      |      |      |      |  |
| 24 |        |            |      |      |      |      |      |  |
| 25 |        |            |      |      |      |      |      |  |
| 26 |        |            |      |      |      |      |      |  |
| 27 |        |            |      |      |      |      |      |  |
| 28 |        |            |      |      |      |      |      |  |
| 29 |        |            |      |      |      |      |      |  |
| 30 |        |            |      |      |      |      |      |  |
| 31 |        |            |      |      |      |      |      |  |
| 32 |        |            |      |      |      |      |      |  |
| 33 |        |            |      |      |      |      |      |  |
| 34 |        |            |      |      |      |      |      |  |
| 35 |        |            |      |      |      |      |      |  |
| 36 |        |            |      |      |      |      |      |  |
| 37 |        |            |      |      |      |      |      |  |
| 38 |        |            |      |      |      |      |      |  |
| 39 |        |            |      |      |      |      |      |  |
| 40 |        |            |      |      |      |      |      |  |
| 41 |        |            |      |      |      |      |      |  |
| 42 |        |            |      |      |      |      |      |  |
| 43 |        |            |      |      |      |      |      |  |
| 44 |        |            |      |      |      |      |      |  |
| 45 |        |            |      |      |      |      |      |  |
| 46 |        |            |      |      |      |      |      |  |
| 47 |        |            |      |      |      |      |      |  |
| 48 |        |            |      |      |      |      |      |  |
| 49 |        |            |      |      |      |      |      |  |
| 50 |        |            |      |      |      |      |      |  |
| 51 |        |            |      |      |      |      |      |  |
| 52 |        |            |      |      |      |      |      |  |
| 53 |        |            |      |      |      |      |      |  |
| 54 |        |            |      |      |      |      |      |  |
| 55 |        |            |      |      |      |      |      |  |
| 56 |        |            |      |      |      |      |      |  |
| 57 |        |            |      |      |      |      |      |  |
| 58 |        |            |      |      |      |      |      |  |
| 59 |        |            |      |      |      |      |      |  |
| 60 |        |            |      |      |      |      |      |  |

included in the analysis (CPES 2016). The questions are ordered according to their hospital variance equal to 0.0151). The hospitals are ordered according to their sample values correspond to the cells in Figure 3.

of each of the 51 fitted logisted regression models.

al.

; question.

|     | 73   | 74   | 76   | 102  | 108  | 111  | 112  | 115  | 122  |
|-----|------|------|------|------|------|------|------|------|------|
| REP | 0.17 | 0.18 | 0.12 | 0.18 | 0.23 | 0.27 | 0.26 | 0.28 | 0.26 |
| RAN | 0.20 | 0.19 | 0.18 | 0.23 | 0.24 | 0.24 | 0.24 | 0.23 | 0.25 |
| RGM | 0.16 | 0.14 | 0.11 | 0.19 | 0.16 | 0.16 | 0.14 | 0.16 | 0.12 |
| RBQ | NA   |
| R1F | 0.13 | 0.15 | 0.11 | 0.17 | 0.16 | 0.14 | 0.15 | 0.14 | 0.13 |
| RKE | 0.20 | 0.21 | 0.15 | 0.22 | 0.28 | 0.29 | 0.27 | 0.25 | 0.29 |
| RE9 | 0.23 | 0.21 | 0.20 | 0.27 | 0.29 | 0.30 | 0.30 | 0.31 | 0.31 |
| RJ6 | 0.18 | 0.19 | 0.05 | 0.23 | 0.20 | 0.20 | 0.16 | 0.20 | 0.28 |
| RVY | 0.16 | 0.21 | 0.13 | 0.24 | 0.21 | 0.24 | 0.22 | 0.24 | 0.23 |
|     | 0.10 | 0.13 | 0.07 | 0.18 | 0.26 | 0.23 | 0.23 | 0.19 | 0.24 |
|     | 0.15 | 0.21 | 0.11 | 0.22 | 0.20 | 0.14 | 0.19 | 0.23 | 0.17 |
|     | NA   | NA   | NA   | NA   | NA   | 0.07 | NA   | 0.04 | NA   |
|     | 0.14 | 0.25 | 0.14 | 0.27 | 0.27 | 0.26 | 0.30 | 0.29 | 0.22 |
|     | 0.26 | 0.28 | 0.26 | 0.34 | 0.38 | 0.34 | 0.32 | 0.36 | 0.40 |
|     | 0.05 | 0.09 | 0.09 | 0.23 | 0.28 | 0.11 | 0.14 | 0.19 | 0.19 |
|     | 0.13 | 0.18 | 0.07 | 0.18 | 0.21 | 0.09 | 0.11 | 0.20 | 0.16 |
|     | 0.26 | 0.27 | 0.12 | 0.30 | 0.37 | 0.35 | 0.34 | 0.36 | 0.32 |
|     | NA   | NA   | NA   | 0.13 | 0.16 | 0.24 | 0.23 | 0.17 | 0.20 |
|     | 0.24 | 0.28 | 0.23 | 0.24 | 0.29 | 0.22 | 0.25 | 0.31 | 0.24 |
|     | 0.32 | 0.31 | 0.25 | 0.39 | 0.40 | 0.39 | 0.37 | 0.39 | 0.36 |
|     | 0.28 | 0.31 | 0.28 | 0.37 | 0.36 | 0.36 | 0.40 | 0.37 | 0.40 |
|     | 0.21 | 0.26 | 0.25 | 0.32 | 0.34 | 0.34 | 0.34 | 0.34 | 0.34 |
|     | 0.03 | 0.15 | 0.00 | 0.00 | 0.09 | 0.03 | 0.13 | 0.14 | 0.09 |
|     | 0.12 | 0.20 | 0.09 | 0.28 | 0.22 | 0.21 | 0.24 | 0.26 | 0.16 |
|     | 0.18 | 0.34 | 0.16 | 0.23 | 0.30 | 0.22 | 0.14 | 0.26 | 0.24 |
|     | 0.31 | 0.27 | 0.36 | 0.40 | 0.44 | 0.42 | 0.43 | 0.41 | 0.40 |
|     | 0.39 | 0.40 | 0.34 | 0.47 | 0.49 | 0.45 | 0.45 | 0.47 | 0.51 |
|     | 0.17 | 0.24 | 0.07 | 0.25 | 0.21 | 0.12 | 0.22 | 0.24 | 0.21 |
|     | NA   | NA   | NA   | NA   | 0.14 | 0.21 | 0.10 | 0.15 | 0.26 |
|     | 0.13 | 0.23 | 0.13 | 0.36 | 0.35 | 0.29 | 0.24 | 0.23 | 0.32 |
|     | 0.11 | 0.26 | 0.10 | 0.19 | 0.26 | 0.16 | 0.28 | 0.26 | 0.28 |
|     | 0.33 | 0.44 | 0.14 | 0.36 | 0.40 | 0.36 | 0.33 | 0.40 | 0.41 |
|     | 0.08 | 0.18 | 0.12 | 0.21 | 0.28 | 0.26 | 0.12 | 0.32 | 0.18 |
|     | 0.23 | 0.36 | 0.25 | 0.47 | 0.39 | 0.27 | 0.31 | 0.40 | 0.23 |



|    |      |      |      |      |      |      |      |      |      |
|----|------|------|------|------|------|------|------|------|------|
| 1  |      |      |      |      |      |      |      |      |      |
| 2  | 0.23 | 0.28 | 0.09 | 0.36 | 0.30 | 0.27 | 0.24 | 0.16 | 0.16 |
| 3  | 0.15 | 0.28 | 0.17 | 0.25 | 0.23 | 0.17 | 0.26 | 0.33 | 0.32 |
| 4  | 0.20 | 0.35 | 0.23 | 0.44 | 0.33 | 0.33 | 0.32 | 0.31 | 0.33 |
| 5  | 0.11 | 0.22 | 0.10 | 0.30 | 0.28 | 0.10 | 0.10 | 0.28 | 0.32 |
| 6  | 0.40 | 0.41 | 0.33 | 0.45 | 0.52 | 0.43 | 0.43 | 0.50 | 0.43 |
| 7  | 0.40 | 0.49 | 0.38 | 0.58 | 0.53 | 0.52 | 0.52 | 0.50 | 0.51 |
| 8  | 0.26 | 0.44 | 0.18 | 0.29 | 0.50 | 0.26 | 0.26 | 0.40 | 0.36 |
| 9  | 0.22 | 0.44 | 0.30 | 0.36 | 0.48 | 0.41 | 0.23 | 0.13 | 0.49 |
| 10 | 0.36 | 0.43 | 0.41 | 0.53 | 0.53 | 0.42 | 0.57 | 0.49 | 0.51 |
| 11 | 0.55 | 0.53 | 0.40 | 0.58 | 0.62 | 0.59 | 0.43 | 0.58 | 0.66 |
| 12 | 0.19 | 0.28 | 0.20 | 0.29 | 0.32 | 0.32 | 0.08 | 0.29 | 0.20 |
| 13 | 0.00 | 0.20 | 0.08 | 0.20 | 0.29 | 0.25 | 0.20 | 0.20 | 0.00 |
| 14 | 0.21 | 0.42 | 0.37 | 0.46 | 0.46 | 0.21 | 0.26 | 0.50 | 0.58 |
| 15 | 0.23 | 0.46 | 0.28 | 0.60 | 0.58 | 0.29 | 0.52 | 0.45 | 0.58 |
| 16 | 0.54 | 0.62 | 0.45 | 0.65 | 0.67 | 0.56 | 0.52 | 0.67 | 0.52 |
| 17 | 0.69 | 0.70 | 0.63 | 0.74 | 0.71 | 0.76 | 0.69 | 0.76 | 0.77 |
| 18 | 0.73 | 0.77 | 0.77 | 0.81 | 0.56 | 0.82 | 0.79 | 0.79 | 0.69 |
| 19 |      |      |      |      |      |      |      |      |      |
| 20 |      |      |      |      |      |      |      |      |      |
| 21 |      |      |      |      |      |      |      |      |      |
| 22 |      |      |      |      |      |      |      |      |      |
| 23 |      |      |      |      |      |      |      |      |      |
| 24 |      |      |      |      |      |      |      |      |      |
| 25 |      |      |      |      |      |      |      |      |      |
| 26 |      |      |      |      |      |      |      |      |      |
| 27 |      |      |      |      |      |      |      |      |      |
| 28 |      |      |      |      |      |      |      |      |      |
| 29 |      |      |      |      |      |      |      |      |      |
| 30 |      |      |      |      |      |      |      |      |      |
| 31 |      |      |      |      |      |      |      |      |      |
| 32 |      |      |      |      |      |      |      |      |      |
| 33 |      |      |      |      |      |      |      |      |      |
| 34 |      |      |      |      |      |      |      |      |      |
| 35 |      |      |      |      |      |      |      |      |      |
| 36 |      |      |      |      |      |      |      |      |      |
| 37 |      |      |      |      |      |      |      |      |      |
| 38 |      |      |      |      |      |      |      |      |      |
| 39 |      |      |      |      |      |      |      |      |      |
| 40 |      |      |      |      |      |      |      |      |      |
| 41 |      |      |      |      |      |      |      |      |      |
| 42 |      |      |      |      |      |      |      |      |      |
| 43 |      |      |      |      |      |      |      |      |      |
| 44 |      |      |      |      |      |      |      |      |      |
| 45 |      |      |      |      |      |      |      |      |      |
| 46 |      |      |      |      |      |      |      |      |      |
| 47 |      |      |      |      |      |      |      |      |      |
| 48 |      |      |      |      |      |      |      |      |      |
| 49 |      |      |      |      |      |      |      |      |      |
| 50 |      |      |      |      |      |      |      |      |      |
| 51 |      |      |      |      |      |      |      |      |      |
| 52 |      |      |      |      |      |      |      |      |      |
| 53 |      |      |      |      |      |      |      |      |      |
| 54 |      |      |      |      |      |      |      |      |      |
| 55 |      |      |      |      |      |      |      |      |      |
| 56 |      |      |      |      |      |      |      |      |      |
| 57 |      |      |      |      |      |      |      |      |      |
| 58 |      |      |      |      |      |      |      |      |      |
| 59 |      |      |      |      |      |      |      |      |      |
| 60 |      |      |      |      |      |      |      |      |      |

1  
2  
3  
4  
5  
6  
7  
8  
9  
10  
11  
12  
13  
14  
15  
16  
17  
18  
19  
20  
21  
22  
23  
24  
25  
26  
27  
28  
29  
30  
31  
32  
33  
34  
35  
36  
37  
38  
39  
40  
41  
42  
43  
44  
45  
46  
47  
48  
49  
50  
51  
52  
53  
54  
55  
56  
57  
58  
59  
60

133 136 138 141 147 151 152 158 170

| RA4  | RJN  | RAS  | RFR  | RAX  | RWW  | RM3  | RQM  | RVR  |
|------|------|------|------|------|------|------|------|------|
| 0.25 | 0.27 | 0.29 | 0.23 | 0.33 | 0.32 | 0.31 | 0.33 | 0.37 |
| 0.27 | 0.26 | 0.30 | 0.30 | 0.30 | 0.30 | 0.30 | 0.30 | 0.31 |
| 0.16 | 0.14 | 0.19 | 0.19 | 0.20 | 0.20 | 0.24 | 0.20 | 0.18 |
| NA   | 0.11 | 0.09 | 0.07 | NA   | 0.09 | 0.10 | 0.11 | NA   |
| 0.19 | 0.17 | 0.18 | 0.12 | 0.17 | 0.19 | 0.18 | 0.19 | 0.16 |
| 0.30 | 0.34 | 0.33 | 0.30 | 0.35 | 0.36 | 0.28 | 0.36 | 0.37 |
| 0.34 | 0.35 | 0.35 | 0.34 | 0.33 | 0.37 | 0.37 | 0.38 | 0.39 |
| 0.24 | 0.21 | 0.22 | 0.20 | 0.26 | 0.28 | 0.22 | 0.29 | 0.32 |
| 0.21 | 0.22 | 0.28 | 0.21 | 0.29 | 0.23 | 0.27 | 0.28 | 0.35 |
| 0.25 | 0.26 | 0.23 | 0.19 | 0.28 | 0.29 | 0.21 | 0.33 | 0.30 |
| 0.17 | 0.17 | 0.25 | 0.17 | 0.25 | 0.25 | 0.25 | 0.22 | 0.25 |
| 0.04 | 0.07 | 0.09 | 0.06 | NA   | 0.11 | 0.07 | 0.07 | NA   |
| 0.34 | 0.21 | 0.34 | 0.31 | 0.34 | 0.36 | 0.27 | 0.34 | 0.36 |
| 0.36 | 0.41 | 0.40 | 0.39 | 0.45 | 0.45 | 0.41 | 0.46 | 0.46 |
| 0.22 | 0.20 | 0.21 | 0.17 | 0.24 | 0.27 | 0.26 | 0.24 | 0.18 |
| 0.15 | 0.16 | 0.21 | 0.17 | 0.23 | 0.20 | 0.26 | 0.31 | 0.22 |
| 0.31 | 0.31 | 0.39 | 0.36 | 0.38 | 0.46 | 0.33 | 0.47 | 0.42 |
| 0.25 | 0.27 | 0.26 | 0.28 | 0.25 | 0.21 | 0.13 | 0.30 | 0.23 |
| 0.31 | 0.22 | 0.35 | 0.24 | 0.35 | 0.31 | 0.41 | 0.37 | 0.35 |
| 0.42 | 0.37 | 0.41 | 0.38 | 0.44 | 0.48 | 0.41 | 0.50 | 0.48 |
| 0.38 | 0.43 | 0.40 | 0.37 | 0.42 | 0.43 | 0.46 | 0.44 | 0.41 |
| 0.34 | 0.41 | 0.42 | 0.38 | 0.40 | 0.43 | 0.34 | 0.46 | 0.39 |
| 0.06 | 0.16 | 0.09 | 0.03 | 0.09 | 0.14 | 0.14 | 0.18 | 0.15 |
| 0.30 | 0.16 | 0.27 | 0.18 | 0.33 | 0.27 | 0.27 | 0.25 | 0.25 |
| 0.30 | 0.19 | 0.31 | 0.26 | 0.24 | 0.43 | 0.29 | 0.32 | 0.39 |
| 0.44 | 0.47 | 0.49 | 0.51 | 0.43 | 0.49 | 0.51 | 0.49 | 0.51 |
| 0.50 | 0.51 | 0.54 | 0.50 | 0.54 | 0.56 | 0.55 | 0.57 | 0.58 |
| 0.24 | 0.19 | 0.26 | 0.20 | 0.32 | 0.32 | 0.24 | 0.30 | 0.23 |
| 0.17 | 0.23 | 0.15 | 0.17 | 0.30 | 0.25 | 0.07 | 0.29 | 0.17 |
| 0.30 | 0.22 | 0.34 | 0.24 | 0.33 | 0.40 | 0.26 | 0.37 | 0.27 |
| 0.35 | 0.18 | 0.33 | 0.21 | 0.32 | 0.33 | 0.27 | 0.32 | 0.16 |
| 0.32 | 0.37 | 0.50 | 0.38 | 0.42 | 0.55 | 0.42 | 0.51 | 0.43 |
| 0.12 | 0.18 | 0.32 | 0.16 | 0.32 | 0.37 | 0.26 | 0.34 | 0.19 |
| 0.31 | 0.27 | 0.42 | 0.35 | 0.35 | 0.40 | 0.42 | 0.40 | 0.35 |

|    |      |      |      |      |      |      |      |      |      |
|----|------|------|------|------|------|------|------|------|------|
| 1  |      |      |      |      |      |      |      |      |      |
| 2  | 0.19 | 0.22 | 0.33 | 0.22 | 0.24 | 0.33 | 0.27 | 0.36 | 0.33 |
| 3  | 0.30 | 0.35 | 0.37 | 0.22 | 0.35 | 0.38 | 0.31 | 0.37 | 0.24 |
| 4  | 0.27 | 0.32 | 0.35 | 0.41 | 0.32 | 0.34 | 0.46 | 0.38 | 0.33 |
| 5  | 0.25 | 0.06 | 0.33 | 0.06 | 0.22 | 0.31 | 0.26 | 0.33 | 0.19 |
| 6  | 0.53 | 0.38 | 0.54 | 0.49 | 0.56 | 0.54 | 0.61 | 0.52 | 0.52 |
| 7  | 0.43 | 0.56 | 0.53 | 0.59 | 0.50 | 0.61 | 0.61 | 0.57 | 0.53 |
| 8  | 0.46 | 0.46 | 0.45 | 0.45 | 0.55 | 0.57 | 0.41 | 0.50 | 0.47 |
| 9  | 0.43 | 0.31 | 0.34 | 0.42 | 0.43 | 0.47 | 0.57 | 0.49 | 0.46 |
| 10 | 0.54 | 0.49 | 0.56 | 0.60 | 0.47 | 0.59 | 0.62 | 0.57 | 0.50 |
| 11 | 0.59 | 0.64 | 0.70 | 0.62 | 0.71 | 0.70 | 0.66 | 0.73 | 0.69 |
| 12 | 0.25 | 0.20 | 0.25 | 0.39 | 0.44 | 0.39 | 0.25 | 0.42 | 0.25 |
| 13 | 0.15 | 0.25 | 0.20 | 0.30 | 0.25 | 0.37 | 0.15 | 0.43 | 0.21 |
| 14 | 0.55 | 0.38 | 0.60 | 0.16 | 0.52 | 0.62 | 0.44 | 0.65 | 0.51 |
| 15 | 0.52 | 0.52 | 0.62 | 0.54 | 0.61 | 0.65 | 0.61 | 0.59 | 0.49 |
| 16 | 0.64 | 0.59 | 0.64 | 0.65 | 0.72 | 0.67 | 0.68 | 0.70 | 0.67 |
| 17 | 0.70 | 0.78 | 0.80 | 0.78 | 0.76 | 0.78 | 0.78 | 0.82 | 0.83 |
| 18 | 0.82 | 0.82 | 0.82 | 0.84 | 0.76 | 0.72 | 0.86 | 0.83 | 0.86 |
| 19 |      |      |      |      |      |      |      |      |      |
| 20 |      |      |      |      |      |      |      |      |      |
| 21 |      |      |      |      |      |      |      |      |      |
| 22 |      |      |      |      |      |      |      |      |      |
| 23 |      |      |      |      |      |      |      |      |      |
| 24 |      |      |      |      |      |      |      |      |      |
| 25 |      |      |      |      |      |      |      |      |      |
| 26 |      |      |      |      |      |      |      |      |      |
| 27 |      |      |      |      |      |      |      |      |      |
| 28 |      |      |      |      |      |      |      |      |      |
| 29 |      |      |      |      |      |      |      |      |      |
| 30 |      |      |      |      |      |      |      |      |      |
| 31 |      |      |      |      |      |      |      |      |      |
| 32 |      |      |      |      |      |      |      |      |      |
| 33 |      |      |      |      |      |      |      |      |      |
| 34 |      |      |      |      |      |      |      |      |      |
| 35 |      |      |      |      |      |      |      |      |      |
| 36 |      |      |      |      |      |      |      |      |      |
| 37 |      |      |      |      |      |      |      |      |      |
| 38 |      |      |      |      |      |      |      |      |      |
| 39 |      |      |      |      |      |      |      |      |      |
| 40 |      |      |      |      |      |      |      |      |      |
| 41 |      |      |      |      |      |      |      |      |      |
| 42 |      |      |      |      |      |      |      |      |      |
| 43 |      |      |      |      |      |      |      |      |      |
| 44 |      |      |      |      |      |      |      |      |      |
| 45 |      |      |      |      |      |      |      |      |      |
| 46 |      |      |      |      |      |      |      |      |      |
| 47 |      |      |      |      |      |      |      |      |      |
| 48 |      |      |      |      |      |      |      |      |      |
| 49 |      |      |      |      |      |      |      |      |      |
| 50 |      |      |      |      |      |      |      |      |      |
| 51 |      |      |      |      |      |      |      |      |      |
| 52 |      |      |      |      |      |      |      |      |      |
| 53 |      |      |      |      |      |      |      |      |      |
| 54 |      |      |      |      |      |      |      |      |      |
| 55 |      |      |      |      |      |      |      |      |      |
| 56 |      |      |      |      |      |      |      |      |      |
| 57 |      |      |      |      |      |      |      |      |      |
| 58 |      |      |      |      |      |      |      |      |      |
| 59 |      |      |      |      |      |      |      |      |      |
| 60 |      |      |      |      |      |      |      |      |      |

1  
2  
3  
4  
5  
6  
7  
8  
9  
10  
11  
12  
13  
14  
15  
16  
17  
18  
19  
20  
21  
22  
23  
24  
25  
26  
27  
28  
29  
30  
31  
32  
33  
34  
35  
36  
37  
38  
39  
40  
41  
42  
43  
44  
45  
46  
47  
48  
49  
50  
51  
52  
53  
54  
55  
56  
57  
58  
59  
60

175 189 192 193 200 210 210 211 216

| RJR  | RC1  | RFF  | RJ2  | RA3  | RBT  | REN  | RRF  | RAP  |
|------|------|------|------|------|------|------|------|------|
| 0.35 | 0.32 | 0.35 | 0.39 | 0.38 | 0.39 | 0.38 | 0.40 | 0.42 |
| 0.31 | 0.34 | 0.35 | 0.38 | 0.36 | 0.38 | 0.39 | 0.37 | 0.41 |
| 0.19 | 0.25 | 0.25 | 0.25 | 0.18 | 0.23 | 0.25 | 0.24 | 0.24 |
| 0.09 | 0.12 | 0.09 | 0.11 | NA   | 0.07 | 0.35 | 0.08 | 0.24 |
| 0.19 | 0.27 | 0.20 | 0.24 | 0.20 | 0.24 | 0.12 | 0.25 | 0.25 |
| 0.36 | 0.36 | 0.36 | 0.40 | 0.42 | 0.41 | 0.43 | 0.40 | 0.46 |
| 0.40 | 0.41 | 0.40 | 0.45 | 0.45 | 0.45 | 0.46 | 0.44 | 0.46 |
| 0.29 | 0.33 | 0.24 | 0.33 | 0.38 | 0.32 | 0.36 | 0.35 | 0.42 |
| 0.29 | 0.33 | 0.32 | 0.36 | 0.38 | 0.31 | 0.36 | 0.29 | 0.36 |
| 0.30 | 0.32 | 0.30 | 0.36 | 0.38 | 0.34 | 0.29 | 0.37 | 0.42 |
| 0.24 | 0.30 | 0.25 | 0.25 | 0.27 | 0.30 | 0.27 | 0.28 | 0.31 |
| 0.09 | 0.12 | 0.04 | 0.09 | 0.06 | 0.08 | 0.29 | 0.04 | 0.19 |
| 0.27 | 0.37 | 0.36 | 0.41 | 0.42 | 0.42 | 0.39 | 0.41 | 0.47 |
| 0.46 | 0.49 | 0.48 | 0.52 | 0.52 | 0.51 | 0.53 | 0.53 | 0.55 |
| 0.18 | 0.31 | 0.24 | 0.30 | 0.24 | 0.23 | 0.23 | 0.26 | 0.34 |
| 0.14 | 0.29 | 0.17 | 0.31 | 0.20 | 0.25 | 0.17 | 0.26 | 0.35 |
| 0.37 | 0.45 | 0.42 | 0.47 | 0.52 | 0.44 | 0.48 | 0.49 | 0.57 |
| 0.25 | 0.27 | 0.29 | 0.41 | 0.39 | 0.26 | 0.37 | 0.31 | 0.49 |
| 0.33 | 0.41 | 0.29 | 0.39 | 0.32 | 0.37 | 0.36 | 0.32 | 0.44 |
| 0.44 | 0.51 | 0.50 | 0.50 | 0.53 | 0.54 | 0.53 | 0.52 | 0.57 |
| 0.47 | 0.51 | 0.47 | 0.52 | 0.49 | 0.46 | 0.53 | 0.49 | 0.56 |
| 0.44 | 0.50 | 0.41 | 0.50 | 0.51 | 0.49 | 0.54 | 0.51 | 0.57 |
| 0.03 | 0.16 | 0.00 | 0.11 | 0.16 | 0.03 | 0.06 | 0.12 | 0.11 |
| 0.24 | 0.38 | 0.24 | 0.37 | 0.29 | 0.37 | 0.34 | 0.29 | 0.45 |
| 0.33 | 0.41 | 0.28 | 0.39 | 0.42 | 0.35 | 0.39 | 0.30 | 0.44 |
| 0.55 | 0.54 | 0.56 | 0.52 | 0.52 | 0.55 | 0.59 | 0.61 | 0.60 |
| 0.60 | 0.61 | 0.59 | 0.63 | 0.63 | 0.60 | 0.62 | 0.63 | 0.65 |
| 0.30 | 0.42 | 0.27 | 0.30 | 0.27 | 0.33 | 0.37 | 0.35 | 0.41 |
| 0.15 | 0.19 | 0.24 | 0.37 | 0.33 | 0.25 | 0.35 | 0.28 | 0.53 |
| 0.24 | 0.45 | 0.36 | 0.46 | 0.40 | 0.45 | 0.42 | 0.40 | 0.53 |
| 0.27 | 0.45 | 0.25 | 0.36 | 0.31 | 0.33 | 0.36 | 0.40 | 0.42 |
| 0.48 | 0.55 | 0.50 | 0.55 | 0.56 | 0.48 | 0.51 | 0.47 | 0.60 |
| 0.19 | 0.24 | 0.29 | 0.38 | 0.39 | 0.31 | 0.27 | 0.41 | 0.36 |
| 0.33 | 0.52 | 0.34 | 0.49 | 0.42 | 0.44 | 0.43 | 0.42 | 0.54 |

|    |      |      |      |      |      |      |      |      |      |
|----|------|------|------|------|------|------|------|------|------|
| 1  |      |      |      |      |      |      |      |      |      |
| 2  | 0.37 | 0.44 | 0.40 | 0.45 | 0.35 | 0.43 | 0.42 | 0.41 | 0.56 |
| 3  | 0.24 | 0.42 | 0.28 | 0.44 | 0.33 | 0.38 | 0.42 | 0.35 | 0.50 |
| 4  | 0.38 | 0.36 | 0.49 | 0.46 | 0.39 | 0.47 | 0.58 | 0.47 | 0.48 |
| 5  | 0.06 | 0.44 | 0.19 | 0.15 | 0.25 | 0.15 | 0.22 | 0.31 | 0.41 |
| 6  | 0.55 | 0.64 | 0.55 | 0.61 | 0.55 | 0.62 | 0.58 | 0.60 | 0.61 |
| 7  | 0.56 | 0.59 | 0.65 | 0.65 | 0.55 | 0.65 | 0.67 | 0.68 | 0.70 |
| 8  | 0.59 | 0.58 | 0.47 | 0.59 | 0.61 | 0.56 | 0.49 | 0.57 | 0.68 |
| 9  | 0.49 | 0.56 | 0.46 | 0.62 | 0.55 | 0.57 | 0.46 | 0.56 | 0.63 |
| 10 | 0.54 | 0.61 | 0.67 | 0.69 | 0.63 | 0.65 | 0.69 | 0.68 | 0.73 |
| 11 | 0.66 | 0.74 | 0.74 | 0.75 | 0.73 | 0.75 | 0.75 | 0.65 | 0.77 |
| 12 | 0.25 | 0.20 | 0.36 | 0.52 | 0.20 | 0.47 | 0.42 | 0.33 | 0.58 |
| 13 | 0.26 | 0.15 | 0.34 | 0.43 | 0.30 | 0.37 | 0.40 | 0.40 | 0.55 |
| 14 | 0.57 | 0.67 | 0.61 | 0.44 | 0.63 | 0.55 | 0.67 | 0.60 | 0.61 |
| 15 | 0.44 | 0.67 | 0.58 | 0.66 | 0.69 | 0.67 | 0.60 | 0.65 | 0.70 |
| 16 | 0.67 | 0.76 | 0.73 | 0.72 | 0.65 | 0.67 | 0.73 | 0.68 | 0.73 |
| 17 | 0.82 | 0.85 | 0.79 | 0.84 | 0.84 | 0.84 | 0.84 | 0.77 | 0.88 |
| 18 | 0.84 | 0.79 | 0.84 | 0.84 | 0.87 | 0.83 | 0.86 | 0.84 | 0.88 |
| 19 |      |      |      |      |      |      |      |      |      |
| 20 |      |      |      |      |      |      |      |      |      |
| 21 |      |      |      |      |      |      |      |      |      |
| 22 |      |      |      |      |      |      |      |      |      |
| 23 |      |      |      |      |      |      |      |      |      |
| 24 |      |      |      |      |      |      |      |      |      |
| 25 |      |      |      |      |      |      |      |      |      |
| 26 |      |      |      |      |      |      |      |      |      |
| 27 |      |      |      |      |      |      |      |      |      |
| 28 |      |      |      |      |      |      |      |      |      |
| 29 |      |      |      |      |      |      |      |      |      |
| 30 |      |      |      |      |      |      |      |      |      |
| 31 |      |      |      |      |      |      |      |      |      |
| 32 |      |      |      |      |      |      |      |      |      |
| 33 |      |      |      |      |      |      |      |      |      |
| 34 |      |      |      |      |      |      |      |      |      |
| 35 |      |      |      |      |      |      |      |      |      |
| 36 |      |      |      |      |      |      |      |      |      |
| 37 |      |      |      |      |      |      |      |      |      |
| 38 |      |      |      |      |      |      |      |      |      |
| 39 |      |      |      |      |      |      |      |      |      |
| 40 |      |      |      |      |      |      |      |      |      |
| 41 |      |      |      |      |      |      |      |      |      |
| 42 |      |      |      |      |      |      |      |      |      |
| 43 |      |      |      |      |      |      |      |      |      |
| 44 |      |      |      |      |      |      |      |      |      |
| 45 |      |      |      |      |      |      |      |      |      |
| 46 |      |      |      |      |      |      |      |      |      |
| 47 |      |      |      |      |      |      |      |      |      |
| 48 |      |      |      |      |      |      |      |      |      |
| 49 |      |      |      |      |      |      |      |      |      |
| 50 |      |      |      |      |      |      |      |      |      |
| 51 |      |      |      |      |      |      |      |      |      |
| 52 |      |      |      |      |      |      |      |      |      |
| 53 |      |      |      |      |      |      |      |      |      |
| 54 |      |      |      |      |      |      |      |      |      |
| 55 |      |      |      |      |      |      |      |      |      |
| 56 |      |      |      |      |      |      |      |      |      |
| 57 |      |      |      |      |      |      |      |      |      |
| 58 |      |      |      |      |      |      |      |      |      |
| 59 |      |      |      |      |      |      |      |      |      |
| 60 |      |      |      |      |      |      |      |      |      |

1  
2  
3  
4  
5  
6  
7  
8  
9  
10  
11  
12  
13  
14  
15  
16  
17  
18  
19  
20  
21  
22  
23  
24  
25  
26  
27  
28  
29  
30  
31  
32  
33  
34  
35  
36  
37  
38  
39  
40  
41  
42  
43  
44  
45  
46  
47  
48  
49  
50  
51  
52  
53  
54  
55  
56  
57  
58  
59  
60

219 221 241 245 250 251 252 252 259

| RMC  | RLQ  | RLT  | RDZ  | RBK  | RQQ  | RBN  | RDD  | RFS  |
|------|------|------|------|------|------|------|------|------|
| 0.33 | 0.37 | 0.40 | 0.35 | 0.41 | 0.43 | 0.37 | 0.44 | 0.46 |
| 0.37 | 0.38 | 0.41 | 0.37 | 0.43 | 0.43 | 0.39 | 0.42 | 0.43 |
| 0.25 | 0.21 | 0.26 | 0.33 | 0.33 | 0.24 | 0.32 | 0.30 | 0.31 |
| 0.12 | 0.14 | 0.18 | 0.15 | 0.15 | 0.10 | 0.03 | 0.11 | 0.13 |
| 0.25 | 0.25 | 0.24 | 0.33 | 0.29 | 0.23 | 0.30 | 0.25 | 0.28 |
| 0.38 | 0.41 | 0.43 | 0.43 | 0.47 | 0.48 | 0.42 | 0.47 | 0.47 |
| 0.42 | 0.45 | 0.49 | 0.47 | 0.51 | 0.50 | 0.45 | 0.50 | 0.49 |
| 0.23 | 0.31 | 0.41 | 0.29 | 0.43 | 0.42 | 0.29 | 0.40 | 0.38 |
| 0.30 | 0.31 | 0.43 | 0.29 | 0.36 | 0.44 | 0.30 | 0.36 | 0.33 |
| 0.21 | 0.32 | 0.35 | 0.36 | 0.42 | 0.41 | 0.37 | 0.41 | 0.42 |
| 0.27 | 0.29 | 0.25 | 0.31 | 0.36 | 0.31 | 0.37 | 0.36 | 0.35 |
| 0.08 | 0.13 | 0.19 | 0.15 | 0.17 | 0.16 | 0.02 | 0.09 | 0.04 |
| 0.38 | 0.34 | 0.44 | 0.45 | 0.51 | 0.44 | 0.41 | 0.46 | 0.45 |
| 0.50 | 0.54 | 0.55 | 0.52 | 0.58 | 0.57 | 0.56 | 0.58 | 0.56 |
| 0.23 | 0.32 | 0.30 | 0.35 | 0.39 | 0.28 | 0.27 | 0.34 | 0.32 |
| 0.25 | 0.31 | 0.33 | 0.28 | 0.37 | 0.22 | 0.30 | 0.36 | 0.31 |
| 0.41 | 0.48 | 0.51 | 0.49 | 0.57 | 0.52 | 0.50 | 0.54 | 0.52 |
| 0.27 | 0.31 | 0.38 | 0.35 | 0.47 | 0.43 | 0.28 | 0.42 | 0.38 |
| 0.38 | 0.39 | 0.43 | 0.48 | 0.50 | 0.40 | 0.51 | 0.47 | 0.47 |
| 0.45 | 0.53 | 0.56 | 0.54 | 0.59 | 0.57 | 0.57 | 0.58 | 0.59 |
| 0.49 | 0.49 | 0.56 | 0.53 | 0.57 | 0.58 | 0.54 | 0.55 | 0.52 |
| 0.45 | 0.51 | 0.50 | 0.48 | 0.58 | 0.56 | 0.54 | 0.57 | 0.55 |
| 0.09 | 0.18 | 0.09 | 0.16 | 0.14 | 0.20 | 0.09 | 0.12 | 0.22 |
| 0.28 | 0.34 | 0.37 | 0.32 | 0.46 | 0.33 | 0.30 | 0.45 | 0.42 |
| 0.33 | 0.35 | 0.42 | 0.37 | 0.48 | 0.43 | 0.38 | 0.44 | 0.39 |
| 0.53 | 0.57 | 0.61 | 0.62 | 0.62 | 0.58 | 0.61 | 0.61 | 0.62 |
| 0.61 | 0.64 | 0.66 | 0.62 | 0.68 | 0.67 | 0.66 | 0.68 | 0.66 |
| 0.32 | 0.32 | 0.36 | 0.43 | 0.50 | 0.35 | 0.41 | 0.32 | 0.43 |
| 0.20 | 0.27 | 0.28 | 0.36 | 0.51 | 0.47 | 0.19 | 0.33 | 0.28 |
| 0.38 | 0.48 | 0.46 | 0.44 | 0.49 | 0.53 | 0.38 | 0.50 | 0.44 |
| 0.31 | 0.34 | 0.35 | 0.36 | 0.45 | 0.39 | 0.41 | 0.44 | 0.44 |
| 0.38 | 0.53 | 0.57 | 0.47 | 0.61 | 0.52 | 0.48 | 0.56 | 0.53 |
| 0.37 | 0.24 | 0.33 | 0.35 | 0.38 | 0.40 | 0.40 | 0.38 | 0.38 |
| 0.48 | 0.47 | 0.51 | 0.40 | 0.56 | 0.52 | 0.45 | 0.56 | 0.54 |

|    |      |      |      |      |      |      |      |      |      |
|----|------|------|------|------|------|------|------|------|------|
| 1  |      |      |      |      |      |      |      |      |      |
| 2  | 0.30 | 0.35 | 0.34 | 0.30 | 0.53 | 0.45 | 0.32 | 0.47 | 0.44 |
| 3  | 0.38 | 0.45 | 0.33 | 0.37 | 0.51 | 0.45 | 0.41 | 0.46 | 0.49 |
| 4  | 0.47 | 0.44 | 0.47 | 0.50 | 0.46 | 0.51 | 0.52 | 0.54 | 0.55 |
| 5  | 0.31 | 0.35 | 0.36 | 0.26 | 0.34 | 0.26 | 0.29 | 0.46 | 0.31 |
| 6  | 0.62 | 0.52 | 0.64 | 0.67 | 0.68 | 0.61 | 0.66 | 0.67 | 0.68 |
| 7  | 0.66 | 0.67 | 0.65 | 0.69 | 0.68 | 0.71 | 0.70 | 0.70 | 0.73 |
| 8  | 0.41 | 0.57 | 0.46 | 0.51 | 0.69 | 0.62 | 0.60 | 0.49 | 0.55 |
| 9  | 0.42 | 0.58 | 0.49 | 0.53 | 0.66 | 0.49 | 0.52 | 0.63 | 0.51 |
| 10 | 0.66 | 0.66 | 0.71 | 0.66 | 0.74 | 0.72 | 0.69 | 0.70 | 0.69 |
| 11 | 0.65 | 0.77 | 0.79 | 0.65 | 0.79 | 0.79 | 0.79 | 0.79 | 0.79 |
| 12 | 0.33 | 0.42 | 0.29 | 0.29 | 0.52 | 0.42 | 0.36 | 0.49 | 0.39 |
| 13 | 0.21 | 0.34 | 0.30 | 0.21 | 0.57 | 0.40 | 0.26 | 0.43 | 0.40 |
| 14 | 0.56 | 0.66 | 0.61 | 0.58 | 0.68 | 0.68 | 0.67 | 0.66 | 0.76 |
| 15 | 0.59 | 0.69 | 0.68 | 0.63 | 0.75 | 0.73 | 0.57 | 0.76 | 0.69 |
| 16 | 0.74 | 0.69 | 0.74 | 0.79 | 0.78 | 0.76 | 0.81 | 0.79 | 0.77 |
| 17 | 0.82 | 0.85 | 0.85 | 0.85 | 0.88 | 0.86 | 0.83 | 0.84 | 0.88 |
| 18 | 0.84 | 0.89 | 0.90 | 0.87 | 0.90 | 0.89 | 0.82 | 0.84 | 0.88 |
| 19 |      |      |      |      |      |      |      |      |      |
| 20 |      |      |      |      |      |      |      |      |      |
| 21 |      |      |      |      |      |      |      |      |      |
| 22 |      |      |      |      |      |      |      |      |      |
| 23 |      |      |      |      |      |      |      |      |      |
| 24 |      |      |      |      |      |      |      |      |      |
| 25 |      |      |      |      |      |      |      |      |      |
| 26 |      |      |      |      |      |      |      |      |      |
| 27 |      |      |      |      |      |      |      |      |      |
| 28 |      |      |      |      |      |      |      |      |      |
| 29 |      |      |      |      |      |      |      |      |      |
| 30 |      |      |      |      |      |      |      |      |      |
| 31 |      |      |      |      |      |      |      |      |      |
| 32 |      |      |      |      |      |      |      |      |      |
| 33 |      |      |      |      |      |      |      |      |      |
| 34 |      |      |      |      |      |      |      |      |      |
| 35 |      |      |      |      |      |      |      |      |      |
| 36 |      |      |      |      |      |      |      |      |      |
| 37 |      |      |      |      |      |      |      |      |      |
| 38 |      |      |      |      |      |      |      |      |      |
| 39 |      |      |      |      |      |      |      |      |      |
| 40 |      |      |      |      |      |      |      |      |      |
| 41 |      |      |      |      |      |      |      |      |      |
| 42 |      |      |      |      |      |      |      |      |      |
| 43 |      |      |      |      |      |      |      |      |      |
| 44 |      |      |      |      |      |      |      |      |      |
| 45 |      |      |      |      |      |      |      |      |      |
| 46 |      |      |      |      |      |      |      |      |      |
| 47 |      |      |      |      |      |      |      |      |      |
| 48 |      |      |      |      |      |      |      |      |      |
| 49 |      |      |      |      |      |      |      |      |      |
| 50 |      |      |      |      |      |      |      |      |      |
| 51 |      |      |      |      |      |      |      |      |      |
| 52 |      |      |      |      |      |      |      |      |      |
| 53 |      |      |      |      |      |      |      |      |      |
| 54 |      |      |      |      |      |      |      |      |      |
| 55 |      |      |      |      |      |      |      |      |      |
| 56 |      |      |      |      |      |      |      |      |      |
| 57 |      |      |      |      |      |      |      |      |      |
| 58 |      |      |      |      |      |      |      |      |      |
| 59 |      |      |      |      |      |      |      |      |      |
| 60 |      |      |      |      |      |      |      |      |      |

1  
2  
3  
4  
5  
6  
7  
8  
9  
10  
11  
12  
13  
14  
15  
16  
17  
18  
19  
20  
21  
22  
23  
24  
25  
26  
27  
28  
29  
30  
31  
32  
33  
34  
35  
36  
37  
38  
39  
40  
41  
42  
43  
44  
45  
46  
47  
48  
49  
50  
51  
52  
53  
54  
55  
56  
57  
58  
59  
60

261 277 277 279 279 287 288 288 294

| RTK  | RCF  | RWG  | REM  | RJF  | RQW  | RCB  | RF4  | RK5  |
|------|------|------|------|------|------|------|------|------|
| 0.46 | 0.45 | 0.44 | 0.46 | 0.45 | 0.44 | 0.44 | 0.44 | 0.50 |
| 0.44 | 0.45 | 0.44 | 0.46 | 0.46 | 0.46 | 0.46 | 0.45 | 0.47 |
| 0.27 | 0.31 | 0.32 | 0.36 | 0.34 | 0.32 | 0.39 | 0.35 | 0.38 |
| 0.08 | 0.14 | 0.12 | 0.22 | 0.14 | 0.14 | 0.14 | 0.32 | 0.12 |
| 0.29 | 0.28 | 0.34 | 0.34 | 0.30 | 0.28 | 0.35 | 0.34 | 0.39 |
| 0.49 | 0.49 | 0.48 | 0.50 | 0.50 | 0.51 | 0.48 | 0.50 | 0.52 |
| 0.51 | 0.51 | 0.50 | 0.54 | 0.53 | 0.52 | 0.52 | 0.54 | 0.53 |
| 0.41 | 0.44 | 0.43 | 0.42 | 0.39 | 0.43 | 0.35 | 0.40 | 0.48 |
| 0.36 | 0.42 | 0.35 | 0.36 | 0.44 | 0.41 | 0.41 | 0.36 | 0.41 |
| 0.43 | 0.41 | 0.43 | 0.38 | 0.43 | 0.43 | 0.37 | 0.44 | 0.49 |
| 0.37 | 0.38 | 0.42 | 0.39 | 0.43 | 0.40 | 0.42 | 0.38 | 0.41 |
| 0.06 | 0.09 | 0.10 | 0.23 | 0.08 | 0.19 | 0.12 | 0.33 | 0.15 |
| 0.47 | 0.51 | 0.48 | 0.47 | 0.51 | 0.47 | 0.46 | 0.51 | 0.57 |
| 0.59 | 0.60 | 0.59 | 0.60 | 0.60 | 0.61 | 0.55 | 0.60 | 0.62 |
| 0.28 | 0.29 | 0.39 | 0.34 | 0.33 | 0.38 | 0.45 | 0.38 | 0.38 |
| 0.30 | 0.39 | 0.35 | 0.38 | 0.34 | 0.35 | 0.40 | 0.39 | 0.35 |
| 0.60 | 0.57 | 0.56 | 0.57 | 0.58 | 0.55 | 0.54 | 0.61 | 0.62 |
| 0.36 | 0.50 | 0.29 | 0.36 | 0.49 | 0.44 | 0.44 | 0.47 | 0.40 |
| 0.46 | 0.52 | 0.51 | 0.52 | 0.49 | 0.51 | 0.57 | 0.55 | 0.50 |
| 0.60 | 0.56 | 0.60 | 0.63 | 0.62 | 0.62 | 0.58 | 0.60 | 0.64 |
| 0.56 | 0.53 | 0.58 | 0.58 | 0.61 | 0.58 | 0.58 | 0.58 | 0.61 |
| 0.55 | 0.58 | 0.53 | 0.60 | 0.56 | 0.61 | 0.57 | 0.61 | 0.61 |
| 0.12 | 0.18 | 0.12 | 0.26 | 0.09 | 0.14 | 0.16 | 0.16 | 0.28 |
| 0.43 | 0.42 | 0.42 | 0.40 | 0.47 | 0.46 | 0.44 | 0.45 | 0.47 |
| 0.43 | 0.43 | 0.50 | 0.38 | 0.49 | 0.43 | 0.34 | 0.55 | 0.54 |
| 0.62 | 0.64 | 0.62 | 0.62 | 0.61 | 0.64 | 0.66 | 0.65 | 0.63 |
| 0.68 | 0.70 | 0.70 | 0.68 | 0.70 | 0.72 | 0.71 | 0.71 | 0.71 |
| 0.39 | 0.48 | 0.48 | 0.50 | 0.43 | 0.45 | 0.52 | 0.48 | 0.50 |
| 0.39 | 0.51 | 0.31 | 0.33 | 0.43 | 0.45 | 0.39 | 0.45 | 0.37 |
| 0.52 | 0.50 | 0.51 | 0.57 | 0.53 | 0.53 | 0.48 | 0.57 | 0.58 |
| 0.43 | 0.43 | 0.46 | 0.49 | 0.49 | 0.46 | 0.48 | 0.49 | 0.55 |
| 0.60 | 0.52 | 0.62 | 0.59 | 0.61 | 0.61 | 0.59 | 0.65 | 0.54 |
| 0.27 | 0.31 | 0.43 | 0.43 | 0.39 | 0.40 | 0.39 | 0.49 | 0.43 |
| 0.48 | 0.46 | 0.59 | 0.51 | 0.52 | 0.63 | 0.56 | 0.60 | 0.58 |



|    |      |      |      |      |      |      |      |      |      |
|----|------|------|------|------|------|------|------|------|------|
| 1  |      |      |      |      |      |      |      |      |      |
| 2  | 0.51 | 0.44 | 0.41 | 0.50 | 0.46 | 0.52 | 0.45 | 0.59 | 0.58 |
| 3  | 0.45 | 0.49 | 0.43 | 0.38 | 0.58 | 0.53 | 0.45 | 0.58 | 0.53 |
| 4  | 0.49 | 0.57 | 0.54 | 0.59 | 0.52 | 0.49 | 0.54 | 0.54 | 0.45 |
| 5  | 0.48 | 0.38 | 0.44 | 0.39 | 0.36 | 0.48 | 0.19 | 0.40 | 0.41 |
| 6  | 0.66 | 0.71 | 0.72 | 0.74 | 0.70 | 0.72 | 0.77 | 0.72 | 0.74 |
| 7  | 0.67 | 0.73 | 0.71 | 0.74 | 0.73 | 0.73 | 0.71 | 0.73 | 0.70 |
| 8  | 0.64 | 0.61 | 0.69 | 0.62 | 0.59 | 0.64 | 0.62 | 0.63 | 0.70 |
| 9  | 0.63 | 0.52 | 0.62 | 0.62 | 0.67 | 0.69 | 0.66 | 0.70 | 0.69 |
| 10 | 0.68 | 0.71 | 0.69 | 0.76 | 0.75 | 0.73 | 0.70 | 0.76 | 0.74 |
| 11 | 0.81 | 0.78 | 0.81 | 0.80 | 0.77 | 0.82 | 0.81 | 0.82 | 0.80 |
| 12 | 0.33 | 0.29 | 0.42 | 0.51 | 0.37 | 0.53 | 0.25 | 0.63 | 0.45 |
| 13 | 0.48 | 0.30 | 0.52 | 0.37 | 0.43 | 0.57 | 0.43 | 0.41 | 0.37 |
| 14 | 0.70 | 0.74 | 0.69 | 0.70 | 0.67 | 0.66 | 0.66 | 0.61 | 0.75 |
| 15 | 0.76 | 0.73 | 0.67 | 0.77 | 0.79 | 0.77 | 0.71 | 0.81 | 0.81 |
| 16 | 0.76 | 0.78 | 0.81 | 0.82 | 0.79 | 0.81 | 0.84 | 0.83 | 0.77 |
| 17 | 0.86 | 0.90 | 0.89 | 0.89 | 0.90 | 0.89 | 0.87 | 0.89 | 0.90 |
| 18 | 0.87 | 0.91 | 0.84 | 0.89 | 0.91 | 0.91 | 0.91 | 0.90 | 0.89 |
| 19 |      |      |      |      |      |      |      |      |      |
| 20 |      |      |      |      |      |      |      |      |      |
| 21 |      |      |      |      |      |      |      |      |      |
| 22 |      |      |      |      |      |      |      |      |      |
| 23 |      |      |      |      |      |      |      |      |      |
| 24 |      |      |      |      |      |      |      |      |      |
| 25 |      |      |      |      |      |      |      |      |      |
| 26 |      |      |      |      |      |      |      |      |      |
| 27 |      |      |      |      |      |      |      |      |      |
| 28 |      |      |      |      |      |      |      |      |      |
| 29 |      |      |      |      |      |      |      |      |      |
| 30 |      |      |      |      |      |      |      |      |      |
| 31 |      |      |      |      |      |      |      |      |      |
| 32 |      |      |      |      |      |      |      |      |      |
| 33 |      |      |      |      |      |      |      |      |      |
| 34 |      |      |      |      |      |      |      |      |      |
| 35 |      |      |      |      |      |      |      |      |      |
| 36 |      |      |      |      |      |      |      |      |      |
| 37 |      |      |      |      |      |      |      |      |      |
| 38 |      |      |      |      |      |      |      |      |      |
| 39 |      |      |      |      |      |      |      |      |      |
| 40 |      |      |      |      |      |      |      |      |      |
| 41 |      |      |      |      |      |      |      |      |      |
| 42 |      |      |      |      |      |      |      |      |      |
| 43 |      |      |      |      |      |      |      |      |      |
| 44 |      |      |      |      |      |      |      |      |      |
| 45 |      |      |      |      |      |      |      |      |      |
| 46 |      |      |      |      |      |      |      |      |      |
| 47 |      |      |      |      |      |      |      |      |      |
| 48 |      |      |      |      |      |      |      |      |      |
| 49 |      |      |      |      |      |      |      |      |      |
| 50 |      |      |      |      |      |      |      |      |      |
| 51 |      |      |      |      |      |      |      |      |      |
| 52 |      |      |      |      |      |      |      |      |      |
| 53 |      |      |      |      |      |      |      |      |      |
| 54 |      |      |      |      |      |      |      |      |      |
| 55 |      |      |      |      |      |      |      |      |      |
| 56 |      |      |      |      |      |      |      |      |      |
| 57 |      |      |      |      |      |      |      |      |      |
| 58 |      |      |      |      |      |      |      |      |      |
| 59 |      |      |      |      |      |      |      |      |      |
| 60 |      |      |      |      |      |      |      |      |      |

1  
2  
3  
4  
5  
6  
7  
8  
9  
10  
11  
12  
13  
14  
15  
16  
17  
18  
19  
20  
21  
22  
23  
24  
25  
26  
27  
28  
29  
30  
31  
32  
33  
34  
35  
36  
37  
38  
39  
40  
41  
42  
43  
44  
45  
46  
47  
48  
49  
50  
51  
52  
53  
54  
55  
56  
57  
58  
59  
60

298 299 308 309 313 313 320 324 327

| RCD  | RBZ  | RTP  | RWJ  | RC9  | RGP  | RD8  | RBD  | RNQ  |
|------|------|------|------|------|------|------|------|------|
| 0.44 | 0.47 | 0.47 | 0.46 | 0.47 | 0.48 | 0.52 | 0.47 | 0.47 |
| 0.45 | 0.46 | 0.47 | 0.47 | 0.48 | 0.48 | 0.49 | 0.49 | 0.50 |
| 0.30 | 0.32 | 0.27 | 0.40 | 0.32 | 0.34 | 0.33 | 0.32 | 0.36 |
| 0.16 | 0.15 | 0.22 | 0.15 | 0.17 | 0.14 | 0.13 | 0.12 | 0.21 |
| 0.27 | 0.32 | 0.34 | 0.35 | 0.31 | 0.32 | 0.35 | 0.31 | 0.28 |
| 0.48 | 0.49 | 0.51 | 0.52 | 0.50 | 0.53 | 0.54 | 0.53 | 0.52 |
| 0.52 | 0.54 | 0.55 | 0.54 | 0.55 | 0.55 | 0.57 | 0.55 | 0.57 |
| 0.35 | 0.42 | 0.48 | 0.46 | 0.40 | 0.48 | 0.48 | 0.44 | 0.43 |
| 0.38 | 0.47 | 0.39 | 0.48 | 0.43 | 0.47 | 0.43 | 0.45 | 0.42 |
| 0.40 | 0.46 | 0.42 | 0.46 | 0.42 | 0.48 | 0.49 | 0.46 | 0.45 |
| 0.28 | 0.39 | 0.36 | 0.43 | 0.38 | 0.39 | 0.39 | 0.35 | 0.38 |
| 0.16 | 0.16 | 0.14 | 0.12 | 0.09 | 0.15 | 0.13 | 0.13 | 0.22 |
| 0.44 | 0.46 | 0.53 | 0.49 | 0.48 | 0.52 | 0.57 | 0.46 | 0.54 |
| 0.56 | 0.60 | 0.63 | 0.62 | 0.62 | 0.62 | 0.64 | 0.62 | 0.63 |
| 0.30 | 0.31 | 0.30 | 0.49 | 0.35 | 0.35 | 0.36 | 0.36 | 0.36 |
| 0.32 | 0.26 | 0.19 | 0.41 | 0.35 | 0.35 | 0.39 | 0.29 | 0.29 |
| 0.51 | 0.56 | 0.58 | 0.61 | 0.57 | 0.60 | 0.63 | 0.58 | 0.63 |
| 0.38 | 0.50 | 0.47 | 0.25 | 0.45 | 0.48 | 0.57 | 0.44 | 0.51 |
| 0.48 | 0.43 | 0.49 | 0.57 | 0.51 | 0.49 | 0.54 | 0.43 | 0.53 |
| 0.47 | 0.58 | 0.61 | 0.60 | 0.64 | 0.63 | 0.67 | 0.64 | 0.63 |
| 0.60 | 0.62 | 0.61 | 0.61 | 0.61 | 0.61 | 0.64 | 0.62 | 0.62 |
| 0.50 | 0.56 | 0.61 | 0.56 | 0.60 | 0.59 | 0.64 | 0.60 | 0.64 |
| 0.06 | 0.18 | 0.16 | 0.22 | 0.18 | 0.14 | 0.33 | 0.14 | 0.14 |
| 0.39 | 0.42 | 0.40 | 0.52 | 0.43 | 0.47 | 0.47 | 0.44 | 0.44 |
| 0.38 | 0.38 | 0.51 | 0.41 | 0.52 | 0.53 | 0.51 | 0.44 | 0.58 |
| 0.66 | 0.62 | 0.64 | 0.65 | 0.69 | 0.66 | 0.64 | 0.66 | 0.66 |
| 0.69 | 0.69 | 0.72 | 0.72 | 0.73 | 0.72 | 0.74 | 0.73 | 0.74 |
| 0.41 | 0.39 | 0.42 | 0.50 | 0.46 | 0.43 | 0.46 | 0.41 | 0.43 |
| 0.31 | 0.46 | 0.40 | 0.25 | 0.32 | 0.48 | 0.54 | 0.41 | 0.43 |
| 0.34 | 0.52 | 0.56 | 0.56 | 0.52 | 0.57 | 0.59 | 0.54 | 0.59 |
| 0.33 | 0.47 | 0.36 | 0.50 | 0.45 | 0.53 | 0.52 | 0.47 | 0.47 |
| 0.53 | 0.59 | 0.65 | 0.59 | 0.64 | 0.65 | 0.66 | 0.65 | 0.68 |
| 0.33 | 0.19 | 0.39 | 0.33 | 0.35 | 0.46 | 0.47 | 0.22 | 0.43 |
| 0.47 | 0.59 | 0.47 | 0.63 | 0.60 | 0.62 | 0.61 | 0.54 | 0.61 |

|    |      |      |      |      |      |      |      |      |      |
|----|------|------|------|------|------|------|------|------|------|
| 1  |      |      |      |      |      |      |      |      |      |
| 2  | 0.46 | 0.49 | 0.61 | 0.52 | 0.60 | 0.47 | 0.56 | 0.48 | 0.61 |
| 3  | 0.33 | 0.45 | 0.44 | 0.47 | 0.49 | 0.49 | 0.64 | 0.57 | 0.54 |
| 4  | 0.53 | 0.55 | 0.49 | 0.60 | 0.63 | 0.55 | 0.52 | 0.58 | 0.53 |
| 5  | 0.26 | 0.32 | 0.31 | 0.46 | 0.40 | 0.36 | 0.45 | 0.19 | 0.47 |
| 6  | 0.66 | 0.70 | 0.66 | 0.76 | 0.71 | 0.73 | 0.73 | 0.69 | 0.73 |
| 7  | 0.71 | 0.70 | 0.73 | 0.75 | 0.75 | 0.74 | 0.70 | 0.75 | 0.73 |
| 8  | 0.34 | 0.51 | 0.73 | 0.67 | 0.64 | 0.60 | 0.73 | 0.69 | 0.77 |
| 9  | 0.56 | 0.45 | 0.73 | 0.70 | 0.70 | 0.52 | 0.72 | 0.62 | 0.76 |
| 10 | 0.59 | 0.71 | 0.72 | 0.71 | 0.74 | 0.77 | 0.76 | 0.76 | 0.76 |
| 11 | 0.80 | 0.80 | 0.73 | 0.84 | 0.81 | 0.83 | 0.83 | 0.82 | 0.83 |
| 12 | 0.37 | 0.37 | 0.40 | 0.53 | 0.49 | 0.54 | 0.51 | 0.59 | 0.60 |
| 13 | 0.15 | 0.37 | 0.48 | 0.48 | 0.60 | 0.52 | 0.50 | 0.43 | 0.69 |
| 14 | 0.47 | 0.67 | 0.68 | 0.66 | 0.45 | 0.74 | 0.79 | 0.70 | 0.74 |
| 15 | 0.63 | 0.75 | 0.65 | 0.78 | 0.75 | 0.75 | 0.81 | 0.70 | 0.84 |
| 16 | 0.72 | 0.70 | 0.80 | 0.85 | 0.82 | 0.81 | 0.82 | 0.78 | 0.79 |
| 17 | 0.84 | 0.89 | 0.90 | 0.88 | 0.90 | 0.88 | 0.90 | 0.88 | 0.91 |
| 18 | 0.91 | 0.91 | 0.91 | 0.88 | 0.91 | 0.85 | 0.92 | 0.91 | 0.89 |
| 19 |      |      |      |      |      |      |      |      |      |
| 20 |      |      |      |      |      |      |      |      |      |
| 21 |      |      |      |      |      |      |      |      |      |
| 22 |      |      |      |      |      |      |      |      |      |
| 23 |      |      |      |      |      |      |      |      |      |
| 24 |      |      |      |      |      |      |      |      |      |
| 25 |      |      |      |      |      |      |      |      |      |
| 26 |      |      |      |      |      |      |      |      |      |
| 27 |      |      |      |      |      |      |      |      |      |
| 28 |      |      |      |      |      |      |      |      |      |
| 29 |      |      |      |      |      |      |      |      |      |
| 30 |      |      |      |      |      |      |      |      |      |
| 31 |      |      |      |      |      |      |      |      |      |
| 32 |      |      |      |      |      |      |      |      |      |
| 33 |      |      |      |      |      |      |      |      |      |
| 34 |      |      |      |      |      |      |      |      |      |
| 35 |      |      |      |      |      |      |      |      |      |
| 36 |      |      |      |      |      |      |      |      |      |
| 37 |      |      |      |      |      |      |      |      |      |
| 38 |      |      |      |      |      |      |      |      |      |
| 39 |      |      |      |      |      |      |      |      |      |
| 40 |      |      |      |      |      |      |      |      |      |
| 41 |      |      |      |      |      |      |      |      |      |
| 42 |      |      |      |      |      |      |      |      |      |
| 43 |      |      |      |      |      |      |      |      |      |
| 44 |      |      |      |      |      |      |      |      |      |
| 45 |      |      |      |      |      |      |      |      |      |
| 46 |      |      |      |      |      |      |      |      |      |
| 47 |      |      |      |      |      |      |      |      |      |
| 48 |      |      |      |      |      |      |      |      |      |
| 49 |      |      |      |      |      |      |      |      |      |
| 50 |      |      |      |      |      |      |      |      |      |
| 51 |      |      |      |      |      |      |      |      |      |
| 52 |      |      |      |      |      |      |      |      |      |
| 53 |      |      |      |      |      |      |      |      |      |
| 54 |      |      |      |      |      |      |      |      |      |
| 55 |      |      |      |      |      |      |      |      |      |
| 56 |      |      |      |      |      |      |      |      |      |
| 57 |      |      |      |      |      |      |      |      |      |
| 58 |      |      |      |      |      |      |      |      |      |
| 59 |      |      |      |      |      |      |      |      |      |
| 60 |      |      |      |      |      |      |      |      |      |

1  
2  
3  
4  
5  
6  
7  
8  
9  
10  
11  
12  
13  
14  
15  
16  
17  
18  
19  
20  
21  
22  
23  
24  
25  
26  
27  
28  
29  
30  
31  
32  
33  
34  
35  
36  
37  
38  
39  
40  
41  
42  
43  
44  
45  
46  
47  
48  
49  
50  
51  
52  
53  
54  
55  
56  
57  
58  
59  
60

344 350 350 352 374 384 387 395 396

| RP5  | RVJ  | RW3  | RJC  | RAE  | RBL  | RGR  | RQ6  | R1K  |
|------|------|------|------|------|------|------|------|------|
| 0.50 | 0.46 | 0.53 | 0.47 | 0.54 | 0.52 | 0.53 | 0.55 | 0.54 |
| 0.51 | 0.52 | 0.52 | 0.50 | 0.53 | 0.51 | 0.52 | 0.54 | 0.53 |
| 0.37 | 0.41 | 0.41 | 0.33 | 0.44 | 0.40 | 0.37 | 0.41 | 0.40 |
| 0.15 | 0.25 | 0.13 | 0.19 | 0.17 | 0.24 | 0.20 | 0.26 | 0.19 |
| 0.33 | 0.47 | 0.35 | 0.26 | 0.44 | 0.36 | 0.32 | 0.31 | 0.40 |
| 0.56 | 0.55 | 0.53 | 0.52 | 0.58 | 0.55 | 0.56 | 0.55 | 0.59 |
| 0.57 | 0.58 | 0.56 | 0.59 | 0.60 | 0.58 | 0.60 | 0.61 | 0.61 |
| 0.46 | 0.44 | 0.45 | 0.46 | 0.52 | 0.49 | 0.51 | 0.47 | 0.47 |
| 0.47 | 0.47 | 0.52 | 0.43 | 0.47 | 0.48 | 0.45 | 0.52 | 0.53 |
| 0.49 | 0.47 | 0.45 | 0.45 | 0.49 | 0.50 | 0.45 | 0.48 | 0.54 |
| 0.43 | 0.45 | 0.43 | 0.32 | 0.52 | 0.43 | 0.42 | 0.43 | 0.45 |
| 0.16 | 0.24 | 0.11 | 0.17 | 0.11 | 0.22 | 0.16 | 0.24 | 0.16 |
| 0.55 | 0.54 | 0.50 | 0.49 | 0.59 | 0.52 | 0.54 | 0.47 | 0.58 |
| 0.65 | 0.66 | 0.64 | 0.65 | 0.68 | 0.66 | 0.67 | 0.66 | 0.67 |
| 0.41 | 0.28 | 0.42 | 0.35 | 0.56 | 0.44 | 0.41 | 0.41 | 0.43 |
| 0.43 | 0.42 | 0.47 | 0.25 | 0.52 | 0.38 | 0.33 | 0.39 | 0.39 |
| 0.64 | 0.57 | 0.59 | 0.60 | 0.67 | 0.64 | 0.62 | 0.63 | 0.68 |
| 0.43 | 0.32 | 0.40 | 0.53 | 0.50 | 0.42 | 0.53 | 0.35 | 0.54 |
| 0.54 | 0.57 | 0.60 | 0.48 | 0.63 | 0.56 | 0.52 | 0.54 | 0.54 |
| 0.66 | 0.65 | 0.65 | 0.64 | 0.70 | 0.68 | 0.67 | 0.69 | 0.68 |
| 0.63 | 0.65 | 0.64 | 0.59 | 0.65 | 0.65 | 0.65 | 0.65 | 0.67 |
| 0.62 | 0.62 | 0.62 | 0.63 | 0.68 | 0.66 | 0.66 | 0.65 | 0.67 |
| 0.16 | 0.28 | 0.12 | 0.18 | 0.31 | 0.16 | 0.28 | 0.16 | 0.29 |
| 0.54 | 0.51 | 0.54 | 0.43 | 0.62 | 0.47 | 0.41 | 0.38 | 0.50 |
| 0.53 | 0.59 | 0.49 | 0.48 | 0.52 | 0.59 | 0.58 | 0.54 | 0.59 |
| 0.67 | 0.71 | 0.69 | 0.70 | 0.70 | 0.70 | 0.71 | 0.73 | 0.71 |
| 0.75 | 0.74 | 0.75 | 0.73 | 0.77 | 0.75 | 0.74 | 0.76 | 0.77 |
| 0.50 | 0.54 | 0.52 | 0.26 | 0.61 | 0.54 | 0.40 | 0.42 | 0.50 |
| 0.48 | 0.32 | 0.34 | 0.46 | 0.48 | 0.43 | 0.51 | 0.32 | 0.54 |
| 0.57 | 0.51 | 0.57 | 0.49 | 0.64 | 0.54 | 0.58 | 0.55 | 0.60 |
| 0.53 | 0.43 | 0.59 | 0.50 | 0.60 | 0.53 | 0.44 | 0.44 | 0.58 |
| 0.68 | 0.68 | 0.67 | 0.66 | 0.67 | 0.67 | 0.67 | 0.70 | 0.73 |
| 0.48 | 0.52 | 0.42 | 0.27 | 0.53 | 0.46 | 0.46 | 0.42 | 0.57 |
| 0.59 | 0.57 | 0.67 | 0.53 | 0.71 | 0.59 | 0.55 | 0.59 | 0.67 |

|    |      |      |      |      |      |      |      |      |      |
|----|------|------|------|------|------|------|------|------|------|
| 1  |      |      |      |      |      |      |      |      |      |
| 2  | 0.62 | 0.53 | 0.56 | 0.41 | 0.63 | 0.53 | 0.54 | 0.57 | 0.63 |
| 3  | 0.57 | 0.61 | 0.55 | 0.52 | 0.59 | 0.59 | 0.58 | 0.56 | 0.62 |
| 4  | 0.61 | 0.60 | 0.62 | 0.53 | 0.64 | 0.60 | 0.57 | 0.65 | 0.67 |
| 5  | 0.49 | 0.51 | 0.51 | 0.44 | 0.50 | 0.48 | 0.43 | 0.37 | 0.46 |
| 6  | 0.76 | 0.76 | 0.77 | 0.70 | 0.80 | 0.75 | 0.73 | 0.73 | 0.74 |
| 7  | 0.79 | 0.73 | 0.78 | 0.71 | 0.79 | 0.76 | 0.74 | 0.78 | 0.79 |
| 8  | 0.77 | 0.76 | 0.71 | 0.60 | 0.76 | 0.71 | 0.66 | 0.57 | 0.76 |
| 9  | 0.75 | 0.74 | 0.71 | 0.45 | 0.71 | 0.67 | 0.72 | 0.72 | 0.74 |
| 10 | 0.78 | 0.74 | 0.78 | 0.74 | 0.81 | 0.77 | 0.76 | 0.81 | 0.81 |
| 11 | 0.83 | 0.85 | 0.83 | 0.85 | 0.82 | 0.79 | 0.86 | 0.86 | 0.85 |
| 12 | 0.63 | 0.51 | 0.59 | 0.47 | 0.58 | 0.53 | 0.47 | 0.33 | 0.55 |
| 13 | 0.58 | 0.57 | 0.48 | 0.46 | 0.60 | 0.59 | 0.34 | 0.46 | 0.50 |
| 14 | 0.75 | 0.64 | 0.68 | 0.77 | 0.82 | 0.75 | 0.80 | 0.74 | 0.77 |
| 15 | 0.75 | 0.73 | 0.79 | 0.70 | 0.82 | 0.78 | 0.80 | 0.78 | 0.83 |
| 16 | 0.80 | 0.84 | 0.84 | 0.78 | 0.86 | 0.84 | 0.84 | 0.83 | 0.85 |
| 17 | 0.90 | 0.89 | 0.91 | 0.83 | 0.92 | 0.90 | 0.92 | 0.91 | 0.92 |
| 18 | 0.90 | 0.93 | 0.93 | 0.92 | 0.93 | 0.92 | 0.93 | 0.94 | 0.93 |
| 19 |      |      |      |      |      |      |      |      |      |
| 20 |      |      |      |      |      |      |      |      |      |
| 21 |      |      |      |      |      |      |      |      |      |
| 22 |      |      |      |      |      |      |      |      |      |
| 23 |      |      |      |      |      |      |      |      |      |
| 24 |      |      |      |      |      |      |      |      |      |
| 25 |      |      |      |      |      |      |      |      |      |
| 26 |      |      |      |      |      |      |      |      |      |
| 27 |      |      |      |      |      |      |      |      |      |
| 28 |      |      |      |      |      |      |      |      |      |
| 29 |      |      |      |      |      |      |      |      |      |
| 30 |      |      |      |      |      |      |      |      |      |
| 31 |      |      |      |      |      |      |      |      |      |
| 32 |      |      |      |      |      |      |      |      |      |
| 33 |      |      |      |      |      |      |      |      |      |
| 34 |      |      |      |      |      |      |      |      |      |
| 35 |      |      |      |      |      |      |      |      |      |
| 36 |      |      |      |      |      |      |      |      |      |
| 37 |      |      |      |      |      |      |      |      |      |
| 38 |      |      |      |      |      |      |      |      |      |
| 39 |      |      |      |      |      |      |      |      |      |
| 40 |      |      |      |      |      |      |      |      |      |
| 41 |      |      |      |      |      |      |      |      |      |
| 42 |      |      |      |      |      |      |      |      |      |
| 43 |      |      |      |      |      |      |      |      |      |
| 44 |      |      |      |      |      |      |      |      |      |
| 45 |      |      |      |      |      |      |      |      |      |
| 46 |      |      |      |      |      |      |      |      |      |
| 47 |      |      |      |      |      |      |      |      |      |
| 48 |      |      |      |      |      |      |      |      |      |
| 49 |      |      |      |      |      |      |      |      |      |
| 50 |      |      |      |      |      |      |      |      |      |
| 51 |      |      |      |      |      |      |      |      |      |
| 52 |      |      |      |      |      |      |      |      |      |
| 53 |      |      |      |      |      |      |      |      |      |
| 54 |      |      |      |      |      |      |      |      |      |
| 55 |      |      |      |      |      |      |      |      |      |
| 56 |      |      |      |      |      |      |      |      |      |
| 57 |      |      |      |      |      |      |      |      |      |
| 58 |      |      |      |      |      |      |      |      |      |
| 59 |      |      |      |      |      |      |      |      |      |
| 60 |      |      |      |      |      |      |      |      |      |

1  
2  
3  
4  
5  
6  
7  
8  
9  
10  
11  
12  
13  
14  
15  
16  
17  
18  
19  
20  
21  
22  
23  
24  
25  
26  
27  
28  
29  
30  
31  
32  
33  
34  
35  
36  
37  
38  
39  
40  
41  
42  
43  
44  
45  
46  
47  
48  
49  
50  
51  
52  
53  
54  
55  
56  
57  
58  
59  
60

397 404 409 412 415 423 430 430 437

| RN7  | RHW  | RNL  | RCX  | RPA  | RWH  | RM2  | RR7  | RNS  |
|------|------|------|------|------|------|------|------|------|
| 0.52 | 0.53 | 0.56 | 0.52 | 0.55 | 0.56 | 0.51 | 0.55 | 0.58 |
| 0.53 | 0.54 | 0.55 | 0.54 | 0.57 | 0.56 | 0.56 | 0.56 | 0.56 |
| 0.38 | 0.42 | 0.39 | 0.42 | 0.42 | 0.46 | 0.49 | 0.41 | 0.45 |
| 0.18 | 0.43 | 0.28 | 0.17 | 0.22 | 0.34 | 0.22 | 0.28 | 0.30 |
| 0.33 | 0.38 | 0.38 | 0.33 | 0.41 | 0.41 | 0.40 | 0.36 | 0.41 |
| 0.52 | 0.54 | 0.59 | 0.57 | 0.57 | 0.60 | 0.56 | 0.53 | 0.57 |
| 0.60 | 0.62 | 0.62 | 0.60 | 0.63 | 0.63 | 0.61 | 0.62 | 0.64 |
| 0.48 | 0.54 | 0.50 | 0.43 | 0.52 | 0.56 | 0.49 | 0.45 | 0.54 |
| 0.49 | 0.45 | 0.48 | 0.52 | 0.52 | 0.55 | 0.43 | 0.43 | 0.54 |
| 0.45 | 0.52 | 0.58 | 0.50 | 0.51 | 0.55 | 0.45 | 0.44 | 0.53 |
| 0.42 | 0.50 | 0.45 | 0.40 | 0.50 | 0.51 | 0.52 | 0.42 | 0.53 |
| 0.11 | 0.40 | 0.31 | 0.18 | 0.22 | 0.36 | 0.20 | 0.18 | 0.30 |
| 0.54 | 0.61 | 0.60 | 0.58 | 0.60 | 0.62 | 0.54 | 0.54 | 0.62 |
| 0.63 | 0.69 | 0.70 | 0.67 | 0.70 | 0.70 | 0.68 | 0.63 | 0.69 |
| 0.47 | 0.43 | 0.46 | 0.48 | 0.51 | 0.52 | 0.54 | 0.37 | 0.51 |
| 0.35 | 0.35 | 0.38 | 0.45 | 0.55 | 0.45 | 0.49 | 0.32 | 0.47 |
| 0.56 | 0.66 | 0.68 | 0.63 | 0.67 | 0.68 | 0.64 | 0.60 | 0.66 |
| 0.50 | 0.51 | 0.58 | 0.53 | 0.55 | 0.55 | 0.43 | 0.50 | 0.62 |
| 0.55 | 0.59 | 0.49 | 0.57 | 0.62 | 0.62 | 0.67 | 0.50 | 0.62 |
| 0.64 | 0.68 | 0.71 | 0.66 | 0.68 | 0.72 | 0.70 | 0.68 | 0.69 |
| 0.67 | 0.68 | 0.69 | 0.62 | 0.68 | 0.70 | 0.70 | 0.71 | 0.70 |
| 0.63 | 0.69 | 0.71 | 0.65 | 0.69 | 0.70 | 0.64 | 0.63 | 0.69 |
| 0.18 | 0.21 | 0.27 | 0.28 | 0.16 | 0.24 | 0.21 | 0.12 | 0.33 |
| 0.47 | 0.58 | 0.56 | 0.53 | 0.59 | 0.54 | 0.52 | 0.44 | 0.58 |
| 0.56 | 0.60 | 0.59 | 0.56 | 0.62 | 0.65 | 0.54 | 0.46 | 0.64 |
| 0.72 | 0.69 | 0.73 | 0.72 | 0.71 | 0.71 | 0.72 | 0.74 | 0.72 |
| 0.76 | 0.78 | 0.78 | 0.76 | 0.78 | 0.79 | 0.78 | 0.76 | 0.79 |
| 0.47 | 0.46 | 0.42 | 0.52 | 0.55 | 0.60 | 0.58 | 0.48 | 0.55 |
| 0.41 | 0.45 | 0.60 | 0.50 | 0.54 | 0.54 | 0.36 | 0.44 | 0.57 |
| 0.51 | 0.61 | 0.65 | 0.59 | 0.63 | 0.63 | 0.63 | 0.58 | 0.65 |
| 0.46 | 0.48 | 0.55 | 0.52 | 0.58 | 0.65 | 0.61 | 0.45 | 0.64 |
| 0.72 | 0.72 | 0.68 | 0.69 | 0.72 | 0.74 | 0.64 | 0.58 | 0.73 |
| 0.40 | 0.62 | 0.48 | 0.47 | 0.58 | 0.58 | 0.47 | 0.29 | 0.57 |
| 0.58 | 0.62 | 0.54 | 0.62 | 0.69 | 0.69 | 0.68 | 0.60 | 0.70 |

|    |      |      |      |      |      |      |      |      |      |
|----|------|------|------|------|------|------|------|------|------|
| 1  |      |      |      |      |      |      |      |      |      |
| 2  | 0.56 | 0.62 | 0.62 | 0.55 | 0.63 | 0.62 | 0.61 | 0.53 | 0.63 |
| 3  | 0.47 | 0.62 | 0.61 | 0.55 | 0.53 | 0.61 | 0.66 | 0.60 | 0.59 |
| 4  | 0.61 | 0.64 | 0.60 | 0.59 | 0.60 | 0.64 | 0.69 | 0.64 | 0.67 |
| 5  | 0.34 | 0.39 | 0.46 | 0.47 | 0.54 | 0.60 | 0.54 | 0.29 | 0.46 |
| 6  | 0.74 | 0.76 | 0.76 | 0.76 | 0.80 | 0.79 | 0.83 | 0.72 | 0.79 |
| 7  | 0.78 | 0.79 | 0.77 | 0.79 | 0.79 | 0.78 | 0.81 | 0.78 | 0.82 |
| 8  | 0.69 | 0.79 | 0.83 | 0.76 | 0.73 | 0.79 | 0.76 | 0.67 | 0.78 |
| 9  | 0.70 | 0.77 | 0.76 | 0.67 | 0.74 | 0.77 | 0.71 | 0.67 | 0.77 |
| 10 | 0.78 | 0.77 | 0.80 | 0.80 | 0.80 | 0.81 | 0.82 | 0.80 | 0.80 |
| 11 | 0.84 | 0.85 | 0.85 | 0.85 | 0.87 | 0.87 | 0.86 | 0.82 | 0.85 |
| 12 | 0.56 | 0.64 | 0.51 | 0.62 | 0.57 | 0.53 | 0.65 | 0.45 | 0.64 |
| 13 | 0.68 | 0.57 | 0.73 | 0.52 | 0.56 | 0.65 | 0.51 | 0.54 | 0.70 |
| 14 | 0.74 | 0.62 | 0.82 | 0.81 | 0.77 | 0.81 | 0.74 | 0.66 | 0.72 |
| 15 | 0.77 | 0.82 | 0.85 | 0.80 | 0.83 | 0.78 | 0.79 | 0.81 | 0.83 |
| 16 | 0.84 | 0.87 | 0.80 | 0.83 | 0.88 | 0.88 | 0.89 | 0.85 | 0.86 |
| 17 | 0.90 | 0.92 | 0.92 | 0.91 | 0.92 | 0.93 | 0.92 | 0.91 | 0.93 |
| 18 | 0.93 | 0.91 | 0.91 | 0.93 | 0.93 | 0.93 | 0.95 | 0.92 | 0.93 |
| 19 |      |      |      |      |      |      |      |      |      |
| 20 |      |      |      |      |      |      |      |      |      |
| 21 |      |      |      |      |      |      |      |      |      |
| 22 |      |      |      |      |      |      |      |      |      |
| 23 |      |      |      |      |      |      |      |      |      |
| 24 |      |      |      |      |      |      |      |      |      |
| 25 |      |      |      |      |      |      |      |      |      |
| 26 |      |      |      |      |      |      |      |      |      |
| 27 |      |      |      |      |      |      |      |      |      |
| 28 |      |      |      |      |      |      |      |      |      |
| 29 |      |      |      |      |      |      |      |      |      |
| 30 |      |      |      |      |      |      |      |      |      |
| 31 |      |      |      |      |      |      |      |      |      |
| 32 |      |      |      |      |      |      |      |      |      |
| 33 |      |      |      |      |      |      |      |      |      |
| 34 |      |      |      |      |      |      |      |      |      |
| 35 |      |      |      |      |      |      |      |      |      |
| 36 |      |      |      |      |      |      |      |      |      |
| 37 |      |      |      |      |      |      |      |      |      |
| 38 |      |      |      |      |      |      |      |      |      |
| 39 |      |      |      |      |      |      |      |      |      |
| 40 |      |      |      |      |      |      |      |      |      |
| 41 |      |      |      |      |      |      |      |      |      |
| 42 |      |      |      |      |      |      |      |      |      |
| 43 |      |      |      |      |      |      |      |      |      |
| 44 |      |      |      |      |      |      |      |      |      |
| 45 |      |      |      |      |      |      |      |      |      |
| 46 |      |      |      |      |      |      |      |      |      |
| 47 |      |      |      |      |      |      |      |      |      |
| 48 |      |      |      |      |      |      |      |      |      |
| 49 |      |      |      |      |      |      |      |      |      |
| 50 |      |      |      |      |      |      |      |      |      |
| 51 |      |      |      |      |      |      |      |      |      |
| 52 |      |      |      |      |      |      |      |      |      |
| 53 |      |      |      |      |      |      |      |      |      |
| 54 |      |      |      |      |      |      |      |      |      |
| 55 |      |      |      |      |      |      |      |      |      |
| 56 |      |      |      |      |      |      |      |      |      |
| 57 |      |      |      |      |      |      |      |      |      |
| 58 |      |      |      |      |      |      |      |      |      |
| 59 |      |      |      |      |      |      |      |      |      |
| 60 |      |      |      |      |      |      |      |      |      |

1  
2  
3  
4  
5  
6  
7  
8  
9  
10  
11  
12  
13  
14  
15  
16  
17  
18  
19  
20  
21  
22  
23  
24  
25  
26  
27  
28  
29  
30  
31  
32  
33  
34  
35  
36  
37  
38  
39  
40  
41  
42  
43  
44  
45  
46  
47  
48  
49  
50  
51  
52  
53  
54  
55  
56  
57  
58  
59  
60

438 439 443 448 451 467 470 484 496

| RN3  | RGN  | RVW  | RNZ  | RDE  | RLN  | RWY  | RGQ  | RXP  |
|------|------|------|------|------|------|------|------|------|
| 0.55 | 0.54 | 0.54 | 0.55 | 0.55 | 0.58 | 0.58 | 0.61 | 0.59 |
| 0.58 | 0.55 | 0.57 | 0.55 | 0.57 | 0.59 | 0.57 | 0.58 | 0.60 |
| 0.44 | 0.44 | 0.45 | 0.40 | 0.44 | 0.42 | 0.41 | 0.43 | 0.46 |
| 0.22 | 0.26 | 0.24 | 0.20 | 0.28 | 0.22 | 0.23 | 0.32 | 0.21 |
| 0.40 | 0.38 | 0.36 | 0.38 | 0.36 | 0.36 | 0.43 | 0.37 | 0.41 |
| 0.58 | 0.57 | 0.55 | 0.60 | 0.57 | 0.59 | 0.60 | 0.63 | 0.63 |
| 0.64 | 0.61 | 0.62 | 0.63 | 0.64 | 0.64 | 0.66 | 0.65 | 0.66 |
| 0.51 | 0.50 | 0.47 | 0.55 | 0.51 | 0.54 | 0.55 | 0.57 | 0.59 |
| 0.49 | 0.51 | 0.50 | 0.51 | 0.53 | 0.58 | 0.53 | 0.55 | 0.56 |
| 0.53 | 0.51 | 0.47 | 0.49 | 0.54 | 0.55 | 0.54 | 0.53 | 0.58 |
| 0.51 | 0.49 | 0.45 | 0.42 | 0.48 | 0.46 | 0.48 | 0.47 | 0.50 |
| 0.22 | 0.21 | 0.18 | 0.16 | 0.21 | 0.19 | 0.16 | 0.22 | 0.25 |
| 0.59 | 0.58 | 0.55 | 0.54 | 0.59 | 0.61 | 0.62 | 0.58 | 0.60 |
| 0.70 | 0.68 | 0.66 | 0.70 | 0.68 | 0.68 | 0.72 | 0.71 | 0.73 |
| 0.47 | 0.36 | 0.45 | 0.44 | 0.41 | 0.49 | 0.50 | 0.43 | 0.49 |
| 0.46 | 0.41 | 0.46 | 0.40 | 0.42 | 0.41 | 0.43 | 0.41 | 0.48 |
| 0.64 | 0.64 | 0.59 | 0.65 | 0.66 | 0.68 | 0.69 | 0.68 | 0.71 |
| 0.63 | 0.53 | 0.58 | 0.51 | 0.57 | 0.53 | 0.60 | 0.60 | 0.61 |
| 0.64 | 0.57 | 0.60 | 0.56 | 0.61 | 0.57 | 0.60 | 0.61 | 0.63 |
| 0.67 | 0.68 | 0.69 | 0.70 | 0.67 | 0.73 | 0.71 | 0.74 | 0.74 |
| 0.69 | 0.67 | 0.68 | 0.67 | 0.70 | 0.72 | 0.69 | 0.69 | 0.72 |
| 0.70 | 0.70 | 0.65 | 0.63 | 0.67 | 0.68 | 0.69 | 0.68 | 0.71 |
| 0.21 | 0.21 | 0.21 | 0.19 | 0.23 | 0.29 | 0.24 | 0.19 | 0.28 |
| 0.57 | 0.56 | 0.56 | 0.46 | 0.58 | 0.49 | 0.58 | 0.53 | 0.64 |
| 0.62 | 0.58 | 0.53 | 0.48 | 0.60 | 0.54 | 0.58 | 0.61 | 0.60 |
| 0.71 | 0.75 | 0.74 | 0.75 | 0.73 | 0.76 | 0.76 | 0.76 | 0.76 |
| 0.79 | 0.78 | 0.76 | 0.78 | 0.79 | 0.78 | 0.80 | 0.80 | 0.81 |
| 0.61 | 0.55 | 0.56 | 0.56 | 0.56 | 0.57 | 0.49 | 0.52 | 0.54 |
| 0.59 | 0.51 | 0.48 | 0.47 | 0.52 | 0.53 | 0.58 | 0.60 | 0.58 |
| 0.66 | 0.59 | 0.56 | 0.63 | 0.63 | 0.66 | 0.67 | 0.57 | 0.66 |
| 0.58 | 0.49 | 0.58 | 0.47 | 0.48 | 0.54 | 0.54 | 0.54 | 0.58 |
| 0.75 | 0.70 | 0.66 | 0.69 | 0.75 | 0.72 | 0.73 | 0.73 | 0.74 |
| 0.50 | 0.42 | 0.47 | 0.41 | 0.49 | 0.54 | 0.49 | 0.42 | 0.51 |
| 0.66 | 0.68 | 0.62 | 0.57 | 0.64 | 0.67 | 0.60 | 0.57 | 0.71 |



|    |      |      |      |      |      |      |      |      |      |
|----|------|------|------|------|------|------|------|------|------|
| 1  |      |      |      |      |      |      |      |      |      |
| 2  | 0.57 | 0.51 | 0.55 | 0.54 | 0.56 | 0.62 | 0.68 | 0.60 | 0.67 |
| 3  | 0.68 | 0.37 | 0.62 | 0.53 | 0.61 | 0.64 | 0.62 | 0.58 | 0.64 |
| 4  | 0.60 | 0.60 | 0.64 | 0.62 | 0.65 | 0.69 | 0.66 | 0.63 | 0.71 |
| 5  | 0.43 | 0.37 | 0.52 | 0.29 | 0.43 | 0.52 | 0.37 | 0.43 | 0.51 |
| 6  | 0.82 | 0.78 | 0.79 | 0.76 | 0.78 | 0.77 | 0.79 | 0.79 | 0.81 |
| 7  | 0.81 | 0.76 | 0.79 | 0.79 | 0.80 | 0.84 | 0.81 | 0.80 | 0.83 |
| 8  | 0.77 | 0.71 | 0.67 | 0.70 | 0.75 | 0.72 | 0.69 | 0.76 | 0.77 |
| 9  | 0.78 | 0.73 | 0.59 | 0.73 | 0.76 | 0.74 | 0.77 | 0.81 | 0.74 |
| 10 | 0.81 | 0.77 | 0.82 | 0.78 | 0.80 | 0.85 | 0.82 | 0.79 | 0.84 |
| 11 | 0.86 | 0.86 | 0.80 | 0.87 | 0.86 | 0.86 | 0.87 | 0.88 | 0.89 |
| 12 | 0.45 | 0.40 | 0.53 | 0.58 | 0.50 | 0.52 | 0.57 | 0.48 | 0.52 |
| 13 | 0.54 | 0.57 | 0.46 | 0.46 | 0.63 | 0.49 | 0.56 | 0.51 | 0.58 |
| 14 | 0.78 | 0.75 | 0.76 | 0.81 | 0.70 | 0.77 | 0.84 | 0.75 | 0.77 |
| 15 | 0.79 | 0.78 | 0.81 | 0.83 | 0.79 | 0.85 | 0.86 | 0.80 | 0.86 |
| 16 | 0.86 | 0.85 | 0.87 | 0.84 | 0.87 | 0.85 | 0.87 | 0.85 | 0.85 |
| 17 | 0.93 | 0.93 | 0.90 | 0.91 | 0.92 | 0.91 | 0.92 | 0.93 | 0.92 |
| 18 | 0.95 | 0.93 | 0.93 | 0.93 | 0.95 | 0.94 | 0.95 | 0.94 | 0.94 |
| 19 |      |      |      |      |      |      |      |      |      |
| 20 |      |      |      |      |      |      |      |      |      |
| 21 |      |      |      |      |      |      |      |      |      |
| 22 |      |      |      |      |      |      |      |      |      |
| 23 |      |      |      |      |      |      |      |      |      |
| 24 |      |      |      |      |      |      |      |      |      |
| 25 |      |      |      |      |      |      |      |      |      |
| 26 |      |      |      |      |      |      |      |      |      |
| 27 |      |      |      |      |      |      |      |      |      |
| 28 |      |      |      |      |      |      |      |      |      |
| 29 |      |      |      |      |      |      |      |      |      |
| 30 |      |      |      |      |      |      |      |      |      |
| 31 |      |      |      |      |      |      |      |      |      |
| 32 |      |      |      |      |      |      |      |      |      |
| 33 |      |      |      |      |      |      |      |      |      |
| 34 |      |      |      |      |      |      |      |      |      |
| 35 |      |      |      |      |      |      |      |      |      |
| 36 |      |      |      |      |      |      |      |      |      |
| 37 |      |      |      |      |      |      |      |      |      |
| 38 |      |      |      |      |      |      |      |      |      |
| 39 |      |      |      |      |      |      |      |      |      |
| 40 |      |      |      |      |      |      |      |      |      |
| 41 |      |      |      |      |      |      |      |      |      |
| 42 |      |      |      |      |      |      |      |      |      |
| 43 |      |      |      |      |      |      |      |      |      |
| 44 |      |      |      |      |      |      |      |      |      |
| 45 |      |      |      |      |      |      |      |      |      |
| 46 |      |      |      |      |      |      |      |      |      |
| 47 |      |      |      |      |      |      |      |      |      |
| 48 |      |      |      |      |      |      |      |      |      |
| 49 |      |      |      |      |      |      |      |      |      |
| 50 |      |      |      |      |      |      |      |      |      |
| 51 |      |      |      |      |      |      |      |      |      |
| 52 |      |      |      |      |      |      |      |      |      |
| 53 |      |      |      |      |      |      |      |      |      |
| 54 |      |      |      |      |      |      |      |      |      |
| 55 |      |      |      |      |      |      |      |      |      |
| 56 |      |      |      |      |      |      |      |      |      |
| 57 |      |      |      |      |      |      |      |      |      |
| 58 |      |      |      |      |      |      |      |      |      |
| 59 |      |      |      |      |      |      |      |      |      |
| 60 |      |      |      |      |      |      |      |      |      |

1  
2  
3  
4  
5  
6  
7  
8  
9  
10  
11  
12  
13  
14  
15  
16  
17  
18  
19  
20  
21  
22  
23  
24  
25  
26  
27  
28  
29  
30  
31  
32  
33  
34  
35  
36  
37  
38  
39  
40  
41  
42  
43  
44  
45  
46  
47  
48  
49  
50  
51  
52  
53  
54  
55  
56  
57  
58  
59  
60

506 506 507 516 517 523 529 540 542

| RXH  | RXK  | RD1  | RJL  | RXF  | RQ8  | RXQ  | RTF  | RD3  |
|------|------|------|------|------|------|------|------|------|
| 0.58 | 0.59 | 0.61 | 0.61 | 0.60 | 0.61 | 0.58 | 0.60 | 0.63 |
| 0.58 | 0.61 | 0.60 | 0.61 | 0.62 | 0.60 | 0.61 | 0.61 | 0.61 |
| 0.47 | 0.46 | 0.44 | 0.49 | 0.48 | 0.48 | 0.45 | 0.43 | 0.48 |
| 0.27 | 0.29 | 0.31 | 0.24 | 0.24 | 0.20 | 0.16 | 0.28 | 0.37 |
| 0.46 | 0.47 | 0.43 | 0.39 | 0.44 | 0.41 | 0.45 | 0.37 | 0.42 |
| 0.63 | 0.62 | 0.61 | 0.64 | 0.60 | 0.62 | 0.64 | 0.58 | 0.66 |
| 0.66 | 0.67 | 0.67 | 0.67 | 0.68 | 0.67 | 0.67 | 0.68 | 0.69 |
| 0.55 | 0.47 | 0.57 | 0.61 | 0.60 | 0.59 | 0.56 | 0.53 | 0.57 |
| 0.53 | 0.55 | 0.56 | 0.59 | 0.57 | 0.54 | 0.59 | 0.55 | 0.58 |
| 0.57 | 0.53 | 0.55 | 0.59 | 0.56 | 0.55 | 0.57 | 0.52 | 0.58 |
| 0.51 | 0.54 | 0.50 | 0.53 | 0.53 | 0.53 | 0.52 | 0.45 | 0.53 |
| 0.16 | 0.20 | 0.24 | 0.16 | 0.18 | 0.15 | 0.16 | 0.18 | 0.34 |
| 0.61 | 0.62 | 0.59 | 0.65 | 0.60 | 0.63 | 0.61 | 0.58 | 0.66 |
| 0.73 | 0.73 | 0.73 | 0.72 | 0.71 | 0.72 | 0.74 | 0.69 | 0.73 |
| 0.51 | 0.50 | 0.46 | 0.49 | 0.47 | 0.51 | 0.53 | 0.45 | 0.48 |
| 0.48 | 0.53 | 0.44 | 0.45 | 0.51 | 0.41 | 0.43 | 0.43 | 0.45 |
| 0.70 | 0.70 | 0.67 | 0.71 | 0.71 | 0.70 | 0.71 | 0.69 | 0.71 |
| 0.47 | 0.60 | 0.55 | 0.64 | 0.62 | 0.58 | 0.62 | 0.61 | 0.64 |
| 0.63 | 0.65 | 0.63 | 0.59 | 0.66 | 0.64 | 0.59 | 0.57 | 0.64 |
| 0.73 | 0.71 | 0.72 | 0.75 | 0.74 | 0.73 | 0.74 | 0.73 | 0.76 |
| 0.69 | 0.72 | 0.72 | 0.72 | 0.74 | 0.73 | 0.72 | 0.74 | 0.73 |
| 0.71 | 0.71 | 0.70 | 0.74 | 0.70 | 0.72 | 0.73 | 0.69 | 0.72 |
| 0.23 | 0.25 | 0.28 | 0.28 | 0.34 | 0.19 | 0.34 | 0.32 | 0.26 |
| 0.57 | 0.62 | 0.57 | 0.56 | 0.61 | 0.58 | 0.59 | 0.51 | 0.56 |
| 0.68 | 0.62 | 0.56 | 0.67 | 0.61 | 0.64 | 0.64 | 0.55 | 0.58 |
| 0.77 | 0.77 | 0.76 | 0.77 | 0.77 | 0.77 | 0.76 | 0.78 | 0.78 |
| 0.80 | 0.81 | 0.81 | 0.81 | 0.81 | 0.81 | 0.81 | 0.81 | 0.81 |
| 0.55 | 0.65 | 0.58 | 0.53 | 0.60 | 0.49 | 0.56 | 0.55 | 0.56 |
| 0.41 | 0.54 | 0.56 | 0.61 | 0.58 | 0.53 | 0.57 | 0.57 | 0.62 |
| 0.67 | 0.64 | 0.65 | 0.67 | 0.68 | 0.64 | 0.65 | 0.67 | 0.68 |
| 0.59 | 0.62 | 0.60 | 0.65 | 0.65 | 0.57 | 0.60 | 0.58 | 0.59 |
| 0.77 | 0.74 | 0.70 | 0.75 | 0.72 | 0.74 | 0.72 | 0.73 | 0.76 |
| 0.55 | 0.52 | 0.47 | 0.53 | 0.49 | 0.57 | 0.51 | 0.37 | 0.44 |
| 0.70 | 0.72 | 0.66 | 0.70 | 0.68 | 0.70 | 0.65 | 0.56 | 0.62 |

|    |      |      |      |      |      |      |      |      |      |
|----|------|------|------|------|------|------|------|------|------|
| 1  |      |      |      |      |      |      |      |      |      |
| 2  | 0.61 | 0.67 | 0.57 | 0.66 | 0.63 | 0.64 | 0.68 | 0.61 | 0.60 |
| 3  | 0.62 | 0.61 | 0.60 | 0.68 | 0.64 | 0.67 | 0.66 | 0.65 | 0.69 |
| 4  | 0.65 | 0.67 | 0.64 | 0.64 | 0.71 | 0.65 | 0.64 | 0.70 | 0.72 |
| 5  | 0.52 | 0.53 | 0.55 | 0.48 | 0.49 | 0.53 | 0.51 | 0.58 | 0.48 |
| 6  | 0.78 | 0.80 | 0.81 | 0.81 | 0.83 | 0.79 | 0.78 | 0.78 | 0.81 |
| 7  | 0.79 | 0.82 | 0.80 | 0.82 | 0.84 | 0.80 | 0.79 | 0.85 | 0.85 |
| 8  | 0.80 | 0.76 | 0.70 | 0.83 | 0.75 | 0.79 | 0.76 | 0.76 | 0.75 |
| 9  | 0.80 | 0.75 | 0.72 | 0.73 | 0.71 | 0.80 | 0.83 | 0.73 | 0.75 |
| 10 | 0.80 | 0.75 | 0.72 | 0.73 | 0.71 | 0.80 | 0.83 | 0.73 | 0.75 |
| 11 | 0.83 | 0.85 | 0.82 | 0.86 | 0.85 | 0.83 | 0.81 | 0.85 | 0.84 |
| 12 | 0.81 | 0.82 | 0.88 | 0.90 | 0.87 | 0.89 | 0.88 | 0.89 | 0.89 |
| 13 | 0.59 | 0.64 | 0.55 | 0.65 | 0.64 | 0.55 | 0.63 | 0.48 | 0.63 |
| 14 | 0.61 | 0.72 | 0.53 | 0.66 | 0.51 | 0.54 | 0.62 | 0.53 | 0.58 |
| 15 | 0.86 | 0.76 | 0.80 | 0.83 | 0.86 | 0.79 | 0.81 | 0.79 | 0.72 |
| 16 | 0.82 | 0.86 | 0.82 | 0.87 | 0.86 | 0.85 | 0.82 | 0.86 | 0.85 |
| 17 | 0.82 | 0.86 | 0.82 | 0.87 | 0.86 | 0.85 | 0.82 | 0.86 | 0.85 |
| 18 | 0.87 | 0.87 | 0.86 | 0.88 | 0.88 | 0.88 | 0.88 | 0.86 | 0.88 |
| 19 | 0.94 | 0.94 | 0.94 | 0.94 | 0.93 | 0.94 | 0.93 | 0.91 | 0.92 |
| 20 | 0.95 | 0.95 | 0.95 | 0.94 | 0.95 | 0.94 | 0.95 | 0.94 | 0.94 |
| 21 |      |      |      |      |      |      |      |      |      |
| 22 |      |      |      |      |      |      |      |      |      |
| 23 |      |      |      |      |      |      |      |      |      |
| 24 |      |      |      |      |      |      |      |      |      |
| 25 |      |      |      |      |      |      |      |      |      |
| 26 |      |      |      |      |      |      |      |      |      |
| 27 |      |      |      |      |      |      |      |      |      |
| 28 |      |      |      |      |      |      |      |      |      |
| 29 |      |      |      |      |      |      |      |      |      |
| 30 |      |      |      |      |      |      |      |      |      |
| 31 |      |      |      |      |      |      |      |      |      |
| 32 |      |      |      |      |      |      |      |      |      |
| 33 |      |      |      |      |      |      |      |      |      |
| 34 |      |      |      |      |      |      |      |      |      |
| 35 |      |      |      |      |      |      |      |      |      |
| 36 |      |      |      |      |      |      |      |      |      |
| 37 |      |      |      |      |      |      |      |      |      |
| 38 |      |      |      |      |      |      |      |      |      |
| 39 |      |      |      |      |      |      |      |      |      |
| 40 |      |      |      |      |      |      |      |      |      |
| 41 |      |      |      |      |      |      |      |      |      |
| 42 |      |      |      |      |      |      |      |      |      |
| 43 |      |      |      |      |      |      |      |      |      |
| 44 |      |      |      |      |      |      |      |      |      |
| 45 |      |      |      |      |      |      |      |      |      |
| 46 |      |      |      |      |      |      |      |      |      |
| 47 |      |      |      |      |      |      |      |      |      |
| 48 |      |      |      |      |      |      |      |      |      |
| 49 |      |      |      |      |      |      |      |      |      |
| 50 |      |      |      |      |      |      |      |      |      |
| 51 |      |      |      |      |      |      |      |      |      |
| 52 |      |      |      |      |      |      |      |      |      |
| 53 |      |      |      |      |      |      |      |      |      |
| 54 |      |      |      |      |      |      |      |      |      |
| 55 |      |      |      |      |      |      |      |      |      |
| 56 |      |      |      |      |      |      |      |      |      |
| 57 |      |      |      |      |      |      |      |      |      |
| 58 |      |      |      |      |      |      |      |      |      |
| 59 |      |      |      |      |      |      |      |      |      |
| 60 |      |      |      |      |      |      |      |      |      |

1  
2  
3  
4  
5  
6  
7  
8  
9  
10  
11  
12  
13  
14  
15  
16  
17  
18  
19  
20  
21  
22  
23  
24  
25  
26  
27  
28  
29  
30  
31  
32  
33  
34  
35  
36  
37  
38  
39  
40  
41  
42  
43  
44  
45  
46  
47  
48  
49  
50  
51  
52  
53  
54  
55  
56  
57  
58  
59  
60

548 552 572 594 602 613 623 631 644

| RW6  | RNA  | RA9  | RA2  | RTX  | RXC  | RXL  | RBA  | RAJ  |
|------|------|------|------|------|------|------|------|------|
| 0.64 | 0.61 | 0.58 | 0.63 | 0.63 | 0.64 | 0.63 | 0.63 | 0.64 |
| 0.63 | 0.62 | 0.60 | 0.62 | 0.62 | 0.63 | 0.66 | 0.63 | 0.64 |
| 0.47 | 0.49 | 0.46 | 0.55 | 0.46 | 0.49 | 0.53 | 0.50 | 0.53 |
| 0.29 | 0.21 | 0.39 | 0.32 | 0.22 | 0.21 | 0.25 | 0.33 | 0.41 |
| 0.44 | 0.45 | 0.46 | 0.52 | 0.39 | 0.43 | 0.45 | 0.46 | 0.46 |
| 0.66 | 0.63 | 0.63 | 0.67 | 0.65 | 0.68 | 0.67 | 0.65 | 0.69 |
| 0.68 | 0.68 | 0.68 | 0.71 | 0.70 | 0.70 | 0.72 | 0.71 | 0.72 |
| 0.57 | 0.57 | 0.54 | 0.57 | 0.59 | 0.62 | 0.62 | 0.60 | 0.60 |
| 0.62 | 0.60 | 0.58 | 0.62 | 0.60 | 0.63 | 0.62 | 0.62 | 0.56 |
| 0.59 | 0.57 | 0.56 | 0.61 | 0.56 | 0.61 | 0.62 | 0.60 | 0.61 |
| 0.51 | 0.53 | 0.46 | 0.62 | 0.49 | 0.52 | 0.57 | 0.49 | 0.59 |
| 0.21 | 0.13 | 0.35 | 0.30 | 0.17 | 0.22 | 0.25 | 0.29 | 0.40 |
| 0.65 | 0.64 | 0.62 | 0.67 | 0.65 | 0.68 | 0.67 | 0.63 | 0.67 |
| 0.75 | 0.74 | 0.72 | 0.76 | 0.74 | 0.77 | 0.76 | 0.75 | 0.76 |
| 0.53 | 0.54 | 0.51 | 0.66 | 0.53 | 0.56 | 0.50 | 0.46 | 0.59 |
| 0.51 | 0.48 | 0.48 | 0.57 | 0.47 | 0.50 | 0.51 | 0.38 | 0.58 |
| 0.74 | 0.72 | 0.65 | 0.73 | 0.71 | 0.74 | 0.74 | 0.72 | 0.76 |
| 0.52 | 0.65 | 0.56 | 0.56 | 0.60 | 0.65 | 0.66 | 0.64 | 0.69 |
| 0.65 | 0.64 | 0.62 | 0.73 | 0.61 | 0.66 | 0.68 | 0.62 | 0.70 |
| 0.75 | 0.75 | 0.72 | 0.75 | 0.75 | 0.77 | 0.77 | 0.73 | 0.76 |
| 0.75 | 0.74 | 0.73 | 0.76 | 0.73 | 0.75 | 0.76 | 0.74 | 0.76 |
| 0.75 | 0.75 | 0.71 | 0.73 | 0.72 | 0.76 | 0.75 | 0.72 | 0.75 |
| 0.29 | 0.19 | 0.34 | 0.35 | 0.28 | 0.17 | 0.28 | 0.31 | 0.31 |
| 0.61 | 0.61 | 0.57 | 0.66 | 0.58 | 0.58 | 0.61 | 0.56 | 0.66 |
| 0.62 | 0.69 | 0.62 | 0.70 | 0.67 | 0.68 | 0.66 | 0.63 | 0.64 |
| 0.77 | 0.78 | 0.78 | 0.78 | 0.80 | 0.78 | 0.81 | 0.81 | 0.78 |
| 0.83 | 0.82 | 0.82 | 0.83 | 0.82 | 0.84 | 0.84 | 0.83 | 0.84 |
| 0.62 | 0.56 | 0.55 | 0.69 | 0.51 | 0.58 | 0.62 | 0.52 | 0.59 |
| 0.49 | 0.58 | 0.45 | 0.54 | 0.57 | 0.60 | 0.61 | 0.55 | 0.66 |
| 0.70 | 0.66 | 0.59 | 0.68 | 0.68 | 0.70 | 0.72 | 0.66 | 0.70 |
| 0.68 | 0.56 | 0.53 | 0.65 | 0.55 | 0.62 | 0.63 | 0.59 | 0.58 |
| 0.74 | 0.75 | 0.75 | 0.81 | 0.79 | 0.80 | 0.78 | 0.75 | 0.78 |
| 0.63 | 0.56 | 0.48 | 0.52 | 0.54 | 0.54 | 0.65 | 0.48 | 0.49 |
| 0.70 | 0.69 | 0.62 | 0.75 | 0.62 | 0.71 | 0.73 | 0.69 | 0.72 |

|    |      |      |      |      |      |      |      |      |      |
|----|------|------|------|------|------|------|------|------|------|
| 1  |      |      |      |      |      |      |      |      |      |
| 2  | 0.71 | 0.63 | 0.67 | 0.63 | 0.63 | 0.76 | 0.69 | 0.65 | 0.66 |
| 3  | 0.69 | 0.70 | 0.65 | 0.69 | 0.64 | 0.70 | 0.63 | 0.60 | 0.71 |
| 4  | 0.74 | 0.66 | 0.65 | 0.68 | 0.67 | 0.67 | 0.72 | 0.66 | 0.72 |
| 5  | 0.60 | 0.52 | 0.43 | 0.60 | 0.59 | 0.49 | 0.59 | 0.50 | 0.43 |
| 6  | 0.81 | 0.83 | 0.79 | 0.86 | 0.79 | 0.81 | 0.82 | 0.77 | 0.85 |
| 7  | 0.86 | 0.81 | 0.80 | 0.83 | 0.84 | 0.83 | 0.86 | 0.82 | 0.85 |
| 8  | 0.83 | 0.81 | 0.74 | 0.82 | 0.79 | 0.83 | 0.79 | 0.74 | 0.79 |
| 9  | 0.81 | 0.80 | 0.79 | 0.81 | 0.79 | 0.84 | 0.84 | 0.76 | 0.81 |
| 10 | 0.85 | 0.86 | 0.81 | 0.81 | 0.85 | 0.85 | 0.86 | 0.84 | 0.86 |
| 11 | 0.89 | 0.86 | 0.87 | 0.90 | 0.88 | 0.90 | 0.90 | 0.90 | 0.90 |
| 12 | 0.66 | 0.67 | 0.66 | 0.67 | 0.52 | 0.52 | 0.59 | 0.43 | 0.52 |
| 13 | 0.68 | 0.74 | 0.53 | 0.70 | 0.70 | 0.62 | 0.53 | 0.46 | 0.75 |
| 14 | 0.84 | 0.86 | 0.79 | 0.83 | 0.82 | 0.77 | 0.74 | 0.81 | 0.85 |
| 15 | 0.87 | 0.84 | 0.78 | 0.86 | 0.85 | 0.89 | 0.87 | 0.83 | 0.80 |
| 16 | 0.87 | 0.90 | 0.88 | 0.92 | 0.87 | 0.86 | 0.91 | 0.89 | 0.91 |
| 17 | 0.94 | 0.95 | 0.93 | 0.95 | 0.94 | 0.95 | 0.94 | 0.91 | 0.95 |
| 18 | 0.94 | 0.95 | 0.94 | 0.95 | 0.96 | 0.95 | 0.95 | 0.96 | 0.95 |
| 19 |      |      |      |      |      |      |      |      |      |
| 20 |      |      |      |      |      |      |      |      |      |
| 21 |      |      |      |      |      |      |      |      |      |
| 22 |      |      |      |      |      |      |      |      |      |
| 23 |      |      |      |      |      |      |      |      |      |
| 24 |      |      |      |      |      |      |      |      |      |
| 25 |      |      |      |      |      |      |      |      |      |
| 26 |      |      |      |      |      |      |      |      |      |
| 27 |      |      |      |      |      |      |      |      |      |
| 28 |      |      |      |      |      |      |      |      |      |
| 29 |      |      |      |      |      |      |      |      |      |
| 30 |      |      |      |      |      |      |      |      |      |
| 31 |      |      |      |      |      |      |      |      |      |
| 32 |      |      |      |      |      |      |      |      |      |
| 33 |      |      |      |      |      |      |      |      |      |
| 34 |      |      |      |      |      |      |      |      |      |
| 35 |      |      |      |      |      |      |      |      |      |
| 36 |      |      |      |      |      |      |      |      |      |
| 37 |      |      |      |      |      |      |      |      |      |
| 38 |      |      |      |      |      |      |      |      |      |
| 39 |      |      |      |      |      |      |      |      |      |
| 40 |      |      |      |      |      |      |      |      |      |
| 41 |      |      |      |      |      |      |      |      |      |
| 42 |      |      |      |      |      |      |      |      |      |
| 43 |      |      |      |      |      |      |      |      |      |
| 44 |      |      |      |      |      |      |      |      |      |
| 45 |      |      |      |      |      |      |      |      |      |
| 46 |      |      |      |      |      |      |      |      |      |
| 47 |      |      |      |      |      |      |      |      |      |
| 48 |      |      |      |      |      |      |      |      |      |
| 49 |      |      |      |      |      |      |      |      |      |
| 50 |      |      |      |      |      |      |      |      |      |
| 51 |      |      |      |      |      |      |      |      |      |
| 52 |      |      |      |      |      |      |      |      |      |
| 53 |      |      |      |      |      |      |      |      |      |
| 54 |      |      |      |      |      |      |      |      |      |
| 55 |      |      |      |      |      |      |      |      |      |
| 56 |      |      |      |      |      |      |      |      |      |
| 57 |      |      |      |      |      |      |      |      |      |
| 58 |      |      |      |      |      |      |      |      |      |
| 59 |      |      |      |      |      |      |      |      |      |
| 60 |      |      |      |      |      |      |      |      |      |

1  
2  
3  
4  
5  
6  
7  
8  
9  
10  
11  
12  
13  
14  
15  
16  
17  
18  
19  
20  
21  
22  
23  
24  
25  
26  
27  
28  
29  
30  
31  
32  
33  
34  
35  
36  
37  
38  
39  
40  
41  
42  
43  
44  
45  
46  
47  
48  
49  
50  
51  
52  
53  
54  
55  
56  
57  
58  
59  
60

659 666 673 678 698 707 723 728 738

| RRK  | RHU  | RXR  | RJ7  | RR1  | RYR  | RXN  | RYJ  | RX1  |
|------|------|------|------|------|------|------|------|------|
| 0.67 | 0.66 | 0.65 | 0.67 | 0.65 | 0.69 | 0.65 | 0.70 | 0.68 |
| 0.66 | 0.66 | 0.68 | 0.66 | 0.68 | 0.67 | 0.68 | 0.68 | 0.69 |
| 0.60 | 0.55 | 0.53 | 0.57 | 0.58 | 0.50 | 0.55 | 0.61 | 0.62 |
| 0.31 | 0.49 | 0.28 | 0.31 | 0.29 | 0.26 | 0.54 | 0.43 | 0.49 |
| 0.53 | 0.49 | 0.47 | 0.51 | 0.56 | 0.45 | 0.55 | 0.58 | 0.57 |
| 0.68 | 0.68 | 0.72 | 0.70 | 0.70 | 0.71 | 0.70 | 0.73 | 0.70 |
| 0.72 | 0.72 | 0.73 | 0.73 | 0.73 | 0.74 | 0.75 | 0.75 | 0.75 |
| 0.62 | 0.60 | 0.63 | 0.63 | 0.61 | 0.61 | 0.62 | 0.67 | 0.64 |
| 0.65 | 0.64 | 0.63 | 0.63 | 0.64 | 0.64 | 0.63 | 0.68 | 0.65 |
| 0.62 | 0.61 | 0.65 | 0.65 | 0.64 | 0.65 | 0.64 | 0.68 | 0.63 |
| 0.64 | 0.62 | 0.58 | 0.59 | 0.64 | 0.54 | 0.59 | 0.65 | 0.67 |
| 0.23 | 0.42 | 0.28 | 0.30 | 0.23 | 0.26 | 0.49 | 0.45 | 0.41 |
| 0.68 | 0.68 | 0.71 | 0.71 | 0.72 | 0.68 | 0.67 | 0.74 | 0.73 |
| 0.78 | 0.77 | 0.79 | 0.79 | 0.79 | 0.79 | 0.78 | 0.80 | 0.80 |
| 0.64 | 0.62 | 0.54 | 0.62 | 0.64 | 0.57 | 0.63 | 0.68 | 0.65 |
| 0.60 | 0.55 | 0.52 | 0.62 | 0.61 | 0.43 | 0.58 | 0.64 | 0.62 |
| 0.74 | 0.74 | 0.76 | 0.77 | 0.77 | 0.77 | 0.76 | 0.80 | 0.78 |
| 0.60 | 0.70 | 0.68 | 0.68 | 0.68 | 0.71 | 0.62 | 0.70 | 0.70 |
| 0.75 | 0.71 | 0.69 | 0.73 | 0.74 | 0.67 | 0.70 | 0.77 | 0.77 |
| 0.77 | 0.79 | 0.80 | 0.79 | 0.78 | 0.79 | 0.77 | 0.82 | 0.79 |
| 0.77 | 0.77 | 0.79 | 0.78 | 0.79 | 0.78 | 0.78 | 0.81 | 0.80 |
| 0.77 | 0.78 | 0.79 | 0.78 | 0.79 | 0.78 | 0.77 | 0.81 | 0.79 |
| 0.39 | 0.40 | 0.26 | 0.39 | 0.34 | 0.36 | 0.34 | 0.49 | 0.30 |
| 0.70 | 0.63 | 0.66 | 0.65 | 0.70 | 0.60 | 0.64 | 0.73 | 0.74 |
| 0.70 | 0.72 | 0.69 | 0.63 | 0.74 | 0.68 | 0.69 | 0.73 | 0.70 |
| 0.82 | 0.80 | 0.82 | 0.79 | 0.81 | 0.79 | 0.83 | 0.81 | 0.83 |
| 0.85 | 0.84 | 0.85 | 0.86 | 0.86 | 0.85 | 0.85 | 0.86 | 0.87 |
| 0.73 | 0.66 | 0.67 | 0.68 | 0.71 | 0.60 | 0.68 | 0.76 | 0.65 |
| 0.56 | 0.67 | 0.68 | 0.67 | 0.61 | 0.68 | 0.59 | 0.73 | 0.64 |
| 0.74 | 0.70 | 0.75 | 0.74 | 0.73 | 0.71 | 0.72 | 0.77 | 0.73 |
| 0.68 | 0.69 | 0.68 | 0.71 | 0.70 | 0.59 | 0.61 | 0.76 | 0.70 |
| 0.81 | 0.81 | 0.81 | 0.80 | 0.80 | 0.80 | 0.78 | 0.85 | 0.81 |
| 0.60 | 0.63 | 0.60 | 0.61 | 0.66 | 0.60 | 0.58 | 0.68 | 0.64 |
| 0.78 | 0.78 | 0.73 | 0.77 | 0.78 | 0.68 | 0.75 | 0.81 | 0.80 |

|    |      |      |      |      |      |      |      |      |      |
|----|------|------|------|------|------|------|------|------|------|
| 1  |      |      |      |      |      |      |      |      |      |
| 2  | 0.73 | 0.69 | 0.75 | 0.77 | 0.74 | 0.75 | 0.74 | 0.81 | 0.76 |
| 3  | 0.75 | 0.74 | 0.71 | 0.72 | 0.73 | 0.66 | 0.68 | 0.78 | 0.77 |
| 4  | 0.74 | 0.74 | 0.79 | 0.72 | 0.75 | 0.69 | 0.77 | 0.78 | 0.74 |
| 5  | 0.58 | 0.57 | 0.62 | 0.62 | 0.71 | 0.56 | 0.57 | 0.73 | 0.63 |
| 6  | 0.88 | 0.86 | 0.84 | 0.85 | 0.87 | 0.82 | 0.85 | 0.88 | 0.89 |
| 7  | 0.85 | 0.84 | 0.88 | 0.84 | 0.87 | 0.83 | 0.87 | 0.87 | 0.86 |
| 8  | 0.80 | 0.81 | 0.80 | 0.87 | 0.84 | 0.84 | 0.82 | 0.88 | 0.84 |
| 9  | 0.80 | 0.85 | 0.83 | 0.85 | 0.82 | 0.86 | 0.82 | 0.88 | 0.84 |
| 10 | 0.80 | 0.85 | 0.83 | 0.85 | 0.82 | 0.86 | 0.82 | 0.88 | 0.84 |
| 11 | 0.87 | 0.87 | 0.88 | 0.87 | 0.88 | 0.85 | 0.87 | 0.89 | 0.89 |
| 12 | 0.89 | 0.89 | 0.87 | 0.91 | 0.85 | 0.90 | 0.87 | 0.92 | 0.90 |
| 13 | 0.71 | 0.72 | 0.71 | 0.76 | 0.64 | 0.66 | 0.72 | 0.82 | 0.71 |
| 14 | 0.63 | 0.64 | 0.71 | 0.71 | 0.71 | 0.71 | 0.66 | 0.79 | 0.69 |
| 15 | 0.84 | 0.83 | 0.80 | 0.85 | 0.86 | 0.85 | 0.83 | 0.79 | 0.81 |
| 16 | 0.89 | 0.84 | 0.89 | 0.89 | 0.89 | 0.88 | 0.86 | 0.88 | 0.84 |
| 17 | 0.89 | 0.84 | 0.89 | 0.89 | 0.89 | 0.88 | 0.86 | 0.88 | 0.84 |
| 18 | 0.93 | 0.92 | 0.89 | 0.92 | 0.92 | 0.87 | 0.90 | 0.93 | 0.92 |
| 19 | 0.95 | 0.95 | 0.95 | 0.96 | 0.95 | 0.95 | 0.95 | 0.96 | 0.96 |
| 20 | 0.97 | 0.96 | 0.95 | 0.96 | 0.95 | 0.96 | 0.95 | 0.97 | 0.97 |
| 21 |      |      |      |      |      |      |      |      |      |
| 22 |      |      |      |      |      |      |      |      |      |
| 23 |      |      |      |      |      |      |      |      |      |
| 24 |      |      |      |      |      |      |      |      |      |
| 25 |      |      |      |      |      |      |      |      |      |
| 26 |      |      |      |      |      |      |      |      |      |
| 27 |      |      |      |      |      |      |      |      |      |
| 28 |      |      |      |      |      |      |      |      |      |
| 29 |      |      |      |      |      |      |      |      |      |
| 30 |      |      |      |      |      |      |      |      |      |
| 31 |      |      |      |      |      |      |      |      |      |
| 32 |      |      |      |      |      |      |      |      |      |
| 33 |      |      |      |      |      |      |      |      |      |
| 34 |      |      |      |      |      |      |      |      |      |
| 35 |      |      |      |      |      |      |      |      |      |
| 36 |      |      |      |      |      |      |      |      |      |
| 37 |      |      |      |      |      |      |      |      |      |
| 38 |      |      |      |      |      |      |      |      |      |
| 39 |      |      |      |      |      |      |      |      |      |
| 40 |      |      |      |      |      |      |      |      |      |
| 41 |      |      |      |      |      |      |      |      |      |
| 42 |      |      |      |      |      |      |      |      |      |
| 43 |      |      |      |      |      |      |      |      |      |
| 44 |      |      |      |      |      |      |      |      |      |
| 45 |      |      |      |      |      |      |      |      |      |
| 46 |      |      |      |      |      |      |      |      |      |
| 47 |      |      |      |      |      |      |      |      |      |
| 48 |      |      |      |      |      |      |      |      |      |
| 49 |      |      |      |      |      |      |      |      |      |
| 50 |      |      |      |      |      |      |      |      |      |
| 51 |      |      |      |      |      |      |      |      |      |
| 52 |      |      |      |      |      |      |      |      |      |
| 53 |      |      |      |      |      |      |      |      |      |
| 54 |      |      |      |      |      |      |      |      |      |
| 55 |      |      |      |      |      |      |      |      |      |
| 56 |      |      |      |      |      |      |      |      |      |
| 57 |      |      |      |      |      |      |      |      |      |
| 58 |      |      |      |      |      |      |      |      |      |
| 59 |      |      |      |      |      |      |      |      |      |
| 60 |      |      |      |      |      |      |      |      |      |

1  
2  
3  
4  
5  
6  
7  
8  
9  
10  
11  
12  
13  
14  
15  
16  
17  
18  
19  
20  
21  
22  
23  
24  
25  
26  
27  
28  
29  
30  
31  
32  
33  
34  
35  
36  
37  
38  
39  
40  
41  
42  
43  
44  
45  
46  
47  
48  
49  
50  
51  
52  
53  
54  
55  
56  
57  
58  
59  
60

740 743 748 750 765 766 770 781 801

| RWD  | RL4  | RN5  | RDU  | RBV  | RA7  | REF  | RAL  | RKB  |
|------|------|------|------|------|------|------|------|------|
| 0.68 | 0.69 | 0.70 | 0.69 | 0.70 | 0.70 | 0.67 | 0.71 | 0.71 |
| 0.69 | 0.69 | 0.70 | 0.68 | 0.70 | 0.70 | 0.69 | 0.70 | 0.71 |
| 0.55 | 0.57 | 0.57 | 0.53 | 0.62 | 0.58 | 0.55 | 0.58 | 0.61 |
| 0.48 | 0.40 | 0.36 | 0.28 | 0.43 | 0.47 | 0.43 | 0.39 | 0.41 |
| 0.52 | 0.50 | 0.50 | 0.51 | 0.55 | 0.53 | 0.48 | 0.58 | 0.54 |
| 0.73 | 0.71 | 0.72 | 0.72 | 0.71 | 0.71 | 0.70 | 0.74 | 0.72 |
| 0.75 | 0.75 | 0.75 | 0.75 | 0.76 | 0.75 | 0.75 | 0.76 | 0.76 |
| 0.67 | 0.63 | 0.67 | 0.66 | 0.69 | 0.69 | 0.66 | 0.71 | 0.68 |
| 0.63 | 0.67 | 0.68 | 0.65 | 0.69 | 0.66 | 0.68 | 0.68 | 0.69 |
| 0.68 | 0.64 | 0.67 | 0.66 | 0.64 | 0.68 | 0.65 | 0.71 | 0.65 |
| 0.62 | 0.63 | 0.62 | 0.58 | 0.65 | 0.64 | 0.61 | 0.64 | 0.66 |
| 0.39 | 0.38 | 0.36 | 0.29 | 0.39 | 0.46 | 0.36 | 0.36 | 0.37 |
| 0.73 | 0.70 | 0.72 | 0.72 | 0.71 | 0.72 | 0.68 | 0.76 | 0.72 |
| 0.80 | 0.80 | 0.80 | 0.80 | 0.81 | 0.81 | 0.79 | 0.81 | 0.80 |
| 0.61 | 0.62 | 0.55 | 0.60 | 0.69 | 0.64 | 0.62 | 0.62 | 0.71 |
| 0.57 | 0.57 | 0.53 | 0.53 | 0.57 | 0.56 | 0.56 | 0.59 | 0.63 |
| 0.79 | 0.78 | 0.79 | 0.77 | 0.77 | 0.78 | 0.77 | 0.81 | 0.79 |
| 0.72 | 0.71 | 0.69 | 0.65 | 0.69 | 0.74 | 0.66 | 0.66 | 0.71 |
| 0.72 | 0.74 | 0.71 | 0.70 | 0.70 | 0.73 | 0.69 | 0.74 | 0.76 |
| 0.81 | 0.79 | 0.81 | 0.81 | 0.82 | 0.82 | 0.78 | 0.82 | 0.82 |
| 0.81 | 0.80 | 0.79 | 0.79 | 0.81 | 0.81 | 0.80 | 0.81 | 0.81 |
| 0.81 | 0.80 | 0.78 | 0.79 | 0.80 | 0.80 | 0.78 | 0.81 | 0.81 |
| 0.31 | 0.30 | 0.34 | 0.41 | 0.34 | 0.40 | 0.39 | 0.46 | 0.30 |
| 0.71 | 0.71 | 0.61 | 0.67 | 0.66 | 0.70 | 0.65 | 0.69 | 0.72 |
| 0.70 | 0.74 | 0.73 | 0.69 | 0.71 | 0.70 | 0.73 | 0.72 | 0.72 |
| 0.81 | 0.81 | 0.80 | 0.81 | 0.82 | 0.82 | 0.83 | 0.82 | 0.84 |
| 0.87 | 0.86 | 0.86 | 0.86 | 0.87 | 0.87 | 0.86 | 0.87 | 0.87 |
| 0.67 | 0.71 | 0.59 | 0.64 | 0.68 | 0.64 | 0.61 | 0.69 | 0.73 |
| 0.74 | 0.70 | 0.70 | 0.65 | 0.66 | 0.73 | 0.69 | 0.66 | 0.63 |
| 0.77 | 0.73 | 0.74 | 0.75 | 0.74 | 0.70 | 0.75 | 0.79 | 0.71 |
| 0.70 | 0.71 | 0.69 | 0.70 | 0.68 | 0.68 | 0.64 | 0.70 | 0.69 |
| 0.81 | 0.84 | 0.82 | 0.80 | 0.84 | 0.83 | 0.81 | 0.85 | 0.83 |
| 0.67 | 0.59 | 0.65 | 0.63 | 0.53 | 0.59 | 0.50 | 0.69 | 0.63 |
| 0.76 | 0.79 | 0.69 | 0.75 | 0.78 | 0.78 | 0.72 | 0.80 | 0.79 |



|    |      |      |      |      |      |      |      |      |      |
|----|------|------|------|------|------|------|------|------|------|
| 1  |      |      |      |      |      |      |      |      |      |
| 2  | 0.73 | 0.72 | 0.66 | 0.74 | 0.74 | 0.79 | 0.69 | 0.77 | 0.75 |
| 3  | 0.73 | 0.67 | 0.73 | 0.78 | 0.77 | 0.75 | 0.76 | 0.79 | 0.75 |
| 4  | 0.73 | 0.74 | 0.67 | 0.74 | 0.79 | 0.74 | 0.75 | 0.76 | 0.77 |
| 5  | 0.62 | 0.62 | 0.61 | 0.55 | 0.45 | 0.54 | 0.48 | 0.66 | 0.58 |
| 6  | 0.86 | 0.87 | 0.85 | 0.85 | 0.87 | 0.86 | 0.85 | 0.86 | 0.88 |
| 7  | 0.86 | 0.86 | 0.83 | 0.86 | 0.89 | 0.86 | 0.87 | 0.87 | 0.88 |
| 8  | 0.89 | 0.82 | 0.85 | 0.85 | 0.85 | 0.87 | 0.84 | 0.87 | 0.84 |
| 9  | 0.82 | 0.84 | 0.80 | 0.85 | 0.85 | 0.87 | 0.77 | 0.86 | 0.82 |
| 10 | 0.89 | 0.89 | 0.87 | 0.87 | 0.89 | 0.88 | 0.87 | 0.88 | 0.89 |
| 11 | 0.91 | 0.88 | 0.92 | 0.92 | 0.92 | 0.92 | 0.91 | 0.93 | 0.92 |
| 12 | 0.75 | 0.62 | 0.74 | 0.67 | 0.76 | 0.70 | 0.64 | 0.78 | 0.74 |
| 13 | 0.81 | 0.75 | 0.73 | 0.73 | 0.70 | 0.73 | 0.64 | 0.71 | 0.71 |
| 14 | 0.89 | 0.87 | 0.85 | 0.85 | 0.88 | 0.80 | 0.83 | 0.87 | 0.83 |
| 15 | 0.91 | 0.90 | 0.90 | 0.89 | 0.88 | 0.87 | 0.89 | 0.90 | 0.89 |
| 16 | 0.91 | 0.92 | 0.91 | 0.92 | 0.93 | 0.92 | 0.88 | 0.93 | 0.93 |
| 17 | 0.95 | 0.96 | 0.96 | 0.96 | 0.96 | 0.96 | 0.96 | 0.96 | 0.96 |
| 18 | 0.97 | 0.96 | 0.96 | 0.95 | 0.97 | 0.97 | 0.97 | 0.97 | 0.97 |
| 19 |      |      |      |      |      |      |      |      |      |
| 20 |      |      |      |      |      |      |      |      |      |
| 21 |      |      |      |      |      |      |      |      |      |
| 22 |      |      |      |      |      |      |      |      |      |
| 23 |      |      |      |      |      |      |      |      |      |
| 24 |      |      |      |      |      |      |      |      |      |
| 25 |      |      |      |      |      |      |      |      |      |
| 26 |      |      |      |      |      |      |      |      |      |
| 27 |      |      |      |      |      |      |      |      |      |
| 28 |      |      |      |      |      |      |      |      |      |
| 29 |      |      |      |      |      |      |      |      |      |
| 30 |      |      |      |      |      |      |      |      |      |
| 31 |      |      |      |      |      |      |      |      |      |
| 32 |      |      |      |      |      |      |      |      |      |
| 33 |      |      |      |      |      |      |      |      |      |
| 34 |      |      |      |      |      |      |      |      |      |
| 35 |      |      |      |      |      |      |      |      |      |
| 36 |      |      |      |      |      |      |      |      |      |
| 37 |      |      |      |      |      |      |      |      |      |
| 38 |      |      |      |      |      |      |      |      |      |
| 39 |      |      |      |      |      |      |      |      |      |
| 40 |      |      |      |      |      |      |      |      |      |
| 41 |      |      |      |      |      |      |      |      |      |
| 42 |      |      |      |      |      |      |      |      |      |
| 43 |      |      |      |      |      |      |      |      |      |
| 44 |      |      |      |      |      |      |      |      |      |
| 45 |      |      |      |      |      |      |      |      |      |
| 46 |      |      |      |      |      |      |      |      |      |
| 47 |      |      |      |      |      |      |      |      |      |
| 48 |      |      |      |      |      |      |      |      |      |
| 49 |      |      |      |      |      |      |      |      |      |
| 50 |      |      |      |      |      |      |      |      |      |
| 51 |      |      |      |      |      |      |      |      |      |
| 52 |      |      |      |      |      |      |      |      |      |
| 53 |      |      |      |      |      |      |      |      |      |
| 54 |      |      |      |      |      |      |      |      |      |
| 55 |      |      |      |      |      |      |      |      |      |
| 56 |      |      |      |      |      |      |      |      |      |
| 57 |      |      |      |      |      |      |      |      |      |
| 58 |      |      |      |      |      |      |      |      |      |
| 59 |      |      |      |      |      |      |      |      |      |
| 60 |      |      |      |      |      |      |      |      |      |

1  
2  
3  
4  
5  
6  
7  
8  
9  
10  
11  
12  
13  
14  
15  
16  
17  
18  
19  
20  
21  
22  
23  
24  
25  
26  
27  
28  
29  
30  
31  
32  
33  
34  
35  
36  
37  
38  
39  
40  
41  
42  
43  
44  
45  
46  
47  
48  
49  
50  
51  
52  
53  
54  
55  
56  
57  
58  
59  
60

819 827 845 861 900 923 938 963 974

| RTR  | RJZ  | RHM  | RTG  | R1H  | RK9  | RXW  | RR8  | RWP  |
|------|------|------|------|------|------|------|------|------|
| 0.71 | 0.72 | 0.72 | 0.72 | 0.75 | 0.72 | 0.74 | 0.74 | 0.74 |
| 0.71 | 0.71 | 0.73 | 0.72 | 0.73 | 0.73 | 0.74 | 0.74 | 0.74 |
| 0.61 | 0.61 | 0.65 | 0.63 | 0.63 | 0.62 | 0.61 | 0.68 | 0.60 |
| 0.45 | 0.36 | 0.44 | 0.47 | 0.49 | 0.47 | 0.48 | 0.53 | 0.45 |
| 0.56 | 0.54 | 0.63 | 0.58 | 0.60 | 0.62 | 0.59 | 0.62 | 0.55 |
| 0.73 | 0.74 | 0.75 | 0.75 | 0.77 | 0.75 | 0.77 | 0.75 | 0.77 |
| 0.77 | 0.77 | 0.77 | 0.77 | 0.79 | 0.78 | 0.79 | 0.79 | 0.80 |
| 0.69 | 0.70 | 0.69 | 0.66 | 0.74 | 0.69 | 0.70 | 0.70 | 0.71 |
| 0.72 | 0.69 | 0.69 | 0.69 | 0.72 | 0.72 | 0.71 | 0.71 | 0.74 |
| 0.66 | 0.71 | 0.70 | 0.69 | 0.75 | 0.70 | 0.72 | 0.67 | 0.72 |
| 0.66 | 0.67 | 0.72 | 0.67 | 0.68 | 0.68 | 0.68 | 0.70 | 0.67 |
| 0.34 | 0.35 | 0.43 | 0.42 | 0.42 | 0.35 | 0.50 | 0.46 | 0.37 |
| 0.74 | 0.73 | 0.74 | 0.73 | 0.78 | 0.75 | 0.77 | 0.75 | 0.77 |
| 0.81 | 0.82 | 0.82 | 0.82 | 0.84 | 0.82 | 0.84 | 0.84 | 0.84 |
| 0.62 | 0.66 | 0.70 | 0.62 | 0.68 | 0.69 | 0.69 | 0.69 | 0.64 |
| 0.56 | 0.64 | 0.65 | 0.63 | 0.67 | 0.68 | 0.64 | 0.70 | 0.65 |
| 0.79 | 0.81 | 0.79 | 0.81 | 0.83 | 0.81 | 0.82 | 0.80 | 0.81 |
| 0.73 | 0.68 | 0.70 | 0.72 | 0.78 | 0.75 | 0.78 | 0.71 | 0.75 |
| 0.74 | 0.76 | 0.79 | 0.76 | 0.78 | 0.78 | 0.75 | 0.81 | 0.76 |
| 0.82 | 0.84 | 0.83 | 0.82 | 0.85 | 0.83 | 0.84 | 0.85 | 0.85 |
| 0.81 | 0.80 | 0.82 | 0.82 | 0.83 | 0.82 | 0.84 | 0.84 | 0.84 |
| 0.81 | 0.81 | 0.81 | 0.82 | 0.85 | 0.82 | 0.83 | 0.84 | 0.83 |
| 0.38 | 0.42 | 0.48 | 0.36 | 0.46 | 0.36 | 0.31 | 0.42 | 0.42 |
| 0.71 | 0.75 | 0.72 | 0.74 | 0.76 | 0.74 | 0.74 | 0.76 | 0.72 |
| 0.74 | 0.73 | 0.77 | 0.70 | 0.80 | 0.78 | 0.78 | 0.76 | 0.79 |
| 0.83 | 0.83 | 0.82 | 0.85 | 0.85 | 0.84 | 0.86 | 0.87 | 0.86 |
| 0.87 | 0.88 | 0.88 | 0.88 | 0.89 | 0.89 | 0.89 | 0.89 | 0.89 |
| 0.72 | 0.72 | 0.75 | 0.72 | 0.76 | 0.71 | 0.69 | 0.77 | 0.73 |
| 0.71 | 0.65 | 0.68 | 0.72 | 0.79 | 0.70 | 0.76 | 0.70 | 0.75 |
| 0.77 | 0.78 | 0.79 | 0.75 | 0.83 | 0.75 | 0.79 | 0.74 | 0.81 |
| 0.75 | 0.71 | 0.76 | 0.69 | 0.77 | 0.78 | 0.71 | 0.72 | 0.73 |
| 0.83 | 0.84 | 0.84 | 0.81 | 0.88 | 0.84 | 0.85 | 0.85 | 0.86 |
| 0.65 | 0.62 | 0.61 | 0.59 | 0.73 | 0.65 | 0.66 | 0.69 | 0.63 |
| 0.79 | 0.81 | 0.81 | 0.79 | 0.83 | 0.80 | 0.79 | 0.83 | 0.83 |

|    |      |      |      |      |      |      |      |      |      |
|----|------|------|------|------|------|------|------|------|------|
| 1  |      |      |      |      |      |      |      |      |      |
| 2  | 0.70 | 0.78 | 0.77 | 0.77 | 0.85 | 0.75 | 0.79 | 0.79 | 0.74 |
| 3  | 0.76 | 0.77 | 0.79 | 0.79 | 0.83 | 0.79 | 0.77 | 0.80 | 0.72 |
| 4  | 0.79 | 0.75 | 0.79 | 0.79 | 0.81 | 0.75 | 0.79 | 0.83 | 0.81 |
| 5  | 0.67 | 0.68 | 0.63 | 0.60 | 0.71 | 0.68 | 0.62 | 0.65 | 0.65 |
| 6  | 0.88 | 0.87 | 0.90 | 0.88 | 0.89 | 0.89 | 0.88 | 0.91 | 0.89 |
| 7  | 0.88 | 0.88 | 0.88 | 0.89 | 0.89 | 0.87 | 0.89 | 0.90 | 0.90 |
| 8  | 0.84 | 0.88 | 0.88 | 0.82 | 0.90 | 0.88 | 0.88 | 0.85 | 0.86 |
| 9  | 0.80 | 0.87 | 0.87 | 0.85 | 0.90 | 0.87 | 0.89 | 0.89 | 0.87 |
| 10 | 0.89 | 0.89 | 0.88 | 0.89 | 0.92 | 0.89 | 0.91 | 0.90 | 0.90 |
| 11 | 0.91 | 0.92 | 0.93 | 0.92 | 0.93 | 0.89 | 0.92 | 0.94 | 0.92 |
| 12 | 0.65 | 0.80 | 0.80 | 0.65 | 0.76 | 0.78 | 0.70 | 0.71 | 0.75 |
| 13 | 0.70 | 0.80 | 0.74 | 0.70 | 0.79 | 0.72 | 0.80 | 0.68 | 0.62 |
| 14 | 0.87 | 0.87 | 0.87 | 0.87 | 0.86 | 0.86 | 0.87 | 0.82 | 0.92 |
| 15 | 0.90 | 0.90 | 0.91 | 0.90 | 0.93 | 0.88 | 0.90 | 0.87 | 0.92 |
| 16 | 0.91 | 0.93 | 0.94 | 0.91 | 0.93 | 0.93 | 0.92 | 0.94 | 0.92 |
| 17 | 0.96 | 0.96 | 0.96 | 0.96 | 0.97 | 0.96 | 0.96 | 0.96 | 0.96 |
| 18 | 0.97 | 0.97 | 0.97 | 0.97 | 0.97 | 0.97 | 0.97 | 0.98 | 0.97 |
| 19 |      |      |      |      |      |      |      |      |      |
| 20 |      |      |      |      |      |      |      |      |      |
| 21 |      |      |      |      |      |      |      |      |      |
| 22 |      |      |      |      |      |      |      |      |      |
| 23 |      |      |      |      |      |      |      |      |      |
| 24 |      |      |      |      |      |      |      |      |      |
| 25 |      |      |      |      |      |      |      |      |      |
| 26 |      |      |      |      |      |      |      |      |      |
| 27 |      |      |      |      |      |      |      |      |      |
| 28 |      |      |      |      |      |      |      |      |      |
| 29 |      |      |      |      |      |      |      |      |      |
| 30 |      |      |      |      |      |      |      |      |      |
| 31 |      |      |      |      |      |      |      |      |      |
| 32 |      |      |      |      |      |      |      |      |      |
| 33 |      |      |      |      |      |      |      |      |      |
| 34 |      |      |      |      |      |      |      |      |      |
| 35 |      |      |      |      |      |      |      |      |      |
| 36 |      |      |      |      |      |      |      |      |      |
| 37 |      |      |      |      |      |      |      |      |      |
| 38 |      |      |      |      |      |      |      |      |      |
| 39 |      |      |      |      |      |      |      |      |      |
| 40 |      |      |      |      |      |      |      |      |      |
| 41 |      |      |      |      |      |      |      |      |      |
| 42 |      |      |      |      |      |      |      |      |      |
| 43 |      |      |      |      |      |      |      |      |      |
| 44 |      |      |      |      |      |      |      |      |      |
| 45 |      |      |      |      |      |      |      |      |      |
| 46 |      |      |      |      |      |      |      |      |      |
| 47 |      |      |      |      |      |      |      |      |      |
| 48 |      |      |      |      |      |      |      |      |      |
| 49 |      |      |      |      |      |      |      |      |      |
| 50 |      |      |      |      |      |      |      |      |      |
| 51 |      |      |      |      |      |      |      |      |      |
| 52 |      |      |      |      |      |      |      |      |      |
| 53 |      |      |      |      |      |      |      |      |      |
| 54 |      |      |      |      |      |      |      |      |      |
| 55 |      |      |      |      |      |      |      |      |      |
| 56 |      |      |      |      |      |      |      |      |      |
| 57 |      |      |      |      |      |      |      |      |      |
| 58 |      |      |      |      |      |      |      |      |      |
| 59 |      |      |      |      |      |      |      |      |      |
| 60 |      |      |      |      |      |      |      |      |      |

1  
2  
3  
4  
5  
6  
7  
8  
9  
10  
11  
12  
13  
14  
15  
16  
17  
18  
19  
20  
21  
22  
23  
24  
25  
26  
27  
28  
29  
30  
31  
32  
33  
34  
35  
36  
37  
38  
39  
40  
41  
42  
43  
44  
45  
46  
47  
48  
49  
50  
51  
52  
53  
54  
55  
56  
57  
58  
59  
60

976 982 992 1024 1053 1056 1062 1067 1225

| RWF  | RJE  | RGT  | RWA  | RJ1  | RRV  | RH8  | RVV  | RM1  |
|------|------|------|------|------|------|------|------|------|
| 0.74 | 0.74 | 0.74 | 0.75 | 0.76 | 0.78 | 0.74 | 0.75 | 0.76 |
| 0.73 | 0.76 | 0.75 | 0.76 | 0.76 | 0.75 | 0.74 | 0.76 | 0.78 |
| 0.57 | 0.65 | 0.66 | 0.69 | 0.65 | 0.67 | 0.63 | 0.62 | 0.66 |
| 0.52 | 0.50 | 0.49 | 0.50 | 0.50 | 0.44 | 0.48 | 0.46 | 0.51 |
| 0.54 | 0.60 | 0.59 | 0.64 | 0.62 | 0.63 | 0.57 | 0.64 | 0.66 |
| 0.75 | 0.77 | 0.77 | 0.77 | 0.78 | 0.80 | 0.77 | 0.79 | 0.81 |
| 0.80 | 0.80 | 0.80 | 0.80 | 0.81 | 0.81 | 0.80 | 0.81 | 0.83 |
| 0.72 | 0.70 | 0.73 | 0.71 | 0.74 | 0.76 | 0.71 | 0.74 | 0.76 |
| 0.70 | 0.71 | 0.75 | 0.73 | 0.75 | 0.77 | 0.74 | 0.71 | 0.76 |
| 0.71 | 0.71 | 0.70 | 0.72 | 0.73 | 0.76 | 0.70 | 0.75 | 0.75 |
| 0.65 | 0.71 | 0.70 | 0.71 | 0.70 | 0.71 | 0.66 | 0.69 | 0.72 |
| 0.42 | 0.43 | 0.51 | 0.41 | 0.44 | 0.44 | 0.47 | 0.42 | 0.47 |
| 0.75 | 0.77 | 0.77 | 0.78 | 0.80 | 0.79 | 0.75 | 0.80 | 0.79 |
| 0.84 | 0.84 | 0.84 | 0.84 | 0.85 | 0.85 | 0.84 | 0.86 | 0.87 |
| 0.64 | 0.67 | 0.70 | 0.69 | 0.70 | 0.71 | 0.67 | 0.70 | 0.68 |
| 0.53 | 0.66 | 0.63 | 0.68 | 0.65 | 0.70 | 0.61 | 0.68 | 0.67 |
| 0.80 | 0.83 | 0.81 | 0.83 | 0.83 | 0.84 | 0.81 | 0.84 | 0.85 |
| 0.77 | 0.78 | 0.74 | 0.76 | 0.77 | 0.77 | 0.74 | 0.77 | 0.79 |
| 0.72 | 0.77 | 0.80 | 0.81 | 0.78 | 0.80 | 0.74 | 0.77 | 0.81 |
| 0.85 | 0.84 | 0.85 | 0.86 | 0.86 | 0.87 | 0.84 | 0.86 | 0.87 |
| 0.84 | 0.85 | 0.84 | 0.83 | 0.86 | 0.85 | 0.84 | 0.85 | 0.86 |
| 0.83 | 0.84 | 0.83 | 0.83 | 0.85 | 0.86 | 0.82 | 0.85 | 0.86 |
| 0.34 | 0.45 | 0.46 | 0.50 | 0.37 | 0.50 | 0.27 | 0.53 | 0.47 |
| 0.71 | 0.76 | 0.75 | 0.77 | 0.75 | 0.77 | 0.71 | 0.73 | 0.76 |
| 0.72 | 0.75 | 0.74 | 0.79 | 0.74 | 0.81 | 0.72 | 0.82 | 0.81 |
| 0.86 | 0.88 | 0.85 | 0.87 | 0.87 | 0.87 | 0.86 | 0.86 | 0.88 |
| 0.89 | 0.89 | 0.89 | 0.90 | 0.90 | 0.90 | 0.89 | 0.90 | 0.91 |
| 0.64 | 0.76 | 0.75 | 0.77 | 0.77 | 0.78 | 0.69 | 0.74 | 0.78 |
| 0.75 | 0.76 | 0.75 | 0.75 | 0.73 | 0.75 | 0.72 | 0.78 | 0.78 |
| 0.80 | 0.81 | 0.80 | 0.80 | 0.82 | 0.82 | 0.72 | 0.82 | 0.82 |
| 0.72 | 0.78 | 0.76 | 0.77 | 0.71 | 0.77 | 0.75 | 0.73 | 0.77 |
| 0.84 | 0.85 | 0.85 | 0.87 | 0.87 | 0.90 | 0.84 | 0.87 | 0.88 |
| 0.63 | 0.68 | 0.64 | 0.76 | 0.69 | 0.66 | 0.58 | 0.75 | 0.73 |
| 0.78 | 0.82 | 0.81 | 0.85 | 0.84 | 0.84 | 0.80 | 0.82 | 0.82 |

|    |      |      |      |      |      |      |      |      |      |
|----|------|------|------|------|------|------|------|------|------|
| 1  |      |      |      |      |      |      |      |      |      |
| 2  | 0.75 | 0.81 | 0.76 | 0.76 | 0.83 | 0.83 | 0.74 | 0.80 | 0.82 |
| 3  | 0.77 | 0.77 | 0.79 | 0.76 | 0.83 | 0.84 | 0.74 | 0.81 | 0.82 |
| 4  | 0.76 | 0.82 | 0.79 | 0.79 | 0.85 | 0.82 | 0.80 | 0.80 | 0.82 |
| 5  | 0.64 | 0.70 | 0.64 | 0.66 | 0.63 | 0.73 | 0.56 | 0.69 | 0.71 |
| 6  | 0.85 | 0.90 | 0.90 | 0.92 | 0.88 | 0.90 | 0.87 | 0.89 | 0.91 |
| 7  | 0.88 | 0.92 | 0.89 | 0.89 | 0.91 | 0.91 | 0.90 | 0.91 | 0.91 |
| 8  | 0.87 | 0.88 | 0.86 | 0.88 | 0.89 | 0.89 | 0.86 | 0.91 | 0.86 |
| 9  | 0.84 | 0.88 | 0.89 | 0.86 | 0.90 | 0.91 | 0.85 | 0.91 | 0.91 |
| 10 | 0.90 | 0.91 | 0.90 | 0.92 | 0.92 | 0.92 | 0.90 | 0.91 | 0.92 |
| 11 | 0.94 | 0.92 | 0.94 | 0.94 | 0.94 | 0.94 | 0.94 | 0.95 | 0.95 |
| 12 | 0.76 | 0.74 | 0.71 | 0.77 | 0.81 | 0.83 | 0.69 | 0.75 | 0.81 |
| 13 | 0.78 | 0.79 | 0.75 | 0.69 | 0.77 | 0.77 | 0.66 | 0.83 | 0.66 |
| 14 | 0.91 | 0.87 | 0.83 | 0.91 | 0.88 | 0.84 | 0.89 | 0.92 | 0.87 |
| 15 | 0.90 | 0.91 | 0.91 | 0.92 | 0.92 | 0.91 | 0.82 | 0.93 | 0.91 |
| 16 | 0.92 | 0.94 | 0.94 | 0.94 | 0.94 | 0.94 | 0.92 | 0.94 | 0.94 |
| 17 | 0.96 | 0.97 | 0.97 | 0.97 | 0.97 | 0.97 | 0.96 | 0.97 | 0.97 |
| 18 | 0.97 | 0.97 | 0.98 | 0.97 | 0.98 | 0.98 | 0.97 | 0.97 | 0.97 |
| 19 |      |      |      |      |      |      |      |      |      |
| 20 |      |      |      |      |      |      |      |      |      |
| 21 |      |      |      |      |      |      |      |      |      |
| 22 |      |      |      |      |      |      |      |      |      |
| 23 |      |      |      |      |      |      |      |      |      |
| 24 |      |      |      |      |      |      |      |      |      |
| 25 |      |      |      |      |      |      |      |      |      |
| 26 |      |      |      |      |      |      |      |      |      |
| 27 |      |      |      |      |      |      |      |      |      |
| 28 |      |      |      |      |      |      |      |      |      |
| 29 |      |      |      |      |      |      |      |      |      |
| 30 |      |      |      |      |      |      |      |      |      |
| 31 |      |      |      |      |      |      |      |      |      |
| 32 |      |      |      |      |      |      |      |      |      |
| 33 |      |      |      |      |      |      |      |      |      |
| 34 |      |      |      |      |      |      |      |      |      |
| 35 |      |      |      |      |      |      |      |      |      |
| 36 |      |      |      |      |      |      |      |      |      |
| 37 |      |      |      |      |      |      |      |      |      |
| 38 |      |      |      |      |      |      |      |      |      |
| 39 |      |      |      |      |      |      |      |      |      |
| 40 |      |      |      |      |      |      |      |      |      |
| 41 |      |      |      |      |      |      |      |      |      |
| 42 |      |      |      |      |      |      |      |      |      |
| 43 |      |      |      |      |      |      |      |      |      |
| 44 |      |      |      |      |      |      |      |      |      |
| 45 |      |      |      |      |      |      |      |      |      |
| 46 |      |      |      |      |      |      |      |      |      |
| 47 |      |      |      |      |      |      |      |      |      |
| 48 |      |      |      |      |      |      |      |      |      |
| 49 |      |      |      |      |      |      |      |      |      |
| 50 |      |      |      |      |      |      |      |      |      |
| 51 |      |      |      |      |      |      |      |      |      |
| 52 |      |      |      |      |      |      |      |      |      |
| 53 |      |      |      |      |      |      |      |      |      |
| 54 |      |      |      |      |      |      |      |      |      |
| 55 |      |      |      |      |      |      |      |      |      |
| 56 |      |      |      |      |      |      |      |      |      |
| 57 |      |      |      |      |      |      |      |      |      |
| 58 |      |      |      |      |      |      |      |      |      |
| 59 |      |      |      |      |      |      |      |      |      |
| 60 |      |      |      |      |      |      |      |      |      |

1  
2  
3  
4  
5  
6  
7  
8  
9  
10  
11  
12  
13  
14  
15  
16  
17  
18  
19  
20  
21  
22  
23  
24  
25  
26  
27  
28  
29  
30  
31  
32  
33  
34  
35  
36  
37  
38  
39  
40  
41  
42  
43  
44  
45  
46  
47  
48  
49  
50  
51  
52  
53  
54  
55  
56  
57  
58  
59  
60

1324 1344 1437 1451 1513 1972

| RTD  | RTE  | RWE  | RTH  | RHQ  | RPY  |
|------|------|------|------|------|------|
| 0.78 | 0.79 | 0.82 | 0.81 | 0.81 | 0.86 |
| 0.79 | 0.80 | 0.81 | 0.80 | 0.82 | 0.85 |
| 0.73 | 0.67 | 0.74 | 0.71 | 0.73 | 0.72 |
| 0.54 | 0.57 | 0.61 | 0.63 | 0.59 | 0.67 |
| 0.67 | 0.63 | 0.68 | 0.68 | 0.69 | 0.64 |
| 0.81 | 0.82 | 0.84 | 0.83 | 0.82 | 0.88 |
| 0.84 | 0.84 | 0.85 | 0.85 | 0.86 | 0.89 |
| 0.75 | 0.77 | 0.81 | 0.80 | 0.81 | 0.86 |
| 0.77 | 0.77 | 0.80 | 0.79 | 0.80 | 0.85 |
| 0.75 | 0.78 | 0.80 | 0.79 | 0.78 | 0.86 |
| 0.73 | 0.72 | 0.79 | 0.75 | 0.77 | 0.73 |
| 0.48 | 0.53 | 0.55 | 0.60 | 0.48 | 0.57 |
| 0.79 | 0.80 | 0.84 | 0.83 | 0.83 | 0.86 |
| 0.87 | 0.87 | 0.89 | 0.88 | 0.89 | 0.91 |
| 0.74 | 0.72 | 0.78 | 0.70 | 0.78 | 0.76 |
| 0.71 | 0.65 | 0.77 | 0.69 | 0.74 | 0.65 |
| 0.83 | 0.86 | 0.88 | 0.86 | 0.87 | 0.90 |
| 0.76 | 0.82 | 0.83 | 0.79 | 0.81 | 0.86 |
| 0.82 | 0.81 | 0.85 | 0.83 | 0.83 | 0.81 |
| 0.88 | 0.89 | 0.90 | 0.88 | 0.90 | 0.92 |
| 0.88 | 0.87 | 0.90 | 0.88 | 0.89 | 0.92 |
| 0.87 | 0.87 | 0.89 | 0.88 | 0.89 | 0.91 |
| 0.56 | 0.41 | 0.54 | 0.54 | 0.44 | 0.43 |
| 0.74 | 0.75 | 0.84 | 0.78 | 0.80 | 0.78 |
| 0.81 | 0.81 | 0.86 | 0.83 | 0.81 | 0.84 |
| 0.89 | 0.87 | 0.89 | 0.90 | 0.91 | 0.91 |
| 0.91 | 0.92 | 0.92 | 0.92 | 0.93 | 0.95 |
| 0.79 | 0.71 | 0.83 | 0.79 | 0.82 | 0.74 |
| 0.72 | 0.79 | 0.83 | 0.78 | 0.77 | 0.83 |
| 0.83 | 0.83 | 0.87 | 0.83 | 0.85 | 0.90 |
| 0.81 | 0.79 | 0.83 | 0.77 | 0.80 | 0.78 |
| 0.89 | 0.89 | 0.90 | 0.90 | 0.90 | 0.94 |
| 0.67 | 0.72 | 0.77 | 0.76 | 0.76 | 0.68 |
| 0.85 | 0.83 | 0.89 | 0.86 | 0.87 | 0.85 |

|    |      |      |      |      |      |      |
|----|------|------|------|------|------|------|
| 1  |      |      |      |      |      |      |
| 2  | 0.83 | 0.81 | 0.85 | 0.82 | 0.85 | 0.90 |
| 3  | 0.84 | 0.82 | 0.86 | 0.86 | 0.86 | 0.90 |
| 4  | 0.87 | 0.83 | 0.87 | 0.84 | 0.88 | 0.88 |
| 5  | 0.74 | 0.74 | 0.76 | 0.69 | 0.70 | 0.62 |
| 6  | 0.92 | 0.91 | 0.93 | 0.91 | 0.92 | 0.90 |
| 7  | 0.93 | 0.92 | 0.93 | 0.92 | 0.94 | 0.95 |
| 8  | 0.90 | 0.90 | 0.92 | 0.92 | 0.91 | 0.92 |
| 9  | 0.88 | 0.90 | 0.90 | 0.91 | 0.91 | 0.95 |
| 10 | 0.93 | 0.92 | 0.94 | 0.92 | 0.94 | 0.95 |
| 11 | 0.95 | 0.95 | 0.95 | 0.96 | 0.96 | 0.96 |
| 12 | 0.76 | 0.85 | 0.75 | 0.81 | 0.86 | 0.82 |
| 13 | 0.76 | 0.76 | 0.85 | 0.81 | 0.86 | 0.85 |
| 14 | 0.92 | 0.94 | 0.93 | 0.93 | 0.91 | 0.91 |
| 15 | 0.94 | 0.92 | 0.95 | 0.92 | 0.93 | 0.96 |
| 16 | 0.94 | 0.93 | 0.95 | 0.95 | 0.96 | 0.96 |
| 17 | 0.97 | 0.98 | 0.98 | 0.98 | 0.98 | 0.98 |
| 18 | 0.98 | 0.98 | 0.98 | 0.98 | 0.98 | 0.99 |
| 19 |      |      |      |      |      |      |
| 20 |      |      |      |      |      |      |
| 21 |      |      |      |      |      |      |
| 22 |      |      |      |      |      |      |
| 23 |      |      |      |      |      |      |
| 24 |      |      |      |      |      |      |
| 25 |      |      |      |      |      |      |
| 26 |      |      |      |      |      |      |
| 27 |      |      |      |      |      |      |
| 28 |      |      |      |      |      |      |
| 29 |      |      |      |      |      |      |
| 30 |      |      |      |      |      |      |
| 31 |      |      |      |      |      |      |
| 32 |      |      |      |      |      |      |
| 33 |      |      |      |      |      |      |
| 34 |      |      |      |      |      |      |
| 35 |      |      |      |      |      |      |
| 36 |      |      |      |      |      |      |
| 37 |      |      |      |      |      |      |
| 38 |      |      |      |      |      |      |
| 39 |      |      |      |      |      |      |
| 40 |      |      |      |      |      |      |
| 41 |      |      |      |      |      |      |
| 42 |      |      |      |      |      |      |
| 43 |      |      |      |      |      |      |
| 44 |      |      |      |      |      |      |
| 45 |      |      |      |      |      |      |
| 46 |      |      |      |      |      |      |
| 47 |      |      |      |      |      |      |
| 48 |      |      |      |      |      |      |
| 49 |      |      |      |      |      |      |
| 50 |      |      |      |      |      |      |
| 51 |      |      |      |      |      |      |
| 52 |      |      |      |      |      |      |
| 53 |      |      |      |      |      |      |
| 54 |      |      |      |      |      |      |
| 55 |      |      |      |      |      |      |
| 56 |      |      |      |      |      |      |
| 57 |      |      |      |      |      |      |
| 58 |      |      |      |      |      |      |
| 59 |      |      |      |      |      |      |
| 60 |      |      |      |      |      |      |

STROBE Statement—Checklist of items that should be included in reports of *cross-sectional studies*

|                              | Item No | Recommendation                                                                                                                                                                                               | Page No |
|------------------------------|---------|--------------------------------------------------------------------------------------------------------------------------------------------------------------------------------------------------------------|---------|
| <b>Title and abstract</b>    | 1       | (a) Indicate the study's design with a commonly used term in the title or the abstract                                                                                                                       | 1       |
|                              |         | (b) Provide in the abstract an informative and balanced summary of what was done and what was found                                                                                                          | 2       |
| <b>Introduction</b>          |         |                                                                                                                                                                                                              |         |
| Background/rationale         | 2       | Explain the scientific background and rationale for the investigation being reported                                                                                                                         | 3,4     |
| Objectives                   | 3       | State specific objectives, including any prespecified hypotheses                                                                                                                                             | 2,4     |
| <b>Methods</b>               |         |                                                                                                                                                                                                              |         |
| Study design                 | 4       | Present key elements of study design early in the paper                                                                                                                                                      | 4,5     |
| Setting                      | 5       | Describe the setting, locations, and relevant dates, including periods of recruitment, exposure, follow-up, and data collection                                                                              | 4       |
| Participants                 | 6       | (a) Give the eligibility criteria, and the sources and methods of selection of participants                                                                                                                  | 4       |
| Variables                    | 7       | Clearly define all outcomes, exposures, predictors, potential confounders, and effect modifiers. Give diagnostic criteria, if applicable                                                                     | 4,5     |
| Data sources/<br>measurement | 8*      | For each variable of interest, give sources of data and details of methods of assessment (measurement). Describe comparability of assessment methods if there is more than one group                         | 4       |
| Bias                         | 9       | Describe any efforts to address potential sources of bias                                                                                                                                                    | NA      |
| Study size                   | 10      | Explain how the study size was arrived at                                                                                                                                                                    | 4,5     |
| Quantitative variables       | 11      | Explain how quantitative variables were handled in the analyses. If applicable, describe which groupings were chosen and why                                                                                 | 4       |
| Statistical methods          | 12      | (a) Describe all statistical methods, including those used to control for confounding                                                                                                                        | 4,5     |
|                              |         | (b) Describe any methods used to examine subgroups and interactions                                                                                                                                          | NA      |
|                              |         | (c) Explain how missing data were addressed                                                                                                                                                                  | 5       |
|                              |         | (d) If applicable, describe analytical methods taking account of sampling strategy                                                                                                                           | 5       |
|                              |         | (e) Describe any sensitivity analyses                                                                                                                                                                        | NA      |
| <b>Results</b>               |         |                                                                                                                                                                                                              |         |
| Participants                 | 13*     | (a) Report numbers of individuals at each stage of study—eg numbers potentially eligible, examined for eligibility, confirmed eligible, included in the study, completing follow-up, and analysed            | 5       |
|                              |         | (b) Give reasons for non-participation at each stage                                                                                                                                                         | 5       |
|                              |         | (c) Consider use of a flow diagram                                                                                                                                                                           | NA      |
| Descriptive data             | 14*     | (a) Give characteristics of study participants (eg demographic, clinical, social) and information on exposures and potential confounders                                                                     | 5,6     |
|                              |         | (b) Indicate number of participants with missing data for each variable of interest                                                                                                                          | 5,6     |
| Outcome data                 | 15*     | Report numbers of outcome events or summary measures                                                                                                                                                         | 6       |
| Main results                 | 16      | (a) Give unadjusted estimates and, if applicable, confounder-adjusted estimates and their precision (eg, 95% confidence interval). Make clear which confounders were adjusted for and why they were included | 6       |



|                          |    |                                                                                                                                                                            |     |
|--------------------------|----|----------------------------------------------------------------------------------------------------------------------------------------------------------------------------|-----|
|                          |    | (b) Report category boundaries when continuous variables were categorized                                                                                                  | NA  |
|                          |    | (c) If relevant, consider translating estimates of relative risk into absolute risk for a meaningful time period                                                           | NA  |
| Other analyses           | 17 | Report other analyses done—eg analyses of subgroups and interactions, and sensitivity analyses                                                                             | NA  |
| <b>Discussion</b>        |    |                                                                                                                                                                            |     |
| Key results              | 18 | Summarise key results with reference to study objectives                                                                                                                   | 6   |
| Limitations              | 19 | Discuss limitations of the study, taking into account sources of potential bias or imprecision. Discuss both direction and magnitude of any potential bias                 | 7   |
| Interpretation           | 20 | Give a cautious overall interpretation of results considering objectives, limitations, multiplicity of analyses, results from similar studies, and other relevant evidence | 7,8 |
| Generalisability         | 21 | Discuss the generalisability (external validity) of the study results                                                                                                      | 8   |
| <b>Other information</b> |    |                                                                                                                                                                            |     |
| Funding                  | 22 | Give the source of funding and the role of the funders for the present study and, if applicable, for the original study on which the present article is based              | 1   |

\*Give information separately for exposed and unexposed groups.

**Note:** An Explanation and Elaboration article discusses each checklist item and gives methodological background and published examples of transparent reporting. The STROBE checklist is best used in conjunction with this article (freely available on the Web sites of PLoS Medicine at <http://www.plosmedicine.org/>, Annals of Internal Medicine at <http://www.annals.org/>, and Epidemiology at <http://www.epidem.com/>). Information on the STROBE Initiative is available at [www.strobe-statement.org](http://www.strobe-statement.org).
